# Supplementary material for: The Virus-induced Upregulation of the miR-183/96/182 Cluster and the FoxO Family Protein Members are not Required for the Efficient Replication of HSV-1
Source: Preprints.org preprint supplement (doi:10.20944/preprints202205.0363.v1), 2022-05-26
Supplement: Supplementary file 1 [file Supplement figure legends_inserted.docx]

**Supplement data figure legends**


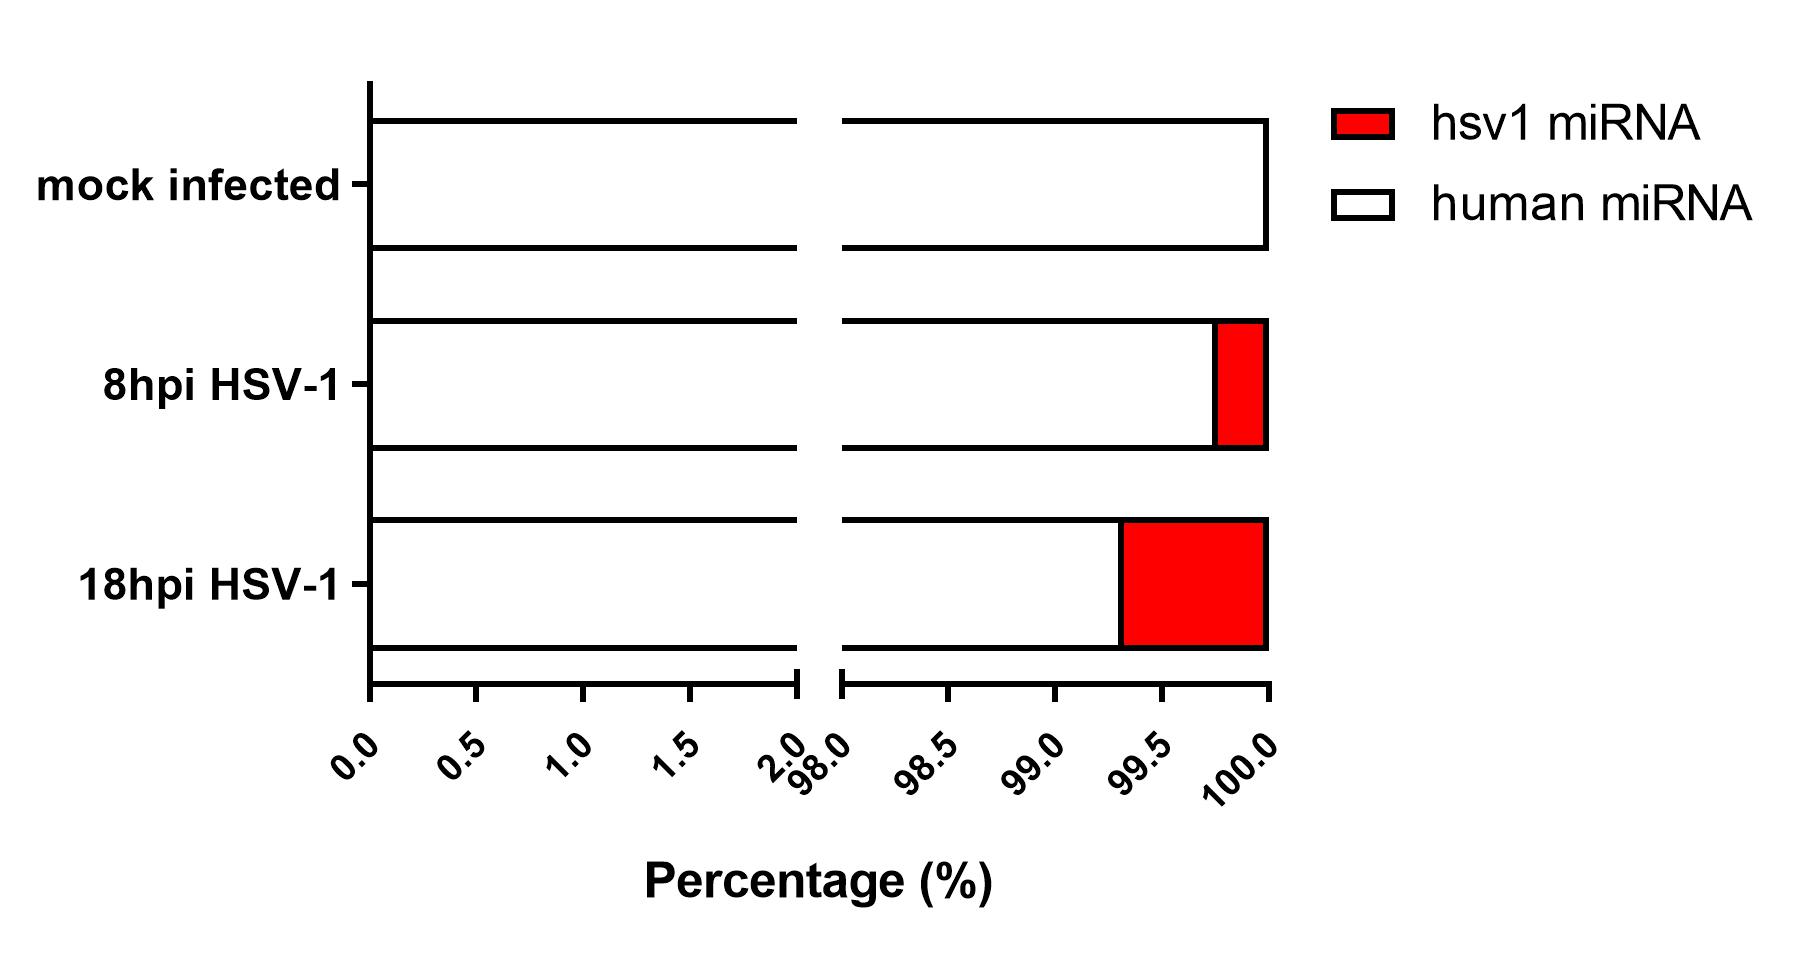


**Figure S1: HSV-1 miRNAs represent only a small fraction of miRNAs in infected cells.** The percentage of HSV-1 miRNAs in the total number of reads aligned to human and HSV-1 miRNA. The results represent the average of four replicates.

**Figure S2: miRNAs found reproducibly deregulated between two data sets.** Deregulated miRNAs were extracted from data sets obtained by sequencing samples of HFF cells productively infected with HSV-1 at different time points. Number of miRNAs shared between data sets is shown, and miRNAs found shared between at least three data sets are listed as (A) upregulated or (B) downregulated.


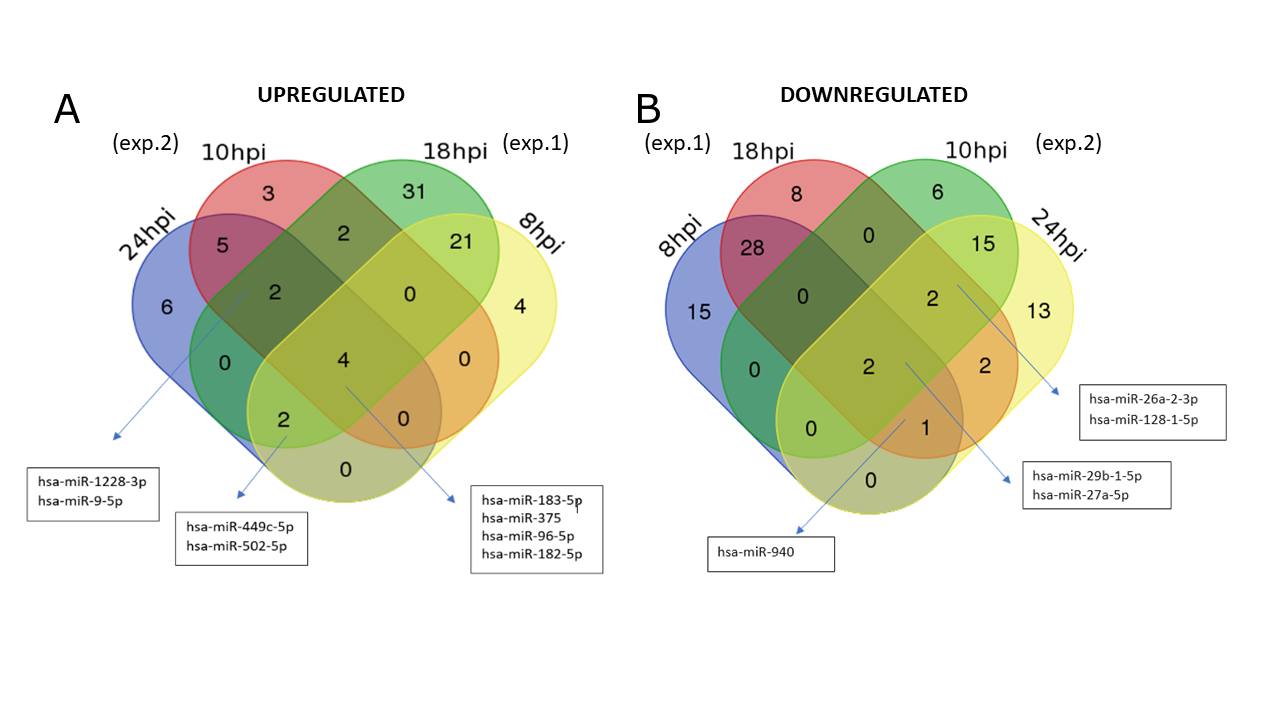

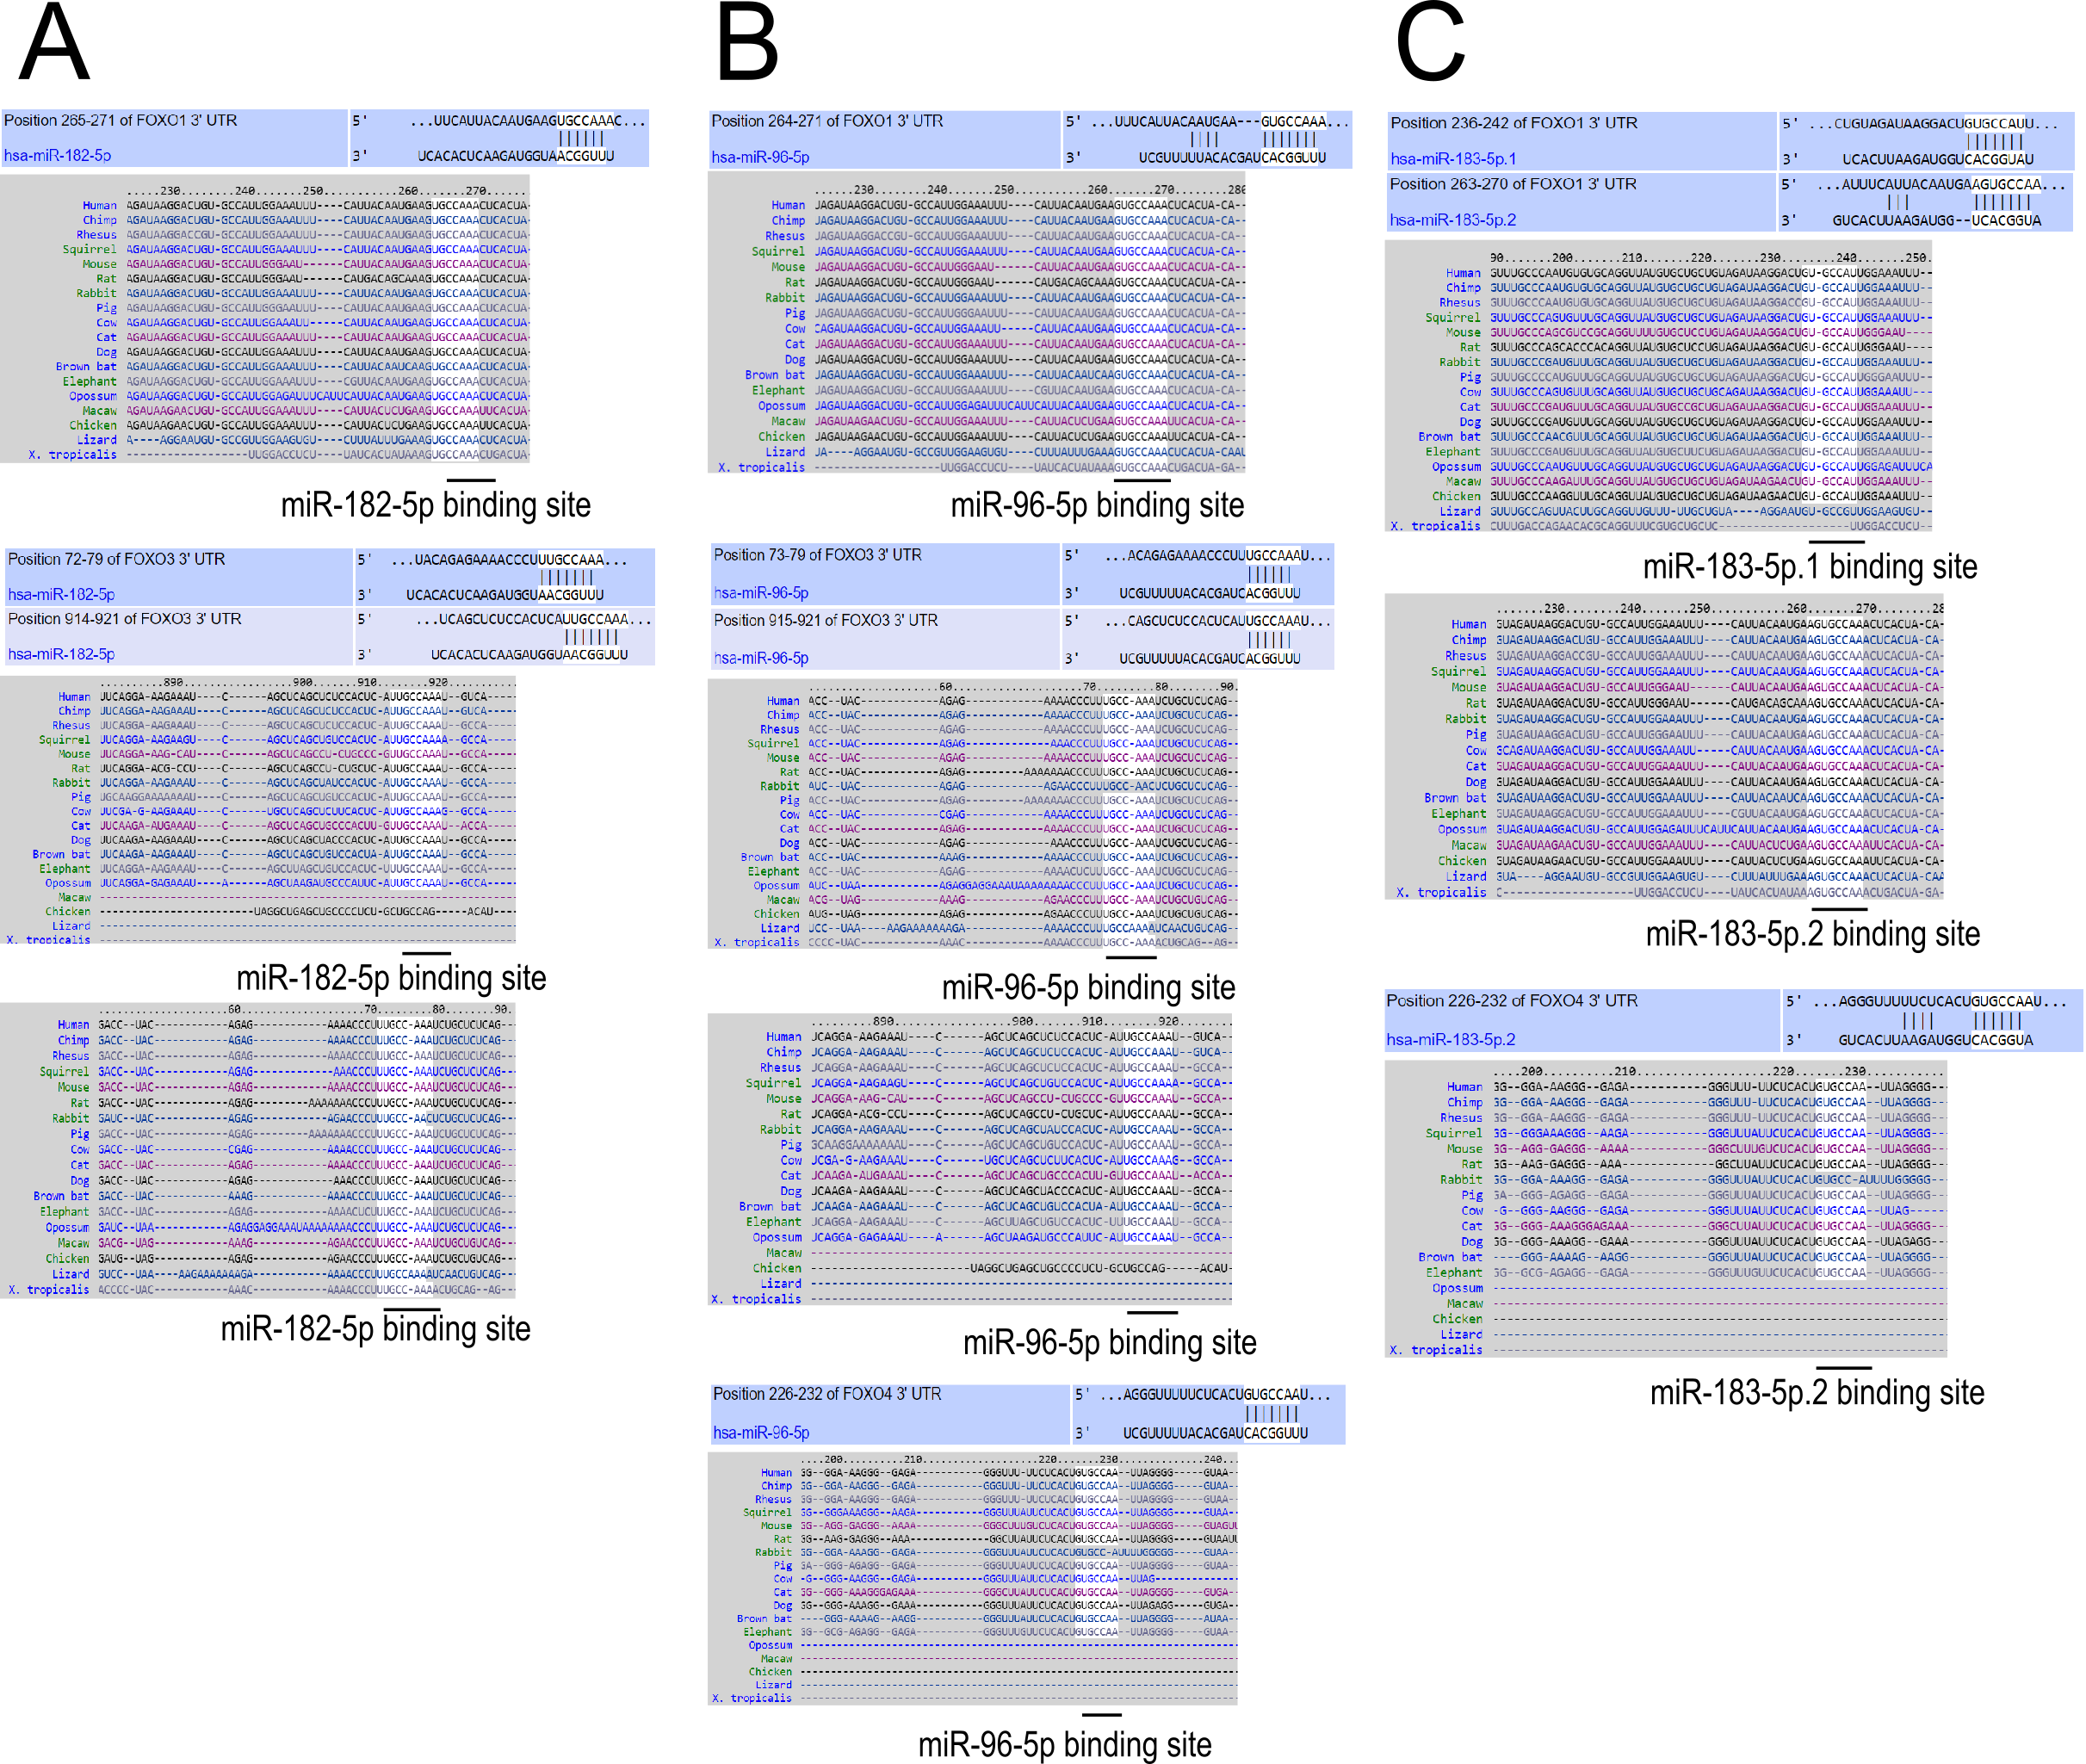


**Figure S3: miRNAs miR-182, -96, -183 target 3'UTRs of FoxO genes**. TargetScan was used to predict miRNAs: miR-182 (A), miR-96 (B), miR-183 (C) pairing to FoxO targets and their conservation across different species.
