# Supplementary material for: The Virus-induced Upregulation of the miR-183/96/182 Cluster and the FoxO Family Protein Members are not Required for the Efficient Replication of HSV-1
Source: Preprints.org preprint supplement (doi:10.20944/preprints202205.0363.v1), 2022-05-26
Supplement: Supplementary file 3 [file Table S1.xlsx]

## Sheet: List1
Table S1: Primers for CRISPR-Cas9 constructs used for generating FoxO family knockout cells and negative control
construct	sequence
FOXO1-KO-1-F	CACCGTAGCATTTGAGCTAGTTCGA
FOXO1-KO-1-R	AAACTCGAACTAGCTCAAATGCTAC
FOXO1-KO-2-F	CACCGGTGGCGCAAACGAGTAGCA
FOXO1-KO-2-R	AAACTGCTACTCGTTTGCGCCACC
FOXO1-KO-3-F	CACCGGAGTTTAGCCAGTCCAACT
FOXO1-KO-3-R	AAACAGTTGGACTGGCTAAACTCC
FOXO3-KO-1-F	CACCGCCTGCCATATCAGTCAGCCG
FOXO3-KO-1-R	AAACCGGCTGACTGATATGGCAGGC
FOXO3-KO-2-F	CACCGCAGAGTGAGCCGTTTGTCCG
FOXO3-KO-2-R	AAACCGGACAAACGGCTCACTCTGC
FOXO3-KO-3-F	CACCGAACAAGTATACCAAGAGCCG
FOXO3-KO-3-R	AAACCGGCTCTTGGTATACTTGTTC
FOXO4-KO-1-F	CACCGTTCATCAAGGTTCACAACG
FOXO4-KO-1-R	AAACCGTTGTGAACCTTGATGAAC
FOXO4-KO-2-F	CACCGAGACCACTCCGAGATAGCA
FOXO4-KO-2-R	AAACTGCTATCTCGGAGTGGTCTC
FOXO4-KO-3-F	CACCGCACTTGCCCAGATCTACGAG
FOXO4-KO-3-R	AAACCTCGTAGATCTGGGCAAGTGC
NC1-F	CACCGATATACCGACTTAACACGGA
NC1-R	AAACTCCGTGTTAAGTCGGTATATC
