# Supplementary material for: The Virus-induced Upregulation of the miR-183/96/182 Cluster and the FoxO Family Protein Members are not Required for the Efficient Replication of HSV-1
Source: Preprints.org preprint supplement (doi:10.20944/preprints202205.0363.v1), 2022-05-26
Supplement: Supplementary file 5 [file Table S2.xlsx]

## Sheet: mock-all
Table S2: Human (hsa-) and herpes simplex virus 1 (hsv1-) mature miRNAs detected in mock samples, and at 8 h.p.i., and 18 h.p.i.
HFF mock - all miRNAs
name	unique reads	read count	read count (mult. map. adj.)	RPM (lib)	RPM (total)	coordinateString	RPM_adj (lib)	RPM_adj (total)
hsa-miR-21-5p	4161	7449016	7449016	364895	199401	17:hsa;hsa-mir-21,8,29,+	364895	199401
hsa-miR-100-5p	2137	1666323	1663381	81625.9	44605.5	11:hsa;hsa-mir-100,13,34,-	81481.8	44526.8
hsa-miR-143-3p	2349	1184192	1184192	58008.4	31699.4	5:hsa;hsa-mir-143,61,81,+	58008.4	31699.4
hsa-let-7i-5p	1692	932074	930680	45658.3	24950.5	12:hsa;hsa-let-7i,6,27,+	45590	24913.2
hsa-miR-199a-3p	2999	774532	259146	37941	20733.3	1:hsa;hsa-mir-199a-2,70,91,-	12694.5	6937.05
hsa-miR-199b-3p	2924	773323	257835	37881.7	20701	9:hsa;hsa-mir-199b,65,86,-	12630.2	6901.94
hsa-miR-199a-3p	2865	773254	257786	37878.4	20699.1	19:hsa;hsa-mir-199a-1,47,68,-	12627.8	6900.61
hsa-let-7f-5p	1071	643891	326726	31541.4	17236.2	X:hsa;hsa-let-7f-2,8,29,-	16004.9	8746.08
hsa-let-7f-5p	1011	633685	316552	31041.5	16963	9:hsa;hsa-let-7f-1,7,28,+	15506.5	8473.73
hsa-miR-26a-5p	1235	471336	235896	23088.7	12617.1	12:hsa;hsa-mir-26a-2,14,35,-	11555.5	6314.65
hsa-miR-26a-5p	1208	471002	235562	23072.3	12608.2	3:hsa;hsa-mir-26a-1,10,31,+	11539.2	6305.71
hsa-let-7a-5p	1034	446784	148923	21886	11959.9	22:hsa;hsa-let-7a-3,4,25,+	7295.08	3986.49
hsa-let-7a-5p	1020	446517	148650	21872.9	11952.7	9:hsa;hsa-let-7a-1,6,27,+	7281.7	3979.18
hsa-let-7a-5p	1014	446321	148448	21863.3	11947.5	11:hsa;hsa-let-7a-2,5,26,-	7271.81	3973.77
hsa-let-7g-5p	1093	407295	403092	19951.6	10902.8	3:hsa;hsa-let-7g,5,26,-	19745.7	10790.3
hsa-miR-199a-5p	1225	366710	183135	17963.5	9816.4	19:hsa;hsa-mir-199a-1,6,28,-	8970.99	4902.31
hsa-miR-199a-5p	1215	366702	183127	17963.1	9816.18	1:hsa;hsa-mir-199a-2,31,53,-	8970.6	4902.09
hsa-miR-30a-5p	1624	355932	355768	17435.6	9527.88	6:hsa;hsa-mir-30a,6,27,-	17427.6	9523.5
hsa-miR-222-3p	2446	355797	355797	17429	9524.27	X:hsa;hsa-mir-222,69,89,-	17429	9524.27
hsa-miR-22-3p	863	354269	354269	17354.1	9483.36	17:hsa;hsa-mir-22,53,74,-	17354.1	9483.36
hsa-miR-27b-3p	1380	340674	337176	16688.1	9119.44	9:hsa;hsa-mir-27b,61,81,+	16516.8	9025.82
hsa-miR-221-3p	2181	326757	326757	16006.4	8746.9	X:hsa;hsa-mir-221,65,87,-	16006.4	8746.9
hsa-miR-148a-3p	680	244051	243638	11955	6532.96	7:hsa;hsa-mir-148a,44,65,-	11934.8	6521.9
hsa-miR-29a-3p	1423	235426	235336	11532.5	6302.08	7:hsa;hsa-mir-29a,42,63,-	11528.1	6299.65
hsa-miR-27a-3p	1896	222050	218552	10877.3	5944.02	19:hsa;hsa-mir-27a,51,71,-	10705.9	5850.39
hsa-miR-30d-5p	1296	209519	209176	10263.4	5608.58	8:hsa;hsa-mir-30d,6,27,-	10246.6	5599.41
hsa-miR-24-3p	947	203019	102151	9945.02	5434.58	9:hsa;hsa-mir-24-1,44,65,+	5003.93	2734.46
hsa-miR-24-3p	884	201825	100957	9886.53	5402.62	19:hsa;hsa-mir-24-2,50,71,-	4945.45	2702.5
hsa-miR-125b-5p	1215	196664	102198	9633.72	5264.46	11:hsa;hsa-mir-125b-1,15,36,-	5006.21	2735.71
hsa-miR-125b-5p	1145	191018	96551.5	9357.14	5113.33	21:hsa;hsa-mir-125b-2,17,38,+	4729.64	2584.57
hsa-let-7b-5p	1388	186840	185627	9152.48	5001.49	22:hsa;hsa-let-7b,6,27,+	9093.08	4969.03
hsa-miR-199b-5p	885	139322	138366	6824.78	3729.49	9:hsa;hsa-mir-199b,26,48,-	6777.95	3703.9
hsa-miR-99b-5p	920	136234	136234	6673.51	3646.82	19:hsa;hsa-mir-99b,7,28,+	6673.51	3646.82
hsa-miR-423-3p	1991	130550	130550	6395.08	3494.67	17:hsa;hsa-mir-423,53,75,+	6395.08	3494.67
hsa-miR-127-3p	1480	130379	130379	6386.7	3490.09	14:hsa;hsa-mir-127,57,78,+	6386.7	3490.09
hsa-miR-7-5p	744	110234	37720.3	5399.89	2950.83	9:hsa;hsa-mir-7-1,24,46,-	1847.76	1009.73
hsa-miR-7-5p	734	109200	36686.8	5349.23	2923.16	15:hsa;hsa-mir-7-2,32,54,+	1797.13	982.063
hsa-miR-7-5p	702	109100	36586.8	5344.34	2920.48	19:hsa;hsa-mir-7-3,31,53,+	1792.23	979.386
hsa-miR-103a-3p	1063	104898	51937.3	5138.5	2808	20:hsa;hsa-mir-103a-2,48,70,+	2544.18	1390.3
hsa-miR-103a-3p	1030	104447	51487.3	5116.41	2795.92	5:hsa;hsa-mir-103a-1,48,70,-	2522.14	1378.26
hsa-miR-92a-3p	1135	93380	48870.7	4574.28	2499.67	13:hsa;hsa-mir-92a-1,48,69,+	2393.96	1308.21
hsa-miR-92a-3p	1070	90034	45524.7	4410.38	2410.1	X:hsa;hsa-mir-92a-2,48,69,-	2230.06	1218.64
hsa-miR-381-3p	528	83408	83408	4085.8	2232.73	14:hsa;hsa-mir-381,49,70,+	4085.8	2232.73
hsa-miR-152-3p	982	79987	79984.5	3918.22	2141.16	17:hsa;hsa-mir-152,54,74,-	3918.09	2141.09
hsa-miR-370-3p	725	66251	66251	3245.35	1773.46	14:hsa;hsa-mir-370,48,69,+	3245.35	1773.46
hsa-miR-125a-5p	786	64949	64949	3181.57	1738.61	19:hsa;hsa-mir-125a,15,38,+	3181.57	1738.61
hsa-miR-30e-5p	722	55249	55009	2706.41	1478.95	1:hsa;hsa-mir-30e,17,38,+	2694.65	1472.53
hsa-miR-191-5p	815	54054	54054	2647.87	1446.96	3:hsa;hsa-mir-191,16,38,-	2647.87	1446.96
hsa-miR-99a-5p	663	51909	48978	2542.8	1389.54	21:hsa;hsa-mir-99a,13,34,+	2399.22	1311.08
hsa-miR-218-5p	779	50761	26107	2486.56	1358.81	4:hsa;hsa-mir-218-1,25,45,+	1278.87	698.854
hsa-miR-218-5p	712	49359	24705	2417.88	1321.28	5:hsa;hsa-mir-218-2,25,45,-	1210.19	661.324
hsa-miR-101-3p	893	48699	24758.5	2385.55	1303.61	9:hsa;hsa-mir-101-2,49,69,+	1212.81	662.756
hsa-miR-101-3p	861	48040	24099.5	2353.27	1285.97	1:hsa;hsa-mir-101-1,47,67,-	1180.53	645.115
hsa-miR-148b-3p	642	46872	46458.5	2296.06	1254.71	12:hsa;hsa-mir-148b,63,84,+	2275.8	1243.64
hsa-miR-23a-3p	758	42851	42392.3	2099.08	1147.07	19:hsa;hsa-mir-23a,45,65,-	2076.62	1134.79
hsa-miR-221-5p	780	41635	41635	2039.52	1114.52	X:hsa;hsa-mir-221,25,46,-	2039.52	1114.52
hsa-miR-181a-5p	883	40271	20137.8	1972.7	1078.01	1:hsa;hsa-mir-181a-1,24,46,-	986.461	539.064
hsa-miR-181a-5p	876	40262	20128.8	1972.26	1077.77	9:hsa;hsa-mir-181a-2,39,61,+	986.02	538.823
hsa-miR-25-3p	636	38918	38916	1906.42	1041.79	7:hsa;hsa-mir-25,52,73,-	1906.33	1041.74
hsa-miR-4485-3p	819	38474	38474	1884.67	1029.9	11:hsa;hsa-mir-4485,31,50,-	1884.67	1029.9
hsa-let-7e-5p	539	37695	36929.6	1846.51	1009.05	19:hsa;hsa-let-7e,8,29,+	1809.02	988.561
hsa-miR-30c-5p	566	37580	18800.2	1840.88	1005.97	6:hsa;hsa-mir-30c-2,7,29,-	920.939	503.258
hsa-miR-30c-5p	556	37550	18770.2	1839.41	1005.17	1:hsa;hsa-mir-30c-1,17,39,+	919.469	502.455
hsa-miR-128-3p	593	35412	22081.5	1734.68	947.94	2:hsa;hsa-mir-128-1,50,70,+	1081.68	591.096
hsa-miR-379-5p	405	34060	34060	1668.45	911.75	14:hsa;hsa-mir-379,6,26,+	1668.45	911.746
hsa-miR-409-3p	974	33192	33192	1625.93	888.51	14:hsa;hsa-mir-409,47,68,+	1625.93	888.511
hsa-miR-26b-5p	439	30926	30921.3	1514.93	827.85	2:hsa;hsa-mir-26b,12,32,+	1514.7	827.728
hsa-miR-532-5p	443	28166	28166	1379.73	753.97	X:hsa;hsa-mir-532,20,41,+	1379.73	753.971
hsa-miR-455-5p	720	27977	27977	1370.47	748.91	9:hsa;hsa-mir-455,16,37,+	1370.47	748.911
hsa-miR-128-3p	463	27950	14619.5	1369.15	748.19	3:hsa;hsa-mir-128-2,52,72,+	716.146	391.347
hsa-miR-224-5p	488	25882	25882	1267.85	692.83	X:hsa;hsa-mir-224,8,28,-	1267.85	692.831
hsa-miR-411-5p	379	23080	23080	1130.59	617.82	14:hsa;hsa-mir-411,16,36,+	1130.59	617.824
hsa-miR-31-5p	583	22813	22813	1117.51	610.68	9:hsa;hsa-mir-31,8,28,-	1117.51	610.677
hsa-miR-151a-3p	1252	22285	22285	1091.65	596.54	8:hsa;hsa-mir-151a,47,67,-	1091.65	596.543
hsa-miR-140-3p	759	21990	21990	1077.19	588.65	16:hsa;hsa-mir-140,62,82,+	1077.19	588.646
hsa-miR-23b-3p	590	21460	21002.8	1051.23	574.46	9:hsa;hsa-mir-23b,58,78,+	1028.84	562.221
hsa-miR-1307-3p	743	21443	21443	1050.4	574	10:hsa;hsa-mir-1307,80,101,-	1050.4	574.004
hsa-miR-493-5p	267	20630	20630	1010.57	552.24	14:hsa;hsa-mir-493,16,37,+	1010.57	552.241
hsa-miR-654-3p	508	20603	20603	1009.25	551.52	14:hsa;hsa-mir-654,51,72,+	1009.25	551.518
hsa-miR-146b-5p	428	19798	19795.5	969.82	529.97	10:hsa;hsa-mir-146b,9,30,+	969.696	529.902
hsa-miR-155-5p	632	17548	17548	859.6	469.74	21:hsa;hsa-mir-155,4,26,+	859.6	469.739
hsa-miR-20a-5p	288	17390	17329.7	851.86	465.51	13:hsa;hsa-mir-20a,8,30,+	848.905	463.895
hsa-miR-34c-5p	371	17104	17100	837.85	457.85	11:hsa;hsa-mir-34c,13,35,+	837.655	457.747
hsa-miR-93-5p	442	17083	17083	836.82	457.29	7:hsa;hsa-mir-93,11,33,-	836.822	457.292
hsa-miR-423-5p	395	16685	16685	817.33	446.64	17:hsa;hsa-mir-423,17,39,+	817.326	446.638
hsa-let-7d-5p	324	16282	15282.1	797.58	435.85	9:hsa;hsa-let-7d,8,29,+	748.606	409.085
hsa-miR-214-3p	693	14655	14655	717.88	392.3	1:hsa;hsa-mir-214,71,92,-	717.885	392.297
hsa-miR-145-5p	348	14277	14277	699.37	382.18	5:hsa;hsa-mir-145,16,38,+	699.368	382.178
hsa-miR-125b-1-3p	573	13581	13581	665.27	363.55	11:hsa;hsa-mir-125b-1,55,76,-	665.274	363.547
hsa-miR-92b-3p	738	12781	12779.7	626.09	342.13	1:hsa;hsa-mir-92b,61,82,+	626.02	342.097
hsa-miR-30a-3p	443	12549	12540	614.72	335.92	6:hsa;hsa-mir-30a,47,68,-	614.28	335.681
hsa-miR-146a-5p	488	12385	12382.5	606.69	331.53	5:hsa;hsa-mir-146a,21,42,+	606.565	331.465
hsa-miR-16-5p	328	12169	6131.33	596.11	325.75	13:hsa;hsa-mir-16-1,14,35,-	300.347	164.129
hsa-miR-16-5p	332	12119	6081.33	593.66	324.41	3:hsa;hsa-mir-16-2,10,31,+	297.898	162.79
hsa-miR-98-5p	250	11769	11302.3	576.51	315.04	X:hsa;hsa-mir-98,22,43,-	553.651	302.55
hsa-miR-181b-5p	658	10745	5647.75	526.35	287.63	9:hsa;hsa-mir-181b-2,16,38,+	276.659	151.184
hsa-miR-192-5p	497	10741	10735	526.15	287.52	11:hsa;hsa-mir-192,24,44,-	525.861	287.363
hsa-miR-106b-3p	430	10382	10382	508.57	277.91	7:hsa;hsa-mir-106b,52,73,-	508.569	277.914
hsa-miR-181b-5p	614	10320	5222.75	505.53	276.25	1:hsa;hsa-mir-181b-1,36,58,-	255.84	139.807
hsa-miR-744-5p	264	9861	9861	483.05	263.97	17:hsa;hsa-mir-744,11,32,+	483.048	263.967
hsa-miR-196b-5p	318	9301	9295	455.62	248.98	7:hsa;hsa-mir-196b,15,36,-	455.322	248.816
hsa-miR-374b-5p	237	9271	9246	454.15	248.17	X:hsa;hsa-mir-374b,11,32,-	452.921	247.505
hsa-let-7c-5p	317	9270	7483.63	454.1	248.15	21:hsa;hsa-let-7c,11,32,+	366.591	200.328
hsa-miR-484	363	9028	9028	442.24	241.67	16:hsa;hsa-mir-484,8,29,+	442.243	241.669
hsa-let-7a-3p	298	9014	4573.42	441.56	241.29	9:hsa;hsa-let-7a-1,57,77,+	224.032	122.425
hsa-miR-21-3p	396	8894	8894	435.68	238.08	17:hsa;hsa-mir-21,46,66,+	435.678	238.082
hsa-let-7a-3p	268	8879	4438.42	434.94	237.68	22:hsa;hsa-let-7a-3,52,72,+	217.419	118.811
hsa-miR-34a-5p	413	8468	8468	414.81	226.68	1:hsa;hsa-mir-34a,22,43,-	414.811	226.678
hsa-miR-30e-3p	297	8346	8339.5	408.83	223.41	1:hsa;hsa-mir-30e,59,80,+	408.516	223.239
hsa-miR-17-5p	242	8326	8269.17	407.85	222.88	13:hsa;hsa-mir-17,14,36,+	405.071	221.356
hsa-miR-30b-5p	217	8137	8115.67	398.6	217.82	8:hsa;hsa-mir-30b,17,38,-	397.551	217.247
hsa-miR-494-3p	183	7828	7828	383.46	209.55	14:hsa;hsa-mir-494,48,69,+	383.46	209.546
hsa-miR-543	309	7763	7763	380.28	207.81	14:hsa;hsa-mir-543,47,68,+	380.276	207.806
hsa-miR-134-5p	451	7576	7576	371.12	202.8	14:hsa;hsa-mir-134,8,29,+	371.115	202.801
hsa-miR-769-5p	307	7475	7475	366.17	200.1	19:hsa;hsa-mir-769,30,51,+	366.168	200.097
hsa-miR-186-5p	312	7344	7344	359.75	196.59	1:hsa;hsa-mir-186,15,36,-	359.751	196.59
hsa-miR-361-3p	377	7316	7316	358.38	195.84	X:hsa;hsa-mir-361,45,67,-	358.379	195.841
hsa-miR-136-3p	232	6823	6823	334.23	182.64	14:hsa;hsa-mir-136,49,70,+	334.229	182.644
hsa-miR-107	373	6562	3314.33	321.44	175.66	10:hsa;hsa-mir-107,50,72,-	162.355	88.7208
hsa-miR-503-5p	434	6531	6531	319.93	174.83	X:hsa;hsa-mir-503,6,28,-	319.925	174.827
hsa-miR-145-3p	296	6444	6444	315.66	172.5	5:hsa;hsa-mir-145,54,75,+	315.664	172.498
hsa-miR-455-3p	296	6261	6261	306.7	167.6	9:hsa;hsa-mir-455,54,74,+	306.699	167.6
hsa-miR-99b-3p	411	5951	5951	291.51	159.3	19:hsa;hsa-mir-99b,45,66,+	291.514	159.301
hsa-miR-193a-5p	317	5861	5861	287.1	156.89	17:hsa;hsa-mir-193a,21,42,+	287.105	156.892
hsa-miR-424-3p	243	5695	5695	278.97	152.45	X:hsa;hsa-mir-424,48,68,-	278.973	152.448
hsa-miR-24-2-5p	266	5653	5652	276.92	151.32	19:hsa;hsa-mir-24-2,13,34,-	276.867	151.297
hsa-miR-16-2-3p	238	5276	5276	258.45	141.23	3:hsa;hsa-mir-16-2,53,74,+	258.448	141.232
hsa-miR-450a-5p	166	5266	2643	257.96	140.96	X:hsa;hsa-mir-450a-2,23,44,-	129.469	70.75
hsa-miR-450a-5p	161	5251	2628	257.22	140.56	X:hsa;hsa-mir-450a-1,18,39,-	128.734	70.3485
hsa-miR-452-5p	261	5132	5132	251.39	137.38	X:hsa;hsa-mir-452,14,35,-	251.394	137.378
hsa-miR-130b-5p	129	5079	5079	248.8	135.96	22:hsa;hsa-mir-130b,13,33,+	248.798	135.959
hsa-miR-382-5p	261	4958	4958	242.87	132.72	14:hsa;hsa-mir-382,11,32,+	242.871	132.72
hsa-miR-140-5p	128	4721	4721	231.26	126.38	16:hsa;hsa-mir-140,23,44,+	231.261	126.376
hsa-miR-323a-3p	178	4676	4671.5	229.06	125.17	14:hsa;hsa-mir-323a,51,71,+	228.837	125.051
hsa-miR-214-5p	186	4638	4638	227.2	124.15	1:hsa;hsa-mir-214,30,51,-	227.195	124.154
hsa-miR-29b-3p	213	4412	2197.17	216.12	118.1	1:hsa;hsa-mir-29b-2,52,74,-	107.63	58.8156
hsa-miR-1185-1-3p	153	4405	4288.5	215.78	117.92	14:hsa;hsa-mir-1185-1,53,74,+	210.075	114.798
hsa-miR-29b-3p	212	4403	2188.17	215.68	117.86	7:hsa;hsa-mir-29b-1,51,73,-	107.189	58.5746
hsa-miR-138-5p	294	4392	3110.5	215.15	117.57	3:hsa;hsa-mir-138-1,23,45,+	152.37	83.2644
hsa-miR-889-3p	173	4290	4290	210.15	114.84	14:hsa;hsa-mir-889,49,69,+	210.148	114.838
hsa-miR-450b-5p	120	4205	4205	205.98	112.56	X:hsa;hsa-mir-450b,11,32,-	205.985	112.563
hsa-miR-425-5p	281	4180	4180	204.76	111.89	3:hsa;hsa-mir-425,14,36,-	204.76	111.894
hsa-miR-365b-3p	140	4046	2023.5	198.2	108.31	17:hsa;hsa-mir-365b,68,89,+	99.1225	54.1667
hsa-miR-365a-3p	139	4045	2022.5	198.15	108.28	16:hsa;hsa-mir-365a,56,77,+	99.0735	54.1399
hsa-miR-654-5p	221	4041	4041	197.95	108.17	14:hsa;hsa-mir-654,16,37,+	197.951	108.173
hsa-miR-143-5p	227	4038	4038	197.8	108.09	5:hsa;hsa-mir-143,27,48,+	197.804	108.093
hsa-miR-22-5p	125	3970	3970	194.47	106.27	17:hsa;hsa-mir-22,15,36,-	194.473	106.272
hsa-miR-3615	301	3960	3960	193.98	106	17:hsa;hsa-mir-3615,51,71,+	193.983	106.005
hsa-miR-127-5p	252	3756	3756	183.99	100.54	14:hsa;hsa-mir-127,23,44,+	183.99	100.544
hsa-miR-382-3p	162	3681	3681	180.32	98.54	14:hsa;hsa-mir-382,47,67,+	180.316	98.536
hsa-miR-10b-5p	148	3529	3522.5	172.87	94.47	2:hsa;hsa-mir-10b,27,49,+	172.552	94.2932
hsa-miR-409-5p	170	3527	3527	172.77	94.41	14:hsa;hsa-mir-409,15,37,+	172.772	94.4136
hsa-miR-629-5p	150	3504	3504	171.65	93.8	15:hsa;hsa-mir-629,22,42,-	171.646	93.798
hsa-miR-660-5p	117	3425	3425	167.78	91.68	X:hsa;hsa-mir-660,16,37,+	167.776	91.6832
hsa-miR-542-3p	246	3353	3353	164.25	89.76	X:hsa;hsa-mir-542,53,74,-	164.249	89.7559
hsa-miR-181a-2-3p	143	3312	3312	162.24	88.66	9:hsa;hsa-mir-181a-2,77,98,+	162.241	88.6583
hsa-miR-181a-3p	155	3274	3267.5	160.38	87.64	1:hsa;hsa-mir-181a-1,64,85,-	160.061	87.4671
hsa-miR-126-3p	159	3150	3150	154.3	84.32	9:hsa;hsa-mir-126,52,73,+	154.305	84.3218
hsa-miR-495-3p	223	3063	3063	150.04	81.99	14:hsa;hsa-mir-495,50,71,+	150.043	81.9929
hsa-miR-320a	608	2981	2898.7	146.03	79.8	8:hsa;hsa-mir-320a,48,69,-	141.995	77.5948
hsa-miR-193b-3p	185	2963	2963	145.14	79.32	16:hsa;hsa-mir-193b,51,72,+	145.145	79.316
hsa-let-7d-3p	168	2920	2920	143.04	78.16	9:hsa;hsa-let-7d,62,83,+	143.038	78.165
hsa-miR-138-5p	225	2899	1617.5	142.01	77.6	16:hsa;hsa-mir-138-2,10,32,+	79.2343	43.2986
hsa-let-7b-3p	160	2850	2846.58	139.61	76.29	22:hsa;hsa-let-7b,60,81,+	139.442	76.1997
hsa-miR-758-3p	120	2845	2845	139.36	76.16	14:hsa;hsa-mir-758,52,73,+	139.364	76.1573
hsa-miR-15b-5p	108	2831	2830.5	138.68	75.78	3:hsa;hsa-mir-15b,20,41,+	138.654	75.7692
hsa-miR-411-3p	112	2693	2691.5	131.92	72.09	14:hsa;hsa-mir-411,51,72,+	131.845	72.0483
hsa-miR-210-3p	326	2674	2674	130.99	71.58	11:hsa;hsa-mir-210,66,87,-	130.988	71.5798
hsa-miR-500a-3p	194	2625	2280.17	128.59	70.27	X:hsa;hsa-mir-500a,52,73,+	111.695	61.0374
hsa-miR-196a-5p	124	2536	1491	124.23	67.89	12:hsa;hsa-mir-196a-2,25,46,+	73.0376	39.9123
hsa-miR-486-5p	172	2448	1365	119.92	65.53	8:hsa;hsa-mir-486-2,1,22,+	66.8654	36.5394
hsa-miR-424-5p	128	2404	2404	117.76	64.35	X:hsa;hsa-mir-424,11,32,-	117.762	64.3523
hsa-miR-32-5p	78	2386	2386	116.88	63.87	9:hsa;hsa-mir-32,6,27,-	116.88	63.8704
hsa-miR-625-3p	291	2346	2346	114.92	62.8	14:hsa;hsa-mir-625,52,73,+	114.92	62.7997
hsa-miR-106b-5p	154	2325	2325	113.89	62.24	7:hsa;hsa-mir-106b,12,32,-	113.892	62.2375
hsa-miR-374a-5p	102	2262	2252.5	110.81	60.55	X:hsa;hsa-mir-374a,12,33,-	110.34	60.2968
hsa-miR-486-5p	165	2248	1165	110.12	60.18	8:hsa;hsa-mir-486-1,4,25,-	57.0683	31.1857
hsa-miR-30c-2-3p	114	2247	2246	110.07	60.15	6:hsa;hsa-mir-30c-2,47,68,-	110.022	60.1228
hsa-miR-149-5p	151	2156	2156	105.61	57.71	2:hsa;hsa-mir-149,15,37,+	105.613	57.7136
hsa-miR-196a-5p	107	2139	1094	104.78	57.26	17:hsa;hsa-mir-196a-1,7,28,-	53.5903	29.2851
hsa-miR-19b-3p	111	2092	1059.83	102.48	56	X:hsa;hsa-mir-19b-2,62,84,-	51.9166	28.3705
hsa-miR-19b-3p	105	2068	1036.33	101.3	55.36	13:hsa;hsa-mir-19b-1,54,76,+	50.7655	27.7414
hsa-miR-615-3p	129	1980	1980	96.99	53	12:hsa;hsa-mir-615,61,82,+	96.9916	53.0023
hsa-miR-1180-3p	148	1953	1953	95.67	52.28	17:hsa;hsa-mir-1180,41,62,-	95.669	52.2795
hsa-miR-132-3p	137	1861	1861	91.16	49.82	17:hsa;hsa-mir-132,59,80,-	91.1623	49.8168
hsa-miR-330-3p	201	1836	1836	89.94	49.15	19:hsa;hsa-mir-330,57,79,-	89.9377	49.1476
hsa-miR-369-3p	80	1833	1833	89.79	49.07	14:hsa;hsa-mir-369,44,64,+	89.7907	49.0673
hsa-miR-181d-5p	207	1824	1822	89.35	48.83	19:hsa;hsa-mir-181d,36,58,+	89.2519	48.7728
hsa-miR-671-3p	197	1784	1784	87.39	47.76	7:hsa;hsa-mir-671,68,88,+	87.3904	47.7556
hsa-miR-339-3p	152	1765	1765	86.46	47.25	7:hsa;hsa-mir-339,50,72,-	86.4597	47.247
hsa-miR-125b-2-3p	153	1748	1748	85.63	46.79	21:hsa;hsa-mir-125b-2,54,75,+	85.6269	46.7919
hsa-miR-490-3p	144	1701	1701	83.32	45.53	7:hsa;hsa-mir-490,76,97,+	83.3246	45.5338
hsa-miR-3117-3p	186	1661	1661	81.37	44.46	1:hsa;hsa-mir-3117,46,66,+	81.3652	44.463
hsa-miR-1307-5p	127	1655	1655	81.07	44.3	10:hsa;hsa-mir-1307,41,61,-	81.0713	44.3024
hsa-miR-130a-3p	155	1641	1640	80.39	43.93	11:hsa;hsa-mir-130a,55,76,+	80.3365	43.9009
hsa-miR-329-3p	183	1605	802.5	78.62	42.96	14:hsa;hsa-mir-329-1,50,71,+	39.311	21.482
hsa-miR-329-3p	183	1605	802.5	78.62	42.96	14:hsa;hsa-mir-329-2,52,73,+	39.311	21.482
hsa-miR-369-5p	72	1552	1552	76.03	41.55	14:hsa;hsa-mir-369,9,30,+	76.0257	41.5452
hsa-miR-27a-5p	104	1511	1511	74.02	40.45	19:hsa;hsa-mir-27a,10,31,-	74.0173	40.4477
hsa-miR-345-5p	124	1496	1496	73.28	40.05	14:hsa;hsa-mir-345,18,39,+	73.2825	40.0462
hsa-miR-505-3p	126	1331	1331	65.2	35.63	X:hsa;hsa-mir-505,51,72,-	65.1999	35.6293
hsa-miR-299-3p	108	1324	1324	64.86	35.44	14:hsa;hsa-mir-299,39,60,+	64.857	35.4419
hsa-miR-7977	7	1322	1322	64.76	35.39	3:hsa;hsa-mir-7977,1,18,+	64.759	35.3884
hsa-miR-485-3p	137	1321	1321	64.71	35.36	14:hsa;hsa-mir-485,46,67,+	64.7101	35.3616
hsa-miR-487b-3p	111	1320	1320	64.66	35.33	14:hsa;hsa-mir-487b,51,72,+	64.6611	35.3348
hsa-miR-331-3p	104	1319	1319	64.61	35.31	12:hsa;hsa-mir-331,61,81,+	64.6121	35.3081
hsa-miR-1287-5p	95	1304	1304	63.88	34.91	10:hsa;hsa-mir-1287,16,37,-	63.8773	34.9065
hsa-miR-136-5p	95	1291	1291	63.24	34.56	14:hsa;hsa-mir-136,15,37,+	63.2405	34.5586
hsa-miR-502-3p	117	1289	945.17	63.14	34.51	X:hsa;hsa-mir-502,52,73,+	46.2996	25.301
hsa-miR-432-5p	132	1260	1260	61.72	33.73	14:hsa;hsa-mir-432,14,36,+	61.7219	33.7287
hsa-miR-410-3p	73	1237	1237	60.6	33.11	14:hsa;hsa-mir-410,50,70,+	60.5953	33.113
hsa-miR-129-5p	86	1204	604	58.98	32.23	7:hsa;hsa-mir-129-1,5,25,+	29.5873	16.1684
hsa-miR-129-5p	85	1202	602	58.88	32.18	11:hsa;hsa-mir-129-2,15,35,+	29.4894	16.1148
hsa-miR-7974	67	1139	1139	55.79	30.49	19:hsa;hsa-mir-7974,56,79,-	55.7947	30.4897
hsa-miR-539-3p	96	1133	1133	55.5	30.33	14:hsa;hsa-mir-539,49,70,+	55.5008	30.3291
hsa-miR-589-5p	76	1128	1128	55.26	30.2	7:hsa;hsa-mir-589,24,45,-	55.2558	30.1952
hsa-miR-323b-3p	65	1122	1117.5	54.96	30.03	14:hsa;hsa-mir-323b,51,72,+	54.7415	29.9142
hsa-miR-501-3p	94	1086	1083.17	53.2	29.07	X:hsa;hsa-mir-501,51,72,+	53.0596	28.9951
hsa-miR-1296-5p	131	1069	1069	52.37	28.62	10:hsa;hsa-mir-1296,16,37,-	52.3657	28.6159
hsa-miR-454-3p	96	1064	1064	52.12	28.48	17:hsa;hsa-mir-454,64,86,-	52.1207	28.482
hsa-let-7i-3p	60	1063	1063	52.07	28.46	12:hsa;hsa-let-7i,62,83,+	52.0718	28.4553
hsa-miR-433-3p	121	1062	1062	52.02	28.43	14:hsa;hsa-mir-433,64,85,+	52.0228	28.4285
hsa-miR-19a-3p	97	1035	1033.83	50.7	27.71	13:hsa;hsa-mir-19a,49,71,+	50.643	27.6745
hsa-miR-425-3p	148	1029	1029	50.41	27.55	3:hsa;hsa-mir-425,55,76,-	50.4062	27.5451
hsa-miR-5100	6	976	976	47.81	26.13	10:hsa;hsa-mir-5100,68,89,+	47.81	26.1264
hsa-miR-4521	187	971	971	47.57	25.99	17:hsa;hsa-mir-4521,4,25,+	47.5651	25.9925
hsa-miR-342-3p	100	966	966	47.32	25.86	14:hsa;hsa-mir-342,61,83,+	47.3201	25.8587
hsa-miR-296-3p	133	945	945	46.29	25.3	20:hsa;hsa-mir-296,48,69,-	46.2914	25.2965
hsa-miR-485-5p	89	903	903	44.23	24.17	14:hsa;hsa-mir-485,9,30,+	44.2341	24.1722
hsa-miR-377-3p	65	888	888	43.5	23.77	14:hsa;hsa-mir-377,45,66,+	43.4993	23.7707
hsa-miR-15b-3p	71	886	886	43.4	23.72	3:hsa;hsa-mir-15b,58,79,+	43.4013	23.7172
hsa-miR-27b-5p	82	882	882	43.21	23.61	9:hsa;hsa-mir-27b,19,40,+	43.2054	23.6101
hsa-miR-7706	106	876	876	42.91	23.45	15:hsa;hsa-mir-7706,44,67,+	42.9114	23.4495
hsa-miR-181c-3p	82	876	869.5	42.91	23.45	19:hsa;hsa-mir-181c,65,86,+	42.593	23.2755
hsa-miR-671-5p	124	872	872	42.72	23.34	7:hsa;hsa-mir-671,29,51,+	42.7155	23.3424
hsa-miR-376c-3p	73	867	865	42.47	23.21	14:hsa;hsa-mir-376c,43,63,+	42.3726	23.155
hsa-miR-148b-5p	88	843	843	41.29	22.57	12:hsa;hsa-mir-148b,25,46,+	41.2949	22.5661
hsa-miR-132-5p	63	789	789	38.65	21.12	17:hsa;hsa-mir-132,23,44,-	38.6497	21.1206
hsa-miR-656-3p	44	769	769	37.67	20.59	14:hsa;hsa-mir-656,43,63,+	37.67	20.5852
hsa-let-7f-2-3p	57	757	754.33	37.08	20.26	X:hsa;hsa-let-7f-2,58,79,-	36.9515	20.1926
hsa-miR-1185-2-3p	107	753	636.5	36.89	20.16	14:hsa;hsa-mir-1185-2,53,74,+	31.1794	17.0384
hsa-miR-1278	62	734	734	35.96	19.65	1:hsa;hsa-mir-1278,50,71,+	35.9555	19.6483
hsa-miR-362-5p	70	732	732	35.86	19.59	X:hsa;hsa-mir-362,5,28,+	35.8575	19.5948
hsa-miR-185-3p	69	727	727	35.61	19.46	22:hsa;hsa-mir-185,50,71,+	35.6126	19.4609
hsa-miR-148a-5p	56	724	724	35.47	19.38	7:hsa;hsa-mir-148a,6,27,-	35.4656	19.3806
hsa-miR-549a	72	710	710	34.78	19.01	15:hsa;hsa-mir-549a,61,81,-	34.7798	19.0059
hsa-miR-337-3p	76	705	705	34.53	18.87	14:hsa;hsa-mir-337,61,82,+	34.5349	18.872
hsa-miR-598-3p	81	705	705	34.53	18.87	8:hsa;hsa-mir-598,61,82,-	34.5349	18.872
hsa-miR-196a-3p	38	692	692	33.9	18.52	12:hsa;hsa-mir-196a-2,62,83,+	33.8981	18.524
hsa-miR-31-3p	73	665	665	32.58	17.8	9:hsa;hsa-mir-31,44,65,-	32.5755	17.8013
hsa-miR-3909	72	643	643	31.5	17.21	22:hsa;hsa-mir-3909,71,92,+	31.4978	17.2124
hsa-miR-212-5p	65	625	625	30.62	16.73	17:hsa;hsa-mir-212,31,53,-	30.616	16.7305
hsa-miR-340-3p	60	619	619	30.32	16.57	5:hsa;hsa-mir-340,58,79,-	30.3221	16.5699
hsa-miR-15a-5p	80	612	611.5	29.98	16.38	13:hsa;hsa-mir-15a,14,35,-	29.9547	16.3691
hsa-miR-152-5p	67	611	611	29.93	16.36	17:hsa;hsa-mir-152,16,38,-	29.9302	16.3558
hsa-miR-379-3p	35	595	593.5	29.15	15.93	14:hsa;hsa-mir-379,44,65,+	29.073	15.8873
hsa-miR-874-3p	69	588	588	28.8	15.74	5:hsa;hsa-mir-874,47,68,-	28.8036	15.7401
hsa-miR-92b-5p	80	580	580	28.41	15.53	1:hsa;hsa-mir-92b,20,41,+	28.4117	15.5259
hsa-miR-1301-3p	96	571	571	27.97	15.28	2:hsa;hsa-mir-1301,48,71,-	27.9708	15.285
hsa-miR-7704	25	571	571	27.97	15.28	2:hsa;hsa-mir-7704,1,19,+	27.9708	15.285
hsa-miR-194-5p	56	562	349	27.53	15.04	11:hsa;hsa-mir-194-2,15,36,-	17.096	9.34232
hsa-let-7f-1-3p	74	550	547.25	26.94	14.72	9:hsa;hsa-let-7f-1,63,84,+	26.8074	14.6492
hsa-miR-3607-3p	78	521	521	25.52	13.95	5:hsa;hsa-mir-3607,51,70,+	25.5215	13.9466
hsa-miR-376a-3p	56	520	260	25.47	13.92	14:hsa;hsa-mir-376a-2,50,70,+	12.7363	6.95989
hsa-miR-204-5p	42	520	519	25.47	13.92	9:hsa;hsa-mir-204,33,54,-	25.4236	13.893
hsa-miR-376a-3p	55	519	259	25.42	13.89	14:hsa;hsa-mir-376a-1,44,64,+	12.6873	6.93313
hsa-miR-3158-3p	50	518	259	25.37	13.87	10:hsa;hsa-mir-3158-1,50,71,+	12.6873	6.93313
hsa-miR-3158-3p	50	518	259	25.37	13.87	10:hsa;hsa-mir-3158-2,50,71,-	12.6873	6.93313
hsa-miR-4677-3p	39	516	516	25.28	13.81	1:hsa;hsa-mir-4677,50,71,+	25.2766	13.8127
hsa-miR-421	75	510	510	24.98	13.65	X:hsa;hsa-mir-421,48,70,-	24.9827	13.6521
hsa-miR-330-5p	62	504	504	24.69	13.49	19:hsa;hsa-mir-330,18,39,-	24.6888	13.4915
hsa-miR-431-3p	118	487	487	23.86	13.04	14:hsa;hsa-mir-431,63,84,+	23.856	13.0364
hsa-miR-1304-3p	31	487	487	23.86	13.04	11:hsa;hsa-mir-1304,53,74,-	23.856	13.0364
hsa-miR-431-5p	60	486	486	23.81	13.01	14:hsa;hsa-mir-431,20,40,+	23.807	13.0096
hsa-miR-194-5p	45	476	263	23.32	12.74	1:hsa;hsa-mir-194-1,15,36,-	12.8832	7.0402
hsa-miR-29c-3p	83	474	444.17	23.22	12.69	1:hsa;hsa-mir-29c,54,75,-	21.7578	11.8898
hsa-miR-582-3p	49	456	456	22.34	12.21	5:hsa;hsa-mir-582,53,74,-	22.3375	12.2066
hsa-let-7e-3p	59	448	446	21.95	11.99	19:hsa;hsa-let-7e,53,74,+	21.8476	11.9389
hsa-miR-222-5p	111	444	444	21.75	11.89	X:hsa;hsa-mir-222,31,52,-	21.7496	11.8854
hsa-miR-18a-5p	40	430	426.5	21.06	11.51	13:hsa;hsa-mir-18a,6,28,+	20.8924	11.4169
hsa-miR-125a-3p	74	429	429	21.01	11.48	19:hsa;hsa-mir-125a,53,74,+	21.0148	11.4838
hsa-miR-655-3p	44	415	415	20.33	11.11	14:hsa;hsa-mir-655,61,82,+	20.329	11.1091
hsa-miR-340-5p	106	413	413	20.23	11.06	5:hsa;hsa-mir-340,16,37,-	20.2311	11.0555
hsa-miR-1-3p	32	411	219	20.13	11	18:hsa;hsa-mir-1-2,53,74,-	10.7279	5.86237
hsa-miR-652-3p	60	411	411	20.13	11	X:hsa;hsa-mir-652,61,81,+	20.1331	11.002
hsa-miR-185-5p	142	393	393	19.25	10.52	22:hsa;hsa-mir-185,15,36,+	19.2514	10.5201
hsa-miR-1-3p	35	392	200	19.2	10.49	20:hsa;hsa-mir-1-1,46,67,+	9.79713	5.35376
hsa-miR-25-5p	34	391	391	19.15	10.47	7:hsa;hsa-mir-25,14,34,-	19.1534	10.4666
hsa-miR-30d-3p	71	389	385.5	19.06	10.41	8:hsa;hsa-mir-30d,46,67,-	18.884	10.3194
hsa-miR-299-5p	51	373	373	18.27	9.98	14:hsa;hsa-mir-299,7,28,+	18.2717	9.98477
hsa-miR-651-5p	45	364	364	17.83	9.74	X:hsa;hsa-mir-651,16,37,+	17.8308	9.74385
hsa-miR-130b-3p	63	361	360	17.68	9.66	22:hsa;hsa-mir-130b,51,72,+	17.6348	9.63678
hsa-miR-493-3p	130	354	354	17.34	9.48	14:hsa;hsa-mir-493,57,78,+	17.3409	9.47616
hsa-miR-181c-5p	60	349	349	17.1	9.34	19:hsa;hsa-mir-181c,27,48,+	17.096	9.34232
hsa-miR-365a-5p	80	349	349	17.1	9.34	16:hsa;hsa-mir-365a,16,38,+	17.096	9.34232
hsa-miR-10a-5p	54	342	324.5	16.75	9.15	17:hsa;hsa-mir-10a,22,44,-	15.8958	8.68648
hsa-miR-365b-5p	81	332	332	16.26	8.89	17:hsa;hsa-mir-365b,29,50,+	16.2632	8.88725
hsa-miR-532-3p	30	306	306	14.99	8.19	X:hsa;hsa-mir-532,57,78,+	14.9896	8.19126
hsa-miR-2277-5p	38	304	304	14.89	8.14	5:hsa;hsa-mir-2277,18,41,-	14.8916	8.13772
hsa-miR-877-5p	64	299	299	14.65	8	6:hsa;hsa-mir-877,1,20,+	14.6467	8.00388
hsa-miR-147b	63	293	293	14.35	7.84	15:hsa;hsa-mir-147b,49,70,+	14.3528	7.84327
hsa-miR-193b-5p	58	291	291	14.25	7.79	16:hsa;hsa-mir-193b,14,35,+	14.2548	7.78973
hsa-miR-337-5p	43	281	281	13.76	7.52	14:hsa;hsa-mir-337,23,43,+	13.765	7.52204
hsa-miR-182-5p	40	277	277	13.57	7.41	7:hsa;hsa-mir-182,23,46,-	13.569	7.41496
hsa-miR-486-3p	33	270	149.5	13.23	7.23	8:hsa;hsa-mir-486-1,46,66,-	7.32336	4.00194
hsa-miR-1197	22	270	270	13.23	7.23	14:hsa;hsa-mir-1197,57,77,+	13.2261	7.22758
hsa-miR-941	115	267	15.71	13.08	7.15	20:hsa;hsa-mir-941-4,47,69,+	0.769363	0.420428
hsa-miR-941	115	267	15.71	13.08	7.15	20:hsa;hsa-mir-941-5,47,69,+	0.769363	0.420428
hsa-miR-941	115	267	15.71	13.08	7.15	20:hsa;hsa-mir-941-2,47,69,+	0.769363	0.420428
hsa-miR-146b-3p	42	267	267	13.08	7.15	10:hsa;hsa-mir-146b,45,66,+	13.0792	7.14728
hsa-miR-941	115	267	15.71	13.08	7.15	20:hsa;hsa-mir-941-5,47,69,+	0.769363	0.420428
hsa-miR-941	115	267	15.71	13.08	7.15	20:hsa;hsa-mir-941-3,47,69,+	0.769363	0.420428
hsa-miR-941	115	267	15.71	13.08	7.15	20:hsa;hsa-mir-941-5,47,69,+	0.769363	0.420428
hsa-miR-941	115	267	15.71	13.08	7.15	20:hsa;hsa-mir-941-3,47,69,+	0.769363	0.420428
hsa-miR-941	115	267	15.71	13.08	7.15	20:hsa;hsa-mir-941-4,47,69,+	0.769363	0.420428
hsa-miR-941	115	267	15.71	13.08	7.15	20:hsa;hsa-mir-941-2,47,69,+	0.769363	0.420428
hsa-miR-941	115	267	15.71	13.08	7.15	20:hsa;hsa-mir-941-3,47,69,+	0.769363	0.420428
hsa-miR-941	115	267	15.71	13.08	7.15	20:hsa;hsa-mir-941-2,47,69,+	0.769363	0.420428
hsa-miR-941	115	267	15.71	13.08	7.15	20:hsa;hsa-mir-941-5,47,69,+	0.769363	0.420428
hsa-miR-941	115	267	15.71	13.08	7.15	20:hsa;hsa-mir-941-2,47,69,+	0.769363	0.420428
hsa-miR-941	115	267	15.71	13.08	7.15	20:hsa;hsa-mir-941-3,47,69,+	0.769363	0.420428
hsa-miR-941	115	267	15.71	13.08	7.15	20:hsa;hsa-mir-941-1,47,69,+	0.769363	0.420428
hsa-miR-941	115	267	15.71	13.08	7.15	20:hsa;hsa-mir-941-4,47,69,+	0.769363	0.420428
hsa-miR-941	115	267	15.71	13.08	7.15	20:hsa;hsa-mir-941-4,47,69,+	0.769363	0.420428
hsa-miR-2110	44	265	265	12.98	7.09	10:hsa;hsa-mir-2110,8,29,-	12.9812	7.09374
hsa-miR-301a-5p	32	265	265	12.98	7.09	17:hsa;hsa-mir-301a,14,35,-	12.9812	7.09374
hsa-miR-324-5p	41	263	263	12.88	7.04	17:hsa;hsa-mir-324,16,38,-	12.8832	7.0402
hsa-miR-215-5p	29	262	256	12.83	7.01	1:hsa;hsa-mir-215,27,47,-	12.5403	6.85282
hsa-miR-193a-3p	33	248	248	12.15	6.64	17:hsa;hsa-mir-193a,55,76,+	12.1484	6.63867
hsa-miR-29b-1-5p	54	248	246.5	12.15	6.64	7:hsa;hsa-mir-29b-1,10,33,-	12.075	6.59852
hsa-miR-4473	40	246	246	12.05	6.59	9:hsa;hsa-mir-4473,57,78,-	12.0505	6.58513
hsa-miR-486-3p	29	242	121.5	11.85	6.48	8:hsa;hsa-mir-486-2,43,63,+	5.95176	3.25241
hsa-miR-2355-3p	53	240	240	11.76	6.42	2:hsa;hsa-mir-2355,54,75,-	11.7566	6.42452
hsa-miR-374b-3p	38	234	233.5	11.46	6.26	X:hsa;hsa-mir-374b,41,62,-	11.4382	6.25052
hsa-miR-200b-3p	28	232	232	11.36	6.21	1:hsa;hsa-mir-200b,57,78,+	11.3647	6.21037
hsa-miR-331-5p	69	230	230	11.27	6.16	12:hsa;hsa-mir-331,26,47,+	11.2667	6.15683
hsa-miR-641	41	229	229	11.22	6.13	19:hsa;hsa-mir-641,16,39,-	11.2177	6.13006
hsa-miR-377-5p	30	229	229	11.22	6.13	14:hsa;hsa-mir-377,7,28,+	11.2177	6.13006
hsa-miR-487a-3p	32	228	228	11.17	6.1	14:hsa;hsa-mir-487a,49,70,+	11.1687	6.10329
hsa-miR-93-3p	59	221	221	10.83	5.92	7:hsa;hsa-mir-93,50,71,-	10.8258	5.91591
hsa-miR-29a-5p	47	220	220	10.78	5.89	7:hsa;hsa-mir-29a,4,25,-	10.7768	5.88914
hsa-miR-454-5p	22	219	219	10.73	5.86	17:hsa;hsa-mir-454,24,45,-	10.7279	5.86237
hsa-miR-561-5p	23	217	217	10.63	5.81	2:hsa;hsa-mir-561,26,47,+	10.6299	5.80883
hsa-miR-24-1-5p	40	206	205	10.09	5.51	9:hsa;hsa-mir-24-1,7,28,+	10.0421	5.48761
hsa-miR-5010-3p	32	206	206	10.09	5.51	17:hsa;hsa-mir-5010,80,101,+	10.091	5.51438
hsa-miR-664a-3p	24	206	206	10.09	5.51	1:hsa;hsa-mir-664a,49,71,-	10.091	5.51438
hsa-miR-32-3p	23	206	206	10.09	5.51	9:hsa;hsa-mir-32,47,68,-	10.091	5.51438
hsa-miR-138-1-3p	50	202	202	9.9	5.41	3:hsa;hsa-mir-138-1,63,84,+	9.8951	5.4073
hsa-miR-1248	47	201	201	9.85	5.38	3:hsa;hsa-mir-1248,4,30,+	9.84612	5.38053
hsa-miR-17-3p	46	200	200	9.8	5.35	13:hsa;hsa-mir-17,51,72,+	9.79713	5.35376
hsa-miR-2682-5p	38	199	199	9.75	5.33	1:hsa;hsa-mir-2682,23,45,-	9.74815	5.327
hsa-miR-9-5p	34	197	66.33	9.65	5.27	15:hsa;hsa-mir-9-3,16,38,+	3.24938	1.77567
hsa-miR-9-5p	33	196	65.33	9.6	5.25	5:hsa;hsa-mir-9-2,16,38,-	3.2004	1.7489
hsa-miR-9-5p	33	196	65.33	9.6	5.25	1:hsa;hsa-mir-9-1,16,38,-	3.2004	1.7489
hsa-miR-29c-5p	45	187	187	9.16	5.01	1:hsa;hsa-mir-29c,16,37,-	9.16032	5.00577
hsa-miR-4461	100	187	187	9.16	5.01	5:hsa;hsa-mir-4461,46,68,+	9.16032	5.00577
hsa-miR-499a-5p	24	186	186	9.11	4.98	20:hsa;hsa-mir-499a,33,53,+	9.11133	4.979
hsa-miR-33a-5p	23	185	184.5	9.06	4.95	22:hsa;hsa-mir-33a,6,26,+	9.03785	4.93885
hsa-miR-574-3p	89	180	180	8.82	4.82	4:hsa;hsa-mir-574,61,82,+	8.81742	4.81839
hsa-miR-320b	77	179	66.87	8.77	4.79	1:hsa;hsa-mir-320b-1,39,60,+	3.27559	1.78998
hsa-miR-320b	77	179	66.37	8.77	4.79	1:hsa;hsa-mir-320b-2,72,93,-	3.25109	1.7766
hsa-miR-34c-3p	37	178	178	8.72	4.76	11:hsa;hsa-mir-34c,46,67,+	8.71945	4.76485
hsa-miR-539-5p	28	176	176	8.62	4.71	14:hsa;hsa-mir-539,9,30,+	8.62148	4.71131
hsa-miR-3176	48	171	171	8.38	4.58	16:hsa;hsa-mir-3176,60,78,+	8.37655	4.57747
hsa-miR-154-5p	24	170	170	8.33	4.55	14:hsa;hsa-mir-154,15,36,+	8.32756	4.5507
hsa-miR-34b-3p	36	169	169	8.28	4.52	11:hsa;hsa-mir-34b,50,71,+	8.27858	4.52393
hsa-miR-7976	18	168	168	8.23	4.5	3:hsa;hsa-mir-7976,1,19,-	8.22959	4.49716
hsa-miR-23b-5p	38	168	168	8.23	4.5	9:hsa;hsa-mir-23b,20,41,+	8.22959	4.49716
hsa-miR-585-3p	35	167	167	8.18	4.47	5:hsa;hsa-mir-585,61,79,-	8.18061	4.47039
hsa-miR-18a-3p	39	162	161.5	7.94	4.34	13:hsa;hsa-mir-18a,47,69,+	7.91118	4.32317
hsa-miR-550a-5p	51	162	78.7	7.94	4.34	7:hsa;hsa-mir-550a-1,22,44,+	3.85517	2.10671
hsa-miR-584-5p	74	162	162	7.94	4.34	5:hsa;hsa-mir-584,16,37,-	7.93568	4.33655
hsa-miR-550a-5p	51	162	78.7	7.94	4.34	7:hsa;hsa-mir-550a-2,22,44,+	3.85517	2.10671
hsa-miR-887-3p	56	161	161	7.89	4.31	5:hsa;hsa-mir-887,48,69,+	7.88669	4.30978
hsa-miR-7-1-3p	28	160	160	7.84	4.28	9:hsa;hsa-mir-7-1,66,87,-	7.83771	4.28301
hsa-miR-374a-3p	76	160	160	7.84	4.28	X:hsa;hsa-mir-374a,42,63,-	7.83771	4.28301
hsa-miR-1306-5p	32	159	159	7.79	4.26	22:hsa;hsa-mir-1306,15,36,+	7.78872	4.25624
hsa-miR-942-5p	40	156	156	7.64	4.18	1:hsa;hsa-mir-942,13,34,+	7.64176	4.17594
hsa-miR-380-5p	19	150	150	7.35	4.02	14:hsa;hsa-mir-380,5,26,+	7.34785	4.01532
hsa-miR-296-5p	19	148	148	7.25	3.96	20:hsa;hsa-mir-296,14,34,-	7.24988	3.96179
hsa-miR-30c-1-3p	37	146	145	7.15	3.91	1:hsa;hsa-mir-30c-1,56,77,+	7.10292	3.88148
hsa-miR-3129-3p	46	144	144	7.05	3.85	2:hsa;hsa-mir-3129,47,68,-	7.05394	3.85471
hsa-miR-760	31	144	144	7.05	3.85	1:hsa;hsa-mir-760,49,68,+	7.05394	3.85471
hsa-miR-370-5p	35	143	143	7	3.83	14:hsa;hsa-mir-370,13,34,+	7.00495	3.82794
hsa-miR-887-5p	45	139	139	6.81	3.72	5:hsa;hsa-mir-887,10,30,+	6.80901	3.72087
hsa-miR-1260b	10	139	139	6.81	3.72	11:hsa;hsa-mir-1260b,10,28,+	6.80901	3.72087
hsa-miR-3928-3p	26	135	135	6.61	3.61	22:hsa;hsa-mir-3928,37,58,-	6.61306	3.61379
hsa-miR-224-3p	30	134	134	6.56	3.59	X:hsa;hsa-mir-224,53,75,-	6.56408	3.58702
hsa-miR-154-3p	20	133	133	6.52	3.56	14:hsa;hsa-mir-154,51,72,+	6.51509	3.56025
hsa-miR-137	39	130	130	6.37	3.48	1:hsa;hsa-mir-137,59,81,-	6.36814	3.47995
hsa-miR-501-5p	23	127	127	6.22	3.4	X:hsa;hsa-mir-501,14,35,+	6.22118	3.39964
hsa-miR-625-5p	16	127	127	6.22	3.4	14:hsa;hsa-mir-625,15,35,+	6.22118	3.39964
hsa-miR-1292-5p	48	127	127	6.22	3.4	20:hsa;hsa-mir-1292,3,27,+	6.22118	3.39964
hsa-let-7a-2-3p	30	125	122.5	6.12	3.35	11:hsa;hsa-let-7a-2,50,71,-	6.00074	3.27918
hsa-miR-744-3p	20	122	122	5.98	3.27	17:hsa;hsa-mir-744,68,89,+	5.97625	3.2658
hsa-miR-188-5p	22	122	122	5.98	3.27	X:hsa;hsa-mir-188,15,35,+	5.97625	3.2658
hsa-miR-200c-3p	23	122	122	5.98	3.27	12:hsa;hsa-mir-200c,44,66,+	5.97625	3.2658
hsa-miR-3687	74	121	15.12	5.93	3.24	KI270733.1:hsa;hsa-mir-3687-2,35,58,+	0.740908	0.404878
hsa-miR-3687	74	121	15.12	5.93	3.24	21:hsa;hsa-mir-3687-2,35,58,+	0.740908	0.404878
hsa-miR-3687	74	121	15.12	5.93	3.24	21:hsa;hsa-mir-3687-1,35,58,+	0.740908	0.404878
hsa-miR-3687	74	121	15.12	5.93	3.24	KI270733.1:hsa;hsa-mir-3687-2,35,58,+	0.740908	0.404878
hsa-miR-3687	74	121	15.12	5.93	3.24	KI270733.1:hsa;hsa-mir-3687-1,35,58,+	0.740908	0.404878
hsa-miR-3687	74	121	15.12	5.93	3.24	21:hsa;hsa-mir-3687-2,35,58,+	0.740908	0.404878
hsa-miR-3687	74	121	15.12	5.93	3.24	21:hsa;hsa-mir-3687-1,35,58,+	0.740908	0.404878
hsa-miR-3687	74	121	15.12	5.93	3.24	KI270733.1:hsa;hsa-mir-3687-1,35,58,+	0.740908	0.404878
hsa-miR-183-5p	24	119	119	5.83	3.19	7:hsa;hsa-mir-183,27,48,-	5.82929	3.18549
hsa-miR-4746-5p	19	119	119	5.83	3.19	19:hsa;hsa-mir-4746,10,32,+	5.82929	3.18549
hsa-miR-1249-3p	21	115	115	5.63	3.08	22:hsa;hsa-mir-1249,41,62,-	5.63335	3.07841
hsa-miR-3177-3p	23	115	115	5.63	3.08	16:hsa;hsa-mir-3177,54,74,+	5.63335	3.07841
hsa-miR-126-5p	25	113	113	5.54	3.02	9:hsa;hsa-mir-126,15,35,+	5.53538	3.02488
hsa-miR-212-3p	34	111	111	5.44	2.97	17:hsa;hsa-mir-212,71,91,-	5.43741	2.97134
hsa-miR-1260a	12	110	110	5.39	2.94	14:hsa;hsa-mir-1260a,14,31,+	5.38842	2.94457
hsa-miR-195-5p	24	106	101.33	5.19	2.84	17:hsa;hsa-mir-195,15,35,-	4.96388	2.71257
hsa-miR-450a-2-3p	23	92	92	4.51	2.46	X:hsa;hsa-mir-450a-2,58,79,-	4.50668	2.46273
hsa-miR-6720-3p	21	92	92	4.51	2.46	6:hsa;hsa-mir-6720,67,88,-	4.50668	2.46273
hsa-miR-29b-2-5p	29	92	90.5	4.51	2.46	1:hsa;hsa-mir-29b-2,11,32,-	4.4332	2.42258
hsa-miR-3912-3p	20	91	91	4.46	2.44	5:hsa;hsa-mir-3912,63,83,-	4.4577	2.43596
hsa-miR-191-3p	27	90	90	4.41	2.41	3:hsa;hsa-mir-191,58,79,-	4.40871	2.40919
hsa-miR-769-3p	24	88	88	4.31	2.36	19:hsa;hsa-mir-769,69,91,+	4.31074	2.35566
hsa-miR-361-5p	55	88	88	4.31	2.36	X:hsa;hsa-mir-361,6,27,-	4.31074	2.35566
hsa-miR-335-3p	34	88	88	4.31	2.36	7:hsa;hsa-mir-335,52,73,+	4.31074	2.35566
hsa-miR-197-3p	40	88	88	4.31	2.36	1:hsa;hsa-mir-197,48,69,+	4.31074	2.35566
hsa-miR-3605-3p	30	87	87	4.26	2.33	1:hsa;hsa-mir-3605,66,88,-	4.26175	2.32889
hsa-miR-342-5p	35	86	86	4.21	2.3	14:hsa;hsa-mir-342,19,39,+	4.21277	2.30212
hsa-miR-26b-3p	20	85	85	4.16	2.28	2:hsa;hsa-mir-26b,47,68,+	4.16378	2.27535
hsa-miR-3940-3p	27	85	85	4.16	2.28	19:hsa;hsa-mir-3940,57,78,-	4.16378	2.27535
hsa-miR-3661	22	85	85	4.16	2.28	5:hsa;hsa-mir-3661,21,42,+	4.16378	2.27535
hsa-miR-376c-5p	18	84	49.5	4.11	2.25	14:hsa;hsa-mir-376c,5,25,+	2.42479	1.32506
hsa-miR-23a-5p	26	84	84	4.11	2.25	19:hsa;hsa-mir-23a,9,30,-	4.1148	2.24858
hsa-miR-5701	11	81	6.75	3.97	2.17	KI270727.1:hsa;hsa-mir-5701-1,10,28,+	0.330653	0.18069
hsa-miR-5701	11	81	6.75	3.97	2.17	15:hsa;hsa-mir-5701-1,10,28,+	0.330653	0.18069
hsa-miR-5701	11	81	6.75	3.97	2.17	KI270727.1:hsa;hsa-mir-5701-3,10,28,+	0.330653	0.18069
hsa-miR-5701	11	81	6.75	3.97	2.17	15:hsa;hsa-mir-5701-2,10,28,+	0.330653	0.18069
hsa-miR-5701	11	81	6.75	3.97	2.17	15:hsa;hsa-mir-5701-2,10,28,+	0.330653	0.18069
hsa-miR-5701	11	81	6.75	3.97	2.17	15:hsa;hsa-mir-5701-1,10,28,+	0.330653	0.18069
hsa-miR-3129-5p	22	81	81	3.97	2.17	2:hsa;hsa-mir-3129,9,30,-	3.96784	2.16827
hsa-miR-5701	11	81	6.75	3.97	2.17	15:hsa;hsa-mir-5701-3,10,28,+	0.330653	0.18069
hsa-miR-5701	11	81	6.75	3.97	2.17	15:hsa;hsa-mir-5701-2,10,28,+	0.330653	0.18069
hsa-miR-5701	11	81	6.75	3.97	2.17	15:hsa;hsa-mir-5701-1,10,28,+	0.330653	0.18069
hsa-miR-5701	11	81	6.75	3.97	2.17	15:hsa;hsa-mir-5701-3,10,28,+	0.330653	0.18069
hsa-miR-5701	11	81	6.75	3.97	2.17	KI270727.1:hsa;hsa-mir-5701-2,10,28,+	0.330653	0.18069
hsa-miR-5701	11	81	6.75	3.97	2.17	15:hsa;hsa-mir-5701-3,10,28,+	0.330653	0.18069
hsa-miR-1291	23	80	80	3.92	2.14	12:hsa;hsa-mir-1291,14,37,-	3.91885	2.14151
hsa-miR-490-5p	13	80	80	3.92	2.14	7:hsa;hsa-mir-490,39,58,+	3.91885	2.14151
hsa-miR-328-3p	49	79	79	3.87	2.11	16:hsa;hsa-mir-328,48,69,-	3.86987	2.11474
hsa-miR-1468-5p	16	79	79	3.87	2.11	X:hsa;hsa-mir-1468,13,33,-	3.86987	2.11474
hsa-miR-504-5p	16	78	78	3.82	2.09	X:hsa;hsa-mir-504,13,34,-	3.82088	2.08797
hsa-miR-30b-3p	18	78	78	3.82	2.09	8:hsa;hsa-mir-30b,55,76,-	3.82088	2.08797
hsa-miR-6501-5p	17	77	77	3.77	2.06	21:hsa;hsa-mir-6501,3,24,+	3.7719	2.0612
hsa-miR-659-5p	21	77	77	3.77	2.06	22:hsa;hsa-mir-659,22,43,-	3.7719	2.0612
hsa-miR-1306-3p	26	76	76	3.72	2.03	22:hsa;hsa-mir-1306,55,72,+	3.72291	2.03443
hsa-miR-940	28	75	75	3.67	2.01	16:hsa;hsa-mir-940,60,80,+	3.67392	2.00766
hsa-miR-20b-5p	13	75	31.83	3.67	2.01	X:hsa;hsa-mir-20b,6,28,-	1.55938	0.852141
hsa-miR-3167	21	74	74	3.62	1.98	11:hsa;hsa-mir-3167,54,75,-	3.62494	1.98089
hsa-miR-1908-5p	18	73	73	3.58	1.95	11:hsa;hsa-mir-1908,12,32,-	3.57595	1.95412
hsa-miR-376a-5p	22	73	73	3.58	1.95	14:hsa;hsa-mir-376a-1,7,28,+	3.57595	1.95412
hsv1-miR-H6-3p	31	73	36.5	3.58	1.95	JQ673480:hsv1;hsv1-mir-H6,54,74,-	1.78798	0.977062
hsv1-miR-H6-3p	31	73	36.5	3.58	1.95	JQ673480:hsv1;hsv1-mir-H6,54,74,+	1.78798	0.977062
hsa-miR-579-5p	15	73	73	3.58	1.95	5:hsa;hsa-mir-579,25,46,-	3.57595	1.95412
hsa-miR-376b-5p	17	72	37.5	3.53	1.93	14:hsa;hsa-mir-376b,24,45,+	1.83696	1.00383
hsa-miR-98-3p	25	71	71	3.48	1.9	X:hsa;hsa-mir-98,80,101,-	3.47798	1.90059
hsa-miR-28-3p	42	71	71	3.48	1.9	3:hsa;hsa-mir-28,54,75,+	3.47798	1.90059
hsa-miR-1294	14	71	71	3.48	1.9	5:hsa;hsa-mir-1294,48,69,+	3.47798	1.90059
hsa-miR-181b-3p	25	71	71	3.48	1.9	1:hsa;hsa-mir-181b-1,76,96,-	3.47798	1.90059
hsa-miR-487a-5p	12	71	71	3.48	1.9	14:hsa;hsa-mir-487a,13,34,+	3.47798	1.90059
hsa-miR-195-3p	20	69	69	3.38	1.85	17:hsa;hsa-mir-195,53,74,-	3.38001	1.84705
hsa-miR-496	26	69	69	3.38	1.85	14:hsa;hsa-mir-496,56,77,+	3.38001	1.84705
hsa-miR-1271-5p	46	69	69	3.38	1.85	5:hsa;hsa-mir-1271,15,36,+	3.38001	1.84705
hsa-miR-1293	31	69	69	3.38	1.85	12:hsa;hsa-mir-1293,10,31,-	3.38001	1.84705
hsa-miR-937-3p	20	69	69	3.38	1.85	8:hsa;hsa-mir-937,51,72,-	3.38001	1.84705
hsa-miR-1343-3p	20	68	68	3.33	1.82	11:hsa;hsa-mir-1343,52,73,+	3.33102	1.82028
hsa-miR-628-5p	13	67	67	3.28	1.79	15:hsa;hsa-mir-628,23,44,-	3.28204	1.79351
hsa-miR-26a-2-3p	14	66	65.5	3.23	1.77	12:hsa;hsa-mir-26a-2,52,73,-	3.20856	1.75336
hsa-miR-380-3p	11	66	66	3.23	1.77	14:hsa;hsa-mir-380,40,61,+	3.23305	1.76674
hsa-miR-1245a	18	65	65	3.18	1.74	2:hsa;hsa-mir-1245a,45,65,+	3.18407	1.73997
hsa-miR-326	15	64	64	3.14	1.71	11:hsa;hsa-mir-326,60,79,-	3.13508	1.7132
hsa-miR-668-3p	33	63	63	3.09	1.69	14:hsa;hsa-mir-668,43,65,+	3.0861	1.68644
hsa-miR-128-1-5p	19	63	63	3.09	1.69	2:hsa;hsa-mir-128-1,15,37,+	3.0861	1.68644
hsa-miR-4775	9	62	62	3.04	1.66	2:hsa;hsa-mir-4775,10,31,+	3.03711	1.65967
hsa-miR-412-5p	15	62	62	3.04	1.66	14:hsa;hsa-mir-412,19,41,+	3.03711	1.65967
hsa-miR-4636	19	62	62	3.04	1.66	5:hsa;hsa-mir-4636,10,31,-	3.03711	1.65967
hsa-miR-129-2-3p	15	61	61	2.99	1.63	11:hsa;hsa-mir-129-2,57,78,+	2.98813	1.6329
hsa-miR-3913-5p	30	61	30.5	2.99	1.63	12:hsa;hsa-mir-3913-2,22,43,+	1.49406	0.816449
hsa-miR-16-1-3p	17	61	61	2.99	1.63	13:hsa;hsa-mir-16-1,56,77,-	2.98813	1.6329
hsa-miR-3913-5p	30	61	30.5	2.99	1.63	12:hsa;hsa-mir-3913-1,23,44,-	1.49406	0.816449
hsa-miR-1295a	19	60	60	2.94	1.61	1:hsa;hsa-mir-1295a,49,69,-	2.93914	1.60613
hsa-miR-497-5p	14	60	60	2.94	1.61	17:hsa;hsa-mir-497,24,44,-	2.93914	1.60613
hsa-miR-374c-5p	17	60	31.5	2.94	1.61	X:hsa;hsa-mir-374c,13,34,+	1.54305	0.843218
hsa-miR-766-3p	9	59	59	2.89	1.58	X:hsa;hsa-mir-766,65,86,-	2.89015	1.57936
hsa-miR-505-5p	16	58	58	2.84	1.55	X:hsa;hsa-mir-505,15,36,-	2.84117	1.55259
hsa-let-7c-3p	13	58	57.5	2.84	1.55	21:hsa;hsa-let-7c,56,77,+	2.81668	1.53921
hsa-miR-219a-1-3p	27	58	58	2.84	1.55	6:hsa;hsa-mir-219a-1,62,83,+	2.84117	1.55259
hsa-miR-106a-5p	25	57	28.33	2.79	1.53	X:hsa;hsa-mir-106a,13,35,-	1.38793	0.75845
hsa-miR-2116-3p	17	56	56	2.74	1.5	15:hsa;hsa-mir-2116,51,71,-	2.7432	1.49905
hsa-miR-200a-3p	15	56	56	2.74	1.5	1:hsa;hsa-mir-200a,54,75,+	2.7432	1.49905
hsa-miR-301a-3p	17	55	54.5	2.69	1.47	17:hsa;hsa-mir-301a,51,73,-	2.66972	1.4589
hsa-miR-665	11	55	55	2.69	1.47	14:hsa;hsa-mir-665,43,62,+	2.69421	1.47229
hsa-miR-548e-3p	32	54	54	2.65	1.45	10:hsa;hsa-mir-548e,53,74,+	2.64523	1.44552
hsa-miR-664a-5p	18	54	54	2.65	1.45	1:hsa;hsa-mir-664a,11,34,-	2.64523	1.44552
hsa-miR-335-5p	11	52	52	2.55	1.39	7:hsa;hsa-mir-335,16,38,+	2.54725	1.39198
hsa-miR-3651	11	51	51	2.5	1.37	9:hsa;hsa-mir-3651,64,87,-	2.49827	1.36521
hsa-miR-605-3p	11	50	50	2.45	1.34	10:hsa;hsa-mir-605,51,72,+	2.44928	1.33844
hsa-miR-5699-5p	10	49	49	2.4	1.31	10:hsa;hsa-mir-5699,10,31,-	2.4003	1.31167
hsa-miR-500b-3p	18	49	48.5	2.4	1.31	X:hsa;hsa-mir-500b,51,70,+	2.3758	1.29829
hsa-miR-3074-5p	14	48	48	2.35	1.28	9:hsa;hsa-mir-3074,12,32,-	2.35131	1.2849
hsa-miR-597-3p	26	47	47	2.3	1.26	8:hsa;hsa-mir-597,58,80,+	2.30233	1.25813
hsa-miR-34b-5p	23	46	42	2.25	1.23	11:hsa;hsa-mir-34b,13,35,+	2.0574	1.12429
hsa-miR-3591-5p	12	44	44	2.16	1.18	18:hsa;hsa-mir-3591,10,32,-	2.15537	1.17783
hsa-miR-301b-3p	7	44	43.5	2.16	1.18	22:hsa;hsa-mir-301b,45,67,+	2.13088	1.16444
hsa-miR-99a-3p	12	44	44	2.16	1.18	21:hsa;hsa-mir-99a,50,71,+	2.15537	1.17783
hsa-miR-1262	20	43	43	2.11	1.15	1:hsa;hsa-mir-1262,14,35,-	2.10638	1.15106
hsa-miR-96-5p	8	42	42	2.06	1.12	7:hsa;hsa-mir-96,9,31,-	2.0574	1.12429
hsa-miR-2355-5p	8	42	42	2.06	1.12	2:hsa;hsa-mir-2355,11,31,-	2.0574	1.12429
hsa-miR-550a-3-5p	14	41	32.2	2.01	1.1	7:hsa;hsa-mir-550a-3,21,40,-	1.57734	0.861956
hsa-miR-320c	27	41	17.03	2.01	1.1	18:hsa;hsa-mir-320c-1,50,69,+	0.834467	0.456005
hsa-miR-34a-3p	20	40	40	1.96	1.07	1:hsa;hsa-mir-34a,64,85,-	1.95943	1.07075
hsa-miR-548ay-3p	10	40	40	1.96	1.07	3:hsa;hsa-mir-548ay,64,85,-	1.95943	1.07075
hsa-miR-1270	11	40	40	1.96	1.07	19:hsa;hsa-mir-1270,13,35,-	1.95943	1.07075
hsa-miR-376b-3p	9	39	39	1.91	1.04	14:hsa;hsa-mir-376b,62,83,+	1.91044	1.04398
hsa-miR-210-5p	12	39	39	1.91	1.04	11:hsa;hsa-mir-210,28,49,-	1.91044	1.04398
hsa-miR-628-3p	16	39	39	1.91	1.04	15:hsa;hsa-mir-628,61,81,-	1.91044	1.04398
hsa-miR-541-3p	7	39	39	1.91	1.04	14:hsa;hsa-mir-541,54,75,+	1.91044	1.04398
hsa-miR-3187-3p	21	38	38	1.86	1.02	19:hsa;hsa-mir-3187,44,63,+	1.86146	1.01722
hsa-miR-6130	6	38	18	1.86	1.02	21:hsa;hsa-mir-6130,71,89,+	0.881742	0.481839
hsa-miR-6716-3p	17	38	38	1.86	1.02	11:hsa;hsa-mir-6716,49,70,+	1.86146	1.01722
hsa-miR-363-3p	11	36	36	1.76	0.96	X:hsa;hsa-mir-363,50,71,-	1.76348	0.963678
hsa-miR-4791	9	35	35	1.71	0.94	3:hsa;hsa-mir-4791,8,25,-	1.7145	0.936909
hsa-miR-450a-1-3p	9	35	35	1.71	0.94	X:hsa;hsa-mir-450a-1,53,74,-	1.7145	0.936909
hsa-miR-28-5p	21	35	35	1.71	0.94	3:hsa;hsa-mir-28,14,35,+	1.7145	0.936909
hsa-miR-3200-3p	10	34	34	1.67	0.91	22:hsa;hsa-mir-3200,54,75,+	1.66551	0.91014
hsa-miR-6866-5p	14	34	34	1.67	0.91	17:hsa;hsa-mir-6866,6,28,+	1.66551	0.91014
hsa-miR-582-5p	8	34	34	1.67	0.91	5:hsa;hsa-mir-582,16,38,-	1.66551	0.91014
hsa-miR-3609	24	34	34	1.67	0.91	7:hsa;hsa-mir-3609,51,74,+	1.66551	0.91014
hsa-miR-6852-5p	12	33	33	1.62	0.88	9:hsa;hsa-mir-6852,6,26,-	1.61653	0.883371
hsa-miR-139-5p	12	33	33	1.62	0.88	11:hsa;hsa-mir-139,7,29,-	1.61653	0.883371
hsa-miR-142-3p	11	33	33	1.62	0.88	17:hsa;hsa-mir-142,52,74,-	1.61653	0.883371
hsa-miR-5001-3p	14	33	33	1.62	0.88	2:hsa;hsa-mir-5001,60,81,-	1.61653	0.883371
hsa-miR-122-5p	9	32	32	1.57	0.86	18:hsa;hsa-mir-122,15,36,+	1.56754	0.856602
hsa-miR-3662	8	31	31	1.52	0.83	6:hsa;hsa-mir-3662,55,78,-	1.51856	0.829834
hsa-miR-196b-3p	9	31	31	1.52	0.83	7:hsa;hsa-mir-196b,50,71,-	1.51856	0.829834
hsa-miR-4474-3p	16	31	31	1.52	0.83	9:hsa;hsa-mir-4474,45,66,-	1.51856	0.829834
hsa-let-7g-3p	12	31	31	1.52	0.83	3:hsa;hsa-let-7g,62,82,-	1.51856	0.829834
hsa-miR-203a-3p	17	30	30	1.47	0.8	14:hsa;hsa-mir-203a,65,86,+	1.46957	0.803065
hsa-miR-153-3p	8	30	15	1.47	0.8	7:hsa;hsa-mir-153-2,53,74,-	0.734785	0.401532
hsa-miR-494-5p	17	30	30	1.47	0.8	14:hsa;hsa-mir-494,15,37,+	1.46957	0.803065
hsa-miR-92a-1-5p	11	30	30	1.47	0.8	13:hsa;hsa-mir-92a-1,11,33,+	1.46957	0.803065
hsa-miR-153-3p	8	30	15	1.47	0.8	2:hsa;hsa-mir-153-1,54,75,-	0.734785	0.401532
hsa-miR-346	11	30	30	1.47	0.8	10:hsa;hsa-mir-346,20,42,-	1.46957	0.803065
hsa-miR-550a-3p	11	29	9.67	1.42	0.78	7:hsa;hsa-mir-550a-3,60,81,-	0.473528	0.258765
hsa-miR-487b-5p	15	29	29	1.42	0.78	14:hsa;hsa-mir-487b,15,36,+	1.42058	0.776296
hsa-miR-550a-3p	11	29	9.67	1.42	0.78	7:hsa;hsa-mir-550a-1,61,82,+	0.473528	0.258765
hsa-miR-550a-3p	11	29	9.67	1.42	0.78	7:hsa;hsa-mir-550a-2,61,82,+	0.473528	0.258765
hsa-miR-3179	11	28	1.75	1.37	0.75	16:hsa;hsa-mir-3179-3,52,73,+	0.0857249	0.0468454
hsa-miR-4470	12	28	28	1.37	0.75	8:hsa;hsa-mir-4470,45,65,+	1.3716	0.749527
hsa-miR-3179	11	28	1.75	1.37	0.75	16:hsa;hsa-mir-3179-4,52,73,-	0.0857249	0.0468454
hsa-miR-3179	11	28	1.75	1.37	0.75	16:hsa;hsa-mir-3179-4,52,73,+	0.0857249	0.0468454
hsa-miR-3179	11	28	1.75	1.37	0.75	16:hsa;hsa-mir-3179-4,52,73,+	0.0857249	0.0468454
hsa-miR-3179	11	28	1.75	1.37	0.75	16:hsa;hsa-mir-3179-2,52,73,-	0.0857249	0.0468454
hsa-miR-3179	11	28	1.75	1.37	0.75	16:hsa;hsa-mir-3179-2,52,73,+	0.0857249	0.0468454
hsa-miR-3179	11	28	1.75	1.37	0.75	16:hsa;hsa-mir-3179-1,52,73,-	0.0857249	0.0468454
hsa-miR-3179	11	28	1.75	1.37	0.75	16:hsa;hsa-mir-3179-3,52,73,+	0.0857249	0.0468454
hsa-miR-3179	11	28	1.75	1.37	0.75	16:hsa;hsa-mir-3179-2,52,73,+	0.0857249	0.0468454
hsa-miR-3179	11	28	1.75	1.37	0.75	16:hsa;hsa-mir-3179-4,52,73,-	0.0857249	0.0468454
hsa-miR-3179	11	28	1.75	1.37	0.75	16:hsa;hsa-mir-3179-2,52,73,-	0.0857249	0.0468454
hsa-miR-3179	11	28	1.75	1.37	0.75	16:hsa;hsa-mir-3179-1,52,73,+	0.0857249	0.0468454
hsa-miR-3179	11	28	1.75	1.37	0.75	16:hsa;hsa-mir-3179-1,52,73,+	0.0857249	0.0468454
hsa-miR-3179	11	28	1.75	1.37	0.75	16:hsa;hsa-mir-3179-3,52,73,-	0.0857249	0.0468454
hsa-miR-3179	11	28	1.75	1.37	0.75	16:hsa;hsa-mir-3179-3,52,73,-	0.0857249	0.0468454
hsa-miR-581	12	28	28	1.37	0.75	5:hsa;hsa-mir-581,16,36,-	1.3716	0.749527
hsa-miR-3179	11	28	1.75	1.37	0.75	16:hsa;hsa-mir-3179-1,52,73,-	0.0857249	0.0468454
hsa-miR-5000-5p	6	27	27	1.32	0.72	2:hsa;hsa-mir-5000,24,45,+	1.32261	0.722758
hsa-miR-4676-3p	16	27	27	1.32	0.72	10:hsa;hsa-mir-4676,44,65,+	1.32261	0.722758
hsa-miR-1910-5p	16	27	27	1.32	0.72	16:hsa;hsa-mir-1910,12,32,-	1.32261	0.722758
hsa-miR-580-3p	12	27	27	1.32	0.72	5:hsa;hsa-mir-580,61,82,-	1.32261	0.722758
hsa-miR-3148	15	26	26	1.27	0.7	8:hsa;hsa-mir-3148,10,31,-	1.27363	0.695989
hsa-miR-3691-5p	21	26	26	1.27	0.7	6:hsa;hsa-mir-3691,15,37,-	1.27363	0.695989
hsa-miR-320c	17	26	6.87	1.27	0.7	18:hsa;hsa-mir-320c-2,31,50,+	0.336446	0.183855
hsa-miR-612	20	25	25	1.22	0.67	11:hsa;hsa-mir-612,16,40,+	1.22464	0.669221
hsa-miR-6723-5p	14	25	25	1.22	0.67	1:hsa;hsa-mir-6723,11,32,-	1.22464	0.669221
hsa-miR-4659a-3p	11	25	25	1.22	0.67	8:hsa;hsa-mir-4659a,49,70,+	1.22464	0.669221
hsa-miR-3605-5p	17	24	24	1.18	0.64	1:hsa;hsa-mir-3605,22,44,-	1.17566	0.642452
hsa-miR-1185-5p	11	24	12	1.18	0.64	14:hsa;hsa-mir-1185-2,15,35,+	0.587828	0.321226
hsa-miR-1538	11	24	24	1.18	0.64	16:hsa;hsa-mir-1538,39,61,-	1.17566	0.642452
hsa-miR-33b-3p	13	24	24	1.18	0.64	17:hsa;hsa-mir-33b,54,75,-	1.17566	0.642452
hsa-miR-1185-5p	11	24	12	1.18	0.64	14:hsa;hsa-mir-1185-1,15,35,+	0.587828	0.321226
hsa-miR-3944-3p	13	24	24	1.18	0.64	10:hsa;hsa-mir-3944,63,85,-	1.17566	0.642452
hsa-miR-629-3p	18	23	23	1.13	0.62	15:hsa;hsa-mir-629,61,82,-	1.12667	0.615683
hsa-miR-3180-3p	14	23	1.8	1.13	0.62	16:hsa;hsa-mir-3180-3,62,83,+	0.0880372	0.048109
hsa-miR-3180-3p	14	23	1.8	1.13	0.62	16:hsa;hsa-mir-3180-1,62,83,-	0.0880372	0.048109
hsa-miR-135b-5p	5	23	23	1.13	0.62	1:hsa;hsa-mir-135b,16,38,-	1.12667	0.615683
hsa-miR-100-3p	9	23	23	1.13	0.62	11:hsa;hsa-mir-100,48,69,-	1.12667	0.615683
hsa-miR-624-5p	7	23	23	1.13	0.62	14:hsa;hsa-mir-624,16,37,-	1.12667	0.615683
hsa-miR-3180-3p	14	23	1.8	1.13	0.62	16:hsa;hsa-mir-3180-2,58,79,-	0.0880372	0.048109
hsa-miR-3180-3p	14	23	1.8	1.13	0.62	16:hsa;hsa-mir-3180-3,62,83,-	0.0880372	0.048109
hsa-miR-4661-5p	9	23	23	1.13	0.62	8:hsa;hsa-mir-4661,10,31,+	1.12667	0.615683
hsa-miR-3180-3p	14	23	1.8	1.13	0.62	16:hsa;hsa-mir-3180-4,36,57,-	0.0880372	0.048109
hsa-miR-142-5p	12	23	23	1.13	0.62	17:hsa;hsa-mir-142,16,36,-	1.12667	0.615683
hsa-miR-548o-3p	11	23	11.5	1.13	0.62	7:hsa;hsa-mir-548o,87,108,-	0.563335	0.307841
hsa-miR-3180-3p	14	23	1.8	1.13	0.62	16:hsa;hsa-mir-3180-2,58,79,+	0.0880372	0.048109
hsa-miR-3180-3p	14	23	1.8	1.13	0.62	16:hsa;hsa-mir-3180-3,62,83,+	0.0880372	0.048109
hsa-miR-3180-3p	14	23	1.8	1.13	0.62	16:hsa;hsa-mir-3180-1,62,83,+	0.0880372	0.048109
hsa-miR-3180-3p	14	23	1.8	1.13	0.62	16:hsa;hsa-mir-3180-2,58,79,+	0.0880372	0.048109
hsa-miR-3180-3p	14	23	1.8	1.13	0.62	16:hsa;hsa-mir-3180-5,36,57,-	0.0880372	0.048109
hsa-miR-548o-3p	11	23	11.5	1.13	0.62	20:hsa;hsa-mir-548o-2,45,66,+	0.563335	0.307841
hsa-miR-3180-3p	14	23	1.8	1.13	0.62	16:hsa;hsa-mir-3180-1,62,83,+	0.0880372	0.048109
hsa-miR-5000-3p	9	22	22	1.08	0.59	2:hsa;hsa-mir-5000,62,83,+	1.07768	0.588914
hsa-miR-329-5p	9	22	11	1.08	0.59	14:hsa;hsa-mir-329-1,13,35,+	0.538842	0.294457
hsa-miR-5582-3p	12	22	22	1.08	0.59	11:hsa;hsa-mir-5582,47,68,-	1.07768	0.588914
hsa-miR-491-5p	9	22	22	1.08	0.59	9:hsa;hsa-mir-491,16,37,+	1.07768	0.588914
hsa-miR-329-5p	9	22	11	1.08	0.59	14:hsa;hsa-mir-329-2,15,37,+	0.538842	0.294457
hsa-miR-483-3p	12	22	22	1.08	0.59	11:hsa;hsa-mir-483,48,68,-	1.07768	0.588914
hsa-miR-597-5p	6	21	21	1.03	0.56	8:hsa;hsa-mir-597,16,37,+	1.0287	0.562145
hsa-miR-3180	12	21	1.62	1.03	0.56	16:hsa;hsa-mir-3180-4,36,54,-	0.0791307	0.0432419
hsa-miR-4785	10	21	21	1.03	0.56	2:hsa;hsa-mir-4785,44,64,-	1.0287	0.562145
hsa-miR-3128	12	21	21	1.03	0.56	2:hsa;hsa-mir-3128,5,27,-	1.0287	0.562145
hsa-miR-652-5p	12	21	21	1.03	0.56	X:hsa;hsa-mir-652,21,45,+	1.0287	0.562145
hsa-miR-3180	12	21	1.62	1.03	0.56	16:hsa;hsa-mir-3180-5,36,54,-	0.0791307	0.0432419
hsa-miR-933	10	21	21	1.03	0.56	2:hsa;hsa-mir-933,47,68,-	1.0287	0.562145
hsa-miR-3170	8	21	21	1.03	0.56	13:hsa;hsa-mir-3170,10,31,+	1.0287	0.562145
hsa-miR-3154	14	21	21	1.03	0.56	9:hsa;hsa-mir-3154,54,75,-	1.0287	0.562145
hsa-miR-548k	13	21	21	1.03	0.56	11:hsa;hsa-mir-548k,32,53,+	1.0287	0.562145
hsa-miR-5699-3p	10	20	20	0.98	0.54	10:hsa;hsa-mir-5699,59,80,-	0.979713	0.535376
hsa-miR-33a-3p	6	20	20	0.98	0.54	22:hsa;hsa-mir-33a,46,67,+	0.979713	0.535376
hsa-miR-3174	12	20	20	0.98	0.54	15:hsa;hsa-mir-3174,10,32,+	0.979713	0.535376
hsa-miR-3677-5p	8	20	20	0.98	0.54	16:hsa;hsa-mir-3677,3,24,+	0.979713	0.535376
hsa-miR-3677-3p	7	20	20	0.98	0.54	16:hsa;hsa-mir-3677,39,60,+	0.979713	0.535376
hsa-miR-4796-5p	10	20	20	0.98	0.54	3:hsa;hsa-mir-4796,9,30,-	0.979713	0.535376
hsa-miR-1245b-3p	14	19	19	0.93	0.51	2:hsa;hsa-mir-1245b,42,63,-	0.930728	0.508608
hsa-miR-502-5p	15	19	19	0.93	0.51	X:hsa;hsa-mir-502,16,36,+	0.930728	0.508608
hsa-miR-4725-3p	11	19	19	0.93	0.51	17:hsa;hsa-mir-4725,58,79,+	0.930728	0.508608
hsa-miR-6827-5p	7	19	19	0.93	0.51	3:hsa;hsa-mir-6827,6,27,-	0.930728	0.508608
hsa-miR-134-3p	11	19	19	0.93	0.51	14:hsa;hsa-mir-134,46,68,+	0.930728	0.508608
hsa-miR-6516-5p	9	19	19	0.93	0.51	17:hsa;hsa-mir-6516,12,33,+	0.930728	0.508608
hsa-miR-6516-3p	11	19	19	0.93	0.51	17:hsa;hsa-mir-6516,53,74,+	0.930728	0.508608
hsa-miR-4787-3p	9	18	18	0.88	0.48	3:hsa;hsa-mir-4787,51,74,+	0.881742	0.481839
hsa-miR-6513-3p	7	18	18	0.88	0.48	2:hsa;hsa-mir-6513,42,62,-	0.881742	0.481839
hsa-miR-3138	11	18	18	0.88	0.48	4:hsa;hsa-mir-3138,48,71,-	0.881742	0.481839
hsa-miR-194-3p	9	18	18	0.88	0.48	11:hsa;hsa-mir-194-2,51,72,-	0.881742	0.481839
hsa-miR-3173-5p	6	18	18	0.88	0.48	14:hsa;hsa-mir-3173,5,26,-	0.881742	0.481839
hsa-miR-4435	11	18	4.5	0.88	0.48	2:hsa;hsa-mir-4435-1,10,31,-	0.220435	0.12046
hsa-miR-4435	11	18	4.5	0.88	0.48	2:hsa;hsa-mir-4435-2,5,26,-	0.220435	0.12046
hsa-miR-488-3p	6	18	18	0.88	0.48	1:hsa;hsa-mir-488,52,72,-	0.881742	0.481839
hsa-miR-664b-3p	6	18	18	0.88	0.48	X:hsa;hsa-mir-664b,40,61,+	0.881742	0.481839
hsa-miR-4435	11	18	4.5	0.88	0.48	2:hsa;hsa-mir-4435-1,10,31,+	0.220435	0.12046
hsa-miR-4677-5p	8	18	18	0.88	0.48	1:hsa;hsa-mir-4677,13,34,+	0.881742	0.481839
hsa-miR-943	12	18	18	0.88	0.48	4:hsa;hsa-mir-943,55,75,-	0.881742	0.481839
hsa-miR-4435	11	18	4.5	0.88	0.48	2:hsa;hsa-mir-4435-2,5,26,+	0.220435	0.12046
hsa-miR-323a-5p	8	18	18	0.88	0.48	14:hsa;hsa-mir-323a,16,37,+	0.881742	0.481839
hsa-miR-4497	12	17	17	0.83	0.46	12:hsa;hsa-mir-4497,3,19,+	0.832756	0.45507
hsa-miR-660-3p	5	17	17	0.83	0.46	X:hsa;hsa-mir-660,52,72,+	0.832756	0.45507
hsa-miR-449c-5p	9	17	17	0.83	0.46	5:hsa;hsa-mir-449c,17,41,-	0.832756	0.45507
hsa-miR-4423-5p	7	17	17	0.83	0.46	1:hsa;hsa-mir-4423,13,34,+	0.832756	0.45507
hsa-miR-542-5p	6	17	17	0.83	0.46	X:hsa;hsa-mir-542,16,38,-	0.832756	0.45507
hsa-miR-324-3p	16	17	17	0.83	0.46	17:hsa;hsa-mir-324,53,72,-	0.832756	0.45507
hsa-miR-1909-3p	10	17	17	0.83	0.46	19:hsa;hsa-mir-1909,49,70,-	0.832756	0.45507
hsa-miR-219a-5p	7	17	16	0.83	0.46	6:hsa;hsa-mir-219a-1,21,41,+	0.783771	0.428301
hsa-miR-6877-5p	11	17	17	0.83	0.46	9:hsa;hsa-mir-6877,6,27,+	0.832756	0.45507
hsa-miR-2277-3p	10	16	16	0.78	0.43	5:hsa;hsa-mir-2277,59,79,-	0.783771	0.428301
hsa-miR-1275	5	16	16	0.78	0.43	6:hsa;hsa-mir-1275,18,34,-	0.783771	0.428301
hsa-miR-6515-5p	8	16	16	0.78	0.43	19:hsa;hsa-mir-6515,3,23,+	0.783771	0.428301
hsa-miR-590-3p	14	16	16	0.78	0.43	7:hsa;hsa-mir-590,56,76,+	0.783771	0.428301
hsa-miR-181b-2-3p	9	16	16	0.78	0.43	9:hsa;hsa-mir-181b-2,54,73,+	0.783771	0.428301
hsa-miR-3150a-5p	6	15	15	0.73	0.4	8:hsa;hsa-mir-3150a,12,33,+	0.734785	0.401532
hsa-miR-4683	6	15	15	0.73	0.4	10:hsa;hsa-mir-4683,50,72,-	0.734785	0.401532
hsa-miR-642a-3p	8	15	14.5	0.73	0.4	19:hsa;hsa-mir-642a,51,72,+	0.710292	0.388148
hsa-miR-1276	5	15	15	0.73	0.4	15:hsa;hsa-mir-1276,12,31,-	0.734785	0.401532
hsa-miR-6733-5p	11	15	15	0.73	0.4	1:hsa;hsa-mir-6733,6,27,-	0.734785	0.401532
hsa-miR-1298-5p	5	15	15	0.73	0.4	X:hsa;hsa-mir-1298,18,39,+	0.734785	0.401532
hsa-miR-4485-5p	11	15	15	0.73	0.4	11:hsa;hsa-mir-4485,7,22,-	0.734785	0.401532
hsa-miR-219b-5p	7	15	15	0.73	0.4	9:hsa;hsa-mir-219b,14,35,+	0.734785	0.401532
hsa-miR-184	7	15	15	0.73	0.4	15:hsa;hsa-mir-184,53,74,+	0.734785	0.401532
hsa-miR-3190-3p	8	14	14	0.69	0.37	19:hsa;hsa-mir-3190,47,69,+	0.685799	0.374764
hsa-miR-4709-5p	12	14	14	0.69	0.37	14:hsa;hsa-mir-4709,9,30,-	0.685799	0.374764
hsa-miR-4684-3p	6	14	14	0.69	0.37	1:hsa;hsa-mir-4684,50,71,+	0.685799	0.374764
hsa-miR-429	5	14	14	0.69	0.37	1:hsa;hsa-mir-429,51,72,+	0.685799	0.374764
hsa-miR-708-5p	12	14	14	0.69	0.37	11:hsa;hsa-mir-708,11,33,-	0.685799	0.374764
hsa-miR-146a-3p	6	14	14	0.69	0.37	5:hsa;hsa-mir-146a,57,78,+	0.685799	0.374764
hsa-miR-4741	12	14	14	0.69	0.37	18:hsa;hsa-mir-4741,59,81,+	0.685799	0.374764
hsa-miR-302a-5p	7	14	14	0.69	0.37	4:hsa;hsa-mir-302a,6,28,-	0.685799	0.374764
hsa-miR-1228-5p	7	14	14	0.69	0.37	12:hsa;hsa-mir-1228,1,21,+	0.685799	0.374764
hsa-miR-488-5p	3	14	14	0.69	0.37	1:hsa;hsa-mir-488,14,34,-	0.685799	0.374764
hsa-miR-503-3p	11	14	14	0.69	0.37	X:hsa;hsa-mir-503,46,68,-	0.685799	0.374764
hsa-miR-573	6	14	14	0.69	0.37	4:hsa;hsa-mir-573,16,39,-	0.685799	0.374764
hsa-miR-3064-5p	7	13	13	0.64	0.35	17:hsa;hsa-mir-3064,3,23,-	0.636814	0.347995
hsa-miR-618	11	13	13	0.64	0.35	12:hsa;hsa-mir-618,16,38,-	0.636814	0.347995
hsa-miR-6720-5p	8	13	13	0.64	0.35	6:hsa;hsa-mir-6720,31,53,-	0.636814	0.347995
hsa-miR-1245b-5p	10	13	13	0.64	0.35	2:hsa;hsa-mir-1245b,9,29,-	0.636814	0.347995
hsa-miR-4664-3p	8	13	13	0.64	0.35	8:hsa;hsa-mir-4664,44,65,-	0.636814	0.347995
hsa-miR-218-1-3p	8	13	13	0.64	0.35	4:hsa;hsa-mir-218-1,68,89,+	0.636814	0.347995
hsa-miR-3940-5p	5	13	13	0.64	0.35	19:hsa;hsa-mir-3940,23,42,-	0.636814	0.347995
hsa-miR-3688-3p	7	13	7	0.64	0.35	4:hsa;hsa-mir-3688-1,60,81,-	0.3429	0.187382
hsa-miR-1228-3p	7	13	13	0.64	0.35	12:hsa;hsa-mir-1228,52,71,+	0.636814	0.347995
hsa-miR-3130-5p	8	13	9	0.64	0.35	2:hsa;hsa-mir-3130-2,13,33,+	0.440871	0.240919
hsa-miR-3614-5p	11	13	13	0.64	0.35	17:hsa;hsa-mir-3614,15,37,-	0.636814	0.347995
hsa-miR-579-3p	5	13	13	0.64	0.35	5:hsa;hsa-mir-579,62,84,-	0.636814	0.347995
hsa-miR-23c	11	13	9.83	0.64	0.35	X:hsa;hsa-mir-23c,66,87,-	0.481692	0.263227
hsa-miR-3622a-5p	7	13	13	0.64	0.35	8:hsa;hsa-mir-3622a,14,35,+	0.636814	0.347995
hsa-miR-556-5p	3	13	13	0.64	0.35	1:hsa;hsa-mir-556,16,37,+	0.636814	0.347995
hsa-miR-541-5p	9	13	13	0.64	0.35	14:hsa;hsa-mir-541,10,34,+	0.636814	0.347995
hsa-miR-4517	6	12	12	0.59	0.32	16:hsa;hsa-mir-4517,5,29,+	0.587828	0.321226
hsa-miR-3157-5p	9	12	12	0.59	0.32	10:hsa;hsa-mir-3157,10,31,-	0.587828	0.321226
hsa-miR-3065-5p	7	12	12	0.59	0.32	17:hsa;hsa-mir-3065,10,32,+	0.587828	0.321226
hsa-miR-3688-3p	6	12	6	0.59	0.32	4:hsa;hsa-mir-3688-2,57,78,+	0.293914	0.160613
hsa-miR-605-5p	6	12	12	0.59	0.32	10:hsa;hsa-mir-605,16,38,+	0.587828	0.321226
hsa-miR-548al	8	12	12	0.59	0.32	11:hsa;hsa-mir-548al,65,86,+	0.587828	0.321226
hsa-miR-375	7	12	12	0.59	0.32	2:hsa;hsa-mir-375,40,61,-	0.587828	0.321226
hsa-miR-1287-3p	3	12	12	0.59	0.32	10:hsa;hsa-mir-1287,55,76,-	0.587828	0.321226
hsa-miR-449a	6	12	12	0.59	0.32	5:hsa;hsa-mir-449a,16,37,-	0.587828	0.321226
hsa-miR-6842-3p	3	12	12	0.59	0.32	8:hsa;hsa-mir-6842,44,65,+	0.587828	0.321226
hsa-miR-3653-3p	9	12	12	0.59	0.32	22:hsa;hsa-mir-3653,75,92,-	0.587828	0.321226
hsa-miR-6505-5p	5	12	12	0.59	0.32	12:hsa;hsa-mir-6505,4,25,+	0.587828	0.321226
hsv1-miR-H15	1	12	6	0.59	0.32	JQ673480:hsv1;hsv1-mir-H15,62,83,+	0.293914	0.160613
hsv1-miR-H15	1	12	6	0.59	0.32	JQ673480:hsv1;hsv1-mir-H15,62,83,-	0.293914	0.160613
hsa-miR-103a-2-5p	9	12	12	0.59	0.32	20:hsa;hsa-mir-103a-2,11,33,+	0.587828	0.321226
hsa-miR-577	7	12	12	0.59	0.32	4:hsa;hsa-mir-577,16,36,+	0.587828	0.321226
hsa-miR-500a-5p	12	12	11	0.59	0.32	X:hsa;hsa-mir-500a,13,35,+	0.538842	0.294457
hsa-miR-151a-5p	7	12	10	0.59	0.32	8:hsa;hsa-mir-151a,11,31,-	0.489857	0.267688
hsa-miR-6514-5p	10	11	11	0.54	0.29	11:hsa;hsa-mir-6514,1,23,-	0.538842	0.294457
hsa-miR-3157-3p	8	11	11	0.54	0.29	10:hsa;hsa-mir-3157,58,79,-	0.538842	0.294457
hsa-miR-4717-3p	8	11	11	0.54	0.29	16:hsa;hsa-mir-4717,42,62,+	0.538842	0.294457
hsa-miR-942-3p	4	11	11	0.54	0.29	1:hsa;hsa-mir-942,53,74,+	0.538842	0.294457
hsa-miR-133a-3p	6	11	5.5	0.54	0.29	18:hsa;hsa-mir-133a-1,53,74,-	0.269421	0.147229
hsa-miR-20a-3p	7	11	11	0.54	0.29	13:hsa;hsa-mir-20a,44,65,+	0.538842	0.294457
hsa-miR-133a-3p	6	11	5.5	0.54	0.29	20:hsa;hsa-mir-133a-2,59,80,+	0.269421	0.147229
hsa-miR-3152-5p	7	11	11	0.54	0.29	9:hsa;hsa-mir-3152,11,32,+	0.538842	0.294457
hsa-miR-3199	7	11	5.5	0.54	0.29	22:hsa;hsa-mir-3199-2,10,32,+	0.269421	0.147229
hsa-miR-381-5p	6	11	11	0.54	0.29	14:hsa;hsa-mir-381,8,29,+	0.538842	0.294457
hsa-miR-4999-5p	8	11	11	0.54	0.29	19:hsa;hsa-mir-4999,21,41,-	0.538842	0.294457
hsa-miR-3184-5p	4	11	11	0.54	0.29	17:hsa;hsa-mir-3184,10,33,-	0.538842	0.294457
hsa-miR-643	7	11	11	0.54	0.29	19:hsa;hsa-mir-643,61,82,+	0.538842	0.294457
hsa-miR-3199	7	11	5.5	0.54	0.29	22:hsa;hsa-mir-3199-1,10,32,-	0.269421	0.147229
hsa-miR-9-3p	4	10	3.33	0.49	0.27	5:hsa;hsa-mir-9-2,53,74,-	0.163286	0.0892294
hsa-miR-9-3p	4	10	3.33	0.49	0.27	1:hsa;hsa-mir-9-1,55,76,-	0.163286	0.0892294
hsa-miR-576-5p	7	10	10	0.49	0.27	4:hsa;hsa-mir-576,16,37,+	0.489857	0.267688
hsa-miR-4638-5p	6	10	10	0.49	0.27	5:hsa;hsa-mir-4638,2,22,-	0.489857	0.267688
hsa-miR-190b	6	10	10	0.49	0.27	1:hsa;hsa-mir-190b,11,31,-	0.489857	0.267688
hsa-miR-642a-5p	4	10	10	0.49	0.27	19:hsa;hsa-mir-642a,16,37,+	0.489857	0.267688
hsa-miR-3653-5p	8	10	10	0.49	0.27	22:hsa;hsa-mir-3653,23,42,-	0.489857	0.267688
hsa-miR-4761-3p	6	10	10	0.49	0.27	22:hsa;hsa-mir-4761,62,82,+	0.489857	0.267688
hsa-miR-4423-3p	6	10	10	0.49	0.27	1:hsa;hsa-mir-4423,49,69,+	0.489857	0.267688
hsa-miR-200a-5p	4	10	10	0.49	0.27	1:hsa;hsa-mir-200a,16,37,+	0.489857	0.267688
hsv1-miR-H4-3p	7	10	5	0.49	0.27	JQ673480:hsv1;hsv1-mir-H4,54,75,+	0.244928	0.133844
hsa-miR-522-3p	6	10	10	0.49	0.27	19:hsa;hsa-mir-522,54,75,+	0.489857	0.267688
hsa-miR-491-3p	7	10	10	0.49	0.27	9:hsa;hsa-mir-491,50,71,+	0.489857	0.267688
hsa-miR-378a-5p	9	10	10	0.49	0.27	5:hsa;hsa-mir-378a,5,26,+	0.489857	0.267688
hsa-miR-9-3p	4	10	3.33	0.49	0.27	15:hsa;hsa-mir-9-3,55,76,+	0.163286	0.0892294
hsa-miR-610	4	10	10	0.49	0.27	11:hsa;hsa-mir-610,16,36,+	0.489857	0.267688
hsa-miR-4645-3p	8	10	10	0.49	0.27	6:hsa;hsa-mir-4645,47,68,-	0.489857	0.267688
hsv1-miR-H4-3p	7	10	5	0.49	0.27	JQ673480:hsv1;hsv1-mir-H4,54,75,-	0.244928	0.133844
hsa-miR-4665-5p	6	10	10	0.49	0.27	9:hsa;hsa-mir-4665,10,32,+	0.489857	0.267688
hsa-miR-197-5p	8	10	10	0.49	0.27	1:hsa;hsa-mir-197,9,31,+	0.489857	0.267688
hsa-miR-495-5p	4	9	9	0.44	0.24	14:hsa;hsa-mir-495,14,35,+	0.440871	0.240919
hsa-miR-6755-5p	8	9	9	0.44	0.24	11:hsa;hsa-mir-6755,6,27,+	0.440871	0.240919
hsa-miR-4638-3p	9	9	9	0.44	0.24	5:hsa;hsa-mir-4638,35,57,-	0.440871	0.240919
hsa-miR-4762-3p	6	9	9	0.44	0.24	22:hsa;hsa-mir-4762,49,70,+	0.440871	0.240919
hsa-miR-4284	4	9	9	0.44	0.24	7:hsa;hsa-mir-4284,11,28,+	0.440871	0.240919
hsa-miR-1193	7	9	9	0.44	0.24	14:hsa;hsa-mir-1193,10,32,+	0.440871	0.240919
hsa-miR-6840-5p	8	9	9	0.44	0.24	7:hsa;hsa-mir-6840,6,29,+	0.440871	0.240919
hsa-miR-4726-5p	3	9	9	0.44	0.24	17:hsa;hsa-mir-4726,1,23,+	0.440871	0.240919
hsa-miR-376a-2-5p	7	9	9	0.44	0.24	14:hsa;hsa-mir-376a-2,12,32,+	0.440871	0.240919
hsa-miR-4725-5p	8	9	9	0.44	0.24	17:hsa;hsa-mir-4725,13,33,+	0.440871	0.240919
hsa-miR-708-3p	7	9	9	0.44	0.24	11:hsa;hsa-mir-708,57,78,-	0.440871	0.240919
hsa-miR-889-5p	5	9	9	0.44	0.24	14:hsa;hsa-mir-889,11,32,+	0.440871	0.240919
hsa-miR-1304-5p	8	9	9	0.44	0.24	11:hsa;hsa-mir-1304,20,41,-	0.440871	0.240919
hsa-miR-1226-5p	7	9	9	0.44	0.24	3:hsa;hsa-mir-1226,1,26,+	0.440871	0.240919
hsa-miR-3130-5p	6	9	5	0.44	0.24	2:hsa;hsa-mir-3130-1,13,33,-	0.244928	0.133844
hsa-miR-5001-5p	5	9	9	0.44	0.24	2:hsa;hsa-mir-5001,21,44,-	0.440871	0.240919
hsa-miR-4455	1	9	9	0.44	0.24	4:hsa;hsa-mir-4455,4,20,-	0.440871	0.240919
hsa-miR-362-3p	4	9	9	0.44	0.24	X:hsa;hsa-mir-362,42,63,+	0.440871	0.240919
hsa-miR-939-5p	7	9	9	0.44	0.24	8:hsa;hsa-mir-939,15,38,-	0.440871	0.240919
hsa-miR-4750-5p	4	9	9	0.44	0.24	19:hsa;hsa-mir-4750,3,24,+	0.440871	0.240919
hsa-miR-6881-3p	6	9	9	0.44	0.24	15:hsa;hsa-mir-6881,51,72,-	0.440871	0.240919
hsa-miR-3140-3p	5	9	9	0.44	0.24	4:hsa;hsa-mir-3140,60,81,-	0.440871	0.240919
hsa-miR-3942-5p	4	8	8	0.39	0.21	15:hsa;hsa-mir-3942,23,44,-	0.391885	0.214151
hsv1-miR-H17a	4	8	2	0.39	0.21	JQ673480:hsv1;hsv1-mir-H17a,63,83,-	0.0979713	0.0535376
hsv1-miR-H17	4	8	2	0.39	0.21	JQ673480:hsv1;hsv1-mir-H17a,63,83,-	0.0979713	0.0535376
hsa-miR-3613-5p	2	8	8	0.39	0.21	13:hsa;hsa-mir-3613,16,37,-	0.391885	0.214151
hsa-miR-627-5p	6	8	8	0.39	0.21	15:hsa;hsa-mir-627,16,37,-	0.391885	0.214151
hsa-miR-6507-5p	8	8	8	0.39	0.21	10:hsa;hsa-mir-6507,6,26,-	0.391885	0.214151
hsa-miR-4709-3p	6	8	8	0.39	0.21	14:hsa;hsa-mir-4709,48,70,-	0.391885	0.214151
hsa-miR-6815-5p	5	8	8	0.39	0.21	21:hsa;hsa-mir-6815,6,28,+	0.391885	0.214151
hsv1-miR-H1-5p	8	8	4	0.39	0.21	JQ673480:hsv1;hsv1-mir-H1,15,35,+	0.195943	0.107075
hsa-miR-4443	6	8	8	0.39	0.21	3:hsa;hsa-mir-4443,9,25,+	0.391885	0.214151
hsa-miR-10b-3p	5	8	8	0.39	0.21	2:hsa;hsa-mir-10b,66,87,+	0.391885	0.214151
hsa-miR-4781-3p	7	8	8	0.39	0.21	1:hsa;hsa-mir-4781,46,67,+	0.391885	0.214151
hsa-miR-4426	8	8	8	0.39	0.21	1:hsa;hsa-mir-4426,6,22,+	0.391885	0.214151
hsa-miR-6854-5p	4	8	8	0.39	0.21	9:hsa;hsa-mir-6854,6,29,-	0.391885	0.214151
hsa-miR-4755-5p	4	8	8	0.39	0.21	20:hsa;hsa-mir-4755,10,31,+	0.391885	0.214151
hsa-miR-766-5p	4	8	8	0.39	0.21	X:hsa;hsa-mir-766,29,50,-	0.391885	0.214151
hsa-miR-4731-5p	6	8	8	0.39	0.21	17:hsa;hsa-mir-4731,10,31,-	0.391885	0.214151
hsa-miR-3935	7	8	8	0.39	0.21	16:hsa;hsa-mir-3935,58,79,+	0.391885	0.214151
hsv1-miR-H17a	4	8	2	0.39	0.21	JQ673480:hsv1;hsv1-mir-H17a,63,83,+	0.0979713	0.0535376
hsv1-miR-H17	4	8	2	0.39	0.21	JQ673480:hsv1;hsv1-mir-H17a,63,83,+	0.0979713	0.0535376
hsa-miR-19b-1-5p	5	8	8	0.39	0.21	13:hsa;hsa-mir-19b-1,16,38,+	0.391885	0.214151
hsa-miR-6882-5p	6	8	8	0.39	0.21	15:hsa;hsa-mir-6882,6,27,-	0.391885	0.214151
hsa-miR-1973	7	8	8	0.39	0.21	4:hsa;hsa-mir-1973,26,44,+	0.391885	0.214151
hsa-miR-4660	5	8	8	0.39	0.21	8:hsa;hsa-mir-4660,9,31,+	0.391885	0.214151
hsa-miR-190a-5p	8	8	8	0.39	0.21	15:hsa;hsa-mir-190a,15,36,+	0.391885	0.214151
hsv1-miR-H1-5p	8	8	4	0.39	0.21	JQ673480:hsv1;hsv1-mir-H1,15,35,-	0.195943	0.107075
hsa-miR-6811-5p	4	7	7	0.34	0.19	2:hsa;hsa-mir-6811,2,23,+	0.3429	0.187382
hsa-miR-372-3p	3	7	7	0.34	0.19	19:hsa;hsa-mir-372,42,64,+	0.3429	0.187382
hsa-miR-3155a	3	7	7	0.34	0.19	10:hsa;hsa-mir-3155a,52,72,+	0.3429	0.187382
hsa-miR-301b-5p	6	7	7	0.34	0.19	22:hsa;hsa-mir-301b,10,31,+	0.3429	0.187382
hsa-miR-320d	2	7	0.97	0.34	0.19	X:hsa;hsa-mir-320d-2,30,48,-	0.0474306	0.025919
hsa-miR-18b-5p	5	7	3.5	0.34	0.19	X:hsa;hsa-mir-18b,6,28,-	0.17145	0.0936909
hsa-miR-3181	6	7	7	0.34	0.19	16:hsa;hsa-mir-3181,9,27,+	0.3429	0.187382
hsa-miR-1234-3p	7	7	7	0.34	0.19	8:hsa;hsa-mir-1234,57,78,-	0.3429	0.187382
hsa-miR-5094	6	7	7	0.34	0.19	15:hsa;hsa-mir-5094,11,32,-	0.3429	0.187382
hsa-miR-4743-5p	6	7	7	0.34	0.19	18:hsa;hsa-mir-4743,3,25,+	0.3429	0.187382
hsa-miR-26a-1-3p	4	7	6.5	0.34	0.19	3:hsa;hsa-mir-26a-1,49,70,+	0.318407	0.173997
hsa-miR-3191-3p	4	7	7	0.34	0.19	19:hsa;hsa-mir-3191,46,68,-	0.3429	0.187382
hsa-miR-3684	6	7	7	0.34	0.19	4:hsa;hsa-mir-3684,48,68,+	0.3429	0.187382
hsa-miR-1247-5p	6	7	7	0.34	0.19	14:hsa;hsa-mir-1247,40,61,-	0.3429	0.187382
hsa-miR-1226-3p	4	7	7	0.34	0.19	3:hsa;hsa-mir-1226,54,75,+	0.3429	0.187382
hsa-miR-320d	2	7	0.97	0.34	0.19	13:hsa;hsa-mir-320d-1,30,48,-	0.0474306	0.025919
hsa-miR-3126-3p	6	7	7	0.34	0.19	2:hsa;hsa-mir-3126,46,67,+	0.3429	0.187382
hsa-miR-556-3p	3	7	7	0.34	0.19	1:hsa;hsa-mir-556,55,76,+	0.3429	0.187382
hsa-miR-4797-3p	6	6	6	0.29	0.16	3:hsa;hsa-mir-4797,41,61,-	0.293914	0.160613
hsa-miR-3911	3	6	6	0.29	0.16	9:hsa;hsa-mir-3911,12,33,-	0.293914	0.160613
hsa-miR-410-5p	4	6	6	0.29	0.16	14:hsa;hsa-mir-410,14,34,+	0.293914	0.160613
hsa-miR-5579-5p	2	6	6	0.29	0.16	11:hsa;hsa-mir-5579,1,21,-	0.293914	0.160613
hsa-miR-5579-3p	3	6	6	0.29	0.16	11:hsa;hsa-mir-5579,37,58,-	0.293914	0.160613
hsa-miR-6087	6	6	6	0.29	0.16	X:hsa;hsa-mir-6087,3,20,+	0.293914	0.160613
hsa-miR-636	6	6	6	0.29	0.16	17:hsa;hsa-mir-636,61,83,-	0.293914	0.160613
hsa-miR-509-3-5p	2	6	6	0.29	0.16	X:hsa;hsa-mir-509-3,10,31,-	0.293914	0.160613
hsa-miR-4795-3p	3	6	6	0.29	0.16	3:hsa;hsa-mir-4795,58,79,-	0.293914	0.160613
hsa-miR-4536-5p	4	6	3	0.29	0.16	X:hsa;hsa-mir-4536-1,2,22,-	0.146957	0.0803065
hsa-miR-3120-3p	5	6	6	0.29	0.16	1:hsa;hsa-mir-3120,51,71,+	0.293914	0.160613
hsa-miR-3127-5p	5	6	6	0.29	0.16	2:hsa;hsa-mir-3127,11,33,+	0.293914	0.160613
hsa-miR-4687-3p	6	6	6	0.29	0.16	11:hsa;hsa-mir-4687,52,72,+	0.293914	0.160613
hsa-miR-433-5p	4	6	6	0.29	0.16	14:hsa;hsa-mir-433,12,33,+	0.293914	0.160613
hsa-miR-3619-5p	5	6	6	0.29	0.16	22:hsa;hsa-mir-3619,16,37,+	0.293914	0.160613
hsa-miR-514a-3p	4	6	1.2	0.29	0.16	X:hsa;hsa-mir-514a-1,59,79,-	0.0587828	0.0321226
hsa-miR-3189-3p	5	6	6	0.29	0.16	19:hsa;hsa-mir-3189,46,66,+	0.293914	0.160613
hsa-miR-6508-3p	5	6	6	0.29	0.16	21:hsa;hsa-mir-6508,37,58,+	0.293914	0.160613
hsa-miR-514a-3p	4	6	1.2	0.29	0.16	X:hsa;hsa-mir-514a-2,54,74,-	0.0587828	0.0321226
hsa-miR-561-3p	3	6	6	0.29	0.16	2:hsa;hsa-mir-561,61,82,+	0.293914	0.160613
hsa-miR-101-5p	5	6	6	0.29	0.16	1:hsa;hsa-mir-101-1,11,32,-	0.293914	0.160613
hsa-miR-1243	4	6	6	0.29	0.16	4:hsa;hsa-mir-1243,5,26,+	0.293914	0.160613
hsa-miR-5581-3p	3	6	6	0.29	0.16	1:hsa;hsa-mir-5581,39,60,-	0.293914	0.160613
hsa-miR-3139	3	6	6	0.29	0.16	4:hsa;hsa-mir-3139,10,32,+	0.293914	0.160613
hsa-miR-514a-3p	4	6	1.2	0.29	0.16	X:hsa;hsa-mir-514a-2,54,74,-	0.0587828	0.0321226
hsa-miR-432-3p	2	6	6	0.29	0.16	14:hsa;hsa-mir-432,62,82,+	0.293914	0.160613
hsa-miR-6892-5p	5	6	6	0.29	0.16	7:hsa;hsa-mir-6892,1,21,+	0.293914	0.160613
hsa-miR-7845-5p	5	6	6	0.29	0.16	2:hsa;hsa-mir-7845,3,23,+	0.293914	0.160613
hsa-miR-4804-5p	5	6	6	0.29	0.16	5:hsa;hsa-mir-4804,10,30,+	0.293914	0.160613
hsa-miR-1343-5p	5	6	6	0.29	0.16	11:hsa;hsa-mir-1343,15,36,+	0.293914	0.160613
hsa-miR-4536-5p	4	6	3	0.29	0.16	X:hsa;hsa-mir-4536-2,2,22,+	0.146957	0.0803065
hsa-miR-6726-5p	3	6	6	0.29	0.16	1:hsa;hsa-mir-6726,6,26,-	0.293914	0.160613
hsa-miR-514a-3p	4	6	1.2	0.29	0.16	X:hsa;hsa-mir-514a-3,54,74,-	0.0587828	0.0321226
hsa-miR-3918	3	6	6	0.29	0.16	6:hsa;hsa-mir-3918,19,39,-	0.293914	0.160613
hsa-miR-514a-3p	4	6	1.2	0.29	0.16	X:hsa;hsa-mir-514a-3,54,74,-	0.0587828	0.0321226
hsa-miR-5004-3p	5	6	6	0.29	0.16	6:hsa;hsa-mir-5004,67,88,+	0.293914	0.160613
hsa-miR-1254	6	6	3	0.29	0.16	10:hsa;hsa-mir-1254-1,18,41,+	0.146957	0.0803065
hsa-miR-3126-5p	4	6	6	0.29	0.16	2:hsa;hsa-mir-3126,10,31,+	0.293914	0.160613
hsa-miR-1254	6	6	3	0.29	0.16	10:hsa;hsa-mir-1254-2,4,27,+	0.146957	0.0803065
hsa-miR-6818-5p	3	6	6	0.29	0.16	22:hsa;hsa-mir-6818,6,27,+	0.293914	0.160613
hsa-miR-4498	6	6	6	0.29	0.16	12:hsa;hsa-mir-4498,6,27,-	0.293914	0.160613
hsa-miR-3648	4	5	1.25	0.24	0.13	21:hsa;hsa-mir-3648-2,28,48,+	0.0612321	0.033461
hsa-miR-6509-3p	4	5	5	0.24	0.13	7:hsa;hsa-mir-6509,52,73,-	0.244928	0.133844
hsa-miR-4794	1	5	5	0.24	0.13	1:hsa;hsa-mir-4794,9,30,+	0.244928	0.133844
hsa-miR-3064-3p	3	5	5	0.24	0.13	17:hsa;hsa-mir-3064,43,65,-	0.244928	0.133844
hsa-miR-3136-5p	4	5	5	0.24	0.13	3:hsa;hsa-mir-3136,10,32,-	0.244928	0.133844
hsa-miR-3166	4	5	5	0.24	0.13	11:hsa;hsa-mir-3166,60,82,+	0.244928	0.133844
hsa-miR-2116-5p	5	5	5	0.24	0.13	15:hsa;hsa-mir-2116,14,34,-	0.244928	0.133844
hsa-miR-6770-5p	5	5	0.56	0.24	0.13	16:hsa;hsa-mir-6770-2,6,29,-	0.0272143	0.0148716
hsa-miR-4689	4	5	5	0.24	0.13	1:hsa;hsa-mir-4689,10,31,-	0.244928	0.133844
hsa-miR-6770-5p	5	5	0.56	0.24	0.13	16:hsa;hsa-mir-6770-3,6,29,-	0.0272143	0.0148716
hsa-miR-3681-5p	5	5	5	0.24	0.13	2:hsa;hsa-mir-3681,9,30,+	0.244928	0.133844
hsa-miR-6743-3p	5	5	5	0.24	0.13	11:hsa;hsa-mir-6743,48,70,+	0.244928	0.133844
hsa-miR-6724-5p	5	5	0.18	0.24	0.13	GL000220.1:hsa;hsa-mir-6724-1,11,33,+	0.00874744	0.00478015
hsa-miR-6724-5p	5	5	0.18	0.24	0.13	21:hsa;hsa-mir-6724-1,11,33,+	0.00874744	0.00478015
hsa-miR-588	4	5	5	0.24	0.13	6:hsa;hsa-mir-588,16,36,+	0.244928	0.133844
hsa-miR-4699-3p	4	5	5	0.24	0.13	12:hsa;hsa-mir-4699,46,67,+	0.244928	0.133844
hsa-miR-4768-5p	4	5	5	0.24	0.13	X:hsa;hsa-mir-4768,9,30,+	0.244928	0.133844
hsa-miR-4742-5p	4	5	5	0.24	0.13	1:hsa;hsa-mir-4742,1,23,-	0.244928	0.133844
hsa-miR-4742-3p	4	5	5	0.24	0.13	1:hsa;hsa-mir-4742,63,85,-	0.244928	0.133844
hsa-miR-6724-5p	5	5	0.18	0.24	0.13	21:hsa;hsa-mir-6724-4,11,33,+	0.00874744	0.00478015
hsa-miR-3680-5p	5	5	1.25	0.24	0.13	16:hsa;hsa-mir-3680-2,14,35,-	0.0612321	0.033461
hsa-miR-6724-5p	5	5	0.18	0.24	0.13	GL000220.1:hsa;hsa-mir-6724-3,11,33,+	0.00874744	0.00478015
hsa-miR-592	2	5	5	0.24	0.13	7:hsa;hsa-mir-592,16,37,-	0.244928	0.133844
hsa-miR-3648	4	5	1.25	0.24	0.13	21:hsa;hsa-mir-3648-1,28,48,+	0.0612321	0.033461
hsa-miR-4527	1	5	5	0.24	0.13	18:hsa;hsa-mir-4527,8,29,+	0.244928	0.133844
hsa-miR-6852-3p	5	5	5	0.24	0.13	9:hsa;hsa-mir-6852,42,58,-	0.244928	0.133844
hsa-miR-6770-5p	5	5	0.56	0.24	0.13	16:hsa;hsa-mir-6770-3,6,29,+	0.0272143	0.0148716
hsa-miR-548ao-3p	5	5	5	0.24	0.13	8:hsa;hsa-mir-548ao,58,79,-	0.244928	0.133844
hsa-miR-4676-5p	5	5	5	0.24	0.13	10:hsa;hsa-mir-4676,10,30,+	0.244928	0.133844
hsa-miR-6724-5p	5	5	0.18	0.24	0.13	21:hsa;hsa-mir-6724-1,11,33,+	0.00874744	0.00478015
hsa-miR-3619-3p	4	5	5	0.24	0.13	22:hsa;hsa-mir-3619,47,68,+	0.244928	0.133844
hsa-miR-6724-5p	5	5	0.18	0.24	0.13	21:hsa;hsa-mir-6724-3,11,33,+	0.00874744	0.00478015
hsa-miR-6724-5p	5	5	0.18	0.24	0.13	KI270733.1:hsa;hsa-mir-6724-4,11,33,+	0.00874744	0.00478015
hsa-miR-4738-3p	3	5	5	0.24	0.13	17:hsa;hsa-mir-4738,57,78,-	0.244928	0.133844
hsa-miR-770-5p	4	5	5	0.24	0.13	14:hsa;hsa-mir-770,20,42,+	0.244928	0.133844
hsa-miR-6724-5p	5	5	0.18	0.24	0.13	21:hsa;hsa-mir-6724-3,11,33,+	0.00874744	0.00478015
hsa-miR-3165	2	5	5	0.24	0.13	11:hsa;hsa-mir-3165,10,31,-	0.244928	0.133844
hsa-miR-4440	4	5	5	0.24	0.13	2:hsa;hsa-mir-4440,65,86,-	0.244928	0.133844
hsa-miR-3177-5p	4	5	5	0.24	0.13	16:hsa;hsa-mir-3177,11,33,+	0.244928	0.133844
hsa-miR-2278	4	5	5	0.24	0.13	9:hsa;hsa-mir-2278,16,37,+	0.244928	0.133844
hsa-miR-4796-3p	2	5	5	0.24	0.13	3:hsa;hsa-mir-4796,53,74,-	0.244928	0.133844
hsa-miR-6724-5p	5	5	0.18	0.24	0.13	GL000220.1:hsa;hsa-mir-6724-4,11,33,+	0.00874744	0.00478015
hsa-miR-1288-3p	3	5	5	0.24	0.13	17:hsa;hsa-mir-1288,45,65,+	0.244928	0.133844
hsa-miR-302b-3p	3	5	5	0.24	0.13	4:hsa;hsa-mir-302b,47,69,-	0.244928	0.133844
hsa-miR-3648	4	5	1.25	0.24	0.13	21:hsa;hsa-mir-3648-2,28,48,+	0.0612321	0.033461
hsa-miR-6770-5p	5	5	0.56	0.24	0.13	16:hsa;hsa-mir-6770-1,6,29,+	0.0272143	0.0148716
hsa-miR-6724-5p	5	5	0.18	0.24	0.13	GL000220.1:hsa;hsa-mir-6724-3,11,33,+	0.00874744	0.00478015
hsa-miR-6724-5p	5	5	0.18	0.24	0.13	21:hsa;hsa-mir-6724-4,11,33,+	0.00874744	0.00478015
hsa-miR-6724-5p	5	5	0.18	0.24	0.13	GL000220.1:hsa;hsa-mir-6724-2,11,33,+	0.00874744	0.00478015
hsa-miR-33b-5p	4	5	4.5	0.24	0.13	17:hsa;hsa-mir-33b,16,35,-	0.220435	0.12046
hsa-miR-4479	2	5	5	0.24	0.13	9:hsa;hsa-mir-4479,45,66,+	0.244928	0.133844
hsa-miR-3680-5p	5	5	1.25	0.24	0.13	16:hsa;hsa-mir-3680-2,14,35,-	0.0612321	0.033461
hsa-miR-6724-5p	5	5	0.18	0.24	0.13	21:hsa;hsa-mir-6724-3,11,33,+	0.00874744	0.00478015
hsa-miR-615-5p	3	5	5	0.24	0.13	12:hsa;hsa-mir-615,18,39,+	0.244928	0.133844
hsa-miR-4803	4	5	5	0.24	0.13	5:hsa;hsa-mir-4803,10,30,+	0.244928	0.133844
hsa-miR-3175	2	5	5	0.24	0.13	15:hsa;hsa-mir-3175,10,31,+	0.244928	0.133844
hsa-miR-6770-5p	5	5	0.56	0.24	0.13	16:hsa;hsa-mir-6770-2,6,29,+	0.0272143	0.0148716
hsa-miR-3680-5p	5	5	1.25	0.24	0.13	16:hsa;hsa-mir-3680-1,14,35,-	0.0612321	0.033461
hsa-miR-6724-5p	5	5	0.18	0.24	0.13	21:hsa;hsa-mir-6724-3,11,33,+	0.00874744	0.00478015
hsa-miR-6724-5p	5	5	0.18	0.24	0.13	21:hsa;hsa-mir-6724-1,11,33,+	0.00874744	0.00478015
hsa-miR-6724-5p	5	5	0.18	0.24	0.13	GL000220.1:hsa;hsa-mir-6724-4,11,33,+	0.00874744	0.00478015
hsa-miR-6770-5p	5	5	0.56	0.24	0.13	16:hsa;hsa-mir-6770-2,6,29,+	0.0272143	0.0148716
hsa-miR-3143	3	5	5	0.24	0.13	6:hsa;hsa-mir-3143,4,28,+	0.244928	0.133844
hsa-miR-451a	3	5	5	0.24	0.13	17:hsa;hsa-mir-451a,17,38,-	0.244928	0.133844
hsa-miR-6724-5p	5	5	0.18	0.24	0.13	KI270733.1:hsa;hsa-mir-6724-2,11,33,+	0.00874744	0.00478015
hsa-miR-935	4	5	5	0.24	0.13	19:hsa;hsa-mir-935,56,78,+	0.244928	0.133844
hsa-miR-590-5p	3	5	5	0.24	0.13	7:hsa;hsa-mir-590,16,37,+	0.244928	0.133844
hsa-miR-3680-5p	5	5	1.25	0.24	0.13	16:hsa;hsa-mir-3680-1,14,35,-	0.0612321	0.033461
hsa-miR-6724-5p	5	5	0.18	0.24	0.13	21:hsa;hsa-mir-6724-2,11,33,+	0.00874744	0.00478015
hsa-miR-7155-3p	5	5	5	0.24	0.13	11:hsa;hsa-mir-7155,38,56,-	0.244928	0.133844
hsa-miR-5002-5p	5	5	5	0.24	0.13	3:hsa;hsa-mir-5002,21,44,+	0.244928	0.133844
hsa-miR-6724-5p	5	5	0.18	0.24	0.13	21:hsa;hsa-mir-6724-1,11,33,+	0.00874744	0.00478015
hsa-miR-664b-5p	4	5	5	0.24	0.13	X:hsa;hsa-mir-664b,1,24,+	0.244928	0.133844
hsa-miR-4649-5p	5	5	5	0.24	0.13	7:hsa;hsa-mir-4649,3,26,+	0.244928	0.133844
hsa-miR-6724-5p	5	5	0.18	0.24	0.13	21:hsa;hsa-mir-6724-2,11,33,+	0.00874744	0.00478015
hsa-miR-6724-5p	5	5	0.18	0.24	0.13	21:hsa;hsa-mir-6724-2,11,33,+	0.00874744	0.00478015
hsa-miR-3648	4	5	1.25	0.24	0.13	21:hsa;hsa-mir-3648-1,28,48,+	0.0612321	0.033461
hsa-miR-141-3p	2	5	5	0.24	0.13	12:hsa;hsa-mir-141,59,80,+	0.244928	0.133844
hsa-miR-6724-5p	5	5	0.18	0.24	0.13	KI270733.1:hsa;hsa-mir-6724-3,11,33,+	0.00874744	0.00478015
hsa-miR-6770-5p	5	5	0.56	0.24	0.13	16:hsa;hsa-mir-6770-1,6,29,+	0.0272143	0.0148716
hsa-miR-6724-5p	5	5	0.18	0.24	0.13	GL000220.1:hsa;hsa-mir-6724-2,11,33,+	0.00874744	0.00478015
hsa-miR-6724-5p	5	5	0.18	0.24	0.13	KI270733.1:hsa;hsa-mir-6724-1,11,33,+	0.00874744	0.00478015
hsa-miR-6724-5p	5	5	0.18	0.24	0.13	21:hsa;hsa-mir-6724-2,11,33,+	0.00874744	0.00478015
hsa-miR-4662a-5p	2	5	5	0.24	0.13	8:hsa;hsa-mir-4662a,6,27,+	0.244928	0.133844
hsa-miR-7854-3p	4	5	5	0.24	0.13	16:hsa;hsa-mir-7854,41,61,+	0.244928	0.133844
hsa-miR-4690-3p	3	5	5	0.24	0.13	11:hsa;hsa-mir-4690,39,59,+	0.244928	0.133844
hsa-miR-6770-5p	5	5	0.56	0.24	0.13	16:hsa;hsa-mir-6770-1,6,29,-	0.0272143	0.0148716
hsa-miR-4688	5	5	5	0.24	0.13	11:hsa;hsa-mir-4688,55,76,+	0.244928	0.133844
hsa-miR-151b	4	5	3	0.24	0.13	14:hsa;hsa-mir-151b,60,77,-	0.146957	0.0803065
hsa-miR-6724-5p	5	5	0.18	0.24	0.13	21:hsa;hsa-mir-6724-4,11,33,+	0.00874744	0.00478015
hsa-miR-6502-5p	4	5	5	0.24	0.13	12:hsa;hsa-mir-6502,10,31,+	0.244928	0.133844
hsa-miR-6770-5p	5	5	0.56	0.24	0.13	16:hsa;hsa-mir-6770-3,6,29,+	0.0272143	0.0148716
hsa-miR-6724-5p	5	5	0.18	0.24	0.13	GL000220.1:hsa;hsa-mir-6724-1,11,33,+	0.00874744	0.00478015
hsa-miR-6724-5p	5	5	0.18	0.24	0.13	21:hsa;hsa-mir-6724-4,11,33,+	0.00874744	0.00478015
hsa-miR-1267	2	4	4	0.2	0.11	13:hsa;hsa-mir-1267,12,32,-	0.195943	0.107075
hsa-miR-2276-3p	4	4	4	0.2	0.11	13:hsa;hsa-mir-2276,54,75,+	0.195943	0.107075
hsa-miR-6770-3p	4	4	0.44	0.2	0.11	16:hsa;hsa-mir-6770-2,40,60,-	0.0217714	0.0118973
hsa-miR-1908-3p	4	4	4	0.2	0.11	11:hsa;hsa-mir-1908,49,69,-	0.195943	0.107075
hsa-miR-15a-3p	1	4	4	0.2	0.11	13:hsa;hsa-mir-15a,51,72,-	0.195943	0.107075
hsa-miR-6770-3p	4	4	0.44	0.2	0.11	16:hsa;hsa-mir-6770-3,40,60,-	0.0217714	0.0118973
hsa-miR-219a-2-3p	3	4	4	0.2	0.11	9:hsa;hsa-mir-219a-2,62,83,-	0.195943	0.107075
hsa-miR-1257	4	4	4	0.2	0.11	20:hsa;hsa-mir-1257,22,42,-	0.195943	0.107075
hsa-miR-5697	2	4	4	0.2	0.11	1:hsa;hsa-mir-5697,10,31,+	0.195943	0.107075
hsa-miR-6511b-3p	4	4	1.25	0.2	0.11	16:hsa;hsa-mir-6511b-1,53,75,-	0.0612321	0.033461
hsa-miR-6721-5p	3	4	4	0.2	0.11	6:hsa;hsa-mir-6721,11,33,-	0.195943	0.107075
hsa-miR-552-3p	2	4	4	0.2	0.11	1:hsa;hsa-mir-552,61,81,-	0.195943	0.107075
hsa-miR-4449	4	4	4	0.2	0.11	4:hsa;hsa-mir-4449,39,60,+	0.195943	0.107075
hsa-miR-3193	1	4	4	0.2	0.11	20:hsa;hsa-mir-3193,1,22,+	0.195943	0.107075
hsa-miR-3682-3p	4	4	4	0.2	0.11	2:hsa;hsa-mir-3682,50,70,-	0.195943	0.107075
hsv1-miR-H2-3p	4	4	2	0.2	0.11	JQ673480:hsv1;hsv1-mir-H2,47,70,-	0.0979713	0.0535376
hsa-miR-10a-3p	2	4	4	0.2	0.11	17:hsa;hsa-mir-10a,63,84,-	0.195943	0.107075
hsa-miR-4757-3p	4	4	4	0.2	0.11	2:hsa;hsa-mir-4757,48,69,+	0.195943	0.107075
hsa-miR-550b-2-5p	4	4	1.7	0.2	0.11	7:hsa;hsa-mir-550b-2,16,37,-	0.0832756	0.045507
hsv1-miR-H1-3p	4	4	2	0.2	0.11	JQ673480:hsv1;hsv1-mir-H1,53,75,+	0.0979713	0.0535376
hsa-miR-6770-3p	4	4	0.44	0.2	0.11	16:hsa;hsa-mir-6770-3,40,60,+	0.0217714	0.0118973
hsa-miR-4707-3p	2	4	4	0.2	0.11	14:hsa;hsa-mir-4707,52,73,-	0.195943	0.107075
hsa-miR-3131	3	4	4	0.2	0.11	2:hsa;hsa-mir-3131,4,26,-	0.195943	0.107075
hsa-miR-150-5p	1	4	4	0.2	0.11	19:hsa;hsa-mir-150,16,37,-	0.195943	0.107075
hsa-miR-4510	3	4	1.1	0.2	0.11	15:hsa;hsa-mir-4510,8,29,+	0.0538842	0.0294457
hsa-miR-5189-3p	4	4	4	0.2	0.11	16:hsa;hsa-mir-5189,67,87,+	0.195943	0.107075
hsa-miR-6511b-3p	4	4	1.25	0.2	0.11	16:hsa;hsa-mir-6511b-1,53,75,-	0.0612321	0.033461
hsa-miR-3152-3p	3	4	4	0.2	0.11	9:hsa;hsa-mir-3152,45,66,+	0.195943	0.107075
hsa-miR-5188	3	4	4	0.2	0.11	12:hsa;hsa-mir-5188,64,86,+	0.195943	0.107075
hsa-miR-6785-5p	4	4	4	0.2	0.11	17:hsa;hsa-mir-6785,6,27,+	0.195943	0.107075
hsa-miR-589-3p	3	4	4	0.2	0.11	7:hsa;hsa-mir-589,61,84,-	0.195943	0.107075
hsa-miR-550b-2-5p	4	4	1.7	0.2	0.11	7:hsa;hsa-mir-550b-1,16,37,-	0.0832756	0.045507
hsa-miR-4439	4	4	4	0.2	0.11	2:hsa;hsa-mir-4439,4,25,-	0.195943	0.107075
hsa-miR-6770-3p	4	4	0.44	0.2	0.11	16:hsa;hsa-mir-6770-1,40,60,+	0.0217714	0.0118973
hsa-miR-3192-3p	3	4	4	0.2	0.11	20:hsa;hsa-mir-3192,48,68,+	0.195943	0.107075
hsa-miR-1286	4	4	4	0.2	0.11	22:hsa;hsa-mir-1286,47,67,-	0.195943	0.107075
hsa-miR-7705	2	4	4	0.2	0.11	8:hsa;hsa-mir-7705,1,23,-	0.195943	0.107075
hsa-miR-2467-5p	2	4	4	0.2	0.11	2:hsa;hsa-mir-2467,12,34,-	0.195943	0.107075
hsa-miR-6770-3p	4	4	0.44	0.2	0.11	16:hsa;hsa-mir-6770-2,40,60,+	0.0217714	0.0118973
hsa-miR-6770-3p	4	4	0.44	0.2	0.11	16:hsa;hsa-mir-6770-2,40,60,+	0.0217714	0.0118973
hsa-miR-5690	3	4	4	0.2	0.11	6:hsa;hsa-mir-5690,10,30,-	0.195943	0.107075
hsa-miR-676-3p	3	4	4	0.2	0.11	X:hsa;hsa-mir-676,43,63,+	0.195943	0.107075
hsa-miR-1537-5p	2	4	4	0.2	0.11	1:hsa;hsa-mir-1537,3,24,-	0.195943	0.107075
hsv1-miR-H2-3p	4	4	2	0.2	0.11	JQ673480:hsv1;hsv1-mir-H2,47,70,+	0.0979713	0.0535376
hsa-miR-412-3p	4	4	4	0.2	0.11	14:hsa;hsa-mir-412,54,76,+	0.195943	0.107075
hsa-miR-4511	4	4	4	0.2	0.11	15:hsa;hsa-mir-4511,15,36,-	0.195943	0.107075
hsa-miR-6821-5p	4	4	4	0.2	0.11	22:hsa;hsa-mir-6821,1,23,+	0.195943	0.107075
hsa-miR-3125	4	4	4	0.2	0.11	2:hsa;hsa-mir-3125,10,29,+	0.195943	0.107075
hsa-miR-3135a	3	4	4	0.2	0.11	3:hsa;hsa-mir-3135a,10,31,+	0.195943	0.107075
hsa-miR-6770-3p	4	4	0.44	0.2	0.11	16:hsa;hsa-mir-6770-1,40,60,+	0.0217714	0.0118973
hsa-miR-217	3	4	4	0.2	0.11	2:hsa;hsa-mir-217,35,57,-	0.195943	0.107075
hsv1-miR-H1-3p	4	4	2	0.2	0.11	JQ673480:hsv1;hsv1-mir-H1,53,75,-	0.0979713	0.0535376
hsa-miR-6770-3p	4	4	0.44	0.2	0.11	16:hsa;hsa-mir-6770-1,40,60,-	0.0217714	0.0118973
hsa-miR-6770-3p	4	4	0.44	0.2	0.11	16:hsa;hsa-mir-6770-3,40,60,+	0.0217714	0.0118973
hsa-miR-6837-3p	3	4	4	0.2	0.11	7:hsa;hsa-mir-6837,42,64,+	0.195943	0.107075
hsa-miR-3121-3p	3	3	3	0.15	0.08	1:hsa;hsa-mir-3121,47,68,-	0.146957	0.0803065
hsa-miR-6509-5p	3	3	3	0.15	0.08	7:hsa;hsa-mir-6509,15,35,-	0.146957	0.0803065
hsa-miR-4655-5p	3	3	3	0.15	0.08	7:hsa;hsa-mir-4655,10,31,-	0.146957	0.0803065
hsa-miR-6786-3p	3	3	3	0.15	0.08	17:hsa;hsa-mir-6786,88,110,+	0.146957	0.0803065
hsa-miR-4786-5p	3	3	3	0.15	0.08	2:hsa;hsa-mir-4786,11,32,-	0.146957	0.0803065
hsa-miR-6513-5p	3	3	3	0.15	0.08	2:hsa;hsa-mir-6513,3,25,-	0.146957	0.0803065
hsa-miR-4789-5p	3	3	3	0.15	0.08	3:hsa;hsa-mir-4789,13,34,+	0.146957	0.0803065
hsa-miR-4708-3p	3	3	3	0.15	0.08	14:hsa;hsa-mir-4708,40,61,-	0.146957	0.0803065
hsa-miR-6764-5p	2	3	3	0.15	0.08	14:hsa;hsa-mir-6764,6,27,+	0.146957	0.0803065
hsa-miR-4515	3	3	3	0.15	0.08	15:hsa;hsa-mir-4515,15,36,+	0.146957	0.0803065
hsa-miR-4712-5p	3	3	3	0.15	0.08	15:hsa;hsa-mir-4712,9,30,+	0.146957	0.0803065
hsa-miR-4767	3	3	3	0.15	0.08	X:hsa;hsa-mir-4767,10,32,+	0.146957	0.0803065
hsa-miR-6746-3p	3	3	3	0.15	0.08	11:hsa;hsa-mir-6746,42,63,-	0.146957	0.0803065
hsa-miR-635	2	3	3	0.15	0.08	17:hsa;hsa-mir-635,16,38,-	0.146957	0.0803065
hsa-miR-6762-5p	3	3	3	0.15	0.08	12:hsa;hsa-mir-6762,6,28,+	0.146957	0.0803065
hsa-miR-4679	3	3	1.5	0.15	0.08	10:hsa;hsa-mir-4679-2,10,31,-	0.0734785	0.0401532
hsa-miR-4421	3	3	3	0.15	0.08	1:hsa;hsa-mir-4421,43,64,+	0.146957	0.0803065
hsa-miR-4740-5p	3	3	3	0.15	0.08	17:hsa;hsa-mir-4740,5,26,-	0.146957	0.0803065
hsa-miR-198	2	3	3	0.15	0.08	3:hsa;hsa-mir-198,6,27,-	0.146957	0.0803065
hsa-miR-6511b-3p	3	3	0.75	0.15	0.08	16:hsa;hsa-mir-6511b-2,48,70,-	0.0367392	0.0200766
hsa-miR-4684-5p	2	3	3	0.15	0.08	1:hsa;hsa-mir-4684,14,35,+	0.146957	0.0803065
hsa-miR-3680-3p	3	3	0.75	0.15	0.08	16:hsa;hsa-mir-3680-2,50,72,-	0.0367392	0.0200766
hsa-miR-624-3p	3	3	3	0.15	0.08	14:hsa;hsa-mir-624,54,74,-	0.146957	0.0803065
hsa-miR-338-5p	1	3	3	0.15	0.08	17:hsa;hsa-mir-338,6,27,-	0.146957	0.0803065
hsa-miR-4679	3	3	1.5	0.15	0.08	10:hsa;hsa-mir-4679-1,9,30,+	0.0734785	0.0401532
hsa-miR-4707-5p	3	3	3	0.15	0.08	14:hsa;hsa-mir-4707,10,32,-	0.146957	0.0803065
hsa-miR-4637	3	3	3	0.15	0.08	5:hsa;hsa-mir-4637,60,81,-	0.146957	0.0803065
hsa-miR-144-5p	3	3	3	0.15	0.08	17:hsa;hsa-mir-144,15,36,-	0.146957	0.0803065
hsa-miR-144-3p	1	3	3	0.15	0.08	17:hsa;hsa-mir-144,52,71,-	0.146957	0.0803065
hsa-miR-6838-5p	2	3	3	0.15	0.08	7:hsa;hsa-mir-6838,6,27,-	0.146957	0.0803065
hsa-miR-4671-5p	1	3	3	0.15	0.08	1:hsa;hsa-mir-4671,10,31,+	0.146957	0.0803065
hsa-miR-3145-5p	2	3	3	0.15	0.08	6:hsa;hsa-mir-3145,12,33,-	0.146957	0.0803065
hsa-miR-3145-3p	3	3	3	0.15	0.08	6:hsa;hsa-mir-3145,49,72,-	0.146957	0.0803065
hsa-miR-4254	3	3	3	0.15	0.08	1:hsa;hsa-mir-4254,44,66,-	0.146957	0.0803065
hsa-miR-139-3p	2	3	3	0.15	0.08	11:hsa;hsa-mir-139,43,65,-	0.146957	0.0803065
hsa-miR-3115	3	3	3	0.15	0.08	1:hsa;hsa-mir-3115,6,25,+	0.146957	0.0803065
hsa-miR-1255a	3	3	3	0.15	0.08	4:hsa;hsa-mir-1255a,28,50,-	0.146957	0.0803065
hsa-miR-3919	3	3	3	0.15	0.08	3:hsa;hsa-mir-3919,55,75,+	0.146957	0.0803065
hsa-miR-3529-5p	2	3	3	0.15	0.08	15:hsa;hsa-mir-3529,10,31,-	0.146957	0.0803065
hsa-miR-6805-5p	3	3	3	0.15	0.08	19:hsa;hsa-mir-6805,6,27,+	0.146957	0.0803065
hsa-miR-4642	2	3	3	0.15	0.08	6:hsa;hsa-mir-4642,10,31,+	0.146957	0.0803065
hsa-miR-5696	3	3	3	0.15	0.08	2:hsa;hsa-mir-5696,4,25,+	0.146957	0.0803065
hsa-miR-6806-3p	3	3	3	0.15	0.08	19:hsa;hsa-mir-6806,43,64,+	0.146957	0.0803065
hsa-miR-3192-5p	2	3	3	0.15	0.08	20:hsa;hsa-mir-3192,10,32,+	0.146957	0.0803065
hsa-miR-6511b-3p	3	3	0.75	0.15	0.08	16:hsa;hsa-mir-6511b-2,48,70,-	0.0367392	0.0200766
hsa-miR-3680-3p	3	3	0.75	0.15	0.08	16:hsa;hsa-mir-3680-2,50,72,-	0.0367392	0.0200766
hsa-miR-6871-3p	3	3	3	0.15	0.08	20:hsa;hsa-mir-6871,35,56,+	0.146957	0.0803065
hsa-miR-7-2-3p	3	3	3	0.15	0.08	15:hsa;hsa-mir-7-2,72,93,+	0.146957	0.0803065
hsa-miR-3124-5p	2	3	3	0.15	0.08	1:hsa;hsa-mir-3124,7,27,+	0.146957	0.0803065
hsa-miR-1305	2	3	3	0.15	0.08	4:hsa;hsa-mir-1305,51,72,+	0.146957	0.0803065
hsa-miR-3680-3p	3	3	0.75	0.15	0.08	16:hsa;hsa-mir-3680-1,50,72,-	0.0367392	0.0200766
hsa-miR-1179	2	3	3	0.15	0.08	15:hsa;hsa-mir-1179,15,35,+	0.146957	0.0803065
hsa-miR-3130-3p	2	3	1.5	0.15	0.08	2:hsa;hsa-mir-3130-2,44,64,+	0.0734785	0.0401532
hsa-miR-5003-3p	3	3	3	0.15	0.08	5:hsa;hsa-mir-5003,58,78,+	0.146957	0.0803065
hsa-miR-3685	3	3	3	0.15	0.08	12:hsa;hsa-mir-3685,6,27,+	0.146957	0.0803065
hsa-miR-544b	2	3	3	0.15	0.08	3:hsa;hsa-mir-544b,48,69,+	0.146957	0.0803065
hsa-miR-6726-3p	3	3	3	0.15	0.08	1:hsa;hsa-mir-6726,42,61,-	0.146957	0.0803065
hsa-miR-3680-3p	3	3	0.75	0.15	0.08	16:hsa;hsa-mir-3680-1,50,72,-	0.0367392	0.0200766
hsa-miR-3130-3p	2	3	1.5	0.15	0.08	2:hsa;hsa-mir-3130-1,44,64,-	0.0734785	0.0401532
hsa-miR-187-3p	2	3	3	0.15	0.08	18:hsa;hsa-mir-187,71,92,-	0.146957	0.0803065
hsa-miR-2682-3p	3	3	3	0.15	0.08	1:hsa;hsa-mir-2682,60,81,-	0.146957	0.0803065
hsa-miR-4722-5p	3	3	3	0.15	0.08	16:hsa;hsa-mir-4722,1,23,-	0.146957	0.0803065
hsa-miR-6855-3p	3	3	3	0.15	0.08	9:hsa;hsa-mir-6855,46,67,+	0.146957	0.0803065
hsa-miR-6772-3p	3	3	3	0.15	0.08	16:hsa;hsa-mir-6772,41,63,-	0.146957	0.0803065
hsa-miR-6715a-3p	1	3	3	0.15	0.08	10:hsa;hsa-mir-6715a,49,69,+	0.146957	0.0803065
hsa-miR-4788	2	3	3	0.15	0.08	3:hsa;hsa-mir-4788,10,31,+	0.146957	0.0803065
hsa-miR-4706	2	3	3	0.15	0.08	14:hsa;hsa-mir-4706,10,34,+	0.146957	0.0803065
hsa-miR-5010-5p	3	3	3	0.15	0.08	17:hsa;hsa-mir-5010,21,42,+	0.146957	0.0803065
hsa-miR-6753-3p	2	3	3	0.15	0.08	11:hsa;hsa-mir-6753,139,160,+	0.146957	0.0803065
hsa-miR-4728-3p	2	3	3	0.15	0.08	17:hsa;hsa-mir-4728,43,67,+	0.146957	0.0803065
hsa-miR-4792	2	3	3	0.15	0.08	3:hsa;hsa-mir-4792,7,24,-	0.146957	0.0803065
hsa-miR-4672	3	3	3	0.15	0.08	9:hsa;hsa-mir-4672,51,71,-	0.146957	0.0803065
hsa-miR-570-3p	1	3	3	0.15	0.08	3:hsa;hsa-mir-570,60,81,+	0.146957	0.0803065
hsa-miR-4680-5p	2	3	3	0.15	0.08	10:hsa;hsa-mir-4680,5,27,+	0.146957	0.0803065
hsa-miR-3916	3	3	3	0.15	0.08	1:hsa;hsa-mir-3916,20,45,-	0.146957	0.0803065
hsa-miR-6780a-5p	3	3	3	0.15	0.08	17:hsa;hsa-mir-6780a,6,28,-	0.146957	0.0803065
hsa-miR-6734-5p	3	3	3	0.15	0.08	1:hsa;hsa-mir-6734,6,28,-	0.146957	0.0803065
hsa-miR-129-1-3p	2	3	3	0.15	0.08	7:hsa;hsa-mir-129-1,49,70,+	0.146957	0.0803065
hsa-miR-3692-3p	3	3	3	0.15	0.08	6:hsa;hsa-mir-3692,44,67,+	0.146957	0.0803065
hsa-miR-4802-3p	2	3	3	0.15	0.08	4:hsa;hsa-mir-4802,47,69,-	0.146957	0.0803065
hsa-miR-6741-3p	2	3	3	0.15	0.08	1:hsa;hsa-mir-6741,42,63,-	0.146957	0.0803065
hsa-miR-4797-5p	1	2	2	0.1	0.05	3:hsa;hsa-mir-4797,10,30,-	0.0979713	0.0535376
hsa-miR-4798-5p	2	2	2	0.1	0.05	4:hsa;hsa-mir-4798,10,31,+	0.0979713	0.0535376
hsa-miR-548aw	2	2	2	0.1	0.05	9:hsa;hsa-mir-548aw,8,27,+	0.0979713	0.0535376
hsa-miR-4745-5p	1	2	2	0.1	0.05	19:hsa;hsa-mir-4745,2,24,+	0.0979713	0.0535376
hsa-miR-6747-5p	2	2	2	0.1	0.05	11:hsa;hsa-mir-6747,6,29,-	0.0979713	0.0535376
hsa-miR-3942-3p	1	2	2	0.1	0.05	15:hsa;hsa-mir-3942,65,85,-	0.0979713	0.0535376
hsa-miR-6779-5p	2	2	2	0.1	0.05	17:hsa;hsa-mir-6779,6,26,+	0.0979713	0.0535376
hsa-miR-6748-5p	2	2	2	0.1	0.05	11:hsa;hsa-mir-6748,6,27,+	0.0979713	0.0535376
hsa-miR-3065-3p	1	2	2	0.1	0.05	17:hsa;hsa-mir-3065,50,72,+	0.0979713	0.0535376
hsa-miR-1249-5p	2	2	2	0.1	0.05	22:hsa;hsa-mir-1249,4,27,-	0.0979713	0.0535376
hsa-miR-3202	1	2	1	0.1	0.05	X:hsa;hsa-mir-3202-1,9,30,+	0.0489857	0.0267688
hsa-miR-1284	2	2	2	0.1	0.05	3:hsa;hsa-mir-1284,30,51,-	0.0979713	0.0535376
hsa-miR-3202	1	2	1	0.1	0.05	X:hsa;hsa-mir-3202-2,8,29,-	0.0489857	0.0267688
hsa-miR-6800-3p	2	2	2	0.1	0.05	19:hsa;hsa-mir-6800,59,79,+	0.0979713	0.0535376
hsa-miR-6850-5p	1	2	2	0.1	0.05	8:hsa;hsa-mir-6850,1,22,-	0.0979713	0.0535376
hsa-miR-219a-5p	2	2	1	0.1	0.05	9:hsa;hsa-mir-219a-2,19,39,-	0.0489857	0.0267688
hsa-miR-6746-5p	2	2	2	0.1	0.05	11:hsa;hsa-mir-6746,6,27,-	0.0979713	0.0535376
hsa-miR-627-3p	2	2	2	0.1	0.05	15:hsa;hsa-mir-627,55,74,-	0.0979713	0.0535376
hsa-miR-1283	1	2	1	0.1	0.05	19:hsa;hsa-mir-1283-2,14,35,+	0.0489857	0.0267688
hsa-miR-3654	2	2	2	0.1	0.05	7:hsa;hsa-mir-3654,38,56,-	0.0979713	0.0535376
hsa-miR-6750-5p	2	2	2	0.1	0.05	11:hsa;hsa-mir-6750,6,29,-	0.0979713	0.0535376
hsa-miR-6762-3p	2	2	2	0.1	0.05	12:hsa;hsa-mir-6762,64,86,+	0.0979713	0.0535376
hsa-miR-4669	2	2	2	0.1	0.05	9:hsa;hsa-mir-4669,39,60,+	0.0979713	0.0535376
hsa-miR-6825-5p	2	2	2	0.1	0.05	3:hsa;hsa-mir-6825,6,27,-	0.0979713	0.0535376
hsa-miR-4695-3p	2	2	2	0.1	0.05	1:hsa;hsa-mir-4695,51,72,-	0.0979713	0.0535376
hsa-miR-3120-5p	2	2	2	0.1	0.05	1:hsa;hsa-mir-3120,13,33,+	0.0979713	0.0535376
hsa-miR-500b-5p	2	2	1	0.1	0.05	X:hsa;hsa-mir-500b,11,28,+	0.0489857	0.0267688
hsa-miR-135b-3p	2	2	2	0.1	0.05	1:hsa;hsa-mir-135b,55,76,-	0.0979713	0.0535376
hsa-miR-4773	1	2	1	0.1	0.05	2:hsa;hsa-mir-4773-2,48,69,-	0.0489857	0.0267688
hsa-miR-6815-3p	2	2	2	0.1	0.05	21:hsa;hsa-mir-6815,41,61,+	0.0979713	0.0535376
hsa-miR-155-3p	2	2	2	0.1	0.05	21:hsa;hsa-mir-155,43,64,+	0.0979713	0.0535376
hsa-miR-5588-5p	2	2	2	0.1	0.05	3:hsa;hsa-mir-5588,1,21,-	0.0979713	0.0535376
hsa-miR-4757-5p	1	2	2	0.1	0.05	2:hsa;hsa-mir-4757,11,33,+	0.0979713	0.0535376
hsa-miR-4504	1	2	2	0.1	0.05	14:hsa;hsa-mir-4504,55,76,-	0.0979713	0.0535376
hsa-miR-1283	1	2	1	0.1	0.05	19:hsa;hsa-mir-1283-1,14,35,+	0.0489857	0.0267688
hsa-miR-4466	2	2	2	0.1	0.05	6:hsa;hsa-mir-4466,5,22,-	0.0979713	0.0535376
hsa-miR-3675-3p	2	2	1	0.1	0.05	KI270714.1:hsa;hsa-mir-3675,43,64,+	0.0489857	0.0267688
hsa-miR-4523	2	2	2	0.1	0.05	17:hsa;hsa-mir-4523,7,27,+	0.0979713	0.0535376
hsa-miR-6742-5p	2	2	2	0.1	0.05	1:hsa;hsa-mir-6742,6,27,-	0.0979713	0.0535376
hsa-miR-3146	2	2	2	0.1	0.05	7:hsa;hsa-mir-3146,50,71,-	0.0979713	0.0535376
hsa-miR-133a-5p	2	2	1	0.1	0.05	18:hsa;hsa-mir-133a-1,16,37,-	0.0489857	0.0267688
hsa-miR-6777-5p	2	2	2	0.1	0.05	17:hsa;hsa-mir-6777,6,28,-	0.0979713	0.0535376
hsa-miR-3173-3p	2	2	2	0.1	0.05	14:hsa;hsa-mir-3173,43,64,-	0.0979713	0.0535376
hsa-miR-7106-5p	2	2	2	0.1	0.05	12:hsa;hsa-mir-7106,6,25,-	0.0979713	0.0535376
hsa-miR-598-5p	2	2	2	0.1	0.05	8:hsa;hsa-mir-598,24,46,-	0.0979713	0.0535376
hsa-miR-6766-5p	2	2	2	0.1	0.05	15:hsa;hsa-mir-6766,6,29,-	0.0979713	0.0535376
hsa-miR-758-5p	2	2	2	0.1	0.05	14:hsa;hsa-mir-758,15,36,+	0.0979713	0.0535376
hsa-miR-5189-5p	2	2	2	0.1	0.05	16:hsa;hsa-mir-5189,26,49,+	0.0979713	0.0535376
hsa-miR-133a-5p	2	2	1	0.1	0.05	20:hsa;hsa-mir-133a-2,22,43,+	0.0489857	0.0267688
hsa-miR-6757-5p	2	2	2	0.1	0.05	12:hsa;hsa-mir-6757,6,27,+	0.0979713	0.0535376
hsa-miR-4773	1	2	1	0.1	0.05	2:hsa;hsa-mir-4773-1,48,69,+	0.0489857	0.0267688
hsa-miR-3074-3p	1	2	2	0.1	0.05	9:hsa;hsa-mir-3074,50,71,-	0.0979713	0.0535376
hsa-miR-492	2	2	2	0.1	0.05	12:hsa;hsa-mir-492,30,52,+	0.0979713	0.0535376
hsa-miR-422a	2	2	2	0.1	0.05	15:hsa;hsa-mir-422a,10,31,-	0.0979713	0.0535376
hsa-miR-5680	2	2	2	0.1	0.05	8:hsa;hsa-mir-5680,52,73,+	0.0979713	0.0535376
hsa-miR-1273c	2	2	2	0.1	0.05	6:hsa;hsa-mir-1273c,10,31,+	0.0979713	0.0535376
hsa-miR-5683	2	2	2	0.1	0.05	6:hsa;hsa-mir-5683,10,33,+	0.0979713	0.0535376
hsa-miR-216a-3p	2	2	2	0.1	0.05	2:hsa;hsa-mir-216a,58,79,-	0.0979713	0.0535376
hsa-miR-1252-5p	2	2	2	0.1	0.05	12:hsa;hsa-mir-1252,5,26,+	0.0979713	0.0535376
hsa-miR-2681-3p	2	2	2	0.1	0.05	13:hsa;hsa-mir-2681,61,82,-	0.0979713	0.0535376
hsa-miR-4761-5p	2	2	2	0.1	0.05	22:hsa;hsa-mir-4761,3,23,+	0.0979713	0.0535376
hsa-miR-3941	2	2	2	0.1	0.05	10:hsa;hsa-mir-3941,60,81,+	0.0979713	0.0535376
hsa-miR-517b-3p	2	2	1	0.1	0.05	19:hsa;hsa-mir-517b,43,64,+	0.0489857	0.0267688
hsa-miR-6889-5p	2	2	2	0.1	0.05	22:hsa;hsa-mir-6889,6,28,-	0.0979713	0.0535376
hsa-miR-320c	2	2	0.61	0.1	0.05	19:hsa;hsa-mir-320e,34,53,-	0.0299357	0.0163587
hsa-miR-320e	2	2	0.61	0.1	0.05	19:hsa;hsa-mir-320e,35,52,-	0.0299357	0.0163587
hsa-miR-302a-3p	1	2	2	0.1	0.05	4:hsa;hsa-mir-302a,44,66,-	0.0979713	0.0535376
hsa-miR-874-5p	2	2	2	0.1	0.05	5:hsa;hsa-mir-874,10,32,-	0.0979713	0.0535376
hsa-miR-6847-3p	2	2	2	0.1	0.05	8:hsa;hsa-mir-6847,45,66,+	0.0979713	0.0535376
hsa-miR-4654	2	2	2	0.1	0.05	1:hsa;hsa-mir-4654,10,31,+	0.0979713	0.0535376
hsa-miR-3191-5p	2	2	2	0.1	0.05	19:hsa;hsa-mir-3191,9,30,-	0.0979713	0.0535376
hsa-miR-586	2	2	2	0.1	0.05	6:hsa;hsa-mir-586,16,37,-	0.0979713	0.0535376
hsa-miR-3943	2	2	2	0.1	0.05	7:hsa;hsa-mir-3943,23,45,+	0.0979713	0.0535376
hsa-miR-211-5p	1	2	1	0.1	0.05	15:hsa;hsa-mir-211,26,47,-	0.0489857	0.0267688
hsa-miR-4651	2	2	2	0.1	0.05	7:hsa;hsa-mir-4651,10,29,+	0.0979713	0.0535376
hsa-miR-6798-3p	1	2	2	0.1	0.05	19:hsa;hsa-mir-6798,47,67,+	0.0979713	0.0535376
hsa-miR-3160-3p	2	2	1	0.1	0.05	11:hsa;hsa-mir-3160-2,52,73,+	0.0489857	0.0267688
hsa-miR-7850-5p	2	2	2	0.1	0.05	19:hsa;hsa-mir-7850,9,29,+	0.0979713	0.0535376
hsa-miR-3939	2	2	2	0.1	0.05	6:hsa;hsa-mir-3939,62,83,-	0.0979713	0.0535376
hsa-miR-1247-3p	2	2	2	0.1	0.05	14:hsa;hsa-mir-1247,74,97,-	0.0979713	0.0535376
hsa-miR-6861-3p	2	2	2	0.1	0.05	12:hsa;hsa-mir-6861,40,57,-	0.0979713	0.0535376
hsa-miR-548j-3p	2	2	2	0.1	0.05	22:hsa;hsa-mir-548j,65,85,-	0.0979713	0.0535376
hsa-miR-659-3p	2	2	2	0.1	0.05	22:hsa;hsa-mir-659,61,82,-	0.0979713	0.0535376
hsa-miR-4715-5p	2	2	2	0.1	0.05	15:hsa;hsa-mir-4715,10,31,-	0.0979713	0.0535376
hsa-miR-1537-3p	1	2	2	0.1	0.05	1:hsa;hsa-mir-1537,40,61,-	0.0979713	0.0535376
hsa-miR-6782-3p	2	2	2	0.1	0.05	17:hsa;hsa-mir-6782,46,68,-	0.0979713	0.0535376
hsa-miR-6851-5p	2	2	2	0.1	0.05	9:hsa;hsa-mir-6851,6,28,-	0.0979713	0.0535376
hsa-miR-6738-3p	2	2	2	0.1	0.05	1:hsa;hsa-mir-6738,41,64,-	0.0979713	0.0535376
hsa-miR-6781-5p	2	2	2	0.1	0.05	17:hsa;hsa-mir-6781,6,26,-	0.0979713	0.0535376
hsa-miR-765	2	2	2	0.1	0.05	1:hsa;hsa-mir-765,69,89,-	0.0979713	0.0535376
hsa-miR-3160-3p	2	2	1	0.1	0.05	11:hsa;hsa-mir-3160-1,54,75,-	0.0489857	0.0267688
hsa-miR-5698	2	2	2	0.1	0.05	1:hsa;hsa-mir-5698,10,31,-	0.0979713	0.0535376
hsa-miR-6857-3p	2	2	2	0.1	0.05	X:hsa;hsa-mir-6857,73,93,-	0.0979713	0.0535376
hsa-miR-4647	2	2	2	0.1	0.05	6:hsa;hsa-mir-4647,11,33,-	0.0979713	0.0535376
hsa-miR-3184-3p	2	2	2	0.1	0.05	17:hsa;hsa-mir-3184,44,66,-	0.0979713	0.0535376
hsa-miR-4286	1	2	2	0.1	0.05	8:hsa;hsa-mir-4286,11,27,+	0.0979713	0.0535376
hsa-miR-3188	2	2	2	0.1	0.05	19:hsa;hsa-mir-3188,53,75,+	0.0979713	0.0535376
hsa-miR-6874-3p	2	2	2	0.1	0.05	7:hsa;hsa-mir-6874,49,71,-	0.0979713	0.0535376
hsa-miR-6820-3p	2	2	2	0.1	0.05	22:hsa;hsa-mir-6820,41,62,+	0.0979713	0.0535376
hsa-miR-4705	1	2	2	0.1	0.05	13:hsa;hsa-mir-4705,10,31,-	0.0979713	0.0535376
hsa-miR-519a-3p	1	2	1	0.1	0.05	19:hsa;hsa-mir-519a-1,53,74,+	0.0489857	0.0267688
hsa-miR-6797-3p	2	2	2	0.1	0.05	19:hsa;hsa-mir-6797,49,70,+	0.0979713	0.0535376
hsa-miR-548av-5p	2	2	2	0.1	0.05	18:hsa;hsa-mir-548av,1,18,-	0.0979713	0.0535376
hsa-miR-190a-3p	2	2	2	0.1	0.05	15:hsa;hsa-mir-190a,52,72,+	0.0979713	0.0535376
hsa-miR-3622a-3p	2	2	2	0.1	0.05	8:hsa;hsa-mir-3622a,50,71,+	0.0979713	0.0535376
hsa-miR-519a-3p	1	2	1	0.1	0.05	19:hsa;hsa-mir-519a-2,54,75,+	0.0489857	0.0267688
hsa-miR-6826-5p	2	2	2	0.1	0.05	3:hsa;hsa-mir-6826,6,28,+	0.0979713	0.0535376
hsa-miR-4723-5p	2	2	2	0.1	0.05	17:hsa;hsa-mir-4723,7,30,+	0.0979713	0.0535376
hsa-miR-3182	2	2	2	0.1	0.05	16:hsa;hsa-mir-3182,4,20,+	0.0979713	0.0535376
hsa-miR-4734	2	2	2	0.1	0.05	17:hsa;hsa-mir-4734,41,62,-	0.0979713	0.0535376
hsa-miR-6868-3p	2	2	2	0.1	0.05	17:hsa;hsa-mir-6868,38,58,-	0.0979713	0.0535376
hsa-miR-4690-5p	1	2	2	0.1	0.05	11:hsa;hsa-mir-4690,1,22,+	0.0979713	0.0535376
hsa-miR-517a-3p	2	2	1	0.1	0.05	19:hsa;hsa-mir-517a,54,75,+	0.0489857	0.0267688
hsa-miR-181d-3p	1	2	2	0.1	0.05	19:hsa;hsa-mir-181d,79,99,+	0.0979713	0.0535376
hsa-miR-3944-5p	2	2	2	0.1	0.05	10:hsa;hsa-mir-3944,23,43,-	0.0979713	0.0535376
hsa-miR-3692-5p	2	2	2	0.1	0.05	6:hsa;hsa-mir-3692,6,29,+	0.0979713	0.0535376
hsa-miR-3675-3p	2	2	1	0.1	0.05	1:hsa;hsa-mir-3675,43,64,-	0.0489857	0.0267688
hsa-miR-4802-5p	2	2	2	0.1	0.05	4:hsa;hsa-mir-4802,13,34,-	0.0979713	0.0535376
hsa-miR-6818-3p	1	2	2	0.1	0.05	22:hsa;hsa-mir-6818,44,65,+	0.0979713	0.0535376
hsa-miR-6819-5p	1	2	2	0.1	0.05	22:hsa;hsa-mir-6819,6,27,-	0.0979713	0.0535376
hsa-miR-6499-5p	1	2	2	0.1	0.05	5:hsa;hsa-mir-6499,5,26,-	0.0979713	0.0535376
hsa-miR-511-5p	1	2	2	0.1	0.05	10:hsa;hsa-mir-511,16,36,+	0.0979713	0.0535376
hsa-miR-3162-5p	1	1	1	0.05	0.03	11:hsa;hsa-mir-3162,10,32,-	0.0489857	0.0267688
hsa-miR-6859-5p	1	1	0.06	0.05	0.03	1:hsa;hsa-mir-6859-3,6,28,-	0.0030616	0.00167305
hsv1-mir-H28	1	1	0.25	0.05	0.03	JQ673480:hsv1;hsv1-mir-H28,13,30,+	0.0122464	0.00669221
hsv1-mir-H28a	1	1	0.25	0.05	0.03	JQ673480:hsv1;hsv1-mir-H28,13,30,+	0.0122464	0.00669221
hsa-miR-873-5p	1	1	1	0.05	0.03	9:hsa;hsa-mir-873,11,31,-	0.0489857	0.0267688
hsa-miR-339-5p	1	1	1	0.05	0.03	7:hsa;hsa-mir-339,15,37,-	0.0489857	0.0267688
hsa-miR-1244	1	1	0.06	0.05	0.03	5:hsa;hsa-mir-1244-4,55,80,+	0.0030616	0.00167305
hsa-miR-6787-3p	1	1	1	0.05	0.03	17:hsa;hsa-mir-6787,40,61,+	0.0489857	0.0267688
hsa-miR-4786-3p	1	1	1	0.05	0.03	2:hsa;hsa-mir-4786,51,72,-	0.0489857	0.0267688
hsa-miR-601	1	1	1	0.05	0.03	9:hsa;hsa-mir-601,16,37,-	0.0489857	0.0267688
hsa-miR-6736-5p	1	1	1	0.05	0.03	1:hsa;hsa-mir-6736,6,26,-	0.0489857	0.0267688
hsa-miR-4670-5p	1	1	1	0.05	0.03	9:hsa;hsa-mir-4670,8,29,-	0.0489857	0.0267688
hsa-miR-509-5p	1	1	0.33	0.05	0.03	X:hsa;hsa-mir-509-2,20,40,-	0.0163286	0.00892294
hsa-miR-4657	1	1	1	0.05	0.03	7:hsa;hsa-mir-4657,1,23,-	0.0489857	0.0267688
hsa-miR-6862-5p	1	1	0.25	0.05	0.03	16:hsa;hsa-mir-6862-1,6,27,-	0.0122464	0.00669221
hsa-miR-6862-3p	1	1	0.25	0.05	0.03	16:hsa;hsa-mir-6862-1,45,68,-	0.0122464	0.00669221
hsa-miR-6783-5p	1	1	1	0.05	0.03	17:hsa;hsa-mir-6783,6,27,-	0.0489857	0.0267688
hsa-miR-1914-3p	1	1	1	0.05	0.03	20:hsa;hsa-mir-1914,50,71,-	0.0489857	0.0267688
hsa-miR-3150a-3p	1	1	1	0.05	0.03	8:hsa;hsa-mir-3150a,49,70,+	0.0489857	0.0267688
hsa-miR-1244	1	1	0.06	0.05	0.03	12:hsa;hsa-mir-1244-4,55,80,-	0.0030616	0.00167305
hsa-miR-6807-5p	1	1	1	0.05	0.03	19:hsa;hsa-mir-6807,1,22,+	0.0489857	0.0267688
hsa-miR-3180-5p	1	1	0.11	0.05	0.03	16:hsa;hsa-mir-3180-3,18,42,+	0.00544285	0.00297431
hsa-miR-6834-5p	1	1	1	0.05	0.03	6:hsa;hsa-mir-6834,1,21,+	0.0489857	0.0267688
hsa-miR-655-5p	1	1	1	0.05	0.03	14:hsa;hsa-mir-655,23,44,+	0.0489857	0.0267688
hsa-miR-6754-5p	1	1	1	0.05	0.03	11:hsa;hsa-mir-6754,6,27,+	0.0489857	0.0267688
hsa-miR-1244	1	1	0.06	0.05	0.03	12:hsa;hsa-mir-1244-1,55,80,-	0.0030616	0.00167305
hsa-miR-3910	1	1	0.5	0.05	0.03	9:hsa;hsa-mir-3910-2,50,69,-	0.0244928	0.0133844
hsa-miR-6764-3p	1	1	1	0.05	0.03	14:hsa;hsa-mir-6764,41,61,+	0.0489857	0.0267688
hsa-miR-6862-5p	1	1	0.25	0.05	0.03	16:hsa;hsa-mir-6862-1,6,27,+	0.0122464	0.00669221
hsa-miR-6862-3p	1	1	0.25	0.05	0.03	16:hsa;hsa-mir-6862-1,45,68,+	0.0122464	0.00669221
hsa-miR-6715b-3p	1	1	1	0.05	0.03	10:hsa;hsa-mir-6715b,46,67,-	0.0489857	0.0267688
hsa-miR-1178-3p	1	1	1	0.05	0.03	12:hsa;hsa-mir-1178,56,76,-	0.0489857	0.0267688
hsa-miR-5191	1	1	1	0.05	0.03	1:hsa;hsa-mir-5191,72,93,+	0.0489857	0.0267688
hsa-miR-632	1	1	1	0.05	0.03	17:hsa;hsa-mir-632,61,79,+	0.0489857	0.0267688
hsa-miR-6511a-3p	1	1	0.06	0.05	0.03	16:hsa;hsa-mir-6511a-1,44,65,-	0.0030616	0.00167305
hsa-miR-3613-3p	1	1	1	0.05	0.03	13:hsa;hsa-mir-3613,53,76,-	0.0489857	0.0267688
hsa-miR-6511a-3p	1	1	0.06	0.05	0.03	16:hsa;hsa-mir-6511a-1,44,65,+	0.0030616	0.00167305
hsa-miR-4429	1	1	1	0.05	0.03	2:hsa;hsa-mir-4429,7,26,-	0.0489857	0.0267688
hsa-miR-6511a-3p	1	1	0.06	0.05	0.03	16:hsa;hsa-mir-6511a-3,44,65,+	0.0030616	0.00167305
hsa-miR-3180-5p	1	1	0.11	0.05	0.03	16:hsa;hsa-mir-3180-1,18,42,-	0.00544285	0.00297431
hsa-miR-4489	1	1	1	0.05	0.03	11:hsa;hsa-mir-4489,6,26,+	0.0489857	0.0267688
hsa-miR-1237-3p	1	1	1	0.05	0.03	11:hsa;hsa-mir-1237,82,102,+	0.0489857	0.0267688
hsa-miR-3200-5p	1	1	1	0.05	0.03	22:hsa;hsa-mir-3200,13,34,+	0.0489857	0.0267688
hsa-miR-7703	1	1	1	0.05	0.03	14:hsa;hsa-mir-7703,55,77,-	0.0489857	0.0267688
hsa-miR-6511b-5p	1	1	0.25	0.05	0.03	16:hsa;hsa-mir-6511b-1,11,34,-	0.0122464	0.00669221
hsa-miR-1244	1	1	0.06	0.05	0.03	12:hsa;hsa-mir-1244-4,55,80,+	0.0030616	0.00167305
hsa-miR-499b-3p	1	1	1	0.05	0.03	20:hsa;hsa-mir-499b,46,67,-	0.0489857	0.0267688
hsa-miR-4700-5p	1	1	1	0.05	0.03	12:hsa;hsa-mir-4700,10,31,+	0.0489857	0.0267688
hsa-miR-1229-5p	1	1	1	0.05	0.03	5:hsa;hsa-mir-1229,1,24,-	0.0489857	0.0267688
hsa-miR-6859-5p	1	1	0.06	0.05	0.03	16:hsa;hsa-mir-6859-4,6,28,-	0.0030616	0.00167305
hsa-miR-135a-5p	1	1	0.5	0.05	0.03	3:hsa;hsa-mir-135a-1,17,39,-	0.0244928	0.0133844
hsa-miR-4695-5p	1	1	1	0.05	0.03	1:hsa;hsa-mir-4695,5,26,-	0.0489857	0.0267688
hsa-miR-6511a-3p	1	1	0.06	0.05	0.03	16:hsa;hsa-mir-6511a-4,44,65,+	0.0030616	0.00167305
hsa-miR-6862-5p	1	1	0.25	0.05	0.03	16:hsa;hsa-mir-6862-2,6,27,+	0.0122464	0.00669221
hsa-miR-6862-3p	1	1	0.25	0.05	0.03	16:hsa;hsa-mir-6862-2,45,68,+	0.0122464	0.00669221
hsa-miR-4720-5p	1	1	1	0.05	0.03	16:hsa;hsa-mir-4720,4,25,+	0.0489857	0.0267688
hsa-miR-6511b-5p	1	1	0.25	0.05	0.03	16:hsa;hsa-mir-6511b-2,6,29,-	0.0122464	0.00669221
hsa-miR-4424	1	1	1	0.05	0.03	1:hsa;hsa-mir-4424,15,36,+	0.0489857	0.0267688
hsa-miR-4699-5p	1	1	1	0.05	0.03	12:hsa;hsa-mir-4699,10,31,+	0.0489857	0.0267688
hsa-miR-548s	1	1	1	0.05	0.03	2:hsa;hsa-mir-548s,52,74,+	0.0489857	0.0267688
hsa-miR-6859-5p	1	1	0.06	0.05	0.03	15:hsa;hsa-mir-6859-4,6,28,+	0.0030616	0.00167305
hsa-miR-4753-5p	1	1	1	0.05	0.03	1:hsa;hsa-mir-4753,10,31,-	0.0489857	0.0267688
hsa-miR-578	1	1	1	0.05	0.03	4:hsa;hsa-mir-578,61,81,+	0.0489857	0.0267688
hsa-miR-653-5p	1	1	1	0.05	0.03	7:hsa;hsa-mir-653,13,33,-	0.0489857	0.0267688
hsa-miR-642b-3p	1	1	0.5	0.05	0.03	19:hsa;hsa-mir-642b,47,68,-	0.0244928	0.0133844
hsa-miR-1244	1	1	0.06	0.05	0.03	12:hsa;hsa-mir-1244-3,55,80,-	0.0030616	0.00167305
hsa-miR-3682-5p	1	1	1	0.05	0.03	2:hsa;hsa-mir-3682,15,36,-	0.0489857	0.0267688
hsa-miR-6862-5p	1	1	0.25	0.05	0.03	16:hsa;hsa-mir-6862-2,6,27,-	0.0122464	0.00669221
hsa-miR-6862-3p	1	1	0.25	0.05	0.03	16:hsa;hsa-mir-6862-2,45,68,-	0.0122464	0.00669221
hsv1-miR-H2-5p	1	1	0.5	0.05	0.03	JQ673480:hsv1;hsv1-mir-H2,8,29,-	0.0244928	0.0133844
hsa-miR-205-5p	1	1	1	0.05	0.03	1:hsa;hsa-mir-205,34,55,+	0.0489857	0.0267688
hsa-miR-6839-5p	1	1	1	0.05	0.03	7:hsa;hsa-mir-6839,6,27,+	0.0489857	0.0267688
hsv1-miR-H11	1	1	0.5	0.05	0.03	JQ673480:hsv1;hsv1-mir-H11,73,92,-	0.0244928	0.0133844
hsa-miR-6796-5p	1	1	1	0.05	0.03	19:hsa;hsa-mir-6796,6,28,+	0.0489857	0.0267688
hsa-miR-1206	1	1	1	0.05	0.03	8:hsa;hsa-mir-1206,4,24,+	0.0489857	0.0267688
hsa-miR-3197	1	1	1	0.05	0.03	21:hsa;hsa-mir-3197,8,30,+	0.0489857	0.0267688
hsa-miR-622	1	1	1	0.05	0.03	13:hsa;hsa-mir-622,61,81,+	0.0489857	0.0267688
hsa-miR-3664-3p	1	1	1	0.05	0.03	11:hsa;hsa-mir-3664,59,80,-	0.0489857	0.0267688
hsa-miR-572	1	1	1	0.05	0.03	4:hsa;hsa-mir-572,61,80,+	0.0489857	0.0267688
hsa-miR-4799-5p	1	1	1	0.05	0.03	4:hsa;hsa-mir-4799,10,31,+	0.0489857	0.0267688
hsa-miR-6812-3p	1	1	1	0.05	0.03	20:hsa;hsa-mir-6812,44,64,+	0.0489857	0.0267688
hsa-miR-3607-5p	1	1	1	0.05	0.03	5:hsa;hsa-mir-3607,12,33,+	0.0489857	0.0267688
hsa-miR-7641	1	1	0.5	0.05	0.03	14:hsa;hsa-mir-7641-2,3,21,+	0.0244928	0.0133844
hsa-miR-4687-5p	1	1	1	0.05	0.03	11:hsa;hsa-mir-4687,12,33,+	0.0489857	0.0267688
hsa-miR-378g	1	1	1	0.05	0.03	1:hsa;hsa-mir-378g,2,21,-	0.0489857	0.0267688
hsa-miR-6859-5p	1	1	0.06	0.05	0.03	1:hsa;hsa-mir-6859-1,6,28,-	0.0030616	0.00167305
hsa-miR-1244	1	1	0.06	0.05	0.03	2:hsa;hsa-mir-1244-2,55,80,+	0.0030616	0.00167305
hsa-miR-6859-5p	1	1	0.06	0.05	0.03	1:hsa;hsa-mir-6859-3,6,28,-	0.0030616	0.00167305
hsa-miR-1244	1	1	0.06	0.05	0.03	2:hsa;hsa-mir-1244-4,55,80,+	0.0030616	0.00167305
hsa-miR-6859-5p	1	1	0.06	0.05	0.03	15:hsa;hsa-mir-6859-1,6,28,+	0.0030616	0.00167305
hsa-miR-6859-5p	1	1	0.06	0.05	0.03	1:hsa;hsa-mir-6859-2,6,28,-	0.0030616	0.00167305
hsa-miR-18b-3p	1	1	0.5	0.05	0.03	X:hsa;hsa-mir-18b,49,70,-	0.0244928	0.0133844
hsa-miR-7113-5p	1	1	1	0.05	0.03	11:hsa;hsa-mir-7113,2,22,+	0.0489857	0.0267688
hsa-miR-4747-5p	1	1	1	0.05	0.03	19:hsa;hsa-mir-4747,1,22,+	0.0489857	0.0267688
hsa-miR-4747-3p	1	1	1	0.05	0.03	19:hsa;hsa-mir-4747,33,54,+	0.0489857	0.0267688
hsa-miR-3922-3p	1	1	1	0.05	0.03	12:hsa;hsa-mir-3922,62,83,+	0.0489857	0.0267688
hsa-miR-6511a-3p	1	1	0.06	0.05	0.03	16:hsa;hsa-mir-6511a-1,44,65,+	0.0030616	0.00167305
hsa-miR-3180-5p	1	1	0.11	0.05	0.03	16:hsa;hsa-mir-3180-2,14,38,-	0.00544285	0.00297431
hsa-miR-4667-5p	1	1	1	0.05	0.03	9:hsa;hsa-mir-4667,3,24,+	0.0489857	0.0267688
hsa-miR-6511a-3p	1	1	0.06	0.05	0.03	16:hsa;hsa-mir-6511a-4,44,65,+	0.0030616	0.00167305
hsa-miR-6511a-3p	1	1	0.06	0.05	0.03	16:hsa;hsa-mir-6511a-2,44,65,-	0.0030616	0.00167305
hsa-miR-6769b-3p	1	1	1	0.05	0.03	1:hsa;hsa-mir-6769b,42,62,+	0.0489857	0.0267688
hsa-miR-516a-5p	1	1	0.5	0.05	0.03	19:hsa;hsa-mir-516a-2,16,38,+	0.0244928	0.0133844
hsa-miR-3675-5p	1	1	0.5	0.05	0.03	KI270714.1:hsa;hsa-mir-3675,12,34,+	0.0244928	0.0133844
hsa-miR-7641	1	1	0.5	0.05	0.03	11:hsa;hsa-mir-7641-1,7,25,+	0.0244928	0.0133844
hsa-miR-345-3p	1	1	1	0.05	0.03	14:hsa;hsa-mir-345,54,75,+	0.0489857	0.0267688
hsa-miR-6511a-3p	1	1	0.06	0.05	0.03	16:hsa;hsa-mir-6511a-4,44,65,+	0.0030616	0.00167305
hsa-miR-4784	1	1	1	0.05	0.03	2:hsa;hsa-mir-4784,10,29,-	0.0489857	0.0267688
hsa-miR-4671-3p	1	1	1	0.05	0.03	1:hsa;hsa-mir-4671,46,66,+	0.0489857	0.0267688
hsa-miR-6799-3p	1	1	1	0.05	0.03	19:hsa;hsa-mir-6799,47,69,+	0.0489857	0.0267688
hsa-miR-3158-5p	1	1	1	0.05	0.03	10:hsa;hsa-mir-3158-1,13,33,+	0.0489857	0.0267688
hsa-miR-3668	1	1	1	0.05	0.03	6:hsa;hsa-mir-3668,9,29,+	0.0489857	0.0267688
hsa-miR-3187-5p	1	1	1	0.05	0.03	19:hsa;hsa-mir-3187,7,29,+	0.0489857	0.0267688
hsa-miR-6859-5p	1	1	0.06	0.05	0.03	15:hsa;hsa-mir-6859-3,6,28,+	0.0030616	0.00167305
hsa-miR-7114-5p	1	1	1	0.05	0.03	9:hsa;hsa-mir-7114,6,26,-	0.0489857	0.0267688
hsv1-miR-H7-3p	1	1	0.5	0.05	0.03	JQ673480:hsv1;hsv1-mir-H7,51,71,+	0.0244928	0.0133844
hsa-miR-3180-5p	1	1	0.11	0.05	0.03	16:hsa;hsa-mir-3180-3,18,42,-	0.00544285	0.00297431
hsa-miR-637	1	1	1	0.05	0.03	19:hsa;hsa-mir-637,61,84,-	0.0489857	0.0267688
hsa-miR-4442	1	1	1	0.05	0.03	3:hsa;hsa-mir-4442,49,65,-	0.0489857	0.0267688
hsa-miR-7107-5p	1	1	1	0.05	0.03	12:hsa;hsa-mir-7107,6,27,-	0.0489857	0.0267688
hsa-miR-3122	1	1	1	0.05	0.03	1:hsa;hsa-mir-3122,10,31,+	0.0489857	0.0267688
hsa-miR-7156-5p	1	1	1	0.05	0.03	1:hsa;hsa-mir-7156,1,23,+	0.0489857	0.0267688
hsa-miR-602	1	1	1	0.05	0.03	9:hsa;hsa-mir-602,16,38,+	0.0489857	0.0267688
hsa-miR-4433b-3p	1	1	1	0.05	0.03	2:hsa;hsa-mir-4433b,60,80,-	0.0489857	0.0267688
hsa-miR-3920	1	1	1	0.05	0.03	11:hsa;hsa-mir-3920,51,72,-	0.0489857	0.0267688
hsa-miR-1244	1	1	0.06	0.05	0.03	5:hsa;hsa-mir-1244-1,55,80,+	0.0030616	0.00167305
hsa-miR-6766-3p	1	1	1	0.05	0.03	15:hsa;hsa-mir-6766,48,69,-	0.0489857	0.0267688
hsa-miR-5583-3p	1	1	0.5	0.05	0.03	18:hsa;hsa-mir-5583-1,38,59,+	0.0244928	0.0133844
hsa-miR-6511b-5p	1	1	0.25	0.05	0.03	16:hsa;hsa-mir-6511b-1,11,34,-	0.0122464	0.00669221
hsa-miR-6505-3p	1	1	1	0.05	0.03	12:hsa;hsa-mir-6505,51,71,+	0.0489857	0.0267688
hsa-miR-135a-5p	1	1	0.5	0.05	0.03	12:hsa;hsa-mir-135a-2,23,45,+	0.0244928	0.0133844
hsa-miR-1244	1	1	0.06	0.05	0.03	12:hsa;hsa-mir-1244-2,55,80,+	0.0030616	0.00167305
hsa-miR-6859-5p	1	1	0.06	0.05	0.03	16:hsa;hsa-mir-6859-2,6,28,-	0.0030616	0.00167305
hsa-miR-6511a-3p	1	1	0.06	0.05	0.03	16:hsa;hsa-mir-6511a-2,44,65,+	0.0030616	0.00167305
hsa-miR-3691-3p	1	1	1	0.05	0.03	6:hsa;hsa-mir-3691,56,77,-	0.0489857	0.0267688
hsa-miR-6886-5p	1	1	1	0.05	0.03	19:hsa;hsa-mir-6886,6,26,+	0.0489857	0.0267688
hsa-miR-95-3p	1	1	1	0.05	0.03	4:hsa;hsa-mir-95,49,70,-	0.0489857	0.0267688
hsa-miR-7109-5p	1	1	1	0.05	0.03	22:hsa;hsa-mir-7109,6,26,-	0.0489857	0.0267688
hsa-miR-6511a-3p	1	1	0.06	0.05	0.03	16:hsa;hsa-mir-6511a-2,44,65,+	0.0030616	0.00167305
hsa-miR-6511a-3p	1	1	0.06	0.05	0.03	16:hsa;hsa-mir-6511a-1,44,65,+	0.0030616	0.00167305
hsa-miR-216a-5p	1	1	1	0.05	0.03	2:hsa;hsa-mir-216a,19,40,-	0.0489857	0.0267688
hsa-miR-6859-5p	1	1	0.06	0.05	0.03	1:hsa;hsa-mir-6859-4,6,28,-	0.0030616	0.00167305
hsa-miR-1252-3p	1	1	1	0.05	0.03	12:hsa;hsa-mir-1252,40,61,+	0.0489857	0.0267688
hsa-miR-1244	1	1	0.06	0.05	0.03	2:hsa;hsa-mir-1244-1,55,80,+	0.0030616	0.00167305
hsa-miR-3917	1	1	1	0.05	0.03	1:hsa;hsa-mir-3917,52,71,-	0.0489857	0.0267688
hsa-miR-6751-5p	1	1	1	0.05	0.03	11:hsa;hsa-mir-6751,6,28,-	0.0489857	0.0267688
hsa-miR-186-3p	1	1	1	0.05	0.03	1:hsa;hsa-mir-186,54,75,-	0.0489857	0.0267688
hsa-miR-3928-5p	1	1	1	0.05	0.03	22:hsa;hsa-mir-3928,3,25,-	0.0489857	0.0267688
hsa-miR-6816-5p	1	1	1	0.05	0.03	22:hsa;hsa-mir-6816,6,26,-	0.0489857	0.0267688
hsa-miR-188-3p	1	1	1	0.05	0.03	X:hsa;hsa-mir-188,54,74,+	0.0489857	0.0267688
hsa-miR-7973	1	1	1	0.05	0.03	15:hsa;hsa-mir-7973-1,1,20,+	0.0489857	0.0267688
hsa-miR-548ar-3p	1	1	1	0.05	0.03	13:hsa;hsa-mir-548ar,37,57,+	0.0489857	0.0267688
hsa-miR-5006-5p	1	1	1	0.05	0.03	13:hsa;hsa-mir-5006,21,41,-	0.0489857	0.0267688
hsa-miR-5006-3p	1	1	1	0.05	0.03	13:hsa;hsa-mir-5006,70,90,-	0.0489857	0.0267688
hsa-miR-3678-3p	1	1	1	0.05	0.03	17:hsa;hsa-mir-3678,69,90,+	0.0489857	0.0267688
hsa-miR-1244	1	1	0.06	0.05	0.03	2:hsa;hsa-mir-1244-3,55,80,+	0.0030616	0.00167305
hsa-miR-3910	1	1	0.5	0.05	0.03	9:hsa;hsa-mir-3910-1,63,82,+	0.0244928	0.0133844
hsa-miR-551b-3p	1	1	1	0.05	0.03	3:hsa;hsa-mir-551b,61,81,+	0.0489857	0.0267688
hsa-miR-4425	1	1	1	0.05	0.03	1:hsa;hsa-mir-4425,50,71,+	0.0489857	0.0267688
hsa-miR-5089-3p	1	1	1	0.05	0.03	17:hsa;hsa-mir-5089,53,75,+	0.0489857	0.0267688
hsa-miR-4533	1	1	1	0.05	0.03	20:hsa;hsa-mir-4533,9,30,+	0.0489857	0.0267688
hsa-miR-675-5p	1	1	0.5	0.05	0.03	11:hsa;hsa-mir-675,10,32,-	0.0244928	0.0133844
hsa-miR-675-3p	1	1	0.5	0.05	0.03	11:hsa;hsa-mir-675,45,64,-	0.0244928	0.0133844
hsa-miR-6511b-5p	1	1	0.25	0.05	0.03	16:hsa;hsa-mir-6511b-2,6,29,-	0.0122464	0.00669221
hsa-miR-6733-3p	1	1	1	0.05	0.03	1:hsa;hsa-mir-6733,42,61,-	0.0489857	0.0267688
hsa-miR-6854-3p	1	1	1	0.05	0.03	9:hsa;hsa-mir-6854,49,69,-	0.0489857	0.0267688
hsa-miR-5580-3p	1	1	1	0.05	0.03	14:hsa;hsa-mir-5580,37,58,-	0.0489857	0.0267688
hsa-miR-1244	1	1	0.06	0.05	0.03	12:hsa;hsa-mir-1244-3,55,80,+	0.0030616	0.00167305
hsa-miR-6859-5p	1	1	0.06	0.05	0.03	1:hsa;hsa-mir-6859-4,6,28,-	0.0030616	0.00167305
hsa-miR-3134	1	1	1	0.05	0.03	3:hsa;hsa-mir-3134,45,67,-	0.0489857	0.0267688
hsa-miR-6859-5p	1	1	0.06	0.05	0.03	15:hsa;hsa-mir-6859-2,6,28,+	0.0030616	0.00167305
hsa-miR-6871-5p	1	1	1	0.05	0.03	20:hsa;hsa-mir-6871,6,27,+	0.0489857	0.0267688
hsa-miR-6511a-3p	1	1	0.06	0.05	0.03	16:hsa;hsa-mir-6511a-3,44,65,+	0.0030616	0.00167305
hsa-miR-5194	1	1	1	0.05	0.03	8:hsa;hsa-mir-5194,73,94,-	0.0489857	0.0267688
hsa-miR-4755-3p	1	1	1	0.05	0.03	20:hsa;hsa-mir-4755,44,65,+	0.0489857	0.0267688
hsa-miR-6729-5p	1	1	1	0.05	0.03	1:hsa;hsa-mir-6729,6,27,+	0.0489857	0.0267688
hsa-miR-3124-3p	1	1	1	0.05	0.03	1:hsa;hsa-mir-3124,42,63,+	0.0489857	0.0267688
hsa-miR-1244	1	1	0.06	0.05	0.03	5:hsa;hsa-mir-1244-3,55,80,+	0.0030616	0.00167305
hsa-miR-1180-5p	1	1	1	0.05	0.03	17:hsa;hsa-mir-1180,7,27,-	0.0489857	0.0267688
hsa-miR-6506-5p	1	1	1	0.05	0.03	16:hsa;hsa-mir-6506,2,24,-	0.0489857	0.0267688
hsa-miR-4804-3p	1	1	1	0.05	0.03	5:hsa;hsa-mir-4804,45,65,+	0.0489857	0.0267688
hsa-miR-6798-5p	1	1	1	0.05	0.03	19:hsa;hsa-mir-6798,6,28,+	0.0489857	0.0267688
hsa-miR-302d-3p	1	1	1	0.05	0.03	4:hsa;hsa-mir-302d,44,66,-	0.0489857	0.0267688
hsa-miR-206	1	1	1	0.05	0.03	6:hsa;hsa-mir-206,53,74,+	0.0489857	0.0267688
hsa-miR-6511a-3p	1	1	0.06	0.05	0.03	16:hsa;hsa-mir-6511a-3,44,65,+	0.0030616	0.00167305
hsa-miR-3659	1	1	1	0.05	0.03	1:hsa;hsa-mir-3659,59,79,+	0.0489857	0.0267688
hsa-miR-1244	1	1	0.06	0.05	0.03	12:hsa;hsa-mir-1244-2,55,80,-	0.0030616	0.00167305
hsa-miR-3195	1	1	1	0.05	0.03	20:hsa;hsa-mir-3195,11,27,+	0.0489857	0.0267688
hsa-miR-6878-5p	1	1	1	0.05	0.03	1:hsa;hsa-mir-6878,6,28,+	0.0489857	0.0267688
hsa-miR-3652	1	1	1	0.05	0.03	12:hsa;hsa-mir-3652,1,18,+	0.0489857	0.0267688
hsa-miR-4770	1	1	1	0.05	0.03	X:hsa;hsa-mir-4770,40,57,-	0.0489857	0.0267688
hsa-miR-219b-3p	1	1	1	0.05	0.03	9:hsa;hsa-mir-219b,56,78,+	0.0489857	0.0267688
hsa-miR-6511a-3p	1	1	0.06	0.05	0.03	16:hsa;hsa-mir-6511a-3,44,65,-	0.0030616	0.00167305
hsa-miR-3144-3p	1	1	1	0.05	0.03	6:hsa;hsa-mir-3144,48,69,+	0.0489857	0.0267688
hsa-miR-5587-5p	1	1	1	0.05	0.03	16:hsa;hsa-mir-5587,1,18,+	0.0489857	0.0267688
hsa-miR-448	1	1	1	0.05	0.03	X:hsa;hsa-mir-448,71,92,+	0.0489857	0.0267688
hsa-miR-1231	1	1	1	0.05	0.03	1:hsa;hsa-mir-1231,5,24,+	0.0489857	0.0267688
hsa-miR-6511a-3p	1	1	0.06	0.05	0.03	16:hsa;hsa-mir-6511a-4,44,65,-	0.0030616	0.00167305
hsa-miR-6884-3p	1	1	1	0.05	0.03	17:hsa;hsa-mir-6884,54,76,-	0.0489857	0.0267688
hsa-miR-6823-5p	1	1	1	0.05	0.03	3:hsa;hsa-mir-6823,6,26,-	0.0489857	0.0267688
hsa-miR-585-5p	1	1	1	0.05	0.03	5:hsa;hsa-mir-585,25,46,-	0.0489857	0.0267688
hsa-miR-4731-3p	1	1	1	0.05	0.03	17:hsa;hsa-mir-4731,42,63,-	0.0489857	0.0267688
hsv1-miR-H7-3p	1	1	0.5	0.05	0.03	JQ673480:hsv1;hsv1-mir-H7,51,71,-	0.0244928	0.0133844
hsa-miR-676-5p	1	1	1	0.05	0.03	X:hsa;hsa-mir-676,8,28,+	0.0489857	0.0267688
hsa-miR-3180-5p	1	1	0.11	0.05	0.03	16:hsa;hsa-mir-3180-2,14,38,+	0.00544285	0.00297431
hsa-miR-19b-2-5p	1	1	1	0.05	0.03	X:hsa;hsa-mir-19b-2,19,40,-	0.0489857	0.0267688
hsa-miR-5090	1	1	1	0.05	0.03	7:hsa;hsa-mir-5090,11,33,+	0.0489857	0.0267688
hsa-miR-4715-3p	1	1	1	0.05	0.03	15:hsa;hsa-mir-4715,46,68,-	0.0489857	0.0267688
hsv1-miR-H2-5p	1	1	0.5	0.05	0.03	JQ673480:hsv1;hsv1-mir-H2,8,29,+	0.0244928	0.0133844
hsa-miR-5693	1	1	1	0.05	0.03	13:hsa;hsa-mir-5693,43,64,-	0.0489857	0.0267688
hsa-miR-133b	1	1	1	0.05	0.03	6:hsa;hsa-mir-133b,66,87,+	0.0489857	0.0267688
hsa-miR-6789-5p	1	1	1	0.05	0.03	19:hsa;hsa-mir-6789,5,28,-	0.0489857	0.0267688
hsa-miR-6789-3p	1	1	1	0.05	0.03	19:hsa;hsa-mir-6789,78,98,-	0.0489857	0.0267688
hsa-miR-6775-3p	1	1	1	0.05	0.03	16:hsa;hsa-mir-6775,49,69,-	0.0489857	0.0267688
hsa-miR-516a-5p	1	1	0.5	0.05	0.03	19:hsa;hsa-mir-516a-1,16,38,+	0.0244928	0.0133844
hsa-miR-6859-5p	1	1	0.06	0.05	0.03	16:hsa;hsa-mir-6859-1,6,28,-	0.0030616	0.00167305
hsa-miR-3180-5p	1	1	0.11	0.05	0.03	16:hsa;hsa-mir-3180-3,18,42,+	0.00544285	0.00297431
hsa-miR-1266-5p	1	1	1	0.05	0.03	15:hsa;hsa-mir-1266,13,35,-	0.0489857	0.0267688
hsa-miR-374c-3p	1	1	0.5	0.05	0.03	X:hsa;hsa-mir-374c,39,60,+	0.0244928	0.0133844
hsa-miR-5008-5p	1	1	1	0.05	0.03	1:hsa;hsa-mir-5008,22,43,-	0.0489857	0.0267688
hsa-miR-5008-3p	1	1	1	0.05	0.03	1:hsa;hsa-mir-5008,54,74,-	0.0489857	0.0267688
hsa-miR-4764-5p	1	1	1	0.05	0.03	22:hsa;hsa-mir-4764,10,30,-	0.0489857	0.0267688
hsa-miR-658	1	1	1	0.05	0.03	22:hsa;hsa-mir-658,61,85,-	0.0489857	0.0267688
hsa-miR-509-5p	1	1	0.33	0.05	0.03	X:hsa;hsa-mir-509-1,20,40,-	0.0163286	0.00892294
hsa-miR-3132	1	1	1	0.05	0.03	2:hsa;hsa-mir-3132,8,31,-	0.0489857	0.0267688
hsa-miR-5691	1	1	1	0.05	0.03	11:hsa;hsa-mir-5691,9,30,-	0.0489857	0.0267688
hsa-miR-1244	1	1	0.06	0.05	0.03	12:hsa;hsa-mir-1244-1,55,80,+	0.0030616	0.00167305
hsv1-miR-H11	1	1	0.5	0.05	0.03	JQ673480:hsv1;hsv1-mir-H11,73,92,+	0.0244928	0.0133844
hsa-miR-3679-3p	1	1	1	0.05	0.03	2:hsa;hsa-mir-3679,44,65,+	0.0489857	0.0267688
hsa-miR-1246	1	1	1	0.05	0.03	2:hsa;hsa-mir-1246,11,29,-	0.0489857	0.0267688
hsa-miR-1292-3p	1	1	1	0.05	0.03	20:hsa;hsa-mir-1292,43,62,+	0.0489857	0.0267688
hsa-miR-6761-5p	1	1	1	0.05	0.03	12:hsa;hsa-mir-6761,6,26,+	0.0489857	0.0267688
hsa-miR-4730	1	1	1	0.05	0.03	17:hsa;hsa-mir-4730,10,32,+	0.0489857	0.0267688
hsa-miR-4530	1	1	1	0.05	0.03	19:hsa;hsa-mir-4530,33,50,-	0.0489857	0.0267688
hsa-miR-3180-5p	1	1	0.11	0.05	0.03	16:hsa;hsa-mir-3180-1,18,42,+	0.00544285	0.00297431
hsa-miR-509-5p	1	1	0.33	0.05	0.03	X:hsa;hsa-mir-509-2,20,40,-	0.0163286	0.00892294
hsa-miR-3180-5p	1	1	0.11	0.05	0.03	16:hsa;hsa-mir-3180-2,14,38,+	0.00544285	0.00297431
hsa-miR-583	1	1	1	0.05	0.03	5:hsa;hsa-mir-583,16,36,+	0.0489857	0.0267688
hsa-miR-6857-5p	1	1	1	0.05	0.03	X:hsa;hsa-mir-6857,6,27,-	0.0489857	0.0267688
hsa-miR-4714-3p	1	1	1	0.05	0.03	15:hsa;hsa-mir-4714,48,69,+	0.0489857	0.0267688
hsa-miR-639	1	1	1	0.05	0.03	19:hsa;hsa-mir-639,61,83,+	0.0489857	0.0267688
hsa-miR-3149	1	1	1	0.05	0.03	8:hsa;hsa-mir-3149,51,73,-	0.0489857	0.0267688
hsa-miR-6859-5p	1	1	0.06	0.05	0.03	1:hsa;hsa-mir-6859-1,6,28,-	0.0030616	0.00167305
hsa-miR-149-3p	1	1	1	0.05	0.03	2:hsa;hsa-mir-149,56,76,+	0.0489857	0.0267688
hsa-miR-1909-5p	1	1	1	0.05	0.03	19:hsa;hsa-mir-1909,16,36,-	0.0489857	0.0267688
hsa-miR-6859-5p	1	1	0.06	0.05	0.03	1:hsa;hsa-mir-6859-2,6,28,-	0.0030616	0.00167305
hsa-miR-5583-3p	1	1	0.5	0.05	0.03	18:hsa;hsa-mir-5583-2,38,59,-	0.0244928	0.0133844
hsv1-miR-H8a-3p	1	1	0.25	0.05	0.03	JQ673480:hsv1;hsv1-mir-H8a,48,67,-	0.0122464	0.00669221
hsv1-miR-H8-3p	1	1	0.25	0.05	0.03	JQ673480:hsv1;hsv1-mir-H8a,48,67,-	0.0122464	0.00669221
hsa-miR-4666a-5p	1	1	1	0.05	0.03	1:hsa;hsa-mir-4666a,10,30,+	0.0489857	0.0267688
hsa-miR-3163	1	1	1	0.05	0.03	11:hsa;hsa-mir-3163,10,31,-	0.0489857	0.0267688
hsa-miR-6739-3p	1	1	1	0.05	0.03	1:hsa;hsa-mir-6739,55,75,+	0.0489857	0.0267688
hsa-miR-6504-5p	1	1	1	0.05	0.03	16:hsa;hsa-mir-6504,5,25,+	0.0489857	0.0267688
hsa-miR-937-5p	1	1	1	0.05	0.03	8:hsa;hsa-mir-937,14,33,-	0.0489857	0.0267688
hsa-miR-6511a-3p	1	1	0.06	0.05	0.03	16:hsa;hsa-mir-6511a-2,44,65,+	0.0030616	0.00167305
hsv1-mir-H28	1	1	0.25	0.05	0.03	JQ673480:hsv1;hsv1-mir-H28a,13,30,+	0.0122464	0.00669221
hsv1-mir-H28a	1	1	0.25	0.05	0.03	JQ673480:hsv1;hsv1-mir-H28a,13,30,+	0.0122464	0.00669221
hsv1-miR-H27	1	1	0.5	0.05	0.03	JQ673480:hsv1;hsv1-mir-H27,59,81,-	0.0244928	0.0133844
hsa-miR-6737-5p	1	1	1	0.05	0.03	1:hsa;hsa-mir-6737,6,26,-	0.0489857	0.0267688
hsa-miR-6874-5p	1	1	1	0.05	0.03	7:hsa;hsa-mir-6874,6,28,-	0.0489857	0.0267688
hsa-miR-4766-5p	1	1	1	0.05	0.03	22:hsa;hsa-mir-4766,12,32,-	0.0489857	0.0267688
hsa-miR-4766-3p	1	1	1	0.05	0.03	22:hsa;hsa-mir-4766,46,66,-	0.0489857	0.0267688
hsa-miR-3934-5p	1	1	1	0.05	0.03	6:hsa;hsa-mir-3934,25,46,+	0.0489857	0.0267688
hsa-miR-6820-5p	1	1	1	0.05	0.03	22:hsa;hsa-mir-6820,6,24,+	0.0489857	0.0267688
hsa-miR-656-5p	1	1	1	0.05	0.03	14:hsa;hsa-mir-656,8,28,+	0.0489857	0.0267688
hsa-miR-1827	1	1	0.33	0.05	0.03	12:hsa;hsa-mir-1827,49,66,+	0.0163286	0.00892294
hsa-miR-4779	1	1	1	0.05	0.03	2:hsa;hsa-mir-4779,51,72,-	0.0489857	0.0267688
hsa-miR-202-5p	1	1	1	0.05	0.03	10:hsa;hsa-mir-202,28,49,-	0.0489857	0.0267688
hsa-miR-4674	1	1	1	0.05	0.03	9:hsa;hsa-mir-4674,58,78,-	0.0489857	0.0267688
hsa-miR-3151-5p	1	1	1	0.05	0.03	8:hsa;hsa-mir-3151,10,30,+	0.0489857	0.0267688
hsa-miR-323b-5p	1	1	1	0.05	0.03	14:hsa;hsa-mir-323b,15,37,+	0.0489857	0.0267688
hsa-miR-1244	1	1	0.06	0.05	0.03	5:hsa;hsa-mir-1244-2,55,80,+	0.0030616	0.00167305
hsv1-miR-H27	1	1	0.5	0.05	0.03	JQ673480:hsv1;hsv1-mir-H27,59,81,+	0.0244928	0.0133844
hsa-miR-6859-5p	1	1	0.06	0.05	0.03	16:hsa;hsa-mir-6859-3,6,28,-	0.0030616	0.00167305
hsa-miR-6793-5p	1	1	1	0.05	0.03	19:hsa;hsa-mir-6793,6,27,+	0.0489857	0.0267688
hsa-miR-6793-3p	1	1	1	0.05	0.03	19:hsa;hsa-mir-6793,44,63,+	0.0489857	0.0267688
hsa-miR-6875-5p	1	1	1	0.05	0.03	7:hsa;hsa-mir-6875,6,26,+	0.0489857	0.0267688
hsa-miR-130a-5p	1	1	1	0.05	0.03	11:hsa;hsa-mir-130a,21,42,+	0.0489857	0.0267688
hsa-miR-4522	1	1	1	0.05	0.03	17:hsa;hsa-mir-4522,55,75,-	0.0489857	0.0267688
hsa-miR-6849-3p	1	1	1	0.05	0.03	8:hsa;hsa-mir-6849,48,69,-	0.0489857	0.0267688
hsa-miR-4782-5p	1	1	1	0.05	0.03	2:hsa;hsa-mir-4782,10,31,-	0.0489857	0.0267688
hsa-miR-4782-3p	1	1	1	0.05	0.03	2:hsa;hsa-mir-4782,50,71,-	0.0489857	0.0267688
hsv1-miR-H8a-3p	1	1	0.25	0.05	0.03	JQ673480:hsv1;hsv1-mir-H8a,48,67,+	0.0122464	0.00669221
hsv1-miR-H8-3p	1	1	0.25	0.05	0.03	JQ673480:hsv1;hsv1-mir-H8a,48,67,+	0.0122464	0.00669221
hsa-miR-4704-5p	1	1	1	0.05	0.03	13:hsa;hsa-mir-4704,10,31,+	0.0489857	0.0267688
hsa-miR-675-5p	1	1	0.5	0.05	0.03	KI270721.1:hsa;hsa-mir-675,10,32,-	0.0244928	0.0133844
hsa-miR-675-3p	1	1	0.5	0.05	0.03	KI270721.1:hsa;hsa-mir-675,45,64,-	0.0244928	0.0133844
hsa-miR-3675-5p	1	1	0.5	0.05	0.03	1:hsa;hsa-mir-3675,12,34,-	0.0244928	0.0133844
hsa-miR-20b-3p	1	1	1	0.05	0.03	X:hsa;hsa-mir-20b,44,65,-	0.0489857	0.0267688
hsa-miR-3180-5p	1	1	0.11	0.05	0.03	16:hsa;hsa-mir-3180-1,18,42,+	0.00544285	0.00297431
hsa-miR-203b-3p	1	1	1	0.05	0.03	14:hsa;hsa-mir-203b,54,76,-	0.0489857	0.0267688
hsa-miR-6837-5p	1	1	1	0.05	0.03	7:hsa;hsa-mir-6837,6,26,+	0.0489857	0.0267688
hsa-miR-6803-3p	1	1	1	0.05	0.03	19:hsa;hsa-mir-6803,44,65,-	0.0489857	0.0267688

## Sheet: mock-hsa
Table S2: Human (hsa-) and herpes simplex virus 1 (hsv1-) mature miRNAs detected in mock samples, and at 8 h.p.i., and 18 h.p.i.
HFF mock - human miRNAs
name	unique reads	read count	read count (mult. map. adj.)	RPM (lib)	RPM (total)	coordinateString	RPM_adj (lib)	RPM_adj (total)
hsa-miR-21-5p	4161	7449016	7449016	364895	199401	17:hsa;hsa-mir-21,8,29,+	364895	199401
hsa-miR-100-5p	2137	1666323	1663381	81625.9	44605.5	11:hsa;hsa-mir-100,13,34,-	81481.8	44526.8
hsa-miR-143-3p	2349	1184192	1184192	58008.4	31699.4	5:hsa;hsa-mir-143,61,81,+	58008.4	31699.4
hsa-let-7i-5p	1692	932074	930680	45658.3	24950.5	12:hsa;hsa-let-7i,6,27,+	45590	24913.2
hsa-miR-199a-3p	2999	774532	259146	37941	20733.3	1:hsa;hsa-mir-199a-2,70,91,-	12694.5	6937.05
hsa-miR-199b-3p	2924	773323	257835	37881.7	20701	9:hsa;hsa-mir-199b,65,86,-	12630.2	6901.94
hsa-miR-199a-3p	2865	773254	257786	37878.4	20699.1	19:hsa;hsa-mir-199a-1,47,68,-	12627.8	6900.61
hsa-let-7f-5p	1071	643891	326726	31541.4	17236.2	X:hsa;hsa-let-7f-2,8,29,-	16004.9	8746.08
hsa-let-7f-5p	1011	633685	316552	31041.5	16963	9:hsa;hsa-let-7f-1,7,28,+	15506.5	8473.73
hsa-miR-26a-5p	1235	471336	235896	23088.7	12617.1	12:hsa;hsa-mir-26a-2,14,35,-	11555.5	6314.65
hsa-miR-26a-5p	1208	471002	235562	23072.3	12608.2	3:hsa;hsa-mir-26a-1,10,31,+	11539.2	6305.71
hsa-let-7a-5p	1034	446784	148923	21886	11959.9	22:hsa;hsa-let-7a-3,4,25,+	7295.08	3986.49
hsa-let-7a-5p	1020	446517	148650	21872.9	11952.7	9:hsa;hsa-let-7a-1,6,27,+	7281.7	3979.18
hsa-let-7a-5p	1014	446321	148448	21863.3	11947.5	11:hsa;hsa-let-7a-2,5,26,-	7271.81	3973.77
hsa-let-7g-5p	1093	407295	403092	19951.6	10902.8	3:hsa;hsa-let-7g,5,26,-	19745.7	10790.3
hsa-miR-199a-5p	1225	366710	183135	17963.5	9816.4	19:hsa;hsa-mir-199a-1,6,28,-	8970.99	4902.31
hsa-miR-199a-5p	1215	366702	183127	17963.1	9816.18	1:hsa;hsa-mir-199a-2,31,53,-	8970.6	4902.09
hsa-miR-30a-5p	1624	355932	355768	17435.6	9527.88	6:hsa;hsa-mir-30a,6,27,-	17427.6	9523.5
hsa-miR-222-3p	2446	355797	355797	17429	9524.27	X:hsa;hsa-mir-222,69,89,-	17429	9524.27
hsa-miR-22-3p	863	354269	354269	17354.1	9483.36	17:hsa;hsa-mir-22,53,74,-	17354.1	9483.36
hsa-miR-27b-3p	1380	340674	337176	16688.1	9119.44	9:hsa;hsa-mir-27b,61,81,+	16516.8	9025.82
hsa-miR-221-3p	2181	326757	326757	16006.4	8746.9	X:hsa;hsa-mir-221,65,87,-	16006.4	8746.9
hsa-miR-148a-3p	680	244051	243638	11955	6532.96	7:hsa;hsa-mir-148a,44,65,-	11934.8	6521.9
hsa-miR-29a-3p	1423	235426	235336	11532.5	6302.08	7:hsa;hsa-mir-29a,42,63,-	11528.1	6299.65
hsa-miR-27a-3p	1896	222050	218552	10877.3	5944.02	19:hsa;hsa-mir-27a,51,71,-	10705.9	5850.39
hsa-miR-30d-5p	1296	209519	209176	10263.4	5608.58	8:hsa;hsa-mir-30d,6,27,-	10246.6	5599.41
hsa-miR-24-3p	947	203019	102151	9945.02	5434.58	9:hsa;hsa-mir-24-1,44,65,+	5003.93	2734.46
hsa-miR-24-3p	884	201825	100957	9886.53	5402.62	19:hsa;hsa-mir-24-2,50,71,-	4945.45	2702.5
hsa-miR-125b-5p	1215	196664	102198	9633.72	5264.46	11:hsa;hsa-mir-125b-1,15,36,-	5006.21	2735.71
hsa-miR-125b-5p	1145	191018	96551.5	9357.14	5113.33	21:hsa;hsa-mir-125b-2,17,38,+	4729.64	2584.57
hsa-let-7b-5p	1388	186840	185627	9152.48	5001.49	22:hsa;hsa-let-7b,6,27,+	9093.08	4969.03
hsa-miR-199b-5p	885	139322	138366	6824.78	3729.49	9:hsa;hsa-mir-199b,26,48,-	6777.95	3703.9
hsa-miR-99b-5p	920	136234	136234	6673.51	3646.82	19:hsa;hsa-mir-99b,7,28,+	6673.51	3646.82
hsa-miR-423-3p	1991	130550	130550	6395.08	3494.67	17:hsa;hsa-mir-423,53,75,+	6395.08	3494.67
hsa-miR-127-3p	1480	130379	130379	6386.7	3490.09	14:hsa;hsa-mir-127,57,78,+	6386.7	3490.09
hsa-miR-7-5p	744	110234	37720.3	5399.89	2950.83	9:hsa;hsa-mir-7-1,24,46,-	1847.76	1009.73
hsa-miR-7-5p	734	109200	36686.8	5349.23	2923.16	15:hsa;hsa-mir-7-2,32,54,+	1797.13	982.063
hsa-miR-7-5p	702	109100	36586.8	5344.34	2920.48	19:hsa;hsa-mir-7-3,31,53,+	1792.23	979.386
hsa-miR-103a-3p	1063	104898	51937.3	5138.5	2808	20:hsa;hsa-mir-103a-2,48,70,+	2544.18	1390.3
hsa-miR-103a-3p	1030	104447	51487.3	5116.41	2795.92	5:hsa;hsa-mir-103a-1,48,70,-	2522.14	1378.26
hsa-miR-92a-3p	1135	93380	48870.7	4574.28	2499.67	13:hsa;hsa-mir-92a-1,48,69,+	2393.96	1308.21
hsa-miR-92a-3p	1070	90034	45524.7	4410.38	2410.1	X:hsa;hsa-mir-92a-2,48,69,-	2230.06	1218.64
hsa-miR-381-3p	528	83408	83408	4085.8	2232.73	14:hsa;hsa-mir-381,49,70,+	4085.8	2232.73
hsa-miR-152-3p	982	79987	79984.5	3918.22	2141.16	17:hsa;hsa-mir-152,54,74,-	3918.09	2141.09
hsa-miR-370-3p	725	66251	66251	3245.35	1773.46	14:hsa;hsa-mir-370,48,69,+	3245.35	1773.46
hsa-miR-125a-5p	786	64949	64949	3181.57	1738.61	19:hsa;hsa-mir-125a,15,38,+	3181.57	1738.61
hsa-miR-30e-5p	722	55249	55009	2706.41	1478.95	1:hsa;hsa-mir-30e,17,38,+	2694.65	1472.53
hsa-miR-191-5p	815	54054	54054	2647.87	1446.96	3:hsa;hsa-mir-191,16,38,-	2647.87	1446.96
hsa-miR-99a-5p	663	51909	48978	2542.8	1389.54	21:hsa;hsa-mir-99a,13,34,+	2399.22	1311.08
hsa-miR-218-5p	779	50761	26107	2486.56	1358.81	4:hsa;hsa-mir-218-1,25,45,+	1278.87	698.854
hsa-miR-218-5p	712	49359	24705	2417.88	1321.28	5:hsa;hsa-mir-218-2,25,45,-	1210.19	661.324
hsa-miR-101-3p	893	48699	24758.5	2385.55	1303.61	9:hsa;hsa-mir-101-2,49,69,+	1212.81	662.756
hsa-miR-101-3p	861	48040	24099.5	2353.27	1285.97	1:hsa;hsa-mir-101-1,47,67,-	1180.53	645.115
hsa-miR-148b-3p	642	46872	46458.5	2296.06	1254.71	12:hsa;hsa-mir-148b,63,84,+	2275.8	1243.64
hsa-miR-23a-3p	758	42851	42392.3	2099.08	1147.07	19:hsa;hsa-mir-23a,45,65,-	2076.62	1134.79
hsa-miR-221-5p	780	41635	41635	2039.52	1114.52	X:hsa;hsa-mir-221,25,46,-	2039.52	1114.52
hsa-miR-181a-5p	883	40271	20137.8	1972.7	1078.01	1:hsa;hsa-mir-181a-1,24,46,-	986.461	539.064
hsa-miR-181a-5p	876	40262	20128.8	1972.26	1077.77	9:hsa;hsa-mir-181a-2,39,61,+	986.02	538.823
hsa-miR-25-3p	636	38918	38916	1906.42	1041.79	7:hsa;hsa-mir-25,52,73,-	1906.33	1041.74
hsa-miR-4485-3p	819	38474	38474	1884.67	1029.9	11:hsa;hsa-mir-4485,31,50,-	1884.67	1029.9
hsa-let-7e-5p	539	37695	36929.6	1846.51	1009.05	19:hsa;hsa-let-7e,8,29,+	1809.02	988.561
hsa-miR-30c-5p	566	37580	18800.2	1840.88	1005.97	6:hsa;hsa-mir-30c-2,7,29,-	920.939	503.258
hsa-miR-30c-5p	556	37550	18770.2	1839.41	1005.17	1:hsa;hsa-mir-30c-1,17,39,+	919.469	502.455
hsa-miR-128-3p	593	35412	22081.5	1734.68	947.94	2:hsa;hsa-mir-128-1,50,70,+	1081.68	591.096
hsa-miR-379-5p	405	34060	34060	1668.45	911.75	14:hsa;hsa-mir-379,6,26,+	1668.45	911.746
hsa-miR-409-3p	974	33192	33192	1625.93	888.51	14:hsa;hsa-mir-409,47,68,+	1625.93	888.511
hsa-miR-26b-5p	439	30926	30921.3	1514.93	827.85	2:hsa;hsa-mir-26b,12,32,+	1514.7	827.728
hsa-miR-532-5p	443	28166	28166	1379.73	753.97	X:hsa;hsa-mir-532,20,41,+	1379.73	753.971
hsa-miR-455-5p	720	27977	27977	1370.47	748.91	9:hsa;hsa-mir-455,16,37,+	1370.47	748.911
hsa-miR-128-3p	463	27950	14619.5	1369.15	748.19	3:hsa;hsa-mir-128-2,52,72,+	716.146	391.347
hsa-miR-224-5p	488	25882	25882	1267.85	692.83	X:hsa;hsa-mir-224,8,28,-	1267.85	692.831
hsa-miR-411-5p	379	23080	23080	1130.59	617.82	14:hsa;hsa-mir-411,16,36,+	1130.59	617.824
hsa-miR-31-5p	583	22813	22813	1117.51	610.68	9:hsa;hsa-mir-31,8,28,-	1117.51	610.677
hsa-miR-151a-3p	1252	22285	22285	1091.65	596.54	8:hsa;hsa-mir-151a,47,67,-	1091.65	596.543
hsa-miR-140-3p	759	21990	21990	1077.19	588.65	16:hsa;hsa-mir-140,62,82,+	1077.19	588.646
hsa-miR-23b-3p	590	21460	21002.8	1051.23	574.46	9:hsa;hsa-mir-23b,58,78,+	1028.84	562.221
hsa-miR-1307-3p	743	21443	21443	1050.4	574	10:hsa;hsa-mir-1307,80,101,-	1050.4	574.004
hsa-miR-493-5p	267	20630	20630	1010.57	552.24	14:hsa;hsa-mir-493,16,37,+	1010.57	552.241
hsa-miR-654-3p	508	20603	20603	1009.25	551.52	14:hsa;hsa-mir-654,51,72,+	1009.25	551.518
hsa-miR-146b-5p	428	19798	19795.5	969.82	529.97	10:hsa;hsa-mir-146b,9,30,+	969.696	529.902
hsa-miR-155-5p	632	17548	17548	859.6	469.74	21:hsa;hsa-mir-155,4,26,+	859.6	469.739
hsa-miR-20a-5p	288	17390	17329.7	851.86	465.51	13:hsa;hsa-mir-20a,8,30,+	848.905	463.895
hsa-miR-34c-5p	371	17104	17100	837.85	457.85	11:hsa;hsa-mir-34c,13,35,+	837.655	457.747
hsa-miR-93-5p	442	17083	17083	836.82	457.29	7:hsa;hsa-mir-93,11,33,-	836.822	457.292
hsa-miR-423-5p	395	16685	16685	817.33	446.64	17:hsa;hsa-mir-423,17,39,+	817.326	446.638
hsa-let-7d-5p	324	16282	15282.1	797.58	435.85	9:hsa;hsa-let-7d,8,29,+	748.606	409.085
hsa-miR-214-3p	693	14655	14655	717.88	392.3	1:hsa;hsa-mir-214,71,92,-	717.885	392.297
hsa-miR-145-5p	348	14277	14277	699.37	382.18	5:hsa;hsa-mir-145,16,38,+	699.368	382.178
hsa-miR-125b-1-3p	573	13581	13581	665.27	363.55	11:hsa;hsa-mir-125b-1,55,76,-	665.274	363.547
hsa-miR-92b-3p	738	12781	12779.7	626.09	342.13	1:hsa;hsa-mir-92b,61,82,+	626.02	342.097
hsa-miR-30a-3p	443	12549	12540	614.72	335.92	6:hsa;hsa-mir-30a,47,68,-	614.28	335.681
hsa-miR-146a-5p	488	12385	12382.5	606.69	331.53	5:hsa;hsa-mir-146a,21,42,+	606.565	331.465
hsa-miR-16-5p	328	12169	6131.33	596.11	325.75	13:hsa;hsa-mir-16-1,14,35,-	300.347	164.129
hsa-miR-16-5p	332	12119	6081.33	593.66	324.41	3:hsa;hsa-mir-16-2,10,31,+	297.898	162.79
hsa-miR-98-5p	250	11769	11302.3	576.51	315.04	X:hsa;hsa-mir-98,22,43,-	553.651	302.55
hsa-miR-181b-5p	658	10745	5647.75	526.35	287.63	9:hsa;hsa-mir-181b-2,16,38,+	276.659	151.184
hsa-miR-192-5p	497	10741	10735	526.15	287.52	11:hsa;hsa-mir-192,24,44,-	525.861	287.363
hsa-miR-106b-3p	430	10382	10382	508.57	277.91	7:hsa;hsa-mir-106b,52,73,-	508.569	277.914
hsa-miR-181b-5p	614	10320	5222.75	505.53	276.25	1:hsa;hsa-mir-181b-1,36,58,-	255.84	139.807
hsa-miR-744-5p	264	9861	9861	483.05	263.97	17:hsa;hsa-mir-744,11,32,+	483.048	263.967
hsa-miR-196b-5p	318	9301	9295	455.62	248.98	7:hsa;hsa-mir-196b,15,36,-	455.322	248.816
hsa-miR-374b-5p	237	9271	9246	454.15	248.17	X:hsa;hsa-mir-374b,11,32,-	452.921	247.505
hsa-let-7c-5p	317	9270	7483.63	454.1	248.15	21:hsa;hsa-let-7c,11,32,+	366.591	200.328
hsa-miR-484	363	9028	9028	442.24	241.67	16:hsa;hsa-mir-484,8,29,+	442.243	241.669
hsa-let-7a-3p	298	9014	4573.42	441.56	241.29	9:hsa;hsa-let-7a-1,57,77,+	224.032	122.425
hsa-miR-21-3p	396	8894	8894	435.68	238.08	17:hsa;hsa-mir-21,46,66,+	435.678	238.082
hsa-let-7a-3p	268	8879	4438.42	434.94	237.68	22:hsa;hsa-let-7a-3,52,72,+	217.419	118.811
hsa-miR-34a-5p	413	8468	8468	414.81	226.68	1:hsa;hsa-mir-34a,22,43,-	414.811	226.678
hsa-miR-30e-3p	297	8346	8339.5	408.83	223.41	1:hsa;hsa-mir-30e,59,80,+	408.516	223.239
hsa-miR-17-5p	242	8326	8269.17	407.85	222.88	13:hsa;hsa-mir-17,14,36,+	405.071	221.356
hsa-miR-30b-5p	217	8137	8115.67	398.6	217.82	8:hsa;hsa-mir-30b,17,38,-	397.551	217.247
hsa-miR-494-3p	183	7828	7828	383.46	209.55	14:hsa;hsa-mir-494,48,69,+	383.46	209.546
hsa-miR-543	309	7763	7763	380.28	207.81	14:hsa;hsa-mir-543,47,68,+	380.276	207.806
hsa-miR-134-5p	451	7576	7576	371.12	202.8	14:hsa;hsa-mir-134,8,29,+	371.115	202.801
hsa-miR-769-5p	307	7475	7475	366.17	200.1	19:hsa;hsa-mir-769,30,51,+	366.168	200.097
hsa-miR-186-5p	312	7344	7344	359.75	196.59	1:hsa;hsa-mir-186,15,36,-	359.751	196.59
hsa-miR-361-3p	377	7316	7316	358.38	195.84	X:hsa;hsa-mir-361,45,67,-	358.379	195.841
hsa-miR-136-3p	232	6823	6823	334.23	182.64	14:hsa;hsa-mir-136,49,70,+	334.229	182.644
hsa-miR-107	373	6562	3314.33	321.44	175.66	10:hsa;hsa-mir-107,50,72,-	162.355	88.7208
hsa-miR-503-5p	434	6531	6531	319.93	174.83	X:hsa;hsa-mir-503,6,28,-	319.925	174.827
hsa-miR-145-3p	296	6444	6444	315.66	172.5	5:hsa;hsa-mir-145,54,75,+	315.664	172.498
hsa-miR-455-3p	296	6261	6261	306.7	167.6	9:hsa;hsa-mir-455,54,74,+	306.699	167.6
hsa-miR-99b-3p	411	5951	5951	291.51	159.3	19:hsa;hsa-mir-99b,45,66,+	291.514	159.301
hsa-miR-193a-5p	317	5861	5861	287.1	156.89	17:hsa;hsa-mir-193a,21,42,+	287.105	156.892
hsa-miR-424-3p	243	5695	5695	278.97	152.45	X:hsa;hsa-mir-424,48,68,-	278.973	152.448
hsa-miR-24-2-5p	266	5653	5652	276.92	151.32	19:hsa;hsa-mir-24-2,13,34,-	276.867	151.297
hsa-miR-16-2-3p	238	5276	5276	258.45	141.23	3:hsa;hsa-mir-16-2,53,74,+	258.448	141.232
hsa-miR-450a-5p	166	5266	2643	257.96	140.96	X:hsa;hsa-mir-450a-2,23,44,-	129.469	70.75
hsa-miR-450a-5p	161	5251	2628	257.22	140.56	X:hsa;hsa-mir-450a-1,18,39,-	128.734	70.3485
hsa-miR-452-5p	261	5132	5132	251.39	137.38	X:hsa;hsa-mir-452,14,35,-	251.394	137.378
hsa-miR-130b-5p	129	5079	5079	248.8	135.96	22:hsa;hsa-mir-130b,13,33,+	248.798	135.959
hsa-miR-382-5p	261	4958	4958	242.87	132.72	14:hsa;hsa-mir-382,11,32,+	242.871	132.72
hsa-miR-140-5p	128	4721	4721	231.26	126.38	16:hsa;hsa-mir-140,23,44,+	231.261	126.376
hsa-miR-323a-3p	178	4676	4671.5	229.06	125.17	14:hsa;hsa-mir-323a,51,71,+	228.837	125.051
hsa-miR-214-5p	186	4638	4638	227.2	124.15	1:hsa;hsa-mir-214,30,51,-	227.195	124.154
hsa-miR-29b-3p	213	4412	2197.17	216.12	118.1	1:hsa;hsa-mir-29b-2,52,74,-	107.63	58.8156
hsa-miR-1185-1-3p	153	4405	4288.5	215.78	117.92	14:hsa;hsa-mir-1185-1,53,74,+	210.075	114.798
hsa-miR-29b-3p	212	4403	2188.17	215.68	117.86	7:hsa;hsa-mir-29b-1,51,73,-	107.189	58.5746
hsa-miR-138-5p	294	4392	3110.5	215.15	117.57	3:hsa;hsa-mir-138-1,23,45,+	152.37	83.2644
hsa-miR-889-3p	173	4290	4290	210.15	114.84	14:hsa;hsa-mir-889,49,69,+	210.148	114.838
hsa-miR-450b-5p	120	4205	4205	205.98	112.56	X:hsa;hsa-mir-450b,11,32,-	205.985	112.563
hsa-miR-425-5p	281	4180	4180	204.76	111.89	3:hsa;hsa-mir-425,14,36,-	204.76	111.894
hsa-miR-365b-3p	140	4046	2023.5	198.2	108.31	17:hsa;hsa-mir-365b,68,89,+	99.1225	54.1667
hsa-miR-365a-3p	139	4045	2022.5	198.15	108.28	16:hsa;hsa-mir-365a,56,77,+	99.0735	54.1399
hsa-miR-654-5p	221	4041	4041	197.95	108.17	14:hsa;hsa-mir-654,16,37,+	197.951	108.173
hsa-miR-143-5p	227	4038	4038	197.8	108.09	5:hsa;hsa-mir-143,27,48,+	197.804	108.093
hsa-miR-22-5p	125	3970	3970	194.47	106.27	17:hsa;hsa-mir-22,15,36,-	194.473	106.272
hsa-miR-3615	301	3960	3960	193.98	106	17:hsa;hsa-mir-3615,51,71,+	193.983	106.005
hsa-miR-127-5p	252	3756	3756	183.99	100.54	14:hsa;hsa-mir-127,23,44,+	183.99	100.544
hsa-miR-382-3p	162	3681	3681	180.32	98.54	14:hsa;hsa-mir-382,47,67,+	180.316	98.536
hsa-miR-10b-5p	148	3529	3522.5	172.87	94.47	2:hsa;hsa-mir-10b,27,49,+	172.552	94.2932
hsa-miR-409-5p	170	3527	3527	172.77	94.41	14:hsa;hsa-mir-409,15,37,+	172.772	94.4136
hsa-miR-629-5p	150	3504	3504	171.65	93.8	15:hsa;hsa-mir-629,22,42,-	171.646	93.798
hsa-miR-660-5p	117	3425	3425	167.78	91.68	X:hsa;hsa-mir-660,16,37,+	167.776	91.6832
hsa-miR-542-3p	246	3353	3353	164.25	89.76	X:hsa;hsa-mir-542,53,74,-	164.249	89.7559
hsa-miR-181a-2-3p	143	3312	3312	162.24	88.66	9:hsa;hsa-mir-181a-2,77,98,+	162.241	88.6583
hsa-miR-181a-3p	155	3274	3267.5	160.38	87.64	1:hsa;hsa-mir-181a-1,64,85,-	160.061	87.4671
hsa-miR-126-3p	159	3150	3150	154.3	84.32	9:hsa;hsa-mir-126,52,73,+	154.305	84.3218
hsa-miR-495-3p	223	3063	3063	150.04	81.99	14:hsa;hsa-mir-495,50,71,+	150.043	81.9929
hsa-miR-320a	608	2981	2898.7	146.03	79.8	8:hsa;hsa-mir-320a,48,69,-	141.995	77.5948
hsa-miR-193b-3p	185	2963	2963	145.14	79.32	16:hsa;hsa-mir-193b,51,72,+	145.145	79.316
hsa-let-7d-3p	168	2920	2920	143.04	78.16	9:hsa;hsa-let-7d,62,83,+	143.038	78.165
hsa-miR-138-5p	225	2899	1617.5	142.01	77.6	16:hsa;hsa-mir-138-2,10,32,+	79.2343	43.2986
hsa-let-7b-3p	160	2850	2846.58	139.61	76.29	22:hsa;hsa-let-7b,60,81,+	139.442	76.1997
hsa-miR-758-3p	120	2845	2845	139.36	76.16	14:hsa;hsa-mir-758,52,73,+	139.364	76.1573
hsa-miR-15b-5p	108	2831	2830.5	138.68	75.78	3:hsa;hsa-mir-15b,20,41,+	138.654	75.7692
hsa-miR-411-3p	112	2693	2691.5	131.92	72.09	14:hsa;hsa-mir-411,51,72,+	131.845	72.0483
hsa-miR-210-3p	326	2674	2674	130.99	71.58	11:hsa;hsa-mir-210,66,87,-	130.988	71.5798
hsa-miR-500a-3p	194	2625	2280.17	128.59	70.27	X:hsa;hsa-mir-500a,52,73,+	111.695	61.0374
hsa-miR-196a-5p	124	2536	1491	124.23	67.89	12:hsa;hsa-mir-196a-2,25,46,+	73.0376	39.9123
hsa-miR-486-5p	172	2448	1365	119.92	65.53	8:hsa;hsa-mir-486-2,1,22,+	66.8654	36.5394
hsa-miR-424-5p	128	2404	2404	117.76	64.35	X:hsa;hsa-mir-424,11,32,-	117.762	64.3523
hsa-miR-32-5p	78	2386	2386	116.88	63.87	9:hsa;hsa-mir-32,6,27,-	116.88	63.8704
hsa-miR-625-3p	291	2346	2346	114.92	62.8	14:hsa;hsa-mir-625,52,73,+	114.92	62.7997
hsa-miR-106b-5p	154	2325	2325	113.89	62.24	7:hsa;hsa-mir-106b,12,32,-	113.892	62.2375
hsa-miR-374a-5p	102	2262	2252.5	110.81	60.55	X:hsa;hsa-mir-374a,12,33,-	110.34	60.2968
hsa-miR-486-5p	165	2248	1165	110.12	60.18	8:hsa;hsa-mir-486-1,4,25,-	57.0683	31.1857
hsa-miR-30c-2-3p	114	2247	2246	110.07	60.15	6:hsa;hsa-mir-30c-2,47,68,-	110.022	60.1228
hsa-miR-149-5p	151	2156	2156	105.61	57.71	2:hsa;hsa-mir-149,15,37,+	105.613	57.7136
hsa-miR-196a-5p	107	2139	1094	104.78	57.26	17:hsa;hsa-mir-196a-1,7,28,-	53.5903	29.2851
hsa-miR-19b-3p	111	2092	1059.83	102.48	56	X:hsa;hsa-mir-19b-2,62,84,-	51.9166	28.3705
hsa-miR-19b-3p	105	2068	1036.33	101.3	55.36	13:hsa;hsa-mir-19b-1,54,76,+	50.7655	27.7414
hsa-miR-615-3p	129	1980	1980	96.99	53	12:hsa;hsa-mir-615,61,82,+	96.9916	53.0023
hsa-miR-1180-3p	148	1953	1953	95.67	52.28	17:hsa;hsa-mir-1180,41,62,-	95.669	52.2795
hsa-miR-132-3p	137	1861	1861	91.16	49.82	17:hsa;hsa-mir-132,59,80,-	91.1623	49.8168
hsa-miR-330-3p	201	1836	1836	89.94	49.15	19:hsa;hsa-mir-330,57,79,-	89.9377	49.1476
hsa-miR-369-3p	80	1833	1833	89.79	49.07	14:hsa;hsa-mir-369,44,64,+	89.7907	49.0673
hsa-miR-181d-5p	207	1824	1822	89.35	48.83	19:hsa;hsa-mir-181d,36,58,+	89.2519	48.7728
hsa-miR-671-3p	197	1784	1784	87.39	47.76	7:hsa;hsa-mir-671,68,88,+	87.3904	47.7556
hsa-miR-339-3p	152	1765	1765	86.46	47.25	7:hsa;hsa-mir-339,50,72,-	86.4597	47.247
hsa-miR-125b-2-3p	153	1748	1748	85.63	46.79	21:hsa;hsa-mir-125b-2,54,75,+	85.6269	46.7919
hsa-miR-490-3p	144	1701	1701	83.32	45.53	7:hsa;hsa-mir-490,76,97,+	83.3246	45.5338
hsa-miR-3117-3p	186	1661	1661	81.37	44.46	1:hsa;hsa-mir-3117,46,66,+	81.3652	44.463
hsa-miR-1307-5p	127	1655	1655	81.07	44.3	10:hsa;hsa-mir-1307,41,61,-	81.0713	44.3024
hsa-miR-130a-3p	155	1641	1640	80.39	43.93	11:hsa;hsa-mir-130a,55,76,+	80.3365	43.9009
hsa-miR-329-3p	183	1605	802.5	78.62	42.96	14:hsa;hsa-mir-329-1,50,71,+	39.311	21.482
hsa-miR-329-3p	183	1605	802.5	78.62	42.96	14:hsa;hsa-mir-329-2,52,73,+	39.311	21.482
hsa-miR-369-5p	72	1552	1552	76.03	41.55	14:hsa;hsa-mir-369,9,30,+	76.0257	41.5452
hsa-miR-27a-5p	104	1511	1511	74.02	40.45	19:hsa;hsa-mir-27a,10,31,-	74.0173	40.4477
hsa-miR-345-5p	124	1496	1496	73.28	40.05	14:hsa;hsa-mir-345,18,39,+	73.2825	40.0462
hsa-miR-505-3p	126	1331	1331	65.2	35.63	X:hsa;hsa-mir-505,51,72,-	65.1999	35.6293
hsa-miR-299-3p	108	1324	1324	64.86	35.44	14:hsa;hsa-mir-299,39,60,+	64.857	35.4419
hsa-miR-7977	7	1322	1322	64.76	35.39	3:hsa;hsa-mir-7977,1,18,+	64.759	35.3884
hsa-miR-485-3p	137	1321	1321	64.71	35.36	14:hsa;hsa-mir-485,46,67,+	64.7101	35.3616
hsa-miR-487b-3p	111	1320	1320	64.66	35.33	14:hsa;hsa-mir-487b,51,72,+	64.6611	35.3348
hsa-miR-331-3p	104	1319	1319	64.61	35.31	12:hsa;hsa-mir-331,61,81,+	64.6121	35.3081
hsa-miR-1287-5p	95	1304	1304	63.88	34.91	10:hsa;hsa-mir-1287,16,37,-	63.8773	34.9065
hsa-miR-136-5p	95	1291	1291	63.24	34.56	14:hsa;hsa-mir-136,15,37,+	63.2405	34.5586
hsa-miR-502-3p	117	1289	945.17	63.14	34.51	X:hsa;hsa-mir-502,52,73,+	46.2996	25.301
hsa-miR-432-5p	132	1260	1260	61.72	33.73	14:hsa;hsa-mir-432,14,36,+	61.7219	33.7287
hsa-miR-410-3p	73	1237	1237	60.6	33.11	14:hsa;hsa-mir-410,50,70,+	60.5953	33.113
hsa-miR-129-5p	86	1204	604	58.98	32.23	7:hsa;hsa-mir-129-1,5,25,+	29.5873	16.1684
hsa-miR-129-5p	85	1202	602	58.88	32.18	11:hsa;hsa-mir-129-2,15,35,+	29.4894	16.1148
hsa-miR-7974	67	1139	1139	55.79	30.49	19:hsa;hsa-mir-7974,56,79,-	55.7947	30.4897
hsa-miR-539-3p	96	1133	1133	55.5	30.33	14:hsa;hsa-mir-539,49,70,+	55.5008	30.3291
hsa-miR-589-5p	76	1128	1128	55.26	30.2	7:hsa;hsa-mir-589,24,45,-	55.2558	30.1952
hsa-miR-323b-3p	65	1122	1117.5	54.96	30.03	14:hsa;hsa-mir-323b,51,72,+	54.7415	29.9142
hsa-miR-501-3p	94	1086	1083.17	53.2	29.07	X:hsa;hsa-mir-501,51,72,+	53.0596	28.9951
hsa-miR-1296-5p	131	1069	1069	52.37	28.62	10:hsa;hsa-mir-1296,16,37,-	52.3657	28.6159
hsa-miR-454-3p	96	1064	1064	52.12	28.48	17:hsa;hsa-mir-454,64,86,-	52.1207	28.482
hsa-let-7i-3p	60	1063	1063	52.07	28.46	12:hsa;hsa-let-7i,62,83,+	52.0718	28.4553
hsa-miR-433-3p	121	1062	1062	52.02	28.43	14:hsa;hsa-mir-433,64,85,+	52.0228	28.4285
hsa-miR-19a-3p	97	1035	1033.83	50.7	27.71	13:hsa;hsa-mir-19a,49,71,+	50.643	27.6745
hsa-miR-425-3p	148	1029	1029	50.41	27.55	3:hsa;hsa-mir-425,55,76,-	50.4062	27.5451
hsa-miR-5100	6	976	976	47.81	26.13	10:hsa;hsa-mir-5100,68,89,+	47.81	26.1264
hsa-miR-4521	187	971	971	47.57	25.99	17:hsa;hsa-mir-4521,4,25,+	47.5651	25.9925
hsa-miR-342-3p	100	966	966	47.32	25.86	14:hsa;hsa-mir-342,61,83,+	47.3201	25.8587
hsa-miR-296-3p	133	945	945	46.29	25.3	20:hsa;hsa-mir-296,48,69,-	46.2914	25.2965
hsa-miR-485-5p	89	903	903	44.23	24.17	14:hsa;hsa-mir-485,9,30,+	44.2341	24.1722
hsa-miR-377-3p	65	888	888	43.5	23.77	14:hsa;hsa-mir-377,45,66,+	43.4993	23.7707
hsa-miR-15b-3p	71	886	886	43.4	23.72	3:hsa;hsa-mir-15b,58,79,+	43.4013	23.7172
hsa-miR-27b-5p	82	882	882	43.21	23.61	9:hsa;hsa-mir-27b,19,40,+	43.2054	23.6101
hsa-miR-7706	106	876	876	42.91	23.45	15:hsa;hsa-mir-7706,44,67,+	42.9114	23.4495
hsa-miR-181c-3p	82	876	869.5	42.91	23.45	19:hsa;hsa-mir-181c,65,86,+	42.593	23.2755
hsa-miR-671-5p	124	872	872	42.72	23.34	7:hsa;hsa-mir-671,29,51,+	42.7155	23.3424
hsa-miR-376c-3p	73	867	865	42.47	23.21	14:hsa;hsa-mir-376c,43,63,+	42.3726	23.155
hsa-miR-148b-5p	88	843	843	41.29	22.57	12:hsa;hsa-mir-148b,25,46,+	41.2949	22.5661
hsa-miR-132-5p	63	789	789	38.65	21.12	17:hsa;hsa-mir-132,23,44,-	38.6497	21.1206
hsa-miR-656-3p	44	769	769	37.67	20.59	14:hsa;hsa-mir-656,43,63,+	37.67	20.5852
hsa-let-7f-2-3p	57	757	754.33	37.08	20.26	X:hsa;hsa-let-7f-2,58,79,-	36.9515	20.1926
hsa-miR-1185-2-3p	107	753	636.5	36.89	20.16	14:hsa;hsa-mir-1185-2,53,74,+	31.1794	17.0384
hsa-miR-1278	62	734	734	35.96	19.65	1:hsa;hsa-mir-1278,50,71,+	35.9555	19.6483
hsa-miR-362-5p	70	732	732	35.86	19.59	X:hsa;hsa-mir-362,5,28,+	35.8575	19.5948
hsa-miR-185-3p	69	727	727	35.61	19.46	22:hsa;hsa-mir-185,50,71,+	35.6126	19.4609
hsa-miR-148a-5p	56	724	724	35.47	19.38	7:hsa;hsa-mir-148a,6,27,-	35.4656	19.3806
hsa-miR-549a	72	710	710	34.78	19.01	15:hsa;hsa-mir-549a,61,81,-	34.7798	19.0059
hsa-miR-337-3p	76	705	705	34.53	18.87	14:hsa;hsa-mir-337,61,82,+	34.5349	18.872
hsa-miR-598-3p	81	705	705	34.53	18.87	8:hsa;hsa-mir-598,61,82,-	34.5349	18.872
hsa-miR-196a-3p	38	692	692	33.9	18.52	12:hsa;hsa-mir-196a-2,62,83,+	33.8981	18.524
hsa-miR-31-3p	73	665	665	32.58	17.8	9:hsa;hsa-mir-31,44,65,-	32.5755	17.8013
hsa-miR-3909	72	643	643	31.5	17.21	22:hsa;hsa-mir-3909,71,92,+	31.4978	17.2124
hsa-miR-212-5p	65	625	625	30.62	16.73	17:hsa;hsa-mir-212,31,53,-	30.616	16.7305
hsa-miR-340-3p	60	619	619	30.32	16.57	5:hsa;hsa-mir-340,58,79,-	30.3221	16.5699
hsa-miR-15a-5p	80	612	611.5	29.98	16.38	13:hsa;hsa-mir-15a,14,35,-	29.9547	16.3691
hsa-miR-152-5p	67	611	611	29.93	16.36	17:hsa;hsa-mir-152,16,38,-	29.9302	16.3558
hsa-miR-379-3p	35	595	593.5	29.15	15.93	14:hsa;hsa-mir-379,44,65,+	29.073	15.8873
hsa-miR-874-3p	69	588	588	28.8	15.74	5:hsa;hsa-mir-874,47,68,-	28.8036	15.7401
hsa-miR-92b-5p	80	580	580	28.41	15.53	1:hsa;hsa-mir-92b,20,41,+	28.4117	15.5259
hsa-miR-1301-3p	96	571	571	27.97	15.28	2:hsa;hsa-mir-1301,48,71,-	27.9708	15.285
hsa-miR-7704	25	571	571	27.97	15.28	2:hsa;hsa-mir-7704,1,19,+	27.9708	15.285
hsa-miR-194-5p	56	562	349	27.53	15.04	11:hsa;hsa-mir-194-2,15,36,-	17.096	9.34232
hsa-let-7f-1-3p	74	550	547.25	26.94	14.72	9:hsa;hsa-let-7f-1,63,84,+	26.8074	14.6492
hsa-miR-3607-3p	78	521	521	25.52	13.95	5:hsa;hsa-mir-3607,51,70,+	25.5215	13.9466
hsa-miR-376a-3p	56	520	260	25.47	13.92	14:hsa;hsa-mir-376a-2,50,70,+	12.7363	6.95989
hsa-miR-204-5p	42	520	519	25.47	13.92	9:hsa;hsa-mir-204,33,54,-	25.4236	13.893
hsa-miR-376a-3p	55	519	259	25.42	13.89	14:hsa;hsa-mir-376a-1,44,64,+	12.6873	6.93313
hsa-miR-3158-3p	50	518	259	25.37	13.87	10:hsa;hsa-mir-3158-1,50,71,+	12.6873	6.93313
hsa-miR-3158-3p	50	518	259	25.37	13.87	10:hsa;hsa-mir-3158-2,50,71,-	12.6873	6.93313
hsa-miR-4677-3p	39	516	516	25.28	13.81	1:hsa;hsa-mir-4677,50,71,+	25.2766	13.8127
hsa-miR-421	75	510	510	24.98	13.65	X:hsa;hsa-mir-421,48,70,-	24.9827	13.6521
hsa-miR-330-5p	62	504	504	24.69	13.49	19:hsa;hsa-mir-330,18,39,-	24.6888	13.4915
hsa-miR-431-3p	118	487	487	23.86	13.04	14:hsa;hsa-mir-431,63,84,+	23.856	13.0364
hsa-miR-1304-3p	31	487	487	23.86	13.04	11:hsa;hsa-mir-1304,53,74,-	23.856	13.0364
hsa-miR-431-5p	60	486	486	23.81	13.01	14:hsa;hsa-mir-431,20,40,+	23.807	13.0096
hsa-miR-194-5p	45	476	263	23.32	12.74	1:hsa;hsa-mir-194-1,15,36,-	12.8832	7.0402
hsa-miR-29c-3p	83	474	444.17	23.22	12.69	1:hsa;hsa-mir-29c,54,75,-	21.7578	11.8898
hsa-miR-582-3p	49	456	456	22.34	12.21	5:hsa;hsa-mir-582,53,74,-	22.3375	12.2066
hsa-let-7e-3p	59	448	446	21.95	11.99	19:hsa;hsa-let-7e,53,74,+	21.8476	11.9389
hsa-miR-222-5p	111	444	444	21.75	11.89	X:hsa;hsa-mir-222,31,52,-	21.7496	11.8854
hsa-miR-18a-5p	40	430	426.5	21.06	11.51	13:hsa;hsa-mir-18a,6,28,+	20.8924	11.4169
hsa-miR-125a-3p	74	429	429	21.01	11.48	19:hsa;hsa-mir-125a,53,74,+	21.0148	11.4838
hsa-miR-655-3p	44	415	415	20.33	11.11	14:hsa;hsa-mir-655,61,82,+	20.329	11.1091
hsa-miR-340-5p	106	413	413	20.23	11.06	5:hsa;hsa-mir-340,16,37,-	20.2311	11.0555
hsa-miR-1-3p	32	411	219	20.13	11	18:hsa;hsa-mir-1-2,53,74,-	10.7279	5.86237
hsa-miR-652-3p	60	411	411	20.13	11	X:hsa;hsa-mir-652,61,81,+	20.1331	11.002
hsa-miR-185-5p	142	393	393	19.25	10.52	22:hsa;hsa-mir-185,15,36,+	19.2514	10.5201
hsa-miR-1-3p	35	392	200	19.2	10.49	20:hsa;hsa-mir-1-1,46,67,+	9.79713	5.35376
hsa-miR-25-5p	34	391	391	19.15	10.47	7:hsa;hsa-mir-25,14,34,-	19.1534	10.4666
hsa-miR-30d-3p	71	389	385.5	19.06	10.41	8:hsa;hsa-mir-30d,46,67,-	18.884	10.3194
hsa-miR-299-5p	51	373	373	18.27	9.98	14:hsa;hsa-mir-299,7,28,+	18.2717	9.98477
hsa-miR-651-5p	45	364	364	17.83	9.74	X:hsa;hsa-mir-651,16,37,+	17.8308	9.74385
hsa-miR-130b-3p	63	361	360	17.68	9.66	22:hsa;hsa-mir-130b,51,72,+	17.6348	9.63678
hsa-miR-493-3p	130	354	354	17.34	9.48	14:hsa;hsa-mir-493,57,78,+	17.3409	9.47616
hsa-miR-181c-5p	60	349	349	17.1	9.34	19:hsa;hsa-mir-181c,27,48,+	17.096	9.34232
hsa-miR-365a-5p	80	349	349	17.1	9.34	16:hsa;hsa-mir-365a,16,38,+	17.096	9.34232
hsa-miR-10a-5p	54	342	324.5	16.75	9.15	17:hsa;hsa-mir-10a,22,44,-	15.8958	8.68648
hsa-miR-365b-5p	81	332	332	16.26	8.89	17:hsa;hsa-mir-365b,29,50,+	16.2632	8.88725
hsa-miR-532-3p	30	306	306	14.99	8.19	X:hsa;hsa-mir-532,57,78,+	14.9896	8.19126
hsa-miR-2277-5p	38	304	304	14.89	8.14	5:hsa;hsa-mir-2277,18,41,-	14.8916	8.13772
hsa-miR-877-5p	64	299	299	14.65	8	6:hsa;hsa-mir-877,1,20,+	14.6467	8.00388
hsa-miR-147b	63	293	293	14.35	7.84	15:hsa;hsa-mir-147b,49,70,+	14.3528	7.84327
hsa-miR-193b-5p	58	291	291	14.25	7.79	16:hsa;hsa-mir-193b,14,35,+	14.2548	7.78973
hsa-miR-337-5p	43	281	281	13.76	7.52	14:hsa;hsa-mir-337,23,43,+	13.765	7.52204
hsa-miR-182-5p	40	277	277	13.57	7.41	7:hsa;hsa-mir-182,23,46,-	13.569	7.41496
hsa-miR-486-3p	33	270	149.5	13.23	7.23	8:hsa;hsa-mir-486-1,46,66,-	7.32336	4.00194
hsa-miR-1197	22	270	270	13.23	7.23	14:hsa;hsa-mir-1197,57,77,+	13.2261	7.22758
hsa-miR-941	115	267	15.71	13.08	7.15	20:hsa;hsa-mir-941-4,47,69,+	0.769363	0.420428
hsa-miR-941	115	267	15.71	13.08	7.15	20:hsa;hsa-mir-941-5,47,69,+	0.769363	0.420428
hsa-miR-941	115	267	15.71	13.08	7.15	20:hsa;hsa-mir-941-2,47,69,+	0.769363	0.420428
hsa-miR-146b-3p	42	267	267	13.08	7.15	10:hsa;hsa-mir-146b,45,66,+	13.0792	7.14728
hsa-miR-941	115	267	15.71	13.08	7.15	20:hsa;hsa-mir-941-5,47,69,+	0.769363	0.420428
hsa-miR-941	115	267	15.71	13.08	7.15	20:hsa;hsa-mir-941-3,47,69,+	0.769363	0.420428
hsa-miR-941	115	267	15.71	13.08	7.15	20:hsa;hsa-mir-941-5,47,69,+	0.769363	0.420428
hsa-miR-941	115	267	15.71	13.08	7.15	20:hsa;hsa-mir-941-3,47,69,+	0.769363	0.420428
hsa-miR-941	115	267	15.71	13.08	7.15	20:hsa;hsa-mir-941-4,47,69,+	0.769363	0.420428
hsa-miR-941	115	267	15.71	13.08	7.15	20:hsa;hsa-mir-941-2,47,69,+	0.769363	0.420428
hsa-miR-941	115	267	15.71	13.08	7.15	20:hsa;hsa-mir-941-3,47,69,+	0.769363	0.420428
hsa-miR-941	115	267	15.71	13.08	7.15	20:hsa;hsa-mir-941-2,47,69,+	0.769363	0.420428
hsa-miR-941	115	267	15.71	13.08	7.15	20:hsa;hsa-mir-941-5,47,69,+	0.769363	0.420428
hsa-miR-941	115	267	15.71	13.08	7.15	20:hsa;hsa-mir-941-2,47,69,+	0.769363	0.420428
hsa-miR-941	115	267	15.71	13.08	7.15	20:hsa;hsa-mir-941-3,47,69,+	0.769363	0.420428
hsa-miR-941	115	267	15.71	13.08	7.15	20:hsa;hsa-mir-941-1,47,69,+	0.769363	0.420428
hsa-miR-941	115	267	15.71	13.08	7.15	20:hsa;hsa-mir-941-4,47,69,+	0.769363	0.420428
hsa-miR-941	115	267	15.71	13.08	7.15	20:hsa;hsa-mir-941-4,47,69,+	0.769363	0.420428
hsa-miR-2110	44	265	265	12.98	7.09	10:hsa;hsa-mir-2110,8,29,-	12.9812	7.09374
hsa-miR-301a-5p	32	265	265	12.98	7.09	17:hsa;hsa-mir-301a,14,35,-	12.9812	7.09374
hsa-miR-324-5p	41	263	263	12.88	7.04	17:hsa;hsa-mir-324,16,38,-	12.8832	7.0402
hsa-miR-215-5p	29	262	256	12.83	7.01	1:hsa;hsa-mir-215,27,47,-	12.5403	6.85282
hsa-miR-193a-3p	33	248	248	12.15	6.64	17:hsa;hsa-mir-193a,55,76,+	12.1484	6.63867
hsa-miR-29b-1-5p	54	248	246.5	12.15	6.64	7:hsa;hsa-mir-29b-1,10,33,-	12.075	6.59852
hsa-miR-4473	40	246	246	12.05	6.59	9:hsa;hsa-mir-4473,57,78,-	12.0505	6.58513
hsa-miR-486-3p	29	242	121.5	11.85	6.48	8:hsa;hsa-mir-486-2,43,63,+	5.95176	3.25241
hsa-miR-2355-3p	53	240	240	11.76	6.42	2:hsa;hsa-mir-2355,54,75,-	11.7566	6.42452
hsa-miR-374b-3p	38	234	233.5	11.46	6.26	X:hsa;hsa-mir-374b,41,62,-	11.4382	6.25052
hsa-miR-200b-3p	28	232	232	11.36	6.21	1:hsa;hsa-mir-200b,57,78,+	11.3647	6.21037
hsa-miR-331-5p	69	230	230	11.27	6.16	12:hsa;hsa-mir-331,26,47,+	11.2667	6.15683
hsa-miR-641	41	229	229	11.22	6.13	19:hsa;hsa-mir-641,16,39,-	11.2177	6.13006
hsa-miR-377-5p	30	229	229	11.22	6.13	14:hsa;hsa-mir-377,7,28,+	11.2177	6.13006
hsa-miR-487a-3p	32	228	228	11.17	6.1	14:hsa;hsa-mir-487a,49,70,+	11.1687	6.10329
hsa-miR-93-3p	59	221	221	10.83	5.92	7:hsa;hsa-mir-93,50,71,-	10.8258	5.91591
hsa-miR-29a-5p	47	220	220	10.78	5.89	7:hsa;hsa-mir-29a,4,25,-	10.7768	5.88914
hsa-miR-454-5p	22	219	219	10.73	5.86	17:hsa;hsa-mir-454,24,45,-	10.7279	5.86237
hsa-miR-561-5p	23	217	217	10.63	5.81	2:hsa;hsa-mir-561,26,47,+	10.6299	5.80883
hsa-miR-24-1-5p	40	206	205	10.09	5.51	9:hsa;hsa-mir-24-1,7,28,+	10.0421	5.48761
hsa-miR-5010-3p	32	206	206	10.09	5.51	17:hsa;hsa-mir-5010,80,101,+	10.091	5.51438
hsa-miR-664a-3p	24	206	206	10.09	5.51	1:hsa;hsa-mir-664a,49,71,-	10.091	5.51438
hsa-miR-32-3p	23	206	206	10.09	5.51	9:hsa;hsa-mir-32,47,68,-	10.091	5.51438
hsa-miR-138-1-3p	50	202	202	9.9	5.41	3:hsa;hsa-mir-138-1,63,84,+	9.8951	5.4073
hsa-miR-1248	47	201	201	9.85	5.38	3:hsa;hsa-mir-1248,4,30,+	9.84612	5.38053
hsa-miR-17-3p	46	200	200	9.8	5.35	13:hsa;hsa-mir-17,51,72,+	9.79713	5.35376
hsa-miR-2682-5p	38	199	199	9.75	5.33	1:hsa;hsa-mir-2682,23,45,-	9.74815	5.327
hsa-miR-9-5p	34	197	66.33	9.65	5.27	15:hsa;hsa-mir-9-3,16,38,+	3.24938	1.77567
hsa-miR-9-5p	33	196	65.33	9.6	5.25	5:hsa;hsa-mir-9-2,16,38,-	3.2004	1.7489
hsa-miR-9-5p	33	196	65.33	9.6	5.25	1:hsa;hsa-mir-9-1,16,38,-	3.2004	1.7489
hsa-miR-29c-5p	45	187	187	9.16	5.01	1:hsa;hsa-mir-29c,16,37,-	9.16032	5.00577
hsa-miR-4461	100	187	187	9.16	5.01	5:hsa;hsa-mir-4461,46,68,+	9.16032	5.00577
hsa-miR-499a-5p	24	186	186	9.11	4.98	20:hsa;hsa-mir-499a,33,53,+	9.11133	4.979
hsa-miR-33a-5p	23	185	184.5	9.06	4.95	22:hsa;hsa-mir-33a,6,26,+	9.03785	4.93885
hsa-miR-574-3p	89	180	180	8.82	4.82	4:hsa;hsa-mir-574,61,82,+	8.81742	4.81839
hsa-miR-320b	77	179	66.87	8.77	4.79	1:hsa;hsa-mir-320b-1,39,60,+	3.27559	1.78998
hsa-miR-320b	77	179	66.37	8.77	4.79	1:hsa;hsa-mir-320b-2,72,93,-	3.25109	1.7766
hsa-miR-34c-3p	37	178	178	8.72	4.76	11:hsa;hsa-mir-34c,46,67,+	8.71945	4.76485
hsa-miR-539-5p	28	176	176	8.62	4.71	14:hsa;hsa-mir-539,9,30,+	8.62148	4.71131
hsa-miR-3176	48	171	171	8.38	4.58	16:hsa;hsa-mir-3176,60,78,+	8.37655	4.57747
hsa-miR-154-5p	24	170	170	8.33	4.55	14:hsa;hsa-mir-154,15,36,+	8.32756	4.5507
hsa-miR-34b-3p	36	169	169	8.28	4.52	11:hsa;hsa-mir-34b,50,71,+	8.27858	4.52393
hsa-miR-7976	18	168	168	8.23	4.5	3:hsa;hsa-mir-7976,1,19,-	8.22959	4.49716
hsa-miR-23b-5p	38	168	168	8.23	4.5	9:hsa;hsa-mir-23b,20,41,+	8.22959	4.49716
hsa-miR-585-3p	35	167	167	8.18	4.47	5:hsa;hsa-mir-585,61,79,-	8.18061	4.47039
hsa-miR-18a-3p	39	162	161.5	7.94	4.34	13:hsa;hsa-mir-18a,47,69,+	7.91118	4.32317
hsa-miR-550a-5p	51	162	78.7	7.94	4.34	7:hsa;hsa-mir-550a-1,22,44,+	3.85517	2.10671
hsa-miR-584-5p	74	162	162	7.94	4.34	5:hsa;hsa-mir-584,16,37,-	7.93568	4.33655
hsa-miR-550a-5p	51	162	78.7	7.94	4.34	7:hsa;hsa-mir-550a-2,22,44,+	3.85517	2.10671
hsa-miR-887-3p	56	161	161	7.89	4.31	5:hsa;hsa-mir-887,48,69,+	7.88669	4.30978
hsa-miR-7-1-3p	28	160	160	7.84	4.28	9:hsa;hsa-mir-7-1,66,87,-	7.83771	4.28301
hsa-miR-374a-3p	76	160	160	7.84	4.28	X:hsa;hsa-mir-374a,42,63,-	7.83771	4.28301
hsa-miR-1306-5p	32	159	159	7.79	4.26	22:hsa;hsa-mir-1306,15,36,+	7.78872	4.25624
hsa-miR-942-5p	40	156	156	7.64	4.18	1:hsa;hsa-mir-942,13,34,+	7.64176	4.17594
hsa-miR-380-5p	19	150	150	7.35	4.02	14:hsa;hsa-mir-380,5,26,+	7.34785	4.01532
hsa-miR-296-5p	19	148	148	7.25	3.96	20:hsa;hsa-mir-296,14,34,-	7.24988	3.96179
hsa-miR-30c-1-3p	37	146	145	7.15	3.91	1:hsa;hsa-mir-30c-1,56,77,+	7.10292	3.88148
hsa-miR-3129-3p	46	144	144	7.05	3.85	2:hsa;hsa-mir-3129,47,68,-	7.05394	3.85471
hsa-miR-760	31	144	144	7.05	3.85	1:hsa;hsa-mir-760,49,68,+	7.05394	3.85471
hsa-miR-370-5p	35	143	143	7	3.83	14:hsa;hsa-mir-370,13,34,+	7.00495	3.82794
hsa-miR-887-5p	45	139	139	6.81	3.72	5:hsa;hsa-mir-887,10,30,+	6.80901	3.72087
hsa-miR-1260b	10	139	139	6.81	3.72	11:hsa;hsa-mir-1260b,10,28,+	6.80901	3.72087
hsa-miR-3928-3p	26	135	135	6.61	3.61	22:hsa;hsa-mir-3928,37,58,-	6.61306	3.61379
hsa-miR-224-3p	30	134	134	6.56	3.59	X:hsa;hsa-mir-224,53,75,-	6.56408	3.58702
hsa-miR-154-3p	20	133	133	6.52	3.56	14:hsa;hsa-mir-154,51,72,+	6.51509	3.56025
hsa-miR-137	39	130	130	6.37	3.48	1:hsa;hsa-mir-137,59,81,-	6.36814	3.47995
hsa-miR-501-5p	23	127	127	6.22	3.4	X:hsa;hsa-mir-501,14,35,+	6.22118	3.39964
hsa-miR-625-5p	16	127	127	6.22	3.4	14:hsa;hsa-mir-625,15,35,+	6.22118	3.39964
hsa-miR-1292-5p	48	127	127	6.22	3.4	20:hsa;hsa-mir-1292,3,27,+	6.22118	3.39964
hsa-let-7a-2-3p	30	125	122.5	6.12	3.35	11:hsa;hsa-let-7a-2,50,71,-	6.00074	3.27918
hsa-miR-744-3p	20	122	122	5.98	3.27	17:hsa;hsa-mir-744,68,89,+	5.97625	3.2658
hsa-miR-188-5p	22	122	122	5.98	3.27	X:hsa;hsa-mir-188,15,35,+	5.97625	3.2658
hsa-miR-200c-3p	23	122	122	5.98	3.27	12:hsa;hsa-mir-200c,44,66,+	5.97625	3.2658
hsa-miR-3687	74	121	15.12	5.93	3.24	KI270733.1:hsa;hsa-mir-3687-2,35,58,+	0.740908	0.404878
hsa-miR-3687	74	121	15.12	5.93	3.24	21:hsa;hsa-mir-3687-2,35,58,+	0.740908	0.404878
hsa-miR-3687	74	121	15.12	5.93	3.24	21:hsa;hsa-mir-3687-1,35,58,+	0.740908	0.404878
hsa-miR-3687	74	121	15.12	5.93	3.24	KI270733.1:hsa;hsa-mir-3687-2,35,58,+	0.740908	0.404878
hsa-miR-3687	74	121	15.12	5.93	3.24	KI270733.1:hsa;hsa-mir-3687-1,35,58,+	0.740908	0.404878
hsa-miR-3687	74	121	15.12	5.93	3.24	21:hsa;hsa-mir-3687-2,35,58,+	0.740908	0.404878
hsa-miR-3687	74	121	15.12	5.93	3.24	21:hsa;hsa-mir-3687-1,35,58,+	0.740908	0.404878
hsa-miR-3687	74	121	15.12	5.93	3.24	KI270733.1:hsa;hsa-mir-3687-1,35,58,+	0.740908	0.404878
hsa-miR-183-5p	24	119	119	5.83	3.19	7:hsa;hsa-mir-183,27,48,-	5.82929	3.18549
hsa-miR-4746-5p	19	119	119	5.83	3.19	19:hsa;hsa-mir-4746,10,32,+	5.82929	3.18549
hsa-miR-1249-3p	21	115	115	5.63	3.08	22:hsa;hsa-mir-1249,41,62,-	5.63335	3.07841
hsa-miR-3177-3p	23	115	115	5.63	3.08	16:hsa;hsa-mir-3177,54,74,+	5.63335	3.07841
hsa-miR-126-5p	25	113	113	5.54	3.02	9:hsa;hsa-mir-126,15,35,+	5.53538	3.02488
hsa-miR-212-3p	34	111	111	5.44	2.97	17:hsa;hsa-mir-212,71,91,-	5.43741	2.97134
hsa-miR-1260a	12	110	110	5.39	2.94	14:hsa;hsa-mir-1260a,14,31,+	5.38842	2.94457
hsa-miR-195-5p	24	106	101.33	5.19	2.84	17:hsa;hsa-mir-195,15,35,-	4.96388	2.71257
hsa-miR-450a-2-3p	23	92	92	4.51	2.46	X:hsa;hsa-mir-450a-2,58,79,-	4.50668	2.46273
hsa-miR-6720-3p	21	92	92	4.51	2.46	6:hsa;hsa-mir-6720,67,88,-	4.50668	2.46273
hsa-miR-29b-2-5p	29	92	90.5	4.51	2.46	1:hsa;hsa-mir-29b-2,11,32,-	4.4332	2.42258
hsa-miR-3912-3p	20	91	91	4.46	2.44	5:hsa;hsa-mir-3912,63,83,-	4.4577	2.43596
hsa-miR-191-3p	27	90	90	4.41	2.41	3:hsa;hsa-mir-191,58,79,-	4.40871	2.40919
hsa-miR-769-3p	24	88	88	4.31	2.36	19:hsa;hsa-mir-769,69,91,+	4.31074	2.35566
hsa-miR-361-5p	55	88	88	4.31	2.36	X:hsa;hsa-mir-361,6,27,-	4.31074	2.35566
hsa-miR-335-3p	34	88	88	4.31	2.36	7:hsa;hsa-mir-335,52,73,+	4.31074	2.35566
hsa-miR-197-3p	40	88	88	4.31	2.36	1:hsa;hsa-mir-197,48,69,+	4.31074	2.35566
hsa-miR-3605-3p	30	87	87	4.26	2.33	1:hsa;hsa-mir-3605,66,88,-	4.26175	2.32889
hsa-miR-342-5p	35	86	86	4.21	2.3	14:hsa;hsa-mir-342,19,39,+	4.21277	2.30212
hsa-miR-26b-3p	20	85	85	4.16	2.28	2:hsa;hsa-mir-26b,47,68,+	4.16378	2.27535
hsa-miR-3940-3p	27	85	85	4.16	2.28	19:hsa;hsa-mir-3940,57,78,-	4.16378	2.27535
hsa-miR-3661	22	85	85	4.16	2.28	5:hsa;hsa-mir-3661,21,42,+	4.16378	2.27535
hsa-miR-376c-5p	18	84	49.5	4.11	2.25	14:hsa;hsa-mir-376c,5,25,+	2.42479	1.32506
hsa-miR-23a-5p	26	84	84	4.11	2.25	19:hsa;hsa-mir-23a,9,30,-	4.1148	2.24858
hsa-miR-5701	11	81	6.75	3.97	2.17	KI270727.1:hsa;hsa-mir-5701-1,10,28,+	0.330653	0.18069
hsa-miR-5701	11	81	6.75	3.97	2.17	15:hsa;hsa-mir-5701-1,10,28,+	0.330653	0.18069
hsa-miR-5701	11	81	6.75	3.97	2.17	KI270727.1:hsa;hsa-mir-5701-3,10,28,+	0.330653	0.18069
hsa-miR-5701	11	81	6.75	3.97	2.17	15:hsa;hsa-mir-5701-2,10,28,+	0.330653	0.18069
hsa-miR-5701	11	81	6.75	3.97	2.17	15:hsa;hsa-mir-5701-2,10,28,+	0.330653	0.18069
hsa-miR-5701	11	81	6.75	3.97	2.17	15:hsa;hsa-mir-5701-1,10,28,+	0.330653	0.18069
hsa-miR-3129-5p	22	81	81	3.97	2.17	2:hsa;hsa-mir-3129,9,30,-	3.96784	2.16827
hsa-miR-5701	11	81	6.75	3.97	2.17	15:hsa;hsa-mir-5701-3,10,28,+	0.330653	0.18069
hsa-miR-5701	11	81	6.75	3.97	2.17	15:hsa;hsa-mir-5701-2,10,28,+	0.330653	0.18069
hsa-miR-5701	11	81	6.75	3.97	2.17	15:hsa;hsa-mir-5701-1,10,28,+	0.330653	0.18069
hsa-miR-5701	11	81	6.75	3.97	2.17	15:hsa;hsa-mir-5701-3,10,28,+	0.330653	0.18069
hsa-miR-5701	11	81	6.75	3.97	2.17	KI270727.1:hsa;hsa-mir-5701-2,10,28,+	0.330653	0.18069
hsa-miR-5701	11	81	6.75	3.97	2.17	15:hsa;hsa-mir-5701-3,10,28,+	0.330653	0.18069
hsa-miR-1291	23	80	80	3.92	2.14	12:hsa;hsa-mir-1291,14,37,-	3.91885	2.14151
hsa-miR-490-5p	13	80	80	3.92	2.14	7:hsa;hsa-mir-490,39,58,+	3.91885	2.14151
hsa-miR-328-3p	49	79	79	3.87	2.11	16:hsa;hsa-mir-328,48,69,-	3.86987	2.11474
hsa-miR-1468-5p	16	79	79	3.87	2.11	X:hsa;hsa-mir-1468,13,33,-	3.86987	2.11474
hsa-miR-504-5p	16	78	78	3.82	2.09	X:hsa;hsa-mir-504,13,34,-	3.82088	2.08797
hsa-miR-30b-3p	18	78	78	3.82	2.09	8:hsa;hsa-mir-30b,55,76,-	3.82088	2.08797
hsa-miR-6501-5p	17	77	77	3.77	2.06	21:hsa;hsa-mir-6501,3,24,+	3.7719	2.0612
hsa-miR-659-5p	21	77	77	3.77	2.06	22:hsa;hsa-mir-659,22,43,-	3.7719	2.0612
hsa-miR-1306-3p	26	76	76	3.72	2.03	22:hsa;hsa-mir-1306,55,72,+	3.72291	2.03443
hsa-miR-940	28	75	75	3.67	2.01	16:hsa;hsa-mir-940,60,80,+	3.67392	2.00766
hsa-miR-20b-5p	13	75	31.83	3.67	2.01	X:hsa;hsa-mir-20b,6,28,-	1.55938	0.852141
hsa-miR-3167	21	74	74	3.62	1.98	11:hsa;hsa-mir-3167,54,75,-	3.62494	1.98089
hsa-miR-1908-5p	18	73	73	3.58	1.95	11:hsa;hsa-mir-1908,12,32,-	3.57595	1.95412
hsa-miR-376a-5p	22	73	73	3.58	1.95	14:hsa;hsa-mir-376a-1,7,28,+	3.57595	1.95412
hsa-miR-579-5p	15	73	73	3.58	1.95	5:hsa;hsa-mir-579,25,46,-	3.57595	1.95412
hsa-miR-376b-5p	17	72	37.5	3.53	1.93	14:hsa;hsa-mir-376b,24,45,+	1.83696	1.00383
hsa-miR-98-3p	25	71	71	3.48	1.9	X:hsa;hsa-mir-98,80,101,-	3.47798	1.90059
hsa-miR-28-3p	42	71	71	3.48	1.9	3:hsa;hsa-mir-28,54,75,+	3.47798	1.90059
hsa-miR-1294	14	71	71	3.48	1.9	5:hsa;hsa-mir-1294,48,69,+	3.47798	1.90059
hsa-miR-181b-3p	25	71	71	3.48	1.9	1:hsa;hsa-mir-181b-1,76,96,-	3.47798	1.90059
hsa-miR-487a-5p	12	71	71	3.48	1.9	14:hsa;hsa-mir-487a,13,34,+	3.47798	1.90059
hsa-miR-195-3p	20	69	69	3.38	1.85	17:hsa;hsa-mir-195,53,74,-	3.38001	1.84705
hsa-miR-496	26	69	69	3.38	1.85	14:hsa;hsa-mir-496,56,77,+	3.38001	1.84705
hsa-miR-1271-5p	46	69	69	3.38	1.85	5:hsa;hsa-mir-1271,15,36,+	3.38001	1.84705
hsa-miR-1293	31	69	69	3.38	1.85	12:hsa;hsa-mir-1293,10,31,-	3.38001	1.84705
hsa-miR-937-3p	20	69	69	3.38	1.85	8:hsa;hsa-mir-937,51,72,-	3.38001	1.84705
hsa-miR-1343-3p	20	68	68	3.33	1.82	11:hsa;hsa-mir-1343,52,73,+	3.33102	1.82028
hsa-miR-628-5p	13	67	67	3.28	1.79	15:hsa;hsa-mir-628,23,44,-	3.28204	1.79351
hsa-miR-26a-2-3p	14	66	65.5	3.23	1.77	12:hsa;hsa-mir-26a-2,52,73,-	3.20856	1.75336
hsa-miR-380-3p	11	66	66	3.23	1.77	14:hsa;hsa-mir-380,40,61,+	3.23305	1.76674
hsa-miR-1245a	18	65	65	3.18	1.74	2:hsa;hsa-mir-1245a,45,65,+	3.18407	1.73997
hsa-miR-326	15	64	64	3.14	1.71	11:hsa;hsa-mir-326,60,79,-	3.13508	1.7132
hsa-miR-668-3p	33	63	63	3.09	1.69	14:hsa;hsa-mir-668,43,65,+	3.0861	1.68644
hsa-miR-128-1-5p	19	63	63	3.09	1.69	2:hsa;hsa-mir-128-1,15,37,+	3.0861	1.68644
hsa-miR-4775	9	62	62	3.04	1.66	2:hsa;hsa-mir-4775,10,31,+	3.03711	1.65967
hsa-miR-412-5p	15	62	62	3.04	1.66	14:hsa;hsa-mir-412,19,41,+	3.03711	1.65967
hsa-miR-4636	19	62	62	3.04	1.66	5:hsa;hsa-mir-4636,10,31,-	3.03711	1.65967
hsa-miR-129-2-3p	15	61	61	2.99	1.63	11:hsa;hsa-mir-129-2,57,78,+	2.98813	1.6329
hsa-miR-3913-5p	30	61	30.5	2.99	1.63	12:hsa;hsa-mir-3913-2,22,43,+	1.49406	0.816449
hsa-miR-16-1-3p	17	61	61	2.99	1.63	13:hsa;hsa-mir-16-1,56,77,-	2.98813	1.6329
hsa-miR-3913-5p	30	61	30.5	2.99	1.63	12:hsa;hsa-mir-3913-1,23,44,-	1.49406	0.816449
hsa-miR-1295a	19	60	60	2.94	1.61	1:hsa;hsa-mir-1295a,49,69,-	2.93914	1.60613
hsa-miR-497-5p	14	60	60	2.94	1.61	17:hsa;hsa-mir-497,24,44,-	2.93914	1.60613
hsa-miR-374c-5p	17	60	31.5	2.94	1.61	X:hsa;hsa-mir-374c,13,34,+	1.54305	0.843218
hsa-miR-766-3p	9	59	59	2.89	1.58	X:hsa;hsa-mir-766,65,86,-	2.89015	1.57936
hsa-miR-505-5p	16	58	58	2.84	1.55	X:hsa;hsa-mir-505,15,36,-	2.84117	1.55259
hsa-let-7c-3p	13	58	57.5	2.84	1.55	21:hsa;hsa-let-7c,56,77,+	2.81668	1.53921
hsa-miR-219a-1-3p	27	58	58	2.84	1.55	6:hsa;hsa-mir-219a-1,62,83,+	2.84117	1.55259
hsa-miR-106a-5p	25	57	28.33	2.79	1.53	X:hsa;hsa-mir-106a,13,35,-	1.38793	0.75845
hsa-miR-2116-3p	17	56	56	2.74	1.5	15:hsa;hsa-mir-2116,51,71,-	2.7432	1.49905
hsa-miR-200a-3p	15	56	56	2.74	1.5	1:hsa;hsa-mir-200a,54,75,+	2.7432	1.49905
hsa-miR-301a-3p	17	55	54.5	2.69	1.47	17:hsa;hsa-mir-301a,51,73,-	2.66972	1.4589
hsa-miR-665	11	55	55	2.69	1.47	14:hsa;hsa-mir-665,43,62,+	2.69421	1.47229
hsa-miR-548e-3p	32	54	54	2.65	1.45	10:hsa;hsa-mir-548e,53,74,+	2.64523	1.44552
hsa-miR-664a-5p	18	54	54	2.65	1.45	1:hsa;hsa-mir-664a,11,34,-	2.64523	1.44552
hsa-miR-335-5p	11	52	52	2.55	1.39	7:hsa;hsa-mir-335,16,38,+	2.54725	1.39198
hsa-miR-3651	11	51	51	2.5	1.37	9:hsa;hsa-mir-3651,64,87,-	2.49827	1.36521
hsa-miR-605-3p	11	50	50	2.45	1.34	10:hsa;hsa-mir-605,51,72,+	2.44928	1.33844
hsa-miR-5699-5p	10	49	49	2.4	1.31	10:hsa;hsa-mir-5699,10,31,-	2.4003	1.31167
hsa-miR-500b-3p	18	49	48.5	2.4	1.31	X:hsa;hsa-mir-500b,51,70,+	2.3758	1.29829
hsa-miR-3074-5p	14	48	48	2.35	1.28	9:hsa;hsa-mir-3074,12,32,-	2.35131	1.2849
hsa-miR-597-3p	26	47	47	2.3	1.26	8:hsa;hsa-mir-597,58,80,+	2.30233	1.25813
hsa-miR-34b-5p	23	46	42	2.25	1.23	11:hsa;hsa-mir-34b,13,35,+	2.0574	1.12429
hsa-miR-3591-5p	12	44	44	2.16	1.18	18:hsa;hsa-mir-3591,10,32,-	2.15537	1.17783
hsa-miR-301b-3p	7	44	43.5	2.16	1.18	22:hsa;hsa-mir-301b,45,67,+	2.13088	1.16444
hsa-miR-99a-3p	12	44	44	2.16	1.18	21:hsa;hsa-mir-99a,50,71,+	2.15537	1.17783
hsa-miR-1262	20	43	43	2.11	1.15	1:hsa;hsa-mir-1262,14,35,-	2.10638	1.15106
hsa-miR-96-5p	8	42	42	2.06	1.12	7:hsa;hsa-mir-96,9,31,-	2.0574	1.12429
hsa-miR-2355-5p	8	42	42	2.06	1.12	2:hsa;hsa-mir-2355,11,31,-	2.0574	1.12429
hsa-miR-550a-3-5p	14	41	32.2	2.01	1.1	7:hsa;hsa-mir-550a-3,21,40,-	1.57734	0.861956
hsa-miR-320c	27	41	17.03	2.01	1.1	18:hsa;hsa-mir-320c-1,50,69,+	0.834467	0.456005
hsa-miR-34a-3p	20	40	40	1.96	1.07	1:hsa;hsa-mir-34a,64,85,-	1.95943	1.07075
hsa-miR-548ay-3p	10	40	40	1.96	1.07	3:hsa;hsa-mir-548ay,64,85,-	1.95943	1.07075
hsa-miR-1270	11	40	40	1.96	1.07	19:hsa;hsa-mir-1270,13,35,-	1.95943	1.07075
hsa-miR-376b-3p	9	39	39	1.91	1.04	14:hsa;hsa-mir-376b,62,83,+	1.91044	1.04398
hsa-miR-210-5p	12	39	39	1.91	1.04	11:hsa;hsa-mir-210,28,49,-	1.91044	1.04398
hsa-miR-628-3p	16	39	39	1.91	1.04	15:hsa;hsa-mir-628,61,81,-	1.91044	1.04398
hsa-miR-541-3p	7	39	39	1.91	1.04	14:hsa;hsa-mir-541,54,75,+	1.91044	1.04398
hsa-miR-3187-3p	21	38	38	1.86	1.02	19:hsa;hsa-mir-3187,44,63,+	1.86146	1.01722
hsa-miR-6130	6	38	18	1.86	1.02	21:hsa;hsa-mir-6130,71,89,+	0.881742	0.481839
hsa-miR-6716-3p	17	38	38	1.86	1.02	11:hsa;hsa-mir-6716,49,70,+	1.86146	1.01722
hsa-miR-363-3p	11	36	36	1.76	0.96	X:hsa;hsa-mir-363,50,71,-	1.76348	0.963678
hsa-miR-4791	9	35	35	1.71	0.94	3:hsa;hsa-mir-4791,8,25,-	1.7145	0.936909
hsa-miR-450a-1-3p	9	35	35	1.71	0.94	X:hsa;hsa-mir-450a-1,53,74,-	1.7145	0.936909
hsa-miR-28-5p	21	35	35	1.71	0.94	3:hsa;hsa-mir-28,14,35,+	1.7145	0.936909
hsa-miR-3200-3p	10	34	34	1.67	0.91	22:hsa;hsa-mir-3200,54,75,+	1.66551	0.91014
hsa-miR-6866-5p	14	34	34	1.67	0.91	17:hsa;hsa-mir-6866,6,28,+	1.66551	0.91014
hsa-miR-582-5p	8	34	34	1.67	0.91	5:hsa;hsa-mir-582,16,38,-	1.66551	0.91014
hsa-miR-3609	24	34	34	1.67	0.91	7:hsa;hsa-mir-3609,51,74,+	1.66551	0.91014
hsa-miR-6852-5p	12	33	33	1.62	0.88	9:hsa;hsa-mir-6852,6,26,-	1.61653	0.883371
hsa-miR-139-5p	12	33	33	1.62	0.88	11:hsa;hsa-mir-139,7,29,-	1.61653	0.883371
hsa-miR-142-3p	11	33	33	1.62	0.88	17:hsa;hsa-mir-142,52,74,-	1.61653	0.883371
hsa-miR-5001-3p	14	33	33	1.62	0.88	2:hsa;hsa-mir-5001,60,81,-	1.61653	0.883371
hsa-miR-122-5p	9	32	32	1.57	0.86	18:hsa;hsa-mir-122,15,36,+	1.56754	0.856602
hsa-miR-3662	8	31	31	1.52	0.83	6:hsa;hsa-mir-3662,55,78,-	1.51856	0.829834
hsa-miR-196b-3p	9	31	31	1.52	0.83	7:hsa;hsa-mir-196b,50,71,-	1.51856	0.829834
hsa-miR-4474-3p	16	31	31	1.52	0.83	9:hsa;hsa-mir-4474,45,66,-	1.51856	0.829834
hsa-let-7g-3p	12	31	31	1.52	0.83	3:hsa;hsa-let-7g,62,82,-	1.51856	0.829834
hsa-miR-203a-3p	17	30	30	1.47	0.8	14:hsa;hsa-mir-203a,65,86,+	1.46957	0.803065
hsa-miR-153-3p	8	30	15	1.47	0.8	7:hsa;hsa-mir-153-2,53,74,-	0.734785	0.401532
hsa-miR-494-5p	17	30	30	1.47	0.8	14:hsa;hsa-mir-494,15,37,+	1.46957	0.803065
hsa-miR-92a-1-5p	11	30	30	1.47	0.8	13:hsa;hsa-mir-92a-1,11,33,+	1.46957	0.803065
hsa-miR-153-3p	8	30	15	1.47	0.8	2:hsa;hsa-mir-153-1,54,75,-	0.734785	0.401532
hsa-miR-346	11	30	30	1.47	0.8	10:hsa;hsa-mir-346,20,42,-	1.46957	0.803065
hsa-miR-550a-3p	11	29	9.67	1.42	0.78	7:hsa;hsa-mir-550a-3,60,81,-	0.473528	0.258765
hsa-miR-487b-5p	15	29	29	1.42	0.78	14:hsa;hsa-mir-487b,15,36,+	1.42058	0.776296
hsa-miR-550a-3p	11	29	9.67	1.42	0.78	7:hsa;hsa-mir-550a-1,61,82,+	0.473528	0.258765
hsa-miR-550a-3p	11	29	9.67	1.42	0.78	7:hsa;hsa-mir-550a-2,61,82,+	0.473528	0.258765
hsa-miR-3179	11	28	1.75	1.37	0.75	16:hsa;hsa-mir-3179-3,52,73,+	0.0857249	0.0468454
hsa-miR-4470	12	28	28	1.37	0.75	8:hsa;hsa-mir-4470,45,65,+	1.3716	0.749527
hsa-miR-3179	11	28	1.75	1.37	0.75	16:hsa;hsa-mir-3179-4,52,73,-	0.0857249	0.0468454
hsa-miR-3179	11	28	1.75	1.37	0.75	16:hsa;hsa-mir-3179-4,52,73,+	0.0857249	0.0468454
hsa-miR-3179	11	28	1.75	1.37	0.75	16:hsa;hsa-mir-3179-4,52,73,+	0.0857249	0.0468454
hsa-miR-3179	11	28	1.75	1.37	0.75	16:hsa;hsa-mir-3179-2,52,73,-	0.0857249	0.0468454
hsa-miR-3179	11	28	1.75	1.37	0.75	16:hsa;hsa-mir-3179-2,52,73,+	0.0857249	0.0468454
hsa-miR-3179	11	28	1.75	1.37	0.75	16:hsa;hsa-mir-3179-1,52,73,-	0.0857249	0.0468454
hsa-miR-3179	11	28	1.75	1.37	0.75	16:hsa;hsa-mir-3179-3,52,73,+	0.0857249	0.0468454
hsa-miR-3179	11	28	1.75	1.37	0.75	16:hsa;hsa-mir-3179-2,52,73,+	0.0857249	0.0468454
hsa-miR-3179	11	28	1.75	1.37	0.75	16:hsa;hsa-mir-3179-4,52,73,-	0.0857249	0.0468454
hsa-miR-3179	11	28	1.75	1.37	0.75	16:hsa;hsa-mir-3179-2,52,73,-	0.0857249	0.0468454
hsa-miR-3179	11	28	1.75	1.37	0.75	16:hsa;hsa-mir-3179-1,52,73,+	0.0857249	0.0468454
hsa-miR-3179	11	28	1.75	1.37	0.75	16:hsa;hsa-mir-3179-1,52,73,+	0.0857249	0.0468454
hsa-miR-3179	11	28	1.75	1.37	0.75	16:hsa;hsa-mir-3179-3,52,73,-	0.0857249	0.0468454
hsa-miR-3179	11	28	1.75	1.37	0.75	16:hsa;hsa-mir-3179-3,52,73,-	0.0857249	0.0468454
hsa-miR-581	12	28	28	1.37	0.75	5:hsa;hsa-mir-581,16,36,-	1.3716	0.749527
hsa-miR-3179	11	28	1.75	1.37	0.75	16:hsa;hsa-mir-3179-1,52,73,-	0.0857249	0.0468454
hsa-miR-5000-5p	6	27	27	1.32	0.72	2:hsa;hsa-mir-5000,24,45,+	1.32261	0.722758
hsa-miR-4676-3p	16	27	27	1.32	0.72	10:hsa;hsa-mir-4676,44,65,+	1.32261	0.722758
hsa-miR-1910-5p	16	27	27	1.32	0.72	16:hsa;hsa-mir-1910,12,32,-	1.32261	0.722758
hsa-miR-580-3p	12	27	27	1.32	0.72	5:hsa;hsa-mir-580,61,82,-	1.32261	0.722758
hsa-miR-3148	15	26	26	1.27	0.7	8:hsa;hsa-mir-3148,10,31,-	1.27363	0.695989
hsa-miR-3691-5p	21	26	26	1.27	0.7	6:hsa;hsa-mir-3691,15,37,-	1.27363	0.695989
hsa-miR-320c	17	26	6.87	1.27	0.7	18:hsa;hsa-mir-320c-2,31,50,+	0.336446	0.183855
hsa-miR-612	20	25	25	1.22	0.67	11:hsa;hsa-mir-612,16,40,+	1.22464	0.669221
hsa-miR-6723-5p	14	25	25	1.22	0.67	1:hsa;hsa-mir-6723,11,32,-	1.22464	0.669221
hsa-miR-4659a-3p	11	25	25	1.22	0.67	8:hsa;hsa-mir-4659a,49,70,+	1.22464	0.669221
hsa-miR-3605-5p	17	24	24	1.18	0.64	1:hsa;hsa-mir-3605,22,44,-	1.17566	0.642452
hsa-miR-1185-5p	11	24	12	1.18	0.64	14:hsa;hsa-mir-1185-2,15,35,+	0.587828	0.321226
hsa-miR-1538	11	24	24	1.18	0.64	16:hsa;hsa-mir-1538,39,61,-	1.17566	0.642452
hsa-miR-33b-3p	13	24	24	1.18	0.64	17:hsa;hsa-mir-33b,54,75,-	1.17566	0.642452
hsa-miR-1185-5p	11	24	12	1.18	0.64	14:hsa;hsa-mir-1185-1,15,35,+	0.587828	0.321226
hsa-miR-3944-3p	13	24	24	1.18	0.64	10:hsa;hsa-mir-3944,63,85,-	1.17566	0.642452
hsa-miR-629-3p	18	23	23	1.13	0.62	15:hsa;hsa-mir-629,61,82,-	1.12667	0.615683
hsa-miR-3180-3p	14	23	1.8	1.13	0.62	16:hsa;hsa-mir-3180-3,62,83,+	0.0880372	0.048109
hsa-miR-3180-3p	14	23	1.8	1.13	0.62	16:hsa;hsa-mir-3180-1,62,83,-	0.0880372	0.048109
hsa-miR-135b-5p	5	23	23	1.13	0.62	1:hsa;hsa-mir-135b,16,38,-	1.12667	0.615683
hsa-miR-100-3p	9	23	23	1.13	0.62	11:hsa;hsa-mir-100,48,69,-	1.12667	0.615683
hsa-miR-624-5p	7	23	23	1.13	0.62	14:hsa;hsa-mir-624,16,37,-	1.12667	0.615683
hsa-miR-3180-3p	14	23	1.8	1.13	0.62	16:hsa;hsa-mir-3180-2,58,79,-	0.0880372	0.048109
hsa-miR-3180-3p	14	23	1.8	1.13	0.62	16:hsa;hsa-mir-3180-3,62,83,-	0.0880372	0.048109
hsa-miR-4661-5p	9	23	23	1.13	0.62	8:hsa;hsa-mir-4661,10,31,+	1.12667	0.615683
hsa-miR-3180-3p	14	23	1.8	1.13	0.62	16:hsa;hsa-mir-3180-4,36,57,-	0.0880372	0.048109
hsa-miR-142-5p	12	23	23	1.13	0.62	17:hsa;hsa-mir-142,16,36,-	1.12667	0.615683
hsa-miR-548o-3p	11	23	11.5	1.13	0.62	7:hsa;hsa-mir-548o,87,108,-	0.563335	0.307841
hsa-miR-3180-3p	14	23	1.8	1.13	0.62	16:hsa;hsa-mir-3180-2,58,79,+	0.0880372	0.048109
hsa-miR-3180-3p	14	23	1.8	1.13	0.62	16:hsa;hsa-mir-3180-3,62,83,+	0.0880372	0.048109
hsa-miR-3180-3p	14	23	1.8	1.13	0.62	16:hsa;hsa-mir-3180-1,62,83,+	0.0880372	0.048109
hsa-miR-3180-3p	14	23	1.8	1.13	0.62	16:hsa;hsa-mir-3180-2,58,79,+	0.0880372	0.048109
hsa-miR-3180-3p	14	23	1.8	1.13	0.62	16:hsa;hsa-mir-3180-5,36,57,-	0.0880372	0.048109
hsa-miR-548o-3p	11	23	11.5	1.13	0.62	20:hsa;hsa-mir-548o-2,45,66,+	0.563335	0.307841
hsa-miR-3180-3p	14	23	1.8	1.13	0.62	16:hsa;hsa-mir-3180-1,62,83,+	0.0880372	0.048109
hsa-miR-5000-3p	9	22	22	1.08	0.59	2:hsa;hsa-mir-5000,62,83,+	1.07768	0.588914
hsa-miR-329-5p	9	22	11	1.08	0.59	14:hsa;hsa-mir-329-1,13,35,+	0.538842	0.294457
hsa-miR-5582-3p	12	22	22	1.08	0.59	11:hsa;hsa-mir-5582,47,68,-	1.07768	0.588914
hsa-miR-491-5p	9	22	22	1.08	0.59	9:hsa;hsa-mir-491,16,37,+	1.07768	0.588914
hsa-miR-329-5p	9	22	11	1.08	0.59	14:hsa;hsa-mir-329-2,15,37,+	0.538842	0.294457
hsa-miR-483-3p	12	22	22	1.08	0.59	11:hsa;hsa-mir-483,48,68,-	1.07768	0.588914
hsa-miR-597-5p	6	21	21	1.03	0.56	8:hsa;hsa-mir-597,16,37,+	1.0287	0.562145
hsa-miR-3180	12	21	1.62	1.03	0.56	16:hsa;hsa-mir-3180-4,36,54,-	0.0791307	0.0432419
hsa-miR-4785	10	21	21	1.03	0.56	2:hsa;hsa-mir-4785,44,64,-	1.0287	0.562145
hsa-miR-3128	12	21	21	1.03	0.56	2:hsa;hsa-mir-3128,5,27,-	1.0287	0.562145
hsa-miR-652-5p	12	21	21	1.03	0.56	X:hsa;hsa-mir-652,21,45,+	1.0287	0.562145
hsa-miR-3180	12	21	1.62	1.03	0.56	16:hsa;hsa-mir-3180-5,36,54,-	0.0791307	0.0432419
hsa-miR-933	10	21	21	1.03	0.56	2:hsa;hsa-mir-933,47,68,-	1.0287	0.562145
hsa-miR-3170	8	21	21	1.03	0.56	13:hsa;hsa-mir-3170,10,31,+	1.0287	0.562145
hsa-miR-3154	14	21	21	1.03	0.56	9:hsa;hsa-mir-3154,54,75,-	1.0287	0.562145
hsa-miR-548k	13	21	21	1.03	0.56	11:hsa;hsa-mir-548k,32,53,+	1.0287	0.562145
hsa-miR-5699-3p	10	20	20	0.98	0.54	10:hsa;hsa-mir-5699,59,80,-	0.979713	0.535376
hsa-miR-33a-3p	6	20	20	0.98	0.54	22:hsa;hsa-mir-33a,46,67,+	0.979713	0.535376
hsa-miR-3174	12	20	20	0.98	0.54	15:hsa;hsa-mir-3174,10,32,+	0.979713	0.535376
hsa-miR-3677-5p	8	20	20	0.98	0.54	16:hsa;hsa-mir-3677,3,24,+	0.979713	0.535376
hsa-miR-3677-3p	7	20	20	0.98	0.54	16:hsa;hsa-mir-3677,39,60,+	0.979713	0.535376
hsa-miR-4796-5p	10	20	20	0.98	0.54	3:hsa;hsa-mir-4796,9,30,-	0.979713	0.535376
hsa-miR-1245b-3p	14	19	19	0.93	0.51	2:hsa;hsa-mir-1245b,42,63,-	0.930728	0.508608
hsa-miR-502-5p	15	19	19	0.93	0.51	X:hsa;hsa-mir-502,16,36,+	0.930728	0.508608
hsa-miR-4725-3p	11	19	19	0.93	0.51	17:hsa;hsa-mir-4725,58,79,+	0.930728	0.508608
hsa-miR-6827-5p	7	19	19	0.93	0.51	3:hsa;hsa-mir-6827,6,27,-	0.930728	0.508608
hsa-miR-134-3p	11	19	19	0.93	0.51	14:hsa;hsa-mir-134,46,68,+	0.930728	0.508608
hsa-miR-6516-5p	9	19	19	0.93	0.51	17:hsa;hsa-mir-6516,12,33,+	0.930728	0.508608
hsa-miR-6516-3p	11	19	19	0.93	0.51	17:hsa;hsa-mir-6516,53,74,+	0.930728	0.508608
hsa-miR-4787-3p	9	18	18	0.88	0.48	3:hsa;hsa-mir-4787,51,74,+	0.881742	0.481839
hsa-miR-6513-3p	7	18	18	0.88	0.48	2:hsa;hsa-mir-6513,42,62,-	0.881742	0.481839
hsa-miR-3138	11	18	18	0.88	0.48	4:hsa;hsa-mir-3138,48,71,-	0.881742	0.481839
hsa-miR-194-3p	9	18	18	0.88	0.48	11:hsa;hsa-mir-194-2,51,72,-	0.881742	0.481839
hsa-miR-3173-5p	6	18	18	0.88	0.48	14:hsa;hsa-mir-3173,5,26,-	0.881742	0.481839
hsa-miR-4435	11	18	4.5	0.88	0.48	2:hsa;hsa-mir-4435-1,10,31,-	0.220435	0.12046
hsa-miR-4435	11	18	4.5	0.88	0.48	2:hsa;hsa-mir-4435-2,5,26,-	0.220435	0.12046
hsa-miR-488-3p	6	18	18	0.88	0.48	1:hsa;hsa-mir-488,52,72,-	0.881742	0.481839
hsa-miR-664b-3p	6	18	18	0.88	0.48	X:hsa;hsa-mir-664b,40,61,+	0.881742	0.481839
hsa-miR-4435	11	18	4.5	0.88	0.48	2:hsa;hsa-mir-4435-1,10,31,+	0.220435	0.12046
hsa-miR-4677-5p	8	18	18	0.88	0.48	1:hsa;hsa-mir-4677,13,34,+	0.881742	0.481839
hsa-miR-943	12	18	18	0.88	0.48	4:hsa;hsa-mir-943,55,75,-	0.881742	0.481839
hsa-miR-4435	11	18	4.5	0.88	0.48	2:hsa;hsa-mir-4435-2,5,26,+	0.220435	0.12046
hsa-miR-323a-5p	8	18	18	0.88	0.48	14:hsa;hsa-mir-323a,16,37,+	0.881742	0.481839
hsa-miR-4497	12	17	17	0.83	0.46	12:hsa;hsa-mir-4497,3,19,+	0.832756	0.45507
hsa-miR-660-3p	5	17	17	0.83	0.46	X:hsa;hsa-mir-660,52,72,+	0.832756	0.45507
hsa-miR-449c-5p	9	17	17	0.83	0.46	5:hsa;hsa-mir-449c,17,41,-	0.832756	0.45507
hsa-miR-4423-5p	7	17	17	0.83	0.46	1:hsa;hsa-mir-4423,13,34,+	0.832756	0.45507
hsa-miR-542-5p	6	17	17	0.83	0.46	X:hsa;hsa-mir-542,16,38,-	0.832756	0.45507
hsa-miR-324-3p	16	17	17	0.83	0.46	17:hsa;hsa-mir-324,53,72,-	0.832756	0.45507
hsa-miR-1909-3p	10	17	17	0.83	0.46	19:hsa;hsa-mir-1909,49,70,-	0.832756	0.45507
hsa-miR-219a-5p	7	17	16	0.83	0.46	6:hsa;hsa-mir-219a-1,21,41,+	0.783771	0.428301
hsa-miR-6877-5p	11	17	17	0.83	0.46	9:hsa;hsa-mir-6877,6,27,+	0.832756	0.45507
hsa-miR-2277-3p	10	16	16	0.78	0.43	5:hsa;hsa-mir-2277,59,79,-	0.783771	0.428301
hsa-miR-1275	5	16	16	0.78	0.43	6:hsa;hsa-mir-1275,18,34,-	0.783771	0.428301
hsa-miR-6515-5p	8	16	16	0.78	0.43	19:hsa;hsa-mir-6515,3,23,+	0.783771	0.428301
hsa-miR-590-3p	14	16	16	0.78	0.43	7:hsa;hsa-mir-590,56,76,+	0.783771	0.428301
hsa-miR-181b-2-3p	9	16	16	0.78	0.43	9:hsa;hsa-mir-181b-2,54,73,+	0.783771	0.428301
hsa-miR-3150a-5p	6	15	15	0.73	0.4	8:hsa;hsa-mir-3150a,12,33,+	0.734785	0.401532
hsa-miR-4683	6	15	15	0.73	0.4	10:hsa;hsa-mir-4683,50,72,-	0.734785	0.401532
hsa-miR-642a-3p	8	15	14.5	0.73	0.4	19:hsa;hsa-mir-642a,51,72,+	0.710292	0.388148
hsa-miR-1276	5	15	15	0.73	0.4	15:hsa;hsa-mir-1276,12,31,-	0.734785	0.401532
hsa-miR-6733-5p	11	15	15	0.73	0.4	1:hsa;hsa-mir-6733,6,27,-	0.734785	0.401532
hsa-miR-1298-5p	5	15	15	0.73	0.4	X:hsa;hsa-mir-1298,18,39,+	0.734785	0.401532
hsa-miR-4485-5p	11	15	15	0.73	0.4	11:hsa;hsa-mir-4485,7,22,-	0.734785	0.401532
hsa-miR-219b-5p	7	15	15	0.73	0.4	9:hsa;hsa-mir-219b,14,35,+	0.734785	0.401532
hsa-miR-184	7	15	15	0.73	0.4	15:hsa;hsa-mir-184,53,74,+	0.734785	0.401532
hsa-miR-3190-3p	8	14	14	0.69	0.37	19:hsa;hsa-mir-3190,47,69,+	0.685799	0.374764
hsa-miR-4709-5p	12	14	14	0.69	0.37	14:hsa;hsa-mir-4709,9,30,-	0.685799	0.374764
hsa-miR-4684-3p	6	14	14	0.69	0.37	1:hsa;hsa-mir-4684,50,71,+	0.685799	0.374764
hsa-miR-429	5	14	14	0.69	0.37	1:hsa;hsa-mir-429,51,72,+	0.685799	0.374764
hsa-miR-708-5p	12	14	14	0.69	0.37	11:hsa;hsa-mir-708,11,33,-	0.685799	0.374764
hsa-miR-146a-3p	6	14	14	0.69	0.37	5:hsa;hsa-mir-146a,57,78,+	0.685799	0.374764
hsa-miR-4741	12	14	14	0.69	0.37	18:hsa;hsa-mir-4741,59,81,+	0.685799	0.374764
hsa-miR-302a-5p	7	14	14	0.69	0.37	4:hsa;hsa-mir-302a,6,28,-	0.685799	0.374764
hsa-miR-1228-5p	7	14	14	0.69	0.37	12:hsa;hsa-mir-1228,1,21,+	0.685799	0.374764
hsa-miR-488-5p	3	14	14	0.69	0.37	1:hsa;hsa-mir-488,14,34,-	0.685799	0.374764
hsa-miR-503-3p	11	14	14	0.69	0.37	X:hsa;hsa-mir-503,46,68,-	0.685799	0.374764
hsa-miR-573	6	14	14	0.69	0.37	4:hsa;hsa-mir-573,16,39,-	0.685799	0.374764
hsa-miR-3064-5p	7	13	13	0.64	0.35	17:hsa;hsa-mir-3064,3,23,-	0.636814	0.347995
hsa-miR-618	11	13	13	0.64	0.35	12:hsa;hsa-mir-618,16,38,-	0.636814	0.347995
hsa-miR-6720-5p	8	13	13	0.64	0.35	6:hsa;hsa-mir-6720,31,53,-	0.636814	0.347995
hsa-miR-1245b-5p	10	13	13	0.64	0.35	2:hsa;hsa-mir-1245b,9,29,-	0.636814	0.347995
hsa-miR-4664-3p	8	13	13	0.64	0.35	8:hsa;hsa-mir-4664,44,65,-	0.636814	0.347995
hsa-miR-218-1-3p	8	13	13	0.64	0.35	4:hsa;hsa-mir-218-1,68,89,+	0.636814	0.347995
hsa-miR-3940-5p	5	13	13	0.64	0.35	19:hsa;hsa-mir-3940,23,42,-	0.636814	0.347995
hsa-miR-3688-3p	7	13	7	0.64	0.35	4:hsa;hsa-mir-3688-1,60,81,-	0.3429	0.187382
hsa-miR-1228-3p	7	13	13	0.64	0.35	12:hsa;hsa-mir-1228,52,71,+	0.636814	0.347995
hsa-miR-3130-5p	8	13	9	0.64	0.35	2:hsa;hsa-mir-3130-2,13,33,+	0.440871	0.240919
hsa-miR-3614-5p	11	13	13	0.64	0.35	17:hsa;hsa-mir-3614,15,37,-	0.636814	0.347995
hsa-miR-579-3p	5	13	13	0.64	0.35	5:hsa;hsa-mir-579,62,84,-	0.636814	0.347995
hsa-miR-23c	11	13	9.83	0.64	0.35	X:hsa;hsa-mir-23c,66,87,-	0.481692	0.263227
hsa-miR-3622a-5p	7	13	13	0.64	0.35	8:hsa;hsa-mir-3622a,14,35,+	0.636814	0.347995
hsa-miR-556-5p	3	13	13	0.64	0.35	1:hsa;hsa-mir-556,16,37,+	0.636814	0.347995
hsa-miR-541-5p	9	13	13	0.64	0.35	14:hsa;hsa-mir-541,10,34,+	0.636814	0.347995
hsa-miR-4517	6	12	12	0.59	0.32	16:hsa;hsa-mir-4517,5,29,+	0.587828	0.321226
hsa-miR-3157-5p	9	12	12	0.59	0.32	10:hsa;hsa-mir-3157,10,31,-	0.587828	0.321226
hsa-miR-3065-5p	7	12	12	0.59	0.32	17:hsa;hsa-mir-3065,10,32,+	0.587828	0.321226
hsa-miR-3688-3p	6	12	6	0.59	0.32	4:hsa;hsa-mir-3688-2,57,78,+	0.293914	0.160613
hsa-miR-605-5p	6	12	12	0.59	0.32	10:hsa;hsa-mir-605,16,38,+	0.587828	0.321226
hsa-miR-548al	8	12	12	0.59	0.32	11:hsa;hsa-mir-548al,65,86,+	0.587828	0.321226
hsa-miR-375	7	12	12	0.59	0.32	2:hsa;hsa-mir-375,40,61,-	0.587828	0.321226
hsa-miR-1287-3p	3	12	12	0.59	0.32	10:hsa;hsa-mir-1287,55,76,-	0.587828	0.321226
hsa-miR-449a	6	12	12	0.59	0.32	5:hsa;hsa-mir-449a,16,37,-	0.587828	0.321226
hsa-miR-6842-3p	3	12	12	0.59	0.32	8:hsa;hsa-mir-6842,44,65,+	0.587828	0.321226
hsa-miR-3653-3p	9	12	12	0.59	0.32	22:hsa;hsa-mir-3653,75,92,-	0.587828	0.321226
hsa-miR-6505-5p	5	12	12	0.59	0.32	12:hsa;hsa-mir-6505,4,25,+	0.587828	0.321226
hsa-miR-103a-2-5p	9	12	12	0.59	0.32	20:hsa;hsa-mir-103a-2,11,33,+	0.587828	0.321226
hsa-miR-577	7	12	12	0.59	0.32	4:hsa;hsa-mir-577,16,36,+	0.587828	0.321226
hsa-miR-500a-5p	12	12	11	0.59	0.32	X:hsa;hsa-mir-500a,13,35,+	0.538842	0.294457
hsa-miR-151a-5p	7	12	10	0.59	0.32	8:hsa;hsa-mir-151a,11,31,-	0.489857	0.267688
hsa-miR-6514-5p	10	11	11	0.54	0.29	11:hsa;hsa-mir-6514,1,23,-	0.538842	0.294457
hsa-miR-3157-3p	8	11	11	0.54	0.29	10:hsa;hsa-mir-3157,58,79,-	0.538842	0.294457
hsa-miR-4717-3p	8	11	11	0.54	0.29	16:hsa;hsa-mir-4717,42,62,+	0.538842	0.294457
hsa-miR-942-3p	4	11	11	0.54	0.29	1:hsa;hsa-mir-942,53,74,+	0.538842	0.294457
hsa-miR-133a-3p	6	11	5.5	0.54	0.29	18:hsa;hsa-mir-133a-1,53,74,-	0.269421	0.147229
hsa-miR-20a-3p	7	11	11	0.54	0.29	13:hsa;hsa-mir-20a,44,65,+	0.538842	0.294457
hsa-miR-133a-3p	6	11	5.5	0.54	0.29	20:hsa;hsa-mir-133a-2,59,80,+	0.269421	0.147229
hsa-miR-3152-5p	7	11	11	0.54	0.29	9:hsa;hsa-mir-3152,11,32,+	0.538842	0.294457
hsa-miR-3199	7	11	5.5	0.54	0.29	22:hsa;hsa-mir-3199-2,10,32,+	0.269421	0.147229
hsa-miR-381-5p	6	11	11	0.54	0.29	14:hsa;hsa-mir-381,8,29,+	0.538842	0.294457
hsa-miR-4999-5p	8	11	11	0.54	0.29	19:hsa;hsa-mir-4999,21,41,-	0.538842	0.294457
hsa-miR-3184-5p	4	11	11	0.54	0.29	17:hsa;hsa-mir-3184,10,33,-	0.538842	0.294457
hsa-miR-643	7	11	11	0.54	0.29	19:hsa;hsa-mir-643,61,82,+	0.538842	0.294457
hsa-miR-3199	7	11	5.5	0.54	0.29	22:hsa;hsa-mir-3199-1,10,32,-	0.269421	0.147229
hsa-miR-9-3p	4	10	3.33	0.49	0.27	5:hsa;hsa-mir-9-2,53,74,-	0.163286	0.0892294
hsa-miR-9-3p	4	10	3.33	0.49	0.27	1:hsa;hsa-mir-9-1,55,76,-	0.163286	0.0892294
hsa-miR-576-5p	7	10	10	0.49	0.27	4:hsa;hsa-mir-576,16,37,+	0.489857	0.267688
hsa-miR-4638-5p	6	10	10	0.49	0.27	5:hsa;hsa-mir-4638,2,22,-	0.489857	0.267688
hsa-miR-190b	6	10	10	0.49	0.27	1:hsa;hsa-mir-190b,11,31,-	0.489857	0.267688
hsa-miR-642a-5p	4	10	10	0.49	0.27	19:hsa;hsa-mir-642a,16,37,+	0.489857	0.267688
hsa-miR-3653-5p	8	10	10	0.49	0.27	22:hsa;hsa-mir-3653,23,42,-	0.489857	0.267688
hsa-miR-4761-3p	6	10	10	0.49	0.27	22:hsa;hsa-mir-4761,62,82,+	0.489857	0.267688
hsa-miR-4423-3p	6	10	10	0.49	0.27	1:hsa;hsa-mir-4423,49,69,+	0.489857	0.267688
hsa-miR-200a-5p	4	10	10	0.49	0.27	1:hsa;hsa-mir-200a,16,37,+	0.489857	0.267688
hsa-miR-522-3p	6	10	10	0.49	0.27	19:hsa;hsa-mir-522,54,75,+	0.489857	0.267688
hsa-miR-491-3p	7	10	10	0.49	0.27	9:hsa;hsa-mir-491,50,71,+	0.489857	0.267688
hsa-miR-378a-5p	9	10	10	0.49	0.27	5:hsa;hsa-mir-378a,5,26,+	0.489857	0.267688
hsa-miR-9-3p	4	10	3.33	0.49	0.27	15:hsa;hsa-mir-9-3,55,76,+	0.163286	0.0892294
hsa-miR-610	4	10	10	0.49	0.27	11:hsa;hsa-mir-610,16,36,+	0.489857	0.267688
hsa-miR-4645-3p	8	10	10	0.49	0.27	6:hsa;hsa-mir-4645,47,68,-	0.489857	0.267688
hsa-miR-4665-5p	6	10	10	0.49	0.27	9:hsa;hsa-mir-4665,10,32,+	0.489857	0.267688
hsa-miR-197-5p	8	10	10	0.49	0.27	1:hsa;hsa-mir-197,9,31,+	0.489857	0.267688
hsa-miR-495-5p	4	9	9	0.44	0.24	14:hsa;hsa-mir-495,14,35,+	0.440871	0.240919
hsa-miR-6755-5p	8	9	9	0.44	0.24	11:hsa;hsa-mir-6755,6,27,+	0.440871	0.240919
hsa-miR-4638-3p	9	9	9	0.44	0.24	5:hsa;hsa-mir-4638,35,57,-	0.440871	0.240919
hsa-miR-4762-3p	6	9	9	0.44	0.24	22:hsa;hsa-mir-4762,49,70,+	0.440871	0.240919
hsa-miR-4284	4	9	9	0.44	0.24	7:hsa;hsa-mir-4284,11,28,+	0.440871	0.240919
hsa-miR-1193	7	9	9	0.44	0.24	14:hsa;hsa-mir-1193,10,32,+	0.440871	0.240919
hsa-miR-6840-5p	8	9	9	0.44	0.24	7:hsa;hsa-mir-6840,6,29,+	0.440871	0.240919
hsa-miR-4726-5p	3	9	9	0.44	0.24	17:hsa;hsa-mir-4726,1,23,+	0.440871	0.240919
hsa-miR-376a-2-5p	7	9	9	0.44	0.24	14:hsa;hsa-mir-376a-2,12,32,+	0.440871	0.240919
hsa-miR-4725-5p	8	9	9	0.44	0.24	17:hsa;hsa-mir-4725,13,33,+	0.440871	0.240919
hsa-miR-708-3p	7	9	9	0.44	0.24	11:hsa;hsa-mir-708,57,78,-	0.440871	0.240919
hsa-miR-889-5p	5	9	9	0.44	0.24	14:hsa;hsa-mir-889,11,32,+	0.440871	0.240919
hsa-miR-1304-5p	8	9	9	0.44	0.24	11:hsa;hsa-mir-1304,20,41,-	0.440871	0.240919
hsa-miR-1226-5p	7	9	9	0.44	0.24	3:hsa;hsa-mir-1226,1,26,+	0.440871	0.240919
hsa-miR-3130-5p	6	9	5	0.44	0.24	2:hsa;hsa-mir-3130-1,13,33,-	0.244928	0.133844
hsa-miR-5001-5p	5	9	9	0.44	0.24	2:hsa;hsa-mir-5001,21,44,-	0.440871	0.240919
hsa-miR-4455	1	9	9	0.44	0.24	4:hsa;hsa-mir-4455,4,20,-	0.440871	0.240919
hsa-miR-362-3p	4	9	9	0.44	0.24	X:hsa;hsa-mir-362,42,63,+	0.440871	0.240919
hsa-miR-939-5p	7	9	9	0.44	0.24	8:hsa;hsa-mir-939,15,38,-	0.440871	0.240919
hsa-miR-4750-5p	4	9	9	0.44	0.24	19:hsa;hsa-mir-4750,3,24,+	0.440871	0.240919
hsa-miR-6881-3p	6	9	9	0.44	0.24	15:hsa;hsa-mir-6881,51,72,-	0.440871	0.240919
hsa-miR-3140-3p	5	9	9	0.44	0.24	4:hsa;hsa-mir-3140,60,81,-	0.440871	0.240919
hsa-miR-3942-5p	4	8	8	0.39	0.21	15:hsa;hsa-mir-3942,23,44,-	0.391885	0.214151
hsa-miR-3613-5p	2	8	8	0.39	0.21	13:hsa;hsa-mir-3613,16,37,-	0.391885	0.214151
hsa-miR-627-5p	6	8	8	0.39	0.21	15:hsa;hsa-mir-627,16,37,-	0.391885	0.214151
hsa-miR-6507-5p	8	8	8	0.39	0.21	10:hsa;hsa-mir-6507,6,26,-	0.391885	0.214151
hsa-miR-4709-3p	6	8	8	0.39	0.21	14:hsa;hsa-mir-4709,48,70,-	0.391885	0.214151
hsa-miR-6815-5p	5	8	8	0.39	0.21	21:hsa;hsa-mir-6815,6,28,+	0.391885	0.214151
hsa-miR-4443	6	8	8	0.39	0.21	3:hsa;hsa-mir-4443,9,25,+	0.391885	0.214151
hsa-miR-10b-3p	5	8	8	0.39	0.21	2:hsa;hsa-mir-10b,66,87,+	0.391885	0.214151
hsa-miR-4781-3p	7	8	8	0.39	0.21	1:hsa;hsa-mir-4781,46,67,+	0.391885	0.214151
hsa-miR-4426	8	8	8	0.39	0.21	1:hsa;hsa-mir-4426,6,22,+	0.391885	0.214151
hsa-miR-6854-5p	4	8	8	0.39	0.21	9:hsa;hsa-mir-6854,6,29,-	0.391885	0.214151
hsa-miR-4755-5p	4	8	8	0.39	0.21	20:hsa;hsa-mir-4755,10,31,+	0.391885	0.214151
hsa-miR-766-5p	4	8	8	0.39	0.21	X:hsa;hsa-mir-766,29,50,-	0.391885	0.214151
hsa-miR-4731-5p	6	8	8	0.39	0.21	17:hsa;hsa-mir-4731,10,31,-	0.391885	0.214151
hsa-miR-3935	7	8	8	0.39	0.21	16:hsa;hsa-mir-3935,58,79,+	0.391885	0.214151
hsa-miR-19b-1-5p	5	8	8	0.39	0.21	13:hsa;hsa-mir-19b-1,16,38,+	0.391885	0.214151
hsa-miR-6882-5p	6	8	8	0.39	0.21	15:hsa;hsa-mir-6882,6,27,-	0.391885	0.214151
hsa-miR-1973	7	8	8	0.39	0.21	4:hsa;hsa-mir-1973,26,44,+	0.391885	0.214151
hsa-miR-4660	5	8	8	0.39	0.21	8:hsa;hsa-mir-4660,9,31,+	0.391885	0.214151
hsa-miR-190a-5p	8	8	8	0.39	0.21	15:hsa;hsa-mir-190a,15,36,+	0.391885	0.214151
hsa-miR-6811-5p	4	7	7	0.34	0.19	2:hsa;hsa-mir-6811,2,23,+	0.3429	0.187382
hsa-miR-372-3p	3	7	7	0.34	0.19	19:hsa;hsa-mir-372,42,64,+	0.3429	0.187382
hsa-miR-3155a	3	7	7	0.34	0.19	10:hsa;hsa-mir-3155a,52,72,+	0.3429	0.187382
hsa-miR-301b-5p	6	7	7	0.34	0.19	22:hsa;hsa-mir-301b,10,31,+	0.3429	0.187382
hsa-miR-320d	2	7	0.97	0.34	0.19	X:hsa;hsa-mir-320d-2,30,48,-	0.0474306	0.025919
hsa-miR-18b-5p	5	7	3.5	0.34	0.19	X:hsa;hsa-mir-18b,6,28,-	0.17145	0.0936909
hsa-miR-3181	6	7	7	0.34	0.19	16:hsa;hsa-mir-3181,9,27,+	0.3429	0.187382
hsa-miR-1234-3p	7	7	7	0.34	0.19	8:hsa;hsa-mir-1234,57,78,-	0.3429	0.187382
hsa-miR-5094	6	7	7	0.34	0.19	15:hsa;hsa-mir-5094,11,32,-	0.3429	0.187382
hsa-miR-4743-5p	6	7	7	0.34	0.19	18:hsa;hsa-mir-4743,3,25,+	0.3429	0.187382
hsa-miR-26a-1-3p	4	7	6.5	0.34	0.19	3:hsa;hsa-mir-26a-1,49,70,+	0.318407	0.173997
hsa-miR-3191-3p	4	7	7	0.34	0.19	19:hsa;hsa-mir-3191,46,68,-	0.3429	0.187382
hsa-miR-3684	6	7	7	0.34	0.19	4:hsa;hsa-mir-3684,48,68,+	0.3429	0.187382
hsa-miR-1247-5p	6	7	7	0.34	0.19	14:hsa;hsa-mir-1247,40,61,-	0.3429	0.187382
hsa-miR-1226-3p	4	7	7	0.34	0.19	3:hsa;hsa-mir-1226,54,75,+	0.3429	0.187382
hsa-miR-320d	2	7	0.97	0.34	0.19	13:hsa;hsa-mir-320d-1,30,48,-	0.0474306	0.025919
hsa-miR-3126-3p	6	7	7	0.34	0.19	2:hsa;hsa-mir-3126,46,67,+	0.3429	0.187382
hsa-miR-556-3p	3	7	7	0.34	0.19	1:hsa;hsa-mir-556,55,76,+	0.3429	0.187382
hsa-miR-4797-3p	6	6	6	0.29	0.16	3:hsa;hsa-mir-4797,41,61,-	0.293914	0.160613
hsa-miR-3911	3	6	6	0.29	0.16	9:hsa;hsa-mir-3911,12,33,-	0.293914	0.160613
hsa-miR-410-5p	4	6	6	0.29	0.16	14:hsa;hsa-mir-410,14,34,+	0.293914	0.160613
hsa-miR-5579-5p	2	6	6	0.29	0.16	11:hsa;hsa-mir-5579,1,21,-	0.293914	0.160613
hsa-miR-5579-3p	3	6	6	0.29	0.16	11:hsa;hsa-mir-5579,37,58,-	0.293914	0.160613
hsa-miR-6087	6	6	6	0.29	0.16	X:hsa;hsa-mir-6087,3,20,+	0.293914	0.160613
hsa-miR-636	6	6	6	0.29	0.16	17:hsa;hsa-mir-636,61,83,-	0.293914	0.160613
hsa-miR-509-3-5p	2	6	6	0.29	0.16	X:hsa;hsa-mir-509-3,10,31,-	0.293914	0.160613
hsa-miR-4795-3p	3	6	6	0.29	0.16	3:hsa;hsa-mir-4795,58,79,-	0.293914	0.160613
hsa-miR-4536-5p	4	6	3	0.29	0.16	X:hsa;hsa-mir-4536-1,2,22,-	0.146957	0.0803065
hsa-miR-3120-3p	5	6	6	0.29	0.16	1:hsa;hsa-mir-3120,51,71,+	0.293914	0.160613
hsa-miR-3127-5p	5	6	6	0.29	0.16	2:hsa;hsa-mir-3127,11,33,+	0.293914	0.160613
hsa-miR-4687-3p	6	6	6	0.29	0.16	11:hsa;hsa-mir-4687,52,72,+	0.293914	0.160613
hsa-miR-433-5p	4	6	6	0.29	0.16	14:hsa;hsa-mir-433,12,33,+	0.293914	0.160613
hsa-miR-3619-5p	5	6	6	0.29	0.16	22:hsa;hsa-mir-3619,16,37,+	0.293914	0.160613
hsa-miR-514a-3p	4	6	1.2	0.29	0.16	X:hsa;hsa-mir-514a-1,59,79,-	0.0587828	0.0321226
hsa-miR-3189-3p	5	6	6	0.29	0.16	19:hsa;hsa-mir-3189,46,66,+	0.293914	0.160613
hsa-miR-6508-3p	5	6	6	0.29	0.16	21:hsa;hsa-mir-6508,37,58,+	0.293914	0.160613
hsa-miR-514a-3p	4	6	1.2	0.29	0.16	X:hsa;hsa-mir-514a-2,54,74,-	0.0587828	0.0321226
hsa-miR-561-3p	3	6	6	0.29	0.16	2:hsa;hsa-mir-561,61,82,+	0.293914	0.160613
hsa-miR-101-5p	5	6	6	0.29	0.16	1:hsa;hsa-mir-101-1,11,32,-	0.293914	0.160613
hsa-miR-1243	4	6	6	0.29	0.16	4:hsa;hsa-mir-1243,5,26,+	0.293914	0.160613
hsa-miR-5581-3p	3	6	6	0.29	0.16	1:hsa;hsa-mir-5581,39,60,-	0.293914	0.160613
hsa-miR-3139	3	6	6	0.29	0.16	4:hsa;hsa-mir-3139,10,32,+	0.293914	0.160613
hsa-miR-514a-3p	4	6	1.2	0.29	0.16	X:hsa;hsa-mir-514a-2,54,74,-	0.0587828	0.0321226
hsa-miR-432-3p	2	6	6	0.29	0.16	14:hsa;hsa-mir-432,62,82,+	0.293914	0.160613
hsa-miR-6892-5p	5	6	6	0.29	0.16	7:hsa;hsa-mir-6892,1,21,+	0.293914	0.160613
hsa-miR-7845-5p	5	6	6	0.29	0.16	2:hsa;hsa-mir-7845,3,23,+	0.293914	0.160613
hsa-miR-4804-5p	5	6	6	0.29	0.16	5:hsa;hsa-mir-4804,10,30,+	0.293914	0.160613
hsa-miR-1343-5p	5	6	6	0.29	0.16	11:hsa;hsa-mir-1343,15,36,+	0.293914	0.160613
hsa-miR-4536-5p	4	6	3	0.29	0.16	X:hsa;hsa-mir-4536-2,2,22,+	0.146957	0.0803065
hsa-miR-6726-5p	3	6	6	0.29	0.16	1:hsa;hsa-mir-6726,6,26,-	0.293914	0.160613
hsa-miR-514a-3p	4	6	1.2	0.29	0.16	X:hsa;hsa-mir-514a-3,54,74,-	0.0587828	0.0321226
hsa-miR-3918	3	6	6	0.29	0.16	6:hsa;hsa-mir-3918,19,39,-	0.293914	0.160613
hsa-miR-514a-3p	4	6	1.2	0.29	0.16	X:hsa;hsa-mir-514a-3,54,74,-	0.0587828	0.0321226
hsa-miR-5004-3p	5	6	6	0.29	0.16	6:hsa;hsa-mir-5004,67,88,+	0.293914	0.160613
hsa-miR-1254	6	6	3	0.29	0.16	10:hsa;hsa-mir-1254-1,18,41,+	0.146957	0.0803065
hsa-miR-3126-5p	4	6	6	0.29	0.16	2:hsa;hsa-mir-3126,10,31,+	0.293914	0.160613
hsa-miR-1254	6	6	3	0.29	0.16	10:hsa;hsa-mir-1254-2,4,27,+	0.146957	0.0803065
hsa-miR-6818-5p	3	6	6	0.29	0.16	22:hsa;hsa-mir-6818,6,27,+	0.293914	0.160613
hsa-miR-4498	6	6	6	0.29	0.16	12:hsa;hsa-mir-4498,6,27,-	0.293914	0.160613
hsa-miR-3648	4	5	1.25	0.24	0.13	21:hsa;hsa-mir-3648-2,28,48,+	0.0612321	0.033461
hsa-miR-6509-3p	4	5	5	0.24	0.13	7:hsa;hsa-mir-6509,52,73,-	0.244928	0.133844
hsa-miR-4794	1	5	5	0.24	0.13	1:hsa;hsa-mir-4794,9,30,+	0.244928	0.133844
hsa-miR-3064-3p	3	5	5	0.24	0.13	17:hsa;hsa-mir-3064,43,65,-	0.244928	0.133844
hsa-miR-3136-5p	4	5	5	0.24	0.13	3:hsa;hsa-mir-3136,10,32,-	0.244928	0.133844
hsa-miR-3166	4	5	5	0.24	0.13	11:hsa;hsa-mir-3166,60,82,+	0.244928	0.133844
hsa-miR-2116-5p	5	5	5	0.24	0.13	15:hsa;hsa-mir-2116,14,34,-	0.244928	0.133844
hsa-miR-6770-5p	5	5	0.56	0.24	0.13	16:hsa;hsa-mir-6770-2,6,29,-	0.0272143	0.0148716
hsa-miR-4689	4	5	5	0.24	0.13	1:hsa;hsa-mir-4689,10,31,-	0.244928	0.133844
hsa-miR-6770-5p	5	5	0.56	0.24	0.13	16:hsa;hsa-mir-6770-3,6,29,-	0.0272143	0.0148716
hsa-miR-3681-5p	5	5	5	0.24	0.13	2:hsa;hsa-mir-3681,9,30,+	0.244928	0.133844
hsa-miR-6743-3p	5	5	5	0.24	0.13	11:hsa;hsa-mir-6743,48,70,+	0.244928	0.133844
hsa-miR-6724-5p	5	5	0.18	0.24	0.13	GL000220.1:hsa;hsa-mir-6724-1,11,33,+	0.00874744	0.00478015
hsa-miR-6724-5p	5	5	0.18	0.24	0.13	21:hsa;hsa-mir-6724-1,11,33,+	0.00874744	0.00478015
hsa-miR-588	4	5	5	0.24	0.13	6:hsa;hsa-mir-588,16,36,+	0.244928	0.133844
hsa-miR-4699-3p	4	5	5	0.24	0.13	12:hsa;hsa-mir-4699,46,67,+	0.244928	0.133844
hsa-miR-4768-5p	4	5	5	0.24	0.13	X:hsa;hsa-mir-4768,9,30,+	0.244928	0.133844
hsa-miR-4742-5p	4	5	5	0.24	0.13	1:hsa;hsa-mir-4742,1,23,-	0.244928	0.133844
hsa-miR-4742-3p	4	5	5	0.24	0.13	1:hsa;hsa-mir-4742,63,85,-	0.244928	0.133844
hsa-miR-6724-5p	5	5	0.18	0.24	0.13	21:hsa;hsa-mir-6724-4,11,33,+	0.00874744	0.00478015
hsa-miR-3680-5p	5	5	1.25	0.24	0.13	16:hsa;hsa-mir-3680-2,14,35,-	0.0612321	0.033461
hsa-miR-6724-5p	5	5	0.18	0.24	0.13	GL000220.1:hsa;hsa-mir-6724-3,11,33,+	0.00874744	0.00478015
hsa-miR-592	2	5	5	0.24	0.13	7:hsa;hsa-mir-592,16,37,-	0.244928	0.133844
hsa-miR-3648	4	5	1.25	0.24	0.13	21:hsa;hsa-mir-3648-1,28,48,+	0.0612321	0.033461
hsa-miR-4527	1	5	5	0.24	0.13	18:hsa;hsa-mir-4527,8,29,+	0.244928	0.133844
hsa-miR-6852-3p	5	5	5	0.24	0.13	9:hsa;hsa-mir-6852,42,58,-	0.244928	0.133844
hsa-miR-6770-5p	5	5	0.56	0.24	0.13	16:hsa;hsa-mir-6770-3,6,29,+	0.0272143	0.0148716
hsa-miR-548ao-3p	5	5	5	0.24	0.13	8:hsa;hsa-mir-548ao,58,79,-	0.244928	0.133844
hsa-miR-4676-5p	5	5	5	0.24	0.13	10:hsa;hsa-mir-4676,10,30,+	0.244928	0.133844
hsa-miR-6724-5p	5	5	0.18	0.24	0.13	21:hsa;hsa-mir-6724-1,11,33,+	0.00874744	0.00478015
hsa-miR-3619-3p	4	5	5	0.24	0.13	22:hsa;hsa-mir-3619,47,68,+	0.244928	0.133844
hsa-miR-6724-5p	5	5	0.18	0.24	0.13	21:hsa;hsa-mir-6724-3,11,33,+	0.00874744	0.00478015
hsa-miR-6724-5p	5	5	0.18	0.24	0.13	KI270733.1:hsa;hsa-mir-6724-4,11,33,+	0.00874744	0.00478015
hsa-miR-4738-3p	3	5	5	0.24	0.13	17:hsa;hsa-mir-4738,57,78,-	0.244928	0.133844
hsa-miR-770-5p	4	5	5	0.24	0.13	14:hsa;hsa-mir-770,20,42,+	0.244928	0.133844
hsa-miR-6724-5p	5	5	0.18	0.24	0.13	21:hsa;hsa-mir-6724-3,11,33,+	0.00874744	0.00478015
hsa-miR-3165	2	5	5	0.24	0.13	11:hsa;hsa-mir-3165,10,31,-	0.244928	0.133844
hsa-miR-4440	4	5	5	0.24	0.13	2:hsa;hsa-mir-4440,65,86,-	0.244928	0.133844
hsa-miR-3177-5p	4	5	5	0.24	0.13	16:hsa;hsa-mir-3177,11,33,+	0.244928	0.133844
hsa-miR-2278	4	5	5	0.24	0.13	9:hsa;hsa-mir-2278,16,37,+	0.244928	0.133844
hsa-miR-4796-3p	2	5	5	0.24	0.13	3:hsa;hsa-mir-4796,53,74,-	0.244928	0.133844
hsa-miR-6724-5p	5	5	0.18	0.24	0.13	GL000220.1:hsa;hsa-mir-6724-4,11,33,+	0.00874744	0.00478015
hsa-miR-1288-3p	3	5	5	0.24	0.13	17:hsa;hsa-mir-1288,45,65,+	0.244928	0.133844
hsa-miR-302b-3p	3	5	5	0.24	0.13	4:hsa;hsa-mir-302b,47,69,-	0.244928	0.133844
hsa-miR-3648	4	5	1.25	0.24	0.13	21:hsa;hsa-mir-3648-2,28,48,+	0.0612321	0.033461
hsa-miR-6770-5p	5	5	0.56	0.24	0.13	16:hsa;hsa-mir-6770-1,6,29,+	0.0272143	0.0148716
hsa-miR-6724-5p	5	5	0.18	0.24	0.13	GL000220.1:hsa;hsa-mir-6724-3,11,33,+	0.00874744	0.00478015
hsa-miR-6724-5p	5	5	0.18	0.24	0.13	21:hsa;hsa-mir-6724-4,11,33,+	0.00874744	0.00478015
hsa-miR-6724-5p	5	5	0.18	0.24	0.13	GL000220.1:hsa;hsa-mir-6724-2,11,33,+	0.00874744	0.00478015
hsa-miR-33b-5p	4	5	4.5	0.24	0.13	17:hsa;hsa-mir-33b,16,35,-	0.220435	0.12046
hsa-miR-4479	2	5	5	0.24	0.13	9:hsa;hsa-mir-4479,45,66,+	0.244928	0.133844
hsa-miR-3680-5p	5	5	1.25	0.24	0.13	16:hsa;hsa-mir-3680-2,14,35,-	0.0612321	0.033461
hsa-miR-6724-5p	5	5	0.18	0.24	0.13	21:hsa;hsa-mir-6724-3,11,33,+	0.00874744	0.00478015
hsa-miR-615-5p	3	5	5	0.24	0.13	12:hsa;hsa-mir-615,18,39,+	0.244928	0.133844
hsa-miR-4803	4	5	5	0.24	0.13	5:hsa;hsa-mir-4803,10,30,+	0.244928	0.133844
hsa-miR-3175	2	5	5	0.24	0.13	15:hsa;hsa-mir-3175,10,31,+	0.244928	0.133844
hsa-miR-6770-5p	5	5	0.56	0.24	0.13	16:hsa;hsa-mir-6770-2,6,29,+	0.0272143	0.0148716
hsa-miR-3680-5p	5	5	1.25	0.24	0.13	16:hsa;hsa-mir-3680-1,14,35,-	0.0612321	0.033461
hsa-miR-6724-5p	5	5	0.18	0.24	0.13	21:hsa;hsa-mir-6724-3,11,33,+	0.00874744	0.00478015
hsa-miR-6724-5p	5	5	0.18	0.24	0.13	21:hsa;hsa-mir-6724-1,11,33,+	0.00874744	0.00478015
hsa-miR-6724-5p	5	5	0.18	0.24	0.13	GL000220.1:hsa;hsa-mir-6724-4,11,33,+	0.00874744	0.00478015
hsa-miR-6770-5p	5	5	0.56	0.24	0.13	16:hsa;hsa-mir-6770-2,6,29,+	0.0272143	0.0148716
hsa-miR-3143	3	5	5	0.24	0.13	6:hsa;hsa-mir-3143,4,28,+	0.244928	0.133844
hsa-miR-451a	3	5	5	0.24	0.13	17:hsa;hsa-mir-451a,17,38,-	0.244928	0.133844
hsa-miR-6724-5p	5	5	0.18	0.24	0.13	KI270733.1:hsa;hsa-mir-6724-2,11,33,+	0.00874744	0.00478015
hsa-miR-935	4	5	5	0.24	0.13	19:hsa;hsa-mir-935,56,78,+	0.244928	0.133844
hsa-miR-590-5p	3	5	5	0.24	0.13	7:hsa;hsa-mir-590,16,37,+	0.244928	0.133844
hsa-miR-3680-5p	5	5	1.25	0.24	0.13	16:hsa;hsa-mir-3680-1,14,35,-	0.0612321	0.033461
hsa-miR-6724-5p	5	5	0.18	0.24	0.13	21:hsa;hsa-mir-6724-2,11,33,+	0.00874744	0.00478015
hsa-miR-7155-3p	5	5	5	0.24	0.13	11:hsa;hsa-mir-7155,38,56,-	0.244928	0.133844
hsa-miR-5002-5p	5	5	5	0.24	0.13	3:hsa;hsa-mir-5002,21,44,+	0.244928	0.133844
hsa-miR-6724-5p	5	5	0.18	0.24	0.13	21:hsa;hsa-mir-6724-1,11,33,+	0.00874744	0.00478015
hsa-miR-664b-5p	4	5	5	0.24	0.13	X:hsa;hsa-mir-664b,1,24,+	0.244928	0.133844
hsa-miR-4649-5p	5	5	5	0.24	0.13	7:hsa;hsa-mir-4649,3,26,+	0.244928	0.133844
hsa-miR-6724-5p	5	5	0.18	0.24	0.13	21:hsa;hsa-mir-6724-2,11,33,+	0.00874744	0.00478015
hsa-miR-6724-5p	5	5	0.18	0.24	0.13	21:hsa;hsa-mir-6724-2,11,33,+	0.00874744	0.00478015
hsa-miR-3648	4	5	1.25	0.24	0.13	21:hsa;hsa-mir-3648-1,28,48,+	0.0612321	0.033461
hsa-miR-141-3p	2	5	5	0.24	0.13	12:hsa;hsa-mir-141,59,80,+	0.244928	0.133844
hsa-miR-6724-5p	5	5	0.18	0.24	0.13	KI270733.1:hsa;hsa-mir-6724-3,11,33,+	0.00874744	0.00478015
hsa-miR-6770-5p	5	5	0.56	0.24	0.13	16:hsa;hsa-mir-6770-1,6,29,+	0.0272143	0.0148716
hsa-miR-6724-5p	5	5	0.18	0.24	0.13	GL000220.1:hsa;hsa-mir-6724-2,11,33,+	0.00874744	0.00478015
hsa-miR-6724-5p	5	5	0.18	0.24	0.13	KI270733.1:hsa;hsa-mir-6724-1,11,33,+	0.00874744	0.00478015
hsa-miR-6724-5p	5	5	0.18	0.24	0.13	21:hsa;hsa-mir-6724-2,11,33,+	0.00874744	0.00478015
hsa-miR-4662a-5p	2	5	5	0.24	0.13	8:hsa;hsa-mir-4662a,6,27,+	0.244928	0.133844
hsa-miR-7854-3p	4	5	5	0.24	0.13	16:hsa;hsa-mir-7854,41,61,+	0.244928	0.133844
hsa-miR-4690-3p	3	5	5	0.24	0.13	11:hsa;hsa-mir-4690,39,59,+	0.244928	0.133844
hsa-miR-6770-5p	5	5	0.56	0.24	0.13	16:hsa;hsa-mir-6770-1,6,29,-	0.0272143	0.0148716
hsa-miR-4688	5	5	5	0.24	0.13	11:hsa;hsa-mir-4688,55,76,+	0.244928	0.133844
hsa-miR-151b	4	5	3	0.24	0.13	14:hsa;hsa-mir-151b,60,77,-	0.146957	0.0803065
hsa-miR-6724-5p	5	5	0.18	0.24	0.13	21:hsa;hsa-mir-6724-4,11,33,+	0.00874744	0.00478015
hsa-miR-6502-5p	4	5	5	0.24	0.13	12:hsa;hsa-mir-6502,10,31,+	0.244928	0.133844
hsa-miR-6770-5p	5	5	0.56	0.24	0.13	16:hsa;hsa-mir-6770-3,6,29,+	0.0272143	0.0148716
hsa-miR-6724-5p	5	5	0.18	0.24	0.13	GL000220.1:hsa;hsa-mir-6724-1,11,33,+	0.00874744	0.00478015
hsa-miR-6724-5p	5	5	0.18	0.24	0.13	21:hsa;hsa-mir-6724-4,11,33,+	0.00874744	0.00478015
hsa-miR-1267	2	4	4	0.2	0.11	13:hsa;hsa-mir-1267,12,32,-	0.195943	0.107075
hsa-miR-2276-3p	4	4	4	0.2	0.11	13:hsa;hsa-mir-2276,54,75,+	0.195943	0.107075
hsa-miR-6770-3p	4	4	0.44	0.2	0.11	16:hsa;hsa-mir-6770-2,40,60,-	0.0217714	0.0118973
hsa-miR-1908-3p	4	4	4	0.2	0.11	11:hsa;hsa-mir-1908,49,69,-	0.195943	0.107075
hsa-miR-15a-3p	1	4	4	0.2	0.11	13:hsa;hsa-mir-15a,51,72,-	0.195943	0.107075
hsa-miR-6770-3p	4	4	0.44	0.2	0.11	16:hsa;hsa-mir-6770-3,40,60,-	0.0217714	0.0118973
hsa-miR-219a-2-3p	3	4	4	0.2	0.11	9:hsa;hsa-mir-219a-2,62,83,-	0.195943	0.107075
hsa-miR-1257	4	4	4	0.2	0.11	20:hsa;hsa-mir-1257,22,42,-	0.195943	0.107075
hsa-miR-5697	2	4	4	0.2	0.11	1:hsa;hsa-mir-5697,10,31,+	0.195943	0.107075
hsa-miR-6511b-3p	4	4	1.25	0.2	0.11	16:hsa;hsa-mir-6511b-1,53,75,-	0.0612321	0.033461
hsa-miR-6721-5p	3	4	4	0.2	0.11	6:hsa;hsa-mir-6721,11,33,-	0.195943	0.107075
hsa-miR-552-3p	2	4	4	0.2	0.11	1:hsa;hsa-mir-552,61,81,-	0.195943	0.107075
hsa-miR-4449	4	4	4	0.2	0.11	4:hsa;hsa-mir-4449,39,60,+	0.195943	0.107075
hsa-miR-3193	1	4	4	0.2	0.11	20:hsa;hsa-mir-3193,1,22,+	0.195943	0.107075
hsa-miR-3682-3p	4	4	4	0.2	0.11	2:hsa;hsa-mir-3682,50,70,-	0.195943	0.107075
hsa-miR-10a-3p	2	4	4	0.2	0.11	17:hsa;hsa-mir-10a,63,84,-	0.195943	0.107075
hsa-miR-4757-3p	4	4	4	0.2	0.11	2:hsa;hsa-mir-4757,48,69,+	0.195943	0.107075
hsa-miR-550b-2-5p	4	4	1.7	0.2	0.11	7:hsa;hsa-mir-550b-2,16,37,-	0.0832756	0.045507
hsa-miR-6770-3p	4	4	0.44	0.2	0.11	16:hsa;hsa-mir-6770-3,40,60,+	0.0217714	0.0118973
hsa-miR-4707-3p	2	4	4	0.2	0.11	14:hsa;hsa-mir-4707,52,73,-	0.195943	0.107075
hsa-miR-3131	3	4	4	0.2	0.11	2:hsa;hsa-mir-3131,4,26,-	0.195943	0.107075
hsa-miR-150-5p	1	4	4	0.2	0.11	19:hsa;hsa-mir-150,16,37,-	0.195943	0.107075
hsa-miR-4510	3	4	1.1	0.2	0.11	15:hsa;hsa-mir-4510,8,29,+	0.0538842	0.0294457
hsa-miR-5189-3p	4	4	4	0.2	0.11	16:hsa;hsa-mir-5189,67,87,+	0.195943	0.107075
hsa-miR-6511b-3p	4	4	1.25	0.2	0.11	16:hsa;hsa-mir-6511b-1,53,75,-	0.0612321	0.033461
hsa-miR-3152-3p	3	4	4	0.2	0.11	9:hsa;hsa-mir-3152,45,66,+	0.195943	0.107075
hsa-miR-5188	3	4	4	0.2	0.11	12:hsa;hsa-mir-5188,64,86,+	0.195943	0.107075
hsa-miR-6785-5p	4	4	4	0.2	0.11	17:hsa;hsa-mir-6785,6,27,+	0.195943	0.107075
hsa-miR-589-3p	3	4	4	0.2	0.11	7:hsa;hsa-mir-589,61,84,-	0.195943	0.107075
hsa-miR-550b-2-5p	4	4	1.7	0.2	0.11	7:hsa;hsa-mir-550b-1,16,37,-	0.0832756	0.045507
hsa-miR-4439	4	4	4	0.2	0.11	2:hsa;hsa-mir-4439,4,25,-	0.195943	0.107075
hsa-miR-6770-3p	4	4	0.44	0.2	0.11	16:hsa;hsa-mir-6770-1,40,60,+	0.0217714	0.0118973
hsa-miR-3192-3p	3	4	4	0.2	0.11	20:hsa;hsa-mir-3192,48,68,+	0.195943	0.107075
hsa-miR-1286	4	4	4	0.2	0.11	22:hsa;hsa-mir-1286,47,67,-	0.195943	0.107075
hsa-miR-7705	2	4	4	0.2	0.11	8:hsa;hsa-mir-7705,1,23,-	0.195943	0.107075
hsa-miR-2467-5p	2	4	4	0.2	0.11	2:hsa;hsa-mir-2467,12,34,-	0.195943	0.107075
hsa-miR-6770-3p	4	4	0.44	0.2	0.11	16:hsa;hsa-mir-6770-2,40,60,+	0.0217714	0.0118973
hsa-miR-6770-3p	4	4	0.44	0.2	0.11	16:hsa;hsa-mir-6770-2,40,60,+	0.0217714	0.0118973
hsa-miR-5690	3	4	4	0.2	0.11	6:hsa;hsa-mir-5690,10,30,-	0.195943	0.107075
hsa-miR-676-3p	3	4	4	0.2	0.11	X:hsa;hsa-mir-676,43,63,+	0.195943	0.107075
hsa-miR-1537-5p	2	4	4	0.2	0.11	1:hsa;hsa-mir-1537,3,24,-	0.195943	0.107075
hsa-miR-412-3p	4	4	4	0.2	0.11	14:hsa;hsa-mir-412,54,76,+	0.195943	0.107075
hsa-miR-4511	4	4	4	0.2	0.11	15:hsa;hsa-mir-4511,15,36,-	0.195943	0.107075
hsa-miR-6821-5p	4	4	4	0.2	0.11	22:hsa;hsa-mir-6821,1,23,+	0.195943	0.107075
hsa-miR-3125	4	4	4	0.2	0.11	2:hsa;hsa-mir-3125,10,29,+	0.195943	0.107075
hsa-miR-3135a	3	4	4	0.2	0.11	3:hsa;hsa-mir-3135a,10,31,+	0.195943	0.107075
hsa-miR-6770-3p	4	4	0.44	0.2	0.11	16:hsa;hsa-mir-6770-1,40,60,+	0.0217714	0.0118973
hsa-miR-217	3	4	4	0.2	0.11	2:hsa;hsa-mir-217,35,57,-	0.195943	0.107075
hsa-miR-6770-3p	4	4	0.44	0.2	0.11	16:hsa;hsa-mir-6770-1,40,60,-	0.0217714	0.0118973
hsa-miR-6770-3p	4	4	0.44	0.2	0.11	16:hsa;hsa-mir-6770-3,40,60,+	0.0217714	0.0118973
hsa-miR-6837-3p	3	4	4	0.2	0.11	7:hsa;hsa-mir-6837,42,64,+	0.195943	0.107075
hsa-miR-3121-3p	3	3	3	0.15	0.08	1:hsa;hsa-mir-3121,47,68,-	0.146957	0.0803065
hsa-miR-6509-5p	3	3	3	0.15	0.08	7:hsa;hsa-mir-6509,15,35,-	0.146957	0.0803065
hsa-miR-4655-5p	3	3	3	0.15	0.08	7:hsa;hsa-mir-4655,10,31,-	0.146957	0.0803065
hsa-miR-6786-3p	3	3	3	0.15	0.08	17:hsa;hsa-mir-6786,88,110,+	0.146957	0.0803065
hsa-miR-4786-5p	3	3	3	0.15	0.08	2:hsa;hsa-mir-4786,11,32,-	0.146957	0.0803065
hsa-miR-6513-5p	3	3	3	0.15	0.08	2:hsa;hsa-mir-6513,3,25,-	0.146957	0.0803065
hsa-miR-4789-5p	3	3	3	0.15	0.08	3:hsa;hsa-mir-4789,13,34,+	0.146957	0.0803065
hsa-miR-4708-3p	3	3	3	0.15	0.08	14:hsa;hsa-mir-4708,40,61,-	0.146957	0.0803065
hsa-miR-6764-5p	2	3	3	0.15	0.08	14:hsa;hsa-mir-6764,6,27,+	0.146957	0.0803065
hsa-miR-4515	3	3	3	0.15	0.08	15:hsa;hsa-mir-4515,15,36,+	0.146957	0.0803065
hsa-miR-4712-5p	3	3	3	0.15	0.08	15:hsa;hsa-mir-4712,9,30,+	0.146957	0.0803065
hsa-miR-4767	3	3	3	0.15	0.08	X:hsa;hsa-mir-4767,10,32,+	0.146957	0.0803065
hsa-miR-6746-3p	3	3	3	0.15	0.08	11:hsa;hsa-mir-6746,42,63,-	0.146957	0.0803065
hsa-miR-635	2	3	3	0.15	0.08	17:hsa;hsa-mir-635,16,38,-	0.146957	0.0803065
hsa-miR-6762-5p	3	3	3	0.15	0.08	12:hsa;hsa-mir-6762,6,28,+	0.146957	0.0803065
hsa-miR-4679	3	3	1.5	0.15	0.08	10:hsa;hsa-mir-4679-2,10,31,-	0.0734785	0.0401532
hsa-miR-4421	3	3	3	0.15	0.08	1:hsa;hsa-mir-4421,43,64,+	0.146957	0.0803065
hsa-miR-4740-5p	3	3	3	0.15	0.08	17:hsa;hsa-mir-4740,5,26,-	0.146957	0.0803065
hsa-miR-198	2	3	3	0.15	0.08	3:hsa;hsa-mir-198,6,27,-	0.146957	0.0803065
hsa-miR-6511b-3p	3	3	0.75	0.15	0.08	16:hsa;hsa-mir-6511b-2,48,70,-	0.0367392	0.0200766
hsa-miR-4684-5p	2	3	3	0.15	0.08	1:hsa;hsa-mir-4684,14,35,+	0.146957	0.0803065
hsa-miR-3680-3p	3	3	0.75	0.15	0.08	16:hsa;hsa-mir-3680-2,50,72,-	0.0367392	0.0200766
hsa-miR-624-3p	3	3	3	0.15	0.08	14:hsa;hsa-mir-624,54,74,-	0.146957	0.0803065
hsa-miR-338-5p	1	3	3	0.15	0.08	17:hsa;hsa-mir-338,6,27,-	0.146957	0.0803065
hsa-miR-4679	3	3	1.5	0.15	0.08	10:hsa;hsa-mir-4679-1,9,30,+	0.0734785	0.0401532
hsa-miR-4707-5p	3	3	3	0.15	0.08	14:hsa;hsa-mir-4707,10,32,-	0.146957	0.0803065
hsa-miR-4637	3	3	3	0.15	0.08	5:hsa;hsa-mir-4637,60,81,-	0.146957	0.0803065
hsa-miR-144-5p	3	3	3	0.15	0.08	17:hsa;hsa-mir-144,15,36,-	0.146957	0.0803065
hsa-miR-144-3p	1	3	3	0.15	0.08	17:hsa;hsa-mir-144,52,71,-	0.146957	0.0803065
hsa-miR-6838-5p	2	3	3	0.15	0.08	7:hsa;hsa-mir-6838,6,27,-	0.146957	0.0803065
hsa-miR-4671-5p	1	3	3	0.15	0.08	1:hsa;hsa-mir-4671,10,31,+	0.146957	0.0803065
hsa-miR-3145-5p	2	3	3	0.15	0.08	6:hsa;hsa-mir-3145,12,33,-	0.146957	0.0803065
hsa-miR-3145-3p	3	3	3	0.15	0.08	6:hsa;hsa-mir-3145,49,72,-	0.146957	0.0803065
hsa-miR-4254	3	3	3	0.15	0.08	1:hsa;hsa-mir-4254,44,66,-	0.146957	0.0803065
hsa-miR-139-3p	2	3	3	0.15	0.08	11:hsa;hsa-mir-139,43,65,-	0.146957	0.0803065
hsa-miR-3115	3	3	3	0.15	0.08	1:hsa;hsa-mir-3115,6,25,+	0.146957	0.0803065
hsa-miR-1255a	3	3	3	0.15	0.08	4:hsa;hsa-mir-1255a,28,50,-	0.146957	0.0803065
hsa-miR-3919	3	3	3	0.15	0.08	3:hsa;hsa-mir-3919,55,75,+	0.146957	0.0803065
hsa-miR-3529-5p	2	3	3	0.15	0.08	15:hsa;hsa-mir-3529,10,31,-	0.146957	0.0803065
hsa-miR-6805-5p	3	3	3	0.15	0.08	19:hsa;hsa-mir-6805,6,27,+	0.146957	0.0803065
hsa-miR-4642	2	3	3	0.15	0.08	6:hsa;hsa-mir-4642,10,31,+	0.146957	0.0803065
hsa-miR-5696	3	3	3	0.15	0.08	2:hsa;hsa-mir-5696,4,25,+	0.146957	0.0803065
hsa-miR-6806-3p	3	3	3	0.15	0.08	19:hsa;hsa-mir-6806,43,64,+	0.146957	0.0803065
hsa-miR-3192-5p	2	3	3	0.15	0.08	20:hsa;hsa-mir-3192,10,32,+	0.146957	0.0803065
hsa-miR-6511b-3p	3	3	0.75	0.15	0.08	16:hsa;hsa-mir-6511b-2,48,70,-	0.0367392	0.0200766
hsa-miR-3680-3p	3	3	0.75	0.15	0.08	16:hsa;hsa-mir-3680-2,50,72,-	0.0367392	0.0200766
hsa-miR-6871-3p	3	3	3	0.15	0.08	20:hsa;hsa-mir-6871,35,56,+	0.146957	0.0803065
hsa-miR-7-2-3p	3	3	3	0.15	0.08	15:hsa;hsa-mir-7-2,72,93,+	0.146957	0.0803065
hsa-miR-3124-5p	2	3	3	0.15	0.08	1:hsa;hsa-mir-3124,7,27,+	0.146957	0.0803065
hsa-miR-1305	2	3	3	0.15	0.08	4:hsa;hsa-mir-1305,51,72,+	0.146957	0.0803065
hsa-miR-3680-3p	3	3	0.75	0.15	0.08	16:hsa;hsa-mir-3680-1,50,72,-	0.0367392	0.0200766
hsa-miR-1179	2	3	3	0.15	0.08	15:hsa;hsa-mir-1179,15,35,+	0.146957	0.0803065
hsa-miR-3130-3p	2	3	1.5	0.15	0.08	2:hsa;hsa-mir-3130-2,44,64,+	0.0734785	0.0401532
hsa-miR-5003-3p	3	3	3	0.15	0.08	5:hsa;hsa-mir-5003,58,78,+	0.146957	0.0803065
hsa-miR-3685	3	3	3	0.15	0.08	12:hsa;hsa-mir-3685,6,27,+	0.146957	0.0803065
hsa-miR-544b	2	3	3	0.15	0.08	3:hsa;hsa-mir-544b,48,69,+	0.146957	0.0803065
hsa-miR-6726-3p	3	3	3	0.15	0.08	1:hsa;hsa-mir-6726,42,61,-	0.146957	0.0803065
hsa-miR-3680-3p	3	3	0.75	0.15	0.08	16:hsa;hsa-mir-3680-1,50,72,-	0.0367392	0.0200766
hsa-miR-3130-3p	2	3	1.5	0.15	0.08	2:hsa;hsa-mir-3130-1,44,64,-	0.0734785	0.0401532
hsa-miR-187-3p	2	3	3	0.15	0.08	18:hsa;hsa-mir-187,71,92,-	0.146957	0.0803065
hsa-miR-2682-3p	3	3	3	0.15	0.08	1:hsa;hsa-mir-2682,60,81,-	0.146957	0.0803065
hsa-miR-4722-5p	3	3	3	0.15	0.08	16:hsa;hsa-mir-4722,1,23,-	0.146957	0.0803065
hsa-miR-6855-3p	3	3	3	0.15	0.08	9:hsa;hsa-mir-6855,46,67,+	0.146957	0.0803065
hsa-miR-6772-3p	3	3	3	0.15	0.08	16:hsa;hsa-mir-6772,41,63,-	0.146957	0.0803065
hsa-miR-6715a-3p	1	3	3	0.15	0.08	10:hsa;hsa-mir-6715a,49,69,+	0.146957	0.0803065
hsa-miR-4788	2	3	3	0.15	0.08	3:hsa;hsa-mir-4788,10,31,+	0.146957	0.0803065
hsa-miR-4706	2	3	3	0.15	0.08	14:hsa;hsa-mir-4706,10,34,+	0.146957	0.0803065
hsa-miR-5010-5p	3	3	3	0.15	0.08	17:hsa;hsa-mir-5010,21,42,+	0.146957	0.0803065
hsa-miR-6753-3p	2	3	3	0.15	0.08	11:hsa;hsa-mir-6753,139,160,+	0.146957	0.0803065
hsa-miR-4728-3p	2	3	3	0.15	0.08	17:hsa;hsa-mir-4728,43,67,+	0.146957	0.0803065
hsa-miR-4792	2	3	3	0.15	0.08	3:hsa;hsa-mir-4792,7,24,-	0.146957	0.0803065
hsa-miR-4672	3	3	3	0.15	0.08	9:hsa;hsa-mir-4672,51,71,-	0.146957	0.0803065
hsa-miR-570-3p	1	3	3	0.15	0.08	3:hsa;hsa-mir-570,60,81,+	0.146957	0.0803065
hsa-miR-4680-5p	2	3	3	0.15	0.08	10:hsa;hsa-mir-4680,5,27,+	0.146957	0.0803065
hsa-miR-3916	3	3	3	0.15	0.08	1:hsa;hsa-mir-3916,20,45,-	0.146957	0.0803065
hsa-miR-6780a-5p	3	3	3	0.15	0.08	17:hsa;hsa-mir-6780a,6,28,-	0.146957	0.0803065
hsa-miR-6734-5p	3	3	3	0.15	0.08	1:hsa;hsa-mir-6734,6,28,-	0.146957	0.0803065
hsa-miR-129-1-3p	2	3	3	0.15	0.08	7:hsa;hsa-mir-129-1,49,70,+	0.146957	0.0803065
hsa-miR-3692-3p	3	3	3	0.15	0.08	6:hsa;hsa-mir-3692,44,67,+	0.146957	0.0803065
hsa-miR-4802-3p	2	3	3	0.15	0.08	4:hsa;hsa-mir-4802,47,69,-	0.146957	0.0803065
hsa-miR-6741-3p	2	3	3	0.15	0.08	1:hsa;hsa-mir-6741,42,63,-	0.146957	0.0803065
hsa-miR-4797-5p	1	2	2	0.1	0.05	3:hsa;hsa-mir-4797,10,30,-	0.0979713	0.0535376
hsa-miR-4798-5p	2	2	2	0.1	0.05	4:hsa;hsa-mir-4798,10,31,+	0.0979713	0.0535376
hsa-miR-548aw	2	2	2	0.1	0.05	9:hsa;hsa-mir-548aw,8,27,+	0.0979713	0.0535376
hsa-miR-4745-5p	1	2	2	0.1	0.05	19:hsa;hsa-mir-4745,2,24,+	0.0979713	0.0535376
hsa-miR-6747-5p	2	2	2	0.1	0.05	11:hsa;hsa-mir-6747,6,29,-	0.0979713	0.0535376
hsa-miR-3942-3p	1	2	2	0.1	0.05	15:hsa;hsa-mir-3942,65,85,-	0.0979713	0.0535376
hsa-miR-6779-5p	2	2	2	0.1	0.05	17:hsa;hsa-mir-6779,6,26,+	0.0979713	0.0535376
hsa-miR-6748-5p	2	2	2	0.1	0.05	11:hsa;hsa-mir-6748,6,27,+	0.0979713	0.0535376
hsa-miR-3065-3p	1	2	2	0.1	0.05	17:hsa;hsa-mir-3065,50,72,+	0.0979713	0.0535376
hsa-miR-1249-5p	2	2	2	0.1	0.05	22:hsa;hsa-mir-1249,4,27,-	0.0979713	0.0535376
hsa-miR-3202	1	2	1	0.1	0.05	X:hsa;hsa-mir-3202-1,9,30,+	0.0489857	0.0267688
hsa-miR-1284	2	2	2	0.1	0.05	3:hsa;hsa-mir-1284,30,51,-	0.0979713	0.0535376
hsa-miR-3202	1	2	1	0.1	0.05	X:hsa;hsa-mir-3202-2,8,29,-	0.0489857	0.0267688
hsa-miR-6800-3p	2	2	2	0.1	0.05	19:hsa;hsa-mir-6800,59,79,+	0.0979713	0.0535376
hsa-miR-6850-5p	1	2	2	0.1	0.05	8:hsa;hsa-mir-6850,1,22,-	0.0979713	0.0535376
hsa-miR-219a-5p	2	2	1	0.1	0.05	9:hsa;hsa-mir-219a-2,19,39,-	0.0489857	0.0267688
hsa-miR-6746-5p	2	2	2	0.1	0.05	11:hsa;hsa-mir-6746,6,27,-	0.0979713	0.0535376
hsa-miR-627-3p	2	2	2	0.1	0.05	15:hsa;hsa-mir-627,55,74,-	0.0979713	0.0535376
hsa-miR-1283	1	2	1	0.1	0.05	19:hsa;hsa-mir-1283-2,14,35,+	0.0489857	0.0267688
hsa-miR-3654	2	2	2	0.1	0.05	7:hsa;hsa-mir-3654,38,56,-	0.0979713	0.0535376
hsa-miR-6750-5p	2	2	2	0.1	0.05	11:hsa;hsa-mir-6750,6,29,-	0.0979713	0.0535376
hsa-miR-6762-3p	2	2	2	0.1	0.05	12:hsa;hsa-mir-6762,64,86,+	0.0979713	0.0535376
hsa-miR-4669	2	2	2	0.1	0.05	9:hsa;hsa-mir-4669,39,60,+	0.0979713	0.0535376
hsa-miR-6825-5p	2	2	2	0.1	0.05	3:hsa;hsa-mir-6825,6,27,-	0.0979713	0.0535376
hsa-miR-4695-3p	2	2	2	0.1	0.05	1:hsa;hsa-mir-4695,51,72,-	0.0979713	0.0535376
hsa-miR-3120-5p	2	2	2	0.1	0.05	1:hsa;hsa-mir-3120,13,33,+	0.0979713	0.0535376
hsa-miR-500b-5p	2	2	1	0.1	0.05	X:hsa;hsa-mir-500b,11,28,+	0.0489857	0.0267688
hsa-miR-135b-3p	2	2	2	0.1	0.05	1:hsa;hsa-mir-135b,55,76,-	0.0979713	0.0535376
hsa-miR-4773	1	2	1	0.1	0.05	2:hsa;hsa-mir-4773-2,48,69,-	0.0489857	0.0267688
hsa-miR-6815-3p	2	2	2	0.1	0.05	21:hsa;hsa-mir-6815,41,61,+	0.0979713	0.0535376
hsa-miR-155-3p	2	2	2	0.1	0.05	21:hsa;hsa-mir-155,43,64,+	0.0979713	0.0535376
hsa-miR-5588-5p	2	2	2	0.1	0.05	3:hsa;hsa-mir-5588,1,21,-	0.0979713	0.0535376
hsa-miR-4757-5p	1	2	2	0.1	0.05	2:hsa;hsa-mir-4757,11,33,+	0.0979713	0.0535376
hsa-miR-4504	1	2	2	0.1	0.05	14:hsa;hsa-mir-4504,55,76,-	0.0979713	0.0535376
hsa-miR-1283	1	2	1	0.1	0.05	19:hsa;hsa-mir-1283-1,14,35,+	0.0489857	0.0267688
hsa-miR-4466	2	2	2	0.1	0.05	6:hsa;hsa-mir-4466,5,22,-	0.0979713	0.0535376
hsa-miR-3675-3p	2	2	1	0.1	0.05	KI270714.1:hsa;hsa-mir-3675,43,64,+	0.0489857	0.0267688
hsa-miR-4523	2	2	2	0.1	0.05	17:hsa;hsa-mir-4523,7,27,+	0.0979713	0.0535376
hsa-miR-6742-5p	2	2	2	0.1	0.05	1:hsa;hsa-mir-6742,6,27,-	0.0979713	0.0535376
hsa-miR-3146	2	2	2	0.1	0.05	7:hsa;hsa-mir-3146,50,71,-	0.0979713	0.0535376
hsa-miR-133a-5p	2	2	1	0.1	0.05	18:hsa;hsa-mir-133a-1,16,37,-	0.0489857	0.0267688
hsa-miR-6777-5p	2	2	2	0.1	0.05	17:hsa;hsa-mir-6777,6,28,-	0.0979713	0.0535376
hsa-miR-3173-3p	2	2	2	0.1	0.05	14:hsa;hsa-mir-3173,43,64,-	0.0979713	0.0535376
hsa-miR-7106-5p	2	2	2	0.1	0.05	12:hsa;hsa-mir-7106,6,25,-	0.0979713	0.0535376
hsa-miR-598-5p	2	2	2	0.1	0.05	8:hsa;hsa-mir-598,24,46,-	0.0979713	0.0535376
hsa-miR-6766-5p	2	2	2	0.1	0.05	15:hsa;hsa-mir-6766,6,29,-	0.0979713	0.0535376
hsa-miR-758-5p	2	2	2	0.1	0.05	14:hsa;hsa-mir-758,15,36,+	0.0979713	0.0535376
hsa-miR-5189-5p	2	2	2	0.1	0.05	16:hsa;hsa-mir-5189,26,49,+	0.0979713	0.0535376
hsa-miR-133a-5p	2	2	1	0.1	0.05	20:hsa;hsa-mir-133a-2,22,43,+	0.0489857	0.0267688
hsa-miR-6757-5p	2	2	2	0.1	0.05	12:hsa;hsa-mir-6757,6,27,+	0.0979713	0.0535376
hsa-miR-4773	1	2	1	0.1	0.05	2:hsa;hsa-mir-4773-1,48,69,+	0.0489857	0.0267688
hsa-miR-3074-3p	1	2	2	0.1	0.05	9:hsa;hsa-mir-3074,50,71,-	0.0979713	0.0535376
hsa-miR-492	2	2	2	0.1	0.05	12:hsa;hsa-mir-492,30,52,+	0.0979713	0.0535376
hsa-miR-422a	2	2	2	0.1	0.05	15:hsa;hsa-mir-422a,10,31,-	0.0979713	0.0535376
hsa-miR-5680	2	2	2	0.1	0.05	8:hsa;hsa-mir-5680,52,73,+	0.0979713	0.0535376
hsa-miR-1273c	2	2	2	0.1	0.05	6:hsa;hsa-mir-1273c,10,31,+	0.0979713	0.0535376
hsa-miR-5683	2	2	2	0.1	0.05	6:hsa;hsa-mir-5683,10,33,+	0.0979713	0.0535376
hsa-miR-216a-3p	2	2	2	0.1	0.05	2:hsa;hsa-mir-216a,58,79,-	0.0979713	0.0535376
hsa-miR-1252-5p	2	2	2	0.1	0.05	12:hsa;hsa-mir-1252,5,26,+	0.0979713	0.0535376
hsa-miR-2681-3p	2	2	2	0.1	0.05	13:hsa;hsa-mir-2681,61,82,-	0.0979713	0.0535376
hsa-miR-4761-5p	2	2	2	0.1	0.05	22:hsa;hsa-mir-4761,3,23,+	0.0979713	0.0535376
hsa-miR-3941	2	2	2	0.1	0.05	10:hsa;hsa-mir-3941,60,81,+	0.0979713	0.0535376
hsa-miR-517b-3p	2	2	1	0.1	0.05	19:hsa;hsa-mir-517b,43,64,+	0.0489857	0.0267688
hsa-miR-6889-5p	2	2	2	0.1	0.05	22:hsa;hsa-mir-6889,6,28,-	0.0979713	0.0535376
hsa-miR-320c	2	2	0.61	0.1	0.05	19:hsa;hsa-mir-320e,34,53,-	0.0299357	0.0163587
hsa-miR-320e	2	2	0.61	0.1	0.05	19:hsa;hsa-mir-320e,35,52,-	0.0299357	0.0163587
hsa-miR-302a-3p	1	2	2	0.1	0.05	4:hsa;hsa-mir-302a,44,66,-	0.0979713	0.0535376
hsa-miR-874-5p	2	2	2	0.1	0.05	5:hsa;hsa-mir-874,10,32,-	0.0979713	0.0535376
hsa-miR-6847-3p	2	2	2	0.1	0.05	8:hsa;hsa-mir-6847,45,66,+	0.0979713	0.0535376
hsa-miR-4654	2	2	2	0.1	0.05	1:hsa;hsa-mir-4654,10,31,+	0.0979713	0.0535376
hsa-miR-3191-5p	2	2	2	0.1	0.05	19:hsa;hsa-mir-3191,9,30,-	0.0979713	0.0535376
hsa-miR-586	2	2	2	0.1	0.05	6:hsa;hsa-mir-586,16,37,-	0.0979713	0.0535376
hsa-miR-3943	2	2	2	0.1	0.05	7:hsa;hsa-mir-3943,23,45,+	0.0979713	0.0535376
hsa-miR-211-5p	1	2	1	0.1	0.05	15:hsa;hsa-mir-211,26,47,-	0.0489857	0.0267688
hsa-miR-4651	2	2	2	0.1	0.05	7:hsa;hsa-mir-4651,10,29,+	0.0979713	0.0535376
hsa-miR-6798-3p	1	2	2	0.1	0.05	19:hsa;hsa-mir-6798,47,67,+	0.0979713	0.0535376
hsa-miR-3160-3p	2	2	1	0.1	0.05	11:hsa;hsa-mir-3160-2,52,73,+	0.0489857	0.0267688
hsa-miR-7850-5p	2	2	2	0.1	0.05	19:hsa;hsa-mir-7850,9,29,+	0.0979713	0.0535376
hsa-miR-3939	2	2	2	0.1	0.05	6:hsa;hsa-mir-3939,62,83,-	0.0979713	0.0535376
hsa-miR-1247-3p	2	2	2	0.1	0.05	14:hsa;hsa-mir-1247,74,97,-	0.0979713	0.0535376
hsa-miR-6861-3p	2	2	2	0.1	0.05	12:hsa;hsa-mir-6861,40,57,-	0.0979713	0.0535376
hsa-miR-548j-3p	2	2	2	0.1	0.05	22:hsa;hsa-mir-548j,65,85,-	0.0979713	0.0535376
hsa-miR-659-3p	2	2	2	0.1	0.05	22:hsa;hsa-mir-659,61,82,-	0.0979713	0.0535376
hsa-miR-4715-5p	2	2	2	0.1	0.05	15:hsa;hsa-mir-4715,10,31,-	0.0979713	0.0535376
hsa-miR-1537-3p	1	2	2	0.1	0.05	1:hsa;hsa-mir-1537,40,61,-	0.0979713	0.0535376
hsa-miR-6782-3p	2	2	2	0.1	0.05	17:hsa;hsa-mir-6782,46,68,-	0.0979713	0.0535376
hsa-miR-6851-5p	2	2	2	0.1	0.05	9:hsa;hsa-mir-6851,6,28,-	0.0979713	0.0535376
hsa-miR-6738-3p	2	2	2	0.1	0.05	1:hsa;hsa-mir-6738,41,64,-	0.0979713	0.0535376
hsa-miR-6781-5p	2	2	2	0.1	0.05	17:hsa;hsa-mir-6781,6,26,-	0.0979713	0.0535376
hsa-miR-765	2	2	2	0.1	0.05	1:hsa;hsa-mir-765,69,89,-	0.0979713	0.0535376
hsa-miR-3160-3p	2	2	1	0.1	0.05	11:hsa;hsa-mir-3160-1,54,75,-	0.0489857	0.0267688
hsa-miR-5698	2	2	2	0.1	0.05	1:hsa;hsa-mir-5698,10,31,-	0.0979713	0.0535376
hsa-miR-6857-3p	2	2	2	0.1	0.05	X:hsa;hsa-mir-6857,73,93,-	0.0979713	0.0535376
hsa-miR-4647	2	2	2	0.1	0.05	6:hsa;hsa-mir-4647,11,33,-	0.0979713	0.0535376
hsa-miR-3184-3p	2	2	2	0.1	0.05	17:hsa;hsa-mir-3184,44,66,-	0.0979713	0.0535376
hsa-miR-4286	1	2	2	0.1	0.05	8:hsa;hsa-mir-4286,11,27,+	0.0979713	0.0535376
hsa-miR-3188	2	2	2	0.1	0.05	19:hsa;hsa-mir-3188,53,75,+	0.0979713	0.0535376
hsa-miR-6874-3p	2	2	2	0.1	0.05	7:hsa;hsa-mir-6874,49,71,-	0.0979713	0.0535376
hsa-miR-6820-3p	2	2	2	0.1	0.05	22:hsa;hsa-mir-6820,41,62,+	0.0979713	0.0535376
hsa-miR-4705	1	2	2	0.1	0.05	13:hsa;hsa-mir-4705,10,31,-	0.0979713	0.0535376
hsa-miR-519a-3p	1	2	1	0.1	0.05	19:hsa;hsa-mir-519a-1,53,74,+	0.0489857	0.0267688
hsa-miR-6797-3p	2	2	2	0.1	0.05	19:hsa;hsa-mir-6797,49,70,+	0.0979713	0.0535376
hsa-miR-548av-5p	2	2	2	0.1	0.05	18:hsa;hsa-mir-548av,1,18,-	0.0979713	0.0535376
hsa-miR-190a-3p	2	2	2	0.1	0.05	15:hsa;hsa-mir-190a,52,72,+	0.0979713	0.0535376
hsa-miR-3622a-3p	2	2	2	0.1	0.05	8:hsa;hsa-mir-3622a,50,71,+	0.0979713	0.0535376
hsa-miR-519a-3p	1	2	1	0.1	0.05	19:hsa;hsa-mir-519a-2,54,75,+	0.0489857	0.0267688
hsa-miR-6826-5p	2	2	2	0.1	0.05	3:hsa;hsa-mir-6826,6,28,+	0.0979713	0.0535376
hsa-miR-4723-5p	2	2	2	0.1	0.05	17:hsa;hsa-mir-4723,7,30,+	0.0979713	0.0535376
hsa-miR-3182	2	2	2	0.1	0.05	16:hsa;hsa-mir-3182,4,20,+	0.0979713	0.0535376
hsa-miR-4734	2	2	2	0.1	0.05	17:hsa;hsa-mir-4734,41,62,-	0.0979713	0.0535376
hsa-miR-6868-3p	2	2	2	0.1	0.05	17:hsa;hsa-mir-6868,38,58,-	0.0979713	0.0535376
hsa-miR-4690-5p	1	2	2	0.1	0.05	11:hsa;hsa-mir-4690,1,22,+	0.0979713	0.0535376
hsa-miR-517a-3p	2	2	1	0.1	0.05	19:hsa;hsa-mir-517a,54,75,+	0.0489857	0.0267688
hsa-miR-181d-3p	1	2	2	0.1	0.05	19:hsa;hsa-mir-181d,79,99,+	0.0979713	0.0535376
hsa-miR-3944-5p	2	2	2	0.1	0.05	10:hsa;hsa-mir-3944,23,43,-	0.0979713	0.0535376
hsa-miR-3692-5p	2	2	2	0.1	0.05	6:hsa;hsa-mir-3692,6,29,+	0.0979713	0.0535376
hsa-miR-3675-3p	2	2	1	0.1	0.05	1:hsa;hsa-mir-3675,43,64,-	0.0489857	0.0267688
hsa-miR-4802-5p	2	2	2	0.1	0.05	4:hsa;hsa-mir-4802,13,34,-	0.0979713	0.0535376
hsa-miR-6818-3p	1	2	2	0.1	0.05	22:hsa;hsa-mir-6818,44,65,+	0.0979713	0.0535376
hsa-miR-6819-5p	1	2	2	0.1	0.05	22:hsa;hsa-mir-6819,6,27,-	0.0979713	0.0535376
hsa-miR-6499-5p	1	2	2	0.1	0.05	5:hsa;hsa-mir-6499,5,26,-	0.0979713	0.0535376
hsa-miR-511-5p	1	2	2	0.1	0.05	10:hsa;hsa-mir-511,16,36,+	0.0979713	0.0535376
hsa-miR-3162-5p	1	1	1	0.05	0.03	11:hsa;hsa-mir-3162,10,32,-	0.0489857	0.0267688
hsa-miR-6859-5p	1	1	0.06	0.05	0.03	1:hsa;hsa-mir-6859-3,6,28,-	0.0030616	0.00167305
hsa-miR-873-5p	1	1	1	0.05	0.03	9:hsa;hsa-mir-873,11,31,-	0.0489857	0.0267688
hsa-miR-339-5p	1	1	1	0.05	0.03	7:hsa;hsa-mir-339,15,37,-	0.0489857	0.0267688
hsa-miR-1244	1	1	0.06	0.05	0.03	5:hsa;hsa-mir-1244-4,55,80,+	0.0030616	0.00167305
hsa-miR-6787-3p	1	1	1	0.05	0.03	17:hsa;hsa-mir-6787,40,61,+	0.0489857	0.0267688
hsa-miR-4786-3p	1	1	1	0.05	0.03	2:hsa;hsa-mir-4786,51,72,-	0.0489857	0.0267688
hsa-miR-601	1	1	1	0.05	0.03	9:hsa;hsa-mir-601,16,37,-	0.0489857	0.0267688
hsa-miR-6736-5p	1	1	1	0.05	0.03	1:hsa;hsa-mir-6736,6,26,-	0.0489857	0.0267688
hsa-miR-4670-5p	1	1	1	0.05	0.03	9:hsa;hsa-mir-4670,8,29,-	0.0489857	0.0267688
hsa-miR-509-5p	1	1	0.33	0.05	0.03	X:hsa;hsa-mir-509-2,20,40,-	0.0163286	0.00892294
hsa-miR-4657	1	1	1	0.05	0.03	7:hsa;hsa-mir-4657,1,23,-	0.0489857	0.0267688
hsa-miR-6862-5p	1	1	0.25	0.05	0.03	16:hsa;hsa-mir-6862-1,6,27,-	0.0122464	0.00669221
hsa-miR-6862-3p	1	1	0.25	0.05	0.03	16:hsa;hsa-mir-6862-1,45,68,-	0.0122464	0.00669221
hsa-miR-6783-5p	1	1	1	0.05	0.03	17:hsa;hsa-mir-6783,6,27,-	0.0489857	0.0267688
hsa-miR-1914-3p	1	1	1	0.05	0.03	20:hsa;hsa-mir-1914,50,71,-	0.0489857	0.0267688
hsa-miR-3150a-3p	1	1	1	0.05	0.03	8:hsa;hsa-mir-3150a,49,70,+	0.0489857	0.0267688
hsa-miR-1244	1	1	0.06	0.05	0.03	12:hsa;hsa-mir-1244-4,55,80,-	0.0030616	0.00167305
hsa-miR-6807-5p	1	1	1	0.05	0.03	19:hsa;hsa-mir-6807,1,22,+	0.0489857	0.0267688
hsa-miR-3180-5p	1	1	0.11	0.05	0.03	16:hsa;hsa-mir-3180-3,18,42,+	0.00544285	0.00297431
hsa-miR-6834-5p	1	1	1	0.05	0.03	6:hsa;hsa-mir-6834,1,21,+	0.0489857	0.0267688
hsa-miR-655-5p	1	1	1	0.05	0.03	14:hsa;hsa-mir-655,23,44,+	0.0489857	0.0267688
hsa-miR-6754-5p	1	1	1	0.05	0.03	11:hsa;hsa-mir-6754,6,27,+	0.0489857	0.0267688
hsa-miR-1244	1	1	0.06	0.05	0.03	12:hsa;hsa-mir-1244-1,55,80,-	0.0030616	0.00167305
hsa-miR-3910	1	1	0.5	0.05	0.03	9:hsa;hsa-mir-3910-2,50,69,-	0.0244928	0.0133844
hsa-miR-6764-3p	1	1	1	0.05	0.03	14:hsa;hsa-mir-6764,41,61,+	0.0489857	0.0267688
hsa-miR-6862-5p	1	1	0.25	0.05	0.03	16:hsa;hsa-mir-6862-1,6,27,+	0.0122464	0.00669221
hsa-miR-6862-3p	1	1	0.25	0.05	0.03	16:hsa;hsa-mir-6862-1,45,68,+	0.0122464	0.00669221
hsa-miR-6715b-3p	1	1	1	0.05	0.03	10:hsa;hsa-mir-6715b,46,67,-	0.0489857	0.0267688
hsa-miR-1178-3p	1	1	1	0.05	0.03	12:hsa;hsa-mir-1178,56,76,-	0.0489857	0.0267688
hsa-miR-5191	1	1	1	0.05	0.03	1:hsa;hsa-mir-5191,72,93,+	0.0489857	0.0267688
hsa-miR-632	1	1	1	0.05	0.03	17:hsa;hsa-mir-632,61,79,+	0.0489857	0.0267688
hsa-miR-6511a-3p	1	1	0.06	0.05	0.03	16:hsa;hsa-mir-6511a-1,44,65,-	0.0030616	0.00167305
hsa-miR-3613-3p	1	1	1	0.05	0.03	13:hsa;hsa-mir-3613,53,76,-	0.0489857	0.0267688
hsa-miR-6511a-3p	1	1	0.06	0.05	0.03	16:hsa;hsa-mir-6511a-1,44,65,+	0.0030616	0.00167305
hsa-miR-4429	1	1	1	0.05	0.03	2:hsa;hsa-mir-4429,7,26,-	0.0489857	0.0267688
hsa-miR-6511a-3p	1	1	0.06	0.05	0.03	16:hsa;hsa-mir-6511a-3,44,65,+	0.0030616	0.00167305
hsa-miR-3180-5p	1	1	0.11	0.05	0.03	16:hsa;hsa-mir-3180-1,18,42,-	0.00544285	0.00297431
hsa-miR-4489	1	1	1	0.05	0.03	11:hsa;hsa-mir-4489,6,26,+	0.0489857	0.0267688
hsa-miR-1237-3p	1	1	1	0.05	0.03	11:hsa;hsa-mir-1237,82,102,+	0.0489857	0.0267688
hsa-miR-3200-5p	1	1	1	0.05	0.03	22:hsa;hsa-mir-3200,13,34,+	0.0489857	0.0267688
hsa-miR-7703	1	1	1	0.05	0.03	14:hsa;hsa-mir-7703,55,77,-	0.0489857	0.0267688
hsa-miR-6511b-5p	1	1	0.25	0.05	0.03	16:hsa;hsa-mir-6511b-1,11,34,-	0.0122464	0.00669221
hsa-miR-1244	1	1	0.06	0.05	0.03	12:hsa;hsa-mir-1244-4,55,80,+	0.0030616	0.00167305
hsa-miR-499b-3p	1	1	1	0.05	0.03	20:hsa;hsa-mir-499b,46,67,-	0.0489857	0.0267688
hsa-miR-4700-5p	1	1	1	0.05	0.03	12:hsa;hsa-mir-4700,10,31,+	0.0489857	0.0267688
hsa-miR-1229-5p	1	1	1	0.05	0.03	5:hsa;hsa-mir-1229,1,24,-	0.0489857	0.0267688
hsa-miR-6859-5p	1	1	0.06	0.05	0.03	16:hsa;hsa-mir-6859-4,6,28,-	0.0030616	0.00167305
hsa-miR-135a-5p	1	1	0.5	0.05	0.03	3:hsa;hsa-mir-135a-1,17,39,-	0.0244928	0.0133844
hsa-miR-4695-5p	1	1	1	0.05	0.03	1:hsa;hsa-mir-4695,5,26,-	0.0489857	0.0267688
hsa-miR-6511a-3p	1	1	0.06	0.05	0.03	16:hsa;hsa-mir-6511a-4,44,65,+	0.0030616	0.00167305
hsa-miR-6862-5p	1	1	0.25	0.05	0.03	16:hsa;hsa-mir-6862-2,6,27,+	0.0122464	0.00669221
hsa-miR-6862-3p	1	1	0.25	0.05	0.03	16:hsa;hsa-mir-6862-2,45,68,+	0.0122464	0.00669221
hsa-miR-4720-5p	1	1	1	0.05	0.03	16:hsa;hsa-mir-4720,4,25,+	0.0489857	0.0267688
hsa-miR-6511b-5p	1	1	0.25	0.05	0.03	16:hsa;hsa-mir-6511b-2,6,29,-	0.0122464	0.00669221
hsa-miR-4424	1	1	1	0.05	0.03	1:hsa;hsa-mir-4424,15,36,+	0.0489857	0.0267688
hsa-miR-4699-5p	1	1	1	0.05	0.03	12:hsa;hsa-mir-4699,10,31,+	0.0489857	0.0267688
hsa-miR-548s	1	1	1	0.05	0.03	2:hsa;hsa-mir-548s,52,74,+	0.0489857	0.0267688
hsa-miR-6859-5p	1	1	0.06	0.05	0.03	15:hsa;hsa-mir-6859-4,6,28,+	0.0030616	0.00167305
hsa-miR-4753-5p	1	1	1	0.05	0.03	1:hsa;hsa-mir-4753,10,31,-	0.0489857	0.0267688
hsa-miR-578	1	1	1	0.05	0.03	4:hsa;hsa-mir-578,61,81,+	0.0489857	0.0267688
hsa-miR-653-5p	1	1	1	0.05	0.03	7:hsa;hsa-mir-653,13,33,-	0.0489857	0.0267688
hsa-miR-642b-3p	1	1	0.5	0.05	0.03	19:hsa;hsa-mir-642b,47,68,-	0.0244928	0.0133844
hsa-miR-1244	1	1	0.06	0.05	0.03	12:hsa;hsa-mir-1244-3,55,80,-	0.0030616	0.00167305
hsa-miR-3682-5p	1	1	1	0.05	0.03	2:hsa;hsa-mir-3682,15,36,-	0.0489857	0.0267688
hsa-miR-6862-5p	1	1	0.25	0.05	0.03	16:hsa;hsa-mir-6862-2,6,27,-	0.0122464	0.00669221
hsa-miR-6862-3p	1	1	0.25	0.05	0.03	16:hsa;hsa-mir-6862-2,45,68,-	0.0122464	0.00669221
hsa-miR-205-5p	1	1	1	0.05	0.03	1:hsa;hsa-mir-205,34,55,+	0.0489857	0.0267688
hsa-miR-6839-5p	1	1	1	0.05	0.03	7:hsa;hsa-mir-6839,6,27,+	0.0489857	0.0267688
hsa-miR-6796-5p	1	1	1	0.05	0.03	19:hsa;hsa-mir-6796,6,28,+	0.0489857	0.0267688
hsa-miR-1206	1	1	1	0.05	0.03	8:hsa;hsa-mir-1206,4,24,+	0.0489857	0.0267688
hsa-miR-3197	1	1	1	0.05	0.03	21:hsa;hsa-mir-3197,8,30,+	0.0489857	0.0267688
hsa-miR-622	1	1	1	0.05	0.03	13:hsa;hsa-mir-622,61,81,+	0.0489857	0.0267688
hsa-miR-3664-3p	1	1	1	0.05	0.03	11:hsa;hsa-mir-3664,59,80,-	0.0489857	0.0267688
hsa-miR-572	1	1	1	0.05	0.03	4:hsa;hsa-mir-572,61,80,+	0.0489857	0.0267688
hsa-miR-4799-5p	1	1	1	0.05	0.03	4:hsa;hsa-mir-4799,10,31,+	0.0489857	0.0267688
hsa-miR-6812-3p	1	1	1	0.05	0.03	20:hsa;hsa-mir-6812,44,64,+	0.0489857	0.0267688
hsa-miR-3607-5p	1	1	1	0.05	0.03	5:hsa;hsa-mir-3607,12,33,+	0.0489857	0.0267688
hsa-miR-7641	1	1	0.5	0.05	0.03	14:hsa;hsa-mir-7641-2,3,21,+	0.0244928	0.0133844
hsa-miR-4687-5p	1	1	1	0.05	0.03	11:hsa;hsa-mir-4687,12,33,+	0.0489857	0.0267688
hsa-miR-378g	1	1	1	0.05	0.03	1:hsa;hsa-mir-378g,2,21,-	0.0489857	0.0267688
hsa-miR-6859-5p	1	1	0.06	0.05	0.03	1:hsa;hsa-mir-6859-1,6,28,-	0.0030616	0.00167305
hsa-miR-1244	1	1	0.06	0.05	0.03	2:hsa;hsa-mir-1244-2,55,80,+	0.0030616	0.00167305
hsa-miR-6859-5p	1	1	0.06	0.05	0.03	1:hsa;hsa-mir-6859-3,6,28,-	0.0030616	0.00167305
hsa-miR-1244	1	1	0.06	0.05	0.03	2:hsa;hsa-mir-1244-4,55,80,+	0.0030616	0.00167305
hsa-miR-6859-5p	1	1	0.06	0.05	0.03	15:hsa;hsa-mir-6859-1,6,28,+	0.0030616	0.00167305
hsa-miR-6859-5p	1	1	0.06	0.05	0.03	1:hsa;hsa-mir-6859-2,6,28,-	0.0030616	0.00167305
hsa-miR-18b-3p	1	1	0.5	0.05	0.03	X:hsa;hsa-mir-18b,49,70,-	0.0244928	0.0133844
hsa-miR-7113-5p	1	1	1	0.05	0.03	11:hsa;hsa-mir-7113,2,22,+	0.0489857	0.0267688
hsa-miR-4747-5p	1	1	1	0.05	0.03	19:hsa;hsa-mir-4747,1,22,+	0.0489857	0.0267688
hsa-miR-4747-3p	1	1	1	0.05	0.03	19:hsa;hsa-mir-4747,33,54,+	0.0489857	0.0267688
hsa-miR-3922-3p	1	1	1	0.05	0.03	12:hsa;hsa-mir-3922,62,83,+	0.0489857	0.0267688
hsa-miR-6511a-3p	1	1	0.06	0.05	0.03	16:hsa;hsa-mir-6511a-1,44,65,+	0.0030616	0.00167305
hsa-miR-3180-5p	1	1	0.11	0.05	0.03	16:hsa;hsa-mir-3180-2,14,38,-	0.00544285	0.00297431
hsa-miR-4667-5p	1	1	1	0.05	0.03	9:hsa;hsa-mir-4667,3,24,+	0.0489857	0.0267688
hsa-miR-6511a-3p	1	1	0.06	0.05	0.03	16:hsa;hsa-mir-6511a-4,44,65,+	0.0030616	0.00167305
hsa-miR-6511a-3p	1	1	0.06	0.05	0.03	16:hsa;hsa-mir-6511a-2,44,65,-	0.0030616	0.00167305
hsa-miR-6769b-3p	1	1	1	0.05	0.03	1:hsa;hsa-mir-6769b,42,62,+	0.0489857	0.0267688
hsa-miR-516a-5p	1	1	0.5	0.05	0.03	19:hsa;hsa-mir-516a-2,16,38,+	0.0244928	0.0133844
hsa-miR-3675-5p	1	1	0.5	0.05	0.03	KI270714.1:hsa;hsa-mir-3675,12,34,+	0.0244928	0.0133844
hsa-miR-7641	1	1	0.5	0.05	0.03	11:hsa;hsa-mir-7641-1,7,25,+	0.0244928	0.0133844
hsa-miR-345-3p	1	1	1	0.05	0.03	14:hsa;hsa-mir-345,54,75,+	0.0489857	0.0267688
hsa-miR-6511a-3p	1	1	0.06	0.05	0.03	16:hsa;hsa-mir-6511a-4,44,65,+	0.0030616	0.00167305
hsa-miR-4784	1	1	1	0.05	0.03	2:hsa;hsa-mir-4784,10,29,-	0.0489857	0.0267688
hsa-miR-4671-3p	1	1	1	0.05	0.03	1:hsa;hsa-mir-4671,46,66,+	0.0489857	0.0267688
hsa-miR-6799-3p	1	1	1	0.05	0.03	19:hsa;hsa-mir-6799,47,69,+	0.0489857	0.0267688
hsa-miR-3158-5p	1	1	1	0.05	0.03	10:hsa;hsa-mir-3158-1,13,33,+	0.0489857	0.0267688
hsa-miR-3668	1	1	1	0.05	0.03	6:hsa;hsa-mir-3668,9,29,+	0.0489857	0.0267688
hsa-miR-3187-5p	1	1	1	0.05	0.03	19:hsa;hsa-mir-3187,7,29,+	0.0489857	0.0267688
hsa-miR-6859-5p	1	1	0.06	0.05	0.03	15:hsa;hsa-mir-6859-3,6,28,+	0.0030616	0.00167305
hsa-miR-7114-5p	1	1	1	0.05	0.03	9:hsa;hsa-mir-7114,6,26,-	0.0489857	0.0267688
hsa-miR-3180-5p	1	1	0.11	0.05	0.03	16:hsa;hsa-mir-3180-3,18,42,-	0.00544285	0.00297431
hsa-miR-637	1	1	1	0.05	0.03	19:hsa;hsa-mir-637,61,84,-	0.0489857	0.0267688
hsa-miR-4442	1	1	1	0.05	0.03	3:hsa;hsa-mir-4442,49,65,-	0.0489857	0.0267688
hsa-miR-7107-5p	1	1	1	0.05	0.03	12:hsa;hsa-mir-7107,6,27,-	0.0489857	0.0267688
hsa-miR-3122	1	1	1	0.05	0.03	1:hsa;hsa-mir-3122,10,31,+	0.0489857	0.0267688
hsa-miR-7156-5p	1	1	1	0.05	0.03	1:hsa;hsa-mir-7156,1,23,+	0.0489857	0.0267688
hsa-miR-602	1	1	1	0.05	0.03	9:hsa;hsa-mir-602,16,38,+	0.0489857	0.0267688
hsa-miR-4433b-3p	1	1	1	0.05	0.03	2:hsa;hsa-mir-4433b,60,80,-	0.0489857	0.0267688
hsa-miR-3920	1	1	1	0.05	0.03	11:hsa;hsa-mir-3920,51,72,-	0.0489857	0.0267688
hsa-miR-1244	1	1	0.06	0.05	0.03	5:hsa;hsa-mir-1244-1,55,80,+	0.0030616	0.00167305
hsa-miR-6766-3p	1	1	1	0.05	0.03	15:hsa;hsa-mir-6766,48,69,-	0.0489857	0.0267688
hsa-miR-5583-3p	1	1	0.5	0.05	0.03	18:hsa;hsa-mir-5583-1,38,59,+	0.0244928	0.0133844
hsa-miR-6511b-5p	1	1	0.25	0.05	0.03	16:hsa;hsa-mir-6511b-1,11,34,-	0.0122464	0.00669221
hsa-miR-6505-3p	1	1	1	0.05	0.03	12:hsa;hsa-mir-6505,51,71,+	0.0489857	0.0267688
hsa-miR-135a-5p	1	1	0.5	0.05	0.03	12:hsa;hsa-mir-135a-2,23,45,+	0.0244928	0.0133844
hsa-miR-1244	1	1	0.06	0.05	0.03	12:hsa;hsa-mir-1244-2,55,80,+	0.0030616	0.00167305
hsa-miR-6859-5p	1	1	0.06	0.05	0.03	16:hsa;hsa-mir-6859-2,6,28,-	0.0030616	0.00167305
hsa-miR-6511a-3p	1	1	0.06	0.05	0.03	16:hsa;hsa-mir-6511a-2,44,65,+	0.0030616	0.00167305
hsa-miR-3691-3p	1	1	1	0.05	0.03	6:hsa;hsa-mir-3691,56,77,-	0.0489857	0.0267688
hsa-miR-6886-5p	1	1	1	0.05	0.03	19:hsa;hsa-mir-6886,6,26,+	0.0489857	0.0267688
hsa-miR-95-3p	1	1	1	0.05	0.03	4:hsa;hsa-mir-95,49,70,-	0.0489857	0.0267688
hsa-miR-7109-5p	1	1	1	0.05	0.03	22:hsa;hsa-mir-7109,6,26,-	0.0489857	0.0267688
hsa-miR-6511a-3p	1	1	0.06	0.05	0.03	16:hsa;hsa-mir-6511a-2,44,65,+	0.0030616	0.00167305
hsa-miR-6511a-3p	1	1	0.06	0.05	0.03	16:hsa;hsa-mir-6511a-1,44,65,+	0.0030616	0.00167305
hsa-miR-216a-5p	1	1	1	0.05	0.03	2:hsa;hsa-mir-216a,19,40,-	0.0489857	0.0267688
hsa-miR-6859-5p	1	1	0.06	0.05	0.03	1:hsa;hsa-mir-6859-4,6,28,-	0.0030616	0.00167305
hsa-miR-1252-3p	1	1	1	0.05	0.03	12:hsa;hsa-mir-1252,40,61,+	0.0489857	0.0267688
hsa-miR-1244	1	1	0.06	0.05	0.03	2:hsa;hsa-mir-1244-1,55,80,+	0.0030616	0.00167305
hsa-miR-3917	1	1	1	0.05	0.03	1:hsa;hsa-mir-3917,52,71,-	0.0489857	0.0267688
hsa-miR-6751-5p	1	1	1	0.05	0.03	11:hsa;hsa-mir-6751,6,28,-	0.0489857	0.0267688
hsa-miR-186-3p	1	1	1	0.05	0.03	1:hsa;hsa-mir-186,54,75,-	0.0489857	0.0267688
hsa-miR-3928-5p	1	1	1	0.05	0.03	22:hsa;hsa-mir-3928,3,25,-	0.0489857	0.0267688
hsa-miR-6816-5p	1	1	1	0.05	0.03	22:hsa;hsa-mir-6816,6,26,-	0.0489857	0.0267688
hsa-miR-188-3p	1	1	1	0.05	0.03	X:hsa;hsa-mir-188,54,74,+	0.0489857	0.0267688
hsa-miR-7973	1	1	1	0.05	0.03	15:hsa;hsa-mir-7973-1,1,20,+	0.0489857	0.0267688
hsa-miR-548ar-3p	1	1	1	0.05	0.03	13:hsa;hsa-mir-548ar,37,57,+	0.0489857	0.0267688
hsa-miR-5006-5p	1	1	1	0.05	0.03	13:hsa;hsa-mir-5006,21,41,-	0.0489857	0.0267688
hsa-miR-5006-3p	1	1	1	0.05	0.03	13:hsa;hsa-mir-5006,70,90,-	0.0489857	0.0267688
hsa-miR-3678-3p	1	1	1	0.05	0.03	17:hsa;hsa-mir-3678,69,90,+	0.0489857	0.0267688
hsa-miR-1244	1	1	0.06	0.05	0.03	2:hsa;hsa-mir-1244-3,55,80,+	0.0030616	0.00167305
hsa-miR-3910	1	1	0.5	0.05	0.03	9:hsa;hsa-mir-3910-1,63,82,+	0.0244928	0.0133844
hsa-miR-551b-3p	1	1	1	0.05	0.03	3:hsa;hsa-mir-551b,61,81,+	0.0489857	0.0267688
hsa-miR-4425	1	1	1	0.05	0.03	1:hsa;hsa-mir-4425,50,71,+	0.0489857	0.0267688
hsa-miR-5089-3p	1	1	1	0.05	0.03	17:hsa;hsa-mir-5089,53,75,+	0.0489857	0.0267688
hsa-miR-4533	1	1	1	0.05	0.03	20:hsa;hsa-mir-4533,9,30,+	0.0489857	0.0267688
hsa-miR-675-5p	1	1	0.5	0.05	0.03	11:hsa;hsa-mir-675,10,32,-	0.0244928	0.0133844
hsa-miR-675-3p	1	1	0.5	0.05	0.03	11:hsa;hsa-mir-675,45,64,-	0.0244928	0.0133844
hsa-miR-6511b-5p	1	1	0.25	0.05	0.03	16:hsa;hsa-mir-6511b-2,6,29,-	0.0122464	0.00669221
hsa-miR-6733-3p	1	1	1	0.05	0.03	1:hsa;hsa-mir-6733,42,61,-	0.0489857	0.0267688
hsa-miR-6854-3p	1	1	1	0.05	0.03	9:hsa;hsa-mir-6854,49,69,-	0.0489857	0.0267688
hsa-miR-5580-3p	1	1	1	0.05	0.03	14:hsa;hsa-mir-5580,37,58,-	0.0489857	0.0267688
hsa-miR-1244	1	1	0.06	0.05	0.03	12:hsa;hsa-mir-1244-3,55,80,+	0.0030616	0.00167305
hsa-miR-6859-5p	1	1	0.06	0.05	0.03	1:hsa;hsa-mir-6859-4,6,28,-	0.0030616	0.00167305
hsa-miR-3134	1	1	1	0.05	0.03	3:hsa;hsa-mir-3134,45,67,-	0.0489857	0.0267688
hsa-miR-6859-5p	1	1	0.06	0.05	0.03	15:hsa;hsa-mir-6859-2,6,28,+	0.0030616	0.00167305
hsa-miR-6871-5p	1	1	1	0.05	0.03	20:hsa;hsa-mir-6871,6,27,+	0.0489857	0.0267688
hsa-miR-6511a-3p	1	1	0.06	0.05	0.03	16:hsa;hsa-mir-6511a-3,44,65,+	0.0030616	0.00167305
hsa-miR-5194	1	1	1	0.05	0.03	8:hsa;hsa-mir-5194,73,94,-	0.0489857	0.0267688
hsa-miR-4755-3p	1	1	1	0.05	0.03	20:hsa;hsa-mir-4755,44,65,+	0.0489857	0.0267688
hsa-miR-6729-5p	1	1	1	0.05	0.03	1:hsa;hsa-mir-6729,6,27,+	0.0489857	0.0267688
hsa-miR-3124-3p	1	1	1	0.05	0.03	1:hsa;hsa-mir-3124,42,63,+	0.0489857	0.0267688
hsa-miR-1244	1	1	0.06	0.05	0.03	5:hsa;hsa-mir-1244-3,55,80,+	0.0030616	0.00167305
hsa-miR-1180-5p	1	1	1	0.05	0.03	17:hsa;hsa-mir-1180,7,27,-	0.0489857	0.0267688
hsa-miR-6506-5p	1	1	1	0.05	0.03	16:hsa;hsa-mir-6506,2,24,-	0.0489857	0.0267688
hsa-miR-4804-3p	1	1	1	0.05	0.03	5:hsa;hsa-mir-4804,45,65,+	0.0489857	0.0267688
hsa-miR-6798-5p	1	1	1	0.05	0.03	19:hsa;hsa-mir-6798,6,28,+	0.0489857	0.0267688
hsa-miR-302d-3p	1	1	1	0.05	0.03	4:hsa;hsa-mir-302d,44,66,-	0.0489857	0.0267688
hsa-miR-206	1	1	1	0.05	0.03	6:hsa;hsa-mir-206,53,74,+	0.0489857	0.0267688
hsa-miR-6511a-3p	1	1	0.06	0.05	0.03	16:hsa;hsa-mir-6511a-3,44,65,+	0.0030616	0.00167305
hsa-miR-3659	1	1	1	0.05	0.03	1:hsa;hsa-mir-3659,59,79,+	0.0489857	0.0267688
hsa-miR-1244	1	1	0.06	0.05	0.03	12:hsa;hsa-mir-1244-2,55,80,-	0.0030616	0.00167305
hsa-miR-3195	1	1	1	0.05	0.03	20:hsa;hsa-mir-3195,11,27,+	0.0489857	0.0267688
hsa-miR-6878-5p	1	1	1	0.05	0.03	1:hsa;hsa-mir-6878,6,28,+	0.0489857	0.0267688
hsa-miR-3652	1	1	1	0.05	0.03	12:hsa;hsa-mir-3652,1,18,+	0.0489857	0.0267688
hsa-miR-4770	1	1	1	0.05	0.03	X:hsa;hsa-mir-4770,40,57,-	0.0489857	0.0267688
hsa-miR-219b-3p	1	1	1	0.05	0.03	9:hsa;hsa-mir-219b,56,78,+	0.0489857	0.0267688
hsa-miR-6511a-3p	1	1	0.06	0.05	0.03	16:hsa;hsa-mir-6511a-3,44,65,-	0.0030616	0.00167305
hsa-miR-3144-3p	1	1	1	0.05	0.03	6:hsa;hsa-mir-3144,48,69,+	0.0489857	0.0267688
hsa-miR-5587-5p	1	1	1	0.05	0.03	16:hsa;hsa-mir-5587,1,18,+	0.0489857	0.0267688
hsa-miR-448	1	1	1	0.05	0.03	X:hsa;hsa-mir-448,71,92,+	0.0489857	0.0267688
hsa-miR-1231	1	1	1	0.05	0.03	1:hsa;hsa-mir-1231,5,24,+	0.0489857	0.0267688
hsa-miR-6511a-3p	1	1	0.06	0.05	0.03	16:hsa;hsa-mir-6511a-4,44,65,-	0.0030616	0.00167305
hsa-miR-6884-3p	1	1	1	0.05	0.03	17:hsa;hsa-mir-6884,54,76,-	0.0489857	0.0267688
hsa-miR-6823-5p	1	1	1	0.05	0.03	3:hsa;hsa-mir-6823,6,26,-	0.0489857	0.0267688
hsa-miR-585-5p	1	1	1	0.05	0.03	5:hsa;hsa-mir-585,25,46,-	0.0489857	0.0267688
hsa-miR-4731-3p	1	1	1	0.05	0.03	17:hsa;hsa-mir-4731,42,63,-	0.0489857	0.0267688
hsa-miR-676-5p	1	1	1	0.05	0.03	X:hsa;hsa-mir-676,8,28,+	0.0489857	0.0267688
hsa-miR-3180-5p	1	1	0.11	0.05	0.03	16:hsa;hsa-mir-3180-2,14,38,+	0.00544285	0.00297431
hsa-miR-19b-2-5p	1	1	1	0.05	0.03	X:hsa;hsa-mir-19b-2,19,40,-	0.0489857	0.0267688
hsa-miR-5090	1	1	1	0.05	0.03	7:hsa;hsa-mir-5090,11,33,+	0.0489857	0.0267688
hsa-miR-4715-3p	1	1	1	0.05	0.03	15:hsa;hsa-mir-4715,46,68,-	0.0489857	0.0267688
hsa-miR-5693	1	1	1	0.05	0.03	13:hsa;hsa-mir-5693,43,64,-	0.0489857	0.0267688
hsa-miR-133b	1	1	1	0.05	0.03	6:hsa;hsa-mir-133b,66,87,+	0.0489857	0.0267688
hsa-miR-6789-5p	1	1	1	0.05	0.03	19:hsa;hsa-mir-6789,5,28,-	0.0489857	0.0267688
hsa-miR-6789-3p	1	1	1	0.05	0.03	19:hsa;hsa-mir-6789,78,98,-	0.0489857	0.0267688
hsa-miR-6775-3p	1	1	1	0.05	0.03	16:hsa;hsa-mir-6775,49,69,-	0.0489857	0.0267688
hsa-miR-516a-5p	1	1	0.5	0.05	0.03	19:hsa;hsa-mir-516a-1,16,38,+	0.0244928	0.0133844
hsa-miR-6859-5p	1	1	0.06	0.05	0.03	16:hsa;hsa-mir-6859-1,6,28,-	0.0030616	0.00167305
hsa-miR-3180-5p	1	1	0.11	0.05	0.03	16:hsa;hsa-mir-3180-3,18,42,+	0.00544285	0.00297431
hsa-miR-1266-5p	1	1	1	0.05	0.03	15:hsa;hsa-mir-1266,13,35,-	0.0489857	0.0267688
hsa-miR-374c-3p	1	1	0.5	0.05	0.03	X:hsa;hsa-mir-374c,39,60,+	0.0244928	0.0133844
hsa-miR-5008-5p	1	1	1	0.05	0.03	1:hsa;hsa-mir-5008,22,43,-	0.0489857	0.0267688
hsa-miR-5008-3p	1	1	1	0.05	0.03	1:hsa;hsa-mir-5008,54,74,-	0.0489857	0.0267688
hsa-miR-4764-5p	1	1	1	0.05	0.03	22:hsa;hsa-mir-4764,10,30,-	0.0489857	0.0267688
hsa-miR-658	1	1	1	0.05	0.03	22:hsa;hsa-mir-658,61,85,-	0.0489857	0.0267688
hsa-miR-509-5p	1	1	0.33	0.05	0.03	X:hsa;hsa-mir-509-1,20,40,-	0.0163286	0.00892294
hsa-miR-3132	1	1	1	0.05	0.03	2:hsa;hsa-mir-3132,8,31,-	0.0489857	0.0267688
hsa-miR-5691	1	1	1	0.05	0.03	11:hsa;hsa-mir-5691,9,30,-	0.0489857	0.0267688
hsa-miR-1244	1	1	0.06	0.05	0.03	12:hsa;hsa-mir-1244-1,55,80,+	0.0030616	0.00167305
hsa-miR-3679-3p	1	1	1	0.05	0.03	2:hsa;hsa-mir-3679,44,65,+	0.0489857	0.0267688
hsa-miR-1246	1	1	1	0.05	0.03	2:hsa;hsa-mir-1246,11,29,-	0.0489857	0.0267688
hsa-miR-1292-3p	1	1	1	0.05	0.03	20:hsa;hsa-mir-1292,43,62,+	0.0489857	0.0267688
hsa-miR-6761-5p	1	1	1	0.05	0.03	12:hsa;hsa-mir-6761,6,26,+	0.0489857	0.0267688
hsa-miR-4730	1	1	1	0.05	0.03	17:hsa;hsa-mir-4730,10,32,+	0.0489857	0.0267688
hsa-miR-4530	1	1	1	0.05	0.03	19:hsa;hsa-mir-4530,33,50,-	0.0489857	0.0267688
hsa-miR-3180-5p	1	1	0.11	0.05	0.03	16:hsa;hsa-mir-3180-1,18,42,+	0.00544285	0.00297431
hsa-miR-509-5p	1	1	0.33	0.05	0.03	X:hsa;hsa-mir-509-2,20,40,-	0.0163286	0.00892294
hsa-miR-3180-5p	1	1	0.11	0.05	0.03	16:hsa;hsa-mir-3180-2,14,38,+	0.00544285	0.00297431
hsa-miR-583	1	1	1	0.05	0.03	5:hsa;hsa-mir-583,16,36,+	0.0489857	0.0267688
hsa-miR-6857-5p	1	1	1	0.05	0.03	X:hsa;hsa-mir-6857,6,27,-	0.0489857	0.0267688
hsa-miR-4714-3p	1	1	1	0.05	0.03	15:hsa;hsa-mir-4714,48,69,+	0.0489857	0.0267688
hsa-miR-639	1	1	1	0.05	0.03	19:hsa;hsa-mir-639,61,83,+	0.0489857	0.0267688
hsa-miR-3149	1	1	1	0.05	0.03	8:hsa;hsa-mir-3149,51,73,-	0.0489857	0.0267688
hsa-miR-6859-5p	1	1	0.06	0.05	0.03	1:hsa;hsa-mir-6859-1,6,28,-	0.0030616	0.00167305
hsa-miR-149-3p	1	1	1	0.05	0.03	2:hsa;hsa-mir-149,56,76,+	0.0489857	0.0267688
hsa-miR-1909-5p	1	1	1	0.05	0.03	19:hsa;hsa-mir-1909,16,36,-	0.0489857	0.0267688
hsa-miR-6859-5p	1	1	0.06	0.05	0.03	1:hsa;hsa-mir-6859-2,6,28,-	0.0030616	0.00167305
hsa-miR-5583-3p	1	1	0.5	0.05	0.03	18:hsa;hsa-mir-5583-2,38,59,-	0.0244928	0.0133844
hsa-miR-4666a-5p	1	1	1	0.05	0.03	1:hsa;hsa-mir-4666a,10,30,+	0.0489857	0.0267688
hsa-miR-3163	1	1	1	0.05	0.03	11:hsa;hsa-mir-3163,10,31,-	0.0489857	0.0267688
hsa-miR-6739-3p	1	1	1	0.05	0.03	1:hsa;hsa-mir-6739,55,75,+	0.0489857	0.0267688
hsa-miR-6504-5p	1	1	1	0.05	0.03	16:hsa;hsa-mir-6504,5,25,+	0.0489857	0.0267688
hsa-miR-937-5p	1	1	1	0.05	0.03	8:hsa;hsa-mir-937,14,33,-	0.0489857	0.0267688
hsa-miR-6511a-3p	1	1	0.06	0.05	0.03	16:hsa;hsa-mir-6511a-2,44,65,+	0.0030616	0.00167305
hsa-miR-6737-5p	1	1	1	0.05	0.03	1:hsa;hsa-mir-6737,6,26,-	0.0489857	0.0267688
hsa-miR-6874-5p	1	1	1	0.05	0.03	7:hsa;hsa-mir-6874,6,28,-	0.0489857	0.0267688
hsa-miR-4766-5p	1	1	1	0.05	0.03	22:hsa;hsa-mir-4766,12,32,-	0.0489857	0.0267688
hsa-miR-4766-3p	1	1	1	0.05	0.03	22:hsa;hsa-mir-4766,46,66,-	0.0489857	0.0267688
hsa-miR-3934-5p	1	1	1	0.05	0.03	6:hsa;hsa-mir-3934,25,46,+	0.0489857	0.0267688
hsa-miR-6820-5p	1	1	1	0.05	0.03	22:hsa;hsa-mir-6820,6,24,+	0.0489857	0.0267688
hsa-miR-656-5p	1	1	1	0.05	0.03	14:hsa;hsa-mir-656,8,28,+	0.0489857	0.0267688
hsa-miR-1827	1	1	0.33	0.05	0.03	12:hsa;hsa-mir-1827,49,66,+	0.0163286	0.00892294
hsa-miR-4779	1	1	1	0.05	0.03	2:hsa;hsa-mir-4779,51,72,-	0.0489857	0.0267688
hsa-miR-202-5p	1	1	1	0.05	0.03	10:hsa;hsa-mir-202,28,49,-	0.0489857	0.0267688
hsa-miR-4674	1	1	1	0.05	0.03	9:hsa;hsa-mir-4674,58,78,-	0.0489857	0.0267688
hsa-miR-3151-5p	1	1	1	0.05	0.03	8:hsa;hsa-mir-3151,10,30,+	0.0489857	0.0267688
hsa-miR-323b-5p	1	1	1	0.05	0.03	14:hsa;hsa-mir-323b,15,37,+	0.0489857	0.0267688
hsa-miR-1244	1	1	0.06	0.05	0.03	5:hsa;hsa-mir-1244-2,55,80,+	0.0030616	0.00167305
hsa-miR-6859-5p	1	1	0.06	0.05	0.03	16:hsa;hsa-mir-6859-3,6,28,-	0.0030616	0.00167305
hsa-miR-6793-5p	1	1	1	0.05	0.03	19:hsa;hsa-mir-6793,6,27,+	0.0489857	0.0267688
hsa-miR-6793-3p	1	1	1	0.05	0.03	19:hsa;hsa-mir-6793,44,63,+	0.0489857	0.0267688
hsa-miR-6875-5p	1	1	1	0.05	0.03	7:hsa;hsa-mir-6875,6,26,+	0.0489857	0.0267688
hsa-miR-130a-5p	1	1	1	0.05	0.03	11:hsa;hsa-mir-130a,21,42,+	0.0489857	0.0267688
hsa-miR-4522	1	1	1	0.05	0.03	17:hsa;hsa-mir-4522,55,75,-	0.0489857	0.0267688
hsa-miR-6849-3p	1	1	1	0.05	0.03	8:hsa;hsa-mir-6849,48,69,-	0.0489857	0.0267688
hsa-miR-4782-5p	1	1	1	0.05	0.03	2:hsa;hsa-mir-4782,10,31,-	0.0489857	0.0267688
hsa-miR-4782-3p	1	1	1	0.05	0.03	2:hsa;hsa-mir-4782,50,71,-	0.0489857	0.0267688
hsa-miR-4704-5p	1	1	1	0.05	0.03	13:hsa;hsa-mir-4704,10,31,+	0.0489857	0.0267688
hsa-miR-675-5p	1	1	0.5	0.05	0.03	KI270721.1:hsa;hsa-mir-675,10,32,-	0.0244928	0.0133844
hsa-miR-675-3p	1	1	0.5	0.05	0.03	KI270721.1:hsa;hsa-mir-675,45,64,-	0.0244928	0.0133844
hsa-miR-3675-5p	1	1	0.5	0.05	0.03	1:hsa;hsa-mir-3675,12,34,-	0.0244928	0.0133844
hsa-miR-20b-3p	1	1	1	0.05	0.03	X:hsa;hsa-mir-20b,44,65,-	0.0489857	0.0267688
hsa-miR-3180-5p	1	1	0.11	0.05	0.03	16:hsa;hsa-mir-3180-1,18,42,+	0.00544285	0.00297431
hsa-miR-203b-3p	1	1	1	0.05	0.03	14:hsa;hsa-mir-203b,54,76,-	0.0489857	0.0267688
hsa-miR-6837-5p	1	1	1	0.05	0.03	7:hsa;hsa-mir-6837,6,26,+	0.0489857	0.0267688
hsa-miR-6803-3p	1	1	1	0.05	0.03	19:hsa;hsa-mir-6803,44,65,-	0.0489857	0.0267688

## Sheet: mock-hsv1
Table S2: Human (hsa-) and herpes simplex virus 1 (hsv1-) mature miRNAs detected in mock samples, and at 8 h.p.i., and 18 h.p.i.
HFF mock - HSV-1 miRNAs
name	unique reads	read count	read count (mult. map. adj.)	RPM (lib)	RPM (total)	coordinateString	RPM_adj (lib)	RPM_adj (total)
hsv1-miR-H6-3p	31	73	36.5	3.58	1.95	JQ673480:hsv1;hsv1-mir-H6,54,74,-	1.78798	0.977062
hsv1-miR-H6-3p	31	73	36.5	3.58	1.95	JQ673480:hsv1;hsv1-mir-H6,54,74,+	1.78798	0.977062
hsv1-miR-H15	1	12	6	0.59	0.32	JQ673480:hsv1;hsv1-mir-H15,62,83,+	0.293914	0.160613
hsv1-miR-H15	1	12	6	0.59	0.32	JQ673480:hsv1;hsv1-mir-H15,62,83,-	0.293914	0.160613
hsv1-miR-H4-3p	7	10	5	0.49	0.27	JQ673480:hsv1;hsv1-mir-H4,54,75,+	0.244928	0.133844
hsv1-miR-H4-3p	7	10	5	0.49	0.27	JQ673480:hsv1;hsv1-mir-H4,54,75,-	0.244928	0.133844
hsv1-miR-H17a	4	8	2	0.39	0.21	JQ673480:hsv1;hsv1-mir-H17a,63,83,-	0.0979713	0.0535376
hsv1-miR-H17	4	8	2	0.39	0.21	JQ673480:hsv1;hsv1-mir-H17a,63,83,-	0.0979713	0.0535376
hsv1-miR-H1-5p	8	8	4	0.39	0.21	JQ673480:hsv1;hsv1-mir-H1,15,35,+	0.195943	0.107075
hsv1-miR-H17a	4	8	2	0.39	0.21	JQ673480:hsv1;hsv1-mir-H17a,63,83,+	0.0979713	0.0535376
hsv1-miR-H17	4	8	2	0.39	0.21	JQ673480:hsv1;hsv1-mir-H17a,63,83,+	0.0979713	0.0535376
hsv1-miR-H1-5p	8	8	4	0.39	0.21	JQ673480:hsv1;hsv1-mir-H1,15,35,-	0.195943	0.107075
hsv1-miR-H2-3p	4	4	2	0.2	0.11	JQ673480:hsv1;hsv1-mir-H2,47,70,-	0.0979713	0.0535376
hsv1-miR-H1-3p	4	4	2	0.2	0.11	JQ673480:hsv1;hsv1-mir-H1,53,75,+	0.0979713	0.0535376
hsv1-miR-H2-3p	4	4	2	0.2	0.11	JQ673480:hsv1;hsv1-mir-H2,47,70,+	0.0979713	0.0535376
hsv1-miR-H1-3p	4	4	2	0.2	0.11	JQ673480:hsv1;hsv1-mir-H1,53,75,-	0.0979713	0.0535376
hsv1-mir-H28	1	1	0.25	0.05	0.03	JQ673480:hsv1;hsv1-mir-H28,13,30,+	0.0122464	0.00669221
hsv1-mir-H28a	1	1	0.25	0.05	0.03	JQ673480:hsv1;hsv1-mir-H28,13,30,+	0.0122464	0.00669221
hsv1-miR-H2-5p	1	1	0.5	0.05	0.03	JQ673480:hsv1;hsv1-mir-H2,8,29,-	0.0244928	0.0133844
hsv1-miR-H11	1	1	0.5	0.05	0.03	JQ673480:hsv1;hsv1-mir-H11,73,92,-	0.0244928	0.0133844
hsv1-miR-H7-3p	1	1	0.5	0.05	0.03	JQ673480:hsv1;hsv1-mir-H7,51,71,+	0.0244928	0.0133844
hsv1-miR-H7-3p	1	1	0.5	0.05	0.03	JQ673480:hsv1;hsv1-mir-H7,51,71,-	0.0244928	0.0133844
hsv1-miR-H2-5p	1	1	0.5	0.05	0.03	JQ673480:hsv1;hsv1-mir-H2,8,29,+	0.0244928	0.0133844
hsv1-miR-H11	1	1	0.5	0.05	0.03	JQ673480:hsv1;hsv1-mir-H11,73,92,+	0.0244928	0.0133844
hsv1-miR-H8a-3p	1	1	0.25	0.05	0.03	JQ673480:hsv1;hsv1-mir-H8a,48,67,-	0.0122464	0.00669221
hsv1-miR-H8-3p	1	1	0.25	0.05	0.03	JQ673480:hsv1;hsv1-mir-H8a,48,67,-	0.0122464	0.00669221
hsv1-mir-H28	1	1	0.25	0.05	0.03	JQ673480:hsv1;hsv1-mir-H28a,13,30,+	0.0122464	0.00669221
hsv1-mir-H28a	1	1	0.25	0.05	0.03	JQ673480:hsv1;hsv1-mir-H28a,13,30,+	0.0122464	0.00669221
hsv1-miR-H27	1	1	0.5	0.05	0.03	JQ673480:hsv1;hsv1-mir-H27,59,81,-	0.0244928	0.0133844
hsv1-miR-H27	1	1	0.5	0.05	0.03	JQ673480:hsv1;hsv1-mir-H27,59,81,+	0.0244928	0.0133844
hsv1-miR-H8a-3p	1	1	0.25	0.05	0.03	JQ673480:hsv1;hsv1-mir-H8a,48,67,+	0.0122464	0.00669221
hsv1-miR-H8-3p	1	1	0.25	0.05	0.03	JQ673480:hsv1;hsv1-mir-H8a,48,67,+	0.0122464	0.00669221

## Sheet: 8hpi-all
Table S2: Human (hsa-) and herpes simplex virus 1 (hsv1-) mature miRNAs detected in mock samples, and at 8 h.p.i., and 18 h.p.i.
HFF 8 h.p.i. - all miRNAs
name	unique reads	read count	read count (mult. map. adj.)	RPM (lib)	RPM (total)	coordinateString	RPM_adj (lib)	RPM_adj (total)
hsa-miR-21-5p	6258	12532937	12532937	390016	279598	17:hsa;hsa-mir-21,8,29,+	390016	279598
hsa-miR-100-5p	2807	2783185	2.77765e+06	86610.7	62090.2	11:hsa;hsa-mir-100,13,34,-	86438.5	61966.8
hsa-miR-143-3p	3269	2033418	2033418	63278.5	45363.6	5:hsa;hsa-mir-143,61,81,+	63278.5	45363.6
hsa-let-7i-5p	2431	1570436	1568214	48870.8	35034.9	12:hsa;hsa-let-7i,6,27,+	48801.7	34985.4
hsa-miR-199a-3p	3771	1103180	368623	34330.2	24610.9	1:hsa;hsa-mir-199a-2,70,91,-	11471.3	8223.64
hsa-miR-199b-3p	3731	1102172	367469	34298.8	24588.4	9:hsa;hsa-mir-199b,65,86,-	11435.4	8197.89
hsa-miR-199a-3p	3671	1102097	367414	34296.4	24586.7	19:hsa;hsa-mir-199a-1,47,68,-	11433.7	8196.66
hsa-let-7f-5p	1397	955595	485289	29737.4	21318.4	X:hsa;hsa-let-7f-2,8,29,-	15101.8	10826.3
hsa-let-7f-5p	1323	940667	470413	29272.9	20985.4	9:hsa;hsa-let-7f-1,7,28,+	14638.9	10494.5
hsa-miR-27b-3p	1724	681332	675066	21202.5	15199.9	9:hsa;hsa-mir-27b,61,81,+	21007.5	15060.1
hsa-miR-30a-5p	2541	663592	663264	20650.5	14804.1	6:hsa;hsa-mir-30a,6,27,-	20640.3	14796.8
hsa-miR-221-3p	3178	545037	545037	16961.2	12159.3	X:hsa;hsa-mir-221,65,87,-	16961.2	12159.3
hsa-miR-199a-5p	1806	519952	259479	16180.5	11599.6	19:hsa;hsa-mir-199a-1,6,28,-	8074.79	5788.73
hsa-miR-199a-5p	1805	519933	259460	16179.9	11599.2	1:hsa;hsa-mir-199a-2,31,53,-	8074.2	5788.3
hsa-let-7g-5p	1356	495544	489643	15421	11055.1	3:hsa;hsa-let-7g,5,26,-	15237.3	10923.5
hsa-let-7a-5p	1248	493283	164431	15350.6	11004.7	22:hsa;hsa-let-7a-3,4,25,+	5116.99	3668.31
hsa-let-7a-5p	1230	492974	164115	15341	10997.8	9:hsa;hsa-let-7a-1,6,27,+	5107.15	3661.26
hsa-let-7a-5p	1198	492777	163919	15334.9	10993.4	11:hsa;hsa-let-7a-2,5,26,-	5101.04	3656.88
hsa-miR-26a-5p	1611	474587	237567	14768.8	10587.6	12:hsa;hsa-mir-26a-2,14,35,-	7392.91	5299.89
hsa-miR-26a-5p	1574	474212	237192	14757.1	10579.2	3:hsa;hsa-mir-26a-1,10,31,+	7381.24	5291.53
hsa-miR-222-3p	3271	460222	460222	14321.8	10267.1	X:hsa;hsa-mir-222,69,89,-	14321.8	10267.1
hsa-miR-148a-3p	916	399179	398386	12422.2	8905.3	7:hsa;hsa-mir-148a,44,65,-	12397.5	8887.6
hsa-miR-199b-5p	1466	355967	353866	11077.4	7941.29	9:hsa;hsa-mir-199b,26,48,-	11012.1	7894.42
hsa-miR-22-3p	965	319193	319193	9933.05	7120.89	17:hsa;hsa-mir-22,53,74,-	9933.05	7120.89
hsa-miR-30d-5p	1801	291555	291025	9072.98	6504.31	8:hsa;hsa-mir-30d,6,27,-	9056.5	6492.5
hsa-miR-29a-3p	1762	288366	288238	8973.74	6433.17	7:hsa;hsa-mir-29a,42,63,-	8969.77	6430.32
hsa-miR-27a-3p	2316	277401	271134	8632.52	6188.55	19:hsa;hsa-mir-27a,51,71,-	8437.51	6048.75
hsa-miR-7-5p	1222	268375	91287.5	8351.63	5987.19	9:hsa;hsa-mir-7-1,24,46,-	2840.8	2036.54
hsa-miR-7-5p	1205	266487	89399.5	8292.88	5945.07	15:hsa;hsa-mir-7-2,32,54,+	2782.05	1994.42
hsa-miR-7-5p	1172	266224	89138	8284.7	5939.2	19:hsa;hsa-mir-7-3,31,53,+	2773.91	1988.58
hsa-miR-125b-5p	1533	256946	134878	7995.97	5732.22	11:hsa;hsa-mir-125b-1,15,36,-	4197.29	3008.99
hsa-miR-125b-5p	1451	251005	128936	7811.09	5599.68	21:hsa;hsa-mir-125b-2,17,38,+	4012.41	2876.45
hsa-miR-127-3p	2260	242279	242279	7539.55	5405.01	14:hsa;hsa-mir-127,57,78,+	7539.55	5405.01
hsa-miR-24-3p	1102	212255	106847	6605.22	4735.21	9:hsa;hsa-mir-24-1,44,65,+	3325	2383.66
hsa-miR-24-3p	1026	210999	105591	6566.13	4707.19	19:hsa;hsa-mir-24-2,50,71,-	3285.91	2355.63
hsa-let-7b-5p	1780	199907	198477	6220.96	4459.74	22:hsa;hsa-let-7b,6,27,+	6176.45	4427.82
hsa-miR-103a-3p	1484	172184	85378	5358.24	3841.26	20:hsa;hsa-mir-103a-2,48,70,+	2656.9	1904.7
hsa-miR-103a-3p	1431	171216	84412.5	5328.12	3819.67	5:hsa;hsa-mir-103a-1,48,70,-	2626.86	1883.16
hsa-miR-381-3p	793	169255	169253	5267.09	3775.92	14:hsa;hsa-mir-381,49,70,+	5267.03	3775.87
hsa-miR-99b-5p	1127	148579	148579	4623.67	3314.66	19:hsa;hsa-mir-99b,7,28,+	4623.67	3314.66
hsa-miR-152-3p	1341	146285	146281	4552.28	3263.48	17:hsa;hsa-mir-152,54,74,-	4552.16	3263.39
hsa-miR-23a-3p	1337	137281	135742	4272.08	3062.61	19:hsa;hsa-mir-23a,45,65,-	4224.19	3028.27
hsa-miR-92a-3p	1763	132103	69783.8	4110.95	2947.09	13:hsa;hsa-mir-92a-1,48,69,+	2171.62	1556.81
hsa-miR-92a-3p	1756	128393	66073.8	3995.5	2864.33	X:hsa;hsa-mir-92a-2,48,69,-	2056.17	1474.04
hsa-miR-423-3p	2307	122151	122151	3801.25	2725.07	17:hsa;hsa-mir-423,53,75,+	3801.25	2725.07
hsa-miR-148b-3p	879	108960	108170	3390.76	2430.79	12:hsa;hsa-mir-148b,63,84,+	3366.16	2413.16
hsa-miR-101-3p	1365	97697	49818	3040.26	2179.53	9:hsa;hsa-mir-101-2,49,69,+	1550.3	1111.39
hsa-miR-101-3p	1337	96406	48527	3000.08	2150.73	1:hsa;hsa-mir-101-1,47,67,-	1510.12	1082.59
hsa-miR-221-5p	1151	88302	88302	2747.89	1969.93	X:hsa;hsa-mir-221,25,46,-	2747.89	1969.93
hsa-miR-218-5p	1141	79422	41141	2471.55	1771.83	4:hsa;hsa-mir-218-1,25,45,+	1280.28	917.817
hsa-miR-218-5p	1034	76770	38489	2389.03	1712.67	5:hsa;hsa-mir-218-2,25,45,-	1197.75	858.653
hsa-miR-125a-5p	850	69605	69605	2166.06	1552.82	19:hsa;hsa-mir-125a,15,38,+	2166.06	1552.82
hsa-miR-25-3p	935	69333	69331.7	2157.59	1546.75	7:hsa;hsa-mir-25,52,73,-	2157.55	1546.72
hsa-miR-99a-5p	878	66651	61125.5	2074.13	1486.92	21:hsa;hsa-mir-99a,13,34,+	1902.18	1363.65
hsa-miR-30e-5p	914	65555	65209.8	2040.02	1462.47	1:hsa;hsa-mir-30e,17,38,+	2029.28	1454.77
hsa-let-7e-5p	768	64038	63125.2	1992.82	1428.63	19:hsa;hsa-let-7e,8,29,+	1964.41	1408.26
hsa-miR-181a-5p	1240	59122	29574.8	1839.83	1318.96	1:hsa;hsa-mir-181a-1,24,46,-	920.345	659.785
hsa-miR-181a-5p	1230	59096	29548.8	1839.02	1318.38	9:hsa;hsa-mir-181a-2,39,61,+	919.535	659.205
hsa-miR-191-5p	1015	58306	58306	1814.44	1300.75	3:hsa;hsa-mir-191,16,38,-	1814.44	1300.75
hsa-miR-30c-5p	721	54948	27486.2	1709.94	1225.84	6:hsa;hsa-mir-30c-2,7,29,-	855.349	613.19
hsa-miR-30c-5p	715	54908	27446.2	1708.7	1224.95	1:hsa;hsa-mir-30c-1,17,39,+	854.105	612.298
hsv1-miR-H6-3p	1351	53152	26576	1654.05	1185.77	JQ673480:hsv1;hsv1-mir-H6,54,74,-	827.026	592.885
hsv1-miR-H6-3p	1351	53152	26576	1654.05	1185.77	JQ673480:hsv1;hsv1-mir-H6,54,74,+	827.026	592.885
hsa-miR-23b-3p	972	52921	51384.3	1646.86	1180.62	9:hsa;hsa-mir-23b,58,78,+	1599.04	1146.34
hsa-miR-140-3p	1436	52737	52737	1641.14	1176.51	16:hsa;hsa-mir-140,62,82,+	1641.14	1176.51
hsa-miR-26b-5p	574	52462	52458	1632.58	1170.38	2:hsa;hsa-mir-26b,12,32,+	1632.45	1170.29
hsa-miR-145-5p	614	51244	51244	1594.68	1143.2	5:hsa;hsa-mir-145,16,38,+	1594.68	1143.2
hsa-miR-455-5p	993	47874	47874	1489.8	1068.02	9:hsa;hsa-mir-455,16,37,+	1489.8	1068.02
hsa-miR-379-5p	556	45960	45960	1430.24	1025.32	14:hsa;hsa-mir-379,6,26,+	1430.24	1025.32
hsa-miR-532-5p	679	41698	41698	1297.61	930.24	X:hsa;hsa-mir-532,20,41,+	1297.61	930.243
hsa-miR-146b-5p	738	38868	38864	1209.54	867.11	10:hsa;hsa-mir-146b,9,30,+	1209.42	867.019
hsa-miR-146a-5p	927	38396	38392	1194.86	856.58	5:hsa;hsa-mir-146a,21,42,+	1194.73	856.489
hsa-miR-31-5p	806	37996	37996	1182.41	847.65	9:hsa;hsa-mir-31,8,28,-	1182.41	847.655
hsa-miR-370-3p	781	34886	34886	1085.63	778.27	14:hsa;hsa-mir-370,48,69,+	1085.63	778.274
hsa-miR-20a-5p	475	34598	34447.8	1076.66	771.85	13:hsa;hsa-mir-20a,8,30,+	1071.99	768.498
hsa-miR-151a-3p	1677	32390	32390	1007.95	722.59	8:hsa;hsa-mir-151a,47,67,-	1007.95	722.59
hsa-miR-155-5p	915	31335	31335	975.12	699.05	21:hsa;hsa-mir-155,4,26,+	975.122	699.054
hsa-miR-423-5p	584	31246	31246	972.35	697.07	17:hsa;hsa-mir-423,17,39,+	972.353	697.069
hsa-miR-34c-5p	539	31228	31225.5	971.79	696.67	11:hsa;hsa-mir-34c,13,35,+	971.715	696.611
hsa-miR-93-5p	728	29419	29419	915.5	656.31	7:hsa;hsa-mir-93,11,33,-	915.498	656.31
hsa-miR-411-5p	501	29253	29253	910.33	652.61	14:hsa;hsa-mir-411,16,36,+	910.332	652.607
hsa-miR-409-3p	1077	28280	28280	880.05	630.9	14:hsa;hsa-mir-409,47,68,+	880.053	630.9
hsa-miR-16-5p	510	25729	13024	800.67	573.99	13:hsa;hsa-mir-16-1,14,35,-	405.297	290.553
hsa-miR-16-5p	525	25559	12854	795.38	570.2	3:hsa;hsa-mir-16-2,10,31,+	400.007	286.761
hsa-miR-214-3p	896	24152	24152	751.59	538.81	1:hsa;hsa-mir-214,71,92,-	751.593	538.808
hsa-miR-224-5p	557	23858	23858	742.44	532.25	X:hsa;hsa-mir-224,8,28,-	742.444	532.249
hsa-miR-106b-3p	749	23598	23598	734.35	526.45	7:hsa;hsa-mir-106b,52,73,-	734.353	526.449
hsa-miR-128-3p	654	22732	14749.5	707.4	507.13	2:hsa;hsa-mir-128-1,50,70,+	458.994	329.047
hsa-miR-34a-5p	668	22069	22069	686.77	492.34	1:hsa;hsa-mir-34a,22,43,-	686.771	492.338
hsa-miR-654-3p	589	20608	20608	641.31	459.74	14:hsa;hsa-mir-654,51,72,+	641.306	459.745
hsa-miR-493-5p	312	20489	20489	637.6	457.09	14:hsa;hsa-mir-493,16,37,+	637.603	457.09
hsa-miR-374b-5p	420	19507	19465.5	607.04	435.18	X:hsa;hsa-mir-374b,11,32,-	605.752	434.257
hsa-miR-192-5p	766	19460	19444.5	605.58	434.13	11:hsa;hsa-mir-192,24,44,-	605.099	433.788
hsa-miR-92b-3p	1047	18356	18354.7	571.23	409.5	1:hsa;hsa-mir-92b,61,82,+	571.184	409.475
hsa-miR-21-3p	701	17381	17381	540.88	387.75	17:hsa;hsa-mir-21,46,66,+	540.884	387.754
hsa-miR-128-3p	482	16996	9013.5	528.9	379.16	3:hsa;hsa-mir-128-2,52,72,+	280.494	201.083
hsa-miR-361-3p	589	16883	16883	525.39	376.64	X:hsa;hsa-mir-361,45,67,-	525.387	376.644
hsa-miR-98-5p	345	16735	16111.1	520.78	373.34	X:hsa;hsa-mir-98,22,43,-	501.366	359.423
hsa-miR-1307-3p	873	16526	16526	514.28	368.68	10:hsa;hsa-mir-1307,80,101,-	514.277	368.679
hsa-miR-30a-3p	621	15897	15886	494.7	354.65	6:hsa;hsa-mir-30a,47,68,-	494.361	354.402
hsa-let-7d-5p	364	15379	14205.6	478.58	343.09	9:hsa;hsa-let-7d,8,29,+	442.067	316.913
hsa-miR-17-5p	434	15194	15061.8	472.83	338.96	13:hsa;hsa-mir-17,14,36,+	468.713	336.015
hsa-let-7c-5p	464	13655	10588.9	424.93	304.63	21:hsa;hsa-let-7c,11,32,+	329.518	236.228
hsa-miR-769-5p	462	13239	13239	411.99	295.35	19:hsa;hsa-mir-769,30,51,+	411.988	295.35
hsa-miR-181b-5p	811	12963	6851.08	403.4	289.19	9:hsa;hsa-mir-181b-2,16,38,+	213.201	152.841
hsa-miR-455-3p	509	12781	12781	397.74	285.13	9:hsa;hsa-mir-455,54,74,+	397.735	285.132
hsa-miR-181b-5p	793	12655	6543.08	393.81	282.32	1:hsa;hsa-mir-181b-1,36,58,-	203.616	145.97
hsa-miR-136-3p	382	12491	12491	388.71	278.66	14:hsa;hsa-mir-136,49,70,+	388.711	278.662
hsa-miR-30b-5p	297	12349	12311.7	384.29	275.49	8:hsa;hsa-mir-30b,17,38,-	383.13	274.662
hsa-miR-484	459	11692	11692	363.85	260.84	16:hsa;hsa-mir-484,8,29,+	363.846	260.837
hsa-miR-196b-5p	373	11391	11381.7	354.48	254.12	7:hsa;hsa-mir-196b,15,36,-	354.189	253.914
hsa-miR-4485-3p	500	11295	11295	351.49	251.98	11:hsa;hsa-mir-4485,31,50,-	351.492	251.981
hsa-miR-125b-1-3p	619	11204	11204	348.66	249.95	11:hsa;hsa-mir-125b-1,55,76,-	348.66	249.951
hsa-miR-107	546	11091	5649.5	345.14	247.43	10:hsa;hsa-mir-107,50,72,-	175.808	126.035
hsa-miR-186-5p	447	11084	11084	344.93	247.27	1:hsa;hsa-mir-186,15,36,-	344.926	247.274
hsa-miR-494-3p	260	10587	10587	329.46	236.19	14:hsa;hsa-mir-494,48,69,+	329.46	236.186
hsv1-miR-H4-3p	514	9865	4932.5	306.99	220.08	JQ673480:hsv1;hsv1-mir-H4,54,75,+	153.496	110.039
hsv1-miR-H4-3p	514	9865	4932.5	306.99	220.08	JQ673480:hsv1;hsv1-mir-H4,54,75,-	153.496	110.039
hsa-miR-425-5p	462	9861	9861	306.87	219.99	3:hsa;hsa-mir-425,14,36,-	306.867	219.99
hsa-miR-99b-3p	619	9431	9431	293.49	210.4	19:hsa;hsa-mir-99b,45,66,+	293.486	210.397
hsa-miR-889-3p	270	9377	9377	291.81	209.19	14:hsa;hsa-mir-889,49,69,+	291.805	209.192
hsa-miR-30e-3p	385	8880	8871	276.34	198.1	1:hsa;hsa-mir-30e,59,80,+	276.059	197.904
hsa-miR-503-5p	553	8863	8863	275.81	197.73	X:hsa;hsa-mir-503,6,28,-	275.81	197.725
hsa-miR-127-5p	468	8760	8760	272.6	195.43	14:hsa;hsa-mir-127,23,44,+	272.605	195.427
hsa-miR-134-5p	525	8139	8139	253.28	181.57	14:hsa;hsa-mir-134,8,29,+	253.28	181.573
hsa-miR-29b-3p	273	8097	4044.33	251.97	180.64	1:hsa;hsa-mir-29b-2,52,74,-	125.857	90.2252
hsa-miR-29b-3p	273	8083	4030.33	251.54	180.32	7:hsa;hsa-mir-29b-1,51,73,-	125.421	89.9129
hsa-miR-744-5p	281	8073	8073	251.23	180.1	17:hsa;hsa-mir-744,11,32,+	251.226	180.101
hsa-miR-382-3p	271	7849	7849	244.26	175.1	14:hsa;hsa-mir-382,47,67,+	244.255	175.104
hsa-miR-138-5p	477	7763	5796.5	241.58	173.19	3:hsa;hsa-mir-138-1,23,45,+	180.383	129.314
hsa-miR-660-5p	199	7651	7651	238.09	170.69	X:hsa;hsa-mir-660,16,37,+	238.094	170.687
hsa-miR-24-2-5p	322	7622	7618	237.19	170.04	19:hsa;hsa-mir-24-2,13,34,-	237.067	169.95
hsa-miR-452-5p	363	7599	7599	236.48	169.53	X:hsa;hsa-mir-452,14,35,-	236.475	169.526
hsa-miR-365b-3p	254	7544	3773.5	234.76	168.3	17:hsa;hsa-mir-365b,68,89,+	117.429	84.1832
hsa-miR-365a-3p	254	7543	3772.5	234.73	168.28	16:hsa;hsa-mir-365a,56,77,+	117.397	84.1609
hsa-miR-450b-5p	175	6973	6973	216.99	155.56	X:hsa;hsa-mir-450b,11,32,-	216.995	155.561
hsa-miR-424-3p	306	6795	6795	211.46	151.59	X:hsa;hsa-mir-424,48,68,-	211.455	151.59
hsa-miR-374a-5p	206	6678	6665.5	207.81	148.98	X:hsa;hsa-mir-374a,12,33,-	207.425	148.701
hsa-miR-193a-5p	354	6661	6661	207.29	148.6	17:hsa;hsa-mir-193a,21,42,+	207.285	148.601
hsa-miR-409-5p	259	6451	6451	200.75	143.92	14:hsa;hsa-mir-409,15,37,+	200.75	143.916
hsv1-miR-H1-5p	458	6327	3163.5	196.89	141.15	JQ673480:hsv1;hsv1-mir-H1,15,35,-	98.4458	70.5747
hsv1-miR-H1-5p	458	6327	3163.5	196.89	141.15	JQ673480:hsv1;hsv1-mir-H1,15,35,+	98.4458	70.5747
hsa-miR-181a-3p	236	6311	6299	196.39	140.79	1:hsa;hsa-mir-181a-1,64,85,-	196.02	140.525
hsa-miR-450a-5p	197	6114	3070.5	190.26	136.4	X:hsa;hsa-mir-450a-2,23,44,-	95.5517	68.4999
hsa-miR-450a-5p	194	6101	3057.5	189.86	136.11	X:hsa;hsa-mir-450a-1,18,39,-	95.1472	68.2099
hsa-miR-145-3p	293	6094	6094	189.64	135.95	5:hsa;hsa-mir-145,54,75,+	189.641	135.951
hsa-miR-214-5p	227	6080	6080	189.21	135.64	1:hsa;hsa-mir-214,30,51,-	189.205	135.639
hsa-miR-143-5p	322	6069	6069	188.86	135.39	5:hsa;hsa-mir-143,27,48,+	188.863	135.394
hsa-miR-654-5p	326	6045	6045	188.12	134.86	14:hsa;hsa-mir-654,16,37,+	188.116	134.858
hsa-miR-542-3p	368	6030	6030	187.65	134.52	X:hsa;hsa-mir-542,53,74,-	187.649	134.524
hsa-miR-10b-5p	256	5987	5974	186.31	133.56	2:hsa;hsa-mir-10b,27,49,+	185.907	133.274
hsa-miR-323a-3p	243	5851	5847	182.08	130.53	14:hsa;hsa-mir-323a,51,71,+	181.954	130.441
hsa-miR-382-5p	343	5822	5822	181.18	129.88	14:hsa;hsa-mir-382,11,32,+	181.176	129.883
hsa-miR-320a	944	4928	4780.97	153.36	109.94	8:hsa;hsa-mir-320a,48,69,-	148.78	106.659
hsa-miR-424-5p	206	4851	4851	150.96	108.22	X:hsa;hsa-mir-424,11,32,-	150.96	108.221
hsa-miR-138-5p	356	4845	2878.5	150.77	108.09	16:hsa;hsa-mir-138-2,10,32,+	89.5768	64.2166
hsa-miR-106b-5p	244	4833	4833	150.4	107.82	7:hsa;hsa-mir-106b,12,32,-	150.399	107.82
hsa-let-7a-3p	235	4814	2458	149.81	107.4	9:hsa;hsa-let-7a-1,57,77,+	76.4912	54.8356
hsa-miR-500a-3p	316	4775	4127.5	148.59	106.53	X:hsa;hsa-mir-500a,52,73,+	128.445	92.0806
hsa-let-7a-3p	204	4712	2356	146.63	105.12	22:hsa;hsa-let-7a-3,52,72,+	73.317	52.5601
hsa-miR-130b-5p	132	4614	4614	143.58	102.93	22:hsa;hsa-mir-130b,13,33,+	143.584	102.934
hsa-miR-193b-3p	413	4579	4578.5	142.5	102.15	16:hsa;hsa-mir-193b,51,72,+	142.48	102.142
hsa-miR-629-5p	194	4475	4475	139.26	99.83	15:hsa;hsa-mir-629,22,42,-	139.259	99.833
hsa-miR-3615	368	4362	4362	135.74	97.31	17:hsa;hsa-mir-3615,51,71,+	135.742	97.3121
hsa-miR-19b-3p	192	4289	2170	133.47	95.68	X:hsa;hsa-mir-19b-2,62,84,-	67.5288	48.4106
hsa-miR-32-5p	135	4264	4264	132.69	95.13	9:hsa;hsa-mir-32,6,27,-	132.693	95.1258
hsa-miR-19b-3p	187	4253	2134	132.35	94.88	13:hsa;hsa-mir-19b-1,54,76,+	66.4085	47.6075
hsa-miR-181a-2-3p	188	4232	4232	131.7	94.41	9:hsa;hsa-mir-181a-2,77,98,+	131.697	94.4119
hsa-miR-16-2-3p	234	4171	4171	129.8	93.05	3:hsa;hsa-mir-16-2,53,74,+	129.798	93.051
hsa-miR-181d-5p	376	4171	4168.33	129.8	93.05	19:hsa;hsa-mir-181d,36,58,+	129.715	92.9916
hsa-miR-140-5p	156	4161	4161	129.49	92.83	16:hsa;hsa-mir-140,23,44,+	129.487	92.828
hsa-miR-4521	483	4008	4008	124.73	89.41	17:hsa;hsa-mir-4521,4,25,+	124.726	89.4147
hsa-miR-15b-5p	143	4006	4005.5	124.66	89.37	3:hsa;hsa-mir-15b,20,41,+	124.648	89.3589
hsa-miR-210-3p	455	3958	3958	123.17	88.3	11:hsa;hsa-mir-210,66,87,-	123.17	88.2992
hsa-miR-126-3p	199	3799	3799	118.22	84.75	9:hsa;hsa-mir-126,52,73,+	118.222	84.7521
hsa-miR-625-3p	398	3757	3757	116.92	83.82	14:hsa;hsa-mir-625,52,73,+	116.915	83.8151
hsa-miR-543	221	3599	3599	112	80.29	14:hsa;hsa-mir-543,47,68,+	111.998	80.2903
hsa-miR-495-3p	231	3313	3313	103.1	73.91	14:hsa;hsa-mir-495,50,71,+	103.098	73.9099
hsa-miR-369-3p	109	3068	3068	95.47	68.44	14:hsa;hsa-mir-369,44,64,+	95.4739	68.4442
hsa-miR-132-3p	213	2912	2912	90.62	64.96	17:hsa;hsa-mir-132,59,80,-	90.6193	64.964
hsa-miR-758-3p	134	2892	2892	90	64.52	14:hsa;hsa-mir-758,52,73,+	89.9969	64.5178
hsa-miR-486-5p	234	2850	1566	88.69	63.58	8:hsa;hsa-mir-486-2,1,22,+	48.7328	34.936
hsa-miR-1185-1-3p	171	2828	2654.5	88.01	63.09	14:hsa;hsa-mir-1185-1,53,74,+	82.6061	59.2194
hsa-miR-196a-5p	168	2825	1697.17	87.91	63.02	12:hsa;hsa-mir-196a-2,25,46,+	52.8146	37.8622
hsa-miR-30c-2-3p	162	2811	2810.5	87.48	62.71	6:hsa;hsa-mir-30c-2,47,68,-	87.4607	62.6996
hsa-miR-486-5p	248	2775	1491	86.36	61.91	8:hsa;hsa-mir-486-1,4,25,-	46.3988	33.2628
hsa-miR-342-3p	204	2762	2762	85.95	61.62	14:hsa;hsa-mir-342,61,83,+	85.9514	61.6176
hsa-miR-3117-3p	282	2741	2741	85.3	61.15	1:hsa;hsa-mir-3117,46,66,+	85.2979	61.1491
hsa-miR-125b-2-3p	253	2724	2724	84.77	60.77	21:hsa;hsa-mir-125b-2,54,75,+	84.7689	60.7699
hsv1-miR-H2-3p	217	2691	1345.5	83.74	60.03	JQ673480:hsv1;hsv1-mir-H2,47,70,+	41.871	30.0168
hsv1-miR-H2-3p	217	2691	1345.5	83.74	60.03	JQ673480:hsv1;hsv1-mir-H2,47,70,-	41.871	30.0168
hsa-miR-215-5p	132	2638	2622.5	82.09	58.85	1:hsa;hsa-mir-215,27,47,-	81.6103	58.5055
hsa-miR-22-5p	138	2602	2602	80.97	58.05	17:hsa;hsa-mir-22,15,36,-	80.9723	58.0481
hsa-let-7d-3p	169	2585	2585	80.44	57.67	9:hsa;hsa-let-7d,62,83,+	80.4433	57.6689
hsa-miR-331-3p	168	2527	2527	78.64	56.37	12:hsa;hsa-mir-331,61,81,+	78.6384	56.375
hsa-miR-149-5p	176	2490	2490	77.49	55.55	2:hsa;hsa-mir-149,15,37,+	77.487	55.5495
hsa-miR-130a-3p	181	2474	2473.5	76.99	55.19	11:hsa;hsa-mir-130a,55,76,+	76.9735	55.1814
hsa-miR-454-3p	191	2438	2438	75.87	54.39	17:hsa;hsa-mir-454,64,86,-	75.8688	54.3895
hsa-miR-31-3p	145	2386	2386	74.25	53.23	9:hsa;hsa-mir-31,44,65,-	74.2506	53.2294
hsa-miR-196a-5p	138	2309	1182.17	71.85	51.51	17:hsa;hsa-mir-196a-1,7,28,-	36.7882	26.373
hsa-miR-502-3p	188	2246	1601.5	69.89	50.11	X:hsa;hsa-mir-502,52,73,+	49.8375	35.7279
hsa-miR-345-5p	185	2240	2240	69.71	49.97	14:hsa;hsa-mir-345,18,39,+	69.7072	49.9723
hsa-miR-411-3p	110	2225	2224.5	69.24	49.64	14:hsa;hsa-mir-411,51,72,+	69.2248	49.6265
hsa-miR-339-3p	212	2221	2221	69.12	49.55	7:hsa;hsa-mir-339,50,72,-	69.1159	49.5484
hsa-miR-1307-5p	174	2127	2127	66.19	47.45	10:hsa;hsa-mir-1307,41,61,-	66.1907	47.4513
hsa-miR-181c-3p	146	2110	2098	65.66	47.07	19:hsa;hsa-mir-181c,65,86,+	65.2882	46.8044
hsa-miR-330-3p	226	1986	1986	61.8	44.31	19:hsa;hsa-mir-330,57,79,-	61.8029	44.3058
hsa-miR-487b-3p	200	1975	1975	61.46	44.06	14:hsa;hsa-mir-487b,51,72,+	61.4606	44.0604
hsa-miR-299-3p	189	1918	1918	59.69	42.79	14:hsa;hsa-mir-299,39,60,+	59.6868	42.7888
hsa-miR-194-5p	120	1910	1371	59.44	42.61	1:hsa;hsa-mir-194-1,15,36,-	42.6645	30.5857
hsa-miR-490-3p	178	1875	1875	58.35	41.83	7:hsa;hsa-mir-490,76,97,+	58.3486	41.8295
hsa-miR-5100	20	1874	1874	58.32	41.81	10:hsa;hsa-mir-5100,68,89,+	58.3175	41.8072
hsa-miR-136-5p	124	1862	1862	57.94	41.54	14:hsa;hsa-mir-136,15,37,+	57.9441	41.5395
hsa-miR-1296-5p	199	1795	1795	55.86	40.04	10:hsa;hsa-mir-1296,16,37,-	55.8591	40.0447
hsa-miR-1180-3p	159	1761	1761	54.8	39.29	17:hsa;hsa-mir-1180,41,62,-	54.801	39.2862
hsa-miR-323b-3p	79	1745	1741	54.3	38.93	14:hsa;hsa-mir-323b,51,72,+	54.1786	38.8401
hsa-miR-129-5p	158	1738	879.5	54.09	38.77	11:hsa;hsa-mir-129-2,15,35,+	27.3694	19.6208
hsa-miR-129-5p	152	1726	867.5	53.71	38.51	7:hsa;hsa-mir-129-1,5,25,+	26.996	19.3531
hsa-miR-501-3p	126	1713	1703.5	53.31	38.22	X:hsa;hsa-mir-501,51,72,+	53.0117	38.0035
hsa-miR-432-5p	211	1705	1705	53.06	38.04	14:hsa;hsa-mir-432,14,36,+	53.0584	38.0369
hsa-miR-485-3p	152	1694	1694	52.72	37.79	14:hsa;hsa-mir-485,46,67,+	52.716	37.7915
hsa-miR-410-3p	83	1674	1674	52.09	37.35	14:hsa;hsa-mir-410,50,70,+	52.0937	37.3453
hsa-let-7b-3p	130	1626	1624.5	50.6	36.27	22:hsa;hsa-let-7b,60,81,+	50.5533	36.2411
hsa-miR-7974	95	1622	1622	50.48	36.19	19:hsa;hsa-mir-7974,56,79,-	50.4755	36.1853
hsa-miR-15b-3p	124	1609	1609	50.07	35.9	3:hsa;hsa-mir-15b,58,79,+	50.0709	35.8953
hsa-miR-505-3p	170	1572	1572	48.92	35.07	X:hsa;hsa-mir-505,51,72,-	48.9195	35.0698
hsa-miR-589-5p	113	1555	1555	48.39	34.69	7:hsa;hsa-mir-589,24,45,-	48.3905	34.6906
hsa-miR-671-3p	170	1547	1547	48.14	34.51	7:hsa;hsa-mir-671,68,88,+	48.1415	34.5121
hsa-miR-425-3p	241	1531	1531	47.64	34.16	3:hsa;hsa-mir-425,55,76,-	47.6436	34.1552
hsa-let-7i-3p	93	1504	1504	46.8	33.55	12:hsa;hsa-let-7i,62,83,+	46.8034	33.5528
hsa-miR-329-3p	180	1485	742.5	46.21	33.13	14:hsa;hsa-mir-329-1,50,71,+	23.1061	16.5645
hsa-miR-329-3p	180	1485	742.5	46.21	33.13	14:hsa;hsa-mir-329-2,52,73,+	23.1061	16.5645
hsa-miR-182-5p	131	1484	1484	46.18	33.11	7:hsa;hsa-mir-182,23,46,-	46.181	33.1066
hsa-miR-194-5p	113	1481	942	46.09	33.04	11:hsa;hsa-mir-194-2,15,36,-	29.3144	21.0151
hsa-miR-1304-3p	54	1439	1439	44.78	32.1	11:hsa;hsa-mir-1304,53,74,-	44.7806	32.1027
hsv1-miR-H6-5p	235	1415	707.5	44.03	31.57	JQ673480:hsv1;hsv1-mir-H6,14,34,-	22.0169	15.7837
hsv1-miR-H6-5p	235	1415	707.5	44.03	31.57	JQ673480:hsv1;hsv1-mir-H6,14,34,+	22.0169	15.7837
hsa-miR-19a-3p	149	1412	1410	43.94	31.5	13:hsa;hsa-mir-19a,49,71,+	43.8782	31.4558
hsa-miR-132-5p	115	1348	1348	41.95	30.07	17:hsa;hsa-mir-132,23,44,-	41.9488	30.0726
hsa-miR-369-5p	78	1319	1319	41.05	29.43	14:hsa;hsa-mir-369,9,30,+	41.0463	29.4256
hsa-miR-7977	11	1301	1301	40.49	29.02	3:hsa;hsa-mir-7977,1,18,+	40.4862	29.0241
hsv1-miR-H1-3p	146	1293	646.5	40.24	28.85	JQ673480:hsv1;hsv1-mir-H1,53,75,-	20.1186	14.4228
hsv1-miR-H1-3p	146	1293	646.5	40.24	28.85	JQ673480:hsv1;hsv1-mir-H1,53,75,+	20.1186	14.4228
hsa-miR-362-5p	101	1227	1227	38.18	27.37	X:hsa;hsa-mir-362,5,28,+	38.1833	27.3732
hsa-miR-7706	145	1199	1199	37.31	26.75	15:hsa;hsa-mir-7706,44,67,+	37.312	26.7486
hsa-miR-377-3p	85	1173	1173	36.5	26.17	14:hsa;hsa-mir-377,45,66,+	36.5029	26.1685
hsa-miR-598-3p	121	1149	1149	35.76	25.63	8:hsa;hsa-mir-598,61,82,-	35.756	25.6331
hsa-miR-376c-3p	120	1148	1147.33	35.72	25.61	14:hsa;hsa-mir-376c,43,63,+	35.7042	25.5959
hsa-miR-539-3p	98	1091	1091	33.95	24.34	14:hsa;hsa-mir-539,49,70,+	33.9511	24.3392
hsa-miR-1287-5p	94	1088	1088	33.86	24.27	10:hsa;hsa-mir-1287,16,37,-	33.8578	24.2722
hsa-miR-148b-5p	99	1047	1047	32.58	23.36	12:hsa;hsa-mir-148b,25,46,+	32.5819	23.3576
hsa-let-7f-2-3p	68	1027	1027	31.96	22.91	X:hsa;hsa-let-7f-2,58,79,-	31.9595	22.9114
hsa-miR-1278	73	994	994	30.93	22.18	1:hsa;hsa-mir-1278,50,71,+	30.9326	22.1752
hsa-miR-656-3p	65	976	976	30.37	21.77	14:hsa;hsa-mir-656,43,63,+	30.3724	21.7736
hsa-miR-615-3p	100	966	966	30.06	21.55	12:hsa;hsa-mir-615,61,82,+	30.0612	21.5505
hsa-miR-196a-3p	57	950	950	29.56	21.19	12:hsa;hsa-mir-196a-2,62,83,+	29.5633	21.1936
hsa-miR-296-3p	153	949	949	29.53	21.17	20:hsa;hsa-mir-296,48,69,-	29.5322	21.1713
hsa-miR-549a	108	940	940	29.25	20.97	15:hsa;hsa-mir-549a,61,81,-	29.2521	20.9705
hsa-miR-4677-3p	51	916	916	28.51	20.44	1:hsa;hsa-mir-4677,50,71,+	28.5053	20.4351
hsv1-miR-H2-5p	77	892	446	27.76	19.9	JQ673480:hsv1;hsv1-mir-H2,8,29,+	13.8792	9.94984
hsv1-miR-H2-5p	77	892	446	27.76	19.9	JQ673480:hsv1;hsv1-mir-H2,8,29,-	13.8792	9.94984
hsa-miR-1185-2-3p	106	885	711.5	27.54	19.74	14:hsa;hsa-mir-1185-2,53,74,+	22.1414	15.8729
hsa-miR-376a-3p	69	878	438.67	27.32	19.59	14:hsa;hsa-mir-376a-1,44,64,+	13.651	9.78624
hsa-miR-376a-3p	69	878	438.67	27.32	19.59	14:hsa;hsa-mir-376a-2,50,70,+	13.651	9.78624
hsa-miR-433-3p	101	867	867	26.98	19.34	14:hsa;hsa-mir-433,64,85,+	26.9804	19.3419
hsa-miR-148a-5p	82	858	858	26.7	19.14	7:hsa;hsa-mir-148a,6,27,-	26.7003	19.1412
hsa-miR-651-5p	71	852	852	26.51	19.01	X:hsa;hsa-mir-651,16,37,+	26.5136	19.0073
hsa-miR-10a-5p	97	847	828	26.36	18.9	17:hsa;hsa-mir-10a,22,44,-	25.7668	18.4719
hsa-miR-655-3p	80	833	833	25.92	18.58	14:hsa;hsa-mir-655,61,82,+	25.9224	18.5834
hsa-miR-299-5p	76	832	832	25.89	18.56	14:hsa;hsa-mir-299,7,28,+	25.8912	18.5611
hsa-miR-3158-3p	80	830	415.5	25.83	18.52	10:hsa;hsa-mir-3158-1,50,71,+	12.9301	9.26941
hsa-miR-3158-3p	79	829	414.5	25.8	18.49	10:hsa;hsa-mir-3158-2,50,71,-	12.8989	9.2471
hsa-miR-532-3p	69	829	829	25.8	18.49	X:hsa;hsa-mir-532,57,78,+	25.7979	18.4942
hsa-miR-15a-5p	87	819	818.5	25.49	18.27	13:hsa;hsa-mir-15a,14,35,-	25.4711	18.26
hsa-miR-431-5p	65	818	818	25.46	18.25	14:hsa;hsa-mir-431,20,40,+	25.4556	18.2488
hsa-miR-379-3p	53	772	771.5	24.02	17.22	14:hsa;hsa-mir-379,44,65,+	24.0085	17.2114
hsa-miR-652-3p	85	768	768	23.9	17.13	X:hsa;hsa-mir-652,61,81,+	23.8996	17.1334
hsa-miR-431-3p	179	766	766	23.84	17.09	14:hsa;hsa-mir-431,63,84,+	23.8374	17.0887
hsa-miR-1-3p	53	757	409	23.56	16.89	18:hsa;hsa-mir-1-2,53,74,-	12.7278	9.1244
hsa-miR-664a-3p	65	750	750	23.34	16.73	1:hsa;hsa-mir-664a,49,71,-	23.3395	16.7318
hsa-miR-337-3p	69	746	746	23.21	16.64	14:hsa;hsa-mir-337,61,82,+	23.215	16.6426
hsa-miR-671-5p	129	718	718	22.34	16.02	7:hsa;hsa-mir-671,29,51,+	22.3436	16.0179
hsa-miR-1-3p	49	714	366	22.22	15.93	20:hsa;hsa-mir-1-1,46,67,+	11.3897	8.16511
hsa-miR-29c-3p	113	705	650	21.94	15.73	1:hsa;hsa-mir-29c,54,75,-	20.2275	14.5009
hsa-miR-185-3p	77	681	681	21.19	15.19	22:hsa;hsa-mir-185,50,71,+	21.1922	15.1925
hsv1-miR-H11	172	675	335	21.01	15.06	JQ673480:hsv1;hsv1-mir-H11,73,92,-	10.425	7.47353
hsv1-miR-H11	172	675	335	21.01	15.06	JQ673480:hsv1;hsv1-mir-H11,73,92,+	10.425	7.47353
hsa-miR-582-3p	60	653	653	20.32	14.57	5:hsa;hsa-mir-582,53,74,-	20.3209	14.5678
hsa-miR-485-5p	73	637	637	19.82	14.21	14:hsa;hsa-mir-485,9,30,+	19.823	14.2109
hsa-miR-877-5p	136	636	636	19.79	14.19	6:hsa;hsa-mir-877,1,20,+	19.7919	14.1886
hsa-miR-183-5p	76	630	630	19.61	14.05	7:hsa;hsa-mir-183,27,48,-	19.6051	14.0547
hsa-miR-146b-3p	84	629	629	19.57	14.03	10:hsa;hsa-mir-146b,45,66,+	19.574	14.0324
hsa-miR-27a-5p	77	620	620	19.29	13.83	19:hsa;hsa-mir-27a,10,31,-	19.2939	13.8316
hsa-miR-3909	75	610	610	18.98	13.61	22:hsa;hsa-mir-3909,71,92,+	18.9828	13.6085
hsa-miR-941	225	606	35.65	18.86	13.52	20:hsa;hsa-mir-941-5,47,69,+	1.10931	0.795252
hsa-miR-941	225	606	35.65	18.86	13.52	20:hsa;hsa-mir-941-3,47,69,+	1.10931	0.795252
hsa-miR-941	225	606	35.65	18.86	13.52	20:hsa;hsa-mir-941-2,47,69,+	1.10931	0.795252
hsa-miR-941	225	606	35.65	18.86	13.52	20:hsa;hsa-mir-941-2,47,69,+	1.10931	0.795252
hsa-miR-941	225	606	35.65	18.86	13.52	20:hsa;hsa-mir-941-5,47,69,+	1.10931	0.795252
hsa-miR-941	225	606	35.65	18.86	13.52	20:hsa;hsa-mir-941-2,47,69,+	1.10931	0.795252
hsa-miR-941	225	606	35.65	18.86	13.52	20:hsa;hsa-mir-941-1,47,69,+	1.10931	0.795252
hsa-miR-941	225	606	35.65	18.86	13.52	20:hsa;hsa-mir-941-3,47,69,+	1.10931	0.795252
hsa-miR-941	225	606	35.65	18.86	13.52	20:hsa;hsa-mir-941-3,47,69,+	1.10931	0.795252
hsa-miR-941	225	606	35.65	18.86	13.52	20:hsa;hsa-mir-941-4,47,69,+	1.10931	0.795252
hsa-miR-941	225	606	35.65	18.86	13.52	20:hsa;hsa-mir-941-3,47,69,+	1.10931	0.795252
hsa-miR-941	225	606	35.65	18.86	13.52	20:hsa;hsa-mir-941-4,47,69,+	1.10931	0.795252
hsa-miR-941	225	606	35.65	18.86	13.52	20:hsa;hsa-mir-941-5,47,69,+	1.10931	0.795252
hsa-miR-941	225	606	35.65	18.86	13.52	20:hsa;hsa-mir-941-2,47,69,+	1.10931	0.795252
hsa-miR-941	225	606	35.65	18.86	13.52	20:hsa;hsa-mir-941-4,47,69,+	1.10931	0.795252
hsa-miR-941	225	606	35.65	18.86	13.52	20:hsa;hsa-mir-941-4,47,69,+	1.10931	0.795252
hsa-miR-941	225	606	35.65	18.86	13.52	20:hsa;hsa-mir-941-5,47,69,+	1.10931	0.795252
hsa-miR-27b-5p	79	601	601	18.7	13.41	9:hsa;hsa-mir-27b,19,40,+	18.7027	13.4077
hsa-miR-2277-5p	84	595	595	18.52	13.27	5:hsa;hsa-mir-2277,18,41,-	18.516	13.2739
hsa-miR-330-5p	66	594	594	18.48	13.25	19:hsa;hsa-mir-330,18,39,-	18.4848	13.2516
hsa-miR-152-5p	57	584	584	18.17	13.03	17:hsa;hsa-mir-152,16,38,-	18.1737	13.0285
hsa-miR-9-5p	79	574	192	17.86	12.81	5:hsa;hsa-mir-9-2,16,38,-	5.9749	4.28334
hsa-miR-340-3p	63	573	573	17.83	12.78	5:hsa;hsa-mir-340,58,79,-	17.8313	12.7831
hsa-miR-9-5p	78	573	191	17.83	12.78	15:hsa;hsa-mir-9-3,16,38,+	5.94378	4.26103
hsa-miR-9-5p	78	573	191	17.83	12.78	1:hsa;hsa-mir-9-1,16,38,-	5.94378	4.26103
hsa-miR-125a-3p	81	568	568	17.68	12.67	19:hsa;hsa-mir-125a,53,74,+	17.6757	12.6715
hsa-miR-130b-3p	92	565	564.5	17.58	12.6	22:hsa;hsa-mir-130b,51,72,+	17.5668	12.5935
hsa-miR-185-5p	199	537	537	16.71	11.98	22:hsa;hsa-mir-185,15,36,+	16.711	11.98
hsa-miR-92b-5p	95	537	537	16.71	11.98	1:hsa;hsa-mir-92b,20,41,+	16.711	11.98
hsa-miR-1301-3p	95	526	526	16.37	11.73	2:hsa;hsa-mir-1301,48,71,-	16.3687	11.7346
hsa-miR-30d-3p	86	517	515	16.09	11.53	8:hsa;hsa-mir-30d,46,67,-	16.0264	11.4892
hsa-miR-421	101	516	516	16.06	11.51	X:hsa;hsa-mir-421,48,70,-	16.0575	11.5115
hsa-miR-340-5p	129	515	515	16.03	11.49	5:hsa;hsa-mir-340,16,37,-	16.0264	11.4892
hsa-miR-193a-3p	66	503	502.5	15.65	11.22	17:hsa;hsa-mir-193a,55,76,+	15.6374	11.2103
hsa-miR-18a-5p	57	502	498.5	15.62	11.2	13:hsa;hsa-mir-18a,6,28,+	15.513	11.1211
hsa-miR-874-3p	65	498	498	15.5	11.11	5:hsa;hsa-mir-874,47,68,-	15.4974	11.1099
hsa-miR-493-3p	171	493	493	15.34	11	14:hsa;hsa-mir-493,57,78,+	15.3418	10.9984
hsa-miR-1197	36	483	483	15.03	10.78	14:hsa;hsa-mir-1197,57,77,+	15.0306	10.7753
hsa-miR-93-3p	109	479	479	14.91	10.69	7:hsa;hsa-mir-93,50,71,-	14.9061	10.686
hsa-miR-3607-3p	96	470	470	14.63	10.49	5:hsa;hsa-mir-3607,51,70,+	14.6261	10.4853
hsa-miR-154-3p	48	459	459	14.28	10.24	14:hsa;hsa-mir-154,51,72,+	14.2837	10.2399
hsa-miR-193b-5p	81	445	445	13.85	9.93	16:hsa;hsa-mir-193b,14,35,+	13.8481	9.92753
hsa-miR-4473	62	435	435	13.54	9.7	9:hsa;hsa-mir-4473,57,78,-	13.5369	9.70444
hsa-miR-7-1-3p	56	427	427	13.29	9.53	9:hsa;hsa-mir-7-1,66,87,-	13.2879	9.52596
hsa-miR-324-5p	65	425	425	13.23	9.48	17:hsa;hsa-mir-324,16,38,-	13.2257	9.48135
hsa-miR-200b-3p	65	422	422	13.13	9.41	1:hsa;hsa-mir-200b,57,78,+	13.1323	9.41442
hsa-miR-204-5p	49	421	420.5	13.1	9.39	9:hsa;hsa-mir-204,33,54,-	13.0857	9.38096
hsa-miR-337-5p	53	420	420	13.07	9.37	14:hsa;hsa-mir-337,23,43,+	13.0701	9.3698
hsa-miR-212-5p	55	419	419	13.04	9.35	17:hsa;hsa-mir-212,31,53,-	13.039	9.34749
hsa-miR-365a-5p	76	414	414	12.88	9.24	16:hsa;hsa-mir-365a,16,38,+	12.8834	9.23595
hsa-let-7e-3p	66	412	412	12.82	9.19	19:hsa;hsa-let-7e,53,74,+	12.8211	9.19133
hsa-let-7f-1-3p	66	409	407.5	12.73	9.12	9:hsa;hsa-let-7f-1,63,84,+	12.6811	9.09094
hsa-miR-222-5p	123	379	379	11.79	8.46	X:hsa;hsa-mir-222,31,52,-	11.7942	8.45513
hsa-miR-29a-5p	58	373	373	11.61	8.32	7:hsa;hsa-mir-29a,4,25,-	11.6075	8.32128
hsa-miR-374a-3p	109	370	370	11.51	8.25	X:hsa;hsa-mir-374a,42,63,-	11.5141	8.25435
hsa-miR-2110	66	365	365	11.36	8.14	10:hsa;hsa-mir-2110,8,29,-	11.3585	8.1428
hsa-miR-365b-5p	87	351	351	10.92	7.83	17:hsa;hsa-mir-365b,29,50,+	10.9229	7.83048
hsa-miR-2682-5p	59	342	342	10.64	7.63	1:hsa;hsa-mir-2682,23,45,-	10.6428	7.62969
hsa-miR-147b	80	341	341	10.61	7.61	15:hsa;hsa-mir-147b,49,70,+	10.6117	7.60739
hsa-miR-374b-3p	42	340	339.5	10.58	7.59	X:hsa;hsa-mir-374b,41,62,-	10.565	7.57392
hsa-miR-7704	18	338	338	10.52	7.54	2:hsa;hsa-mir-7704,1,19,+	10.5183	7.54046
hsa-miR-641	53	338	338	10.52	7.54	19:hsa;hsa-mir-641,16,39,-	10.5183	7.54046
hsa-miR-96-5p	34	336	336	10.46	7.5	7:hsa;hsa-mir-96,9,31,-	10.4561	7.49584
hsa-miR-181c-5p	56	332	332	10.33	7.41	19:hsa;hsa-mir-181c,27,48,+	10.3316	7.4066
hsa-miR-2355-3p	72	320	320	9.96	7.14	2:hsa;hsa-mir-2355,54,75,-	9.95817	7.1389
hsa-miR-584-5p	121	318	318	9.9	7.09	5:hsa;hsa-mir-584,16,37,-	9.89593	7.09428
hsa-miR-154-5p	40	314	314	9.77	7.01	14:hsa;hsa-mir-154,15,36,+	9.77145	7.00504
hsa-miR-320b	125	310	115.97	9.65	6.92	1:hsa;hsa-mir-320b-2,72,93,-	3.60883	2.58713
hsa-miR-3940-3p	51	309	309	9.62	6.89	19:hsa;hsa-mir-3940,57,78,-	9.61585	6.8935
hsa-miR-887-3p	66	307	307	9.55	6.85	5:hsa;hsa-mir-887,48,69,+	9.55362	6.84888
hsa-miR-320b	122	307	112.97	9.55	6.85	1:hsa;hsa-mir-320b-1,39,60,+	3.51548	2.52021
hsa-miR-29c-5p	62	297	297	9.24	6.63	1:hsa;hsa-mir-29c,16,37,-	9.24242	6.62579
hsa-miR-24-1-5p	63	297	293	9.24	6.63	9:hsa;hsa-mir-24-1,7,28,+	9.11795	6.53655
hsa-miR-301a-5p	31	295	295	9.18	6.58	17:hsa;hsa-mir-301a,14,35,-	9.18018	6.58117
hsa-miR-487a-3p	37	293	293	9.12	6.54	14:hsa;hsa-mir-487a,49,70,+	9.11795	6.53655
hsa-miR-17-3p	54	282	282	8.78	6.29	13:hsa;hsa-mir-17,51,72,+	8.77563	6.29115
hsa-miR-34c-3p	55	271	271	8.43	6.05	11:hsa;hsa-mir-34c,46,67,+	8.43332	6.04575
hsa-miR-561-5p	46	266	266	8.28	5.93	2:hsa;hsa-mir-561,26,47,+	8.27773	5.93421
hsa-miR-331-5p	74	266	266	8.28	5.93	12:hsa;hsa-mir-331,26,47,+	8.27773	5.93421
hsa-miR-129-2-3p	28	254	253	7.9	5.67	11:hsa;hsa-mir-129-2,57,78,+	7.87318	5.64419
hsa-miR-5010-3p	48	248	248	7.72	5.53	17:hsa;hsa-mir-5010,80,101,+	7.71758	5.53264
hsa-miR-34b-3p	44	247	247	7.69	5.51	11:hsa;hsa-mir-34b,50,71,+	7.68646	5.51034
hsa-miR-28-3p	121	243	243	7.56	5.42	3:hsa;hsa-mir-28,54,75,+	7.56198	5.4211
hsa-miR-377-5p	34	241	241	7.5	5.38	14:hsa;hsa-mir-377,7,28,+	7.49974	5.37648
hsa-miR-1306-5p	44	237	237	7.38	5.29	22:hsa;hsa-mir-1306,15,36,+	7.37527	5.28724
hsa-miR-296-5p	22	236	236	7.34	5.26	20:hsa;hsa-mir-296,14,34,-	7.34415	5.26494
hsa-miR-942-5p	38	235	235	7.31	5.24	1:hsa;hsa-mir-942,13,34,+	7.31303	5.24263
hsa-miR-574-3p	100	234	234	7.28	5.22	4:hsa;hsa-mir-574,61,82,+	7.28191	5.22032
hsa-miR-212-3p	59	234	234	7.28	5.22	17:hsa;hsa-mir-212,71,91,-	7.28191	5.22032
hsa-miR-335-3p	69	227	227	7.06	5.06	7:hsa;hsa-mir-335,52,73,+	7.06407	5.06415
hsa-miR-380-3p	23	223	223	6.94	4.97	14:hsa;hsa-mir-380,40,61,+	6.9396	4.97492
hsa-miR-3176	57	219	219	6.82	4.89	16:hsa;hsa-mir-3176,60,78,+	6.81512	4.88568
hsa-miR-195-5p	34	218	212	6.78	4.86	17:hsa;hsa-mir-195,15,35,-	6.59729	4.72952
hsa-miR-501-5p	34	212	212	6.6	4.73	X:hsa;hsa-mir-501,14,35,+	6.59729	4.72952
hsa-miR-25-5p	29	210	210	6.54	4.68	7:hsa;hsa-mir-25,14,34,-	6.53505	4.6849
hsa-miR-33a-5p	29	210	210	6.54	4.68	22:hsa;hsa-mir-33a,6,26,+	6.53505	4.6849
hsa-miR-137	51	208	208	6.47	4.64	1:hsa;hsa-mir-137,59,81,-	6.47281	4.64028
hsa-miR-7976	28	205	205	6.38	4.57	3:hsa;hsa-mir-7976,1,19,-	6.37945	4.57336
hsa-miR-1260b	11	204	204	6.35	4.55	11:hsa;hsa-mir-1260b,10,28,+	6.34833	4.55105
hsa-miR-625-5p	33	200	200	6.22	4.46	14:hsa;hsa-mir-625,15,35,+	6.22385	4.46181
hsa-miR-550a-5p	65	199	98.17	6.19	4.44	7:hsa;hsa-mir-550a-1,22,44,+	3.05487	2.19001
hsa-miR-499a-5p	33	199	199	6.19	4.44	20:hsa;hsa-mir-499a,33,53,+	6.19273	4.4395
hsa-miR-550a-5p	65	199	98.17	6.19	4.44	7:hsa;hsa-mir-550a-2,22,44,+	3.05487	2.19001
hsv1-miR-H14-5p	117	198	99	6.16	4.42	JQ673480:hsv1;hsv1-mir-H14,13,36,-	3.08081	2.2086
hsv1-miR-H14-5p	117	198	99	6.16	4.42	JQ673480:hsv1;hsv1-mir-H14,13,36,+	3.08081	2.2086
hsa-miR-18a-3p	37	194	194	6.04	4.33	13:hsa;hsa-mir-18a,47,69,+	6.03714	4.32796
hsa-miR-23b-5p	32	193	193	6.01	4.31	9:hsa;hsa-mir-23b,20,41,+	6.00602	4.30565
hsa-miR-380-5p	29	191	191	5.94	4.26	14:hsa;hsa-mir-380,5,26,+	5.94378	4.26103
hsa-miR-454-5p	27	191	191	5.94	4.26	17:hsa;hsa-mir-454,24,45,-	5.94378	4.26103
hsa-miR-126-5p	35	189	189	5.88	4.22	9:hsa;hsa-mir-126,15,35,+	5.88154	4.21641
hsa-miR-224-3p	47	189	189	5.88	4.22	X:hsa;hsa-mir-224,53,75,-	5.88154	4.21641
hsa-miR-1260a	17	183	183	5.69	4.08	14:hsa;hsa-mir-1260a,14,31,+	5.69483	4.08256
hsa-miR-370-5p	45	183	183	5.69	4.08	14:hsa;hsa-mir-370,13,34,+	5.69483	4.08256
hsa-miR-32-3p	37	181	181	5.63	4.04	9:hsa;hsa-mir-32,47,68,-	5.63259	4.03794
hsa-miR-3928-3p	37	181	181	5.63	4.04	22:hsa;hsa-mir-3928,37,58,-	5.63259	4.03794
hsa-miR-138-1-3p	51	177	177	5.51	3.95	3:hsa;hsa-mir-138-1,63,84,+	5.50811	3.9487
hsa-miR-188-5p	32	177	177	5.51	3.95	X:hsa;hsa-mir-188,15,35,+	5.50811	3.9487
hsa-miR-652-5p	42	172	172	5.35	3.84	X:hsa;hsa-mir-652,21,45,+	5.35251	3.83716
hsa-miR-585-3p	40	172	172	5.35	3.84	5:hsa;hsa-mir-585,61,79,-	5.35251	3.83716
hsa-miR-1248	37	171	171	5.32	3.81	3:hsa;hsa-mir-1248,4,30,+	5.32139	3.81485
hsa-miR-30c-1-3p	40	169	168.5	5.26	3.77	1:hsa;hsa-mir-30c-1,56,77,+	5.2436	3.75907
hsa-miR-29b-1-5p	43	168	166	5.23	3.75	7:hsa;hsa-mir-29b-1,10,33,-	5.1658	3.7033
hsa-let-7a-2-3p	48	167	166.5	5.2	3.73	11:hsa;hsa-let-7a-2,50,71,-	5.18136	3.71446
hsa-miR-20b-5p	20	167	73.17	5.2	3.73	X:hsa;hsa-mir-20b,6,28,-	2.27689	1.63228
hsv1-miR-H4-5p	63	158	79	4.92	3.52	JQ673480:hsv1;hsv1-mir-H4,9,30,+	2.45842	1.76241
hsv1-miR-H4-5p	63	158	79	4.92	3.52	JQ673480:hsv1;hsv1-mir-H4,9,30,-	2.45842	1.76241
hsa-miR-539-5p	32	154	154	4.79	3.44	14:hsa;hsa-mir-539,9,30,+	4.79237	3.43559
hsa-miR-1249-3p	28	151	151	4.7	3.37	22:hsa;hsa-mir-1249,41,62,-	4.69901	3.36867
hsa-miR-504-5p	30	147	147	4.57	3.28	X:hsa;hsa-mir-504,13,34,-	4.57453	3.27943
hsa-miR-3129-3p	46	143	143	4.45	3.19	2:hsa;hsa-mir-3129,47,68,-	4.45006	3.19019
hsa-miR-659-5p	26	142	142	4.42	3.17	22:hsa;hsa-mir-659,22,43,-	4.41894	3.16789
hsa-miR-197-3p	64	141	141	4.39	3.15	1:hsa;hsa-mir-197,48,69,+	4.38782	3.14558
hsa-miR-200c-3p	26	140	140	4.36	3.12	12:hsa;hsa-mir-200c,44,66,+	4.3567	3.12327
hsa-miR-887-5p	29	135	135	4.2	3.01	5:hsa;hsa-mir-887,10,30,+	4.2011	3.01172
hsa-miR-106a-5p	33	131	56.17	4.08	2.92	X:hsa;hsa-mir-106a,13,35,-	1.74787	1.25302
hsa-miR-496	30	129	129	4.01	2.88	14:hsa;hsa-mir-496,56,77,+	4.01439	2.87787
hsa-miR-200a-3p	27	127	127	3.95	2.83	1:hsa;hsa-mir-200a,54,75,+	3.95215	2.83325
hsa-miR-3167	29	126	126	3.92	2.81	11:hsa;hsa-mir-3167,54,75,-	3.92103	2.81094
hsa-miR-3129-5p	28	125	125	3.89	2.79	2:hsa;hsa-mir-3129,9,30,-	3.88991	2.78863
hsa-miR-6720-3p	20	122	122	3.8	2.72	6:hsa;hsa-mir-6720,67,88,-	3.79655	2.7217
hsa-miR-1271-5p	67	121	121	3.77	2.7	5:hsa;hsa-mir-1271,15,36,+	3.76543	2.69939
hsa-miR-361-5p	79	121	121	3.77	2.7	X:hsa;hsa-mir-361,6,27,-	3.76543	2.69939
hsa-miR-376a-5p	31	120	120	3.73	2.68	14:hsa;hsa-mir-376a-1,7,28,+	3.73431	2.67709
hsa-miR-4746-5p	16	120	120	3.73	2.68	19:hsa;hsa-mir-4746,10,32,+	3.73431	2.67709
hsa-miR-579-5p	26	119	119	3.7	2.65	5:hsa;hsa-mir-579,25,46,-	3.70319	2.65478
hsa-miR-33a-3p	23	118	118	3.67	2.63	22:hsa;hsa-mir-33a,46,67,+	3.67207	2.63247
hsa-miR-326	23	117	117	3.64	2.61	11:hsa;hsa-mir-326,60,79,-	3.64095	2.61016
hsv1-miR-H12	72	117	56.25	3.64	2.61	JQ673480:hsv1;hsv1-mir-H12,53,74,-	1.75046	1.25488
hsv1-miR-H12	72	117	56.25	3.64	2.61	JQ673480:hsv1;hsv1-mir-H12,53,74,+	1.75046	1.25488
hsa-miR-301b-3p	13	115	114.5	3.58	2.57	22:hsa;hsa-mir-301b,45,67,+	3.56316	2.55439
hsa-miR-3912-3p	19	114	114	3.55	2.54	5:hsa;hsa-mir-3912,63,83,-	3.5476	2.54323
hsa-miR-1293	43	112	112	3.49	2.5	12:hsa;hsa-mir-1293,10,31,-	3.48536	2.49861
hsa-miR-1294	19	111	111	3.45	2.48	5:hsa;hsa-mir-1294,48,69,+	3.45424	2.4763
hsa-miR-203a-3p	25	110	110	3.42	2.45	14:hsa;hsa-mir-203a,65,86,+	3.42312	2.454
hsa-miR-769-3p	31	110	110	3.42	2.45	19:hsa;hsa-mir-769,69,91,+	3.42312	2.454
hsa-miR-376c-5p	18	110	68.5	3.42	2.45	14:hsa;hsa-mir-376c,5,25,+	2.13167	1.52817
hsa-miR-3687	70	108	13.5	3.36	2.41	21:hsa;hsa-mir-3687-2,35,58,+	0.42011	0.301172
hsa-miR-3687	70	108	13.5	3.36	2.41	KI270733.1:hsa;hsa-mir-3687-1,35,58,+	0.42011	0.301172
hsa-miR-3687	70	108	13.5	3.36	2.41	21:hsa;hsa-mir-3687-1,35,58,+	0.42011	0.301172
hsa-miR-3687	70	108	13.5	3.36	2.41	KI270733.1:hsa;hsa-mir-3687-2,35,58,+	0.42011	0.301172
hsa-miR-3687	70	108	13.5	3.36	2.41	KI270733.1:hsa;hsa-mir-3687-2,35,58,+	0.42011	0.301172
hsa-miR-1275	29	108	108	3.36	2.41	6:hsa;hsa-mir-1275,18,34,-	3.36088	2.40938
hsa-miR-3687	70	108	13.5	3.36	2.41	KI270733.1:hsa;hsa-mir-3687-1,35,58,+	0.42011	0.301172
hsa-miR-3687	70	108	13.5	3.36	2.41	21:hsa;hsa-mir-3687-2,35,58,+	0.42011	0.301172
hsa-miR-3687	70	108	13.5	3.36	2.41	21:hsa;hsa-mir-3687-1,35,58,+	0.42011	0.301172
hsa-miR-548e-3p	48	106	106	3.3	2.36	10:hsa;hsa-mir-548e,53,74,+	3.29864	2.36476
hsa-miR-181b-3p	31	104	103.5	3.24	2.32	1:hsa;hsa-mir-181b-1,76,96,-	3.22084	2.30899
hsa-miR-1292-5p	44	101	101	3.14	2.25	20:hsa;hsa-mir-1292,3,27,+	3.14305	2.25321
hsa-miR-26b-3p	22	101	101	3.14	2.25	2:hsa;hsa-mir-26b,47,68,+	3.14305	2.25321
hsa-miR-3913-5p	49	100	50	3.11	2.23	12:hsa;hsa-mir-3913-1,23,44,-	1.55596	1.11545
hsa-miR-30b-3p	25	100	100	3.11	2.23	8:hsa;hsa-mir-30b,55,76,-	3.11193	2.2309
hsa-miR-937-3p	39	100	100	3.11	2.23	8:hsa;hsa-mir-937,51,72,-	3.11193	2.2309
hsa-miR-3913-5p	49	100	50	3.11	2.23	12:hsa;hsa-mir-3913-2,22,43,+	1.55596	1.11545
hsa-miR-376b-3p	29	96	95.33	2.99	2.14	14:hsa;hsa-mir-376b,62,83,+	2.9667	2.1268
hsa-miR-664a-5p	36	94	94	2.93	2.1	1:hsa;hsa-mir-664a,11,34,-	2.92521	2.09705
hsa-miR-374c-5p	33	94	50	2.93	2.1	X:hsa;hsa-mir-374c,13,34,+	1.55596	1.11545
hsa-miR-582-5p	21	92	92	2.86	2.05	5:hsa;hsa-mir-582,16,38,-	2.86297	2.05243
hsa-miR-2116-3p	28	91	91	2.83	2.03	15:hsa;hsa-mir-2116,51,71,-	2.83185	2.03012
hsa-miR-1908-5p	27	91	91	2.83	2.03	11:hsa;hsa-mir-1908,12,32,-	2.83185	2.03012
hsa-miR-376b-5p	16	90	48.5	2.8	2.01	14:hsa;hsa-mir-376b,24,45,+	1.50928	1.08199
hsa-miR-490-5p	21	90	90	2.8	2.01	7:hsa;hsa-mir-490,39,58,+	2.80073	2.00781
hsv1-miR-H26	57	90	90	2.8	2.01	JQ673480:hsv1;hsv1-mir-H26,33,52,+	2.80073	2.00781
hsa-miR-744-3p	19	89	89	2.77	1.99	17:hsa;hsa-mir-744,68,89,+	2.76961	1.98551
hsa-miR-486-3p	26	88	48.5	2.74	1.96	8:hsa;hsa-mir-486-1,46,66,-	1.50928	1.08199
hsa-miR-219a-1-3p	34	87	87	2.71	1.94	6:hsa;hsa-mir-219a-1,62,83,+	2.70738	1.94089
hsa-miR-335-5p	16	87	87	2.71	1.94	7:hsa;hsa-mir-335,16,38,+	2.70738	1.94089
hsa-miR-6501-5p	22	87	87	2.71	1.94	21:hsa;hsa-mir-6501,3,24,+	2.70738	1.94089
hsa-miR-99a-3p	27	86	86	2.68	1.92	21:hsa;hsa-mir-99a,50,71,+	2.67626	1.91858
hsa-miR-29b-2-5p	26	83	81	2.58	1.85	1:hsa;hsa-mir-29b-2,11,32,-	2.52066	1.80703
hsa-miR-16-1-3p	16	82	82	2.55	1.83	13:hsa;hsa-mir-16-1,56,77,-	2.55178	1.82934
hsa-miR-450a-2-3p	26	80	80	2.49	1.78	X:hsa;hsa-mir-450a-2,58,79,-	2.48954	1.78472
hsa-miR-766-3p	19	80	80	2.49	1.78	X:hsa;hsa-mir-766,65,86,-	2.48954	1.78472
hsa-miR-4636	18	80	80	2.49	1.78	5:hsa;hsa-mir-4636,10,31,-	2.48954	1.78472
hsa-miR-1291	26	80	80	2.49	1.78	12:hsa;hsa-mir-1291,14,37,-	2.48954	1.78472
hsa-miR-486-3p	23	79	39.5	2.46	1.76	8:hsa;hsa-mir-486-2,43,63,+	1.22921	0.881207
hsa-miR-195-3p	20	79	79	2.46	1.76	17:hsa;hsa-mir-195,53,74,-	2.45842	1.76241
hsa-miR-1306-3p	32	79	79	2.46	1.76	22:hsa;hsa-mir-1306,55,72,+	2.45842	1.76241
hsa-miR-320c	37	79	39.47	2.46	1.76	18:hsa;hsa-mir-320c-1,50,69,+	1.22821	0.88049
hsa-miR-1295a	23	79	79	2.46	1.76	1:hsa;hsa-mir-1295a,49,69,-	2.45842	1.76241
hsa-miR-550a-3p	23	77	25.67	2.4	1.72	7:hsa;hsa-mir-550a-3,60,81,-	0.798728	0.572599
hsa-miR-412-5p	22	77	77	2.4	1.72	14:hsa;hsa-mir-412,19,41,+	2.39618	1.7178
hsa-miR-550a-3p	23	77	25.67	2.4	1.72	7:hsa;hsa-mir-550a-1,61,82,+	0.798728	0.572599
hsa-miR-550a-3p	23	77	25.67	2.4	1.72	7:hsa;hsa-mir-550a-2,61,82,+	0.798728	0.572599
hsa-miR-487a-5p	14	76	76	2.37	1.7	14:hsa;hsa-mir-487a,13,34,+	2.36506	1.69549
hsa-miR-34a-3p	30	76	76	2.37	1.7	1:hsa;hsa-mir-34a,64,85,-	2.36506	1.69549
hsa-miR-1468-5p	18	75	75	2.33	1.67	X:hsa;hsa-mir-1468,13,33,-	2.33395	1.67318
hsa-miR-4775	13	75	75	2.33	1.67	2:hsa;hsa-mir-4775,10,31,+	2.33395	1.67318
hsa-miR-3177-3p	18	75	75	2.33	1.67	16:hsa;hsa-mir-3177,54,74,+	2.33395	1.67318
hsa-miR-3661	25	74	74	2.3	1.65	5:hsa;hsa-mir-3661,21,42,+	2.30283	1.65087
hsa-miR-4791	12	73	73	2.27	1.63	3:hsa;hsa-mir-4791,8,25,-	2.27171	1.62856
hsa-miR-139-5p	21	73	73	2.27	1.63	11:hsa;hsa-mir-139,7,29,-	2.27171	1.62856
hsa-miR-500b-3p	28	72	65.5	2.24	1.61	X:hsa;hsa-mir-500b,51,70,+	2.03831	1.46124
hsa-miR-502-5p	28	71	71	2.21	1.58	X:hsa;hsa-mir-502,16,36,+	2.20947	1.58394
hsa-miR-760	26	71	71	2.21	1.58	1:hsa;hsa-mir-760,49,68,+	2.20947	1.58394
hsa-miR-629-3p	34	70	70	2.18	1.56	15:hsa;hsa-mir-629,61,82,-	2.17835	1.56163
hsv1-miR-H14-3p	55	70	35	2.18	1.56	JQ673480:hsv1;hsv1-mir-H14,56,76,-	1.08917	0.780817
hsv1-miR-H14-3p	55	70	35	2.18	1.56	JQ673480:hsv1;hsv1-mir-H14,56,76,+	1.08917	0.780817
hsa-miR-301a-3p	25	69	68.5	2.15	1.54	17:hsa;hsa-mir-301a,51,73,-	2.13167	1.52817
hsa-miR-497-5p	13	69	69	2.15	1.54	17:hsa;hsa-mir-497,24,44,-	2.14723	1.53932
hsa-miR-3651	20	69	69	2.15	1.54	9:hsa;hsa-mir-3651,64,87,-	2.14723	1.53932
hsa-miR-362-3p	17	69	69	2.15	1.54	X:hsa;hsa-mir-362,42,63,+	2.14723	1.53932
hsa-miR-548ay-3p	15	68	68	2.12	1.52	3:hsa;hsa-mir-548ay,64,85,-	2.11611	1.51702
hsa-miR-1262	28	67	67	2.08	1.49	1:hsa;hsa-mir-1262,14,35,-	2.08499	1.49471
hsa-miR-5701	9	66	5.5	2.05	1.47	15:hsa;hsa-mir-5701-2,10,28,+	0.171156	0.1227
hsa-miR-5701	9	66	5.5	2.05	1.47	KI270727.1:hsa;hsa-mir-5701-1,10,28,+	0.171156	0.1227
hsa-miR-5701	9	66	5.5	2.05	1.47	KI270727.1:hsa;hsa-mir-5701-2,10,28,+	0.171156	0.1227
hsa-miR-5701	9	66	5.5	2.05	1.47	15:hsa;hsa-mir-5701-1,10,28,+	0.171156	0.1227
hsa-miR-5701	9	66	5.5	2.05	1.47	15:hsa;hsa-mir-5701-1,10,28,+	0.171156	0.1227
hsa-miR-5701	9	66	5.5	2.05	1.47	KI270727.1:hsa;hsa-mir-5701-3,10,28,+	0.171156	0.1227
hsa-miR-5701	9	66	5.5	2.05	1.47	15:hsa;hsa-mir-5701-3,10,28,+	0.171156	0.1227
hsa-miR-5701	9	66	5.5	2.05	1.47	15:hsa;hsa-mir-5701-3,10,28,+	0.171156	0.1227
hsa-miR-5701	9	66	5.5	2.05	1.47	15:hsa;hsa-mir-5701-1,10,28,+	0.171156	0.1227
hsa-miR-5701	9	66	5.5	2.05	1.47	15:hsa;hsa-mir-5701-2,10,28,+	0.171156	0.1227
hsa-miR-5701	9	66	5.5	2.05	1.47	15:hsa;hsa-mir-5701-2,10,28,+	0.171156	0.1227
hsa-miR-5701	9	66	5.5	2.05	1.47	15:hsa;hsa-mir-5701-3,10,28,+	0.171156	0.1227
hsa-miR-191-3p	30	64	64	1.99	1.43	3:hsa;hsa-mir-191,58,79,-	1.99163	1.42778
hsa-miR-668-3p	34	64	64	1.99	1.43	14:hsa;hsa-mir-668,43,65,+	1.99163	1.42778
hsa-miR-342-5p	26	63	63	1.96	1.41	14:hsa;hsa-mir-342,19,39,+	1.96051	1.40547
hsa-miR-3138	22	63	63	1.96	1.41	4:hsa;hsa-mir-3138,48,71,-	1.96051	1.40547
hsa-miR-375	20	63	63	1.96	1.41	2:hsa;hsa-mir-375,40,61,-	1.96051	1.40547
hsa-miR-3591-5p	17	63	63	1.96	1.41	18:hsa;hsa-mir-3591,10,32,-	1.96051	1.40547
hsa-miR-210-5p	17	62	62	1.93	1.38	11:hsa;hsa-mir-210,28,49,-	1.92939	1.38316
hsa-miR-34b-5p	27	62	59.5	1.93	1.38	11:hsa;hsa-mir-34b,13,35,+	1.8516	1.32739
hsv1-mir-H28	48	62	15.5	1.93	1.38	JQ673480:hsv1;hsv1-mir-H28a,13,30,+	0.482349	0.34579
hsv1-mir-H28a	48	62	15.5	1.93	1.38	JQ673480:hsv1;hsv1-mir-H28a,13,30,+	0.482349	0.34579
hsv1-mir-H28	48	62	15.5	1.93	1.38	JQ673480:hsv1;hsv1-mir-H28,13,30,+	0.482349	0.34579
hsv1-mir-H28a	48	62	15.5	1.93	1.38	JQ673480:hsv1;hsv1-mir-H28,13,30,+	0.482349	0.34579
hsa-miR-5582-3p	23	61	61	1.9	1.36	11:hsa;hsa-mir-5582,47,68,-	1.89828	1.36085
hsa-miR-142-3p	22	60	60	1.87	1.34	17:hsa;hsa-mir-142,52,74,-	1.86716	1.33854
hsa-miR-1270	21	59	59	1.84	1.32	19:hsa;hsa-mir-1270,13,35,-	1.83604	1.31623
hsa-miR-505-5p	19	59	59	1.84	1.32	X:hsa;hsa-mir-505,15,36,-	1.83604	1.31623
hsa-miR-328-3p	44	59	59	1.84	1.32	16:hsa;hsa-mir-328,48,69,-	1.83604	1.31623
hsa-miR-2355-5p	17	59	59	1.84	1.32	2:hsa;hsa-mir-2355,11,31,-	1.83604	1.31623
hsa-miR-128-1-5p	17	59	59	1.84	1.32	2:hsa;hsa-mir-128-1,15,37,+	1.83604	1.31623
hsa-miR-98-3p	25	58	58	1.8	1.29	X:hsa;hsa-mir-98,80,101,-	1.80492	1.29392
hsa-miR-5001-3p	24	57	57	1.77	1.27	2:hsa;hsa-mir-5001,60,81,-	1.7738	1.27162
hsv1-mir-H29	43	55	13.75	1.71	1.23	JQ673480:hsv1;hsv1-mir-H29,141,162,+	0.42789	0.306749
hsv1-mir-H29a	43	55	13.75	1.71	1.23	JQ673480:hsv1;hsv1-mir-H29,141,162,+	0.42789	0.306749
hsa-miR-3128	15	55	55	1.71	1.23	2:hsa;hsa-mir-3128,5,27,-	1.71156	1.227
hsv1-mir-H29	43	55	13.75	1.71	1.23	JQ673480:hsv1;hsv1-mir-H29a,141,162,+	0.42789	0.306749
hsv1-mir-H29a	43	55	13.75	1.71	1.23	JQ673480:hsv1;hsv1-mir-H29a,141,162,+	0.42789	0.306749
hsa-miR-363-3p	20	54	54	1.68	1.2	X:hsa;hsa-mir-363,50,71,-	1.68044	1.20469
hsa-miR-664b-3p	12	54	54	1.68	1.2	X:hsa;hsa-mir-664b,40,61,+	1.68044	1.20469
hsa-miR-3174	22	54	54	1.68	1.2	15:hsa;hsa-mir-3174,10,32,+	1.68044	1.20469
hsa-miR-3605-3p	21	54	54	1.68	1.2	1:hsa;hsa-mir-3605,66,88,-	1.68044	1.20469
hsa-miR-580-3p	12	53	53	1.65	1.18	5:hsa;hsa-mir-580,61,82,-	1.64932	1.18238
hsa-miR-122-5p	13	53	53	1.65	1.18	18:hsa;hsa-mir-122,15,36,+	1.64932	1.18238
hsa-miR-624-5p	17	52	52	1.62	1.16	14:hsa;hsa-mir-624,16,37,-	1.6182	1.16007
hsa-miR-449c-5p	22	52	52	1.62	1.16	5:hsa;hsa-mir-449c,17,41,-	1.6182	1.16007
hsa-miR-3074-5p	16	51	51	1.59	1.14	9:hsa;hsa-mir-3074,12,32,-	1.58708	1.13776
hsv1-miR-H13	31	51	25.25	1.59	1.14	JQ673480:hsv1;hsv1-mir-H13,39,61,+	0.785762	0.563304
hsa-miR-26a-2-3p	14	51	51	1.59	1.14	12:hsa;hsa-mir-26a-2,52,73,-	1.58708	1.13776
hsv1-miR-H13	31	51	25.25	1.59	1.14	JQ673480:hsv1;hsv1-mir-H13,39,61,-	0.785762	0.563304
hsa-miR-320c	26	50	13.97	1.56	1.12	18:hsa;hsa-mir-320c-2,31,50,+	0.43467	0.31161
hsa-miR-5699-3p	16	50	50	1.56	1.12	10:hsa;hsa-mir-5699,59,80,-	1.55596	1.11545
hsa-miR-28-5p	24	49	49	1.52	1.09	3:hsa;hsa-mir-28,14,35,+	1.52484	1.09314
hsa-miR-940	24	49	49	1.52	1.09	16:hsa;hsa-mir-940,60,80,+	1.52484	1.09314
hsa-miR-3609	28	49	49	1.52	1.09	7:hsa;hsa-mir-3609,51,74,+	1.52484	1.09314
hsa-miR-6724-5p	30	48	1.71	1.49	1.07	21:hsa;hsa-mir-6724-4,11,33,+	0.0533473	0.0382441
hsa-miR-550a-3-5p	15	48	42.67	1.49	1.07	7:hsa;hsa-mir-550a-3,21,40,-	1.32776	0.951853
hsa-miR-6724-5p	30	48	1.71	1.49	1.07	21:hsa;hsa-mir-6724-4,11,33,+	0.0533473	0.0382441
hsa-miR-23a-5p	20	48	48	1.49	1.07	19:hsa;hsa-mir-23a,9,30,-	1.49372	1.07083
hsa-miR-6724-5p	30	48	1.71	1.49	1.07	21:hsa;hsa-mir-6724-4,11,33,+	0.0533473	0.0382441
hsa-miR-6724-5p	30	48	1.71	1.49	1.07	21:hsa;hsa-mir-6724-2,11,33,+	0.0533473	0.0382441
hsa-miR-6724-5p	30	48	1.71	1.49	1.07	GL000220.1:hsa;hsa-mir-6724-1,11,33,+	0.0533473	0.0382441
hsa-miR-6724-5p	30	48	1.71	1.49	1.07	GL000220.1:hsa;hsa-mir-6724-3,11,33,+	0.0533473	0.0382441
hsa-miR-6724-5p	30	48	1.71	1.49	1.07	GL000220.1:hsa;hsa-mir-6724-3,11,33,+	0.0533473	0.0382441
hsa-miR-6724-5p	30	48	1.71	1.49	1.07	21:hsa;hsa-mir-6724-3,11,33,+	0.0533473	0.0382441
hsa-miR-6724-5p	30	48	1.71	1.49	1.07	GL000220.1:hsa;hsa-mir-6724-2,11,33,+	0.0533473	0.0382441
hsa-miR-6724-5p	30	48	1.71	1.49	1.07	21:hsa;hsa-mir-6724-1,11,33,+	0.0533473	0.0382441
hsa-miR-6724-5p	30	48	1.71	1.49	1.07	21:hsa;hsa-mir-6724-2,11,33,+	0.0533473	0.0382441
hsa-miR-6724-5p	30	48	1.71	1.49	1.07	GL000220.1:hsa;hsa-mir-6724-1,11,33,+	0.0533473	0.0382441
hsa-miR-6724-5p	30	48	1.71	1.49	1.07	KI270733.1:hsa;hsa-mir-6724-1,11,33,+	0.0533473	0.0382441
hsa-miR-6724-5p	30	48	1.71	1.49	1.07	KI270733.1:hsa;hsa-mir-6724-4,11,33,+	0.0533473	0.0382441
hsa-miR-6724-5p	30	48	1.71	1.49	1.07	KI270733.1:hsa;hsa-mir-6724-3,11,33,+	0.0533473	0.0382441
hsa-miR-6724-5p	30	48	1.71	1.49	1.07	21:hsa;hsa-mir-6724-4,11,33,+	0.0533473	0.0382441
hsa-miR-6724-5p	30	48	1.71	1.49	1.07	21:hsa;hsa-mir-6724-3,11,33,+	0.0533473	0.0382441
hsa-miR-6724-5p	30	48	1.71	1.49	1.07	21:hsa;hsa-mir-6724-2,11,33,+	0.0533473	0.0382441
hsa-miR-6724-5p	30	48	1.71	1.49	1.07	GL000220.1:hsa;hsa-mir-6724-4,11,33,+	0.0533473	0.0382441
hsa-miR-6724-5p	30	48	1.71	1.49	1.07	21:hsa;hsa-mir-6724-3,11,33,+	0.0533473	0.0382441
hsa-miR-6724-5p	30	48	1.71	1.49	1.07	21:hsa;hsa-mir-6724-2,11,33,+	0.0533473	0.0382441
hsa-miR-6724-5p	30	48	1.71	1.49	1.07	21:hsa;hsa-mir-6724-1,11,33,+	0.0533473	0.0382441
hsa-miR-6724-5p	30	48	1.71	1.49	1.07	21:hsa;hsa-mir-6724-1,11,33,+	0.0533473	0.0382441
hsa-miR-6724-5p	30	48	1.71	1.49	1.07	21:hsa;hsa-mir-6724-3,11,33,+	0.0533473	0.0382441
hsa-miR-6724-5p	30	48	1.71	1.49	1.07	GL000220.1:hsa;hsa-mir-6724-4,11,33,+	0.0533473	0.0382441
hsa-miR-6724-5p	30	48	1.71	1.49	1.07	21:hsa;hsa-mir-6724-1,11,33,+	0.0533473	0.0382441
hsa-miR-6724-5p	30	48	1.71	1.49	1.07	GL000220.1:hsa;hsa-mir-6724-2,11,33,+	0.0533473	0.0382441
hsa-miR-6724-5p	30	48	1.71	1.49	1.07	KI270733.1:hsa;hsa-mir-6724-2,11,33,+	0.0533473	0.0382441
hsa-miR-153-3p	8	47	23.5	1.46	1.05	2:hsa;hsa-mir-153-1,54,75,-	0.731303	0.524263
hsa-miR-153-3p	8	47	23.5	1.46	1.05	7:hsa;hsa-mir-153-2,53,74,-	0.731303	0.524263
hsa-miR-196b-3p	15	47	47	1.46	1.05	7:hsa;hsa-mir-196b,50,71,-	1.46261	1.04853
hsa-miR-5000-3p	21	47	47	1.46	1.05	2:hsa;hsa-mir-5000,62,83,+	1.46261	1.04853
hsa-miR-1343-3p	14	46	46	1.43	1.03	11:hsa;hsa-mir-1343,52,73,+	1.43149	1.02622
hsa-miR-483-3p	23	46	46	1.43	1.03	11:hsa;hsa-mir-483,48,68,-	1.43149	1.02622
hsa-miR-597-3p	21	46	46	1.43	1.03	8:hsa;hsa-mir-597,58,80,+	1.43149	1.02622
hsa-let-7g-3p	16	45	45	1.4	1	3:hsa;hsa-let-7g,62,82,-	1.40037	1.00391
hsa-miR-3173-5p	8	45	45	1.4	1	14:hsa;hsa-mir-3173,5,26,-	1.40037	1.00391
hsa-miR-142-5p	12	45	45	1.4	1	17:hsa;hsa-mir-142,16,36,-	1.40037	1.00391
hsa-miR-100-3p	13	44	44	1.37	0.98	11:hsa;hsa-mir-100,48,69,-	1.36925	0.981598
hsa-miR-3688-3p	20	43	22	1.34	0.96	4:hsa;hsa-mir-3688-1,60,81,-	0.684624	0.490799
hsa-miR-3154	16	43	43	1.34	0.96	9:hsa;hsa-mir-3154,54,75,-	1.33813	0.959289
hsa-miR-708-5p	29	43	43	1.34	0.96	11:hsa;hsa-mir-708,11,33,-	1.33813	0.959289
hsa-miR-491-5p	16	42	42	1.31	0.94	9:hsa;hsa-mir-491,16,37,+	1.30701	0.93698
hsa-miR-3688-3p	19	42	21	1.31	0.94	4:hsa;hsa-mir-3688-2,57,78,+	0.653505	0.46849
hsa-miR-3662	12	41	41	1.28	0.91	6:hsa;hsa-mir-3662,55,78,-	1.27589	0.914671
hsa-miR-1298-5p	13	41	41	1.28	0.91	X:hsa;hsa-mir-1298,18,39,+	1.27589	0.914671
hsa-miR-4684-3p	12	41	41	1.28	0.91	1:hsa;hsa-mir-4684,50,71,+	1.27589	0.914671
hsv1-miR-H7-3p	23	41	20.5	1.28	0.91	JQ673480:hsv1;hsv1-mir-H7,51,71,+	0.637945	0.457336
hsa-miR-628-5p	15	41	41	1.28	0.91	15:hsa;hsa-mir-628,23,44,-	1.27589	0.914671
hsv1-miR-H7-3p	23	41	20.5	1.28	0.91	JQ673480:hsv1;hsv1-mir-H7,51,71,-	0.637945	0.457336
hsv1-miR-H8a-5p	22	41	20.5	1.28	0.91	JQ673480:hsv1;hsv1-mir-H8a,10,29,+	0.637945	0.457336
hsv1-miR-H8a-5p	22	41	20.5	1.28	0.91	JQ673480:hsv1;hsv1-mir-H8a,10,29,-	0.637945	0.457336
hsa-miR-605-3p	16	40	40	1.24	0.89	10:hsa;hsa-mir-605,51,72,+	1.24477	0.892362
hsa-miR-6130	4	40	22	1.24	0.89	21:hsa;hsa-mir-6130,71,89,+	0.684624	0.490799
hsa-miR-665	9	40	40	1.24	0.89	14:hsa;hsa-mir-665,43,62,+	1.24477	0.892362
hsa-miR-3691-5p	27	40	40	1.24	0.89	6:hsa;hsa-mir-3691,15,37,-	1.24477	0.892362
hsa-miR-3200-3p	11	40	40	1.24	0.89	22:hsa;hsa-mir-3200,54,75,+	1.24477	0.892362
hsv1-miR-H8a-3p	32	40	10	1.24	0.89	JQ673480:hsv1;hsv1-mir-H8a,48,67,+	0.311193	0.22309
hsv1-miR-H8-3p	32	40	10	1.24	0.89	JQ673480:hsv1;hsv1-mir-H8a,48,67,+	0.311193	0.22309
hsv1-miR-H8a-3p	32	40	10	1.24	0.89	JQ673480:hsv1;hsv1-mir-H8a,48,67,-	0.311193	0.22309
hsv1-miR-H8-3p	32	40	10	1.24	0.89	JQ673480:hsv1;hsv1-mir-H8a,48,67,-	0.311193	0.22309
hsa-miR-542-5p	14	39	39	1.21	0.87	X:hsa;hsa-mir-542,16,38,-	1.21365	0.870053
hsa-miR-20a-3p	17	39	39	1.21	0.87	13:hsa;hsa-mir-20a,44,65,+	1.21365	0.870053
hsa-miR-219a-5p	17	38	37.5	1.18	0.85	6:hsa;hsa-mir-219a-1,21,41,+	1.16697	0.836589
hsa-miR-6866-5p	15	38	38	1.18	0.85	17:hsa;hsa-mir-6866,6,28,+	1.18253	0.847744
hsa-miR-605-5p	20	37	37	1.15	0.83	10:hsa;hsa-mir-605,16,38,+	1.15141	0.825435
hsa-miR-429	7	37	37	1.15	0.83	1:hsa;hsa-mir-429,51,72,+	1.15141	0.825435
hsa-miR-3170	12	37	37	1.15	0.83	13:hsa;hsa-mir-3170,10,31,+	1.15141	0.825435
hsa-miR-6852-5p	14	37	37	1.15	0.83	9:hsa;hsa-mir-6852,6,26,-	1.15141	0.825435
hsa-let-7c-3p	14	36	35.5	1.12	0.8	21:hsa;hsa-let-7c,56,77,+	1.10473	0.791971
hsa-miR-4717-3p	23	36	36	1.12	0.8	16:hsa;hsa-mir-4717,42,62,+	1.12029	0.803126
hsa-miR-346	16	36	36	1.12	0.8	10:hsa;hsa-mir-346,20,42,-	1.12029	0.803126
hsa-miR-548o-3p	15	35	17.17	1.09	0.78	7:hsa;hsa-mir-548o,87,108,-	0.534214	0.382972
hsa-miR-548o-3p	15	35	17.17	1.09	0.78	20:hsa;hsa-mir-548o-2,45,66,+	0.534214	0.382972
hsa-miR-194-3p	15	35	35	1.09	0.78	11:hsa;hsa-mir-194-2,51,72,-	1.08917	0.780817
hsa-miR-1257	14	34	34	1.06	0.76	20:hsa;hsa-mir-1257,22,42,-	1.05806	0.758508
hsa-miR-3179	9	33	2.06	1.03	0.74	16:hsa;hsa-mir-3179-4,52,73,-	0.0641835	0.0460124
hsa-miR-3179	9	33	2.06	1.03	0.74	16:hsa;hsa-mir-3179-4,52,73,-	0.0641835	0.0460124
hsa-miR-3179	9	33	2.06	1.03	0.74	16:hsa;hsa-mir-3179-3,52,73,+	0.0641835	0.0460124
hsa-miR-3179	9	33	2.06	1.03	0.74	16:hsa;hsa-mir-3179-1,52,73,-	0.0641835	0.0460124
hsa-miR-324-3p	26	33	33	1.03	0.74	17:hsa;hsa-mir-324,53,72,-	1.02694	0.736199
hsa-miR-3179	9	33	2.06	1.03	0.74	16:hsa;hsa-mir-3179-4,52,73,+	0.0641835	0.0460124
hsa-miR-541-3p	10	33	33	1.03	0.74	14:hsa;hsa-mir-541,54,75,+	1.02694	0.736199
hsa-miR-3179	9	33	2.06	1.03	0.74	16:hsa;hsa-mir-3179-1,52,73,+	0.0641835	0.0460124
hsa-miR-3179	9	33	2.06	1.03	0.74	16:hsa;hsa-mir-3179-2,52,73,-	0.0641835	0.0460124
hsa-miR-3179	9	33	2.06	1.03	0.74	16:hsa;hsa-mir-3179-3,52,73,-	0.0641835	0.0460124
hsa-miR-3179	9	33	2.06	1.03	0.74	16:hsa;hsa-mir-3179-2,52,73,-	0.0641835	0.0460124
hsa-miR-3179	9	33	2.06	1.03	0.74	16:hsa;hsa-mir-3179-4,52,73,+	0.0641835	0.0460124
hsa-miR-3179	9	33	2.06	1.03	0.74	16:hsa;hsa-mir-3179-2,52,73,+	0.0641835	0.0460124
hsa-miR-3130-5p	15	33	19.5	1.03	0.74	2:hsa;hsa-mir-3130-2,13,33,+	0.606826	0.435026
hsa-miR-3179	9	33	2.06	1.03	0.74	16:hsa;hsa-mir-3179-1,52,73,+	0.0641835	0.0460124
hsa-miR-3179	9	33	2.06	1.03	0.74	16:hsa;hsa-mir-3179-1,52,73,-	0.0641835	0.0460124
hsa-miR-3179	9	33	2.06	1.03	0.74	16:hsa;hsa-mir-3179-2,52,73,+	0.0641835	0.0460124
hsa-miR-3605-5p	14	33	33	1.03	0.74	1:hsa;hsa-mir-3605,22,44,-	1.02694	0.736199
hsa-miR-3179	9	33	2.06	1.03	0.74	16:hsa;hsa-mir-3179-3,52,73,+	0.0641835	0.0460124
hsa-miR-3179	9	33	2.06	1.03	0.74	16:hsa;hsa-mir-3179-3,52,73,-	0.0641835	0.0460124
hsa-miR-1185-5p	11	32	16	1	0.71	14:hsa;hsa-mir-1185-1,15,35,+	0.497908	0.356945
hsa-miR-1185-5p	11	32	16	1	0.71	14:hsa;hsa-mir-1185-2,15,35,+	0.497908	0.356945
hsa-miR-5699-5p	13	32	32	1	0.71	10:hsa;hsa-mir-5699,10,31,-	0.995817	0.71389
hsa-miR-4676-3p	15	32	32	1	0.71	10:hsa;hsa-mir-4676,44,65,+	0.995817	0.71389
hsa-miR-6716-3p	14	31	31	0.96	0.69	11:hsa;hsa-mir-6716,49,70,+	0.964697	0.691581
hsa-miR-4661-5p	12	31	31	0.96	0.69	8:hsa;hsa-mir-4661,10,31,+	0.964697	0.691581
hsa-miR-1245a	20	31	31	0.96	0.69	2:hsa;hsa-mir-1245a,45,65,+	0.964697	0.691581
hsa-miR-581	20	31	31	0.96	0.69	5:hsa;hsa-mir-581,16,36,-	0.964697	0.691581
hsa-miR-146a-3p	8	29	29	0.9	0.65	5:hsa;hsa-mir-146a,57,78,+	0.902459	0.646962
hsa-miR-579-3p	10	29	29	0.9	0.65	5:hsa;hsa-mir-579,62,84,-	0.902459	0.646962
hsa-miR-4785	10	29	29	0.9	0.65	2:hsa;hsa-mir-4785,44,64,-	0.902459	0.646962
hsa-miR-6733-5p	13	29	29	0.9	0.65	1:hsa;hsa-mir-6733,6,27,-	0.902459	0.646962
hsa-miR-190b	13	29	29	0.9	0.65	1:hsa;hsa-mir-190b,11,31,-	0.902459	0.646962
hsa-miR-1228-3p	13	29	29	0.9	0.65	12:hsa;hsa-mir-1228,52,71,+	0.902459	0.646962
hsa-miR-660-3p	10	29	29	0.9	0.65	X:hsa;hsa-mir-660,52,72,+	0.902459	0.646962
hsa-miR-5000-5p	9	29	29	0.9	0.65	2:hsa;hsa-mir-5000,24,45,+	0.902459	0.646962
hsa-miR-3187-3p	24	28	28	0.87	0.62	19:hsa;hsa-mir-3187,44,63,+	0.87134	0.624653
hsa-miR-450a-1-3p	13	28	28	0.87	0.62	X:hsa;hsa-mir-450a-1,53,74,-	0.87134	0.624653
hsa-miR-372-3p	11	28	28	0.87	0.62	19:hsa;hsa-mir-372,42,64,+	0.87134	0.624653
hsa-miR-3130-5p	12	28	14.5	0.87	0.62	2:hsa;hsa-mir-3130-1,13,33,-	0.451229	0.323481
hsa-miR-3148	16	28	28	0.87	0.62	8:hsa;hsa-mir-3148,10,31,-	0.87134	0.624653
hsa-miR-4787-3p	18	28	28	0.87	0.62	3:hsa;hsa-mir-4787,51,74,+	0.87134	0.624653
hsa-miR-219b-5p	6	28	28	0.87	0.62	9:hsa;hsa-mir-219b,14,35,+	0.87134	0.624653
hsa-miR-3065-5p	10	27	27	0.84	0.6	17:hsa;hsa-mir-3065,10,32,+	0.84022	0.602344
hsa-miR-4461	23	27	27	0.84	0.6	5:hsa;hsa-mir-4461,46,68,+	0.84022	0.602344
hsa-miR-628-3p	14	27	27	0.84	0.6	15:hsa;hsa-mir-628,61,81,-	0.84022	0.602344
hsa-miR-3190-3p	15	27	27	0.84	0.6	19:hsa;hsa-mir-3190,47,69,+	0.84022	0.602344
hsa-miR-6515-5p	9	26	26	0.81	0.58	19:hsa;hsa-mir-6515,3,23,+	0.809101	0.580035
hsa-miR-590-3p	21	26	26	0.81	0.58	7:hsa;hsa-mir-590,56,76,+	0.809101	0.580035
hsa-miR-9-3p	8	26	9.33	0.81	0.58	15:hsa;hsa-mir-9-3,55,76,+	0.290447	0.208218
hsa-miR-23c	16	26	18.83	0.81	0.58	X:hsa;hsa-mir-23c,66,87,-	0.58608	0.420154
hsa-miR-708-3p	20	26	26	0.81	0.58	11:hsa;hsa-mir-708,57,78,-	0.809101	0.580035
hsa-miR-4677-5p	17	26	26	0.81	0.58	1:hsa;hsa-mir-4677,13,34,+	0.809101	0.580035
hsa-miR-9-3p	7	25	8.33	0.78	0.56	5:hsa;hsa-mir-9-2,53,74,-	0.259327	0.185909
hsa-miR-6513-3p	7	25	25	0.78	0.56	2:hsa;hsa-mir-6513,42,62,-	0.777982	0.557726
hsa-miR-4435	9	25	6.25	0.78	0.56	2:hsa;hsa-mir-4435-2,5,26,-	0.194495	0.139432
hsa-miR-4435	9	25	6.25	0.78	0.56	2:hsa;hsa-mir-4435-1,10,31,+	0.194495	0.139432
hsa-miR-4474-3p	12	25	25	0.78	0.56	9:hsa;hsa-mir-4474,45,66,-	0.777982	0.557726
hsa-miR-4797-3p	17	25	25	0.78	0.56	3:hsa;hsa-mir-4797,41,61,-	0.777982	0.557726
hsa-miR-4435	9	25	6.25	0.78	0.56	2:hsa;hsa-mir-4435-1,10,31,-	0.194495	0.139432
hsa-miR-4470	10	25	25	0.78	0.56	8:hsa;hsa-mir-4470,45,65,+	0.777982	0.557726
hsa-miR-9-3p	7	25	8.33	0.78	0.56	1:hsa;hsa-mir-9-1,55,76,-	0.259327	0.185909
hsa-miR-4435	9	25	6.25	0.78	0.56	2:hsa;hsa-mir-4435-2,5,26,+	0.194495	0.139432
hsa-miR-589-3p	18	24	24	0.75	0.54	7:hsa;hsa-mir-589,61,84,-	0.746862	0.535417
hsa-miR-1910-5p	15	23	23	0.72	0.51	16:hsa;hsa-mir-1910,12,32,-	0.715743	0.513108
hsa-miR-4683	10	23	23	0.72	0.51	10:hsa;hsa-mir-4683,50,72,-	0.715743	0.513108
hsa-miR-151a-5p	11	23	20.5	0.72	0.51	8:hsa;hsa-mir-151a,11,31,-	0.637945	0.457336
hsa-miR-548k	15	23	23	0.72	0.51	11:hsa;hsa-mir-548k,32,53,+	0.715743	0.513108
hsa-miR-4659a-3p	11	22	21.5	0.68	0.49	8:hsa;hsa-mir-4659a,49,70,+	0.669064	0.479645
hsa-miR-4645-3p	13	22	22	0.68	0.49	6:hsa;hsa-mir-4645,47,68,-	0.684624	0.490799
hsa-miR-329-5p	16	22	11	0.68	0.49	14:hsa;hsa-mir-329-1,13,35,+	0.342312	0.2454
hsa-miR-329-5p	16	22	11	0.68	0.49	14:hsa;hsa-mir-329-2,15,37,+	0.342312	0.2454
hsa-miR-3944-3p	13	22	22	0.68	0.49	10:hsa;hsa-mir-3944,63,85,-	0.684624	0.490799
hsa-miR-577	9	21	21	0.65	0.47	4:hsa;hsa-mir-577,16,36,+	0.653505	0.46849
hsa-miR-2276-3p	10	21	21	0.65	0.47	13:hsa;hsa-mir-2276,54,75,+	0.653505	0.46849
hsa-miR-541-5p	16	21	21	0.65	0.47	14:hsa;hsa-mir-541,10,34,+	0.653505	0.46849
hsa-miR-488-3p	12	21	21	0.65	0.47	1:hsa;hsa-mir-488,52,72,-	0.653505	0.46849
hsa-miR-770-5p	12	21	21	0.65	0.47	14:hsa;hsa-mir-770,20,42,+	0.653505	0.46849
hsa-miR-556-5p	8	21	21	0.65	0.47	1:hsa;hsa-mir-556,16,37,+	0.653505	0.46849
hsa-miR-3180-3p	16	20	1.55	0.62	0.45	16:hsa;hsa-mir-3180-3,62,83,-	0.048311	0.0346336
hsa-miR-3180-3p	16	20	1.55	0.62	0.45	16:hsa;hsa-mir-3180-2,58,79,-	0.048311	0.0346336
hsa-miR-215-3p	8	20	20	0.62	0.45	1:hsa;hsa-mir-215,64,86,-	0.622385	0.446181
hsa-miR-4781-3p	19	20	20	0.62	0.45	1:hsa;hsa-mir-4781,46,67,+	0.622385	0.446181
hsa-miR-3622a-5p	14	20	20	0.62	0.45	8:hsa;hsa-mir-3622a,14,35,+	0.622385	0.446181
hsa-miR-3180-3p	16	20	1.55	0.62	0.45	16:hsa;hsa-mir-3180-4,36,57,-	0.048311	0.0346336
hsa-miR-3180-3p	16	20	1.55	0.62	0.45	16:hsa;hsa-mir-3180-3,62,83,+	0.048311	0.0346336
hsa-miR-3180-3p	16	20	1.55	0.62	0.45	16:hsa;hsa-mir-3180-1,62,83,-	0.048311	0.0346336
hsa-miR-3180-3p	16	20	1.55	0.62	0.45	16:hsa;hsa-mir-3180-1,62,83,+	0.048311	0.0346336
hsa-miR-3180-3p	16	20	1.55	0.62	0.45	16:hsa;hsa-mir-3180-2,58,79,+	0.048311	0.0346336
hsa-miR-3180-3p	16	20	1.55	0.62	0.45	16:hsa;hsa-mir-3180-3,62,83,+	0.048311	0.0346336
hsa-miR-4423-3p	10	20	20	0.62	0.45	1:hsa;hsa-mir-4423,49,69,+	0.622385	0.446181
hsa-miR-3180-3p	16	20	1.55	0.62	0.45	16:hsa;hsa-mir-3180-2,58,79,+	0.048311	0.0346336
hsa-miR-3180-3p	16	20	1.55	0.62	0.45	16:hsa;hsa-mir-3180-5,36,57,-	0.048311	0.0346336
hsa-miR-487b-5p	11	20	20	0.62	0.45	14:hsa;hsa-mir-487b,15,36,+	0.622385	0.446181
hsa-miR-3180-3p	16	20	1.55	0.62	0.45	16:hsa;hsa-mir-3180-1,62,83,+	0.048311	0.0346336
hsa-miR-590-5p	6	19	19	0.59	0.42	7:hsa;hsa-mir-590,16,37,+	0.591266	0.423872
hsa-miR-187-3p	12	19	19	0.59	0.42	18:hsa;hsa-mir-187,71,92,-	0.591266	0.423872
hsa-miR-6720-5p	16	19	19	0.59	0.42	6:hsa;hsa-mir-6720,31,53,-	0.591266	0.423872
hsv1-miR-H16	19	19	19	0.59	0.42	JQ673480:hsv1;hsv1-mir-H16,23,44,+	0.591266	0.423872
hsa-miR-3180	15	19	1.46	0.59	0.42	16:hsa;hsa-mir-3180-4,36,54,-	0.045482	0.0326055
hsa-miR-378a-5p	16	19	19	0.59	0.42	5:hsa;hsa-mir-378a,5,26,+	0.591266	0.423872
hsa-miR-4725-3p	11	19	19	0.59	0.42	17:hsa;hsa-mir-4725,58,79,+	0.591266	0.423872
hsa-miR-3180	15	19	1.46	0.59	0.42	16:hsa;hsa-mir-3180-5,36,54,-	0.045482	0.0326055
hsa-miR-642a-5p	9	19	19	0.59	0.42	19:hsa;hsa-mir-642a,16,37,+	0.591266	0.423872
hsa-miR-942-3p	12	18	18	0.56	0.4	1:hsa;hsa-mir-942,53,74,+	0.560147	0.401563
hsa-miR-103a-2-5p	9	18	18	0.56	0.4	20:hsa;hsa-mir-103a-2,11,33,+	0.560147	0.401563
hsa-miR-933	11	18	18	0.56	0.4	2:hsa;hsa-mir-933,47,68,-	0.560147	0.401563
hsa-miR-3677-5p	9	18	18	0.56	0.4	16:hsa;hsa-mir-3677,3,24,+	0.560147	0.401563
hsa-miR-4796-5p	4	18	18	0.56	0.4	3:hsa;hsa-mir-4796,9,30,-	0.560147	0.401563
hsa-miR-3136-5p	9	18	18	0.56	0.4	3:hsa;hsa-mir-3136,10,32,-	0.560147	0.401563
hsa-miR-592	4	18	18	0.56	0.4	7:hsa;hsa-mir-592,16,37,-	0.560147	0.401563
hsa-miR-576-5p	14	18	18	0.56	0.4	4:hsa;hsa-mir-576,16,37,+	0.560147	0.401563
hsa-miR-548al	13	18	18	0.56	0.4	11:hsa;hsa-mir-548al,65,86,+	0.560147	0.401563
hsa-miR-190a-5p	16	18	18	0.56	0.4	15:hsa;hsa-mir-190a,15,36,+	0.560147	0.401563
hsa-miR-511-5p	10	18	18	0.56	0.4	10:hsa;hsa-mir-511,16,36,+	0.560147	0.401563
hsa-miR-6840-5p	14	17	17	0.53	0.38	7:hsa;hsa-mir-6840,6,29,+	0.529028	0.379254
hsa-miR-2277-3p	13	17	17	0.53	0.38	5:hsa;hsa-mir-2277,59,79,-	0.529028	0.379254
hsa-miR-5581-3p	12	17	17	0.53	0.38	1:hsa;hsa-mir-5581,39,60,-	0.529028	0.379254
hsa-miR-4709-5p	7	17	17	0.53	0.38	14:hsa;hsa-mir-4709,9,30,-	0.529028	0.379254
hsa-miR-33b-3p	7	17	17	0.53	0.38	17:hsa;hsa-mir-33b,54,75,-	0.529028	0.379254
hsa-miR-134-3p	12	17	17	0.53	0.38	14:hsa;hsa-mir-134,46,68,+	0.529028	0.379254
hsa-miR-4511	14	17	17	0.53	0.38	15:hsa;hsa-mir-4511,15,36,-	0.529028	0.379254
hsa-miR-4423-5p	6	17	17	0.53	0.38	1:hsa;hsa-mir-4423,13,34,+	0.529028	0.379254
hsa-miR-200a-5p	5	17	17	0.53	0.38	1:hsa;hsa-mir-200a,16,37,+	0.529028	0.379254
hsa-miR-1226-3p	4	16	16	0.5	0.36	3:hsa;hsa-mir-1226,54,75,+	0.497908	0.356945
hsa-miR-4709-3p	8	16	16	0.5	0.36	14:hsa;hsa-mir-4709,48,70,-	0.497908	0.356945
hsa-miR-522-3p	8	16	16	0.5	0.36	19:hsa;hsa-mir-522,54,75,+	0.497908	0.356945
hsa-miR-4690-3p	7	16	16	0.5	0.36	11:hsa;hsa-mir-4690,39,59,+	0.497908	0.356945
hsa-miR-3684	9	16	16	0.5	0.36	4:hsa;hsa-mir-3684,48,68,+	0.497908	0.356945
hsa-miR-573	9	16	16	0.5	0.36	4:hsa;hsa-mir-573,16,39,-	0.497908	0.356945
hsa-miR-4999-5p	13	16	16	0.5	0.36	19:hsa;hsa-mir-4999,21,41,-	0.497908	0.356945
hsa-miR-500a-5p	16	16	14	0.5	0.36	X:hsa;hsa-mir-500a,13,35,+	0.43567	0.312327
hsa-miR-889-5p	10	16	16	0.5	0.36	14:hsa;hsa-mir-889,11,32,+	0.497908	0.356945
hsa-miR-2682-3p	9	16	16	0.5	0.36	1:hsa;hsa-mir-2682,60,81,-	0.497908	0.356945
hsa-miR-19b-1-5p	7	16	16	0.5	0.36	13:hsa;hsa-mir-19b-1,16,38,+	0.497908	0.356945
hsa-miR-184	6	16	16	0.5	0.36	15:hsa;hsa-mir-184,53,74,+	0.497908	0.356945
hsa-miR-5579-5p	6	16	16	0.5	0.36	11:hsa;hsa-mir-5579,1,21,-	0.497908	0.356945
hsa-miR-6507-5p	11	16	16	0.5	0.36	10:hsa;hsa-mir-6507,6,26,-	0.497908	0.356945
hsa-miR-1228-5p	7	16	16	0.5	0.36	12:hsa;hsa-mir-1228,1,21,+	0.497908	0.356945
hsa-miR-3614-5p	9	16	16	0.5	0.36	17:hsa;hsa-mir-3614,15,37,-	0.497908	0.356945
hsa-miR-1245b-3p	9	15	15	0.47	0.33	2:hsa;hsa-mir-1245b,42,63,-	0.466789	0.334636
hsa-miR-6505-5p	9	15	15	0.47	0.33	12:hsa;hsa-mir-6505,4,25,+	0.466789	0.334636
hsa-miR-4517	4	15	15	0.47	0.33	16:hsa;hsa-mir-4517,5,29,+	0.466789	0.334636
hsa-miR-2278	12	15	15	0.47	0.33	9:hsa;hsa-mir-2278,16,37,+	0.466789	0.334636
hsa-miR-129-1-3p	7	15	14	0.47	0.33	7:hsa;hsa-mir-129-1,49,70,+	0.43567	0.312327
hsa-miR-3653-3p	12	15	15	0.47	0.33	22:hsa;hsa-mir-3653,75,92,-	0.466789	0.334636
hsa-miR-618	13	15	15	0.47	0.33	12:hsa;hsa-mir-618,16,38,-	0.466789	0.334636
hsa-miR-3155a	5	14	14	0.44	0.31	10:hsa;hsa-mir-3155a,52,72,+	0.43567	0.312327
hsa-miR-197-5p	12	14	14	0.44	0.31	1:hsa;hsa-mir-197,9,31,+	0.43567	0.312327
hsa-miR-1276	8	14	14	0.44	0.31	15:hsa;hsa-mir-1276,12,31,-	0.43567	0.312327
hsa-miR-449a	8	14	14	0.44	0.31	5:hsa;hsa-mir-449a,16,37,-	0.43567	0.312327
hsa-miR-4762-3p	7	14	14	0.44	0.31	22:hsa;hsa-mir-4762,49,70,+	0.43567	0.312327
hsa-miR-381-5p	6	14	14	0.44	0.31	14:hsa;hsa-mir-381,8,29,+	0.43567	0.312327
hsa-miR-92a-1-5p	4	14	14	0.44	0.31	13:hsa;hsa-mir-92a-1,11,33,+	0.43567	0.312327
hsa-miR-6882-5p	9	14	14	0.44	0.31	15:hsa;hsa-mir-6882,6,27,-	0.43567	0.312327
hsv1-miR-H5-5p	12	14	7	0.44	0.31	JQ673480:hsv1;hsv1-mir-H5,11,32,-	0.217835	0.156163
hsa-miR-4664-3p	12	14	14	0.44	0.31	8:hsa;hsa-mir-4664,44,65,-	0.43567	0.312327
hsa-miR-3619-5p	9	14	14	0.44	0.31	22:hsa;hsa-mir-3619,16,37,+	0.43567	0.312327
hsv1-miR-H5-5p	12	14	7	0.44	0.31	JQ673480:hsv1;hsv1-mir-H5,11,32,+	0.217835	0.156163
hsa-miR-6842-3p	5	13	13	0.4	0.29	8:hsa;hsa-mir-6842,44,65,+	0.40455	0.290018
hsa-miR-503-3p	11	13	13	0.4	0.29	X:hsa;hsa-mir-503,46,68,-	0.40455	0.290018
hsa-miR-548ao-3p	6	13	13	0.4	0.29	8:hsa;hsa-mir-548ao,58,79,-	0.40455	0.290018
hsv1-miR-H17a	9	13	3.25	0.4	0.29	JQ673480:hsv1;hsv1-mir-H17a,63,83,+	0.101138	0.0725044
hsv1-miR-H17	9	13	3.25	0.4	0.29	JQ673480:hsv1;hsv1-mir-H17a,63,83,+	0.101138	0.0725044
hsa-miR-627-5p	6	13	13	0.4	0.29	15:hsa;hsa-mir-627,16,37,-	0.40455	0.290018
hsv1-miR-H17a	9	13	3.25	0.4	0.29	JQ673480:hsv1;hsv1-mir-H17a,63,83,-	0.101138	0.0725044
hsv1-miR-H17	9	13	3.25	0.4	0.29	JQ673480:hsv1;hsv1-mir-H17a,63,83,-	0.101138	0.0725044
hsa-miR-3184-5p	7	13	13	0.4	0.29	17:hsa;hsa-mir-3184,10,33,-	0.40455	0.290018
hsa-miR-643	9	13	13	0.4	0.29	19:hsa;hsa-mir-643,61,82,+	0.40455	0.290018
hsa-miR-376a-2-5p	7	13	13	0.4	0.29	14:hsa;hsa-mir-376a-2,12,32,+	0.40455	0.290018
hsv1-miR-H5-3p	12	13	6.5	0.4	0.29	JQ673480:hsv1;hsv1-mir-H5,53,74,-	0.202275	0.145009
hsa-miR-939-5p	8	13	13	0.4	0.29	8:hsa;hsa-mir-939,15,38,-	0.40455	0.290018
hsv1-miR-H5-3p	12	13	6.5	0.4	0.29	JQ673480:hsv1;hsv1-mir-H5,53,74,+	0.202275	0.145009
hsa-miR-6516-3p	10	12	12	0.37	0.27	17:hsa;hsa-mir-6516,53,74,+	0.373431	0.267709
hsa-miR-6827-5p	9	12	12	0.37	0.27	3:hsa;hsa-mir-6827,6,27,-	0.373431	0.267709
hsa-miR-561-3p	3	12	12	0.37	0.27	2:hsa;hsa-mir-561,61,82,+	0.373431	0.267709
hsv1-miR-H15	3	12	6	0.37	0.27	JQ673480:hsv1;hsv1-mir-H15,62,83,+	0.186716	0.133854
hsv1-miR-H15	3	12	6	0.37	0.27	JQ673480:hsv1;hsv1-mir-H15,62,83,-	0.186716	0.133854
hsa-miR-3165	4	12	12	0.37	0.27	11:hsa;hsa-mir-3165,10,31,-	0.373431	0.267709
hsa-miR-516a-5p	3	12	6	0.37	0.27	19:hsa;hsa-mir-516a-2,16,38,+	0.186716	0.133854
hsa-miR-3152-5p	6	12	12	0.37	0.27	9:hsa;hsa-mir-3152,11,32,+	0.373431	0.267709
hsa-miR-133a-3p	6	12	6	0.37	0.27	20:hsa;hsa-mir-133a-2,59,80,+	0.186716	0.133854
hsa-miR-133a-3p	6	12	6	0.37	0.27	18:hsa;hsa-mir-133a-1,53,74,-	0.186716	0.133854
hsa-miR-4794	4	12	12	0.37	0.27	1:hsa;hsa-mir-4794,9,30,+	0.373431	0.267709
hsa-miR-10b-3p	7	12	12	0.37	0.27	2:hsa;hsa-mir-10b,66,87,+	0.373431	0.267709
hsa-miR-1538	7	12	12	0.37	0.27	16:hsa;hsa-mir-1538,39,61,-	0.373431	0.267709
hsa-miR-320d	6	12	2.77	0.37	0.27	X:hsa;hsa-mir-320d-2,30,48,-	0.0861337	0.0617483
hsa-miR-4455	1	12	12	0.37	0.27	4:hsa;hsa-mir-4455,4,20,-	0.373431	0.267709
hsa-miR-488-5p	7	12	12	0.37	0.27	1:hsa;hsa-mir-488,14,34,-	0.373431	0.267709
hsa-miR-3157-5p	11	12	12	0.37	0.27	10:hsa;hsa-mir-3157,10,31,-	0.373431	0.267709
hsa-miR-1247-5p	12	12	12	0.37	0.27	14:hsa;hsa-mir-1247,40,61,-	0.373431	0.267709
hsa-miR-320d	6	12	2.77	0.37	0.27	13:hsa;hsa-mir-320d-1,30,48,-	0.0861337	0.0617483
hsa-miR-516a-5p	3	12	6	0.37	0.27	19:hsa;hsa-mir-516a-1,16,38,+	0.186716	0.133854
hsa-miR-556-3p	4	12	12	0.37	0.27	1:hsa;hsa-mir-556,55,76,+	0.373431	0.267709
hsa-miR-4755-5p	4	12	12	0.37	0.27	20:hsa;hsa-mir-4755,10,31,+	0.373431	0.267709
hsa-miR-6514-5p	8	11	11	0.34	0.25	11:hsa;hsa-mir-6514,1,23,-	0.342312	0.2454
hsa-miR-6516-5p	9	11	11	0.34	0.25	17:hsa;hsa-mir-6516,12,33,+	0.342312	0.2454
hsa-miR-588	7	11	11	0.34	0.25	6:hsa;hsa-mir-588,16,36,+	0.342312	0.2454
hsa-miR-4707-3p	8	11	11	0.34	0.25	14:hsa;hsa-mir-4707,52,73,-	0.342312	0.2454
hsa-miR-101-5p	7	11	11	0.34	0.25	1:hsa;hsa-mir-101-1,11,32,-	0.342312	0.2454
hsa-miR-5002-5p	8	11	11	0.34	0.25	3:hsa;hsa-mir-5002,21,44,+	0.342312	0.2454
hsa-miR-3157-3p	6	11	11	0.34	0.25	10:hsa;hsa-mir-3157,58,79,-	0.342312	0.2454
hsa-miR-323a-5p	8	11	11	0.34	0.25	14:hsa;hsa-mir-323a,16,37,+	0.342312	0.2454
hsa-miR-4731-5p	6	11	11	0.34	0.25	17:hsa;hsa-mir-4731,10,31,-	0.342312	0.2454
hsa-miR-642a-3p	6	11	11	0.34	0.25	19:hsa;hsa-mir-642a,51,72,+	0.342312	0.2454
hsa-miR-6877-5p	8	11	11	0.34	0.25	9:hsa;hsa-mir-6877,6,27,+	0.342312	0.2454
hsa-miR-6837-3p	7	11	11	0.34	0.25	7:hsa;hsa-mir-6837,42,64,+	0.342312	0.2454
hsa-miR-135b-5p	5	11	11	0.34	0.25	1:hsa;hsa-mir-135b,16,38,-	0.342312	0.2454
hsa-miR-6770-3p	6	10	1.11	0.31	0.22	16:hsa;hsa-mir-6770-2,40,60,+	0.034577	0.0247878
hsa-miR-6770-3p	6	10	1.11	0.31	0.22	16:hsa;hsa-mir-6770-1,40,60,-	0.034577	0.0247878
hsa-miR-6770-3p	6	10	1.11	0.31	0.22	16:hsa;hsa-mir-6770-3,40,60,+	0.034577	0.0247878
hsa-miR-1226-5p	9	10	10	0.31	0.22	3:hsa;hsa-mir-1226,1,26,+	0.311193	0.22309
hsa-miR-491-3p	6	10	10	0.31	0.22	9:hsa;hsa-mir-491,50,71,+	0.311193	0.22309
hsa-miR-5094	9	10	10	0.31	0.22	15:hsa;hsa-mir-5094,11,32,-	0.311193	0.22309
hsa-miR-302a-5p	7	10	10	0.31	0.22	4:hsa;hsa-mir-302a,6,28,-	0.311193	0.22309
hsa-miR-6770-3p	6	10	1.11	0.31	0.22	16:hsa;hsa-mir-6770-3,40,60,-	0.034577	0.0247878
hsa-miR-597-5p	6	10	10	0.31	0.22	8:hsa;hsa-mir-597,16,37,+	0.311193	0.22309
hsa-miR-6770-3p	6	10	1.11	0.31	0.22	16:hsa;hsa-mir-6770-1,40,60,+	0.034577	0.0247878
hsa-miR-494-5p	7	10	10	0.31	0.22	14:hsa;hsa-mir-494,15,37,+	0.311193	0.22309
hsa-miR-150-5p	4	10	10	0.31	0.22	19:hsa;hsa-mir-150,16,37,-	0.311193	0.22309
hsa-miR-3677-3p	7	10	10	0.31	0.22	16:hsa;hsa-mir-3677,39,60,+	0.311193	0.22309
hsa-miR-3064-5p	5	10	10	0.31	0.22	17:hsa;hsa-mir-3064,3,23,-	0.311193	0.22309
hsa-miR-6770-3p	6	10	1.11	0.31	0.22	16:hsa;hsa-mir-6770-3,40,60,+	0.034577	0.0247878
hsa-miR-4527	5	10	10	0.31	0.22	18:hsa;hsa-mir-4527,8,29,+	0.311193	0.22309
hsa-miR-433-5p	5	10	10	0.31	0.22	14:hsa;hsa-mir-433,12,33,+	0.311193	0.22309
hsa-miR-6770-3p	6	10	1.11	0.31	0.22	16:hsa;hsa-mir-6770-1,40,60,+	0.034577	0.0247878
hsa-miR-1179	4	10	10	0.31	0.22	15:hsa;hsa-mir-1179,15,35,+	0.311193	0.22309
hsa-miR-4676-5p	7	10	10	0.31	0.22	10:hsa;hsa-mir-4676,10,30,+	0.311193	0.22309
hsa-miR-4725-5p	6	10	10	0.31	0.22	17:hsa;hsa-mir-4725,13,33,+	0.311193	0.22309
hsa-miR-6770-3p	6	10	1.11	0.31	0.22	16:hsa;hsa-mir-6770-2,40,60,-	0.034577	0.0247878
hsa-miR-6770-3p	6	10	1.11	0.31	0.22	16:hsa;hsa-mir-6770-2,40,60,+	0.034577	0.0247878
hsa-miR-6815-5p	9	10	10	0.31	0.22	21:hsa;hsa-mir-6815,6,28,+	0.311193	0.22309
hsa-miR-1245b-5p	9	9	9	0.28	0.2	2:hsa;hsa-mir-1245b,9,29,-	0.280073	0.200781
hsa-miR-3942-5p	4	9	9	0.28	0.2	15:hsa;hsa-mir-3942,23,44,-	0.280073	0.200781
hsa-miR-3065-3p	7	9	9	0.28	0.2	17:hsa;hsa-mir-3065,50,72,+	0.280073	0.200781
hsa-miR-624-3p	6	9	9	0.28	0.2	14:hsa;hsa-mir-624,54,74,-	0.280073	0.200781
hsa-miR-218-1-3p	9	9	9	0.28	0.2	4:hsa;hsa-mir-218-1,68,89,+	0.280073	0.200781
hsa-miR-4536-5p	5	9	4.5	0.28	0.2	X:hsa;hsa-mir-4536-1,2,22,-	0.140037	0.100391
hsa-miR-3131	6	9	9	0.28	0.2	2:hsa;hsa-mir-3131,4,26,-	0.280073	0.200781
hsa-miR-451a	4	9	9	0.28	0.2	17:hsa;hsa-mir-451a,17,38,-	0.280073	0.200781
hsa-miR-4536-5p	5	9	4.5	0.28	0.2	X:hsa;hsa-mir-4536-2,2,22,+	0.140037	0.100391
hsa-miR-6854-5p	5	9	9	0.28	0.2	9:hsa;hsa-mir-6854,6,29,-	0.280073	0.200781
hsa-miR-5587-5p	3	9	9	0.28	0.2	16:hsa;hsa-mir-5587,1,18,+	0.280073	0.200781
hsa-miR-1287-3p	7	9	9	0.28	0.2	10:hsa;hsa-mir-1287,55,76,-	0.280073	0.200781
hsa-miR-26a-1-3p	5	9	9	0.28	0.2	3:hsa;hsa-mir-26a-1,49,70,+	0.280073	0.200781
hsa-miR-3150a-5p	6	9	9	0.28	0.2	8:hsa;hsa-mir-3150a,12,33,+	0.280073	0.200781
hsa-miR-1234-3p	4	9	9	0.28	0.2	8:hsa;hsa-mir-1234,57,78,-	0.280073	0.200781
hsa-miR-943	5	9	9	0.28	0.2	4:hsa;hsa-mir-943,55,75,-	0.280073	0.200781
hsa-miR-181b-2-3p	7	9	8.5	0.28	0.2	9:hsa;hsa-mir-181b-2,54,73,+	0.264514	0.189627
hsa-miR-4761-3p	5	9	9	0.28	0.2	22:hsa;hsa-mir-4761,62,82,+	0.280073	0.200781
hsa-miR-6753-3p	7	9	9	0.28	0.2	11:hsa;hsa-mir-6753,139,160,+	0.280073	0.200781
hsa-miR-1255a	9	9	9	0.28	0.2	4:hsa;hsa-mir-1255a,28,50,-	0.280073	0.200781
hsa-miR-3192-5p	7	9	9	0.28	0.2	20:hsa;hsa-mir-3192,10,32,+	0.280073	0.200781
hsa-miR-4803	7	9	9	0.28	0.2	5:hsa;hsa-mir-4803,10,30,+	0.280073	0.200781
hsa-miR-1288-3p	5	9	9	0.28	0.2	17:hsa;hsa-mir-1288,45,65,+	0.280073	0.200781
hsa-miR-3173-3p	9	9	9	0.28	0.2	14:hsa;hsa-mir-3173,43,64,-	0.280073	0.200781
hsa-miR-1537-5p	2	9	9	0.28	0.2	1:hsa;hsa-mir-1537,3,24,-	0.280073	0.200781
hsa-miR-3126-5p	4	9	9	0.28	0.2	2:hsa;hsa-mir-3126,10,31,+	0.280073	0.200781
hsa-miR-4750-5p	6	9	9	0.28	0.2	19:hsa;hsa-mir-4750,3,24,+	0.280073	0.200781
hsa-miR-3175	6	9	9	0.28	0.2	15:hsa;hsa-mir-3175,10,31,+	0.280073	0.200781
hsa-miR-4479	9	9	9	0.28	0.2	9:hsa;hsa-mir-4479,45,66,+	0.280073	0.200781
hsa-miR-874-5p	3	9	9	0.28	0.2	5:hsa;hsa-mir-874,10,32,-	0.280073	0.200781
hsa-miR-552-3p	4	8	8	0.25	0.18	1:hsa;hsa-mir-552,61,81,-	0.248954	0.178472
hsa-miR-6838-5p	6	8	8	0.25	0.18	7:hsa;hsa-mir-6838,6,27,-	0.248954	0.178472
hsa-miR-410-5p	7	8	8	0.25	0.18	14:hsa;hsa-mir-410,14,34,+	0.248954	0.178472
hsa-miR-300	8	8	6	0.25	0.18	14:hsa;hsa-mir-300,52,73,+	0.186716	0.133854
hsa-miR-3199	7	8	4	0.25	0.18	22:hsa;hsa-mir-3199-1,10,32,-	0.124477	0.0892362
hsa-miR-3681-5p	7	8	8	0.25	0.18	2:hsa;hsa-mir-3681,9,30,+	0.248954	0.178472
hsa-miR-4638-5p	5	8	8	0.25	0.18	5:hsa;hsa-mir-4638,2,22,-	0.248954	0.178472
hsa-miR-676-3p	6	8	8	0.25	0.18	X:hsa;hsa-mir-676,43,63,+	0.248954	0.178472
hsa-miR-6881-3p	7	8	8	0.25	0.18	15:hsa;hsa-mir-6881,51,72,-	0.248954	0.178472
hsa-miR-141-3p	7	8	8	0.25	0.18	12:hsa;hsa-mir-141,59,80,+	0.248954	0.178472
hsa-miR-432-3p	6	8	8	0.25	0.18	14:hsa;hsa-mir-432,62,82,+	0.248954	0.178472
hsa-miR-7845-5p	5	8	8	0.25	0.18	2:hsa;hsa-mir-7845,3,23,+	0.248954	0.178472
hsa-miR-6715a-3p	4	8	8	0.25	0.18	10:hsa;hsa-mir-6715a,49,69,+	0.248954	0.178472
hsa-miR-935	5	8	8	0.25	0.18	19:hsa;hsa-mir-935,56,78,+	0.248954	0.178472
hsa-miR-4799-5p	5	8	8	0.25	0.18	4:hsa;hsa-mir-4799,10,31,+	0.248954	0.178472
hsa-miR-511-3p	4	8	8	0.25	0.18	10:hsa;hsa-mir-511,54,73,+	0.248954	0.178472
hsa-miR-6852-3p	7	8	8	0.25	0.18	9:hsa;hsa-mir-6852,42,58,-	0.248954	0.178472
hsa-miR-610	6	8	8	0.25	0.18	11:hsa;hsa-mir-610,16,36,+	0.248954	0.178472
hsa-miR-3124-5p	5	8	8	0.25	0.18	1:hsa;hsa-mir-3124,7,27,+	0.248954	0.178472
hsa-miR-495-5p	4	8	8	0.25	0.18	14:hsa;hsa-mir-495,14,35,+	0.248954	0.178472
hsa-miR-3199	7	8	4	0.25	0.18	22:hsa;hsa-mir-3199-2,10,32,+	0.124477	0.0892362
hsa-miR-6770-5p	4	7	0.78	0.22	0.16	16:hsa;hsa-mir-6770-2,6,29,+	0.0242039	0.0173515
hsa-miR-6726-3p	7	7	7	0.22	0.16	1:hsa;hsa-mir-6726,42,61,-	0.217835	0.156163
hsa-miR-3145-5p	3	7	7	0.22	0.16	6:hsa;hsa-mir-3145,12,33,-	0.217835	0.156163
hsa-miR-6770-5p	4	7	0.78	0.22	0.16	16:hsa;hsa-mir-6770-1,6,29,-	0.0242039	0.0173515
hsa-miR-6770-5p	4	7	0.78	0.22	0.16	16:hsa;hsa-mir-6770-3,6,29,+	0.0242039	0.0173515
hsa-miR-4440	7	7	7	0.22	0.16	2:hsa;hsa-mir-4440,65,86,-	0.217835	0.156163
hsa-miR-1343-5p	7	7	7	0.22	0.16	11:hsa;hsa-mir-1343,15,36,+	0.217835	0.156163
hsa-miR-6811-5p	5	7	7	0.22	0.16	2:hsa;hsa-mir-6811,2,23,+	0.217835	0.156163
hsa-miR-4743-5p	6	7	7	0.22	0.16	18:hsa;hsa-mir-4743,3,25,+	0.217835	0.156163
hsa-miR-1973	6	7	7	0.22	0.16	4:hsa;hsa-mir-1973,26,44,+	0.217835	0.156163
hsa-miR-655-5p	4	7	7	0.22	0.16	14:hsa;hsa-mir-655,23,44,+	0.217835	0.156163
hsa-miR-6770-5p	4	7	0.78	0.22	0.16	16:hsa;hsa-mir-6770-3,6,29,-	0.0242039	0.0173515
hsa-miR-3127-5p	6	7	7	0.22	0.16	2:hsa;hsa-mir-3127,11,33,+	0.217835	0.156163
hsa-miR-6770-5p	4	7	0.78	0.22	0.16	16:hsa;hsa-mir-6770-1,6,29,+	0.0242039	0.0173515
hsa-miR-5188	6	7	7	0.22	0.16	12:hsa;hsa-mir-5188,64,86,+	0.217835	0.156163
hsa-miR-5698	3	7	7	0.22	0.16	1:hsa;hsa-mir-5698,10,31,-	0.217835	0.156163
hsa-miR-6770-5p	4	7	0.78	0.22	0.16	16:hsa;hsa-mir-6770-3,6,29,+	0.0242039	0.0173515
hsa-miR-4660	4	7	7	0.22	0.16	8:hsa;hsa-mir-4660,9,31,+	0.217835	0.156163
hsa-miR-18b-5p	4	7	3.5	0.22	0.16	X:hsa;hsa-mir-18b,6,28,-	0.108917	0.0780817
hsa-miR-4642	5	7	7	0.22	0.16	6:hsa;hsa-mir-4642,10,31,+	0.217835	0.156163
hsa-miR-4804-5p	7	7	7	0.22	0.16	5:hsa;hsa-mir-4804,10,30,+	0.217835	0.156163
hsa-miR-139-3p	6	7	7	0.22	0.16	11:hsa;hsa-mir-139,43,65,-	0.217835	0.156163
hsa-miR-570-3p	4	7	7	0.22	0.16	3:hsa;hsa-mir-570,60,81,+	0.217835	0.156163
hsa-miR-6770-5p	4	7	0.78	0.22	0.16	16:hsa;hsa-mir-6770-1,6,29,+	0.0242039	0.0173515
hsa-miR-1537-3p	5	7	7	0.22	0.16	1:hsa;hsa-mir-1537,40,61,-	0.217835	0.156163
hsa-miR-6770-5p	4	7	0.78	0.22	0.16	16:hsa;hsa-mir-6770-2,6,29,-	0.0242039	0.0173515
hsv1-miR-H7-5p	6	7	3.5	0.22	0.16	JQ673480:hsv1;hsv1-mir-H7,14,34,+	0.108917	0.0780817
hsa-miR-4498	6	7	7	0.22	0.16	12:hsa;hsa-mir-4498,6,27,-	0.217835	0.156163
hsa-miR-6770-5p	4	7	0.78	0.22	0.16	16:hsa;hsa-mir-6770-2,6,29,+	0.0242039	0.0173515
hsv1-miR-H7-5p	6	7	3.5	0.22	0.16	JQ673480:hsv1;hsv1-mir-H7,14,34,-	0.108917	0.0780817
hsa-miR-4741	7	7	7	0.22	0.16	18:hsa;hsa-mir-4741,59,81,+	0.217835	0.156163
hsa-miR-3935	5	7	7	0.22	0.16	16:hsa;hsa-mir-3935,58,79,+	0.217835	0.156163
hsa-miR-653-5p	6	7	7	0.22	0.16	7:hsa;hsa-mir-653,13,33,-	0.217835	0.156163
hsa-miR-7705	6	7	7	0.22	0.16	8:hsa;hsa-mir-7705,1,23,-	0.217835	0.156163
hsa-miR-4786-5p	4	7	7	0.22	0.16	2:hsa;hsa-mir-4786,11,32,-	0.217835	0.156163
hsa-miR-934	6	6	6	0.19	0.13	X:hsa;hsa-mir-934,15,36,+	0.186716	0.133854
hsa-miR-4485-5p	4	6	6	0.19	0.13	11:hsa;hsa-mir-4485,7,22,-	0.186716	0.133854
hsa-miR-3140-3p	5	6	6	0.19	0.13	4:hsa;hsa-mir-3140,60,81,-	0.186716	0.133854
hsa-miR-3180-5p	4	6	0.67	0.19	0.13	16:hsa;hsa-mir-3180-3,18,42,-	0.0207462	0.0148727
hsa-miR-5090	5	6	6	0.19	0.13	7:hsa;hsa-mir-5090,11,33,+	0.186716	0.133854
hsa-miR-3180-5p	4	6	0.67	0.19	0.13	16:hsa;hsa-mir-3180-2,14,38,-	0.0207462	0.0148727
hsa-miR-6502-5p	3	6	6	0.19	0.13	12:hsa;hsa-mir-6502,10,31,+	0.186716	0.133854
hsa-miR-6757-5p	4	6	6	0.19	0.13	12:hsa;hsa-mir-6757,6,27,+	0.186716	0.133854
hsa-miR-3680-5p	5	6	1.5	0.19	0.13	16:hsa;hsa-mir-3680-2,14,35,-	0.0466789	0.0334636
hsa-miR-3613-5p	1	6	6	0.19	0.13	13:hsa;hsa-mir-3613,16,37,-	0.186716	0.133854
hsa-miR-4647	5	6	6	0.19	0.13	6:hsa;hsa-mir-4647,11,33,-	0.186716	0.133854
hsa-miR-6755-5p	5	6	6	0.19	0.13	11:hsa;hsa-mir-6755,6,27,+	0.186716	0.133854
hsa-miR-4699-3p	5	6	6	0.19	0.13	12:hsa;hsa-mir-4699,46,67,+	0.186716	0.133854
hsa-miR-3064-3p	6	6	6	0.19	0.13	17:hsa;hsa-mir-3064,43,65,-	0.186716	0.133854
hsa-miR-217	2	6	6	0.19	0.13	2:hsa;hsa-mir-217,35,57,-	0.186716	0.133854
hsa-miR-4497	4	6	6	0.19	0.13	12:hsa;hsa-mir-4497,3,19,+	0.186716	0.133854
hsa-miR-4425	5	6	6	0.19	0.13	1:hsa;hsa-mir-4425,50,71,+	0.186716	0.133854
hsa-miR-3180-5p	4	6	0.67	0.19	0.13	16:hsa;hsa-mir-3180-3,18,42,+	0.0207462	0.0148727
hsa-miR-3180-5p	4	6	0.67	0.19	0.13	16:hsa;hsa-mir-3180-1,18,42,-	0.0207462	0.0148727
hsa-miR-7854-3p	6	6	6	0.19	0.13	16:hsa;hsa-mir-7854,41,61,+	0.186716	0.133854
hsa-miR-5697	4	6	6	0.19	0.13	1:hsa;hsa-mir-5697,10,31,+	0.186716	0.133854
hsa-miR-4726-5p	1	6	6	0.19	0.13	17:hsa;hsa-mir-4726,1,23,+	0.186716	0.133854
hsa-miR-4687-3p	5	6	6	0.19	0.13	11:hsa;hsa-mir-4687,52,72,+	0.186716	0.133854
hsa-miR-4796-3p	4	6	6	0.19	0.13	3:hsa;hsa-mir-4796,53,74,-	0.186716	0.133854
hsa-miR-4742-3p	3	6	6	0.19	0.13	1:hsa;hsa-mir-4742,63,85,-	0.186716	0.133854
hsa-miR-656-5p	2	6	6	0.19	0.13	14:hsa;hsa-mir-656,8,28,+	0.186716	0.133854
hsa-miR-4662a-5p	3	6	6	0.19	0.13	8:hsa;hsa-mir-4662a,6,27,+	0.186716	0.133854
hsa-miR-3180-5p	4	6	0.67	0.19	0.13	16:hsa;hsa-mir-3180-1,18,42,+	0.0207462	0.0148727
hsa-miR-3180-5p	4	6	0.67	0.19	0.13	16:hsa;hsa-mir-3180-2,14,38,+	0.0207462	0.0148727
hsa-miR-3180-5p	4	6	0.67	0.19	0.13	16:hsa;hsa-mir-3180-3,18,42,+	0.0207462	0.0148727
hsa-miR-3680-5p	5	6	1.5	0.19	0.13	16:hsa;hsa-mir-3680-1,14,35,-	0.0466789	0.0334636
hsa-miR-3180-5p	4	6	0.67	0.19	0.13	16:hsa;hsa-mir-3180-2,14,38,+	0.0207462	0.0148727
hsa-miR-3680-5p	5	6	1.5	0.19	0.13	16:hsa;hsa-mir-3680-2,14,35,-	0.0466789	0.0334636
hsa-miR-3166	3	6	6	0.19	0.13	11:hsa;hsa-mir-3166,60,82,+	0.186716	0.133854
hsa-miR-4708-3p	5	6	6	0.19	0.13	14:hsa;hsa-mir-4708,40,61,-	0.186716	0.133854
hsa-miR-3680-5p	5	6	1.5	0.19	0.13	16:hsa;hsa-mir-3680-1,14,35,-	0.0466789	0.0334636
hsa-miR-3125	3	6	6	0.19	0.13	2:hsa;hsa-mir-3125,10,29,+	0.186716	0.133854
hsa-miR-5680	5	6	6	0.19	0.13	8:hsa;hsa-mir-5680,52,73,+	0.186716	0.133854
hsa-miR-3940-5p	3	6	6	0.19	0.13	19:hsa;hsa-mir-3940,23,42,-	0.186716	0.133854
hsa-miR-3180-5p	4	6	0.67	0.19	0.13	16:hsa;hsa-mir-3180-1,18,42,+	0.0207462	0.0148727
hsa-miR-3146	5	6	6	0.19	0.13	7:hsa;hsa-mir-3146,50,71,-	0.186716	0.133854
hsa-miR-302b-3p	2	6	6	0.19	0.13	4:hsa;hsa-mir-302b,47,69,-	0.186716	0.133854
hsa-miR-5004-3p	4	5	5	0.16	0.11	6:hsa;hsa-mir-5004,67,88,+	0.155596	0.111545
hsa-miR-2681-5p	5	5	5	0.16	0.11	13:hsa;hsa-mir-2681,22,43,-	0.155596	0.111545
hsa-miR-6847-5p	4	5	5	0.16	0.11	8:hsa;hsa-mir-6847,6,28,+	0.155596	0.111545
hsa-miR-6805-5p	5	5	5	0.16	0.11	19:hsa;hsa-mir-6805,6,27,+	0.155596	0.111545
hsa-miR-6780a-5p	4	5	5	0.16	0.11	17:hsa;hsa-mir-6780a,6,28,-	0.155596	0.111545
hsa-miR-2116-5p	5	5	5	0.16	0.11	15:hsa;hsa-mir-2116,14,34,-	0.155596	0.111545
hsa-miR-3943	4	5	5	0.16	0.11	7:hsa;hsa-mir-3943,23,45,+	0.155596	0.111545
hsa-miR-3151-5p	2	5	5	0.16	0.11	8:hsa;hsa-mir-3151,10,30,+	0.155596	0.111545
hsa-miR-10a-3p	2	5	5	0.16	0.11	17:hsa;hsa-mir-10a,63,84,-	0.155596	0.111545
hsa-miR-6782-3p	4	5	5	0.16	0.11	17:hsa;hsa-mir-6782,46,68,-	0.155596	0.111545
hsa-miR-6513-5p	2	5	5	0.16	0.11	2:hsa;hsa-mir-6513,3,25,-	0.155596	0.111545
hsa-miR-1304-5p	5	5	5	0.16	0.11	11:hsa;hsa-mir-1304,20,41,-	0.155596	0.111545
hsa-miR-6762-5p	4	5	5	0.16	0.11	12:hsa;hsa-mir-6762,6,28,+	0.155596	0.111545
hsa-miR-6772-3p	4	5	5	0.16	0.11	16:hsa;hsa-mir-6772,41,63,-	0.155596	0.111545
hsa-miR-3622a-3p	5	5	5	0.16	0.11	8:hsa;hsa-mir-3622a,50,71,+	0.155596	0.111545
hsa-miR-627-3p	4	5	5	0.16	0.11	15:hsa;hsa-mir-627,55,74,-	0.155596	0.111545
hsa-miR-1193	4	5	5	0.16	0.11	14:hsa;hsa-mir-1193,10,32,+	0.155596	0.111545
hsa-miR-6509-5p	4	5	5	0.16	0.11	7:hsa;hsa-mir-6509,15,35,-	0.155596	0.111545
hsa-miR-4679	5	5	3	0.16	0.11	10:hsa;hsa-mir-4679-1,9,30,+	0.0933578	0.0669271
hsa-miR-151b	2	5	2.5	0.16	0.11	14:hsa;hsa-mir-151b,60,77,-	0.0777982	0.0557726
hsa-miR-6826-5p	5	5	5	0.16	0.11	3:hsa;hsa-mir-6826,6,28,+	0.155596	0.111545
hsa-miR-1909-5p	5	5	5	0.16	0.11	19:hsa;hsa-mir-1909,16,36,-	0.155596	0.111545
hsa-miR-1909-3p	4	5	5	0.16	0.11	19:hsa;hsa-mir-1909,49,70,-	0.155596	0.111545
hsa-miR-5189-5p	4	5	5	0.16	0.11	16:hsa;hsa-mir-5189,26,49,+	0.155596	0.111545
hsa-miR-15a-3p	3	5	5	0.16	0.11	13:hsa;hsa-mir-15a,51,72,-	0.155596	0.111545
hsa-miR-3653-5p	4	5	5	0.16	0.11	22:hsa;hsa-mir-3653,23,42,-	0.155596	0.111545
hsa-miR-3911	5	5	5	0.16	0.11	9:hsa;hsa-mir-3911,12,33,-	0.155596	0.111545
hsa-miR-3121-3p	3	5	5	0.16	0.11	1:hsa;hsa-mir-3121,47,68,-	0.155596	0.111545
hsa-miR-5690	4	5	5	0.16	0.11	6:hsa;hsa-mir-5690,10,30,-	0.155596	0.111545
hsa-miR-6839-5p	5	5	5	0.16	0.11	7:hsa;hsa-mir-6839,6,27,+	0.155596	0.111545
hsa-miR-4705	4	5	5	0.16	0.11	13:hsa;hsa-mir-4705,10,31,-	0.155596	0.111545
hsa-miR-6818-5p	4	5	5	0.16	0.11	22:hsa;hsa-mir-6818,6,27,+	0.155596	0.111545
hsa-miR-6508-3p	2	5	5	0.16	0.11	21:hsa;hsa-mir-6508,37,58,+	0.155596	0.111545
hsa-miR-6797-3p	5	5	5	0.16	0.11	19:hsa;hsa-mir-6797,49,70,+	0.155596	0.111545
hsa-miR-6734-5p	5	5	5	0.16	0.11	1:hsa;hsa-mir-6734,6,28,-	0.155596	0.111545
hsa-miR-3189-3p	4	5	5	0.16	0.11	19:hsa;hsa-mir-3189,46,66,+	0.155596	0.111545
hsa-miR-3188	3	4	4	0.12	0.09	19:hsa;hsa-mir-3188,53,75,+	0.124477	0.0892362
hsa-miR-6511b-3p	4	4	2	0.12	0.09	16:hsa;hsa-mir-6511b-1,53,75,-	0.0622385	0.0446181
hsa-miR-514a-3p	3	4	0.8	0.12	0.09	X:hsa;hsa-mir-514a-3,54,74,-	0.0248954	0.0178472
hsa-miR-3143	4	4	4	0.12	0.09	6:hsa;hsa-mir-3143,4,28,+	0.124477	0.0892362
hsa-miR-6847-3p	3	4	4	0.12	0.09	8:hsa;hsa-mir-6847,45,66,+	0.124477	0.0892362
hsa-miR-514a-3p	3	4	0.8	0.12	0.09	X:hsa;hsa-mir-514a-3,54,74,-	0.0248954	0.0178472
hsa-miR-4706	4	4	4	0.12	0.09	14:hsa;hsa-mir-4706,10,34,+	0.124477	0.0892362
hsa-miR-3181	4	4	4	0.12	0.09	16:hsa;hsa-mir-3181,9,27,+	0.124477	0.0892362
hsa-miR-320e	3	4	3.12	0.12	0.09	19:hsa;hsa-mir-320e,35,52,-	0.0972477	0.0697158
hsa-miR-4792	3	4	4	0.12	0.09	3:hsa;hsa-mir-4792,7,24,-	0.124477	0.0892362
hsa-miR-4286	2	4	4	0.12	0.09	8:hsa;hsa-mir-4286,11,27,+	0.124477	0.0892362
hsa-miR-3675-5p	3	4	2	0.12	0.09	KI270714.1:hsa;hsa-mir-3675,12,34,+	0.0622385	0.0446181
hsa-miR-4284	4	4	4	0.12	0.09	7:hsa;hsa-mir-4284,11,28,+	0.124477	0.0892362
hsa-miR-1254	4	4	2	0.12	0.09	10:hsa;hsa-mir-1254-1,18,41,+	0.0622385	0.0446181
hsa-miR-5006-3p	2	4	4	0.12	0.09	13:hsa;hsa-mir-5006,70,90,-	0.124477	0.0892362
hsa-miR-514a-3p	3	4	0.8	0.12	0.09	X:hsa;hsa-mir-514a-2,54,74,-	0.0248954	0.0178472
hsa-miR-4782-5p	3	4	4	0.12	0.09	2:hsa;hsa-mir-4782,10,31,-	0.124477	0.0892362
hsa-miR-4734	3	4	4	0.12	0.09	17:hsa;hsa-mir-4734,41,62,-	0.124477	0.0892362
hsa-miR-3130-3p	4	4	2	0.12	0.09	2:hsa;hsa-mir-3130-1,44,64,-	0.0622385	0.0446181
hsa-miR-4679	4	4	2	0.12	0.09	10:hsa;hsa-mir-4679-2,10,31,-	0.0622385	0.0446181
hsa-miR-615-5p	2	4	4	0.12	0.09	12:hsa;hsa-mir-615,18,39,+	0.124477	0.0892362
hsa-miR-1286	3	4	4	0.12	0.09	22:hsa;hsa-mir-1286,47,67,-	0.124477	0.0892362
hsa-miR-6824-5p	3	4	4	0.12	0.09	3:hsa;hsa-mir-6824,6,27,-	0.124477	0.0892362
hsa-miR-598-5p	2	4	4	0.12	0.09	8:hsa;hsa-mir-598,24,46,-	0.124477	0.0892362
hsa-miR-514a-3p	3	4	0.8	0.12	0.09	X:hsa;hsa-mir-514a-2,54,74,-	0.0248954	0.0178472
hsa-miR-4797-5p	4	4	4	0.12	0.09	3:hsa;hsa-mir-4797,10,30,-	0.124477	0.0892362
hsa-miR-202-5p	3	4	4	0.12	0.09	10:hsa;hsa-mir-202,28,49,-	0.124477	0.0892362
hsa-miR-4804-3p	4	4	4	0.12	0.09	5:hsa;hsa-mir-4804,45,65,+	0.124477	0.0892362
hsa-miR-664b-5p	1	4	4	0.12	0.09	X:hsa;hsa-mir-664b,1,24,+	0.124477	0.0892362
hsa-miR-4744	4	4	4	0.12	0.09	18:hsa;hsa-mir-4744,10,32,-	0.124477	0.0892362
hsa-miR-4802-3p	3	4	4	0.12	0.09	4:hsa;hsa-mir-4802,47,69,-	0.124477	0.0892362
hsa-miR-7114-5p	4	4	4	0.12	0.09	9:hsa;hsa-mir-7114,6,26,-	0.124477	0.0892362
hsa-miR-3130-3p	4	4	2	0.12	0.09	2:hsa;hsa-mir-3130-2,44,64,+	0.0622385	0.0446181
hsa-miR-4767	4	4	4	0.12	0.09	X:hsa;hsa-mir-4767,10,32,+	0.124477	0.0892362
hsa-miR-500b-5p	4	4	2	0.12	0.09	X:hsa;hsa-mir-500b,11,28,+	0.0622385	0.0446181
hsa-miR-1254	4	4	2	0.12	0.09	10:hsa;hsa-mir-1254-2,4,27,+	0.0622385	0.0446181
hsa-miR-6741-5p	4	4	4	0.12	0.09	1:hsa;hsa-mir-6741,6,27,-	0.124477	0.0892362
hsa-miR-4738-3p	3	4	4	0.12	0.09	17:hsa;hsa-mir-4738,57,78,-	0.124477	0.0892362
hsa-miR-514a-3p	3	4	0.8	0.12	0.09	X:hsa;hsa-mir-514a-1,59,79,-	0.0248954	0.0178472
hsa-miR-5696	4	4	4	0.12	0.09	2:hsa;hsa-mir-5696,4,25,+	0.124477	0.0892362
hsa-miR-6819-5p	4	4	4	0.12	0.09	22:hsa;hsa-mir-6819,6,27,-	0.124477	0.0892362
hsa-miR-3675-5p	3	4	2	0.12	0.09	1:hsa;hsa-mir-3675,12,34,-	0.0622385	0.0446181
hsa-miR-612	4	4	4	0.12	0.09	11:hsa;hsa-mir-612,16,40,+	0.124477	0.0892362
hsa-miR-190a-3p	3	4	4	0.12	0.09	15:hsa;hsa-mir-190a,52,72,+	0.124477	0.0892362
hsa-miR-3941	4	4	4	0.12	0.09	10:hsa;hsa-mir-3941,60,81,+	0.124477	0.0892362
hsa-miR-182-3p	3	4	4	0.12	0.09	7:hsa;hsa-mir-182,67,87,-	0.124477	0.0892362
hsa-miR-6715b-3p	2	4	4	0.12	0.09	10:hsa;hsa-mir-6715b,46,67,-	0.124477	0.0892362
hsa-miR-6855-5p	3	4	4	0.12	0.09	9:hsa;hsa-mir-6855,6,30,+	0.124477	0.0892362
hsa-miR-3919	3	4	4	0.12	0.09	3:hsa;hsa-mir-3919,55,75,+	0.124477	0.0892362
hsa-miR-6511b-3p	4	4	2	0.12	0.09	16:hsa;hsa-mir-6511b-1,53,75,-	0.0622385	0.0446181
hsa-miR-192-3p	3	3	3	0.09	0.07	11:hsa;hsa-mir-192,67,88,-	0.0933578	0.0669271
hsa-miR-3120-3p	3	3	3	0.09	0.07	1:hsa;hsa-mir-3120,51,71,+	0.0933578	0.0669271
hsa-miR-2681-3p	2	3	3	0.09	0.07	13:hsa;hsa-mir-2681,61,82,-	0.0933578	0.0669271
hsa-miR-4659b-3p	3	3	2.5	0.09	0.07	8:hsa;hsa-mir-4659b,45,66,-	0.0777982	0.0557726
hsa-miR-512-3p	3	3	0.75	0.09	0.07	19:hsa;hsa-mir-512-2,57,78,+	0.0233395	0.0167318
hsa-miR-520a-3p	2	3	3	0.09	0.07	19:hsa;hsa-mir-520a,53,74,+	0.0933578	0.0669271
hsa-miR-3934-5p	3	3	3	0.09	0.07	6:hsa;hsa-mir-3934,25,46,+	0.0933578	0.0669271
hsa-miR-4748	3	3	3	0.09	0.07	19:hsa;hsa-mir-4748,10,30,+	0.0933578	0.0669271
hsa-miR-1292-3p	3	3	3	0.09	0.07	20:hsa;hsa-mir-1292,43,62,+	0.0933578	0.0669271
hsa-miR-3122	3	3	3	0.09	0.07	1:hsa;hsa-mir-3122,10,31,+	0.0933578	0.0669271
hsa-miR-186-3p	3	3	3	0.09	0.07	1:hsa;hsa-mir-186,54,75,-	0.0933578	0.0669271
hsa-miR-4764-5p	3	3	3	0.09	0.07	22:hsa;hsa-mir-4764,10,30,-	0.0933578	0.0669271
hsa-miR-3142	3	3	0.75	0.09	0.07	5:hsa;hsa-mir-3142,7,28,+	0.0233395	0.0167318
hsa-miR-3142	3	3	0.75	0.09	0.07	5:hsa;hsa-mir-3142,49,70,+	0.0233395	0.0167318
hsa-miR-3134	3	3	3	0.09	0.07	3:hsa;hsa-mir-3134,45,67,-	0.0933578	0.0669271
hsa-miR-3918	2	3	3	0.09	0.07	6:hsa;hsa-mir-3918,19,39,-	0.0933578	0.0669271
hsa-miR-124-5p	3	3	1	0.09	0.07	8:hsa;hsa-mir-124-1,14,35,-	0.0311193	0.022309
hsa-miR-1914-3p	1	3	3	0.09	0.07	20:hsa;hsa-mir-1914,50,71,-	0.0933578	0.0669271
hsa-miR-6806-3p	2	3	3	0.09	0.07	19:hsa;hsa-mir-6806,43,64,+	0.0933578	0.0669271
hsa-miR-3691-3p	3	3	3	0.09	0.07	6:hsa;hsa-mir-3691,56,77,-	0.0933578	0.0669271
hsa-miR-5587-3p	2	3	3	0.09	0.07	16:hsa;hsa-mir-5587,33,53,+	0.0933578	0.0669271
hsa-miR-1915-5p	3	3	3	0.09	0.07	10:hsa;hsa-mir-1915,12,33,-	0.0933578	0.0669271
hsa-miR-3680-3p	2	3	0.75	0.09	0.07	16:hsa;hsa-mir-3680-2,50,72,-	0.0233395	0.0167318
hsa-miR-512-3p	3	3	0.75	0.09	0.07	19:hsa;hsa-mir-512-1,51,72,+	0.0233395	0.0167318
hsa-miR-6861-3p	3	3	3	0.09	0.07	12:hsa;hsa-mir-6861,40,57,-	0.0933578	0.0669271
hsa-miR-4638-3p	3	3	3	0.09	0.07	5:hsa;hsa-mir-4638,35,57,-	0.0933578	0.0669271
hsa-miR-548a-3p	2	3	1	0.09	0.07	6:hsa;hsa-mir-548a-1,61,82,+	0.0311193	0.022309
hsa-miR-4699-5p	3	3	3	0.09	0.07	12:hsa;hsa-mir-4699,10,31,+	0.0933578	0.0669271
hsa-miR-3193	2	3	3	0.09	0.07	20:hsa;hsa-mir-3193,1,22,+	0.0933578	0.0669271
hsa-miR-7109-5p	3	3	3	0.09	0.07	22:hsa;hsa-mir-7109,6,26,-	0.0933578	0.0669271
hsa-miR-1298-3p	3	3	3	0.09	0.07	X:hsa;hsa-mir-1298,72,92,+	0.0933578	0.0669271
hsa-miR-6793-5p	3	3	3	0.09	0.07	19:hsa;hsa-mir-6793,6,27,+	0.0933578	0.0669271
hsa-miR-6801-3p	2	3	3	0.09	0.07	19:hsa;hsa-mir-6801,55,74,+	0.0933578	0.0669271
hsa-miR-3152-3p	2	3	3	0.09	0.07	9:hsa;hsa-mir-3152,45,66,+	0.0933578	0.0669271
hsa-miR-3682-3p	3	3	3	0.09	0.07	2:hsa;hsa-mir-3682,50,70,-	0.0933578	0.0669271
hsa-miR-3191-3p	3	3	3	0.09	0.07	19:hsa;hsa-mir-3191,46,68,-	0.0933578	0.0669271
hsa-miR-4773	3	3	1.5	0.09	0.07	2:hsa;hsa-mir-4773-1,48,69,+	0.0466789	0.0334636
hsa-miR-6736-5p	3	3	3	0.09	0.07	1:hsa;hsa-mir-6736,6,26,-	0.0933578	0.0669271
hsa-miR-378e	3	3	3	0.09	0.07	5:hsa;hsa-mir-378e,58,76,+	0.0933578	0.0669271
hsa-miR-548a-3p	2	3	1	0.09	0.07	8:hsa;hsa-mir-548a-3,61,82,-	0.0311193	0.022309
hsa-miR-3617-5p	3	3	3	0.09	0.07	20:hsa;hsa-mir-3617,10,31,-	0.0933578	0.0669271
hsa-miR-7156-5p	1	3	3	0.09	0.07	1:hsa;hsa-mir-7156,1,23,+	0.0933578	0.0669271
hsa-miR-4720-5p	2	3	3	0.09	0.07	16:hsa;hsa-mir-4720,4,25,+	0.0933578	0.0669271
hsa-miR-6869-5p	3	3	3	0.09	0.07	20:hsa;hsa-mir-6869,1,22,-	0.0933578	0.0669271
hsa-miR-512-3p	3	3	0.75	0.09	0.07	19:hsa;hsa-mir-512-2,57,78,+	0.0233395	0.0167318
hsa-miR-124-5p	3	3	1	0.09	0.07	20:hsa;hsa-mir-124-3,15,36,+	0.0311193	0.022309
hsa-miR-548a-3p	2	3	1	0.09	0.07	6:hsa;hsa-mir-548a-2,61,82,+	0.0311193	0.022309
hsa-miR-6810-3p	2	3	3	0.09	0.07	2:hsa;hsa-mir-6810,48,70,+	0.0933578	0.0669271
hsa-miR-7155-3p	2	3	3	0.09	0.07	11:hsa;hsa-mir-7155,38,56,-	0.0933578	0.0669271
hsa-miR-124-5p	3	3	1	0.09	0.07	8:hsa;hsa-mir-124-2,25,46,+	0.0311193	0.022309
hsa-miR-636	3	3	3	0.09	0.07	17:hsa;hsa-mir-636,61,83,-	0.0933578	0.0669271
hsa-miR-1246	3	3	3	0.09	0.07	2:hsa;hsa-mir-1246,11,29,-	0.0933578	0.0669271
hsa-miR-4672	3	3	3	0.09	0.07	9:hsa;hsa-mir-4672,51,71,-	0.0933578	0.0669271
hsa-miR-6721-5p	3	3	3	0.09	0.07	6:hsa;hsa-mir-6721,11,33,-	0.0933578	0.0669271
hsa-miR-1243	3	3	3	0.09	0.07	4:hsa;hsa-mir-1243,5,26,+	0.0933578	0.0669271
hsa-miR-3142	3	3	0.75	0.09	0.07	5:hsa;hsa-mir-3142,7,28,+	0.0233395	0.0167318
hsa-miR-3142	3	3	0.75	0.09	0.07	5:hsa;hsa-mir-3142,49,70,+	0.0233395	0.0167318
hsa-miR-4768-5p	3	3	3	0.09	0.07	X:hsa;hsa-mir-4768,9,30,+	0.0933578	0.0669271
hsa-miR-3680-3p	2	3	0.75	0.09	0.07	16:hsa;hsa-mir-3680-1,50,72,-	0.0233395	0.0167318
hsa-miR-512-3p	3	3	0.75	0.09	0.07	19:hsa;hsa-mir-512-1,51,72,+	0.0233395	0.0167318
hsa-miR-5579-3p	3	3	3	0.09	0.07	11:hsa;hsa-mir-5579,37,58,-	0.0933578	0.0669271
hsa-miR-3657	2	3	3	0.09	0.07	12:hsa;hsa-mir-3657,69,89,-	0.0933578	0.0669271
hsa-miR-6087	3	3	3	0.09	0.07	X:hsa;hsa-mir-6087,3,20,+	0.0933578	0.0669271
hsa-miR-5189-3p	3	3	3	0.09	0.07	16:hsa;hsa-mir-5189,67,87,+	0.0933578	0.0669271
hsa-miR-301b-5p	3	3	3	0.09	0.07	22:hsa;hsa-mir-301b,10,31,+	0.0933578	0.0669271
hsa-miR-3939	2	3	3	0.09	0.07	6:hsa;hsa-mir-3939,62,83,-	0.0933578	0.0669271
hsa-miR-6787-3p	3	3	3	0.09	0.07	17:hsa;hsa-mir-6787,40,61,+	0.0933578	0.0669271
hsa-miR-4773	3	3	1.5	0.09	0.07	2:hsa;hsa-mir-4773-2,48,69,-	0.0466789	0.0334636
hsa-miR-1283	3	3	1.5	0.09	0.07	19:hsa;hsa-mir-1283-2,14,35,+	0.0466789	0.0334636
hsa-miR-499b-3p	3	3	3	0.09	0.07	20:hsa;hsa-mir-499b,46,67,-	0.0933578	0.0669271
hsa-miR-3680-3p	2	3	0.75	0.09	0.07	16:hsa;hsa-mir-3680-2,50,72,-	0.0233395	0.0167318
hsa-miR-4723-5p	2	3	3	0.09	0.07	17:hsa;hsa-mir-4723,7,30,+	0.0933578	0.0669271
hsa-miR-374c-3p	3	3	2.5	0.09	0.07	X:hsa;hsa-mir-374c,39,60,+	0.0777982	0.0557726
hsa-miR-3679-5p	2	3	3	0.09	0.07	2:hsa;hsa-mir-3679,6,28,+	0.0933578	0.0669271
hsa-miR-3680-3p	2	3	0.75	0.09	0.07	16:hsa;hsa-mir-3680-1,50,72,-	0.0233395	0.0167318
hsa-miR-4637	3	3	3	0.09	0.07	5:hsa;hsa-mir-4637,60,81,-	0.0933578	0.0669271
hsa-miR-586	3	3	3	0.09	0.07	6:hsa;hsa-mir-586,16,37,-	0.0933578	0.0669271
hsa-miR-6777-5p	3	3	3	0.09	0.07	17:hsa;hsa-mir-6777,6,28,-	0.0933578	0.0669271
hsa-miR-6764-5p	3	3	3	0.09	0.07	14:hsa;hsa-mir-6764,6,27,+	0.0933578	0.0669271
hsa-miR-3183	3	3	3	0.09	0.07	17:hsa;hsa-mir-3183,10,31,-	0.0933578	0.0669271
hsa-miR-3944-5p	1	3	3	0.09	0.07	10:hsa;hsa-mir-3944,23,43,-	0.0933578	0.0669271
hsa-miR-3619-3p	2	3	3	0.09	0.07	22:hsa;hsa-mir-3619,47,68,+	0.0933578	0.0669271
hsa-miR-1283	3	3	1.5	0.09	0.07	19:hsa;hsa-mir-1283-1,14,35,+	0.0466789	0.0334636
hsa-miR-4510	3	3	1.5	0.09	0.07	15:hsa;hsa-mir-4510,8,29,+	0.0466789	0.0334636
hsa-miR-4489	3	3	3	0.09	0.07	11:hsa;hsa-mir-4489,6,26,+	0.0933578	0.0669271
hsa-miR-585-5p	3	3	3	0.09	0.07	5:hsa;hsa-mir-585,25,46,-	0.0933578	0.0669271
hsa-miR-4649-5p	3	3	3	0.09	0.07	7:hsa;hsa-mir-4649,3,26,+	0.0933578	0.0669271
hsa-miR-1266-5p	3	3	3	0.09	0.07	15:hsa;hsa-mir-1266,13,35,-	0.0933578	0.0669271
hsa-miR-548av-3p	3	3	1.67	0.09	0.07	11:hsa;hsa-mir-548l,53,72,-	0.0518654	0.0371817
hsa-miR-6746-5p	3	3	3	0.09	0.07	11:hsa;hsa-mir-6746,6,27,-	0.0933578	0.0669271
hsa-miR-6746-3p	3	3	3	0.09	0.07	11:hsa;hsa-mir-6746,42,63,-	0.0933578	0.0669271
hsa-miR-4755-3p	3	3	3	0.09	0.07	20:hsa;hsa-mir-4755,44,65,+	0.0933578	0.0669271
hsa-miR-5695	3	3	3	0.09	0.07	19:hsa;hsa-mir-5695,54,75,+	0.0933578	0.0669271
hsa-miR-4695-3p	2	2	2	0.06	0.04	1:hsa;hsa-mir-4695,51,72,-	0.0622385	0.0446181
hsa-miR-6132	1	2	2	0.06	0.04	7:hsa;hsa-mir-6132,21,39,+	0.0622385	0.0446181
hsa-miR-3910	2	2	1	0.06	0.04	9:hsa;hsa-mir-3910-2,50,69,-	0.0311193	0.022309
hsa-miR-200b-5p	2	2	2	0.06	0.04	1:hsa;hsa-mir-200b,21,42,+	0.0622385	0.0446181
hsa-miR-5191	2	2	2	0.06	0.04	1:hsa;hsa-mir-5191,72,93,+	0.0622385	0.0446181
hsa-miR-3692-5p	1	2	2	0.06	0.04	6:hsa;hsa-mir-3692,6,29,+	0.0622385	0.0446181
hsa-miR-219a-5p	2	2	1.5	0.06	0.04	9:hsa;hsa-mir-219a-2,19,39,-	0.0466789	0.0334636
hsa-miR-6799-3p	2	2	2	0.06	0.04	19:hsa;hsa-mir-6799,47,69,+	0.0622385	0.0446181
hsa-miR-6726-5p	2	2	2	0.06	0.04	1:hsa;hsa-mir-6726,6,26,-	0.0622385	0.0446181
hsa-miR-6789-3p	2	2	2	0.06	0.04	19:hsa;hsa-mir-6789,78,98,-	0.0622385	0.0446181
hsa-miR-4536-3p	2	2	1	0.06	0.04	X:hsa;hsa-mir-4536-1,68,88,-	0.0311193	0.022309
hsa-miR-412-3p	2	2	2	0.06	0.04	14:hsa;hsa-mir-412,54,76,+	0.0622385	0.0446181
hsa-miR-6871-5p	2	2	2	0.06	0.04	20:hsa;hsa-mir-6871,6,27,+	0.0622385	0.0446181
hsa-miR-3685	2	2	2	0.06	0.04	12:hsa;hsa-mir-3685,6,27,+	0.0622385	0.0446181
hsa-miR-2467-5p	2	2	2	0.06	0.04	2:hsa;hsa-mir-2467,12,34,-	0.0622385	0.0446181
hsa-miR-4753-5p	2	2	2	0.06	0.04	1:hsa;hsa-mir-4753,10,31,-	0.0622385	0.0446181
hsa-miR-3910	2	2	1	0.06	0.04	9:hsa;hsa-mir-3910-1,63,82,+	0.0311193	0.022309
hsv1-miR-H27	2	2	1	0.06	0.04	JQ673480:hsv1;hsv1-mir-H27,59,81,-	0.0311193	0.022309
hsa-miR-6511a-3p	2	2	0.12	0.06	0.04	16:hsa;hsa-mir-6511a-3,44,65,-	0.00388991	0.00278863
hsa-miR-1284	2	2	2	0.06	0.04	3:hsa;hsa-mir-1284,30,51,-	0.0622385	0.0446181
hsa-miR-6511a-3p	2	2	0.12	0.06	0.04	16:hsa;hsa-mir-6511a-3,44,65,+	0.00388991	0.00278863
hsa-miR-4665-5p	2	2	2	0.06	0.04	9:hsa;hsa-mir-4665,10,32,+	0.0622385	0.0446181
hsa-miR-483-5p	2	2	2	0.06	0.04	11:hsa;hsa-mir-483,8,29,-	0.0622385	0.0446181
hsa-miR-3611	1	2	2	0.06	0.04	10:hsa;hsa-mir-3611,52,72,-	0.0622385	0.0446181
hsa-miR-4536-3p	2	2	1	0.06	0.04	X:hsa;hsa-mir-4536-2,68,88,+	0.0311193	0.022309
hsa-miR-758-5p	2	2	2	0.06	0.04	14:hsa;hsa-mir-758,15,36,+	0.0622385	0.0446181
hsa-miR-4688	2	2	2	0.06	0.04	11:hsa;hsa-mir-4688,55,76,+	0.0622385	0.0446181
hsa-miR-4661-3p	2	2	2	0.06	0.04	8:hsa;hsa-mir-4661,47,68,+	0.0622385	0.0446181
hsa-miR-218-2-3p	2	2	2	0.06	0.04	5:hsa;hsa-mir-218-2,67,88,-	0.0622385	0.0446181
hsa-miR-766-5p	2	2	2	0.06	0.04	X:hsa;hsa-mir-766,29,50,-	0.0622385	0.0446181
hsa-miR-675-5p	2	2	1	0.06	0.04	KI270721.1:hsa;hsa-mir-675,10,32,-	0.0311193	0.022309
hsa-miR-519a-3p	2	2	1	0.06	0.04	19:hsa;hsa-mir-519a-1,53,74,+	0.0311193	0.022309
hsa-miR-6511a-3p	2	2	0.12	0.06	0.04	16:hsa;hsa-mir-6511a-3,44,65,+	0.00388991	0.00278863
hsa-miR-6750-5p	2	2	2	0.06	0.04	11:hsa;hsa-mir-6750,6,29,-	0.0622385	0.0446181
hsa-miR-3529-5p	2	2	2	0.06	0.04	15:hsa;hsa-mir-3529,10,31,-	0.0622385	0.0446181
hsa-miR-4714-5p	2	2	2	0.06	0.04	15:hsa;hsa-mir-4714,10,31,+	0.0622385	0.0446181
hsa-miR-33b-5p	2	2	2	0.06	0.04	17:hsa;hsa-mir-33b,16,35,-	0.0622385	0.0446181
hsa-miR-6511a-3p	2	2	0.12	0.06	0.04	16:hsa;hsa-mir-6511a-2,44,65,-	0.00388991	0.00278863
hsa-miR-3182	2	2	2	0.06	0.04	16:hsa;hsa-mir-3182,4,20,+	0.0622385	0.0446181
hsa-miR-6762-3p	2	2	2	0.06	0.04	12:hsa;hsa-mir-6762,64,86,+	0.0622385	0.0446181
hsa-miR-183-3p	2	2	2	0.06	0.04	7:hsa;hsa-mir-183,66,87,-	0.0622385	0.0446181
hsa-miR-4523	2	2	2	0.06	0.04	17:hsa;hsa-mir-4523,7,27,+	0.0622385	0.0446181
hsa-miR-6886-5p	1	2	2	0.06	0.04	19:hsa;hsa-mir-6886,6,26,+	0.0622385	0.0446181
hsa-miR-6850-5p	2	2	2	0.06	0.04	8:hsa;hsa-mir-6850,1,22,-	0.0622385	0.0446181
hsa-miR-6511a-3p	2	2	0.12	0.06	0.04	16:hsa;hsa-mir-6511a-1,44,65,-	0.00388991	0.00278863
hsa-miR-4745-3p	2	2	2	0.06	0.04	19:hsa;hsa-mir-4745,38,60,+	0.0622385	0.0446181
hsa-miR-1267	2	2	2	0.06	0.04	13:hsa;hsa-mir-1267,12,32,-	0.0622385	0.0446181
hsa-miR-6511a-3p	2	2	0.12	0.06	0.04	16:hsa;hsa-mir-6511a-1,44,65,+	0.00388991	0.00278863
hsa-miR-616-3p	2	2	2	0.06	0.04	12:hsa;hsa-mir-616,56,77,-	0.0622385	0.0446181
hsa-miR-6511a-3p	2	2	0.12	0.06	0.04	16:hsa;hsa-mir-6511a-3,44,65,+	0.00388991	0.00278863
hsa-miR-6798-5p	2	2	2	0.06	0.04	19:hsa;hsa-mir-6798,6,28,+	0.0622385	0.0446181
hsa-miR-1908-3p	2	2	2	0.06	0.04	11:hsa;hsa-mir-1908,49,69,-	0.0622385	0.0446181
hsa-miR-3617-3p	2	2	2	0.06	0.04	20:hsa;hsa-mir-3617,50,72,-	0.0622385	0.0446181
hsa-miR-302d-3p	2	2	2	0.06	0.04	4:hsa;hsa-mir-302d,44,66,-	0.0622385	0.0446181
hsa-miR-6889-5p	1	2	2	0.06	0.04	22:hsa;hsa-mir-6889,6,28,-	0.0622385	0.0446181
hsa-miR-4765	2	2	2	0.06	0.04	2:hsa;hsa-mir-4765,46,67,+	0.0622385	0.0446181
hsa-miR-4465	2	2	2	0.06	0.04	6:hsa;hsa-mir-4465,42,63,+	0.0622385	0.0446181
hsa-miR-4762-5p	2	2	2	0.06	0.04	22:hsa;hsa-mir-4762,9,29,+	0.0622385	0.0446181
hsa-miR-144-3p	2	2	2	0.06	0.04	17:hsa;hsa-mir-144,52,71,-	0.0622385	0.0446181
hsa-miR-3177-5p	2	2	2	0.06	0.04	16:hsa;hsa-mir-3177,11,33,+	0.0622385	0.0446181
hsa-miR-202-3p	2	2	2	0.06	0.04	10:hsa;hsa-mir-202,64,83,-	0.0622385	0.0446181
hsa-miR-6895-3p	1	2	2	0.06	0.04	X:hsa;hsa-mir-6895,57,78,-	0.0622385	0.0446181
hsa-miR-4524a-3p	2	2	2	0.06	0.04	17:hsa;hsa-mir-4524a,42,63,-	0.0622385	0.0446181
hsa-miR-499a-3p	2	2	2	0.06	0.04	20:hsa;hsa-mir-499a,70,91,+	0.0622385	0.0446181
hsa-miR-3135a	2	2	2	0.06	0.04	3:hsa;hsa-mir-3135a,10,31,+	0.0622385	0.0446181
hsa-miR-4449	2	2	2	0.06	0.04	4:hsa;hsa-mir-4449,39,60,+	0.0622385	0.0446181
hsa-miR-3678-3p	1	2	2	0.06	0.04	17:hsa;hsa-mir-3678,69,90,+	0.0622385	0.0446181
hsa-miR-6511a-3p	2	2	0.12	0.06	0.04	16:hsa;hsa-mir-6511a-2,44,65,+	0.00388991	0.00278863
hsa-miR-578	1	2	2	0.06	0.04	4:hsa;hsa-mir-578,61,81,+	0.0622385	0.0446181
hsa-miR-4491	2	2	2	0.06	0.04	11:hsa;hsa-mir-4491,46,67,+	0.0622385	0.0446181
hsa-miR-4439	2	2	2	0.06	0.04	2:hsa;hsa-mir-4439,4,25,-	0.0622385	0.0446181
hsa-miR-4761-5p	2	2	2	0.06	0.04	22:hsa;hsa-mir-4761,3,23,+	0.0622385	0.0446181
hsa-miR-138-2-3p	2	2	2	0.06	0.04	16:hsa;hsa-mir-138-2,57,78,+	0.0622385	0.0446181
hsa-miR-5088-5p	2	2	2	0.06	0.04	19:hsa;hsa-mir-5088,6,29,+	0.0622385	0.0446181
hsa-miR-6892-5p	2	2	2	0.06	0.04	7:hsa;hsa-mir-6892,1,21,+	0.0622385	0.0446181
hsa-miR-1258	2	2	2	0.06	0.04	2:hsa;hsa-mir-1258,44,64,-	0.0622385	0.0446181
hsa-miR-3139	2	2	2	0.06	0.04	4:hsa;hsa-mir-3139,10,32,+	0.0622385	0.0446181
hsa-miR-8058	2	2	2	0.06	0.04	16:hsa;hsa-mir-8058,58,79,+	0.0622385	0.0446181
hsa-miR-6759-5p	2	2	2	0.06	0.04	12:hsa;hsa-mir-6759,6,27,-	0.0622385	0.0446181
hsa-miR-7703	2	2	2	0.06	0.04	14:hsa;hsa-mir-7703,55,77,-	0.0622385	0.0446181
hsa-miR-181d-3p	2	2	2	0.06	0.04	19:hsa;hsa-mir-181d,79,99,+	0.0622385	0.0446181
hsa-miR-4746-3p	2	2	2	0.06	0.04	19:hsa;hsa-mir-4746,44,64,+	0.0622385	0.0446181
hsa-miR-6511a-3p	2	2	0.12	0.06	0.04	16:hsa;hsa-mir-6511a-4,44,65,+	0.00388991	0.00278863
hsa-miR-6741-3p	1	2	2	0.06	0.04	1:hsa;hsa-mir-6741,42,63,-	0.0622385	0.0446181
hsa-miR-3917	2	2	2	0.06	0.04	1:hsa;hsa-mir-3917,52,71,-	0.0622385	0.0446181
hsa-miR-4504	2	2	2	0.06	0.04	14:hsa;hsa-mir-4504,55,76,-	0.0622385	0.0446181
hsa-miR-188-3p	2	2	2	0.06	0.04	X:hsa;hsa-mir-188,54,74,+	0.0622385	0.0446181
hsa-miR-516b-5p	2	2	2	0.06	0.04	19:hsa;hsa-mir-516b-1,16,37,+	0.0622385	0.0446181
hsa-miR-338-5p	1	2	2	0.06	0.04	17:hsa;hsa-mir-338,6,27,-	0.0622385	0.0446181
hsa-miR-5008-5p	2	2	2	0.06	0.04	1:hsa;hsa-mir-5008,22,43,-	0.0622385	0.0446181
hsa-miR-6802-5p	2	2	2	0.06	0.04	19:hsa;hsa-mir-6802,6,25,-	0.0622385	0.0446181
hsa-miR-3126-3p	2	2	2	0.06	0.04	2:hsa;hsa-mir-3126,46,67,+	0.0622385	0.0446181
hsa-miR-450b-3p	2	2	2	0.06	0.04	X:hsa;hsa-mir-450b,48,69,-	0.0622385	0.0446181
hsa-miR-602	2	2	2	0.06	0.04	9:hsa;hsa-mir-602,16,38,+	0.0622385	0.0446181
hsa-miR-6511a-3p	2	2	0.12	0.06	0.04	16:hsa;hsa-mir-6511a-1,44,65,+	0.00388991	0.00278863
hsa-miR-3115	2	2	2	0.06	0.04	1:hsa;hsa-mir-3115,6,25,+	0.0622385	0.0446181
hsa-miR-371a-5p	2	2	2	0.06	0.04	19:hsa;hsa-mir-371a,6,25,+	0.0622385	0.0446181
hsa-miR-6730-5p	2	2	2	0.06	0.04	1:hsa;hsa-mir-6730,6,28,-	0.0622385	0.0446181
hsv1-miR-H27	2	2	1	0.06	0.04	JQ673480:hsv1;hsv1-mir-H27,59,81,+	0.0311193	0.022309
hsa-miR-6511a-3p	2	2	0.12	0.06	0.04	16:hsa;hsa-mir-6511a-4,44,65,+	0.00388991	0.00278863
hsa-miR-6511a-3p	2	2	0.12	0.06	0.04	16:hsa;hsa-mir-6511a-4,44,65,+	0.00388991	0.00278863
hsa-miR-4664-5p	2	2	2	0.06	0.04	8:hsa;hsa-mir-4664,10,31,-	0.0622385	0.0446181
hsa-miR-6511a-3p	2	2	0.12	0.06	0.04	16:hsa;hsa-mir-6511a-1,44,65,+	0.00388991	0.00278863
hsa-miR-675-5p	2	2	1	0.06	0.04	11:hsa;hsa-mir-675,10,32,-	0.0311193	0.022309
hsa-miR-4788	2	2	2	0.06	0.04	3:hsa;hsa-mir-4788,10,31,+	0.0622385	0.0446181
hsa-miR-6761-5p	2	2	2	0.06	0.04	12:hsa;hsa-mir-6761,6,26,+	0.0622385	0.0446181
hsa-miR-548aw	1	2	2	0.06	0.04	9:hsa;hsa-mir-548aw,8,27,+	0.0622385	0.0446181
hsa-miR-3607-5p	2	2	2	0.06	0.04	5:hsa;hsa-mir-3607,12,33,+	0.0622385	0.0446181
hsa-miR-3938	2	2	2	0.06	0.04	3:hsa;hsa-mir-3938,59,80,-	0.0622385	0.0446181
hsa-miR-6807-5p	2	2	2	0.06	0.04	19:hsa;hsa-mir-6807,1,22,+	0.0622385	0.0446181
hsa-miR-4648	2	2	2	0.06	0.04	7:hsa;hsa-mir-4648,1,20,+	0.0622385	0.0446181
hsa-miR-3614-3p	1	2	2	0.06	0.04	17:hsa;hsa-mir-3614,53,75,-	0.0622385	0.0446181
hsa-miR-519a-3p	2	2	1	0.06	0.04	19:hsa;hsa-mir-519a-2,54,75,+	0.0311193	0.022309
hsa-miR-548l	2	2	2	0.06	0.04	11:hsa;hsa-mir-548l,15,36,-	0.0622385	0.0446181
hsa-miR-95-3p	2	2	2	0.06	0.04	4:hsa;hsa-mir-95,49,70,-	0.0622385	0.0446181
hsa-miR-6511a-3p	2	2	0.12	0.06	0.04	16:hsa;hsa-mir-6511a-4,44,65,-	0.00388991	0.00278863
hsa-miR-6511a-3p	2	2	0.12	0.06	0.04	16:hsa;hsa-mir-6511a-2,44,65,+	0.00388991	0.00278863
hsa-miR-4795-5p	2	2	2	0.06	0.04	3:hsa;hsa-mir-4795,18,38,-	0.0622385	0.0446181
hsa-miR-4795-3p	2	2	2	0.06	0.04	3:hsa;hsa-mir-4795,58,79,-	0.0622385	0.0446181
hsa-miR-6511a-3p	2	2	0.12	0.06	0.04	16:hsa;hsa-mir-6511a-2,44,65,+	0.00388991	0.00278863
hsa-miR-5194	1	1	1	0.03	0.02	8:hsa;hsa-mir-5194,73,94,-	0.0311193	0.022309
hsa-miR-7113-3p	1	1	1	0.03	0.02	11:hsa;hsa-mir-7113,37,59,+	0.0311193	0.022309
hsa-miR-6515-3p	1	1	1	0.03	0.02	19:hsa;hsa-mir-6515,38,57,+	0.0311193	0.022309
hsa-miR-4306	1	1	1	0.03	0.02	13:hsa;hsa-mir-4306,65,81,+	0.0311193	0.022309
hsa-miR-4730	1	1	1	0.03	0.02	17:hsa;hsa-mir-4730,10,32,+	0.0311193	0.022309
hsa-miR-3663-3p	1	1	1	0.03	0.02	10:hsa;hsa-mir-3663,58,80,-	0.0311193	0.022309
hsa-miR-765	1	1	1	0.03	0.02	1:hsa;hsa-mir-765,69,89,-	0.0311193	0.022309
hsa-miR-4735-5p	1	1	1	0.03	0.02	1:hsa;hsa-mir-4735,8,29,-	0.0311193	0.022309
hsa-miR-4712-3p	1	1	1	0.03	0.02	15:hsa;hsa-mir-4712,57,77,+	0.0311193	0.022309
hsa-miR-3198	1	1	0.5	0.03	0.02	22:hsa;hsa-mir-3198-1,49,70,-	0.0155596	0.0111545
hsa-miR-3692-3p	1	1	1	0.03	0.02	6:hsa;hsa-mir-3692,44,67,+	0.0311193	0.022309
hsa-miR-219a-2-3p	1	1	1	0.03	0.02	9:hsa;hsa-mir-219a-2,62,83,-	0.0311193	0.022309
hsa-miR-3164	1	1	1	0.03	0.02	11:hsa;hsa-mir-3164,10,31,+	0.0311193	0.022309
hsa-miR-4710	1	1	1	0.03	0.02	14:hsa;hsa-mir-4710,10,27,-	0.0311193	0.022309
hsa-miR-3074-3p	1	1	1	0.03	0.02	9:hsa;hsa-mir-3074,50,71,-	0.0311193	0.022309
hsa-miR-4433b-5p	1	1	1	0.03	0.02	2:hsa;hsa-mir-4433b,20,40,-	0.0311193	0.022309
hsa-miR-6840-3p	1	1	1	0.03	0.02	7:hsa;hsa-mir-6840,46,67,+	0.0311193	0.022309
hsa-miR-6511b-5p	1	1	0.25	0.03	0.02	16:hsa;hsa-mir-6511b-1,11,34,-	0.00777982	0.00557726
hsa-miR-6859-3p	1	1	0.06	0.03	0.02	1:hsa;hsa-mir-6859-2,46,68,-	0.00194495	0.00139432
hsa-miR-6859-3p	1	1	0.06	0.03	0.02	16:hsa;hsa-mir-6859-4,46,68,-	0.00194495	0.00139432
hsa-miR-6856-3p	1	1	1	0.03	0.02	9:hsa;hsa-mir-6856,46,67,+	0.0311193	0.022309
hsa-miR-544b	1	1	1	0.03	0.02	3:hsa;hsa-mir-544b,48,69,+	0.0311193	0.022309
hsa-miR-6791-3p	1	1	1	0.03	0.02	19:hsa;hsa-mir-6791,47,67,-	0.0311193	0.022309
hsa-miR-3145-3p	1	1	1	0.03	0.02	6:hsa;hsa-mir-3145,49,72,-	0.0311193	0.022309
hsa-miR-4747-5p	1	1	1	0.03	0.02	19:hsa;hsa-mir-4747,1,22,+	0.0311193	0.022309
hsa-miR-4747-3p	1	1	1	0.03	0.02	19:hsa;hsa-mir-4747,33,54,+	0.0311193	0.022309
hsa-miR-6859-3p	1	1	0.06	0.03	0.02	15:hsa;hsa-mir-6859-1,46,68,+	0.00194495	0.00139432
hsa-miR-6871-3p	1	1	1	0.03	0.02	20:hsa;hsa-mir-6871,35,56,+	0.0311193	0.022309
hsa-miR-1305	1	1	1	0.03	0.02	4:hsa;hsa-mir-1305,51,72,+	0.0311193	0.022309
hsa-miR-3159	1	1	1	0.03	0.02	11:hsa;hsa-mir-3159,10,31,+	0.0311193	0.022309
hsa-miR-2115-3p	1	1	1	0.03	0.02	3:hsa;hsa-mir-2115,58,79,-	0.0311193	0.022309
hsa-miR-2467-3p	1	1	1	0.03	0.02	2:hsa;hsa-mir-2467,52,73,-	0.0311193	0.022309
hsa-miR-6511b-5p	1	1	0.25	0.03	0.02	16:hsa;hsa-mir-6511b-2,6,29,-	0.00777982	0.00557726
hsa-miR-6859-3p	1	1	0.06	0.03	0.02	1:hsa;hsa-mir-6859-3,46,68,-	0.00194495	0.00139432
hsa-miR-551b-3p	1	1	1	0.03	0.02	3:hsa;hsa-mir-551b,61,81,+	0.0311193	0.022309
hsa-miR-548av-5p	1	1	1	0.03	0.02	18:hsa;hsa-mir-548av,1,18,-	0.0311193	0.022309
hsa-miR-3187-5p	1	1	1	0.03	0.02	19:hsa;hsa-mir-3187,7,29,+	0.0311193	0.022309
hsa-miR-6786-3p	1	1	1	0.03	0.02	17:hsa;hsa-mir-6786,88,110,+	0.0311193	0.022309
hsa-miR-3664-3p	1	1	1	0.03	0.02	11:hsa;hsa-mir-3664,59,80,-	0.0311193	0.022309
hsa-miR-6859-3p	1	1	0.06	0.03	0.02	15:hsa;hsa-mir-6859-4,46,68,+	0.00194495	0.00139432
hsa-miR-3132	1	1	1	0.03	0.02	2:hsa;hsa-mir-3132,8,31,-	0.0311193	0.022309
hsa-miR-6735-3p	1	1	1	0.03	0.02	1:hsa;hsa-mir-6735,52,73,+	0.0311193	0.022309
hsa-miR-548p	1	1	1	0.03	0.02	5:hsa;hsa-mir-548p,47,68,-	0.0311193	0.022309
hsa-miR-6859-3p	1	1	0.06	0.03	0.02	1:hsa;hsa-mir-6859-4,46,68,-	0.00194495	0.00139432
hsa-miR-7850-5p	1	1	1	0.03	0.02	19:hsa;hsa-mir-7850,9,29,+	0.0311193	0.022309
hsa-miR-3652	1	1	1	0.03	0.02	12:hsa;hsa-mir-3652,1,18,+	0.0311193	0.022309
hsa-miR-4671-5p	1	1	1	0.03	0.02	1:hsa;hsa-mir-4671,10,31,+	0.0311193	0.022309
hsa-miR-4671-3p	1	1	1	0.03	0.02	1:hsa;hsa-mir-4671,46,66,+	0.0311193	0.022309
hsa-miR-4764-3p	1	1	1	0.03	0.02	22:hsa;hsa-mir-4764,61,82,-	0.0311193	0.022309
hsa-miR-4757-3p	1	1	1	0.03	0.02	2:hsa;hsa-mir-4757,48,69,+	0.0311193	0.022309
hsa-miR-4650-3p	1	1	0.25	0.03	0.02	7:hsa;hsa-mir-4650-1,46,66,-	0.00777982	0.00557726
hsa-miR-3151-3p	1	1	1	0.03	0.02	8:hsa;hsa-mir-3151,49,68,+	0.0311193	0.022309
hsa-miR-638	1	1	1	0.03	0.02	19:hsa;hsa-mir-638,16,40,+	0.0311193	0.022309
hsa-miR-6804-5p	1	1	1	0.03	0.02	19:hsa;hsa-mir-6804,6,26,-	0.0311193	0.022309
hsa-miR-5580-5p	1	1	1	0.03	0.02	14:hsa;hsa-mir-5580,1,22,-	0.0311193	0.022309
hsa-miR-3675-3p	1	1	0.5	0.03	0.02	KI270714.1:hsa;hsa-mir-3675,43,64,+	0.0155596	0.0111545
hsa-miR-6854-3p	1	1	1	0.03	0.02	9:hsa;hsa-mir-6854,49,69,-	0.0311193	0.022309
hsa-miR-6506-3p	1	1	1	0.03	0.02	16:hsa;hsa-mir-6506,44,65,-	0.0311193	0.022309
hsa-miR-548s	1	1	1	0.03	0.02	2:hsa;hsa-mir-548s,52,74,+	0.0311193	0.022309
hsa-miR-449b-5p	1	1	1	0.03	0.02	5:hsa;hsa-mir-449b,16,37,-	0.0311193	0.022309
hsa-miR-4421	1	1	1	0.03	0.02	1:hsa;hsa-mir-4421,43,64,+	0.0311193	0.022309
hsa-miR-6859-3p	1	1	0.06	0.03	0.02	1:hsa;hsa-mir-6859-3,46,68,-	0.00194495	0.00139432
hsa-miR-663a	1	1	1	0.03	0.02	20:hsa;hsa-mir-663a,15,36,-	0.0311193	0.022309
hsa-miR-6757-3p	1	1	1	0.03	0.02	12:hsa;hsa-mir-6757,47,68,+	0.0311193	0.022309
hsa-miR-6728-5p	1	1	1	0.03	0.02	1:hsa;hsa-mir-6728,6,28,-	0.0311193	0.022309
hsa-miR-5687	1	1	1	0.03	0.02	5:hsa;hsa-mir-5687,47,68,-	0.0311193	0.022309
hsa-miR-6834-3p	1	1	1	0.03	0.02	6:hsa;hsa-mir-6834,61,80,+	0.0311193	0.022309
hsa-miR-548au-3p	1	1	1	0.03	0.02	9:hsa;hsa-mir-548au,34,54,+	0.0311193	0.022309
hsa-miR-6775-3p	1	1	1	0.03	0.02	16:hsa;hsa-mir-6775,49,69,-	0.0311193	0.022309
hsa-miR-6785-5p	1	1	1	0.03	0.02	17:hsa;hsa-mir-6785,6,27,+	0.0311193	0.022309
hsa-miR-378g	1	1	1	0.03	0.02	1:hsa;hsa-mir-378g,2,21,-	0.0311193	0.022309
hsa-miR-6772-5p	1	1	1	0.03	0.02	16:hsa;hsa-mir-6772,6,27,-	0.0311193	0.022309
hsa-miR-3117-5p	1	1	1	0.03	0.02	1:hsa;hsa-mir-3117,13,32,+	0.0311193	0.022309
hsa-miR-6510-3p	1	1	1	0.03	0.02	17:hsa;hsa-mir-6510,32,52,-	0.0311193	0.022309
hsa-miR-3150a-3p	1	1	1	0.03	0.02	8:hsa;hsa-mir-3150a,49,70,+	0.0311193	0.022309
hsa-miR-4657	1	1	1	0.03	0.02	7:hsa;hsa-mir-4657,1,23,-	0.0311193	0.022309
hsa-miR-6859-3p	1	1	0.06	0.03	0.02	16:hsa;hsa-mir-6859-1,46,68,-	0.00194495	0.00139432
hsa-miR-6793-3p	1	1	1	0.03	0.02	19:hsa;hsa-mir-6793,44,63,+	0.0311193	0.022309
hsa-miR-6859-3p	1	1	0.06	0.03	0.02	1:hsa;hsa-mir-6859-1,46,68,-	0.00194495	0.00139432
hsa-miR-4711-5p	1	1	1	0.03	0.02	1:hsa;hsa-mir-4711,6,28,-	0.0311193	0.022309
hsa-miR-4711-3p	1	1	1	0.03	0.02	1:hsa;hsa-mir-4711,45,62,-	0.0311193	0.022309
hsa-miR-4749-5p	1	1	1	0.03	0.02	19:hsa;hsa-mir-4749,3,24,+	0.0311193	0.022309
hsa-miR-150-3p	1	1	1	0.03	0.02	19:hsa;hsa-mir-150,51,72,-	0.0311193	0.022309
hsa-miR-3682-5p	1	1	1	0.03	0.02	2:hsa;hsa-mir-3682,15,36,-	0.0311193	0.022309
hsa-miR-4646-5p	1	1	1	0.03	0.02	6:hsa;hsa-mir-4646,1,22,-	0.0311193	0.022309
hsa-miR-4646-3p	1	1	1	0.03	0.02	6:hsa;hsa-mir-4646,43,63,-	0.0311193	0.022309
hsa-miR-6881-5p	1	1	1	0.03	0.02	15:hsa;hsa-mir-6881,6,27,-	0.0311193	0.022309
hsa-miR-3616-5p	1	1	1	0.03	0.02	20:hsa;hsa-mir-3616,19,40,+	0.0311193	0.022309
hsa-miR-548ac	1	1	1	0.03	0.02	1:hsa;hsa-mir-548ac,53,74,-	0.0311193	0.022309
hsa-miR-141-5p	1	1	1	0.03	0.02	12:hsa;hsa-mir-141,17,38,+	0.0311193	0.022309
hsa-miR-616-5p	1	1	1	0.03	0.02	12:hsa;hsa-mir-616,16,37,-	0.0311193	0.022309
hsa-miR-4999-3p	1	1	1	0.03	0.02	19:hsa;hsa-mir-4999,51,70,-	0.0311193	0.022309
hsa-miR-3922-5p	1	1	1	0.03	0.02	12:hsa;hsa-mir-3922,13,35,+	0.0311193	0.022309
hsa-miR-5009-5p	1	1	1	0.03	0.02	15:hsa;hsa-mir-5009,21,44,-	0.0311193	0.022309
hsa-miR-6853-3p	1	1	1	0.03	0.02	9:hsa;hsa-mir-6853,53,74,+	0.0311193	0.022309
hsa-miR-6743-3p	1	1	1	0.03	0.02	11:hsa;hsa-mir-6743,48,70,+	0.0311193	0.022309
hsa-miR-4512	1	1	1	0.03	0.02	15:hsa;hsa-mir-4512,49,70,-	0.0311193	0.022309
hsa-miR-3158-5p	1	1	1	0.03	0.02	10:hsa;hsa-mir-3158-2,13,33,-	0.0311193	0.022309
hsa-miR-6798-3p	1	1	1	0.03	0.02	19:hsa;hsa-mir-6798,47,67,+	0.0311193	0.022309
hsa-miR-3178	1	1	1	0.03	0.02	16:hsa;hsa-mir-3178,11,27,-	0.0311193	0.022309
hsa-miR-718	1	1	1	0.03	0.02	X:hsa;hsa-mir-718,42,62,-	0.0311193	0.022309
hsa-miR-208b-3p	1	1	1	0.03	0.02	14:hsa;hsa-mir-208b,46,67,-	0.0311193	0.022309
hsa-miR-4707-5p	1	1	1	0.03	0.02	14:hsa;hsa-mir-4707,10,32,-	0.0311193	0.022309
hsa-miR-4682	1	1	1	0.03	0.02	10:hsa;hsa-mir-4682,10,32,+	0.0311193	0.022309
hsa-miR-6836-5p	1	1	1	0.03	0.02	7:hsa;hsa-mir-6836,6,27,-	0.0311193	0.022309
hsa-miR-4451	1	1	1	0.03	0.02	4:hsa;hsa-mir-4451,48,64,+	0.0311193	0.022309
hsa-miR-6511b-5p	1	1	0.25	0.03	0.02	16:hsa;hsa-mir-6511b-2,6,29,-	0.00777982	0.00557726
hsa-miR-4783-3p	1	1	1	0.03	0.02	2:hsa;hsa-mir-4783,51,73,-	0.0311193	0.022309
hsa-miR-6509-3p	1	1	1	0.03	0.02	7:hsa;hsa-mir-6509,52,73,-	0.0311193	0.022309
hsa-miR-4793-3p	1	1	1	0.03	0.02	3:hsa;hsa-mir-4793,58,80,-	0.0311193	0.022309
hsa-miR-4787-5p	1	1	1	0.03	0.02	3:hsa;hsa-mir-4787,14,35,+	0.0311193	0.022309
hsa-miR-7155-5p	1	1	1	0.03	0.02	11:hsa;hsa-mir-7155,1,19,-	0.0311193	0.022309
hsa-miR-1206	1	1	1	0.03	0.02	8:hsa;hsa-mir-1206,4,24,+	0.0311193	0.022309
hsa-miR-6821-3p	1	1	1	0.03	0.02	22:hsa;hsa-mir-6821,54,74,+	0.0311193	0.022309
hsa-miR-3198	1	1	0.5	0.03	0.02	12:hsa;hsa-mir-3198-2,49,70,-	0.0155596	0.0111545
hsa-miR-3678-5p	1	1	1	0.03	0.02	17:hsa;hsa-mir-3678,9,28,+	0.0311193	0.022309
hsa-miR-378f	1	1	1	0.03	0.02	1:hsa;hsa-mir-378f,52,71,+	0.0311193	0.022309
hsa-miR-4742-5p	1	1	1	0.03	0.02	1:hsa;hsa-mir-4742,1,23,-	0.0311193	0.022309
hsa-miR-6768-5p	1	1	1	0.03	0.02	16:hsa;hsa-mir-6768,6,28,+	0.0311193	0.022309
hsa-miR-6768-3p	1	1	1	0.03	0.02	16:hsa;hsa-mir-6768,45,68,+	0.0311193	0.022309
hsa-miR-205-5p	1	1	1	0.03	0.02	1:hsa;hsa-mir-205,34,55,+	0.0311193	0.022309
hsa-miR-6859-3p	1	1	0.06	0.03	0.02	15:hsa;hsa-mir-6859-3,46,68,+	0.00194495	0.00139432
hsa-miR-7851-3p	1	1	1	0.03	0.02	12:hsa;hsa-mir-7851,99,120,-	0.0311193	0.022309
hsa-miR-203b-3p	1	1	1	0.03	0.02	14:hsa;hsa-mir-203b,54,76,-	0.0311193	0.022309
hsa-miR-6739-3p	1	1	1	0.03	0.02	1:hsa;hsa-mir-6739,55,75,+	0.0311193	0.022309
hsa-miR-4254	1	1	1	0.03	0.02	1:hsa;hsa-mir-4254,44,66,-	0.0311193	0.022309
hsa-miR-4650-3p	1	1	0.25	0.03	0.02	7:hsa;hsa-mir-4650-1,46,66,+	0.00777982	0.00557726
hsa-miR-6766-5p	1	1	1	0.03	0.02	15:hsa;hsa-mir-6766,6,29,-	0.0311193	0.022309
hsa-miR-6766-3p	1	1	1	0.03	0.02	15:hsa;hsa-mir-6766,48,69,-	0.0311193	0.022309
hsa-miR-6874-5p	1	1	1	0.03	0.02	7:hsa;hsa-mir-6874,6,28,-	0.0311193	0.022309
hsa-miR-6874-3p	1	1	1	0.03	0.02	7:hsa;hsa-mir-6874,49,71,-	0.0311193	0.022309
hsa-miR-5187-5p	1	1	1	0.03	0.02	1:hsa;hsa-mir-5187,10,31,+	0.0311193	0.022309
hsa-miR-6732-3p	1	1	1	0.03	0.02	1:hsa;hsa-mir-6732,38,60,+	0.0311193	0.022309
hsa-miR-6820-5p	1	1	1	0.03	0.02	22:hsa;hsa-mir-6820,6,24,+	0.0311193	0.022309
hsa-miR-6820-3p	1	1	1	0.03	0.02	22:hsa;hsa-mir-6820,41,62,+	0.0311193	0.022309
hsa-miR-572	1	1	1	0.03	0.02	4:hsa;hsa-mir-572,61,80,+	0.0311193	0.022309
hsa-miR-4667-5p	1	1	1	0.03	0.02	9:hsa;hsa-mir-4667,3,24,+	0.0311193	0.022309
hsa-miR-3184-3p	1	1	1	0.03	0.02	17:hsa;hsa-mir-3184,44,66,-	0.0311193	0.022309
hsa-miR-7108-5p	1	1	1	0.03	0.02	19:hsa;hsa-mir-7108,1,21,-	0.0311193	0.022309
hsa-miR-1261	1	1	1	0.03	0.02	11:hsa;hsa-mir-1261,5,23,-	0.0311193	0.022309
hsa-miR-548ba	1	1	1	0.03	0.02	2:hsa;hsa-mir-548ba,1,22,+	0.0311193	0.022309
hsa-miR-1288-5p	1	1	1	0.03	0.02	17:hsa;hsa-mir-1288,15,37,+	0.0311193	0.022309
hsa-miR-7641	1	1	1	0.03	0.02	11:hsa;hsa-mir-7641-1,7,25,+	0.0311193	0.022309
hsa-miR-4770	1	1	1	0.03	0.02	X:hsa;hsa-mir-4770,40,57,-	0.0311193	0.022309
hsa-miR-5003-3p	1	1	1	0.03	0.02	5:hsa;hsa-mir-5003,58,78,+	0.0311193	0.022309
hsa-miR-3202	1	1	0.5	0.03	0.02	X:hsa;hsa-mir-3202-1,9,30,+	0.0155596	0.0111545
hsa-miR-3202	1	1	0.5	0.03	0.02	X:hsa;hsa-mir-3202-2,8,29,-	0.0155596	0.0111545
hsa-miR-3654	1	1	1	0.03	0.02	7:hsa;hsa-mir-3654,38,56,-	0.0311193	0.022309
hsa-miR-509-5p	1	1	0.33	0.03	0.02	X:hsa;hsa-mir-509-2,20,40,-	0.0103731	0.00743635
hsa-miR-509-3p	1	1	0.25	0.03	0.02	X:hsa;hsa-mir-509-2,55,76,-	0.00777982	0.00557726
hsa-miR-4700-5p	1	1	1	0.03	0.02	12:hsa;hsa-mir-4700,10,31,+	0.0311193	0.022309
hsa-miR-509-3-5p	1	1	1	0.03	0.02	X:hsa;hsa-mir-509-3,10,31,-	0.0311193	0.022309
hsa-miR-509-3p	1	1	0.25	0.03	0.02	X:hsa;hsa-mir-509-3,44,65,-	0.00777982	0.00557726
hsa-miR-6859-3p	1	1	0.06	0.03	0.02	1:hsa;hsa-mir-6859-4,46,68,-	0.00194495	0.00139432
hsa-miR-4650-3p	1	1	0.25	0.03	0.02	7:hsa;hsa-mir-4650-2,46,66,+	0.00777982	0.00557726
hsa-miR-3160-3p	1	1	0.5	0.03	0.02	11:hsa;hsa-mir-3160-2,52,73,+	0.0155596	0.0111545
hsa-miR-4740-5p	1	1	1	0.03	0.02	17:hsa;hsa-mir-4740,5,26,-	0.0311193	0.022309
hsa-miR-3923	1	1	1	0.03	0.02	3:hsa;hsa-mir-3923,51,72,+	0.0311193	0.022309
hsa-miR-4515	1	1	1	0.03	0.02	15:hsa;hsa-mir-4515,15,36,+	0.0311193	0.022309
hsa-miR-6787-5p	1	1	1	0.03	0.02	17:hsa;hsa-mir-6787,6,27,+	0.0311193	0.022309
hsa-miR-4635	1	1	1	0.03	0.02	5:hsa;hsa-mir-4635,51,71,-	0.0311193	0.022309
hsa-miR-3136-3p	1	1	1	0.03	0.02	3:hsa;hsa-mir-3136,49,70,-	0.0311193	0.022309
hsa-miR-6868-5p	1	1	1	0.03	0.02	17:hsa;hsa-mir-6868,6,27,-	0.0311193	0.022309
hsa-miR-6868-3p	1	1	1	0.03	0.02	17:hsa;hsa-mir-6868,38,58,-	0.0311193	0.022309
hsa-miR-4715-5p	1	1	1	0.03	0.02	15:hsa;hsa-mir-4715,10,31,-	0.0311193	0.022309
hsa-miR-6832-5p	1	1	1	0.03	0.02	6:hsa;hsa-mir-6832,6,28,+	0.0311193	0.022309
hsa-miR-6781-5p	1	1	1	0.03	0.02	17:hsa;hsa-mir-6781,6,26,-	0.0311193	0.022309
hsa-miR-3168	1	1	1	0.03	0.02	13:hsa;hsa-mir-3168,9,25,-	0.0311193	0.022309
hsa-miR-1231	1	1	1	0.03	0.02	1:hsa;hsa-mir-1231,5,24,+	0.0311193	0.022309
hsa-miR-4723-3p	1	1	1	0.03	0.02	17:hsa;hsa-mir-4723,59,80,+	0.0311193	0.022309
hsa-miR-3160-3p	1	1	0.5	0.03	0.02	11:hsa;hsa-mir-3160-1,54,75,-	0.0155596	0.0111545
hsa-miR-4731-3p	1	1	1	0.03	0.02	17:hsa;hsa-mir-4731,42,63,-	0.0311193	0.022309
hsa-miR-1273c	1	1	1	0.03	0.02	6:hsa;hsa-mir-1273c,10,31,+	0.0311193	0.022309
hsa-miR-509-5p	1	1	0.33	0.03	0.02	X:hsa;hsa-mir-509-2,20,40,-	0.0103731	0.00743635
hsa-miR-509-3p	1	1	0.25	0.03	0.02	X:hsa;hsa-mir-509-2,55,76,-	0.00777982	0.00557726
hsa-miR-6859-3p	1	1	0.06	0.03	0.02	15:hsa;hsa-mir-6859-2,46,68,+	0.00194495	0.00139432
hsa-miR-4728-3p	1	1	1	0.03	0.02	17:hsa;hsa-mir-4728,43,67,+	0.0311193	0.022309
hsa-miR-6859-3p	1	1	0.06	0.03	0.02	1:hsa;hsa-mir-6859-1,46,68,-	0.00194495	0.00139432
hsa-miR-4533	1	1	1	0.03	0.02	20:hsa;hsa-mir-4533,9,30,+	0.0311193	0.022309
hsa-miR-5588-5p	1	1	1	0.03	0.02	3:hsa;hsa-mir-5588,1,21,-	0.0311193	0.022309
hsa-miR-4766-5p	1	1	1	0.03	0.02	22:hsa;hsa-mir-4766,12,32,-	0.0311193	0.022309
hsa-miR-4766-3p	1	1	1	0.03	0.02	22:hsa;hsa-mir-4766,46,66,-	0.0311193	0.022309
hsa-miR-6825-5p	1	1	1	0.03	0.02	3:hsa;hsa-mir-6825,6,27,-	0.0311193	0.022309
hsa-miR-7-2-3p	1	1	1	0.03	0.02	15:hsa;hsa-mir-7-2,72,93,+	0.0311193	0.022309
hsa-miR-937-5p	1	1	1	0.03	0.02	8:hsa;hsa-mir-937,14,33,-	0.0311193	0.022309
hsa-miR-4750-3p	1	1	1	0.03	0.02	19:hsa;hsa-mir-4750,35,56,+	0.0311193	0.022309
hsa-miR-3162-5p	1	1	1	0.03	0.02	11:hsa;hsa-mir-3162,10,32,-	0.0311193	0.022309
hsa-miR-3675-3p	1	1	0.5	0.03	0.02	1:hsa;hsa-mir-3675,43,64,-	0.0155596	0.0111545
hsa-miR-6818-3p	1	1	1	0.03	0.02	22:hsa;hsa-mir-6818,44,65,+	0.0311193	0.022309
hsa-miR-6779-5p	1	1	1	0.03	0.02	17:hsa;hsa-mir-6779,6,26,+	0.0311193	0.022309
hsa-miR-3928-5p	1	1	1	0.03	0.02	22:hsa;hsa-mir-3928,3,25,-	0.0311193	0.022309
hsa-miR-4443	1	1	1	0.03	0.02	3:hsa;hsa-mir-4443,9,25,+	0.0311193	0.022309
hsa-miR-517a-3p	1	1	0.5	0.03	0.02	19:hsa;hsa-mir-517a,54,75,+	0.0155596	0.0111545
hsa-miR-4324	1	1	1	0.03	0.02	19:hsa;hsa-mir-4324,43,62,-	0.0311193	0.022309
hsa-miR-5010-5p	1	1	1	0.03	0.02	17:hsa;hsa-mir-5010,21,42,+	0.0311193	0.022309
hsa-miR-4429	1	1	1	0.03	0.02	2:hsa;hsa-mir-4429,7,26,-	0.0311193	0.022309
hsa-miR-4680-3p	1	1	1	0.03	0.02	10:hsa;hsa-mir-4680,42,62,+	0.0311193	0.022309
hsa-miR-548t-5p	1	1	1	0.03	0.02	4:hsa;hsa-mir-548t,10,30,+	0.0311193	0.022309
hsa-miR-1297	1	1	1	0.03	0.02	13:hsa;hsa-mir-1297,52,68,-	0.0311193	0.022309
hsa-miR-122-3p	1	1	1	0.03	0.02	18:hsa;hsa-mir-122,51,72,+	0.0311193	0.022309
hsa-miR-4529-3p	1	1	1	0.03	0.02	18:hsa;hsa-mir-4529,50,70,+	0.0311193	0.022309
hsa-miR-600	1	1	1	0.03	0.02	9:hsa;hsa-mir-600,61,83,-	0.0311193	0.022309
hsa-miR-509-5p	1	1	0.33	0.03	0.02	X:hsa;hsa-mir-509-1,20,40,-	0.0103731	0.00743635
hsa-miR-509-3p	1	1	0.25	0.03	0.02	X:hsa;hsa-mir-509-1,55,76,-	0.00777982	0.00557726
hsa-miR-584-3p	1	1	1	0.03	0.02	5:hsa;hsa-mir-584,55,76,-	0.0311193	0.022309
hsa-miR-6859-3p	1	1	0.06	0.03	0.02	16:hsa;hsa-mir-6859-3,46,68,-	0.00194495	0.00139432
hsa-miR-216b-5p	1	1	1	0.03	0.02	2:hsa;hsa-mir-216b,11,32,-	0.0311193	0.022309
hsa-miR-607	1	1	1	0.03	0.02	10:hsa;hsa-mir-607,61,81,-	0.0311193	0.022309
hsa-miR-3161	1	1	1	0.03	0.02	11:hsa;hsa-mir-3161,10,32,+	0.0311193	0.022309
hsa-miR-517b-3p	1	1	0.5	0.03	0.02	19:hsa;hsa-mir-517b,43,64,+	0.0155596	0.0111545
hsa-miR-659-3p	1	1	1	0.03	0.02	22:hsa;hsa-mir-659,61,82,-	0.0311193	0.022309
hsa-miR-4650-3p	1	1	0.25	0.03	0.02	7:hsa;hsa-mir-4650-2,46,66,-	0.00777982	0.00557726
hsa-miR-3190-5p	1	1	1	0.03	0.02	19:hsa;hsa-mir-3190,14,33,+	0.0311193	0.022309
hsa-miR-6754-5p	1	1	1	0.03	0.02	11:hsa;hsa-mir-6754,6,27,+	0.0311193	0.022309
hsa-miR-4733-5p	1	1	1	0.03	0.02	17:hsa;hsa-mir-4733,10,31,-	0.0311193	0.022309
hsa-miR-6859-3p	1	1	0.06	0.03	0.02	1:hsa;hsa-mir-6859-2,46,68,-	0.00194495	0.00139432
hsa-miR-6511b-5p	1	1	0.25	0.03	0.02	16:hsa;hsa-mir-6511b-1,11,34,-	0.00777982	0.00557726
hsa-miR-548e-5p	1	1	1	0.03	0.02	10:hsa;hsa-mir-548e,15,36,+	0.0311193	0.022309
hsa-miR-6859-3p	1	1	0.06	0.03	0.02	16:hsa;hsa-mir-6859-2,46,68,-	0.00194495	0.00139432
hsa-miR-135b-3p	1	1	1	0.03	0.02	1:hsa;hsa-mir-135b,55,76,-	0.0311193	0.022309
hsa-miR-19a-5p	1	1	1	0.03	0.02	13:hsa;hsa-mir-19a,14,35,+	0.0311193	0.022309
hsa-miR-211-5p	1	1	0.5	0.03	0.02	15:hsa;hsa-mir-211,26,47,-	0.0155596	0.0111545
hsa-miR-6134	1	1	1	0.03	0.02	X:hsa;hsa-mir-6134,71,89,-	0.0311193	0.022309

## Sheet: 8hpi-hsa
Table S2: Human (hsa-) and herpes simplex virus 1 (hsv1-) mature miRNAs detected in mock samples, and at 8 h.p.i., and 18 h.p.i.
HFF 8 h.p.i. - human miRNAs
name	unique reads	read count	read count (mult. map. adj.)	RPM (lib)	RPM (total)	coordinateString	RPM_adj (lib)	RPM_adj (total)
hsa-miR-21-5p	6258	12532937	12532937	390016	279598	17:hsa;hsa-mir-21,8,29,+	390016	279598
hsa-miR-100-5p	2807	2783185	2.77765e+06	86610.7	62090.2	11:hsa;hsa-mir-100,13,34,-	86438.5	61966.8
hsa-miR-143-3p	3269	2033418	2033418	63278.5	45363.6	5:hsa;hsa-mir-143,61,81,+	63278.5	45363.6
hsa-let-7i-5p	2431	1570436	1568214	48870.8	35034.9	12:hsa;hsa-let-7i,6,27,+	48801.7	34985.4
hsa-miR-199a-3p	3771	1103180	368623	34330.2	24610.9	1:hsa;hsa-mir-199a-2,70,91,-	11471.3	8223.64
hsa-miR-199b-3p	3731	1102172	367469	34298.8	24588.4	9:hsa;hsa-mir-199b,65,86,-	11435.4	8197.89
hsa-miR-199a-3p	3671	1102097	367414	34296.4	24586.7	19:hsa;hsa-mir-199a-1,47,68,-	11433.7	8196.66
hsa-let-7f-5p	1397	955595	485289	29737.4	21318.4	X:hsa;hsa-let-7f-2,8,29,-	15101.8	10826.3
hsa-let-7f-5p	1323	940667	470413	29272.9	20985.4	9:hsa;hsa-let-7f-1,7,28,+	14638.9	10494.5
hsa-miR-27b-3p	1724	681332	675066	21202.5	15199.9	9:hsa;hsa-mir-27b,61,81,+	21007.5	15060.1
hsa-miR-30a-5p	2541	663592	663264	20650.5	14804.1	6:hsa;hsa-mir-30a,6,27,-	20640.3	14796.8
hsa-miR-221-3p	3178	545037	545037	16961.2	12159.3	X:hsa;hsa-mir-221,65,87,-	16961.2	12159.3
hsa-miR-199a-5p	1806	519952	259479	16180.5	11599.6	19:hsa;hsa-mir-199a-1,6,28,-	8074.79	5788.73
hsa-miR-199a-5p	1805	519933	259460	16179.9	11599.2	1:hsa;hsa-mir-199a-2,31,53,-	8074.2	5788.3
hsa-let-7g-5p	1356	495544	489643	15421	11055.1	3:hsa;hsa-let-7g,5,26,-	15237.3	10923.5
hsa-let-7a-5p	1248	493283	164431	15350.6	11004.7	22:hsa;hsa-let-7a-3,4,25,+	5116.99	3668.31
hsa-let-7a-5p	1230	492974	164115	15341	10997.8	9:hsa;hsa-let-7a-1,6,27,+	5107.15	3661.26
hsa-let-7a-5p	1198	492777	163919	15334.9	10993.4	11:hsa;hsa-let-7a-2,5,26,-	5101.04	3656.88
hsa-miR-26a-5p	1611	474587	237567	14768.8	10587.6	12:hsa;hsa-mir-26a-2,14,35,-	7392.91	5299.89
hsa-miR-26a-5p	1574	474212	237192	14757.1	10579.2	3:hsa;hsa-mir-26a-1,10,31,+	7381.24	5291.53
hsa-miR-222-3p	3271	460222	460222	14321.8	10267.1	X:hsa;hsa-mir-222,69,89,-	14321.8	10267.1
hsa-miR-148a-3p	916	399179	398386	12422.2	8905.3	7:hsa;hsa-mir-148a,44,65,-	12397.5	8887.6
hsa-miR-199b-5p	1466	355967	353866	11077.4	7941.29	9:hsa;hsa-mir-199b,26,48,-	11012.1	7894.42
hsa-miR-22-3p	965	319193	319193	9933.05	7120.89	17:hsa;hsa-mir-22,53,74,-	9933.05	7120.89
hsa-miR-30d-5p	1801	291555	291025	9072.98	6504.31	8:hsa;hsa-mir-30d,6,27,-	9056.5	6492.5
hsa-miR-29a-3p	1762	288366	288238	8973.74	6433.17	7:hsa;hsa-mir-29a,42,63,-	8969.77	6430.32
hsa-miR-27a-3p	2316	277401	271134	8632.52	6188.55	19:hsa;hsa-mir-27a,51,71,-	8437.51	6048.75
hsa-miR-7-5p	1222	268375	91287.5	8351.63	5987.19	9:hsa;hsa-mir-7-1,24,46,-	2840.8	2036.54
hsa-miR-7-5p	1205	266487	89399.5	8292.88	5945.07	15:hsa;hsa-mir-7-2,32,54,+	2782.05	1994.42
hsa-miR-7-5p	1172	266224	89138	8284.7	5939.2	19:hsa;hsa-mir-7-3,31,53,+	2773.91	1988.58
hsa-miR-125b-5p	1533	256946	134878	7995.97	5732.22	11:hsa;hsa-mir-125b-1,15,36,-	4197.29	3008.99
hsa-miR-125b-5p	1451	251005	128936	7811.09	5599.68	21:hsa;hsa-mir-125b-2,17,38,+	4012.41	2876.45
hsa-miR-127-3p	2260	242279	242279	7539.55	5405.01	14:hsa;hsa-mir-127,57,78,+	7539.55	5405.01
hsa-miR-24-3p	1102	212255	106847	6605.22	4735.21	9:hsa;hsa-mir-24-1,44,65,+	3325	2383.66
hsa-miR-24-3p	1026	210999	105591	6566.13	4707.19	19:hsa;hsa-mir-24-2,50,71,-	3285.91	2355.63
hsa-let-7b-5p	1780	199907	198477	6220.96	4459.74	22:hsa;hsa-let-7b,6,27,+	6176.45	4427.82
hsa-miR-103a-3p	1484	172184	85378	5358.24	3841.26	20:hsa;hsa-mir-103a-2,48,70,+	2656.9	1904.7
hsa-miR-103a-3p	1431	171216	84412.5	5328.12	3819.67	5:hsa;hsa-mir-103a-1,48,70,-	2626.86	1883.16
hsa-miR-381-3p	793	169255	169253	5267.09	3775.92	14:hsa;hsa-mir-381,49,70,+	5267.03	3775.87
hsa-miR-99b-5p	1127	148579	148579	4623.67	3314.66	19:hsa;hsa-mir-99b,7,28,+	4623.67	3314.66
hsa-miR-152-3p	1341	146285	146281	4552.28	3263.48	17:hsa;hsa-mir-152,54,74,-	4552.16	3263.39
hsa-miR-23a-3p	1337	137281	135742	4272.08	3062.61	19:hsa;hsa-mir-23a,45,65,-	4224.19	3028.27
hsa-miR-92a-3p	1763	132103	69783.8	4110.95	2947.09	13:hsa;hsa-mir-92a-1,48,69,+	2171.62	1556.81
hsa-miR-92a-3p	1756	128393	66073.8	3995.5	2864.33	X:hsa;hsa-mir-92a-2,48,69,-	2056.17	1474.04
hsa-miR-423-3p	2307	122151	122151	3801.25	2725.07	17:hsa;hsa-mir-423,53,75,+	3801.25	2725.07
hsa-miR-148b-3p	879	108960	108170	3390.76	2430.79	12:hsa;hsa-mir-148b,63,84,+	3366.16	2413.16
hsa-miR-101-3p	1365	97697	49818	3040.26	2179.53	9:hsa;hsa-mir-101-2,49,69,+	1550.3	1111.39
hsa-miR-101-3p	1337	96406	48527	3000.08	2150.73	1:hsa;hsa-mir-101-1,47,67,-	1510.12	1082.59
hsa-miR-221-5p	1151	88302	88302	2747.89	1969.93	X:hsa;hsa-mir-221,25,46,-	2747.89	1969.93
hsa-miR-218-5p	1141	79422	41141	2471.55	1771.83	4:hsa;hsa-mir-218-1,25,45,+	1280.28	917.817
hsa-miR-218-5p	1034	76770	38489	2389.03	1712.67	5:hsa;hsa-mir-218-2,25,45,-	1197.75	858.653
hsa-miR-125a-5p	850	69605	69605	2166.06	1552.82	19:hsa;hsa-mir-125a,15,38,+	2166.06	1552.82
hsa-miR-25-3p	935	69333	69331.7	2157.59	1546.75	7:hsa;hsa-mir-25,52,73,-	2157.55	1546.72
hsa-miR-99a-5p	878	66651	61125.5	2074.13	1486.92	21:hsa;hsa-mir-99a,13,34,+	1902.18	1363.65
hsa-miR-30e-5p	914	65555	65209.8	2040.02	1462.47	1:hsa;hsa-mir-30e,17,38,+	2029.28	1454.77
hsa-let-7e-5p	768	64038	63125.2	1992.82	1428.63	19:hsa;hsa-let-7e,8,29,+	1964.41	1408.26
hsa-miR-181a-5p	1240	59122	29574.8	1839.83	1318.96	1:hsa;hsa-mir-181a-1,24,46,-	920.345	659.785
hsa-miR-181a-5p	1230	59096	29548.8	1839.02	1318.38	9:hsa;hsa-mir-181a-2,39,61,+	919.535	659.205
hsa-miR-191-5p	1015	58306	58306	1814.44	1300.75	3:hsa;hsa-mir-191,16,38,-	1814.44	1300.75
hsa-miR-30c-5p	721	54948	27486.2	1709.94	1225.84	6:hsa;hsa-mir-30c-2,7,29,-	855.349	613.19
hsa-miR-30c-5p	715	54908	27446.2	1708.7	1224.95	1:hsa;hsa-mir-30c-1,17,39,+	854.105	612.298
hsa-miR-23b-3p	972	52921	51384.3	1646.86	1180.62	9:hsa;hsa-mir-23b,58,78,+	1599.04	1146.34
hsa-miR-140-3p	1436	52737	52737	1641.14	1176.51	16:hsa;hsa-mir-140,62,82,+	1641.14	1176.51
hsa-miR-26b-5p	574	52462	52458	1632.58	1170.38	2:hsa;hsa-mir-26b,12,32,+	1632.45	1170.29
hsa-miR-145-5p	614	51244	51244	1594.68	1143.2	5:hsa;hsa-mir-145,16,38,+	1594.68	1143.2
hsa-miR-455-5p	993	47874	47874	1489.8	1068.02	9:hsa;hsa-mir-455,16,37,+	1489.8	1068.02
hsa-miR-379-5p	556	45960	45960	1430.24	1025.32	14:hsa;hsa-mir-379,6,26,+	1430.24	1025.32
hsa-miR-532-5p	679	41698	41698	1297.61	930.24	X:hsa;hsa-mir-532,20,41,+	1297.61	930.243
hsa-miR-146b-5p	738	38868	38864	1209.54	867.11	10:hsa;hsa-mir-146b,9,30,+	1209.42	867.019
hsa-miR-146a-5p	927	38396	38392	1194.86	856.58	5:hsa;hsa-mir-146a,21,42,+	1194.73	856.489
hsa-miR-31-5p	806	37996	37996	1182.41	847.65	9:hsa;hsa-mir-31,8,28,-	1182.41	847.655
hsa-miR-370-3p	781	34886	34886	1085.63	778.27	14:hsa;hsa-mir-370,48,69,+	1085.63	778.274
hsa-miR-20a-5p	475	34598	34447.8	1076.66	771.85	13:hsa;hsa-mir-20a,8,30,+	1071.99	768.498
hsa-miR-151a-3p	1677	32390	32390	1007.95	722.59	8:hsa;hsa-mir-151a,47,67,-	1007.95	722.59
hsa-miR-155-5p	915	31335	31335	975.12	699.05	21:hsa;hsa-mir-155,4,26,+	975.122	699.054
hsa-miR-423-5p	584	31246	31246	972.35	697.07	17:hsa;hsa-mir-423,17,39,+	972.353	697.069
hsa-miR-34c-5p	539	31228	31225.5	971.79	696.67	11:hsa;hsa-mir-34c,13,35,+	971.715	696.611
hsa-miR-93-5p	728	29419	29419	915.5	656.31	7:hsa;hsa-mir-93,11,33,-	915.498	656.31
hsa-miR-411-5p	501	29253	29253	910.33	652.61	14:hsa;hsa-mir-411,16,36,+	910.332	652.607
hsa-miR-409-3p	1077	28280	28280	880.05	630.9	14:hsa;hsa-mir-409,47,68,+	880.053	630.9
hsa-miR-16-5p	510	25729	13024	800.67	573.99	13:hsa;hsa-mir-16-1,14,35,-	405.297	290.553
hsa-miR-16-5p	525	25559	12854	795.38	570.2	3:hsa;hsa-mir-16-2,10,31,+	400.007	286.761
hsa-miR-214-3p	896	24152	24152	751.59	538.81	1:hsa;hsa-mir-214,71,92,-	751.593	538.808
hsa-miR-224-5p	557	23858	23858	742.44	532.25	X:hsa;hsa-mir-224,8,28,-	742.444	532.249
hsa-miR-106b-3p	749	23598	23598	734.35	526.45	7:hsa;hsa-mir-106b,52,73,-	734.353	526.449
hsa-miR-128-3p	654	22732	14749.5	707.4	507.13	2:hsa;hsa-mir-128-1,50,70,+	458.994	329.047
hsa-miR-34a-5p	668	22069	22069	686.77	492.34	1:hsa;hsa-mir-34a,22,43,-	686.771	492.338
hsa-miR-654-3p	589	20608	20608	641.31	459.74	14:hsa;hsa-mir-654,51,72,+	641.306	459.745
hsa-miR-493-5p	312	20489	20489	637.6	457.09	14:hsa;hsa-mir-493,16,37,+	637.603	457.09
hsa-miR-374b-5p	420	19507	19465.5	607.04	435.18	X:hsa;hsa-mir-374b,11,32,-	605.752	434.257
hsa-miR-192-5p	766	19460	19444.5	605.58	434.13	11:hsa;hsa-mir-192,24,44,-	605.099	433.788
hsa-miR-92b-3p	1047	18356	18354.7	571.23	409.5	1:hsa;hsa-mir-92b,61,82,+	571.184	409.475
hsa-miR-21-3p	701	17381	17381	540.88	387.75	17:hsa;hsa-mir-21,46,66,+	540.884	387.754
hsa-miR-128-3p	482	16996	9013.5	528.9	379.16	3:hsa;hsa-mir-128-2,52,72,+	280.494	201.083
hsa-miR-361-3p	589	16883	16883	525.39	376.64	X:hsa;hsa-mir-361,45,67,-	525.387	376.644
hsa-miR-98-5p	345	16735	16111.1	520.78	373.34	X:hsa;hsa-mir-98,22,43,-	501.366	359.423
hsa-miR-1307-3p	873	16526	16526	514.28	368.68	10:hsa;hsa-mir-1307,80,101,-	514.277	368.679
hsa-miR-30a-3p	621	15897	15886	494.7	354.65	6:hsa;hsa-mir-30a,47,68,-	494.361	354.402
hsa-let-7d-5p	364	15379	14205.6	478.58	343.09	9:hsa;hsa-let-7d,8,29,+	442.067	316.913
hsa-miR-17-5p	434	15194	15061.8	472.83	338.96	13:hsa;hsa-mir-17,14,36,+	468.713	336.015
hsa-let-7c-5p	464	13655	10588.9	424.93	304.63	21:hsa;hsa-let-7c,11,32,+	329.518	236.228
hsa-miR-769-5p	462	13239	13239	411.99	295.35	19:hsa;hsa-mir-769,30,51,+	411.988	295.35
hsa-miR-181b-5p	811	12963	6851.08	403.4	289.19	9:hsa;hsa-mir-181b-2,16,38,+	213.201	152.841
hsa-miR-455-3p	509	12781	12781	397.74	285.13	9:hsa;hsa-mir-455,54,74,+	397.735	285.132
hsa-miR-181b-5p	793	12655	6543.08	393.81	282.32	1:hsa;hsa-mir-181b-1,36,58,-	203.616	145.97
hsa-miR-136-3p	382	12491	12491	388.71	278.66	14:hsa;hsa-mir-136,49,70,+	388.711	278.662
hsa-miR-30b-5p	297	12349	12311.7	384.29	275.49	8:hsa;hsa-mir-30b,17,38,-	383.13	274.662
hsa-miR-484	459	11692	11692	363.85	260.84	16:hsa;hsa-mir-484,8,29,+	363.846	260.837
hsa-miR-196b-5p	373	11391	11381.7	354.48	254.12	7:hsa;hsa-mir-196b,15,36,-	354.189	253.914
hsa-miR-4485-3p	500	11295	11295	351.49	251.98	11:hsa;hsa-mir-4485,31,50,-	351.492	251.981
hsa-miR-125b-1-3p	619	11204	11204	348.66	249.95	11:hsa;hsa-mir-125b-1,55,76,-	348.66	249.951
hsa-miR-107	546	11091	5649.5	345.14	247.43	10:hsa;hsa-mir-107,50,72,-	175.808	126.035
hsa-miR-186-5p	447	11084	11084	344.93	247.27	1:hsa;hsa-mir-186,15,36,-	344.926	247.274
hsa-miR-494-3p	260	10587	10587	329.46	236.19	14:hsa;hsa-mir-494,48,69,+	329.46	236.186
hsa-miR-425-5p	462	9861	9861	306.87	219.99	3:hsa;hsa-mir-425,14,36,-	306.867	219.99
hsa-miR-99b-3p	619	9431	9431	293.49	210.4	19:hsa;hsa-mir-99b,45,66,+	293.486	210.397
hsa-miR-889-3p	270	9377	9377	291.81	209.19	14:hsa;hsa-mir-889,49,69,+	291.805	209.192
hsa-miR-30e-3p	385	8880	8871	276.34	198.1	1:hsa;hsa-mir-30e,59,80,+	276.059	197.904
hsa-miR-503-5p	553	8863	8863	275.81	197.73	X:hsa;hsa-mir-503,6,28,-	275.81	197.725
hsa-miR-127-5p	468	8760	8760	272.6	195.43	14:hsa;hsa-mir-127,23,44,+	272.605	195.427
hsa-miR-134-5p	525	8139	8139	253.28	181.57	14:hsa;hsa-mir-134,8,29,+	253.28	181.573
hsa-miR-29b-3p	273	8097	4044.33	251.97	180.64	1:hsa;hsa-mir-29b-2,52,74,-	125.857	90.2252
hsa-miR-29b-3p	273	8083	4030.33	251.54	180.32	7:hsa;hsa-mir-29b-1,51,73,-	125.421	89.9129
hsa-miR-744-5p	281	8073	8073	251.23	180.1	17:hsa;hsa-mir-744,11,32,+	251.226	180.101
hsa-miR-382-3p	271	7849	7849	244.26	175.1	14:hsa;hsa-mir-382,47,67,+	244.255	175.104
hsa-miR-138-5p	477	7763	5796.5	241.58	173.19	3:hsa;hsa-mir-138-1,23,45,+	180.383	129.314
hsa-miR-660-5p	199	7651	7651	238.09	170.69	X:hsa;hsa-mir-660,16,37,+	238.094	170.687
hsa-miR-24-2-5p	322	7622	7618	237.19	170.04	19:hsa;hsa-mir-24-2,13,34,-	237.067	169.95
hsa-miR-452-5p	363	7599	7599	236.48	169.53	X:hsa;hsa-mir-452,14,35,-	236.475	169.526
hsa-miR-365b-3p	254	7544	3773.5	234.76	168.3	17:hsa;hsa-mir-365b,68,89,+	117.429	84.1832
hsa-miR-365a-3p	254	7543	3772.5	234.73	168.28	16:hsa;hsa-mir-365a,56,77,+	117.397	84.1609
hsa-miR-450b-5p	175	6973	6973	216.99	155.56	X:hsa;hsa-mir-450b,11,32,-	216.995	155.561
hsa-miR-424-3p	306	6795	6795	211.46	151.59	X:hsa;hsa-mir-424,48,68,-	211.455	151.59
hsa-miR-374a-5p	206	6678	6665.5	207.81	148.98	X:hsa;hsa-mir-374a,12,33,-	207.425	148.701
hsa-miR-193a-5p	354	6661	6661	207.29	148.6	17:hsa;hsa-mir-193a,21,42,+	207.285	148.601
hsa-miR-409-5p	259	6451	6451	200.75	143.92	14:hsa;hsa-mir-409,15,37,+	200.75	143.916
hsa-miR-181a-3p	236	6311	6299	196.39	140.79	1:hsa;hsa-mir-181a-1,64,85,-	196.02	140.525
hsa-miR-450a-5p	197	6114	3070.5	190.26	136.4	X:hsa;hsa-mir-450a-2,23,44,-	95.5517	68.4999
hsa-miR-450a-5p	194	6101	3057.5	189.86	136.11	X:hsa;hsa-mir-450a-1,18,39,-	95.1472	68.2099
hsa-miR-145-3p	293	6094	6094	189.64	135.95	5:hsa;hsa-mir-145,54,75,+	189.641	135.951
hsa-miR-214-5p	227	6080	6080	189.21	135.64	1:hsa;hsa-mir-214,30,51,-	189.205	135.639
hsa-miR-143-5p	322	6069	6069	188.86	135.39	5:hsa;hsa-mir-143,27,48,+	188.863	135.394
hsa-miR-654-5p	326	6045	6045	188.12	134.86	14:hsa;hsa-mir-654,16,37,+	188.116	134.858
hsa-miR-542-3p	368	6030	6030	187.65	134.52	X:hsa;hsa-mir-542,53,74,-	187.649	134.524
hsa-miR-10b-5p	256	5987	5974	186.31	133.56	2:hsa;hsa-mir-10b,27,49,+	185.907	133.274
hsa-miR-323a-3p	243	5851	5847	182.08	130.53	14:hsa;hsa-mir-323a,51,71,+	181.954	130.441
hsa-miR-382-5p	343	5822	5822	181.18	129.88	14:hsa;hsa-mir-382,11,32,+	181.176	129.883
hsa-miR-320a	944	4928	4780.97	153.36	109.94	8:hsa;hsa-mir-320a,48,69,-	148.78	106.659
hsa-miR-424-5p	206	4851	4851	150.96	108.22	X:hsa;hsa-mir-424,11,32,-	150.96	108.221
hsa-miR-138-5p	356	4845	2878.5	150.77	108.09	16:hsa;hsa-mir-138-2,10,32,+	89.5768	64.2166
hsa-miR-106b-5p	244	4833	4833	150.4	107.82	7:hsa;hsa-mir-106b,12,32,-	150.399	107.82
hsa-let-7a-3p	235	4814	2458	149.81	107.4	9:hsa;hsa-let-7a-1,57,77,+	76.4912	54.8356
hsa-miR-500a-3p	316	4775	4127.5	148.59	106.53	X:hsa;hsa-mir-500a,52,73,+	128.445	92.0806
hsa-let-7a-3p	204	4712	2356	146.63	105.12	22:hsa;hsa-let-7a-3,52,72,+	73.317	52.5601
hsa-miR-130b-5p	132	4614	4614	143.58	102.93	22:hsa;hsa-mir-130b,13,33,+	143.584	102.934
hsa-miR-193b-3p	413	4579	4578.5	142.5	102.15	16:hsa;hsa-mir-193b,51,72,+	142.48	102.142
hsa-miR-629-5p	194	4475	4475	139.26	99.83	15:hsa;hsa-mir-629,22,42,-	139.259	99.833
hsa-miR-3615	368	4362	4362	135.74	97.31	17:hsa;hsa-mir-3615,51,71,+	135.742	97.3121
hsa-miR-19b-3p	192	4289	2170	133.47	95.68	X:hsa;hsa-mir-19b-2,62,84,-	67.5288	48.4106
hsa-miR-32-5p	135	4264	4264	132.69	95.13	9:hsa;hsa-mir-32,6,27,-	132.693	95.1258
hsa-miR-19b-3p	187	4253	2134	132.35	94.88	13:hsa;hsa-mir-19b-1,54,76,+	66.4085	47.6075
hsa-miR-181a-2-3p	188	4232	4232	131.7	94.41	9:hsa;hsa-mir-181a-2,77,98,+	131.697	94.4119
hsa-miR-16-2-3p	234	4171	4171	129.8	93.05	3:hsa;hsa-mir-16-2,53,74,+	129.798	93.051
hsa-miR-181d-5p	376	4171	4168.33	129.8	93.05	19:hsa;hsa-mir-181d,36,58,+	129.715	92.9916
hsa-miR-140-5p	156	4161	4161	129.49	92.83	16:hsa;hsa-mir-140,23,44,+	129.487	92.828
hsa-miR-4521	483	4008	4008	124.73	89.41	17:hsa;hsa-mir-4521,4,25,+	124.726	89.4147
hsa-miR-15b-5p	143	4006	4005.5	124.66	89.37	3:hsa;hsa-mir-15b,20,41,+	124.648	89.3589
hsa-miR-210-3p	455	3958	3958	123.17	88.3	11:hsa;hsa-mir-210,66,87,-	123.17	88.2992
hsa-miR-126-3p	199	3799	3799	118.22	84.75	9:hsa;hsa-mir-126,52,73,+	118.222	84.7521
hsa-miR-625-3p	398	3757	3757	116.92	83.82	14:hsa;hsa-mir-625,52,73,+	116.915	83.8151
hsa-miR-543	221	3599	3599	112	80.29	14:hsa;hsa-mir-543,47,68,+	111.998	80.2903
hsa-miR-495-3p	231	3313	3313	103.1	73.91	14:hsa;hsa-mir-495,50,71,+	103.098	73.9099
hsa-miR-369-3p	109	3068	3068	95.47	68.44	14:hsa;hsa-mir-369,44,64,+	95.4739	68.4442
hsa-miR-132-3p	213	2912	2912	90.62	64.96	17:hsa;hsa-mir-132,59,80,-	90.6193	64.964
hsa-miR-758-3p	134	2892	2892	90	64.52	14:hsa;hsa-mir-758,52,73,+	89.9969	64.5178
hsa-miR-486-5p	234	2850	1566	88.69	63.58	8:hsa;hsa-mir-486-2,1,22,+	48.7328	34.936
hsa-miR-1185-1-3p	171	2828	2654.5	88.01	63.09	14:hsa;hsa-mir-1185-1,53,74,+	82.6061	59.2194
hsa-miR-196a-5p	168	2825	1697.17	87.91	63.02	12:hsa;hsa-mir-196a-2,25,46,+	52.8146	37.8622
hsa-miR-30c-2-3p	162	2811	2810.5	87.48	62.71	6:hsa;hsa-mir-30c-2,47,68,-	87.4607	62.6996
hsa-miR-486-5p	248	2775	1491	86.36	61.91	8:hsa;hsa-mir-486-1,4,25,-	46.3988	33.2628
hsa-miR-342-3p	204	2762	2762	85.95	61.62	14:hsa;hsa-mir-342,61,83,+	85.9514	61.6176
hsa-miR-3117-3p	282	2741	2741	85.3	61.15	1:hsa;hsa-mir-3117,46,66,+	85.2979	61.1491
hsa-miR-125b-2-3p	253	2724	2724	84.77	60.77	21:hsa;hsa-mir-125b-2,54,75,+	84.7689	60.7699
hsa-miR-215-5p	132	2638	2622.5	82.09	58.85	1:hsa;hsa-mir-215,27,47,-	81.6103	58.5055
hsa-miR-22-5p	138	2602	2602	80.97	58.05	17:hsa;hsa-mir-22,15,36,-	80.9723	58.0481
hsa-let-7d-3p	169	2585	2585	80.44	57.67	9:hsa;hsa-let-7d,62,83,+	80.4433	57.6689
hsa-miR-331-3p	168	2527	2527	78.64	56.37	12:hsa;hsa-mir-331,61,81,+	78.6384	56.375
hsa-miR-149-5p	176	2490	2490	77.49	55.55	2:hsa;hsa-mir-149,15,37,+	77.487	55.5495
hsa-miR-130a-3p	181	2474	2473.5	76.99	55.19	11:hsa;hsa-mir-130a,55,76,+	76.9735	55.1814
hsa-miR-454-3p	191	2438	2438	75.87	54.39	17:hsa;hsa-mir-454,64,86,-	75.8688	54.3895
hsa-miR-31-3p	145	2386	2386	74.25	53.23	9:hsa;hsa-mir-31,44,65,-	74.2506	53.2294
hsa-miR-196a-5p	138	2309	1182.17	71.85	51.51	17:hsa;hsa-mir-196a-1,7,28,-	36.7882	26.373
hsa-miR-502-3p	188	2246	1601.5	69.89	50.11	X:hsa;hsa-mir-502,52,73,+	49.8375	35.7279
hsa-miR-345-5p	185	2240	2240	69.71	49.97	14:hsa;hsa-mir-345,18,39,+	69.7072	49.9723
hsa-miR-411-3p	110	2225	2224.5	69.24	49.64	14:hsa;hsa-mir-411,51,72,+	69.2248	49.6265
hsa-miR-339-3p	212	2221	2221	69.12	49.55	7:hsa;hsa-mir-339,50,72,-	69.1159	49.5484
hsa-miR-1307-5p	174	2127	2127	66.19	47.45	10:hsa;hsa-mir-1307,41,61,-	66.1907	47.4513
hsa-miR-181c-3p	146	2110	2098	65.66	47.07	19:hsa;hsa-mir-181c,65,86,+	65.2882	46.8044
hsa-miR-330-3p	226	1986	1986	61.8	44.31	19:hsa;hsa-mir-330,57,79,-	61.8029	44.3058
hsa-miR-487b-3p	200	1975	1975	61.46	44.06	14:hsa;hsa-mir-487b,51,72,+	61.4606	44.0604
hsa-miR-299-3p	189	1918	1918	59.69	42.79	14:hsa;hsa-mir-299,39,60,+	59.6868	42.7888
hsa-miR-194-5p	120	1910	1371	59.44	42.61	1:hsa;hsa-mir-194-1,15,36,-	42.6645	30.5857
hsa-miR-490-3p	178	1875	1875	58.35	41.83	7:hsa;hsa-mir-490,76,97,+	58.3486	41.8295
hsa-miR-5100	20	1874	1874	58.32	41.81	10:hsa;hsa-mir-5100,68,89,+	58.3175	41.8072
hsa-miR-136-5p	124	1862	1862	57.94	41.54	14:hsa;hsa-mir-136,15,37,+	57.9441	41.5395
hsa-miR-1296-5p	199	1795	1795	55.86	40.04	10:hsa;hsa-mir-1296,16,37,-	55.8591	40.0447
hsa-miR-1180-3p	159	1761	1761	54.8	39.29	17:hsa;hsa-mir-1180,41,62,-	54.801	39.2862
hsa-miR-323b-3p	79	1745	1741	54.3	38.93	14:hsa;hsa-mir-323b,51,72,+	54.1786	38.8401
hsa-miR-129-5p	158	1738	879.5	54.09	38.77	11:hsa;hsa-mir-129-2,15,35,+	27.3694	19.6208
hsa-miR-129-5p	152	1726	867.5	53.71	38.51	7:hsa;hsa-mir-129-1,5,25,+	26.996	19.3531
hsa-miR-501-3p	126	1713	1703.5	53.31	38.22	X:hsa;hsa-mir-501,51,72,+	53.0117	38.0035
hsa-miR-432-5p	211	1705	1705	53.06	38.04	14:hsa;hsa-mir-432,14,36,+	53.0584	38.0369
hsa-miR-485-3p	152	1694	1694	52.72	37.79	14:hsa;hsa-mir-485,46,67,+	52.716	37.7915
hsa-miR-410-3p	83	1674	1674	52.09	37.35	14:hsa;hsa-mir-410,50,70,+	52.0937	37.3453
hsa-let-7b-3p	130	1626	1624.5	50.6	36.27	22:hsa;hsa-let-7b,60,81,+	50.5533	36.2411
hsa-miR-7974	95	1622	1622	50.48	36.19	19:hsa;hsa-mir-7974,56,79,-	50.4755	36.1853
hsa-miR-15b-3p	124	1609	1609	50.07	35.9	3:hsa;hsa-mir-15b,58,79,+	50.0709	35.8953
hsa-miR-505-3p	170	1572	1572	48.92	35.07	X:hsa;hsa-mir-505,51,72,-	48.9195	35.0698
hsa-miR-589-5p	113	1555	1555	48.39	34.69	7:hsa;hsa-mir-589,24,45,-	48.3905	34.6906
hsa-miR-671-3p	170	1547	1547	48.14	34.51	7:hsa;hsa-mir-671,68,88,+	48.1415	34.5121
hsa-miR-425-3p	241	1531	1531	47.64	34.16	3:hsa;hsa-mir-425,55,76,-	47.6436	34.1552
hsa-let-7i-3p	93	1504	1504	46.8	33.55	12:hsa;hsa-let-7i,62,83,+	46.8034	33.5528
hsa-miR-329-3p	180	1485	742.5	46.21	33.13	14:hsa;hsa-mir-329-1,50,71,+	23.1061	16.5645
hsa-miR-329-3p	180	1485	742.5	46.21	33.13	14:hsa;hsa-mir-329-2,52,73,+	23.1061	16.5645
hsa-miR-182-5p	131	1484	1484	46.18	33.11	7:hsa;hsa-mir-182,23,46,-	46.181	33.1066
hsa-miR-194-5p	113	1481	942	46.09	33.04	11:hsa;hsa-mir-194-2,15,36,-	29.3144	21.0151
hsa-miR-1304-3p	54	1439	1439	44.78	32.1	11:hsa;hsa-mir-1304,53,74,-	44.7806	32.1027
hsa-miR-19a-3p	149	1412	1410	43.94	31.5	13:hsa;hsa-mir-19a,49,71,+	43.8782	31.4558
hsa-miR-132-5p	115	1348	1348	41.95	30.07	17:hsa;hsa-mir-132,23,44,-	41.9488	30.0726
hsa-miR-369-5p	78	1319	1319	41.05	29.43	14:hsa;hsa-mir-369,9,30,+	41.0463	29.4256
hsa-miR-7977	11	1301	1301	40.49	29.02	3:hsa;hsa-mir-7977,1,18,+	40.4862	29.0241
hsa-miR-362-5p	101	1227	1227	38.18	27.37	X:hsa;hsa-mir-362,5,28,+	38.1833	27.3732
hsa-miR-7706	145	1199	1199	37.31	26.75	15:hsa;hsa-mir-7706,44,67,+	37.312	26.7486
hsa-miR-377-3p	85	1173	1173	36.5	26.17	14:hsa;hsa-mir-377,45,66,+	36.5029	26.1685
hsa-miR-598-3p	121	1149	1149	35.76	25.63	8:hsa;hsa-mir-598,61,82,-	35.756	25.6331
hsa-miR-376c-3p	120	1148	1147.33	35.72	25.61	14:hsa;hsa-mir-376c,43,63,+	35.7042	25.5959
hsa-miR-539-3p	98	1091	1091	33.95	24.34	14:hsa;hsa-mir-539,49,70,+	33.9511	24.3392
hsa-miR-1287-5p	94	1088	1088	33.86	24.27	10:hsa;hsa-mir-1287,16,37,-	33.8578	24.2722
hsa-miR-148b-5p	99	1047	1047	32.58	23.36	12:hsa;hsa-mir-148b,25,46,+	32.5819	23.3576
hsa-let-7f-2-3p	68	1027	1027	31.96	22.91	X:hsa;hsa-let-7f-2,58,79,-	31.9595	22.9114
hsa-miR-1278	73	994	994	30.93	22.18	1:hsa;hsa-mir-1278,50,71,+	30.9326	22.1752
hsa-miR-656-3p	65	976	976	30.37	21.77	14:hsa;hsa-mir-656,43,63,+	30.3724	21.7736
hsa-miR-615-3p	100	966	966	30.06	21.55	12:hsa;hsa-mir-615,61,82,+	30.0612	21.5505
hsa-miR-196a-3p	57	950	950	29.56	21.19	12:hsa;hsa-mir-196a-2,62,83,+	29.5633	21.1936
hsa-miR-296-3p	153	949	949	29.53	21.17	20:hsa;hsa-mir-296,48,69,-	29.5322	21.1713
hsa-miR-549a	108	940	940	29.25	20.97	15:hsa;hsa-mir-549a,61,81,-	29.2521	20.9705
hsa-miR-4677-3p	51	916	916	28.51	20.44	1:hsa;hsa-mir-4677,50,71,+	28.5053	20.4351
hsa-miR-1185-2-3p	106	885	711.5	27.54	19.74	14:hsa;hsa-mir-1185-2,53,74,+	22.1414	15.8729
hsa-miR-376a-3p	69	878	438.67	27.32	19.59	14:hsa;hsa-mir-376a-1,44,64,+	13.651	9.78624
hsa-miR-376a-3p	69	878	438.67	27.32	19.59	14:hsa;hsa-mir-376a-2,50,70,+	13.651	9.78624
hsa-miR-433-3p	101	867	867	26.98	19.34	14:hsa;hsa-mir-433,64,85,+	26.9804	19.3419
hsa-miR-148a-5p	82	858	858	26.7	19.14	7:hsa;hsa-mir-148a,6,27,-	26.7003	19.1412
hsa-miR-651-5p	71	852	852	26.51	19.01	X:hsa;hsa-mir-651,16,37,+	26.5136	19.0073
hsa-miR-10a-5p	97	847	828	26.36	18.9	17:hsa;hsa-mir-10a,22,44,-	25.7668	18.4719
hsa-miR-655-3p	80	833	833	25.92	18.58	14:hsa;hsa-mir-655,61,82,+	25.9224	18.5834
hsa-miR-299-5p	76	832	832	25.89	18.56	14:hsa;hsa-mir-299,7,28,+	25.8912	18.5611
hsa-miR-3158-3p	80	830	415.5	25.83	18.52	10:hsa;hsa-mir-3158-1,50,71,+	12.9301	9.26941
hsa-miR-3158-3p	79	829	414.5	25.8	18.49	10:hsa;hsa-mir-3158-2,50,71,-	12.8989	9.2471
hsa-miR-532-3p	69	829	829	25.8	18.49	X:hsa;hsa-mir-532,57,78,+	25.7979	18.4942
hsa-miR-15a-5p	87	819	818.5	25.49	18.27	13:hsa;hsa-mir-15a,14,35,-	25.4711	18.26
hsa-miR-431-5p	65	818	818	25.46	18.25	14:hsa;hsa-mir-431,20,40,+	25.4556	18.2488
hsa-miR-379-3p	53	772	771.5	24.02	17.22	14:hsa;hsa-mir-379,44,65,+	24.0085	17.2114
hsa-miR-652-3p	85	768	768	23.9	17.13	X:hsa;hsa-mir-652,61,81,+	23.8996	17.1334
hsa-miR-431-3p	179	766	766	23.84	17.09	14:hsa;hsa-mir-431,63,84,+	23.8374	17.0887
hsa-miR-1-3p	53	757	409	23.56	16.89	18:hsa;hsa-mir-1-2,53,74,-	12.7278	9.1244
hsa-miR-664a-3p	65	750	750	23.34	16.73	1:hsa;hsa-mir-664a,49,71,-	23.3395	16.7318
hsa-miR-337-3p	69	746	746	23.21	16.64	14:hsa;hsa-mir-337,61,82,+	23.215	16.6426
hsa-miR-671-5p	129	718	718	22.34	16.02	7:hsa;hsa-mir-671,29,51,+	22.3436	16.0179
hsa-miR-1-3p	49	714	366	22.22	15.93	20:hsa;hsa-mir-1-1,46,67,+	11.3897	8.16511
hsa-miR-29c-3p	113	705	650	21.94	15.73	1:hsa;hsa-mir-29c,54,75,-	20.2275	14.5009
hsa-miR-185-3p	77	681	681	21.19	15.19	22:hsa;hsa-mir-185,50,71,+	21.1922	15.1925
hsa-miR-582-3p	60	653	653	20.32	14.57	5:hsa;hsa-mir-582,53,74,-	20.3209	14.5678
hsa-miR-485-5p	73	637	637	19.82	14.21	14:hsa;hsa-mir-485,9,30,+	19.823	14.2109
hsa-miR-877-5p	136	636	636	19.79	14.19	6:hsa;hsa-mir-877,1,20,+	19.7919	14.1886
hsa-miR-183-5p	76	630	630	19.61	14.05	7:hsa;hsa-mir-183,27,48,-	19.6051	14.0547
hsa-miR-146b-3p	84	629	629	19.57	14.03	10:hsa;hsa-mir-146b,45,66,+	19.574	14.0324
hsa-miR-27a-5p	77	620	620	19.29	13.83	19:hsa;hsa-mir-27a,10,31,-	19.2939	13.8316
hsa-miR-3909	75	610	610	18.98	13.61	22:hsa;hsa-mir-3909,71,92,+	18.9828	13.6085
hsa-miR-941	225	606	35.65	18.86	13.52	20:hsa;hsa-mir-941-5,47,69,+	1.10931	0.795252
hsa-miR-941	225	606	35.65	18.86	13.52	20:hsa;hsa-mir-941-3,47,69,+	1.10931	0.795252
hsa-miR-941	225	606	35.65	18.86	13.52	20:hsa;hsa-mir-941-2,47,69,+	1.10931	0.795252
hsa-miR-941	225	606	35.65	18.86	13.52	20:hsa;hsa-mir-941-2,47,69,+	1.10931	0.795252
hsa-miR-941	225	606	35.65	18.86	13.52	20:hsa;hsa-mir-941-5,47,69,+	1.10931	0.795252
hsa-miR-941	225	606	35.65	18.86	13.52	20:hsa;hsa-mir-941-2,47,69,+	1.10931	0.795252
hsa-miR-941	225	606	35.65	18.86	13.52	20:hsa;hsa-mir-941-1,47,69,+	1.10931	0.795252
hsa-miR-941	225	606	35.65	18.86	13.52	20:hsa;hsa-mir-941-3,47,69,+	1.10931	0.795252
hsa-miR-941	225	606	35.65	18.86	13.52	20:hsa;hsa-mir-941-3,47,69,+	1.10931	0.795252
hsa-miR-941	225	606	35.65	18.86	13.52	20:hsa;hsa-mir-941-4,47,69,+	1.10931	0.795252
hsa-miR-941	225	606	35.65	18.86	13.52	20:hsa;hsa-mir-941-3,47,69,+	1.10931	0.795252
hsa-miR-941	225	606	35.65	18.86	13.52	20:hsa;hsa-mir-941-4,47,69,+	1.10931	0.795252
hsa-miR-941	225	606	35.65	18.86	13.52	20:hsa;hsa-mir-941-5,47,69,+	1.10931	0.795252
hsa-miR-941	225	606	35.65	18.86	13.52	20:hsa;hsa-mir-941-2,47,69,+	1.10931	0.795252
hsa-miR-941	225	606	35.65	18.86	13.52	20:hsa;hsa-mir-941-4,47,69,+	1.10931	0.795252
hsa-miR-941	225	606	35.65	18.86	13.52	20:hsa;hsa-mir-941-4,47,69,+	1.10931	0.795252
hsa-miR-941	225	606	35.65	18.86	13.52	20:hsa;hsa-mir-941-5,47,69,+	1.10931	0.795252
hsa-miR-27b-5p	79	601	601	18.7	13.41	9:hsa;hsa-mir-27b,19,40,+	18.7027	13.4077
hsa-miR-2277-5p	84	595	595	18.52	13.27	5:hsa;hsa-mir-2277,18,41,-	18.516	13.2739
hsa-miR-330-5p	66	594	594	18.48	13.25	19:hsa;hsa-mir-330,18,39,-	18.4848	13.2516
hsa-miR-152-5p	57	584	584	18.17	13.03	17:hsa;hsa-mir-152,16,38,-	18.1737	13.0285
hsa-miR-9-5p	79	574	192	17.86	12.81	5:hsa;hsa-mir-9-2,16,38,-	5.9749	4.28334
hsa-miR-340-3p	63	573	573	17.83	12.78	5:hsa;hsa-mir-340,58,79,-	17.8313	12.7831
hsa-miR-9-5p	78	573	191	17.83	12.78	15:hsa;hsa-mir-9-3,16,38,+	5.94378	4.26103
hsa-miR-9-5p	78	573	191	17.83	12.78	1:hsa;hsa-mir-9-1,16,38,-	5.94378	4.26103
hsa-miR-125a-3p	81	568	568	17.68	12.67	19:hsa;hsa-mir-125a,53,74,+	17.6757	12.6715
hsa-miR-130b-3p	92	565	564.5	17.58	12.6	22:hsa;hsa-mir-130b,51,72,+	17.5668	12.5935
hsa-miR-185-5p	199	537	537	16.71	11.98	22:hsa;hsa-mir-185,15,36,+	16.711	11.98
hsa-miR-92b-5p	95	537	537	16.71	11.98	1:hsa;hsa-mir-92b,20,41,+	16.711	11.98
hsa-miR-1301-3p	95	526	526	16.37	11.73	2:hsa;hsa-mir-1301,48,71,-	16.3687	11.7346
hsa-miR-30d-3p	86	517	515	16.09	11.53	8:hsa;hsa-mir-30d,46,67,-	16.0264	11.4892
hsa-miR-421	101	516	516	16.06	11.51	X:hsa;hsa-mir-421,48,70,-	16.0575	11.5115
hsa-miR-340-5p	129	515	515	16.03	11.49	5:hsa;hsa-mir-340,16,37,-	16.0264	11.4892
hsa-miR-193a-3p	66	503	502.5	15.65	11.22	17:hsa;hsa-mir-193a,55,76,+	15.6374	11.2103
hsa-miR-18a-5p	57	502	498.5	15.62	11.2	13:hsa;hsa-mir-18a,6,28,+	15.513	11.1211
hsa-miR-874-3p	65	498	498	15.5	11.11	5:hsa;hsa-mir-874,47,68,-	15.4974	11.1099
hsa-miR-493-3p	171	493	493	15.34	11	14:hsa;hsa-mir-493,57,78,+	15.3418	10.9984
hsa-miR-1197	36	483	483	15.03	10.78	14:hsa;hsa-mir-1197,57,77,+	15.0306	10.7753
hsa-miR-93-3p	109	479	479	14.91	10.69	7:hsa;hsa-mir-93,50,71,-	14.9061	10.686
hsa-miR-3607-3p	96	470	470	14.63	10.49	5:hsa;hsa-mir-3607,51,70,+	14.6261	10.4853
hsa-miR-154-3p	48	459	459	14.28	10.24	14:hsa;hsa-mir-154,51,72,+	14.2837	10.2399
hsa-miR-193b-5p	81	445	445	13.85	9.93	16:hsa;hsa-mir-193b,14,35,+	13.8481	9.92753
hsa-miR-4473	62	435	435	13.54	9.7	9:hsa;hsa-mir-4473,57,78,-	13.5369	9.70444
hsa-miR-7-1-3p	56	427	427	13.29	9.53	9:hsa;hsa-mir-7-1,66,87,-	13.2879	9.52596
hsa-miR-324-5p	65	425	425	13.23	9.48	17:hsa;hsa-mir-324,16,38,-	13.2257	9.48135
hsa-miR-200b-3p	65	422	422	13.13	9.41	1:hsa;hsa-mir-200b,57,78,+	13.1323	9.41442
hsa-miR-204-5p	49	421	420.5	13.1	9.39	9:hsa;hsa-mir-204,33,54,-	13.0857	9.38096
hsa-miR-337-5p	53	420	420	13.07	9.37	14:hsa;hsa-mir-337,23,43,+	13.0701	9.3698
hsa-miR-212-5p	55	419	419	13.04	9.35	17:hsa;hsa-mir-212,31,53,-	13.039	9.34749
hsa-miR-365a-5p	76	414	414	12.88	9.24	16:hsa;hsa-mir-365a,16,38,+	12.8834	9.23595
[truncated: 1,146 more rows]

## Sheet: 8hpi-hsv1
Table S2: Human (hsa-) and herpes simplex virus 1 (hsv1-) mature miRNAs detected in mock samples, and at 8 h.p.i., and 18 h.p.i.
[truncated: 32 more rows]

[truncated: 3 more sheets: 18hpi-all, 18hpi-hsa, 18hpi-hsv1]
