# Supplementary material for: The Virus-induced Upregulation of the miR-183/96/182 Cluster and the FoxO Family Protein Members are not Required for the Efficient Replication of HSV-1
Source: Preprints.org preprint supplement (doi:10.20944/preprints202205.0363.v1), 2022-05-26
Supplement: Supplementary file 7 [file Table S3.xlsx]

## Sheet: mock-all
Table S3: Human (hsa-) and herpes simplex virus 1 (hsv1-) mature miRNAs detected in mock samples, and at 10 h.p.i., and 24 h.p.i.
HFF mock - all miRNAs
name	unique reads	read count	read count (mult. map. adj.)	RPM (lib)	RPM (total)	coordinateString	RPM_adj (lib)	RPM_adj (total)
hsa-miR-22-3p	359	1155457	1155457	138503	125823	17:hsa;hsa-mir-22,1713955,1713976,-	138503	125823
hsa-miR-27b-3p	834	793627	792337	95131.1	86421.6	9:hsa;hsa-mir-27b,95085505,95085525,+	94976.5	86281.1
hsa-miR-21-5p	690	772506	772506	92599.4	84121.6	17:hsa;hsa-mir-21,59841273,59841294,+	92599.4	84121.6
hsa-miR-143-3p	875	629076	629076	75406.6	68502.9	5:hsa;hsa-mir-143,149428978,149428998,+	75406.6	68502.9
hsa-miR-26a-5p	604	610520	305428	73182.3	66482.2	12:hsa;hsa-mir-26a-2,57824622,57824643,-	36611.3	33259.4
hsa-miR-26a-5p	576	610234	305142	73148	66451.1	3:hsa;hsa-mir-26a-1,37969413,37969434,+	36577	33228.3
hsa-let-7a-5p	430	392602	131548	47060.7	42752.2	22:hsa;hsa-let-7a-3,46112752,46112773,+	15768.5	14324.9
hsa-let-7a-5p	433	392019	130952	46990.8	42688.7	11:hsa;hsa-let-7a-2,122146526,122146547,-	15697	14259.9
hsa-let-7a-5p	421	391570	130504	46937	42639.8	9:hsa;hsa-let-7a-1,94175962,94175983,+	15643.4	14211.2
hsa-miR-127-3p	1302	376946	376946	45184.1	41047.3	14:hsa;hsa-mir-127,100883035,100883056,+	45184.1	41047.3
hsa-miR-181a-5p	487	363423	181712	43563.1	39574.8	1:hsa;hsa-mir-181a-1,198859067,198859089,-	21781.7	19787.5
hsa-miR-181a-5p	486	363421	181710	43562.8	39574.5	9:hsa;hsa-mir-181a-2,124692480,124692502,+	21781.4	19787.3
hsa-let-7f-5p	382	325410	169160	39006.5	35435.3	X:hsa;hsa-let-7f-2,53557199,53557220,-	20277.1	18420.6
hsa-let-7f-5p	313	313486	157239	37577.2	34136.9	9:hsa;hsa-let-7f-1,94176353,94176374,+	18848.1	17122.5
hsa-miR-199a-3p	939	288164	97778.7	34541.9	31379.5	1:hsa;hsa-mir-199a-2,172144604,172144625,-	11720.6	10647.6
hsa-miR-199b-3p	843	285706	95260.2	34247.2	31111.8	9:hsa;hsa-mir-199b,128244785,128244806,-	11418.7	10373.3
hsa-miR-199a-3p	833	285690	95250.2	34245.3	31110	19:hsa;hsa-mir-199a-1,10817472,10817493,-	11417.5	10372.2
hsa-miR-191-5p	287	207997	207997	24932.3	22649.7	3:hsa;hsa-mir-191,49020633,49020655,-	24932.3	22649.7
hsa-let-7i-5p	332	174344	174150	20898.4	18985.1	12:hsa;hsa-let-7i,62603691,62603712,+	20875.2	18964
hsa-miR-222-3p	460	126805	126805	15200	13808.4	X:hsa;hsa-mir-222,45747083,45747103,-	15200	13808.4
hsa-miR-30a-5p	462	117874	117848	14129.4	12835.8	6:hsa;hsa-mir-30a,71403556,71403577,-	14126.4	12833
hsa-miR-16-5p	186	113837	56979.7	13645.5	12396.2	3:hsa;hsa-mir-16-2,160404754,160404775,+	6830.08	6204.77
hsa-miR-16-5p	184	113766	56908.7	13637	12388.5	13:hsa;hsa-mir-16-1,50048986,50049007,-	6821.57	6197.04
hsa-miR-100-5p	346	99858	99780	11969.9	10874	11:hsa;hsa-mir-100,122152241,122152262,-	11960.5	10865.5
hsa-miR-92a-3p	682	98210	52830.3	11772.3	10694.5	13:hsa;hsa-mir-92a-1,91351361,91351382,+	6332.71	5752.93
hsa-miR-92a-3p	576	91333	45953.3	10948	9945.66	X:hsa;hsa-mir-92a-2,134169585,134169606,-	5508.37	5004.06
hsa-miR-151a-3p	596	86790	86790	10403.4	9450.95	8:hsa;hsa-mir-151a,140732610,140732630,-	10403.4	9450.95
hsa-miR-221-3p	440	66944	66944	8024.5	7289.83	X:hsa;hsa-mir-221,45746221,45746243,-	8024.5	7289.83
hsa-miR-29a-3p	420	66844	66841.8	8012.51	7278.94	7:hsa;hsa-mir-29a,130876788,130876809,-	8012.25	7278.7
hsa-miR-411-5p	218	61107	61107	7324.82	6654.21	14:hsa;hsa-mir-411,101023340,101023360,+	7324.82	6654.21
hsa-miR-27a-3p	377	57881	56676.7	6938.13	6302.92	19:hsa;hsa-mir-27a,13836490,13836510,-	6793.76	6171.77
hsa-miR-125b-5p	286	54685	27452	6555.02	5954.89	11:hsa;hsa-mir-125b-1,122099771,122099792,-	3290.64	2989.37
hsa-miR-125b-5p	274	54599	27366	6544.72	5945.53	21:hsa;hsa-mir-125b-2,16590253,16590274,+	3280.33	2980.01
hsa-miR-151a-5p	107	53987	53349	6471.36	5878.88	8:hsa;hsa-mir-151a,140732574,140732594,-	6394.88	5809.41
hsa-let-7b-5p	458	51764	50400.7	6204.89	5636.81	22:hsa;hsa-let-7b,46113691,46113712,+	6041.47	5488.36
hsa-miR-30d-5p	299	49921	49891.5	5983.97	5436.12	8:hsa;hsa-mir-30d,134804881,134804902,-	5980.43	5432.91
hsa-miR-28-3p	207	49689	49689	5956.16	5410.86	3:hsa;hsa-mir-28,188688834,188688855,+	5956.16	5410.86
hsa-miR-26b-5p	231	43885	43885	5260.44	4778.83	2:hsa;hsa-mir-26b,218402657,218402677,+	5260.44	4778.83
hsa-miR-30e-5p	271	39414	39401	4724.51	4291.97	1:hsa;hsa-mir-30e,40754371,40754392,+	4722.95	4290.55
hsa-let-7g-5p	217	38773	38461.2	4647.67	4222.16	3:hsa;hsa-let-7g,52268282,52268303,-	4610.29	4188.21
hsa-miR-654-3p	349	37843	37843	4536.19	4120.89	14:hsa;hsa-mir-654,101040269,101040290,+	4536.19	4120.89
hsa-miR-181b-5p	360	37530	19318.2	4498.68	4086.81	9:hsa;hsa-mir-181b-2,124693725,124693747,+	2315.65	2103.64
hsa-miR-92b-3p	766	36668	36667.3	4395.35	3992.94	1:hsa;hsa-mir-92b,155195237,155195258,+	4395.27	3992.87
hsa-miR-181b-5p	339	36590	18378.2	4386	3984.45	1:hsa;hsa-mir-181b-1,198858908,198858930,-	2202.97	2001.28
hsa-miR-31-5p	186	36022	36022	4317.91	3922.6	9:hsa;hsa-mir-31,21512122,21512142,-	4317.91	3922.6
hsa-miR-186-5p	241	32734	32734	3923.79	3564.55	1:hsa;hsa-mir-186,71067645,71067666,-	3923.79	3564.55
hsa-miR-199b-5p	214	30747	30723	3685.61	3348.18	9:hsa;hsa-mir-199b,128244746,128244768,-	3682.73	3345.56
hsa-miR-199a-5p	270	28362	14175	3399.72	3088.46	1:hsa;hsa-mir-199a-2,172144565,172144587,-	1699.14	1543.58
hsa-miR-199a-5p	270	28362	14175	3399.72	3088.46	19:hsa;hsa-mir-199a-1,10817431,10817453,-	1699.14	1543.58
hsa-miR-103a-3p	373	28244	13704.5	3385.57	3075.61	20:hsa;hsa-mir-103a-2,3917541,3917563,+	1642.74	1492.34
hsa-miR-103a-3p	354	28122	13583.5	3370.95	3062.33	5:hsa;hsa-mir-103a-1,168560943,168560965,-	1628.24	1479.17
hsa-miR-409-3p	352	27147	27147	3254.08	2956.16	14:hsa;hsa-mir-409,101065346,101065367,+	3254.08	2956.16
hsa-miR-125a-5p	209	26216	26216	3142.48	2854.78	19:hsa;hsa-mir-125a,51693268,51693291,+	3142.48	2854.78
hsa-miR-25-3p	154	23734	23734	2844.97	2584.5	7:hsa;hsa-mir-25,100093611,100093632,-	2844.97	2584.5
hsa-miR-381-3p	166	21126	21126	2532.35	2300.5	14:hsa;hsa-mir-381,101045968,101045989,+	2532.35	2300.5
hsa-miR-125b-1-3p	234	20708	20708	2482.24	2254.99	11:hsa;hsa-mir-125b-1,122099811,122099832,-	2482.24	2254.99
hsa-miR-130a-3p	224	20377	20377	2442.57	2218.94	11:hsa;hsa-mir-130a,57641252,57641273,+	2442.57	2218.94
hsa-miR-23a-3p	218	17882	17805.5	2143.49	1947.25	19:hsa;hsa-mir-23a,13836631,13836651,-	2134.32	1938.92
hsa-miR-10b-5p	174	17394	17285.5	2085	1894.11	2:hsa;hsa-mir-10b,176150329,176150351,+	2071.99	1882.29
hsa-miR-99b-5p	208	17267	17267	2069.77	1880.28	19:hsa;hsa-mir-99b,51692618,51692639,+	2069.77	1880.28
hsa-let-7d-5p	154	15987	15615.7	1916.34	1740.9	9:hsa;hsa-let-7d,94178841,94178862,+	1871.84	1700.46
hsa-miR-23b-3p	231	15697	15619.5	1881.58	1709.32	9:hsa;hsa-mir-23b,95085265,95085287,+	1872.29	1700.88
hsa-miR-21-3p	182	14906	14906	1786.76	1623.18	17:hsa;hsa-mir-21,59841311,59841331,+	1786.76	1623.18
hsa-miR-101-3p	238	13876	7020.5	1663.3	1511.02	9:hsa;hsa-mir-101-2,4850345,4850365,+	841.539	764.493
hsa-miR-101-3p	224	13716	6860.5	1644.12	1493.6	1:hsa;hsa-mir-101-1,65058480,65058500,-	822.36	747.07
hsa-miR-196b-5p	205	13309	13307.2	1595.33	1449.28	7:hsa;hsa-mir-196b,27169494,27169515,-	1595.11	1449.08
hsa-let-7c-5p	172	13122	12697.2	1572.92	1428.91	21:hsa;hsa-let-7c,16539838,16539859,+	1521.99	1382.65
hsa-miR-148b-3p	163	12761	12758.5	1529.65	1389.6	12:hsa;hsa-mir-148b,54337278,54337299,+	1529.35	1389.33
hsa-miR-423-5p	212	12521	12521	1500.88	1363.47	17:hsa;hsa-mir-423,30117095,30117117,+	1500.88	1363.47
hsa-miR-196a-5p	159	12469	9832.17	1494.64	1357.8	12:hsa;hsa-mir-196a-2,53991762,53991783,+	1178.57	1070.67
hsa-let-7e-5p	206	11483	11301.1	1376.45	1250.43	19:hsa;hsa-let-7e,51692793,51692814,+	1354.66	1230.63
hsa-miR-155-5p	241	11327	11327	1357.75	1233.45	21:hsa;hsa-mir-155,25573983,25574006,+	1357.75	1233.45
hsa-miR-410-3p	80	11304	11304	1355	1230.94	14:hsa;hsa-mir-410,101065961,101065981,+	1355	1230.94
hsa-miR-148a-3p	129	10803	10800.5	1294.94	1176.39	7:hsa;hsa-mir-148a,25949962,25949983,-	1294.64	1176.11
hsa-miR-181c-5p	136	10731	10731	1286.31	1168.55	19:hsa;hsa-mir-181c,13874725,13874746,+	1286.31	1168.55
hsa-miR-24-3p	159	10654	5364	1277.08	1160.16	9:hsa;hsa-mir-24-1,95086064,95086085,+	642.976	584.11
hsa-miR-24-3p	147	10580	5290	1268.21	1152.1	19:hsa;hsa-mir-24-2,13836336,13836357,-	634.106	576.052
hsa-miR-28-5p	98	10091	10091	1209.6	1098.85	3:hsa;hsa-mir-28,188688794,188688815,+	1209.6	1098.85
hsa-miR-423-3p	234	9800	9800	1174.71	1067.17	17:hsa;hsa-mir-423,30117131,30117153,+	1174.71	1067.17
hsa-miR-136-3p	104	9787	9787	1173.16	1065.75	14:hsa;hsa-mir-136,100884750,100884771,+	1173.16	1065.75
hsa-miR-152-3p	238	9467	9467	1134.8	1030.9	17:hsa;hsa-mir-152,48037214,48037234,-	1134.8	1030.9
hsa-miR-146b-5p	128	9375	9375	1123.77	1020.89	10:hsa;hsa-mir-146b,102436520,102436542,+	1123.77	1020.89
hsa-miR-192-5p	165	9260	9260	1109.99	1008.36	11:hsa;hsa-mir-192,64891160,64891180,-	1109.99	1008.36
hsa-miR-98-5p	94	8167	8100.55	978.97	889.34	X:hsa;hsa-mir-98,53556244,53556265,-	971.003	882.105
hsa-miR-181a-2-3p	125	7443	7443	892.18	810.5	9:hsa;hsa-mir-181a-2,124692518,124692539,+	892.183	810.501
hsa-miR-493-5p	112	7374	7374	883.91	802.99	14:hsa;hsa-mir-493,100869075,100869096,+	883.912	802.988
hsa-miR-431-5p	66	6544	6544	784.42	712.61	14:hsa;hsa-mir-431,100881026,100881046,+	784.421	712.605
hsa-miR-301a-3p	73	6496	6494.5	778.67	707.38	17:hsa;hsa-mir-301a,59151186,59151208,-	778.488	707.215
hsa-miR-196a-5p	97	6494	3857.67	778.43	707.16	17:hsa;hsa-mir-196a-1,48632496,48632517,-	462.414	420.078
hsa-miR-320a-3p	241	5594	5234.34	670.55	609.16	8:hsa;hsa-mir-320a,22245007,22245028,-	627.434	569.99
hsa-miR-769-5p	72	5430	5430	650.89	591.3	19:hsa;hsa-mir-769,46018961,46018982,+	650.888	591.297
hsa-miR-30b-5p	65	5277	5277	632.55	574.64	8:hsa;hsa-mir-30b,134800536,134800557,-	632.548	574.636
hsa-miR-140-3p	195	5073	5073	608.09	552.42	16:hsa;hsa-mir-140,69933142,69933162,+	608.094	552.422
hsa-miR-27b-5p	79	4822	4822	578.01	525.09	9:hsa;hsa-mir-27b,95085463,95085484,+	578.007	525.089
hsa-miR-107	156	4785	2810	573.57	521.06	10:hsa;hsa-mir-107,89592796,89592818,-	336.831	305.993
hsa-miR-486-5p	179	4755	2525	569.98	517.79	8:hsa;hsa-mir-486-2,41660444,41660465,+	302.669	274.958
hsa-miR-34c-5p	55	4622	4622	554.03	503.31	11:hsa;hsa-mir-34c,111513451,111513473,+	554.034	503.31
hsa-miR-493-3p	77	4613	4613	552.95	502.33	14:hsa;hsa-mir-493,100869116,100869137,+	552.955	502.33
hsa-miR-486-5p	151	4509	2279	540.49	491.01	8:hsa;hsa-mir-486-1,41660444,41660465,-	273.181	248.17
hsa-miR-130b-3p	102	4453	4453	533.78	484.91	22:hsa;hsa-mir-130b,21653354,21653375,+	533.776	484.907
hsa-miR-93-5p	110	4153	4153	497.82	452.24	7:hsa;hsa-mir-93,100093778,100093800,-	497.815	452.239
hsa-miR-221-5p	92	3769	3769	451.79	410.42	X:hsa;hsa-mir-221,45746181,45746202,-	451.785	410.423
hsa-miR-224-5p	89	3765	3765	451.31	409.99	X:hsa;hsa-mir-224,151958584,151958608,-	451.306	409.988
hsa-miR-99a-5p	67	3664	3589.5	439.2	398.99	21:hsa;hsa-mir-99a,16539101,16539122,+	430.269	390.877
hsa-miR-30c-5p	75	3652	1828	437.76	397.68	6:hsa;hsa-mir-30c-2,71376966,71376988,-	219.12	199.059
hsa-miR-30c-5p	73	3648	1824	437.28	397.25	1:hsa;hsa-mir-30c-1,40757300,40757322,+	218.641	198.623
hsa-miR-15a-5p	58	3537	3537	423.98	385.16	13:hsa;hsa-mir-15a,50049132,50049153,-	423.976	385.16
hsa-miR-889-3p	53	3476	3476	416.66	378.52	14:hsa;hsa-mir-889,101047949,101047969,+	416.664	378.517
hsa-miR-128-3p	112	3089	1749	370.27	336.37	2:hsa;hsa-mir-128-1,135665446,135665466,+	209.651	190.456
hsa-miR-181a-3p	71	3059	3055.5	366.68	333.11	1:hsa;hsa-mir-181a-1,198859107,198859128,-	366.259	332.727
hsa-miR-345-5p	60	2955	2955	354.21	321.78	14:hsa;hsa-mir-345,100307876,100307897,+	354.212	321.783
hsa-miR-455-5p	103	2907	2907	348.46	316.56	9:hsa;hsa-mir-455,114209449,114209470,+	348.459	316.556
hsa-miR-15b-5p	48	2829	2829	339.11	308.06	3:hsa;hsa-mir-15b,160404607,160404628,+	339.109	308.062
hsa-miR-128-3p	87	2724	1384	326.52	296.63	3:hsa;hsa-mir-128-2,35744527,35744547,+	165.898	150.71
hsa-miR-744-5p	53	2630	2630	315.25	286.39	17:hsa;hsa-mir-744,12081909,12081930,+	315.255	286.392
hsa-miR-425-5p	88	2613	2613	313.22	284.54	3:hsa;hsa-mir-425,49020161,49020183,-	313.217	284.541
hsa-miR-30a-3p	97	2592	2591	310.7	282.25	6:hsa;hsa-mir-30a,71403597,71403618,-	310.58	282.146
hsa-miR-369-5p	41	2551	2551	305.79	277.79	14:hsa;hsa-mir-369,101065606,101065627,+	305.785	277.79
hsa-miR-30e-3p	55	2466	2465	295.6	268.53	1:hsa;hsa-mir-30e,40754413,40754434,+	295.477	268.425
hsa-miR-100-3p	36	2241	2241	268.63	244.03	11:hsa;hsa-mir-100,122152276,122152297,-	268.626	244.032
hsa-miR-132-3p	80	2186	2186	262.03	238.04	17:hsa;hsa-mir-132,2049966,2049987,-	262.033	238.043
hsa-miR-487b-3p	90	2160	2160	258.92	235.21	14:hsa;hsa-mir-487b,101046505,101046526,+	258.917	235.212
hsa-miR-424-5p	44	2155	2155	258.32	234.67	X:hsa;hsa-mir-424,134546624,134546645,-	258.317	234.668
hsa-miR-126-5p	26	2132	2132	255.56	232.16	9:hsa;hsa-mir-126,136670616,136670636,+	255.56	232.163
hsa-miR-181d-5p	68	2025	2023.67	242.73	220.51	19:hsa;hsa-mir-181d,13874910,13874932,+	242.574	220.366
hsa-miR-374a-3p	41	2019	2019	242.02	219.86	X:hsa;hsa-mir-374a,74287327,74287348,-	242.015	219.858
hsa-miR-549a-5p	27	1957	1957	234.58	213.11	15:hsa;hsa-mir-549a,80842005,80842026,-	234.583	213.106
hsa-miR-432-5p	133	1947	1947	233.38	212.02	14:hsa;hsa-mir-432,100884496,100884518,+	233.385	212.017
hsa-miR-484	97	1927	1927	230.99	209.84	16:hsa;hsa-mir-484,15643301,15643322,+	230.987	209.84
hsa-miR-218-5p	56	1898	968	227.51	206.68	4:hsa;hsa-mir-218-1,20528299,20528319,+	116.033	105.41
hsa-miR-136-5p	49	1866	1866	223.68	203.2	14:hsa;hsa-mir-136,100884716,100884738,+	223.675	203.197
hsa-miR-218-5p	51	1862	932	223.2	202.76	5:hsa;hsa-mir-218-2,168768170,168768190,-	111.718	101.49
hsa-miR-145-5p	57	1848	1848	221.52	201.24	5:hsa;hsa-mir-145,149430661,149430683,+	221.518	201.237
hsa-miR-450b-5p	47	1825	1825	218.76	198.73	X:hsa;hsa-mir-450b,134540195,134540216,-	218.761	198.732
hsa-miR-361-5p	57	1824	1824	218.64	198.62	X:hsa;hsa-mir-361,85903641,85903662,-	218.641	198.623
hsa-miR-181c-3p	58	1748	1744.5	209.53	190.35	19:hsa;hsa-mir-181c,13874763,13874784,+	209.111	189.966
hsa-miR-378a-3p	53	1720	1699.25	206.17	187.3	5:hsa;hsa-mir-378a,149732867,149732888,+	203.687	185.039
hsa-miR-19b-3p	40	1660	835.83	198.98	180.76	X:hsa;hsa-mir-19b-2,134169732,134169754,-	100.19	91.0176
hsa-miR-19b-3p	39	1651	826.83	197.9	179.78	13:hsa;hsa-mir-19b-1,91351245,91351267,+	99.1115	90.0376
hsa-miR-340-5p	44	1650	1650	197.78	179.68	5:hsa;hsa-mir-340,180015318,180015339,-	197.784	179.676
hsa-miR-145-3p	87	1639	1639	196.46	178.48	5:hsa;hsa-mir-145,149430699,149430720,+	196.465	178.478
hsa-miR-424-3p	72	1632	1632	195.63	177.72	X:hsa;hsa-mir-424,134546661,134546681,-	195.626	177.716
hsa-miR-34a-5p	77	1595	1595	191.19	173.69	1:hsa;hsa-mir-34a,9151689,9151710,-	191.191	173.687
hsa-miR-134-5p	82	1415	1415	169.61	154.09	14:hsa;hsa-mir-134,101054694,101054715,+	169.614	154.086
hsa-miR-151b	28	1399	761	167.7	152.34	14:hsa;hsa-mir-151b,100109478,100109495,-	91.2202	82.8687
hsa-miR-299-3p	52	1377	1377	165.06	149.95	14:hsa;hsa-mir-299,101023832,101023853,+	165.059	149.948
hsa-miR-301b-3p	30	1376	1374.5	164.94	149.84	22:hsa;hsa-mir-301b,21653025,21653047,+	164.76	149.675
hsa-miR-370-3p	115	1352	1352	162.06	147.23	14:hsa;hsa-mir-370,100911186,100911207,+	162.063	147.225
hsa-miR-125b-2-3p	68	1346	1346	161.34	146.57	21:hsa;hsa-mir-125b-2,16590290,16590311,+	161.343	146.572
hsa-miR-1307-5p	48	1277	1277	153.07	139.06	10:hsa;hsa-mir-1307,103394293,103394313,-	153.072	139.058
hsa-miR-214-5p	46	1259	1259	150.91	137.1	1:hsa;hsa-mir-214,172138827,172138848,-	150.915	137.098
hsa-miR-106b-3p	85	1214	1214	145.52	132.2	7:hsa;hsa-mir-106b,100094044,100094065,-	145.521	132.198
hsa-miR-941	29	1197	70.41	143.48	130.35	20:hsa;hsa-mir-941-2,63919551,63919573,+	8.44017	7.66745
hsa-miR-941	29	1197	70.41	143.48	130.35	20:hsa;hsa-mir-941-2,63919802,63919824,+	8.44017	7.66745
hsa-miR-542-3p	74	1197	1197	143.48	130.35	X:hsa;hsa-mir-542,134541393,134541414,-	143.483	130.347
hsa-miR-941	29	1197	70.41	143.48	130.35	20:hsa;hsa-mir-941-5,63919551,63919573,+	8.44017	7.66745
hsa-miR-941	29	1197	70.41	143.48	130.35	20:hsa;hsa-mir-941-2,63919607,63919629,+	8.44017	7.66745
hsa-miR-941	29	1197	70.41	143.48	130.35	20:hsa;hsa-mir-941-3,63919607,63919629,+	8.44017	7.66745
hsa-miR-941	29	1197	70.41	143.48	130.35	20:hsa;hsa-mir-941-5,63919914,63919936,+	8.44017	7.66745
hsa-miR-941	29	1197	70.41	143.48	130.35	20:hsa;hsa-mir-941-4,63919914,63919936,+	8.44017	7.66745
hsa-miR-941	29	1197	70.41	143.48	130.35	20:hsa;hsa-mir-941-4,63919607,63919629,+	8.44017	7.66745
hsa-miR-941	29	1197	70.41	143.48	130.35	20:hsa;hsa-mir-941-4,63919802,63919824,+	8.44017	7.66745
hsa-miR-941	29	1197	70.41	143.48	130.35	20:hsa;hsa-mir-941-3,63919802,63919824,+	8.44017	7.66745
hsa-miR-941	29	1197	70.41	143.48	130.35	20:hsa;hsa-mir-941-3,63919914,63919936,+	8.44017	7.66745
hsa-miR-941	29	1197	70.41	143.48	130.35	20:hsa;hsa-mir-941-3,63919551,63919573,+	8.44017	7.66745
hsa-miR-941	29	1197	70.41	143.48	130.35	20:hsa;hsa-mir-941-5,63919802,63919824,+	8.44017	7.66745
hsa-miR-941	29	1197	70.41	143.48	130.35	20:hsa;hsa-mir-941-4,63919551,63919573,+	8.44017	7.66745
hsa-miR-941	29	1197	70.41	143.48	130.35	20:hsa;hsa-mir-941-2,63919914,63919936,+	8.44017	7.66745
hsa-miR-941	29	1197	70.41	143.48	130.35	20:hsa;hsa-mir-941-1,63919495,63919517,+	8.44017	7.66745
hsa-miR-941	29	1197	70.41	143.48	130.35	20:hsa;hsa-mir-941-5,63919607,63919629,+	8.44017	7.66745
hsa-miR-574-3p	79	1196	1196	143.36	130.24	4:hsa;hsa-mir-574,38868092,38868113,+	143.363	130.238
hsa-miR-454-3p	36	1196	1196	143.36	130.24	17:hsa;hsa-mir-454,59137821,59137843,-	143.363	130.238
hsa-miR-374a-5p	28	1185	1184.5	142.04	129.04	X:hsa;hsa-mir-374a,74287297,74287318,-	141.985	128.985
hsa-miR-421	75	1177	1177	141.09	128.17	X:hsa;hsa-mir-421,74218424,74218446,-	141.086	128.169
hsa-miR-584-5p	67	1128	1128	135.21	122.83	5:hsa;hsa-mir-584,149062328,149062349,-	135.212	122.833
hsa-miR-532-5p	72	1128	1128	135.21	122.83	X:hsa;hsa-mir-532,50003167,50003188,+	135.212	122.833
hsa-miR-382-5p	45	1120	1120	134.25	121.96	14:hsa;hsa-mir-382,101054316,101054337,+	134.253	121.962
hsa-miR-887-3p	81	1119	1119	134.13	121.85	5:hsa;hsa-mir-887,15935229,15935250,+	134.133	121.853
hsa-miR-210-3p	86	1108	1108	132.81	120.66	11:hsa;hsa-mir-210,568154,568175,-	132.815	120.655
hsa-miR-1468-5p	33	1080	1080	129.46	117.61	X:hsa;hsa-mir-1468,63786014,63786034,-	129.458	117.606
hsa-miR-365b-3p	45	1067	534	127.9	116.19	17:hsa;hsa-mir-365b,31575478,31575499,+	64.0099	58.1496
hsa-miR-365a-3p	44	1066	533	127.78	116.08	16:hsa;hsa-mir-365a,14309340,14309361,+	63.8901	58.0407
hsa-miR-450a-5p	44	1059	531.5	126.94	115.32	X:hsa;hsa-mir-450a-2,134540530,134540551,-	63.7103	57.8774
hsa-miR-450a-5p	43	1056	528.5	126.58	114.99	X:hsa;hsa-mir-450a-1,134540358,134540379,-	63.3507	57.5507
hsa-miR-671-3p	73	1035	1035	124.06	112.71	7:hsa;hsa-mir-671,151238488,151238508,+	124.064	112.706
hsa-miR-342-3p	64	1031	1031	123.58	112.27	14:hsa;hsa-mir-342,100109715,100109737,+	123.585	112.27
hsa-miR-24-2-5p	55	1023	1023	122.63	111.4	19:hsa;hsa-mir-24-2,13836299,13836320,-	122.626	111.399
hsa-miR-29c-3p	63	990	988.5	118.67	107.81	1:hsa;hsa-mir-29c,207801905,207801926,-	118.49	107.642
hsa-miR-29b-3p	43	969	488.83	116.15	105.52	1:hsa;hsa-mir-29b-2,207802494,207802516,-	58.5959	53.2312
hsa-miR-29b-3p	42	961	480.83	115.19	104.65	7:hsa;hsa-mir-29b-1,130877509,130877531,-	57.6369	52.3601
hsa-miR-539-3p	61	913	913	109.44	99.42	14:hsa;hsa-mir-539,101047369,101047390,+	109.44	99.4206
hsa-miR-10a-5p	51	892	780	106.92	97.13	17:hsa;hsa-mir-10a,48579859,48579881,-	93.4977	84.9377
hsa-miR-106b-5p	74	876	876	105.01	95.39	7:hsa;hsa-mir-106b,100094004,100094024,-	105.005	95.3915
hsa-miR-130b-5p	30	875	875	104.89	95.28	22:hsa;hsa-mir-130b,21653316,21653336,+	104.885	95.2826
hsa-miR-339-3p	48	854	854	102.37	93	7:hsa;hsa-mir-339,1022982,1023004,-	102.368	92.9959
hsa-miR-1185-1-3p	48	847	813	101.53	92.23	14:hsa;hsa-mir-1185-1,101043029,101043050,+	97.4533	88.5312
hsa-miR-758-3p	31	836	836	100.21	91.04	14:hsa;hsa-mir-758,101026071,101026092,+	100.21	91.0358
hsa-miR-17-5p	45	817	815.83	97.93	88.97	13:hsa;hsa-mir-17,91350618,91350640,+	97.793	88.8397
hsa-miR-376c-3p	49	803	803	96.25	87.44	14:hsa;hsa-mir-376c,101039732,101039752,+	96.2546	87.4422
hsa-miR-204-5p	29	788	788	94.46	85.81	9:hsa;hsa-mir-204,70810007,70810028,-	94.4566	85.8088
hsa-miR-1260b	5	766	418	91.82	83.41	11:hsa;hsa-mir-1260b,96341447,96341465,+	50.1052	45.5179
hsa-miR-654-5p	57	762	762	91.34	82.98	14:hsa;hsa-mir-654,101040234,101040255,+	91.34	82.9776
hsa-miR-152-5p	29	754	754	90.38	82.11	17:hsa;hsa-mir-152,48037176,48037198,-	90.3811	82.1064
hsa-miR-335-3p	34	753	753	90.26	82	7:hsa;hsa-mir-335,130496162,130496183,+	90.2612	81.9975
hsa-miR-411-3p	32	735	735	88.1	80.04	14:hsa;hsa-mir-411,101023375,101023396,+	88.1036	80.0374
hsa-miR-1260a	11	723	375	86.67	78.73	14:hsa;hsa-mir-1260a,77266231,77266248,+	44.9508	40.8354
hsa-miR-148b-5p	32	715	715	85.71	77.86	12:hsa;hsa-mir-148b,54337240,54337261,+	85.7062	77.8595
hsa-miR-500a-3p	51	712	636.5	85.35	77.53	X:hsa;hsa-mir-500a,50008482,50008503,+	76.2965	69.3113
hsa-miR-193b-3p	64	689	689	82.59	75.03	16:hsa;hsa-mir-193b,14304017,14304038,+	82.5896	75.0283
hsa-miR-193a-3p	22	689	689	82.59	75.03	17:hsa;hsa-mir-193a,31560050,31560071,+	82.5896	75.0283
hsa-miR-127-5p	67	686	686	82.23	74.7	14:hsa;hsa-mir-127,100883001,100883022,+	82.23	74.7016
hsa-miR-369-3p	36	680	680	81.51	74.05	14:hsa;hsa-mir-369,101065641,101065661,+	81.5108	74.0482
hsa-miR-214-3p	127	676	676	81.03	73.61	1:hsa;hsa-mir-214,172138868,172138889,-	81.0313	73.6126
hsa-miR-182-5p	33	645	645	77.32	70.24	7:hsa;hsa-mir-182,129770405,129770428,-	77.3154	70.2369
hsa-miR-335-5p	16	641	641	76.84	69.8	7:hsa;hsa-mir-335,130496126,130496148,+	76.8359	69.8013
hsa-miR-660-5p	27	633	633	75.88	68.93	X:hsa;hsa-mir-660,50013256,50013277,+	75.8769	68.9302
hsa-miR-30d-3p	25	622	622	74.56	67.73	8:hsa;hsa-mir-30d,134804921,134804942,-	74.5584	67.7323
hsa-miR-1307-3p	38	614	614	73.6	66.86	10:hsa;hsa-mir-1307,103394332,103394353,-	73.5994	66.8612
hsa-miR-320b	56	601	205.75	72.04	65.45	1:hsa;hsa-mir-320b-2,224257080,224257101,-	24.6636	22.4056
hsa-miR-320b	52	597	202.25	71.56	65.01	1:hsa;hsa-mir-320b-1,116671787,116671808,+	24.244	22.0244
hsa-miR-490-3p	48	594	594	71.2	64.68	7:hsa;hsa-mir-490,136903242,136903263,+	71.2021	64.6833
hsa-miR-138-5p	28	556	288.5	66.65	60.55	3:hsa;hsa-mir-138-1,44114234,44114256,+	34.5821	31.416
hsa-miR-374b-5p	26	554	553.5	66.41	60.33	X:hsa;hsa-mir-374b,74218557,74218578,-	66.3474	60.2731
hsa-miR-361-3p	42	543	543	65.09	59.13	X:hsa;hsa-mir-361,85903680,85903702,-	65.0888	59.1297
hsa-miR-138-5p	28	542	274.5	64.97	59.02	16:hsa;hsa-mir-138-2,56858527,56858549,+	32.904	29.8915
hsa-miR-16-2-3p	28	515	515	61.73	56.08	3:hsa;hsa-mir-16-2,160404797,160404818,+	61.7324	56.0806
hsa-miR-212-3p	33	509	509	61.01	55.43	17:hsa;hsa-mir-212,2050341,2050361,-	61.0132	55.4273
hsa-miR-12136	15	501	250.5	60.05	54.56	MT:hsa;hsa-mir-12136,7444,7461,-	30.0271	27.2781
hsa-miR-12136	15	501	250.5	60.05	54.56	1:hsa;hsa-mir-12136,632615,632632,-	30.0271	27.2781
hsa-miR-487a-3p	14	490	490	58.74	53.36	14:hsa;hsa-mir-487a,101052494,101052515,+	58.7357	53.3583
hsa-miR-99b-3p	66	489	489	58.62	53.25	19:hsa;hsa-mir-99b,51692656,51692677,+	58.6158	53.2494
hsa-miR-132-5p	25	487	487	58.38	53.03	17:hsa;hsa-mir-132,2049930,2049951,-	58.3761	53.0316
hsa-miR-485-5p	19	454	454	54.42	49.44	14:hsa;hsa-mir-485,101055427,101055448,+	54.4204	49.4381
hsa-miR-27a-5p	20	448	448	53.7	48.78	19:hsa;hsa-mir-27a,13836449,13836470,-	53.7012	48.7847
hsa-miR-19a-3p	29	435	434.33	52.14	47.37	13:hsa;hsa-mir-19a,91350939,91350961,+	52.063	47.2965
hsa-miR-149-5p	35	434	434	52.02	47.26	2:hsa;hsa-mir-149,240456015,240456037,+	52.0231	47.2602
hsa-miR-3615	38	427	427	51.18	46.5	17:hsa;hsa-mir-3615,74748663,74748683,+	51.184	46.4979
hsa-miR-379-3p	27	427	427	51.18	46.5	14:hsa;hsa-mir-379,101022109,101022130,+	51.184	46.4979
hsa-miR-1304-3p	30	422	422	50.58	45.95	11:hsa;hsa-mir-1304,93733726,93733747,-	50.5846	45.9535
hsa-miR-376a-5p	25	422	422	50.58	45.95	14:hsa;hsa-mir-376a-1,101040788,101040809,+	50.5846	45.9535
hsa-miR-589-5p	27	421	421	50.46	45.84	7:hsa;hsa-mir-589,5495842,5495863,-	50.4648	45.8446
hsa-miR-146a-5p	49	413	413	49.51	44.97	5:hsa;hsa-mir-146a,160485372,160485393,+	49.5058	44.9734
hsa-miR-452-5p	37	404	404	48.43	43.99	X:hsa;hsa-mir-452,151959641,151959662,-	48.427	43.9934
hsa-miR-561-5p	17	403	403	48.31	43.88	2:hsa;hsa-mir-561,188297517,188297538,+	48.3071	43.8845
hsa-miR-7706	28	387	387	46.39	42.14	15:hsa;hsa-mir-7706,85380639,85380662,+	46.3892	42.1421
hsa-miR-543	39	386	386	46.27	42.03	14:hsa;hsa-mir-543,101032033,101032054,+	46.2694	42.0333
hsa-miR-222-5p	28	381	381	45.67	41.49	X:hsa;hsa-mir-222,45747045,45747066,-	45.67	41.4888
hsa-miR-337-3p	43	378	378	45.31	41.16	14:hsa;hsa-mir-337,100874553,100874574,+	45.3104	41.1621
hsa-miR-153-3p	26	370	185	44.35	40.29	7:hsa;hsa-mir-153-2,157574388,157574409,-	22.1757	20.1455
hsa-miR-153-3p	26	370	185	44.35	40.29	2:hsa;hsa-mir-153-1,219294164,219294185,-	22.1757	20.1455
hsa-miR-455-3p	52	367	367	43.99	39.96	9:hsa;hsa-mir-455,114209487,114209507,+	43.9918	39.9643
hsa-miR-30c-1-3p	16	361	361	43.27	39.31	1:hsa;hsa-mir-30c-1,40757339,40757360,+	43.2726	39.3109
hsa-miR-26b-3p	20	360	360	43.15	39.2	2:hsa;hsa-mir-26b,218402692,218402712,+	43.1528	39.202
hsa-miR-665	34	352	352	42.19	38.33	14:hsa;hsa-mir-665,100875075,100875094,+	42.1938	38.3308
hsa-miR-377-3p	26	332	332	39.8	36.15	14:hsa;hsa-mir-377,101062094,101062115,+	39.7964	36.153
hsa-miR-615-3p	40	329	329	39.44	35.83	12:hsa;hsa-mir-615,54034010,54034031,+	39.4368	35.8263
hsa-miR-331-3p	47	320	320	38.36	34.85	12:hsa;hsa-mir-331,95308480,95308500,+	38.358	34.8462
hsa-miR-548k	13	318	318	38.12	34.63	11:hsa;hsa-mir-548k,70283986,70284007,+	38.1183	34.6284
hsa-miR-494-3p	30	313	313	37.52	34.08	14:hsa;hsa-mir-494,101029681,101029702,+	37.5189	34.084
hsa-miR-20a-5p	24	295	294.33	35.36	32.12	13:hsa;hsa-mir-20a,91351072,91351094,+	35.2814	32.0513
hsa-miR-323a-3p	22	285	285	34.16	31.03	14:hsa;hsa-mir-323a,101025782,101025802,+	34.1626	31.0349
hsa-miR-1287-5p	12	284	284	34.04	30.93	10:hsa;hsa-mir-1287,98395233,98395254,-	34.0427	30.926
hsa-miR-126-3p	24	284	284	34.04	30.93	9:hsa;hsa-mir-126,136670653,136670674,+	34.0427	30.926
hsa-miR-376a-3p	21	278	139.33	33.32	30.27	14:hsa;hsa-mir-376a-2,101040118,101040138,+	16.7017	15.1726
hsa-miR-376a-3p	20	277	138.33	33.2	30.16	14:hsa;hsa-mir-376a-1,101040825,101040845,+	16.5818	15.0637
hsa-miR-454-5p	20	274	274	32.84	29.84	17:hsa;hsa-mir-454,59137781,59137802,-	32.844	29.8371
hsa-miR-330-5p	16	269	269	32.24	29.29	19:hsa;hsa-mir-330,45639011,45639032,-	32.2447	29.2926
hsa-miR-140-5p	28	267	267	32	29.07	16:hsa;hsa-mir-140,69933103,69933124,+	32.005	29.0748
hsa-miR-641	25	266	266	31.89	28.97	19:hsa;hsa-mir-641,40282558,40282581,-	31.8851	28.9659
hsa-miR-125a-3p	23	260	260	31.17	28.31	19:hsa;hsa-mir-125a,51693306,51693327,+	31.1659	28.3126
hsa-miR-377-5p	9	255	255	30.57	27.77	14:hsa;hsa-mir-377,101062056,101062077,+	30.5665	27.7681
hsa-miR-29a-5p	20	254	254	30.45	27.66	7:hsa;hsa-mir-29a,130876750,130876771,-	30.4467	27.6592
hsa-miR-431-3p	35	253	253	30.33	27.55	14:hsa;hsa-mir-431,100881069,100881090,+	30.3268	27.5503
hsa-miR-30c-2-3p	13	250	250	29.97	27.22	6:hsa;hsa-mir-30c-2,71377006,71377027,-	29.9672	27.2236
hsa-miR-143-5p	20	245	245	29.37	26.68	5:hsa;hsa-mir-143,149428944,149428965,+	29.3679	26.6791
hsa-miR-708-3p	17	241	241	28.89	26.24	11:hsa;hsa-mir-708,79402078,79402099,-	28.8884	26.2436
hsa-miR-154-5p	15	241	241	28.89	26.24	14:hsa;hsa-mir-154,101059769,101059790,+	28.8884	26.2436
hsa-miR-22-5p	17	230	230	27.57	25.05	17:hsa;hsa-mir-22,1713917,1713938,-	27.5698	25.0457
hsa-miR-4775	15	227	227	27.21	24.72	2:hsa;hsa-mir-4775,207754816,207754837,+	27.2102	24.719
hsa-miR-1180-3p	20	223	223	26.73	24.28	17:hsa;hsa-mir-1180,19344546,19344567,-	26.7307	24.2835
hsa-miR-503-5p	62	219	219	26.25	23.85	X:hsa;hsa-mir-503,134546333,134546355,-	26.2513	23.8479
hsa-miR-194-5p	15	217	114.5	26.01	23.63	11:hsa;hsa-mir-194-2,64891369,64891390,-	13.725	12.4684
hsa-miR-194-5p	15	216	113.5	25.89	23.52	1:hsa;hsa-mir-194-1,220118171,220118192,-	13.6051	12.3595
hsa-miR-668-3p	36	212	212	25.41	23.09	14:hsa;hsa-mir-668,101055300,101055322,+	25.4122	23.0856
hsa-miR-412-5p	9	207	207	24.81	22.54	14:hsa;hsa-mir-412,101065465,101065487,+	24.8128	22.5411
hsa-miR-323b-3p	18	201	201	24.09	21.89	14:hsa;hsa-mir-323b,101056269,101056290,+	24.0936	21.8878
hsa-miR-708-5p	24	198	198	23.73	21.56	11:hsa;hsa-mir-708,79402032,79402054,-	23.734	21.5611
hsa-let-7a-3p	18	198	100	23.73	21.56	9:hsa;hsa-let-7a-1,94176013,94176033,+	11.9869	10.8894
hsa-let-7a-3p	16	196	98	23.49	21.34	22:hsa;hsa-let-7a-3,46112800,46112820,+	11.7471	10.6717
hsa-miR-9985	9	188	91.17	22.54	20.47	Y:hsa;hsa-mir-9985,4606140,4606158,+	10.928	9.92754
hsa-miR-628-5p	26	186	186	22.3	20.25	15:hsa;hsa-mir-628,55372962,55372983,-	22.2956	20.2544
hsa-miR-874-3p	23	183	183	21.94	19.93	5:hsa;hsa-mir-874,137647618,137647639,-	21.936	19.9277
hsa-miR-17-3p	27	182	182	21.82	19.82	13:hsa;hsa-mir-17,91350655,91350676,+	21.8161	19.8188
hsa-miR-576-5p	9	180	180	21.58	19.6	4:hsa;hsa-mir-576,109488713,109488734,+	21.5764	19.601
hsa-miR-3605-3p	29	178	178	21.34	19.38	1:hsa;hsa-mir-3605,33332458,33332480,-	21.3366	19.3832
hsa-miR-138-1-3p	12	178	178	21.34	19.38	3:hsa;hsa-mir-138-1,44114274,44114295,+	21.3366	19.3832
hsa-miR-590-3p	13	178	178	21.34	19.38	7:hsa;hsa-mir-590,74191253,74191273,+	21.3366	19.3832
hsa-miR-3117-3p	37	169	169	20.26	18.4	1:hsa;hsa-mir-3117,66628485,66628505,+	20.2578	18.4032
hsa-miR-1843	35	165	165	19.78	17.97	1:hsa;hsa-mir-1843,175968390,175968409,-	19.7784	17.9676
hsa-miR-382-3p	9	162	162	19.42	17.64	14:hsa;hsa-mir-382,101054352,101054372,+	19.4187	17.6409
hsa-miR-1185-2-3p	26	162	128	19.42	17.64	14:hsa;hsa-mir-1185-2,101044250,101044271,+	15.3432	13.9385
hsa-miR-502-3p	14	162	86.5	19.42	17.64	X:hsa;hsa-mir-502,50014649,50014670,+	10.3687	9.41937
hsa-miR-34b-5p	14	159	159	19.06	17.31	11:hsa;hsa-mir-34b,111512950,111512972,+	19.0591	17.3142
hsa-miR-2355-5p	33	157	157	18.82	17.1	2:hsa;hsa-mir-2355,207109997,207110017,-	18.8194	17.0964
hsa-miR-4677-3p	9	156	156	18.7	16.99	1:hsa;hsa-mir-4677,243346225,243346246,+	18.6995	16.9875
hsa-miR-548o-3p	8	155	77.5	18.58	16.88	7:hsa;hsa-mir-548o,102405828,102405849,-	9.28983	8.43932
hsa-miR-548o-3p	8	155	77.5	18.58	16.88	20:hsa;hsa-mir-548o-2,38516607,38516628,+	9.28983	8.43932
hsa-miR-549a-3p	18	155	155	18.58	16.88	15:hsa;hsa-mir-549a,80842038,80842058,-	18.5797	16.8786
hsa-let-7f-2-3p	7	154	154	18.46	16.77	X:hsa;hsa-let-7f-2,53557249,53557270,-	18.4598	16.7697
hsa-miR-7977	8	154	154	18.46	16.77	3:hsa;hsa-mir-7977,176515103,176515120,+	18.4598	16.7697
hsa-miR-433-3p	26	152	152	18.22	16.55	14:hsa;hsa-mir-433,100881949,100881970,+	18.2201	16.552
hsa-miR-374b-3p	10	150	150	17.98	16.33	X:hsa;hsa-mir-374b,74218587,74218608,-	17.9803	16.3342
hsa-miR-148a-5p	11	149	149	17.86	16.23	7:hsa;hsa-mir-148a,25949924,25949945,-	17.8604	16.2253
hsa-miR-3909	14	149	149	17.86	16.23	22:hsa;hsa-mir-3909,35335710,35335731,+	17.8604	16.2253
hsa-miR-196a-3p	12	144	144	17.26	15.68	12:hsa;hsa-mir-196a-2,53991799,53991820,+	17.2611	15.6808
hsa-miR-191-3p	17	143	143	17.14	15.57	3:hsa;hsa-mir-191,49020675,49020696,-	17.1412	15.5719
hsa-miR-877-5p	32	141	141	16.9	15.35	6:hsa;hsa-mir-877,30584332,30584351,+	16.9015	15.3541
hsa-miR-625-5p	9	140	140	16.78	15.25	14:hsa;hsa-mir-625,65471116,65471136,+	16.7816	15.2452
hsa-miR-598-3p	17	137	137	16.42	14.92	8:hsa;hsa-mir-598,11035266,11035287,-	16.422	14.9185
hsa-miR-425-3p	30	135	135	16.18	14.7	3:hsa;hsa-mir-425,49020202,49020223,-	16.1823	14.7007
hsa-miR-652-3p	20	131	131	15.7	14.27	X:hsa;hsa-mir-652,110055389,110055409,+	15.7028	14.2652
hsa-miR-212-5p	15	128	128	15.34	13.94	17:hsa;hsa-mir-212,2050301,2050323,-	15.3432	13.9385
hsa-miR-195-5p	9	127	125.67	15.22	13.83	17:hsa;hsa-mir-195,7017629,7017649,-	15.0635	13.6844
hsa-miR-339-5p	14	126	126	15.1	13.72	7:hsa;hsa-mir-339,1022947,1022969,-	15.1035	13.7207
hsa-miR-324-3p	29	124	124	14.86	13.5	17:hsa;hsa-mir-324,7223346,7223368,-	14.8637	13.5029
hsa-miR-128-1-5p	9	121	121	14.5	13.18	2:hsa;hsa-mir-128-1,135665411,135665433,+	14.5041	13.1762
hsa-miR-7974	8	120	120	14.38	13.07	19:hsa;hsa-mir-7974,11495599,11495622,-	14.3843	13.0673
hsa-miR-328-3p	25	117	117	14.02	12.74	16:hsa;hsa-mir-328,67202368,67202389,-	14.0246	12.7406
hsa-miR-542-5p	15	116	116	13.9	12.63	X:hsa;hsa-mir-542,134541356,134541378,-	13.9048	12.6318
hsa-miR-29b-1-5p	17	115	115	13.78	12.52	7:hsa;hsa-mir-29b-1,130877468,130877491,-	13.7849	12.5229
hsa-miR-380-3p	7	115	115	13.78	12.52	14:hsa;hsa-mir-380,101025056,101025077,+	13.7849	12.5229
hsa-miR-379-5p	17	115	115	13.78	12.52	14:hsa;hsa-mir-379,101022071,101022091,+	13.7849	12.5229
hsa-miR-942-5p	20	115	115	13.78	12.52	1:hsa;hsa-mir-942,117094655,117094676,+	13.7849	12.5229
hsa-miR-1185-5p	4	114	57	13.67	12.41	14:hsa;hsa-mir-1185-2,101044212,101044232,+	6.83252	6.20698
hsa-miR-1185-5p	4	114	57	13.67	12.41	14:hsa;hsa-mir-1185-1,101042991,101043011,+	6.83252	6.20698
hsa-miR-18a-5p	13	113	106	13.55	12.31	13:hsa;hsa-mir-18a,91350756,91350778,+	12.7061	11.5428
hsa-miR-340-3p	16	113	113	13.55	12.31	5:hsa;hsa-mir-340,180015360,180015381,-	13.5452	12.3051
hsa-miR-376b-3p	14	110	109.33	13.19	11.98	14:hsa;hsa-mir-376b,101040497,101040518,+	13.1057	11.9058
hsa-miR-495-3p	15	107	107	12.83	11.65	14:hsa;hsa-mir-495,101033804,101033825,+	12.826	11.6517
hsa-miR-497-5p	8	107	107	12.83	11.65	17:hsa;hsa-mir-497,7017934,7017954,-	12.826	11.6517
hsa-miR-33b-5p	5	106	105.5	12.71	11.54	17:hsa;hsa-mir-33b,17813851,17813870,-	12.6462	11.4884
hsa-miR-1296-5p	22	103	103	12.35	11.22	10:hsa;hsa-mir-1296,63372972,63372993,-	12.3465	11.2161
hsa-miR-485-3p	16	101	101	12.11	11	14:hsa;hsa-mir-485,101055464,101055485,+	12.1067	10.9983
hsa-miR-505-3p	17	101	101	12.11	11	X:hsa;hsa-mir-505,139924198,139924219,-	12.1067	10.9983
hsa-miR-370-5p	17	100	100	11.99	10.89	14:hsa;hsa-mir-370,100911151,100911172,+	11.9869	10.8894
hsa-miR-766-3p	12	100	100	11.99	10.89	X:hsa;hsa-mir-766,119646802,119646823,-	11.9869	10.8894
hsa-miR-671-5p	23	100	100	11.99	10.89	7:hsa;hsa-mir-671,151238449,151238471,+	11.9869	10.8894
hsa-miR-337-5p	16	98	98	11.75	10.67	14:hsa;hsa-mir-337,100874515,100874535,+	11.7471	10.6717
hsa-miR-296-3p	28	98	98	11.75	10.67	20:hsa;hsa-mir-296,58817662,58817683,-	11.7471	10.6717
hsa-miR-12135	3	96	96	11.51	10.45	15:hsa;hsa-mir-12135,73299962,73299979,+	11.5074	10.4539
hsa-miR-146b-3p	14	93	93	11.15	10.13	10:hsa;hsa-mir-146b,102436557,102436578,+	11.1478	10.1272
hsa-miR-409-5p	17	92	92	11.03	10.02	14:hsa;hsa-mir-409,101065314,101065336,+	11.0279	10.0183
hsa-miR-3158-3p	15	91	45.5	10.91	9.91	10:hsa;hsa-mir-3158-2,101601466,101601487,-	5.45403	4.9547
hsa-miR-3158-3p	15	91	45.5	10.91	9.91	10:hsa;hsa-mir-3158-1,101601466,101601487,+	5.45403	4.9547
hsa-miR-32-5p	6	91	91	10.91	9.91	9:hsa;hsa-mir-32,109046234,109046255,-	10.9081	9.90939
hsa-miR-25-5p	8	90	90	10.79	9.8	7:hsa;hsa-mir-25,100093573,100093593,-	10.7882	9.8005
hsa-miR-215-5p	12	89	89	10.67	9.69	1:hsa;hsa-mir-215,220117879,220117899,-	10.6683	9.69161
hsa-miR-3605-5p	23	88	88	10.55	9.58	1:hsa;hsa-mir-3605,33332414,33332436,-	10.5485	9.58271
hsa-miR-887-5p	19	88	88	10.55	9.58	5:hsa;hsa-mir-887,15935191,15935211,+	10.5485	9.58271
hsa-miR-329-3p	38	86	43	10.31	9.36	14:hsa;hsa-mir-329-1,101026834,101026855,+	5.15436	4.68246
hsa-miR-4746-5p	15	86	86	10.31	9.36	19:hsa;hsa-mir-4746,4445987,4446009,+	10.3087	9.36492
hsa-miR-1197	3	86	86	10.31	9.36	14:hsa;hsa-mir-1197,101025620,101025640,+	10.3087	9.36492
hsa-miR-181b-3p	20	86	86	10.31	9.36	1:hsa;hsa-mir-181b-1,198858948,198858968,-	10.3087	9.36492
hsa-miR-329-3p	38	86	43	10.31	9.36	14:hsa;hsa-mir-329-2,101027151,101027172,+	5.15436	4.68246
hsa-let-7e-3p	11	85	85	10.19	9.26	19:hsa;hsa-let-7e,51692838,51692859,+	10.1888	9.25603
hsa-miR-324-5p	19	85	85	10.19	9.26	17:hsa;hsa-mir-324,7223312,7223333,-	10.1888	9.25603
hsa-miR-93-3p	24	84	84	10.07	9.15	7:hsa;hsa-mir-93,100093817,100093838,-	10.069	9.14713
hsa-miR-330-3p	34	79	79	9.47	8.6	19:hsa;hsa-mir-330,45639050,45639072,-	9.46963	8.60266
hsa-miR-656-3p	11	78	78	9.35	8.49	14:hsa;hsa-mir-656,101066766,101066786,+	9.34977	8.49377
hsa-miR-659-5p	12	76	76	9.11	8.28	22:hsa;hsa-mir-659,37847699,37847720,-	9.11003	8.27598
hsa-miR-550a-5p	19	75	37.33	8.99	8.17	7:hsa;hsa-mir-550a-2,32733002,32733024,+	4.4751	4.06539
hsa-miR-550a-5p	19	75	37.33	8.99	8.17	7:hsa;hsa-mir-550a-1,30289815,30289837,+	4.4751	4.06539
hsa-miR-7-1-3p	16	74	74	8.87	8.06	9:hsa;hsa-mir-7-1,83969813,83969834,-	8.87029	8.05819
hsa-miR-101-5p	9	74	74	8.87	8.06	1:hsa;hsa-mir-101-1,65058444,65058465,-	8.87029	8.05819
hsa-miR-1271-5p	14	74	74	8.87	8.06	5:hsa;hsa-mir-1271,176367960,176367981,+	8.87029	8.05819
hsa-miR-3661	22	71	71	8.51	7.73	5:hsa;hsa-mir-3661,134225777,134225798,+	8.51068	7.73151
hsa-miR-224-3p	21	71	71	8.51	7.73	X:hsa;hsa-mir-224,151958630,151958652,-	8.51068	7.73151
hsa-miR-501-3p	11	70	70	8.39	7.62	X:hsa;hsa-mir-501,50009772,50009793,+	8.39082	7.62261
hsa-miR-99a-3p	10	70	70	8.39	7.62	21:hsa;hsa-mir-99a,16539138,16539159,+	8.39082	7.62261
hsa-miR-4435	13	69	17.25	8.27	7.51	2:hsa;hsa-mir-4435-2,87629764,87629785,+	2.06774	1.87843
hsa-miR-4435	13	69	17.25	8.27	7.51	2:hsa;hsa-mir-4435-1,87629764,87629785,+	2.06774	1.87843
hsa-miR-4435	13	69	17.25	8.27	7.51	2:hsa;hsa-mir-4435-2,111321017,111321038,-	2.06774	1.87843
hsa-miR-4435	13	69	17.25	8.27	7.51	2:hsa;hsa-mir-4435-1,111321021,111321042,-	2.06774	1.87843
hsa-let-7b-3p	7	69	69	8.27	7.51	22:hsa;hsa-let-7b,46113745,46113766,+	8.27095	7.51372
hsa-miR-29c-5p	21	65	65	7.79	7.08	1:hsa;hsa-mir-29c,207801867,207801888,-	7.79147	7.07814
hsa-miR-365b-5p	20	63	63	7.55	6.86	17:hsa;hsa-mir-365b,31575439,31575460,+	7.55173	6.86035
hsa-miR-3912-3p	17	62	62	7.43	6.75	5:hsa;hsa-mir-3912,171386718,171386738,-	7.43187	6.75146
hsa-miR-190a-5p	8	62	62	7.43	6.75	15:hsa;hsa-mir-190a,62823971,62823992,+	7.43187	6.75146
hsa-miR-548e-3p	20	62	62	7.43	6.75	10:hsa;hsa-mir-548e,110988978,110988999,+	7.43187	6.75146
hsa-miR-2277-5p	11	60	60	7.19	6.53	5:hsa;hsa-mir-2277,93620713,93620736,-	7.19213	6.53367
hsa-miR-331-5p	21	58	58	6.95	6.32	12:hsa;hsa-mir-331,95308445,95308466,+	6.95239	6.31588
hsa-miR-15b-3p	11	58	58	6.95	6.32	3:hsa;hsa-mir-15b,160404645,160404666,+	6.95239	6.31588
hsa-miR-299-5p	8	57	57	6.83	6.21	14:hsa;hsa-mir-299,101023800,101023821,+	6.83252	6.20698
hsa-miR-3176	19	57	57	6.83	6.21	16:hsa;hsa-mir-3176,543336,543354,+	6.83252	6.20698
hsa-miR-486-3p	10	56	32	6.71	6.1	8:hsa;hsa-mir-486-1,41660486,41660506,-	3.8358	3.48462
hsa-miR-4521	9	55	55	6.59	5.99	17:hsa;hsa-mir-4521,8186948,8186969,+	6.59278	5.98919
hsa-miR-185-3p	12	53	53	6.35	5.77	22:hsa;hsa-mir-185,20033188,20033209,+	6.35305	5.77141
hsa-miR-1301-3p	20	53	53	6.35	5.77	2:hsa;hsa-mir-1301,25328687,25328710,-	6.35305	5.77141
hsa-miR-496	8	52	52	6.23	5.66	14:hsa;hsa-mir-496,101060628,101060649,+	6.23318	5.66251
hsa-miR-4326	7	52	52	6.23	5.66	20:hsa;hsa-mir-4326,63286818,63286837,+	6.23318	5.66251
hsa-miR-589-3p	14	51	51	6.11	5.55	7:hsa;hsa-mir-589,5495879,5495902,-	6.11331	5.55362
hsa-let-7i-3p	6	50	50	5.99	5.44	12:hsa;hsa-let-7i,62603747,62603768,+	5.99344	5.44472
hsa-miR-320c	19	49	11.92	5.87	5.34	18:hsa;hsa-mir-320c-2,24321716,24321735,+	1.42901	1.29818
hsa-miR-34a-3p	8	49	49	5.87	5.34	1:hsa;hsa-mir-34a,9151731,9151752,-	5.87357	5.33583
hsa-miR-31-3p	16	49	49	5.87	5.34	9:hsa;hsa-mir-31,21512158,21512179,-	5.87357	5.33583
hsa-miR-486-3p	6	48	24	5.75	5.23	8:hsa;hsa-mir-486-2,41660486,41660506,+	2.87685	2.61347
hsa-miR-664a-3p	10	47	47	5.63	5.12	1:hsa;hsa-mir-664a,220200586,220200608,-	5.63383	5.11804
hsa-miR-320c	18	47	11.25	5.63	5.12	18:hsa;hsa-mir-320c-1,21683559,21683578,+	1.34909	1.22558
hsa-miR-627-5p	7	47	47	5.63	5.12	15:hsa;hsa-mir-627,42199585,42199606,-	5.63383	5.11804
hsa-miR-320d	16	47	23.9	5.63	5.12	13:hsa;hsa-mir-320d-1,40727857,40727875,-	2.86543	2.6031
hsa-miR-183-5p	15	47	47	5.63	5.12	7:hsa;hsa-mir-183,129774931,129774952,-	5.63383	5.11804
hsa-miR-24-1-5p	13	46	46	5.51	5.01	9:hsa;hsa-mir-24-1,95086027,95086048,+	5.51396	5.00914
hsa-miR-3126-5p	8	46	46	5.51	5.01	2:hsa;hsa-mir-3126,69103691,69103712,+	5.51396	5.00914
hsa-miR-9903	12	45	45	5.39	4.9	8:hsa;hsa-mir-9903,98393695,98393716,-	5.3941	4.90025
hsa-miR-362-5p	7	45	45	5.39	4.9	X:hsa;hsa-mir-362,50008968,50008991,+	5.3941	4.90025
hsa-let-7g-3p	9	45	45	5.39	4.9	3:hsa;hsa-let-7g,52268339,52268359,-	5.3941	4.90025
hsa-miR-181b-2-3p	16	44	44	5.27	4.79	9:hsa;hsa-mir-181b-2,124693763,124693782,+	5.27423	4.79136
hsa-miR-5000-3p	10	43	43	5.15	4.68	2:hsa;hsa-mir-5000,75090873,75090894,+	5.15436	4.68246
hsa-miR-33a-5p	11	43	42.5	5.15	4.68	22:hsa;hsa-mir-33a,41900949,41900969,+	5.09442	4.62801
hsa-miR-5100	1	42	42	5.03	4.57	10:hsa;hsa-mir-5100,42997630,42997651,+	5.03449	4.57357
hsa-miR-26a-2-3p	3	42	42	5.03	4.57	12:hsa;hsa-mir-26a-2,57824660,57824681,-	5.03449	4.57357
hsa-miR-548e-5p	10	42	42	5.03	4.57	10:hsa;hsa-mir-548e,110988940,110988961,+	5.03449	4.57357
hsa-miR-3677-3p	4	40	40	4.79	4.36	16:hsa;hsa-mir-3677,2270751,2270772,+	4.79475	4.35578
hsa-miR-137-3p	20	40	40	4.79	4.36	1:hsa;hsa-mir-137,98046128,98046150,-	4.79475	4.35578
hsa-miR-134-3p	13	39	39	4.67	4.25	14:hsa;hsa-mir-134,101054732,101054754,+	4.67488	4.24688
hsa-miR-193a-5p	10	39	39	4.67	4.25	17:hsa;hsa-mir-193a,31560016,31560037,+	4.67488	4.24688
hsa-miR-616-5p	3	39	39	4.67	4.25	12:hsa;hsa-mir-616,57519178,57519199,-	4.67488	4.24688
hsa-miR-618	5	39	39	4.67	4.25	12:hsa;hsa-mir-618,80935751,80935773,-	4.67488	4.24688
hsa-miR-615-5p	9	38	38	4.56	4.14	12:hsa;hsa-mir-615,54033967,54033988,+	4.55501	4.13799
hsa-miR-378c	5	38	17.25	4.56	4.14	10:hsa;hsa-mir-378c,130962598,130962622,-	2.06774	1.87843
hsa-miR-10399-5p	6	38	38	4.56	4.14	7:hsa;hsa-mir-10399,139044100,139044120,-	4.55501	4.13799
hsa-miR-2467-5p	4	38	38	4.56	4.14	2:hsa;hsa-mir-2467,239351735,239351757,-	4.55501	4.13799
hsa-let-7f-1-3p	2	37	37	4.44	4.03	9:hsa;hsa-let-7f-1,94176409,94176430,+	4.43515	4.02909
hsa-miR-5699-5p	11	37	37	4.44	4.03	10:hsa;hsa-mir-5699,641698,641719,-	4.43515	4.02909
hsa-miR-6852-5p	19	36	36	4.32	3.92	9:hsa;hsa-mir-6852,35710681,35710701,-	4.31528	3.9202
hsa-miR-329-5p	7	36	18	4.32	3.92	14:hsa;hsa-mir-329-1,101026797,101026819,+	2.15764	1.9601
hsa-miR-219a-1-3p	11	36	36	4.32	3.92	6:hsa;hsa-mir-219a-1,33207896,33207917,+	4.31528	3.9202
hsa-miR-329-5p	7	36	18	4.32	3.92	14:hsa;hsa-mir-329-2,101027114,101027136,+	2.15764	1.9601
hsa-miR-34c-3p	11	35	35	4.2	3.81	11:hsa;hsa-mir-34c,111513484,111513505,+	4.19541	3.81131
hsa-miR-744-3p	8	35	35	4.2	3.81	17:hsa;hsa-mir-744,12081966,12081987,+	4.19541	3.81131
hsa-miR-142-5p	8	35	35	4.2	3.81	17:hsa;hsa-mir-142,58331247,58331267,-	4.19541	3.81131
hsa-miR-6500-3p	9	33	33	3.96	3.59	1:hsa;hsa-mir-6500,51060072,51060092,+	3.95567	3.59352
hsa-miR-539-5p	7	33	33	3.96	3.59	14:hsa;hsa-mir-539,101047329,101047350,+	3.95567	3.59352
hsa-miR-6716-3p	14	32	32	3.84	3.48	11:hsa;hsa-mir-6716,118644048,118644069,+	3.8358	3.48462
hsa-miR-550a-3p	12	32	10.67	3.84	3.48	7:hsa;hsa-mir-550a-2,32733041,32733062,+	1.2786	1.16154
hsa-miR-320d	10	32	9.57	3.84	3.48	X:hsa;hsa-mir-320d-2,140926201,140926219,-	1.14732	1.04228
hsa-miR-627-3p	5	32	32	3.84	3.48	15:hsa;hsa-mir-627,42199624,42199643,-	3.8358	3.48462
hsa-miR-200b-3p	7	32	32	3.84	3.48	1:hsa;hsa-mir-200b,1167160,1167181,+	3.8358	3.48462
hsa-miR-550a-3p	12	32	10.67	3.84	3.48	7:hsa;hsa-mir-550a-3,29680793,29680814,-	1.2786	1.16154
hsa-miR-10399-3p	6	32	32	3.84	3.48	7:hsa;hsa-mir-10399,139044137,139044157,-	3.8358	3.48462
hsa-miR-550a-3p	12	32	10.67	3.84	3.48	7:hsa;hsa-mir-550a-1,30289854,30289875,+	1.2786	1.16154
hsa-miR-433-5p	6	31	31	3.72	3.38	14:hsa;hsa-mir-433,100881897,100881918,+	3.71593	3.37573
hsa-miR-188-5p	7	31	31	3.72	3.38	X:hsa;hsa-mir-188,50003517,50003537,+	3.71593	3.37573
hsa-miR-218-1-3p	10	30	30	3.6	3.27	4:hsa;hsa-mir-218-1,20528342,20528363,+	3.59606	3.26683
hsa-miR-874-5p	9	30	30	3.6	3.27	5:hsa;hsa-mir-874,137647581,137647603,-	3.59606	3.26683
hsa-miR-758-5p	8	30	30	3.6	3.27	14:hsa;hsa-mir-758,101026034,101026055,+	3.59606	3.26683
hsa-let-7d-3p	5	29	29	3.48	3.16	9:hsa;hsa-let-7d,94178895,94178916,+	3.47619	3.15794
hsa-miR-32-3p	4	29	29	3.48	3.16	9:hsa;hsa-mir-32,109046275,109046296,-	3.47619	3.15794
hsa-miR-940	7	28	28	3.36	3.05	16:hsa;hsa-mir-940,2271806,2271826,+	3.35633	3.04904
hsa-miR-376a-2-5p	7	28	28	3.36	3.05	14:hsa;hsa-mir-376a-2,101040080,101040100,+	3.35633	3.04904
hsa-let-7a-2-3p	10	28	28	3.36	3.05	11:hsa;hsa-let-7a-2,122146571,122146592,-	3.35633	3.04904
hsa-miR-185-5p	7	27	27	3.24	2.94	22:hsa;hsa-mir-185,20033153,20033174,+	3.23646	2.94015
hsa-miR-3129-3p	10	27	27	3.24	2.94	2:hsa;hsa-mir-3129,189133082,189133103,-	3.23646	2.94015
hsa-miR-532-3p	7	27	27	3.24	2.94	X:hsa;hsa-mir-532,50003204,50003225,+	3.23646	2.94015
hsa-miR-193b-5p	13	25	25	3	2.72	16:hsa;hsa-mir-193b,14303980,14304001,+	2.99672	2.72236
hsa-miR-3129-5p	9	24	24	2.88	2.61	2:hsa;hsa-mir-3129,189133044,189133065,-	2.87685	2.61347
hsa-miR-5699-3p	9	24	24	2.88	2.61	10:hsa;hsa-mir-5699,641747,641768,-	2.87685	2.61347
hsa-miR-3613-5p	4	23	23	2.76	2.5	13:hsa;hsa-mir-3613,49996430,49996451,-	2.75698	2.50457
hsa-miR-33b-3p	4	23	23	2.76	2.5	17:hsa;hsa-mir-33b,17813889,17813910,-	2.75698	2.50457
hsa-miR-30b-3p	4	22	22	2.64	2.4	8:hsa;hsa-mir-30b,134800574,134800595,-	2.63711	2.39568
hsa-miR-26a-1-3p	3	22	22	2.64	2.4	3:hsa;hsa-mir-26a-1,37969452,37969473,+	2.63711	2.39568
hsa-miR-3913-5p	8	22	11	2.64	2.4	12:hsa;hsa-mir-3913-2,69584744,69584765,+	1.31856	1.19784
hsa-miR-3913-5p	8	22	11	2.64	2.4	12:hsa;hsa-mir-3913-1,69584744,69584765,-	1.31856	1.19784
hsa-miR-210-5p	2	22	22	2.64	2.4	11:hsa;hsa-mir-210,568116,568137,-	2.63711	2.39568
hsa-miR-655-5p	6	22	22	2.64	2.4	14:hsa;hsa-mir-655,101049572,101049593,+	2.63711	2.39568
hsa-miR-141-3p	3	21	21	2.52	2.29	12:hsa;hsa-mir-141,6964155,6964176,+	2.51724	2.28678
hsa-miR-326	4	21	21	2.52	2.29	11:hsa;hsa-mir-326,75335151,75335170,-	2.51724	2.28678
hsa-miR-2682-5p	6	21	21	2.52	2.29	1:hsa;hsa-mir-2682,98045264,98045286,-	2.51724	2.28678
hsa-miR-580-3p	6	21	21	2.52	2.29	5:hsa;hsa-mir-580,36147952,36147973,-	2.51724	2.28678
hsa-miR-770-5p	6	20	20	2.4	2.18	14:hsa;hsa-mir-770,100852409,100852431,+	2.39738	2.17789
hsa-miR-197-3p	4	20	20	2.4	2.18	1:hsa;hsa-mir-197,109598940,109598961,+	2.39738	2.17789
hsa-miR-342-5p	13	20	20	2.4	2.18	14:hsa;hsa-mir-342,100109673,100109693,+	2.39738	2.17789
hsa-miR-4454	5	20	20	2.4	2.18	4:hsa;hsa-mir-4454,163093576,163093595,-	2.39738	2.17789
hsa-miR-4636	8	20	20	2.4	2.18	5:hsa;hsa-mir-4636,9053825,9053846,-	2.39738	2.17789
hsa-miR-92a-1-5p	2	20	20	2.4	2.18	13:hsa;hsa-mir-92a-1,91351324,91351346,+	2.39738	2.17789
hsa-miR-655-3p	8	20	20	2.4	2.18	14:hsa;hsa-mir-655,101049610,101049631,+	2.39738	2.17789
hsa-miR-33a-3p	9	20	20	2.4	2.18	22:hsa;hsa-mir-33a,41900989,41901010,+	2.39738	2.17789
hsa-miR-3174	8	19	19	2.28	2.07	15:hsa;hsa-mir-3174,90006764,90006786,+	2.27751	2.06899
hsa-miR-154-3p	8	19	19	2.28	2.07	14:hsa;hsa-mir-154,101059805,101059826,+	2.27751	2.06899
hsa-miR-4645-3p	7	19	19	2.28	2.07	6:hsa;hsa-mir-4645,2854077,2854098,-	2.27751	2.06899
hsa-miR-2355-3p	9	19	19	2.28	2.07	2:hsa;hsa-mir-2355,207110040,207110061,-	2.27751	2.06899
hsa-miR-628-3p	9	19	19	2.28	2.07	15:hsa;hsa-mir-628,55373000,55373020,-	2.27751	2.06899
hsa-miR-664a-5p	11	18	18	2.16	1.96	1:hsa;hsa-mir-664a,220200548,220200571,-	2.15764	1.9601
hsa-miR-196b-3p	6	18	18	2.16	1.96	7:hsa;hsa-mir-196b,27169529,27169550,-	2.15764	1.9601
hsa-miR-3622a-5p	8	18	18	2.16	1.96	8:hsa;hsa-mir-3622a,27701690,27701711,+	2.15764	1.9601
hsa-miR-34b-3p	9	18	18	2.16	1.96	11:hsa;hsa-mir-34b,111512987,111513008,+	2.15764	1.9601
hsa-miR-548n	6	17	16.5	2.04	1.85	7:hsa;hsa-mir-548n,34940769,34940790,-	1.97784	1.79676
hsa-miR-769-3p	4	17	17	2.04	1.85	19:hsa;hsa-mir-769,46019000,46019022,+	2.03777	1.85121
hsa-miR-889-5p	2	17	17	2.04	1.85	14:hsa;hsa-mir-889,101047911,101047932,+	2.03777	1.85121
hsa-miR-18a-3p	4	17	17	2.04	1.85	13:hsa;hsa-mir-18a,91350797,91350819,+	2.03777	1.85121
hsa-miR-582-3p	6	17	17	2.04	1.85	5:hsa;hsa-mir-582,59703658,59703679,-	2.03777	1.85121
hsa-miR-488-3p	4	16	16	1.92	1.74	1:hsa;hsa-mir-488,177029414,177029434,-	1.9179	1.74231
hsa-miR-494-5p	6	16	16	1.92	1.74	14:hsa;hsa-mir-494,101029648,101029670,+	1.9179	1.74231
hsa-miR-629-5p	5	16	16	1.92	1.74	15:hsa;hsa-mir-629,70079393,70079413,-	1.9179	1.74231
hsa-miR-487a-5p	5	15	15	1.8	1.63	14:hsa;hsa-mir-487a,101052458,101052479,+	1.79803	1.63342
hsa-miR-3934-5p	9	15	15	1.8	1.63	6:hsa;hsa-mir-3934,33698152,33698173,+	1.79803	1.63342
hsa-miR-625-3p	11	15	15	1.8	1.63	14:hsa;hsa-mir-625,65471153,65471174,+	1.79803	1.63342
hsa-miR-483-3p	11	15	15	1.8	1.63	11:hsa;hsa-mir-483,2134181,2134201,-	1.79803	1.63342
hsa-miR-4662a-5p	2	14	14	1.68	1.52	8:hsa;hsa-mir-4662a,124821990,124822011,+	1.67816	1.52452
hsa-miR-4785	7	14	14	1.68	1.52	2:hsa;hsa-mir-4785,160407853,160407873,-	1.67816	1.52452
hsa-miR-937-3p	8	14	14	1.68	1.52	8:hsa;hsa-mir-937,143813007,143813028,-	1.67816	1.52452
hsa-miR-18b-5p	5	14	7	1.68	1.52	X:hsa;hsa-mir-18b,134170046,134170068,-	0.839082	0.762261
hsv1-miR-H4-3p	5	14	7	1.68	1.52	NC_001806;hsv1-mir-H4,470,491,-	0.839082	0.762261
hsa-miR-3928-3p	8	14	14	1.68	1.52	22:hsa;hsa-mir-3928,31160098,31160119,-	1.67816	1.52452
hsv1-miR-H4-3p	5	14	7	1.68	1.52	NC_001806;hsv1-mir-H4,125930,125951,+	0.839082	0.762261
hsa-miR-548al	8	14	14	1.68	1.52	11:hsa;hsa-mir-548al,74399301,74399322,+	1.67816	1.52452
hsv1-miR-H6-3p	11	13	6.5	1.56	1.42	NC_001806;hsv1-mir-H6,8025,8045,+	0.779147	0.707814
hsa-miR-7705	5	13	13	1.56	1.42	8:hsa;hsa-mir-7705,100702968,100702990,-	1.55829	1.41563
hsa-miR-3065-3p	4	13	13	1.56	1.42	17:hsa;hsa-mir-3065,81125926,81125948,+	1.55829	1.41563
hsv1-miR-H6-3p	11	13	6.5	1.56	1.42	NC_001806;hsv1-mir-H6,118370,118390,-	0.779147	0.707814
hsa-miR-651-5p	3	13	13	1.56	1.42	X:hsa;hsa-mir-651,8126980,8127001,+	1.55829	1.41563
hsa-miR-585-3p	7	13	13	1.56	1.42	5:hsa;hsa-mir-585,169263661,169263679,-	1.55829	1.41563
hsa-miR-5002-5p	9	13	13	1.56	1.42	3:hsa;hsa-mir-5002,124132949,124132972,+	1.55829	1.41563
hsa-miR-1276	3	13	13	1.56	1.42	15:hsa;hsa-mir-1276,85770507,85770526,-	1.55829	1.41563
hsa-miR-20a-3p	6	13	13	1.56	1.42	13:hsa;hsa-mir-20a,91351108,91351129,+	1.55829	1.41563
hsa-miR-130a-5p	6	13	13	1.56	1.42	11:hsa;hsa-mir-130a,57641212,57641233,+	1.55829	1.41563
hsa-miR-92b-5p	7	13	13	1.56	1.42	1:hsa;hsa-mir-92b,155195196,155195217,+	1.55829	1.41563
hsa-miR-186-3p	2	12	12	1.44	1.31	1:hsa;hsa-mir-186,71067684,71067705,-	1.43843	1.30673
hsa-miR-129-5p	5	12	6.5	1.44	1.31	11:hsa;hsa-mir-129-2,43581408,43581428,+	0.779147	0.707814
hsa-miR-4421	6	12	12	1.44	1.31	1:hsa;hsa-mir-4421,51059879,51059900,+	1.43843	1.30673
hsa-miR-1305	6	12	12	1.44	1.31	4:hsa;hsa-mir-1305,182169343,182169364,+	1.43843	1.30673
hsa-miR-545-5p	4	12	12	1.44	1.31	X:hsa;hsa-mir-545,74287128,74287149,-	1.43843	1.30673
hsa-miR-450a-2-3p	7	12	12	1.44	1.31	X:hsa;hsa-mir-450a-2,134540565,134540586,-	1.43843	1.30673
hsa-miR-3200-3p	3	12	12	1.44	1.31	22:hsa;hsa-mir-3200,30731610,30731631,+	1.43843	1.30673
hsa-miR-483-5p	7	12	12	1.44	1.31	11:hsa;hsa-mir-483,2134141,2134162,-	1.43843	1.30673
hsa-miR-1255a	4	12	12	1.44	1.31	4:hsa;hsa-mir-1255a,101330329,101330351,-	1.43843	1.30673
hsa-miR-1295a	8	12	12	1.44	1.31	1:hsa;hsa-mir-1295a,171101776,171101796,-	1.43843	1.30673
hsa-miR-548u	3	12	12	1.44	1.31	6:hsa;hsa-mir-548u,57390180,57390202,+	1.43843	1.30673
hsa-miR-6840-5p	7	12	12	1.44	1.31	7:hsa;hsa-mir-6840,100356656,100356679,+	1.43843	1.30673
hsa-miR-6514-5p	8	12	12	1.44	1.31	11:hsa;hsa-mir-6514,62792702,62792724,-	1.43843	1.30673
hsa-miR-1294	4	12	12	1.44	1.31	5:hsa;hsa-mir-1294,154347153,154347174,+	1.43843	1.30673
hsa-miR-6770-3p	5	11	1.22	1.32	1.2	16:hsa;hsa-mir-6770-2,14930859,14930879,+	0.146506	0.133093
hsa-miR-3691-5p	8	11	11	1.32	1.2	6:hsa;hsa-mir-3691,5148247,5148269,-	1.31856	1.19784
hsa-miR-133a-3p	3	11	5.5	1.32	1.2	20:hsa;hsa-mir-133a-2,62564970,62564991,+	0.659278	0.598919
hsa-miR-10401-3p	2	11	1.38	1.32	1.2	21:hsa;hsa-mir-10401,8433832,8433852,+	0.16482	0.14973
hsa-miR-10401-3p	2	11	1.38	1.32	1.2	21:hsa;hsa-mir-10401,8250807,8250827,+	0.16482	0.14973
hsa-miR-9-5p	4	11	3.67	1.32	1.2	5:hsa;hsa-mir-9-2,88666868,88666890,-	0.439519	0.39928
hsa-miR-10401-3p	2	11	1.38	1.32	1.2	GL000220.1:hsa;hsa-mir-10401,150006,150026,+	0.16482	0.14973
hsa-miR-6770-3p	5	11	1.22	1.32	1.2	16:hsa;hsa-mir-6770-2,18379390,18379410,-	0.146506	0.133093
hsa-miR-6770-3p	5	11	1.22	1.32	1.2	16:hsa;hsa-mir-6770-2,16329344,16329364,+	0.146506	0.133093
hsa-miR-10401-3p	2	11	1.38	1.32	1.2	KI270733.1:hsa;hsa-mir-10401,167966,167986,+	0.16482	0.14973
hsa-miR-6770-3p	5	11	1.22	1.32	1.2	16:hsa;hsa-mir-6770-3,16329344,16329364,+	0.146506	0.133093
hsa-miR-10401-3p	2	11	1.38	1.32	1.2	21:hsa;hsa-mir-10401,8206598,8206618,+	0.16482	0.14973
hsa-miR-7976	5	11	11	1.32	1.2	3:hsa;hsa-mir-7976,127587111,127587129,-	1.31856	1.19784
hsa-miR-9-5p	4	11	3.67	1.32	1.2	1:hsa;hsa-mir-9-1,156420356,156420378,-	0.439519	0.39928
hsa-miR-9-5p	4	11	3.67	1.32	1.2	15:hsa;hsa-mir-9-3,89368032,89368054,+	0.439519	0.39928
hsa-miR-6770-3p	5	11	1.22	1.32	1.2	16:hsa;hsa-mir-6770-3,14930859,14930879,+	0.146506	0.133093
hsa-miR-10401-3p	2	11	1.38	1.32	1.2	21:hsa;hsa-mir-10401,8389645,8389665,+	0.16482	0.14973
hsa-miR-6770-3p	5	11	1.22	1.32	1.2	16:hsa;hsa-mir-6770-1,14930859,14930879,+	0.146506	0.133093
hsa-miR-548ab	3	11	10.5	1.32	1.2	3:hsa;hsa-mir-548ab,103524043,103524064,-	1.25862	1.14339
hsa-miR-129-5p	4	11	5.5	1.32	1.2	7:hsa;hsa-mir-129-1,128207876,128207896,+	0.659278	0.598919
hsa-miR-541-5p	7	11	11	1.32	1.2	14:hsa;hsa-mir-541,101064504,101064528,+	1.31856	1.19784
hsa-miR-98-3p	2	11	11	1.32	1.2	X:hsa;hsa-mir-98,53556302,53556323,-	1.31856	1.19784
hsa-miR-2116-3p	6	11	11	1.32	1.2	15:hsa;hsa-mir-2116,59171233,59171253,-	1.31856	1.19784
hsa-miR-432-3p	2	11	11	1.32	1.2	14:hsa;hsa-mir-432,100884544,100884564,+	1.31856	1.19784
hsa-miR-10401-3p	2	11	1.38	1.32	1.2	GL000220.1:hsa;hsa-mir-10401,106034,106054,+	0.16482	0.14973
hsa-miR-6770-3p	5	11	1.22	1.32	1.2	16:hsa;hsa-mir-6770-1,18379390,18379410,-	0.146506	0.133093
hsa-miR-133a-3p	3	11	5.5	1.32	1.2	18:hsa;hsa-mir-133a-1,21825750,21825771,-	0.659278	0.598919
hsa-miR-6866-5p	4	11	11	1.32	1.2	17:hsa;hsa-mir-6866,40161938,40161960,+	1.31856	1.19784
hsa-miR-3167	6	11	11	1.32	1.2	11:hsa;hsa-mir-3167,126988511,126988532,-	1.31856	1.19784
hsa-miR-6770-3p	5	11	1.22	1.32	1.2	16:hsa;hsa-mir-6770-3,18379390,18379410,-	0.146506	0.133093
hsa-miR-29b-2-5p	3	11	11	1.32	1.2	1:hsa;hsa-mir-29b-2,207802453,207802474,-	1.31856	1.19784
hsa-miR-10401-3p	2	11	1.38	1.32	1.2	KI270733.1:hsa;hsa-mir-10401,122883,122903,+	0.16482	0.14973
hsa-miR-378d	4	11	3.75	1.32	1.2	8:hsa;hsa-mir-378d-2,93916043,93916062,-	0.449508	0.408354
hsa-miR-6770-3p	5	11	1.22	1.32	1.2	16:hsa;hsa-mir-6770-1,16329344,16329364,+	0.146506	0.133093
hsa-miR-378d	3	10	2.75	1.2	1.09	4:hsa;hsa-mir-378d-1,5923305,5923324,-	0.329639	0.29946
hsa-miR-195-3p	5	10	10	1.2	1.09	17:hsa;hsa-mir-195,7017667,7017688,-	1.19869	1.08894
hsa-miR-203a-3p	6	10	10	1.2	1.09	14:hsa;hsa-mir-203a,104117469,104117490,+	1.19869	1.08894
hsa-miR-3613-3p	2	10	10	1.2	1.09	13:hsa;hsa-mir-3613,49996467,49996490,-	1.19869	1.08894
hsa-miR-2110	9	10	10	1.2	1.09	10:hsa;hsa-mir-2110,114174112,114174133,-	1.19869	1.08894
hsa-let-7c-3p	3	10	10	1.2	1.09	21:hsa;hsa-let-7c,16539883,16539904,+	1.19869	1.08894
hsa-miR-5010-3p	6	10	10	1.2	1.09	17:hsa;hsa-mir-5010,42514267,42514288,+	1.19869	1.08894
hsa-miR-23b-5p	4	10	10	1.2	1.09	9:hsa;hsa-mir-23b,95085227,95085248,+	1.19869	1.08894
hsa-miR-6837-3p	2	9	9	1.08	0.98	7:hsa;hsa-mir-6837,44051807,44051829,+	1.07882	0.98005
hsa-miR-500a-5p	4	9	5.5	1.08	0.98	X:hsa;hsa-mir-500a,50008443,50008465,+	0.659278	0.598919
hsa-miR-5695	6	9	9	1.08	0.98	19:hsa;hsa-mir-5695,12920373,12920394,+	1.07882	0.98005
hsa-miR-1228-3p	3	9	9	1.08	0.98	12:hsa;hsa-mir-1228,57194555,57194574,+	1.07882	0.98005
hsa-miR-190a-3p	2	9	9	1.08	0.98	15:hsa;hsa-mir-190a,62824008,62824028,+	1.07882	0.98005
hsa-miR-548l	2	9	9	1.08	0.98	11:hsa;hsa-mir-548l,94466509,94466530,-	1.07882	0.98005
hsa-miR-381-5p	4	9	9	1.08	0.98	14:hsa;hsa-mir-381,101045927,101045948,+	1.07882	0.98005
hsa-miR-3177-3p	4	9	9	1.08	0.98	16:hsa;hsa-mir-3177,1735038,1735058,+	1.07882	0.98005
hsa-miR-301a-5p	2	9	9	1.08	0.98	17:hsa;hsa-mir-301a,59151149,59151170,-	1.07882	0.98005
hsa-miR-1270	2	9	9	1.08	0.98	19:hsa;hsa-mir-1270,20399284,20399306,-	1.07882	0.98005
hsa-miR-1278	6	9	9	1.08	0.98	1:hsa;hsa-mir-1278,193136552,193136573,+	1.07882	0.98005
hsa-miR-1322	3	9	9	1.08	0.98	8:hsa;hsa-mir-1322,10825423,10825441,-	1.07882	0.98005
hsa-miR-23c	7	9	7	1.08	0.98	X:hsa;hsa-mir-23c,20017153,20017174,-	0.839082	0.762261
hsa-miR-4768-5p	5	8	8	0.96	0.87	X:hsa;hsa-mir-4768,17425889,17425910,+	0.95895	0.871156
hsa-miR-1306-3p	4	8	8	0.96	0.87	22:hsa;hsa-mir-1306,20086112,20086129,+	0.95895	0.871156
hsa-miR-5001-3p	6	8	8	0.96	0.87	2:hsa;hsa-mir-5001,232550533,232550554,-	0.95895	0.871156
hsa-miR-1304-5p	6	8	8	0.96	0.87	11:hsa;hsa-mir-1304,93733693,93733714,-	0.95895	0.871156
hsa-miR-147b-3p	4	8	8	0.96	0.87	15:hsa;hsa-mir-147b,45433098,45433118,+	0.95895	0.871156
hsa-miR-4473	5	8	8	0.96	0.87	9:hsa;hsa-mir-4473,20411204,20411225,-	0.95895	0.871156
hsa-miR-1228-5p	3	8	8	0.96	0.87	12:hsa;hsa-mir-1228,57194504,57194524,+	0.95895	0.871156
hsa-miR-4767	6	8	8	0.96	0.87	X:hsa;hsa-mir-4767,7147869,7147891,+	0.95895	0.871156
hsa-miR-548s	3	8	8	0.96	0.87	2:hsa;hsa-mir-548s,11767495,11767517,+	0.95895	0.871156
hsa-miR-597-3p	6	8	8	0.96	0.87	8:hsa;hsa-mir-597,9741729,9741751,+	0.95895	0.871156
hsa-miR-3651	5	8	8	0.96	0.87	9:hsa;hsa-mir-3651,92292521,92292544,-	0.95895	0.871156
hsa-miR-541-3p	3	8	8	0.96	0.87	14:hsa;hsa-mir-541,101064548,101064569,+	0.95895	0.871156
hsa-miR-4762-5p	6	8	8	0.96	0.87	22:hsa;hsa-mir-4762,45760532,45760552,+	0.95895	0.871156
hsa-miR-502-5p	6	8	8	0.96	0.87	X:hsa;hsa-mir-502,50014613,50014633,+	0.95895	0.871156
hsa-miR-376c-5p	4	8	4.5	0.96	0.87	14:hsa;hsa-mir-376c,101039694,101039714,+	0.53941	0.490025
hsa-miR-3064-5p	6	8	8	0.96	0.87	17:hsa;hsa-mir-3064,64500776,64500796,-	0.95895	0.871156
hsa-miR-582-5p	4	8	8	0.96	0.87	5:hsa;hsa-mir-582,59703621,59703643,-	0.95895	0.871156
hsa-miR-3939	1	7	7	0.84	0.76	6:hsa;hsa-mir-3939,166997868,166997889,-	0.839082	0.762261
hsa-miR-4424	1	7	7	0.84	0.76	1:hsa;hsa-mir-4424,178677763,178677784,+	0.839082	0.762261
hsa-miR-643	2	7	7	0.84	0.76	19:hsa;hsa-mir-643,52281857,52281878,+	0.839082	0.762261
hsa-miR-6505-5p	2	7	7	0.84	0.76	12:hsa;hsa-mir-6505,48132800,48132821,+	0.839082	0.762261
hsa-miR-624-5p	3	7	7	0.84	0.76	14:hsa;hsa-mir-624,31014661,31014682,-	0.839082	0.762261
hsa-miR-10527-5p	3	7	7	0.84	0.76	12:hsa;hsa-mir-10527,63823663,63823685,+	0.839082	0.762261
hsa-miR-500b-5p	3	7	3.5	0.84	0.76	X:hsa;hsa-mir-500b,50010682,50010699,+	0.419541	0.381131
hsa-miR-548j-5p	4	7	7	0.84	0.76	22:hsa;hsa-mir-548j,26555240,26555261,-	0.839082	0.762261
hsa-miR-375-3p	2	7	7	0.84	0.76	2:hsa;hsa-mir-375,219001684,219001705,-	0.839082	0.762261
hsa-miR-376b-5p	3	7	3.5	0.84	0.76	14:hsa;hsa-mir-376b,101040459,101040480,+	0.419541	0.381131
hsa-miR-320e	5	7	7	0.84	0.76	19:hsa;hsa-mir-320e,46709325,46709342,-	0.839082	0.762261
hsa-miR-362-3p	4	7	7	0.84	0.76	X:hsa;hsa-mir-362,50009005,50009026,+	0.839082	0.762261
hsa-miR-2116-5p	4	7	7	0.84	0.76	15:hsa;hsa-mir-2116,59171196,59171216,-	0.839082	0.762261
hsa-miR-499a-5p	3	7	7	0.84	0.76	20:hsa;hsa-mir-499a,34990408,34990428,+	0.839082	0.762261
hsa-miR-4717-3p	7	7	7	0.84	0.76	16:hsa;hsa-mir-4717,2274661,2274681,+	0.839082	0.762261
hsa-miR-6892-5p	5	7	7	0.84	0.76	7:hsa;hsa-mir-6892,143382686,143382706,+	0.839082	0.762261
hsa-miR-3180-3p	3	6	0.46	0.72	0.65	16:hsa;hsa-mir-3180-5,2136012,2136033,-	0.0553241	0.050259
hsa-miR-3180	3	6	0.46	0.72	0.65	16:hsa;hsa-mir-3180-5,2136012,2136030,-	0.0553241	0.050259
hsa-miR-3180-3p	3	6	0.46	0.72	0.65	16:hsa;hsa-mir-3180-2,14911281,14911302,+	0.0553241	0.050259
hsa-miR-3681-5p	3	6	6	0.72	0.65	2:hsa;hsa-mir-3681,12199138,12199159,+	0.719213	0.653367
hsa-miR-3180-3p	3	6	0.46	0.72	0.65	16:hsa;hsa-mir-3180-2,18402237,18402258,-	0.0553241	0.050259
hsa-miR-3180-3p	3	6	0.46	0.72	0.65	16:hsa;hsa-mir-3180-1,14911281,14911302,+	0.0553241	0.050259
hsa-miR-3180-3p	3	6	0.46	0.72	0.65	16:hsa;hsa-mir-3180-1,16309936,16309957,+	0.0553241	0.050259
hsa-miR-3688-3p	4	6	3.5	0.72	0.65	4:hsa;hsa-mir-3688-1,159128861,159128882,-	0.419541	0.381131
hsa-miR-3180-3p	3	6	0.46	0.72	0.65	16:hsa;hsa-mir-3180-2,16309936,16309957,+	0.0553241	0.050259
hsa-miR-3180-3p	3	6	0.46	0.72	0.65	16:hsa;hsa-mir-3180-4,15154885,15154906,-	0.0553241	0.050259
hsa-miR-3180	3	6	0.46	0.72	0.65	16:hsa;hsa-mir-3180-4,15154885,15154903,-	0.0553241	0.050259
hsa-miR-3159	4	6	6	0.72	0.65	11:hsa;hsa-mir-3159,18387796,18387817,+	0.719213	0.653367
hsa-miR-4647	4	6	6	0.72	0.65	6:hsa;hsa-mir-4647,44254216,44254238,-	0.719213	0.653367
hsa-miR-3136-5p	5	6	6	0.72	0.65	3:hsa;hsa-mir-3136,69048967,69048989,-	0.719213	0.653367
hsa-miR-296-5p	3	6	6	0.72	0.65	20:hsa;hsa-mir-296,58817628,58817648,-	0.719213	0.653367
hsv1-miR-H2-3p	3	6	3	0.72	0.65	NC_001806;hsv1-mir-H2,4519,4542,-	0.359606	0.326683
hsa-miR-939-5p	6	6	6	0.72	0.65	8:hsa;hsa-mir-939,144394163,144394186,-	0.719213	0.653367
hsa-miR-9901	4	6	6	0.72	0.65	16:hsa;hsa-mir-9901,34163601,34163621,+	0.719213	0.653367
hsa-miR-4786-5p	6	6	6	0.72	0.65	2:hsa;hsa-mir-4786,239943025,239943046,-	0.719213	0.653367
hsa-miR-5683	2	6	6	0.72	0.65	6:hsa;hsa-mir-5683,6169343,6169366,+	0.719213	0.653367
hsa-miR-449c-5p	4	6	6	0.72	0.65	5:hsa;hsa-mir-449c,55172278,55172302,-	0.719213	0.653367
hsa-miR-5588-5p	3	6	6	0.72	0.65	3:hsa;hsa-mir-5588,185253210,185253230,-	0.719213	0.653367
hsa-miR-6515-5p	3	6	6	0.72	0.65	19:hsa;hsa-mir-6515,12940486,12940506,+	0.719213	0.653367
hsa-miR-3180-3p	3	6	0.46	0.72	0.65	16:hsa;hsa-mir-3180-3,16309936,16309957,+	0.0553241	0.050259
hsa-miR-144-5p	1	6	6	0.72	0.65	17:hsa;hsa-mir-144,28861547,28861568,-	0.719213	0.653367
hsa-miR-200a-3p	3	6	6	0.72	0.65	1:hsa;hsa-mir-200a,1167916,1167937,+	0.719213	0.653367
hsa-miR-6720-5p	6	6	6	0.72	0.65	6:hsa;hsa-mir-6720,1390344,1390366,-	0.719213	0.653367
hsa-miR-6720-3p	2	6	6	0.72	0.65	6:hsa;hsa-mir-6720,1390380,1390401,-	0.719213	0.653367
hsa-miR-3180-3p	3	6	0.46	0.72	0.65	16:hsa;hsa-mir-3180-3,14911281,14911302,+	0.0553241	0.050259
hsv1-miR-H2-3p	3	6	3	0.72	0.65	NC_001806;hsv1-mir-H2,121873,121896,+	0.359606	0.326683
hsa-miR-3684	4	6	6	0.72	0.65	4:hsa;hsa-mir-3684,98997434,98997454,+	0.719213	0.653367
hsa-miR-6818-5p	2	6	6	0.72	0.65	22:hsa;hsa-mir-6818,30007054,30007075,+	0.719213	0.653367
hsa-miR-3180-3p	3	6	0.46	0.72	0.65	16:hsa;hsa-mir-3180-1,18402239,18402260,-	0.0553241	0.050259
hsa-miR-3180-3p	3	6	0.46	0.72	0.65	16:hsa;hsa-mir-3180-3,18402239,18402260,-	0.0553241	0.050259
hsa-miR-1262	5	6	6	0.72	0.65	1:hsa;hsa-mir-1262,68183531,68183552,-	0.719213	0.653367
hsa-miR-6859-5p	4	5	0.31	0.6	0.54	1:hsa;hsa-mir-6859-2,187896,187918,-	0.037459	0.0340295
hsa-miR-556-5p	2	5	5	0.6	0.54	1:hsa;hsa-mir-556,162342561,162342582,+	0.599344	0.544472
hsa-miR-6859-5p	4	5	0.31	0.6	0.54	16:hsa;hsa-mir-6859-4,17057,17079,-	0.037459	0.0340295
hsa-miR-153-5p	2	5	5	0.6	0.54	7:hsa;hsa-mir-153-2,157574350,157574371,-	0.599344	0.544472
hsa-miR-10b-3p	4	5	5	0.6	0.54	2:hsa;hsa-mir-10b,176150368,176150389,+	0.599344	0.544472
hsa-miR-3130-5p	2	5	2.5	0.6	0.54	2:hsa;hsa-mir-3130-2,206783246,206783266,+	0.299672	0.272236
hsa-miR-3152-5p	4	5	5	0.6	0.54	9:hsa;hsa-mir-3152,18573316,18573337,+	0.599344	0.544472
hsa-miR-4466	3	5	5	0.6	0.54	6:hsa;hsa-mir-4466,156779682,156779699,-	0.599344	0.544472
hsa-miR-487b-5p	5	5	5	0.6	0.54	14:hsa;hsa-mir-487b,101046469,101046490,+	0.599344	0.544472
hsa-miR-501-5p	2	5	5	0.6	0.54	X:hsa;hsa-mir-501,50009735,50009756,+	0.599344	0.544472
hsa-miR-6859-5p	4	5	0.31	0.6	0.54	1:hsa;hsa-mir-6859-2,17374,17396,-	0.037459	0.0340295
hsa-miR-6859-5p	4	5	0.31	0.6	0.54	1:hsa;hsa-mir-6859-1,187896,187918,-	0.037459	0.0340295
hsa-miR-103a-2-5p	2	5	5	0.6	0.54	20:hsa;hsa-mir-103a-2,3917504,3917526,+	0.599344	0.544472
hsa-miR-3157-3p	3	5	5	0.6	0.54	10:hsa;hsa-mir-3157,96064372,96064393,-	0.599344	0.544472
hsa-miR-561-3p	2	5	5	0.6	0.54	2:hsa;hsa-mir-561,188297552,188297573,+	0.599344	0.544472
hsa-miR-122b-5p	4	5	5	0.6	0.54	18:hsa;hsa-mir-122b,58451089,58451111,-	0.599344	0.544472
hsa-miR-6868-3p	3	5	5	0.6	0.54	17:hsa;hsa-mir-6868,76098056,76098076,-	0.599344	0.544472
hsa-miR-6859-5p	4	5	0.31	0.6	0.54	1:hsa;hsa-mir-6859-3,17374,17396,-	0.037459	0.0340295
hsa-miR-6859-5p	4	5	0.31	0.6	0.54	15:hsa;hsa-mir-6859-4,101973529,101973551,+	0.037459	0.0340295
hsa-miR-3130-5p	2	5	2.5	0.6	0.54	2:hsa;hsa-mir-3130-1,206783246,206783266,-	0.299672	0.272236
hsa-miR-6859-5p	4	5	0.31	0.6	0.54	16:hsa;hsa-mir-6859-1,17057,17079,-	0.037459	0.0340295
hsa-miR-3127-5p	3	5	5	0.6	0.54	2:hsa;hsa-mir-3127,96798288,96798310,+	0.599344	0.544472
hsa-miR-6859-5p	4	5	0.31	0.6	0.54	15:hsa;hsa-mir-6859-1,101973529,101973551,+	0.037459	0.0340295
hsa-miR-6859-5p	4	5	0.31	0.6	0.54	16:hsa;hsa-mir-6859-2,17057,17079,-	0.037459	0.0340295
hsa-miR-585-5p	1	5	5	0.6	0.54	5:hsa;hsa-mir-585,169263625,169263646,-	0.599344	0.544472
hsa-miR-6859-5p	4	5	0.31	0.6	0.54	1:hsa;hsa-mir-6859-1,17374,17396,-	0.037459	0.0340295
hsa-miR-1291	4	5	5	0.6	0.54	12:hsa;hsa-mir-1291,48654457,48654480,-	0.599344	0.544472
hsa-miR-6859-5p	4	5	0.31	0.6	0.54	1:hsa;hsa-mir-6859-4,187896,187918,-	0.037459	0.0340295
hsa-miR-219a-5p	4	5	4	0.6	0.54	6:hsa;hsa-mir-219a-1,33207855,33207875,+	0.479475	0.435578
hsa-miR-6772-3p	5	5	5	0.6	0.54	16:hsa;hsa-mir-6772,57772329,57772351,-	0.599344	0.544472
hsa-miR-6859-5p	4	5	0.31	0.6	0.54	1:hsa;hsa-mir-6859-4,17374,17396,-	0.037459	0.0340295
hsa-miR-7-2-3p	4	5	5	0.6	0.54	15:hsa;hsa-mir-7-2,88611896,88611917,+	0.599344	0.544472
hsa-miR-642a-5p	2	5	5	0.6	0.54	19:hsa;hsa-mir-642a,45674943,45674964,+	0.599344	0.544472
hsa-miR-6859-5p	4	5	0.31	0.6	0.54	15:hsa;hsa-mir-6859-3,101973529,101973551,+	0.037459	0.0340295
hsa-miR-6859-5p	4	5	0.31	0.6	0.54	16:hsa;hsa-mir-6859-3,17057,17079,-	0.037459	0.0340295
hsa-miR-1538	4	5	5	0.6	0.54	16:hsa;hsa-mir-1538,69565846,69565868,-	0.599344	0.544472
hsa-miR-6859-5p	4	5	0.31	0.6	0.54	1:hsa;hsa-mir-6859-3,187896,187918,-	0.037459	0.0340295
hsa-miR-363-3p	4	5	5	0.6	0.54	X:hsa;hsa-mir-363,134169427,134169448,-	0.599344	0.544472
hsa-miR-3688-3p	3	5	2.5	0.6	0.54	4:hsa;hsa-mir-3688-2,159128861,159128882,+	0.299672	0.272236
hsa-miR-3943	2	5	5	0.6	0.54	7:hsa;hsa-mir-3943,43150917,43150939,+	0.599344	0.544472
hsa-miR-4474-3p	5	5	5	0.6	0.54	9:hsa;hsa-mir-4474,20502309,20502330,-	0.599344	0.544472
hsa-miR-6859-5p	4	5	0.31	0.6	0.54	15:hsa;hsa-mir-6859-2,101973529,101973551,+	0.037459	0.0340295
hsa-miR-6838-5p	2	5	5	0.6	0.54	7:hsa;hsa-mir-6838,44073383,44073404,-	0.599344	0.544472
hsa-miR-503-3p	3	5	5	0.6	0.54	X:hsa;hsa-mir-503,134546373,134546395,-	0.599344	0.544472
hsa-miR-4286	1	5	5	0.6	0.54	8:hsa;hsa-mir-4286,10666988,10667004,+	0.599344	0.544472
hsa-miR-579-5p	5	5	5	0.6	0.54	5:hsa;hsa-mir-579,32394402,32394423,-	0.599344	0.544472
hsa-miR-3918	3	4	4	0.48	0.44	6:hsa;hsa-mir-3918,158764679,158764699,-	0.479475	0.435578
hsa-miR-570-3p	1	4	4	0.48	0.44	3:hsa;hsa-mir-570,195699460,195699481,+	0.479475	0.435578
hsa-miR-3611	3	4	4	0.48	0.44	10:hsa;hsa-mir-3611,35079649,35079669,-	0.479475	0.435578
hsa-miR-3609	2	4	4	0.48	0.44	7:hsa;hsa-mir-3609,98881700,98881723,+	0.479475	0.435578
hsa-miR-3128	4	4	4	0.48	0.44	2:hsa;hsa-mir-3128,177255949,177255971,-	0.479475	0.435578
hsa-miR-6516-3p	3	4	4	0.48	0.44	17:hsa;hsa-mir-6516,77089469,77089490,+	0.479475	0.435578
hsa-miR-652-5p	3	4	4	0.48	0.44	X:hsa;hsa-mir-652,110055349,110055373,+	0.479475	0.435578
hsa-miR-4677-5p	2	4	4	0.48	0.44	1:hsa;hsa-mir-4677,243346188,243346209,+	0.479475	0.435578
hsa-miR-378g	3	4	4	0.48	0.44	1:hsa;hsa-mir-378g,94745861,94745880,-	0.479475	0.435578
hsa-miR-449a	2	4	4	0.48	0.44	5:hsa;hsa-mir-449a,55170547,55170568,-	0.479475	0.435578
hsa-miR-4766-3p	3	4	4	0.48	0.44	22:hsa;hsa-mir-4766,40813928,40813948,-	0.479475	0.435578
hsa-miR-490-5p	3	4	4	0.48	0.44	7:hsa;hsa-mir-490,136903205,136903224,+	0.479475	0.435578
hsa-miR-548j-3p	3	4	4	0.48	0.44	22:hsa;hsa-mir-548j,26555276,26555296,-	0.479475	0.435578
hsa-miR-323a-5p	4	4	4	0.48	0.44	14:hsa;hsa-mir-323a,101025747,101025768,+	0.479475	0.435578
hsa-miR-3065-5p	4	4	4	0.48	0.44	17:hsa;hsa-mir-3065,81125886,81125908,+	0.479475	0.435578
hsa-miR-4761-3p	3	4	4	0.48	0.44	22:hsa;hsa-mir-4761,19963814,19963834,+	0.479475	0.435578
hsa-miR-545-3p	3	4	4	0.48	0.44	X:hsa;hsa-mir-545,74287166,74287187,-	0.479475	0.435578
hsa-miR-2277-3p	4	4	4	0.48	0.44	5:hsa;hsa-mir-2277,93620754,93620774,-	0.479475	0.435578
hsa-miR-4661-5p	4	4	4	0.48	0.44	8:hsa;hsa-mir-4661,91205494,91205515,+	0.479475	0.435578
hsa-miR-380-5p	2	4	4	0.48	0.44	14:hsa;hsa-mir-380,101025021,101025042,+	0.479475	0.435578
hsa-miR-1343-3p	3	4	4	0.48	0.44	11:hsa;hsa-mir-1343,34941888,34941909,+	0.479475	0.435578
hsa-miR-1179	2	4	4	0.48	0.44	15:hsa;hsa-mir-1179,88608121,88608141,+	0.479475	0.435578
hsa-miR-1245a	3	4	4	0.48	0.44	2:hsa;hsa-mir-1245a,188978136,188978156,+	0.479475	0.435578
hsa-miR-1908-5p	3	4	4	0.48	0.44	11:hsa;hsa-mir-1908,61815172,61815192,-	0.479475	0.435578
hsa-miR-1245b-5p	3	4	4	0.48	0.44	2:hsa;hsa-mir-1245b,188978101,188978121,-	0.479475	0.435578
hsa-miR-10395-3p	2	4	4	0.48	0.44	19:hsa;hsa-mir-10395,12703644,12703664,-	0.479475	0.435578
hsa-miR-1267	3	4	4	0.48	0.44	13:hsa;hsa-mir-1267,107531182,107531202,-	0.479475	0.435578
hsa-miR-2114-5p	1	4	4	0.48	0.44	X:hsa;hsa-mir-2114,150228016,150228037,+	0.479475	0.435578
hsa-miR-2114-3p	3	4	4	0.48	0.44	X:hsa;hsa-mir-2114,150228052,150228072,+	0.479475	0.435578
hsa-miR-505-5p	1	4	4	0.48	0.44	X:hsa;hsa-mir-505,139924162,139924183,-	0.479475	0.435578
hsa-miR-491-5p	4	4	4	0.48	0.44	9:hsa;hsa-mir-491,20716120,20716141,+	0.479475	0.435578
hsa-miR-943	4	4	4	0.48	0.44	4:hsa;hsa-mir-943,1986438,1986458,-	0.479475	0.435578
hsa-miR-137-5p	2	4	4	0.48	0.44	1:hsa;hsa-mir-137,98046092,98046114,-	0.479475	0.435578
hsa-miR-410-5p	1	4	4	0.48	0.44	14:hsa;hsa-mir-410,101065925,101065945,+	0.479475	0.435578
hsa-miR-4757-3p	4	4	4	0.48	0.44	2:hsa;hsa-mir-4757,19348476,19348497,+	0.479475	0.435578
hsa-miR-551b-3p	1	3	3	0.36	0.33	3:hsa;hsa-mir-551b,168551914,168551934,+	0.359606	0.326683
hsa-miR-3145-3p	2	3	3	0.36	0.33	6:hsa;hsa-mir-3145,138435261,138435284,-	0.359606	0.326683
hsa-miR-1284	2	3	3	0.36	0.33	3:hsa;hsa-mir-1284,71541999,71542020,-	0.359606	0.326683
hsa-miR-5091	2	3	3	0.36	0.33	4:hsa;hsa-mir-5091,13627875,13627897,+	0.359606	0.326683
hsa-miR-6836-5p	2	3	3	0.36	0.33	7:hsa;hsa-mir-6836,2257520,2257541,-	0.359606	0.326683
hsa-miR-6511b-5p	3	3	0.15	0.36	0.33	16:hsa;hsa-mir-6511b-1,15134076,15134099,-	0.0179803	0.0163342
hsa-miR-3138	3	3	3	0.36	0.33	4:hsa;hsa-mir-3138,10078658,10078681,-	0.359606	0.326683
hsa-miR-4788	2	3	3	0.36	0.33	3:hsa;hsa-mir-4788,134437836,134437857,+	0.359606	0.326683
hsa-miR-4714-3p	3	3	3	0.36	0.33	15:hsa;hsa-mir-4714,98784473,98784494,+	0.359606	0.326683
hsa-miR-3116	1	3	1.5	0.36	0.33	1:hsa;hsa-mir-3116-1,62078830,62078851,+	0.179803	0.163342
hsa-miR-7156-5p	2	3	3	0.36	0.33	1:hsa;hsa-mir-7156,77060143,77060165,+	0.359606	0.326683
hsa-miR-6511b-5p	3	3	0.15	0.36	0.33	16:hsa;hsa-mir-6511b-1,2106679,2106702,-	0.0179803	0.0163342
hsa-miR-6511a-5p	3	3	0.15	0.36	0.33	16:hsa;hsa-mir-6511a-2,14925941,14925963,+	0.0179803	0.0163342
hsa-miR-6511a-3p	3	3	0.19	0.36	0.33	16:hsa;hsa-mir-6511a-2,14925980,14926001,+	0.0224754	0.0204177
hsa-miR-4510	2	3	1.5	0.36	0.33	15:hsa;hsa-mir-4510,35926863,35926884,+	0.179803	0.163342
hsa-miR-624-3p	2	3	3	0.36	0.33	14:hsa;hsa-mir-624,31014699,31014719,-	0.359606	0.326683
hsa-miR-573	3	3	3	0.36	0.33	4:hsa;hsa-mir-573,24520207,24520230,-	0.359606	0.326683
hsa-miR-1249-3p	3	3	3	0.36	0.33	22:hsa;hsa-mir-1249,45200994,45201015,-	0.359606	0.326683
hsa-miR-6511a-5p	3	3	0.15	0.36	0.33	16:hsa;hsa-mir-6511a-1,14925941,14925963,+	0.0179803	0.0163342
hsa-miR-6511a-3p	3	3	0.19	0.36	0.33	16:hsa;hsa-mir-6511a-1,14925980,14926001,+	0.0224754	0.0204177
hsa-miR-6511a-5p	3	3	0.15	0.36	0.33	16:hsa;hsa-mir-6511a-3,16368880,16368902,+	0.0179803	0.0163342
hsa-miR-6511a-3p	3	3	0.19	0.36	0.33	16:hsa;hsa-mir-6511a-3,16368919,16368940,+	0.0224754	0.0204177
hsa-miR-6764-3p	2	3	3	0.36	0.33	14:hsa;hsa-mir-6764,100277397,100277417,+	0.359606	0.326683
hsa-miR-495-5p	2	3	3	0.36	0.33	14:hsa;hsa-mir-495,101033768,101033789,+	0.359606	0.326683
hsa-miR-6511a-5p	3	3	0.15	0.36	0.33	16:hsa;hsa-mir-6511a-3,16324592,16324614,+	0.0179803	0.0163342
hsa-miR-6511a-3p	3	3	0.19	0.36	0.33	16:hsa;hsa-mir-6511a-3,16324631,16324652,+	0.0224754	0.0204177
hsa-miR-205-5p	2	3	3	0.36	0.33	1:hsa;hsa-mir-205,209432166,209432187,+	0.359606	0.326683
hsa-miR-1277-3p	3	3	3	0.36	0.33	X:hsa;hsa-mir-1277,118386440,118386461,+	0.359606	0.326683
hsa-miR-6511a-5p	3	3	0.15	0.36	0.33	16:hsa;hsa-mir-6511a-1,16324592,16324614,+	0.0179803	0.0163342
hsa-miR-6511a-3p	3	3	0.19	0.36	0.33	16:hsa;hsa-mir-6511a-1,16324631,16324652,+	0.0224754	0.0204177
hsa-miR-6511a-5p	3	3	0.15	0.36	0.33	16:hsa;hsa-mir-6511a-1,18344017,18344039,-	0.0179803	0.0163342
hsa-miR-6511a-3p	3	3	0.19	0.36	0.33	16:hsa;hsa-mir-6511a-1,18344056,18344077,-	0.0224754	0.0204177
hsa-miR-5587-3p	2	3	3	0.36	0.33	16:hsa;hsa-mir-5587,535348,535368,+	0.359606	0.326683
hsa-miR-4742-3p	3	3	3	0.36	0.33	1:hsa;hsa-mir-4742,224398289,224398311,-	0.359606	0.326683
hsa-miR-6511a-5p	3	3	0.15	0.36	0.33	16:hsa;hsa-mir-6511a-4,16368880,16368902,+	0.0179803	0.0163342
hsa-miR-6511a-3p	3	3	0.19	0.36	0.33	16:hsa;hsa-mir-6511a-4,16368919,16368940,+	0.0224754	0.0204177
hsa-miR-548ay-3p	3	3	3	0.36	0.33	3:hsa;hsa-mir-548ay,32506346,32506367,-	0.359606	0.326683
hsa-miR-338-3p	3	3	3	0.36	0.33	17:hsa;hsa-mir-338,81125924,81125945,-	0.359606	0.326683
hsa-miR-3173-5p	1	3	3	0.36	0.33	14:hsa;hsa-mir-3173,95137923,95137944,-	0.359606	0.326683
hsa-miR-656-5p	2	3	3	0.36	0.33	14:hsa;hsa-mir-656,101066731,101066751,+	0.359606	0.326683
hsa-miR-1245b-3p	2	3	3	0.36	0.33	2:hsa;hsa-mir-1245b,188978134,188978155,-	0.359606	0.326683
hsa-miR-6513-5p	3	3	3	0.36	0.33	2:hsa;hsa-mir-6513,218280127,218280149,-	0.359606	0.326683
hsa-miR-6513-3p	3	3	3	0.36	0.33	2:hsa;hsa-mir-6513,218280166,218280186,-	0.359606	0.326683
hsa-miR-6511a-5p	3	3	0.15	0.36	0.33	16:hsa;hsa-mir-6511a-3,14925941,14925963,+	0.0179803	0.0163342
hsa-miR-6511a-3p	3	3	0.19	0.36	0.33	16:hsa;hsa-mir-6511a-3,14925980,14926001,+	0.0224754	0.0204177
hsa-miR-6511a-5p	3	3	0.15	0.36	0.33	16:hsa;hsa-mir-6511a-4,18344017,18344039,-	0.0179803	0.0163342
hsa-miR-6511a-3p	3	3	0.19	0.36	0.33	16:hsa;hsa-mir-6511a-4,18344056,18344077,-	0.0224754	0.0204177
hsa-miR-3935	3	3	3	0.36	0.33	16:hsa;hsa-mir-3935,56245577,56245598,+	0.359606	0.326683
hsa-miR-1247-5p	1	3	3	0.36	0.33	14:hsa;hsa-mir-1247,101560326,101560347,-	0.359606	0.326683
hsa-miR-5010-5p	1	3	3	0.36	0.33	17:hsa;hsa-mir-5010,42514208,42514229,+	0.359606	0.326683
hsa-miR-2682-3p	2	3	3	0.36	0.33	1:hsa;hsa-mir-2682,98045301,98045322,-	0.359606	0.326683
hsa-miR-6511b-5p	3	3	0.15	0.36	0.33	16:hsa;hsa-mir-6511b-2,2106683,2106706,-	0.0179803	0.0163342
hsa-miR-4797-3p	3	3	3	0.36	0.33	3:hsa;hsa-mir-4797,197293918,197293938,-	0.359606	0.326683
hsa-miR-412-3p	3	3	3	0.36	0.33	14:hsa;hsa-mir-412,101065500,101065522,+	0.359606	0.326683
hsa-miR-6511b-5p	3	3	0.15	0.36	0.33	16:hsa;hsa-mir-6511b-2,15134080,15134103,-	0.0179803	0.0163342
hsa-miR-3116	1	3	1.5	0.36	0.33	1:hsa;hsa-mir-3116-2,62078830,62078851,-	0.179803	0.163342
hsa-miR-6511a-5p	3	3	0.15	0.36	0.33	16:hsa;hsa-mir-6511a-4,14925941,14925963,+	0.0179803	0.0163342
hsa-miR-6511a-3p	3	3	0.19	0.36	0.33	16:hsa;hsa-mir-6511a-4,14925980,14926001,+	0.0224754	0.0204177
hsa-miR-4638-3p	2	3	3	0.36	0.33	5:hsa;hsa-mir-4638,181222600,181222622,-	0.359606	0.326683
hsa-miR-6511a-5p	3	3	0.15	0.36	0.33	16:hsa;hsa-mir-6511a-2,16368880,16368902,+	0.0179803	0.0163342
hsa-miR-6511a-3p	3	3	0.19	0.36	0.33	16:hsa;hsa-mir-6511a-2,16368919,16368940,+	0.0224754	0.0204177
hsa-miR-6511a-5p	3	3	0.15	0.36	0.33	16:hsa;hsa-mir-6511a-2,16324592,16324614,+	0.0179803	0.0163342
hsa-miR-6511a-3p	3	3	0.19	0.36	0.33	16:hsa;hsa-mir-6511a-2,16324631,16324652,+	0.0224754	0.0204177
hsa-miR-3677-5p	2	3	3	0.36	0.33	16:hsa;hsa-mir-3677,2270715,2270736,+	0.359606	0.326683
hsa-miR-16-1-3p	2	3	3	0.36	0.33	13:hsa;hsa-mir-16-1,50049028,50049049,-	0.359606	0.326683
hsa-miR-4660	3	3	3	0.36	0.33	8:hsa;hsa-mir-4660,9048453,9048475,+	0.359606	0.326683
hsa-miR-6511a-5p	3	3	0.15	0.36	0.33	16:hsa;hsa-mir-6511a-2,18344017,18344039,-	0.0179803	0.0163342
hsa-miR-6511a-3p	3	3	0.19	0.36	0.33	16:hsa;hsa-mir-6511a-2,18344056,18344077,-	0.0224754	0.0204177
hsa-miR-6511a-5p	3	3	0.15	0.36	0.33	16:hsa;hsa-mir-6511a-1,16368880,16368902,+	0.0179803	0.0163342
hsa-miR-6511a-3p	3	3	0.19	0.36	0.33	16:hsa;hsa-mir-6511a-1,16368919,16368940,+	0.0224754	0.0204177
hsa-miR-4671-3p	3	3	3	0.36	0.33	1:hsa;hsa-mir-4671,234306512,234306532,+	0.359606	0.326683
hsa-miR-3154	1	3	3	0.36	0.33	9:hsa;hsa-mir-3154,128245000,128245021,-	0.359606	0.326683
hsa-miR-1910-5p	2	3	3	0.36	0.33	16:hsa;hsa-mir-1910,85741632,85741652,-	0.359606	0.326683
hsa-miR-188-3p	2	3	3	0.36	0.33	X:hsa;hsa-mir-188,50003556,50003576,+	0.359606	0.326683
hsa-miR-584-3p	2	3	3	0.36	0.33	5:hsa;hsa-mir-584,149062367,149062388,-	0.359606	0.326683
hsa-miR-6875-5p	2	3	3	0.36	0.33	7:hsa;hsa-mir-6875,100868041,100868061,+	0.359606	0.326683
hsa-miR-6511a-5p	3	3	0.15	0.36	0.33	16:hsa;hsa-mir-6511a-3,18344017,18344039,-	0.0179803	0.0163342
hsa-miR-6511a-3p	3	3	0.19	0.36	0.33	16:hsa;hsa-mir-6511a-3,18344056,18344077,-	0.0224754	0.0204177
hsa-miR-142-3p	3	3	3	0.36	0.33	17:hsa;hsa-mir-142,58331283,58331305,-	0.359606	0.326683
hsa-miR-3916	2	3	3	0.36	0.33	1:hsa;hsa-mir-3916,247201986,247202011,-	0.359606	0.326683
hsa-miR-660-3p	3	3	3	0.36	0.33	X:hsa;hsa-mir-660,50013292,50013312,+	0.359606	0.326683
hsa-miR-6842-3p	1	3	3	0.36	0.33	8:hsa;hsa-mir-6842,27433413,27433434,+	0.359606	0.326683
hsa-miR-451a	2	3	3	0.36	0.33	17:hsa;hsa-mir-451a,28861385,28861406,-	0.359606	0.326683
hsa-miR-7703	1	3	3	0.36	0.33	14:hsa;hsa-mir-7703,24143543,24143565,-	0.359606	0.326683
hsa-miR-9986	2	3	3	0.36	0.33	2:hsa;hsa-mir-9986,132433731,132433750,+	0.359606	0.326683
hsa-miR-1252-5p	3	3	3	0.36	0.33	12:hsa;hsa-mir-1252,79419261,79419282,+	0.359606	0.326683
hsa-miR-6511a-5p	3	3	0.15	0.36	0.33	16:hsa;hsa-mir-6511a-4,16324592,16324614,+	0.0179803	0.0163342
hsa-miR-6511a-3p	3	3	0.19	0.36	0.33	16:hsa;hsa-mir-6511a-4,16324631,16324652,+	0.0224754	0.0204177
hsa-miR-1226-5p	2	2	2	0.24	0.22	3:hsa;hsa-mir-1226,47849555,47849580,+	0.239738	0.217789
hsa-miR-488-5p	1	2	2	0.24	0.22	1:hsa;hsa-mir-488,177029376,177029396,-	0.239738	0.217789
hsa-miR-7-5p	2	2	1.33	0.24	0.22	9:hsa;hsa-mir-7-1,83969771,83969794,-	0.159825	0.145193
hsa-miR-1306-5p	2	2	2	0.24	0.22	22:hsa;hsa-mir-1306,20086072,20086093,+	0.239738	0.217789
hsa-miR-6855-3p	2	2	2	0.24	0.22	9:hsa;hsa-mir-6855,129869650,129869671,+	0.239738	0.217789
hsa-miR-6511b-3p	2	2	0.75	0.24	0.22	16:hsa;hsa-mir-6511b-1,15134118,15134140,-	0.0899016	0.0816708
hsa-miR-135b-5p	2	2	2	0.24	0.22	1:hsa;hsa-mir-135b,205448317,205448339,-	0.239738	0.217789
hsa-miR-5680	2	2	2	0.24	0.22	8:hsa;hsa-mir-5680,102125483,102125504,+	0.239738	0.217789
hsa-miR-605-5p	2	2	2	0.24	0.22	10:hsa;hsa-mir-605,51299588,51299610,+	0.239738	0.217789
hsa-miR-5692c	1	2	1	0.24	0.22	7:hsa;hsa-mir-5692c-2,97964457,97964478,-	0.119869	0.108894
hsa-miR-6847-5p	2	2	2	0.24	0.22	8:hsa;hsa-mir-6847,144079879,144079901,+	0.239738	0.217789
hsa-miR-548ar-3p	2	2	2	0.24	0.22	13:hsa;hsa-mir-548ar,114244541,114244561,+	0.239738	0.217789
hsa-miR-5706	1	2	2	0.24	0.22	5:hsa;hsa-mir-5706,119154646,119154667,+	0.239738	0.217789
hsa-miR-1293	2	2	2	0.24	0.22	12:hsa;hsa-mir-1293,50234151,50234172,-	0.239738	0.217789
hsa-miR-3614-5p	1	2	2	0.24	0.22	17:hsa;hsa-mir-3614,56891284,56891306,-	0.239738	0.217789
hsa-miR-6511b-3p	2	2	0.75	0.24	0.22	16:hsa;hsa-mir-6511b-1,2106721,2106743,-	0.0899016	0.0816708
hsa-miR-3121-3p	1	2	2	0.24	0.22	1:hsa;hsa-mir-3121,180438360,180438381,-	0.239738	0.217789
hsa-miR-3139	2	2	2	0.24	0.22	4:hsa;hsa-mir-3139,143343469,143343491,+	0.239738	0.217789
hsa-miR-548at-5p	2	2	2	0.24	0.22	17:hsa;hsa-mir-548at,42494773,42494794,+	0.239738	0.217789
hsa-miR-3940-5p	2	2	2	0.24	0.22	19:hsa;hsa-mir-3940,6416432,6416451,-	0.239738	0.217789
hsa-miR-3940-3p	1	2	2	0.24	0.22	19:hsa;hsa-mir-3940,6416466,6416487,-	0.239738	0.217789
hsa-miR-610	1	2	2	0.24	0.22	11:hsa;hsa-mir-610,28056830,28056850,+	0.239738	0.217789
hsa-miR-6852-3p	2	2	2	0.24	0.22	9:hsa;hsa-mir-6852,35710717,35710733,-	0.239738	0.217789
hsa-miR-3194-5p	1	2	2	0.24	0.22	20:hsa;hsa-mir-3194,51452914,51452934,-	0.239738	0.217789
hsa-miR-219b-3p	1	2	2	0.24	0.22	9:hsa;hsa-mir-219b,128392676,128392698,+	0.239738	0.217789
hsa-miR-4782-5p	2	2	2	0.24	0.22	2:hsa;hsa-mir-4782,113721299,113721320,-	0.239738	0.217789
hsa-miR-3944-3p	1	2	2	0.24	0.22	10:hsa;hsa-mir-3944,133371618,133371640,-	0.239738	0.217789
hsa-miR-3074-3p	2	2	2	0.24	0.22	9:hsa;hsa-mir-3074,95086063,95086084,-	0.239738	0.217789
hsa-miR-548a-5p	2	2	2	0.24	0.22	8:hsa;hsa-mir-548a-3,104484393,104484414,-	0.239738	0.217789
hsa-miR-3160-3p	2	2	1	0.24	0.22	11:hsa;hsa-mir-3160-2,46451858,46451879,+	0.119869	0.108894
hsa-miR-1277-5p	2	2	2	0.24	0.22	X:hsa;hsa-mir-1277,118386401,118386424,+	0.239738	0.217789
hsa-miR-19a-5p	2	2	2	0.24	0.22	13:hsa;hsa-mir-19a,91350904,91350925,+	0.239738	0.217789
hsa-miR-6845-5p	2	2	2	0.24	0.22	8:hsa;hsa-mir-6845,143837761,143837779,-	0.239738	0.217789
hsa-miR-4709-5p	2	2	2	0.24	0.22	14:hsa;hsa-mir-4709,74480141,74480162,-	0.239738	0.217789
hsa-miR-5006-3p	2	2	2	0.24	0.22	13:hsa;hsa-mir-5006,41568355,41568375,-	0.239738	0.217789
hsa-miR-4423-5p	2	2	2	0.24	0.22	1:hsa;hsa-mir-4423,85133806,85133827,+	0.239738	0.217789
hsa-miR-4642	1	2	2	0.24	0.22	6:hsa;hsa-mir-4642,44435650,44435671,+	0.239738	0.217789
hsa-miR-3170	2	2	2	0.24	0.22	13:hsa;hsa-mir-3170,98208533,98208554,+	0.239738	0.217789
hsa-miR-3910	2	2	1	0.24	0.22	9:hsa;hsa-mir-3910-1,91636313,91636332,+	0.119869	0.108894
hsa-miR-1247-3p	1	2	2	0.24	0.22	14:hsa;hsa-mir-1247,101560360,101560383,-	0.239738	0.217789
hsa-miR-6882-5p	2	2	2	0.24	0.22	15:hsa;hsa-mir-6882,74840647,74840668,-	0.239738	0.217789
hsa-miR-7851-3p	2	2	2	0.24	0.22	12:hsa;hsa-mir-7851,42323798,42323819,-	0.239738	0.217789
hsa-miR-6824-5p	2	2	2	0.24	0.22	3:hsa;hsa-mir-6824,48633641,48633662,-	0.239738	0.217789
hsa-miR-3177-5p	1	2	2	0.24	0.22	16:hsa;hsa-mir-3177,1734995,1735017,+	0.239738	0.217789
hsa-miR-1256	1	2	2	0.24	0.22	1:hsa;hsa-mir-1256,20988348,20988369,-	0.239738	0.217789
hsa-miR-1909-3p	2	2	2	0.24	0.22	19:hsa;hsa-mir-1909,1816207,1816228,-	0.239738	0.217789
hsa-miR-3942-5p	2	2	2	0.24	0.22	15:hsa;hsa-mir-3942,35372278,35372299,-	0.239738	0.217789
hsa-miR-664b-3p	1	2	2	0.24	0.22	X:hsa;hsa-mir-664b,154768635,154768656,+	0.239738	0.217789
hsa-miR-5191	2	2	2	0.24	0.22	1:hsa;hsa-mir-5191,201719579,201719600,+	0.239738	0.217789
hsa-miR-4687-5p	2	2	2	0.24	0.22	11:hsa;hsa-mir-4687,3856073,3856094,+	0.239738	0.217789
hsa-miR-642a-3p	2	2	2	0.24	0.22	19:hsa;hsa-mir-642a,45674978,45674999,+	0.239738	0.217789
hsa-miR-6500-5p	2	2	2	0.24	0.22	1:hsa;hsa-mir-6500,51060031,51060054,+	0.239738	0.217789
hsa-miR-1269b	2	2	2	0.24	0.22	17:hsa;hsa-mir-1269b,12917276,12917297,-	0.239738	0.217789
hsa-miR-378a-5p	2	2	2	0.24	0.22	5:hsa;hsa-mir-378a,149732829,149732850,+	0.239738	0.217789
hsa-miR-3910	2	2	1	0.24	0.22	9:hsa;hsa-mir-3910-2,91636313,91636332,-	0.119869	0.108894
hsa-miR-491-3p	2	2	2	0.24	0.22	9:hsa;hsa-mir-491,20716154,20716175,+	0.239738	0.217789
hsa-miR-4449	2	2	2	0.24	0.22	4:hsa;hsa-mir-4449,52712720,52712741,+	0.239738	0.217789
hsa-miR-3160-3p	2	2	1	0.24	0.22	11:hsa;hsa-mir-3160-1,46451858,46451879,-	0.119869	0.108894
hsa-miR-365a-5p	2	2	2	0.24	0.22	16:hsa;hsa-mir-365a,14309300,14309322,+	0.239738	0.217789
hsa-miR-218-2-3p	2	2	2	0.24	0.22	5:hsa;hsa-mir-218-2,168768212,168768233,-	0.239738	0.217789
hsa-miR-590-5p	1	2	2	0.24	0.22	7:hsa;hsa-mir-590,74191213,74191234,+	0.239738	0.217789
hsa-miR-1286	1	2	2	0.24	0.22	22:hsa;hsa-mir-1286,20249180,20249200,-	0.239738	0.217789
hsa-miR-6813-5p	2	2	2	0.24	0.22	20:hsa;hsa-mir-6813,64076960,64076982,-	0.239738	0.217789
hsa-miR-3165	2	2	2	0.24	0.22	11:hsa;hsa-mir-3165,72072237,72072258,-	0.239738	0.217789
hsa-miR-544a	2	2	2	0.24	0.22	14:hsa;hsa-mir-544a,101048712,101048733,+	0.239738	0.217789
hsa-miR-5692c	1	2	1	0.24	0.22	5:hsa;hsa-mir-5692c-1,135803043,135803064,-	0.119869	0.108894
hsa-miR-6786-3p	1	2	2	0.24	0.22	17:hsa;hsa-mir-6786,81693844,81693866,+	0.239738	0.217789
hsa-miR-6886-5p	1	2	2	0.24	0.22	19:hsa;hsa-mir-6886,11113479,11113499,+	0.239738	0.217789
hsa-miR-106a-5p	2	2	1.5	0.24	0.22	X:hsa;hsa-mir-106a,134170210,134170232,-	0.179803	0.163342
hsa-miR-4723-5p	2	2	2	0.24	0.22	17:hsa;hsa-mir-4723,28360660,28360683,+	0.239738	0.217789
hsa-miR-219a-5p	1	2	1	0.24	0.22	9:hsa;hsa-mir-219a-2,128392636,128392656,-	0.119869	0.108894
hsa-miR-3140-3p	1	1	1	0.12	0.11	4:hsa;hsa-mir-3140,152489386,152489407,-	0.119869	0.108894
hsa-miR-6724-5p	1	1	0.04	0.12	0.11	GL000220.1:hsa;hsa-mir-6724-4,104742,104764,+	0.00428103	0.00388909
hsa-miR-548ah-5p	1	1	1	0.12	0.11	4:hsa;hsa-mir-548ah,76575561,76575580,+	0.119869	0.108894
hsa-miR-6770-5p	1	1	0.11	0.12	0.11	16:hsa;hsa-mir-6770-2,14930825,14930848,+	0.0133188	0.0120994
hsa-miR-548i	1	1	0.25	0.12	0.11	3:hsa;hsa-mir-548i-1,125790442,125790463,-	0.0299672	0.0272236
hsa-miR-1233-3p	1	1	0.25	0.12	0.11	15:hsa;hsa-mir-1233-1,34528352,34528371,-	0.0299672	0.0272236
hsa-miR-449b-5p	1	1	1	0.12	0.11	5:hsa;hsa-mir-449b,55170661,55170682,-	0.119869	0.108894
hsa-miR-4479	1	1	1	0.12	0.11	9:hsa;hsa-mir-4479,136886777,136886798,+	0.119869	0.108894
hsa-miR-3678-5p	1	1	1	0.12	0.11	17:hsa;hsa-mir-3678,75406077,75406096,+	0.119869	0.108894
hsa-miR-20b-5p	1	1	0.33	0.12	0.11	X:hsa;hsa-mir-20b,134169814,134169836,-	0.0399563	0.0362981
hsa-miR-3179	1	1	0.06	0.12	0.11	16:hsa;hsa-mir-3179-2,18494544,18494565,-	0.0074918	0.0068059
hsa-miR-1233-3p	1	1	0.25	0.12	0.11	15:hsa;hsa-mir-1233-1,34382131,34382150,-	0.0299672	0.0272236
hsa-miR-3145-5p	1	1	1	0.12	0.11	6:hsa;hsa-mir-3145,138435224,138435245,-	0.119869	0.108894
hsa-miR-5701	1	1	0.08	0.12	0.11	KI270727.1:hsa;hsa-mir-5701-1,241102,241120,+	0.00998907	0.00907454
hsa-miR-6761-5p	1	1	1	0.12	0.11	12:hsa;hsa-mir-6761,111799839,111799859,+	0.119869	0.108894
hsa-miR-139-5p	1	1	1	0.12	0.11	11:hsa;hsa-mir-139,72615069,72615091,-	0.119869	0.108894
hsa-miR-548d-3p	1	1	0.5	0.12	0.11	17:hsa;hsa-mir-548d-2,67471549,67471570,-	0.0599344	0.0544472
hsa-miR-6724-5p	1	1	0.04	0.12	0.11	21:hsa;hsa-mir-6724-1,8205325,8205347,+	0.00428103	0.00388909
hsa-miR-3179	1	1	0.06	0.12	0.11	16:hsa;hsa-mir-3179-4,18494544,18494565,-	0.0074918	0.0068059
hsa-miR-3180-5p	1	1	0.11	0.12	0.11	16:hsa;hsa-mir-3180-2,14911237,14911261,+	0.0133188	0.0120994
hsa-miR-598-5p	1	1	1	0.12	0.11	8:hsa;hsa-mir-598,11035229,11035251,-	0.119869	0.108894
hsa-miR-141-5p	1	1	1	0.12	0.11	12:hsa;hsa-mir-141,6964113,6964134,+	0.119869	0.108894
hsa-miR-6862-5p	1	1	0.25	0.12	0.11	16:hsa;hsa-mir-6862-1,28390987,28391008,-	0.0299672	0.0272236
hsa-miR-7845-5p	1	1	1	0.12	0.11	2:hsa;hsa-mir-7845,207166402,207166422,+	0.119869	0.108894
hsa-miR-1233-3p	1	1	0.25	0.12	0.11	15:hsa;hsa-mir-1233-2,34528352,34528371,-	0.0299672	0.0272236
hsa-miR-6724-5p	1	1	0.04	0.12	0.11	21:hsa;hsa-mir-6724-4,8205325,8205347,+	0.00428103	0.00388909
hsa-miR-6724-5p	1	1	0.04	0.12	0.11	GL000220.1:hsa;hsa-mir-6724-1,148714,148736,+	0.00428103	0.00388909
hsa-miR-6724-5p	1	1	0.04	0.12	0.11	21:hsa;hsa-mir-6724-1,8249515,8249537,+	0.00428103	0.00388909
hsa-miR-192-3p	1	1	1	0.12	0.11	11:hsa;hsa-mir-192,64891203,64891224,-	0.119869	0.108894
hsa-miR-3180-5p	1	1	0.11	0.12	0.11	16:hsa;hsa-mir-3180-2,18402193,18402217,-	0.0133188	0.0120994
hsa-miR-95-3p	1	1	1	0.12	0.11	4:hsa;hsa-mir-95,8005349,8005370,-	0.119869	0.108894
hsa-miR-3919	1	1	1	0.12	0.11	3:hsa;hsa-mir-3919,159282700,159282720,+	0.119869	0.108894
hsa-miR-3179	1	1	0.06	0.12	0.11	16:hsa;hsa-mir-3179-2,18411945,18411966,-	0.0074918	0.0068059
hsa-miR-3143	1	1	1	0.12	0.11	6:hsa;hsa-mir-3143,27147629,27147653,+	0.119869	0.108894
hsa-miR-605-3p	1	1	1	0.12	0.11	10:hsa;hsa-mir-605,51299623,51299644,+	0.119869	0.108894
hsa-miR-9-3p	1	1	0.33	0.12	0.11	5:hsa;hsa-mir-9-2,88666905,88666926,-	0.0399563	0.0362981
hsa-miR-6724-5p	1	1	0.04	0.12	0.11	GL000220.1:hsa;hsa-mir-6724-3,104742,104764,+	0.00428103	0.00388909
hsa-miR-6724-5p	1	1	0.04	0.12	0.11	GL000220.1:hsa;hsa-mir-6724-4,148714,148736,+	0.00428103	0.00388909
hsa-miR-3180-5p	1	1	0.11	0.12	0.11	16:hsa;hsa-mir-3180-1,14911237,14911261,+	0.0133188	0.0120994
hsa-miR-5701	1	1	0.08	0.12	0.11	15:hsa;hsa-mir-5701-3,20940261,20940279,+	0.00998907	0.00907454
hsa-miR-3648	1	1	0.25	0.12	0.11	21:hsa;hsa-mir-3648-1,8987026,8987046,+	0.0299672	0.0272236
hsa-miR-3179	1	1	0.06	0.12	0.11	16:hsa;hsa-mir-3179-4,18411945,18411966,-	0.0074918	0.0068059
hsa-miR-659-3p	1	1	1	0.12	0.11	22:hsa;hsa-mir-659,37847738,37847759,-	0.119869	0.108894
hsa-miR-6516-5p	1	1	1	0.12	0.11	17:hsa;hsa-mir-6516,77089428,77089449,+	0.119869	0.108894
hsa-miR-3179	1	1	0.06	0.12	0.11	16:hsa;hsa-mir-3179-1,16300210,16300231,+	0.0074918	0.0068059
hsa-miR-6862-5p	1	1	0.25	0.12	0.11	16:hsa;hsa-mir-6862-1,28724257,28724278,+	0.0299672	0.0272236
hsa-miR-4439	1	1	1	0.12	0.11	2:hsa;hsa-mir-4439,225010464,225010485,-	0.119869	0.108894
hsv1-miR-H12	1	1	0.5	0.12	0.11	NC_001806;hsv1-mir-H12,132012,132033,-	0.0599344	0.0544472
hsa-miR-6724-5p	1	1	0.04	0.12	0.11	KI270733.1:hsa;hsa-mir-6724-1,121591,121613,+	0.00428103	0.00388909
hsa-miR-6724-5p	1	1	0.04	0.12	0.11	KI270733.1:hsa;hsa-mir-6724-4,121591,121613,+	0.00428103	0.00388909
hsa-miR-1269a	1	1	1	0.12	0.11	4:hsa;hsa-mir-1269a,66276890,66276911,+	0.119869	0.108894
hsa-miR-548i	1	1	0.25	0.12	0.11	8:hsa;hsa-mir-548i-3,8088979,8089000,-	0.0299672	0.0272236
hsa-miR-548i	1	1	0.25	0.12	0.11	4:hsa;hsa-mir-548i-2,9556206,9556227,-	0.0299672	0.0272236
hsa-miR-4765	1	1	1	0.12	0.11	2:hsa;hsa-mir-4765,32635300,32635321,+	0.119869	0.108894
hsa-miR-1537-5p	1	1	1	0.12	0.11	1:hsa;hsa-mir-1537,235853002,235853023,-	0.119869	0.108894
hsa-miR-1537-3p	1	1	1	0.12	0.11	1:hsa;hsa-mir-1537,235853039,235853060,-	0.119869	0.108894
hsa-miR-6724-5p	1	1	0.04	0.12	0.11	21:hsa;hsa-mir-6724-1,8432540,8432562,+	0.00428103	0.00388909
hsa-miR-6502-5p	1	1	1	0.12	0.11	12:hsa;hsa-mir-6502,66251091,66251112,+	0.119869	0.108894
hsa-miR-3180-5p	1	1	0.11	0.12	0.11	16:hsa;hsa-mir-3180-1,16309892,16309916,+	0.0133188	0.0120994
hsa-miR-3663-5p	1	1	1	0.12	0.11	10:hsa;hsa-mir-3663,117167698,117167718,-	0.119869	0.108894
hsa-miR-3166	1	1	1	0.12	0.11	11:hsa;hsa-mir-3166,88176561,88176583,+	0.119869	0.108894
hsa-miR-3180-5p	1	1	0.11	0.12	0.11	16:hsa;hsa-mir-3180-2,16309892,16309916,+	0.0133188	0.0120994
hsa-miR-5701	1	1	0.08	0.12	0.11	15:hsa;hsa-mir-5701-2,20940261,20940279,+	0.00998907	0.00907454
hsa-miR-6770-5p	1	1	0.11	0.12	0.11	16:hsa;hsa-mir-6770-2,18379356,18379379,-	0.0133188	0.0120994
hsa-miR-548ao-3p	1	1	1	0.12	0.11	8:hsa;hsa-mir-548ao,41271105,41271126,-	0.119869	0.108894
hsa-miR-4665-5p	1	1	1	0.12	0.11	9:hsa;hsa-mir-4665,6007835,6007857,+	0.119869	0.108894
hsa-miR-3179	1	1	0.06	0.12	0.11	16:hsa;hsa-mir-3179-1,14901559,14901580,+	0.0074918	0.0068059
hsa-miR-3122	1	1	1	0.12	0.11	1:hsa;hsa-mir-3122,212077622,212077643,+	0.119869	0.108894
hsa-miR-6529-5p	1	1	1	0.12	0.11	3:hsa;hsa-mir-6529,120084577,120084598,-	0.119869	0.108894
hsa-miR-194-3p	1	1	1	0.12	0.11	11:hsa;hsa-mir-194-2,64891405,64891426,-	0.119869	0.108894
hsa-miR-6793-5p	1	1	1	0.12	0.11	19:hsa;hsa-mir-6793,10828978,10828999,+	0.119869	0.108894
hsa-miR-3202	1	1	1	0.12	0.11	X:hsa;hsa-mir-3202-1,153981105,153981126,+	0.119869	0.108894
hsa-miR-6770-5p	1	1	0.11	0.12	0.11	16:hsa;hsa-mir-6770-2,16329310,16329333,+	0.0133188	0.0120994
hsa-miR-6724-5p	1	1	0.04	0.12	0.11	21:hsa;hsa-mir-6724-3,8432540,8432562,+	0.00428103	0.00388909
hsa-miR-4504	1	1	1	0.12	0.11	14:hsa;hsa-mir-4504,50299909,50299930,-	0.119869	0.108894
hsa-miR-3150a-5p	1	1	1	0.12	0.11	8:hsa;hsa-mir-3150a,95072925,95072946,+	0.119869	0.108894
hsa-miR-3124-5p	1	1	1	0.12	0.11	1:hsa;hsa-mir-3124,248826383,248826403,+	0.119869	0.108894
hsa-miR-129-2-3p	1	1	1	0.12	0.11	11:hsa;hsa-mir-129-2,43581450,43581471,+	0.119869	0.108894
hsa-miR-6827-3p	1	1	1	0.12	0.11	3:hsa;hsa-mir-6827,134367842,134367862,-	0.119869	0.108894
hsa-miR-7-5p	1	1	0.33	0.12	0.11	19:hsa;hsa-mir-7-3,4770700,4770723,+	0.0399563	0.0362981
hsa-miR-197-5p	1	1	1	0.12	0.11	1:hsa;hsa-mir-197,109598901,109598923,+	0.119869	0.108894
hsa-miR-3179	1	1	0.06	0.12	0.11	16:hsa;hsa-mir-3179-1,18494544,18494565,-	0.0074918	0.0068059
hsa-miR-6809-5p	1	1	1	0.12	0.11	2:hsa;hsa-mir-6809,217900518,217900539,-	0.119869	0.108894
hsa-miR-3913-3p	1	1	0.5	0.12	0.11	12:hsa;hsa-mir-3913-2,69584780,69584801,+	0.0599344	0.0544472
hsa-miR-6834-5p	1	1	1	0.12	0.11	6:hsa;hsa-mir-6834,33290245,33290265,+	0.119869	0.108894
hsa-miR-6724-5p	1	1	0.04	0.12	0.11	GL000220.1:hsa;hsa-mir-6724-2,148714,148736,+	0.00428103	0.00388909
hsa-miR-4676-3p	1	1	1	0.12	0.11	10:hsa;hsa-mir-4676,72721072,72721093,+	0.119869	0.108894
hsa-miR-6770-5p	1	1	0.11	0.12	0.11	16:hsa;hsa-mir-6770-3,16329310,16329333,+	0.0133188	0.0120994
hsa-miR-6829-5p	1	1	1	0.12	0.11	3:hsa;hsa-mir-6829,195882334,195882353,-	0.119869	0.108894
hsa-miR-6724-5p	1	1	0.04	0.12	0.11	21:hsa;hsa-mir-6724-3,8249515,8249537,+	0.00428103	0.00388909
hsa-miR-219b-5p	1	1	1	0.12	0.11	9:hsa;hsa-mir-219b,128392634,128392655,+	0.119869	0.108894
hsa-miR-500b-3p	1	1	1	0.12	0.11	X:hsa;hsa-mir-500b,50010722,50010741,+	0.119869	0.108894
hsa-miR-6724-5p	1	1	0.04	0.12	0.11	21:hsa;hsa-mir-6724-4,8432540,8432562,+	0.00428103	0.00388909
hsa-miR-6724-5p	1	1	0.04	0.12	0.11	21:hsa;hsa-mir-6724-2,8432540,8432562,+	0.00428103	0.00388909
hsa-miR-6724-5p	1	1	0.04	0.12	0.11	KI270733.1:hsa;hsa-mir-6724-3,121591,121613,+	0.00428103	0.00388909
hsa-miR-5701	1	1	0.08	0.12	0.11	15:hsa;hsa-mir-5701-2,21951251,21951269,+	0.00998907	0.00907454
hsa-miR-6784-3p	1	1	1	0.12	0.11	17:hsa;hsa-mir-6784,45114412,45114433,-	0.119869	0.108894
hsa-miR-6740-5p	1	1	1	0.12	0.11	1:hsa;hsa-mir-6740,202003129,202003150,+	0.119869	0.108894
hsa-miR-9-3p	1	1	0.33	0.12	0.11	1:hsa;hsa-mir-9-1,156420395,156420416,-	0.0399563	0.0362981
hsa-miR-3179	1	1	0.06	0.12	0.11	16:hsa;hsa-mir-3179-2,16300210,16300231,+	0.0074918	0.0068059
hsa-miR-9899	1	1	1	0.12	0.11	2:hsa;hsa-mir-9899,149330330,149330351,-	0.119869	0.108894
hsa-miR-4781-3p	1	1	1	0.12	0.11	1:hsa;hsa-mir-4781,54054124,54054145,+	0.119869	0.108894
hsa-miR-6850-3p	1	1	1	0.12	0.11	8:hsa;hsa-mir-6850,144791968,144791987,-	0.119869	0.108894
hsa-miR-3155a	1	1	1	0.12	0.11	10:hsa;hsa-mir-3155a,6152247,6152267,+	0.119869	0.108894
hsa-miR-6780a-5p	1	1	1	0.12	0.11	17:hsa;hsa-mir-6780a,42708089,42708111,-	0.119869	0.108894
hsa-miR-4761-5p	1	1	1	0.12	0.11	22:hsa;hsa-mir-4761,19963755,19963775,+	0.119869	0.108894
hsa-miR-4640-3p	1	1	1	0.12	0.11	6:hsa;hsa-mir-4640,30890949,30890970,+	0.119869	0.108894
hsa-miR-301b-5p	1	1	1	0.12	0.11	22:hsa;hsa-mir-301b,21652990,21653011,+	0.119869	0.108894
hsa-miR-3179	1	1	0.06	0.12	0.11	16:hsa;hsa-mir-3179-3,18494544,18494565,-	0.0074918	0.0068059
hsa-miR-9-3p	1	1	0.33	0.12	0.11	15:hsa;hsa-mir-9-3,89368071,89368092,+	0.0399563	0.0362981
hsa-miR-3179	1	1	0.06	0.12	0.11	16:hsa;hsa-mir-3179-3,18411945,18411966,-	0.0074918	0.0068059
hsa-miR-190b-5p	1	1	1	0.12	0.11	1:hsa;hsa-mir-190b,154193675,154193696,-	0.119869	0.108894
hsa-miR-6862-5p	1	1	0.25	0.12	0.11	16:hsa;hsa-mir-6862-2,28390987,28391008,-	0.0299672	0.0272236
hsa-miR-3074-5p	1	1	1	0.12	0.11	9:hsa;hsa-mir-3074,95086025,95086045,-	0.119869	0.108894
hsa-miR-6724-5p	1	1	0.04	0.12	0.11	21:hsa;hsa-mir-6724-4,8388372,8388394,+	0.00428103	0.00388909
hsa-miR-6754-3p	1	1	1	0.12	0.11	11:hsa;hsa-mir-6754,71473546,71473567,+	0.119869	0.108894
hsa-miR-6770-5p	1	1	0.11	0.12	0.11	16:hsa;hsa-mir-6770-3,14930825,14930848,+	0.0133188	0.0120994
hsa-miR-5701	1	1	0.08	0.12	0.11	15:hsa;hsa-mir-5701-1,21951251,21951269,+	0.00998907	0.00907454
hsa-miR-548a-3p	1	1	0.33	0.12	0.11	8:hsa;hsa-mir-548a-3,104484429,104484450,-	0.0399563	0.0362981
hsa-miR-4688	1	1	1	0.12	0.11	11:hsa;hsa-mir-4688,46376456,46376477,+	0.119869	0.108894
hsa-miR-3648	1	1	0.25	0.12	0.11	21:hsa;hsa-mir-3648-2,8208500,8208520,+	0.0299672	0.0272236
hsa-miR-3175	1	1	1	0.12	0.11	15:hsa;hsa-mir-3175,92904408,92904429,+	0.119869	0.108894
hsa-miR-6757-5p	1	1	1	0.12	0.11	12:hsa;hsa-mir-6757,53056949,53056970,+	0.119869	0.108894
hsa-miR-6757-3p	1	1	1	0.12	0.11	12:hsa;hsa-mir-6757,53056990,53057011,+	0.119869	0.108894
hsv1-miR-H12	1	1	0.5	0.12	0.11	NC_001806;hsv1-mir-H12,146202,146223,+	0.0599344	0.0544472
hsa-miR-4467	1	1	1	0.12	0.11	7:hsa;hsa-mir-4467,102471472,102471493,+	0.119869	0.108894
hsa-miR-607	1	1	1	0.12	0.11	10:hsa;hsa-mir-607,96828729,96828749,-	0.119869	0.108894
hsa-miR-3938	1	1	1	0.12	0.11	3:hsa;hsa-mir-3938,55852550,55852571,-	0.119869	0.108894
hsa-miR-4709-3p	1	1	1	0.12	0.11	14:hsa;hsa-mir-4709,74480180,74480202,-	0.119869	0.108894
hsa-miR-6770-5p	1	1	0.11	0.12	0.11	16:hsa;hsa-mir-6770-1,14930825,14930848,+	0.0133188	0.0120994
hsa-miR-6724-5p	1	1	0.04	0.12	0.11	GL000220.1:hsa;hsa-mir-6724-2,104742,104764,+	0.00428103	0.00388909
hsa-miR-6512-5p	1	1	1	0.12	0.11	2:hsa;hsa-mir-6512,177313814,177313835,-	0.119869	0.108894
hsa-miR-636	1	1	1	0.12	0.11	17:hsa;hsa-mir-636,76736510,76736532,-	0.119869	0.108894
hsa-miR-5701	1	1	0.08	0.12	0.11	15:hsa;hsa-mir-5701-1,20940261,20940279,+	0.00998907	0.00907454
hsa-miR-3648	1	1	0.25	0.12	0.11	21:hsa;hsa-mir-3648-1,8208500,8208520,+	0.0299672	0.0272236
hsa-miR-216a-5p	1	1	1	0.12	0.11	2:hsa;hsa-mir-216a,55988968,55988989,-	0.119869	0.108894
hsa-miR-216a-3p	1	1	1	0.12	0.11	2:hsa;hsa-mir-216a,55989007,55989028,-	0.119869	0.108894
hsa-miR-4699-5p	1	1	1	0.12	0.11	12:hsa;hsa-mir-4699,81158397,81158418,+	0.119869	0.108894
hsa-miR-4699-3p	1	1	1	0.12	0.11	12:hsa;hsa-mir-4699,81158433,81158454,+	0.119869	0.108894
hsa-miR-6862-5p	1	1	0.25	0.12	0.11	16:hsa;hsa-mir-6862-2,28724257,28724278,+	0.0299672	0.0272236
hsa-miR-586	1	1	1	0.12	0.11	6:hsa;hsa-mir-586,45197689,45197710,-	0.119869	0.108894
hsa-miR-4691-3p	1	1	1	0.12	0.11	11:hsa;hsa-mir-4691,68033949,68033971,+	0.119869	0.108894
hsa-miR-4672	1	1	1	0.12	0.11	9:hsa;hsa-mir-4672,127869465,127869485,-	0.119869	0.108894
hsa-miR-1343-5p	1	1	1	0.12	0.11	11:hsa;hsa-mir-1343,34941851,34941872,+	0.119869	0.108894
hsa-miR-6753-3p	1	1	1	0.12	0.11	11:hsa;hsa-mir-6753,68044932,68044953,+	0.119869	0.108894
hsa-miR-3179	1	1	0.06	0.12	0.11	16:hsa;hsa-mir-3179-3,14901559,14901580,+	0.0074918	0.0068059
hsa-miR-338-5p	1	1	1	0.12	0.11	17:hsa;hsa-mir-338,81125888,81125909,-	0.119869	0.108894
hsa-miR-6815-5p	1	1	1	0.12	0.11	21:hsa;hsa-mir-6815,45478271,45478293,+	0.119869	0.108894
hsa-miR-6815-3p	1	1	1	0.12	0.11	21:hsa;hsa-mir-6815,45478306,45478326,+	0.119869	0.108894
hsa-miR-6724-5p	1	1	0.04	0.12	0.11	21:hsa;hsa-mir-6724-2,8249515,8249537,+	0.00428103	0.00388909
hsa-miR-3180-5p	1	1	0.11	0.12	0.11	16:hsa;hsa-mir-3180-3,16309892,16309916,+	0.0133188	0.0120994
hsa-miR-6724-5p	1	1	0.04	0.12	0.11	21:hsa;hsa-mir-6724-3,8205325,8205347,+	0.00428103	0.00388909
hsa-miR-3179	1	1	0.06	0.12	0.11	16:hsa;hsa-mir-3179-4,14901559,14901580,+	0.0074918	0.0068059
hsa-miR-3179	1	1	0.06	0.12	0.11	16:hsa;hsa-mir-3179-4,16300210,16300231,+	0.0074918	0.0068059
hsa-miR-5701	1	1	0.08	0.12	0.11	15:hsa;hsa-mir-5701-2,21513968,21513986,+	0.00998907	0.00907454
hsa-miR-3164	1	1	1	0.12	0.11	11:hsa;hsa-mir-3164,69083185,69083206,+	0.119869	0.108894
hsa-miR-1233-3p	1	1	0.25	0.12	0.11	15:hsa;hsa-mir-1233-2,34382131,34382150,-	0.0299672	0.0272236
hsa-miR-4482-3p	1	1	1	0.12	0.11	10:hsa;hsa-mir-4482,104268379,104268400,-	0.119869	0.108894
hsa-miR-96-5p	1	1	1	0.12	0.11	7:hsa;hsa-mir-96,129774700,129774722,-	0.119869	0.108894
hsa-miR-184	1	1	1	0.12	0.11	15:hsa;hsa-mir-184,79209840,79209861,+	0.119869	0.108894
hsa-miR-550a-3-5p	1	1	0.33	0.12	0.11	7:hsa;hsa-mir-550a-3,29680754,29680773,-	0.0399563	0.0362981
hsa-miR-302a-5p	1	1	1	0.12	0.11	4:hsa;hsa-mir-302a,112648188,112648210,-	0.119869	0.108894
hsa-miR-302a-3p	1	1	1	0.12	0.11	4:hsa;hsa-mir-302a,112648226,112648248,-	0.119869	0.108894
hsa-miR-6724-5p	1	1	0.04	0.12	0.11	21:hsa;hsa-mir-6724-1,8388372,8388394,+	0.00428103	0.00388909
hsa-miR-5701	1	1	0.08	0.12	0.11	KI270727.1:hsa;hsa-mir-5701-3,241102,241120,+	0.00998907	0.00907454
hsa-miR-4653-5p	1	1	1	0.12	0.11	7:hsa;hsa-mir-4653,101159482,101159503,+	0.119869	0.108894
hsa-miR-4796-5p	1	1	1	0.12	0.11	3:hsa;hsa-mir-4796,114743453,114743474,-	0.119869	0.108894
hsa-miR-4796-3p	1	1	1	0.12	0.11	3:hsa;hsa-mir-4796,114743497,114743518,-	0.119869	0.108894
hsa-miR-766-5p	1	1	1	0.12	0.11	X:hsa;hsa-mir-766,119646766,119646787,-	0.119869	0.108894
hsa-miR-4773	1	1	0.5	0.12	0.11	2:hsa;hsa-mir-4773-2,151368381,151368402,-	0.0599344	0.0544472
hsa-miR-6511b-3p	1	1	0.25	0.12	0.11	16:hsa;hsa-mir-6511b-2,2106725,2106747,-	0.0299672	0.0272236
hsa-miR-4685-3p	1	1	1	0.12	0.11	10:hsa;hsa-mir-4685,98431339,98431360,-	0.119869	0.108894
hsa-miR-19b-1-5p	1	1	1	0.12	0.11	13:hsa;hsa-mir-19b-1,91351207,91351229,+	0.119869	0.108894
hsa-miR-6724-5p	1	1	0.04	0.12	0.11	21:hsa;hsa-mir-6724-3,8388372,8388394,+	0.00428103	0.00388909
hsa-miR-6824-3p	1	1	1	0.12	0.11	3:hsa;hsa-mir-6824,48633678,48633698,-	0.119869	0.108894
hsa-miR-150-5p	1	1	1	0.12	0.11	19:hsa;hsa-mir-150,49500800,49500821,-	0.119869	0.108894
hsa-miR-548aq-5p	1	1	1	0.12	0.11	3:hsa;hsa-mir-548aq,185767847,185767868,-	0.119869	0.108894
hsa-miR-3179	1	1	0.06	0.12	0.11	16:hsa;hsa-mir-3179-1,18411945,18411966,-	0.0074918	0.0068059
hsa-miR-4666a-3p	1	1	1	0.12	0.11	1:hsa;hsa-mir-4666a,228462125,228462145,+	0.119869	0.108894
hsa-miR-6748-5p	1	1	1	0.12	0.11	11:hsa;hsa-mir-6748,62789820,62789841,+	0.119869	0.108894
hsa-miR-6724-5p	1	1	0.04	0.12	0.11	GL000220.1:hsa;hsa-mir-6724-1,104742,104764,+	0.00428103	0.00388909
hsa-miR-3913-3p	1	1	0.5	0.12	0.11	12:hsa;hsa-mir-3913-1,69584780,69584801,-	0.0599344	0.0544472
hsa-miR-4457	1	1	1	0.12	0.11	5:hsa;hsa-mir-4457,1309352,1309373,-	0.119869	0.108894
hsa-miR-6511b-3p	1	1	0.25	0.12	0.11	16:hsa;hsa-mir-6511b-2,15134122,15134144,-	0.0299672	0.0272236
hsa-miR-4802-5p	1	1	1	0.12	0.11	4:hsa;hsa-mir-4802,40502052,40502073,-	0.119869	0.108894
hsa-miR-450b-3p	1	1	1	0.12	0.11	X:hsa;hsa-mir-450b,134540232,134540253,-	0.119869	0.108894
hsa-miR-5701	1	1	0.08	0.12	0.11	15:hsa;hsa-mir-5701-1,21513968,21513986,+	0.00998907	0.00907454
hsa-miR-6724-5p	1	1	0.04	0.12	0.11	21:hsa;hsa-mir-6724-2,8388372,8388394,+	0.00428103	0.00388909
hsa-miR-548a-3p	1	1	0.33	0.12	0.11	6:hsa;hsa-mir-548a-1,18571844,18571865,+	0.0399563	0.0362981
hsa-miR-6724-5p	1	1	0.04	0.12	0.11	21:hsa;hsa-mir-6724-2,8205325,8205347,+	0.00428103	0.00388909
hsa-miR-4638-5p	1	1	1	0.12	0.11	5:hsa;hsa-mir-4638,181222567,181222587,-	0.119869	0.108894
hsa-miR-3189-3p	1	1	1	0.12	0.11	19:hsa;hsa-mir-3189,18386607,18386627,+	0.119869	0.108894
hsa-miR-4773	1	1	0.5	0.12	0.11	2:hsa;hsa-mir-4773-1,151368381,151368402,+	0.0599344	0.0544472
hsa-miR-4750-5p	1	1	1	0.12	0.11	19:hsa;hsa-mir-4750,49888177,49888198,+	0.119869	0.108894
hsa-miR-4750-3p	1	1	1	0.12	0.11	19:hsa;hsa-mir-4750,49888209,49888230,+	0.119869	0.108894
hsa-miR-6733-5p	1	1	1	0.12	0.11	1:hsa;hsa-mir-6733,43171657,43171678,-	0.119869	0.108894
hsa-miR-6894-5p	1	1	1	0.12	0.11	X:hsa;hsa-mir-6894,53198894,53198917,-	0.119869	0.108894
hsa-miR-7-5p	1	1	0.33	0.12	0.11	15:hsa;hsa-mir-7-2,88611856,88611879,+	0.0399563	0.0362981
hsa-miR-6741-3p	1	1	1	0.12	0.11	1:hsa;hsa-mir-6741,225922121,225922142,-	0.119869	0.108894
hsa-miR-3619-5p	1	1	1	0.12	0.11	22:hsa;hsa-mir-3619,46091059,46091080,+	0.119869	0.108894
hsa-miR-3199	1	1	0.5	0.12	0.11	22:hsa;hsa-mir-3199-1,27920534,27920556,-	0.0599344	0.0544472
hsa-miR-6125	1	1	1	0.12	0.11	12:hsa;hsa-mir-6125,62260418,62260437,+	0.119869	0.108894
hsa-miR-6865-5p	1	1	1	0.12	0.11	17:hsa;hsa-mir-6865,4970091,4970113,-	0.119869	0.108894
hsa-miR-6724-5p	1	1	0.04	0.12	0.11	21:hsa;hsa-mir-6724-4,8249515,8249537,+	0.00428103	0.00388909
hsa-miR-4512	1	1	1	0.12	0.11	15:hsa;hsa-mir-4512,66497006,66497027,-	0.119869	0.108894
hsa-miR-3662	1	1	1	0.12	0.11	6:hsa;hsa-mir-3662,134979392,134979415,-	0.119869	0.108894
hsa-miR-3926	1	1	0.5	0.12	0.11	8:hsa;hsa-mir-3926-2,12727242,12727262,+	0.0599344	0.0544472
hsa-miR-4687-3p	1	1	1	0.12	0.11	11:hsa;hsa-mir-4687,3856113,3856133,+	0.119869	0.108894
hsa-miR-548d-3p	1	1	0.5	0.12	0.11	8:hsa;hsa-mir-548d-1,123348094,123348115,-	0.0599344	0.0544472
hsa-miR-5701	1	1	0.08	0.12	0.11	15:hsa;hsa-mir-5701-3,21513968,21513986,+	0.00998907	0.00907454
hsa-miR-3668	1	1	1	0.12	0.11	6:hsa;hsa-mir-3668,140205260,140205280,+	0.119869	0.108894
hsa-miR-6840-3p	1	1	1	0.12	0.11	7:hsa;hsa-mir-6840,100356696,100356717,+	0.119869	0.108894
hsa-miR-215-3p	1	1	1	0.12	0.11	1:hsa;hsa-mir-215,220117916,220117938,-	0.119869	0.108894
hsa-miR-3181	1	1	1	0.12	0.11	16:hsa;hsa-mir-3181,50742313,50742331,+	0.119869	0.108894
hsa-miR-7975	1	1	1	0.12	0.11	19:hsa;hsa-mir-7975,55123275,55123292,-	0.119869	0.108894
hsa-miR-4671-5p	1	1	1	0.12	0.11	1:hsa;hsa-mir-4671,234306476,234306497,+	0.119869	0.108894
hsa-miR-3133	1	1	1	0.12	0.11	2:hsa;hsa-mir-3133,241477914,241477935,+	0.119869	0.108894
hsa-miR-4442	1	1	1	0.12	0.11	3:hsa;hsa-mir-4442,25664921,25664937,-	0.119869	0.108894
hsa-miR-6508-5p	1	1	1	0.12	0.11	21:hsa;hsa-mir-6508,39447014,39447034,+	0.119869	0.108894
hsa-miR-6509-5p	1	1	1	0.12	0.11	7:hsa;hsa-mir-6509,135207008,135207028,-	0.119869	0.108894
hsa-miR-6509-3p	1	1	1	0.12	0.11	7:hsa;hsa-mir-6509,135207045,135207066,-	0.119869	0.108894
hsa-miR-3180-5p	1	1	0.11	0.12	0.11	16:hsa;hsa-mir-3180-3,14911237,14911261,+	0.0133188	0.0120994
hsa-miR-6746-5p	1	1	1	0.12	0.11	11:hsa;hsa-mir-6746,61878221,61878242,-	0.119869	0.108894
hsa-miR-6746-3p	1	1	1	0.12	0.11	11:hsa;hsa-mir-6746,61878257,61878278,-	0.119869	0.108894
hsa-miR-6770-5p	1	1	0.11	0.12	0.11	16:hsa;hsa-mir-6770-1,18379356,18379379,-	0.0133188	0.0120994
hsa-miR-3926	1	1	0.5	0.12	0.11	8:hsa;hsa-mir-3926-1,12727242,12727262,-	0.0599344	0.0544472
hsa-miR-548i	1	1	0.25	0.12	0.11	X:hsa;hsa-mir-548i-4,84225762,84225783,-	0.0299672	0.0272236
hsa-miR-4803	1	1	1	0.12	0.11	5:hsa;hsa-mir-4803,72169476,72169496,+	0.119869	0.108894
hsa-miR-4999-5p	1	1	1	0.12	0.11	19:hsa;hsa-mir-4999,8389310,8389330,-	0.119869	0.108894
hsa-miR-3620-3p	1	1	1	0.12	0.11	1:hsa;hsa-mir-3620,228097320,228097341,+	0.119869	0.108894
hsa-miR-5701	1	1	0.08	0.12	0.11	KI270727.1:hsa;hsa-mir-5701-2,241102,241120,+	0.00998907	0.00907454
hsa-miR-1910-3p	1	1	1	0.12	0.11	16:hsa;hsa-mir-1910,85741671,85741690,-	0.119869	0.108894
hsa-miR-5585-5p	1	1	1	0.12	0.11	1:hsa;hsa-mir-5585,32086949,32086970,+	0.119869	0.108894
hsa-miR-4684-3p	1	1	1	0.12	0.11	1:hsa;hsa-mir-4684,22719566,22719587,+	0.119869	0.108894
hsa-miR-8072	1	1	1	0.12	0.11	12:hsa;hsa-mir-8072,123364774,123364793,-	0.119869	0.108894
hsa-miR-155-3p	1	1	1	0.12	0.11	21:hsa;hsa-mir-155,25574022,25574043,+	0.119869	0.108894
hsa-miR-6876-5p	1	1	1	0.12	0.11	8:hsa;hsa-mir-6876,25345407,25345428,+	0.119869	0.108894
hsa-miR-3659	1	1	1	0.12	0.11	1:hsa;hsa-mir-3659,38089289,38089309,+	0.119869	0.108894
hsa-miR-5701	1	1	0.08	0.12	0.11	15:hsa;hsa-mir-5701-3,21951251,21951269,+	0.00998907	0.00907454
hsa-miR-616-3p	1	1	1	0.12	0.11	12:hsa;hsa-mir-616,57519218,57519239,-	0.119869	0.108894
hsa-miR-4795-3p	1	1	1	0.12	0.11	3:hsa;hsa-mir-4795,87226246,87226267,-	0.119869	0.108894
hsa-miR-6770-5p	1	1	0.11	0.12	0.11	16:hsa;hsa-mir-6770-3,18379356,18379379,-	0.0133188	0.0120994
hsa-miR-3126-3p	1	1	1	0.12	0.11	2:hsa;hsa-mir-3126,69103727,69103748,+	0.119869	0.108894
hsa-miR-6724-5p	1	1	0.04	0.12	0.11	GL000220.1:hsa;hsa-mir-6724-3,148714,148736,+	0.00428103	0.00388909
hsa-miR-4755-3p	1	1	1	0.12	0.11	20:hsa;hsa-mir-4755,34049162,34049183,+	0.119869	0.108894
hsa-miR-2276-5p	1	1	1	0.12	0.11	13:hsa;hsa-mir-2276,24162431,24162452,+	0.119869	0.108894
hsa-miR-2276-3p	1	1	1	0.12	0.11	13:hsa;hsa-mir-2276,24162469,24162490,+	0.119869	0.108894
hsa-miR-1913	1	1	1	0.12	0.11	6:hsa;hsa-mir-1913,166509402,166509423,-	0.119869	0.108894
hsa-miR-5696	1	1	1	0.12	0.11	2:hsa;hsa-mir-5696,101309453,101309474,+	0.119869	0.108894
hsa-miR-6864-5p	1	1	1	0.12	0.11	17:hsa;hsa-mir-6864,4969707,4969730,-	0.119869	0.108894
hsa-miR-3188	1	1	1	0.12	0.11	19:hsa;hsa-mir-3188,18282129,18282151,+	0.119869	0.108894
hsa-miR-5093	1	1	1	0.12	0.11	16:hsa;hsa-mir-5093,85306293,85306315,-	0.119869	0.108894
hsa-miR-4731-5p	1	1	1	0.12	0.11	17:hsa;hsa-mir-4731,15251636,15251657,-	0.119869	0.108894
hsa-miR-4731-3p	1	1	1	0.12	0.11	17:hsa;hsa-mir-4731,15251668,15251689,-	0.119869	0.108894
hsa-miR-4751	1	1	1	0.12	0.11	19:hsa;hsa-mir-4751,49933073,49933096,+	0.119869	0.108894
hsa-miR-15a-3p	1	1	1	0.12	0.11	13:hsa;hsa-mir-15a,50049169,50049190,-	0.119869	0.108894
hsa-miR-3616-3p	1	1	1	0.12	0.11	20:hsa;hsa-mir-3616,47167026,47167048,+	0.119869	0.108894
hsa-miR-3179	1	1	0.06	0.12	0.11	16:hsa;hsa-mir-3179-2,14901559,14901580,+	0.0074918	0.0068059
hsa-miR-4485-3p	1	1	1	0.12	0.11	11:hsa;hsa-mir-4485,10508300,10508319,-	0.119869	0.108894
hsa-miR-548a-3p	1	1	0.33	0.12	0.11	6:hsa;hsa-mir-548a-2,135239220,135239241,+	0.0399563	0.0362981
hsa-miR-5009-5p	1	1	1	0.12	0.11	15:hsa;hsa-mir-5009,89883951,89883974,-	0.119869	0.108894
hsa-miR-6747-3p	1	1	1	0.12	0.11	11:hsa;hsa-mir-6747,62567051,62567071,-	0.119869	0.108894
hsa-miR-3199	1	1	0.5	0.12	0.11	22:hsa;hsa-mir-3199-2,27920535,27920557,+	0.0599344	0.0544472
hsa-miR-3183	1	1	1	0.12	0.11	17:hsa;hsa-mir-3183,1022485,1022506,-	0.119869	0.108894
hsa-miR-3648	1	1	0.25	0.12	0.11	21:hsa;hsa-mir-3648-2,8987026,8987046,+	0.0299672	0.0272236
hsa-miR-4644	1	1	1	0.12	0.11	6:hsa;hsa-mir-4644,170330813,170330835,+	0.119869	0.108894
hsa-miR-4517	1	1	1	0.12	0.11	16:hsa;hsa-mir-4517,28958587,28958611,+	0.119869	0.108894
hsa-miR-6770-5p	1	1	0.11	0.12	0.11	16:hsa;hsa-mir-6770-1,16329310,16329333,+	0.0133188	0.0120994
hsa-miR-579-3p	1	1	1	0.12	0.11	5:hsa;hsa-mir-579,32394439,32394461,-	0.119869	0.108894
hsa-miR-5189-5p	1	1	1	0.12	0.11	16:hsa;hsa-mir-5189,88468943,88468966,+	0.119869	0.108894
hsa-miR-4637	1	1	1	0.12	0.11	5:hsa;hsa-mir-4637,14825988,14826009,-	0.119869	0.108894
hsa-miR-4804-5p	1	1	1	0.12	0.11	5:hsa;hsa-mir-4804,72878600,72878620,+	0.119869	0.108894
hsa-miR-642b-3p	1	1	1	0.12	0.11	19:hsa;hsa-mir-642b,45674978,45674999,-	0.119869	0.108894
hsa-miR-3180-5p	1	1	0.11	0.12	0.11	16:hsa;hsa-mir-3180-1,18402195,18402219,-	0.0133188	0.0120994
hsa-miR-3180-5p	1	1	0.11	0.12	0.11	16:hsa;hsa-mir-3180-3,18402195,18402219,-	0.0133188	0.0120994
hsa-miR-3179	1	1	0.06	0.12	0.11	16:hsa;hsa-mir-3179-3,16300210,16300231,+	0.0074918	0.0068059
hsa-miR-6724-5p	1	1	0.04	0.12	0.11	KI270733.1:hsa;hsa-mir-6724-2,121591,121613,+	0.00428103	0.00388909
hsa-miR-760	1	1	1	0.12	0.11	1:hsa;hsa-mir-760,93846880,93846899,+	0.119869	0.108894

## Sheet: mock-hsa
Table S3: Human (hsa-) and herpes simplex virus 1 (hsv1-) mature miRNAs detected in mock samples, and at 10 h.p.i., and 24 h.p.i.
HFF mock - human miRNAs
name	unique reads	read count	read count (mult. map. adj.)	RPM (lib)	RPM (total)	coordinateString	RPM_adj (lib)	RPM_adj (total)
hsa-miR-22-3p	359	1155457	1155457	138503	125823	17:hsa;hsa-mir-22,1713955,1713976,-	138503	125823
hsa-miR-27b-3p	834	793627	792337	95131.1	86421.6	9:hsa;hsa-mir-27b,95085505,95085525,+	94976.5	86281.1
hsa-miR-21-5p	690	772506	772506	92599.4	84121.6	17:hsa;hsa-mir-21,59841273,59841294,+	92599.4	84121.6
hsa-miR-143-3p	875	629076	629076	75406.6	68502.9	5:hsa;hsa-mir-143,149428978,149428998,+	75406.6	68502.9
hsa-miR-26a-5p	604	610520	305428	73182.3	66482.2	12:hsa;hsa-mir-26a-2,57824622,57824643,-	36611.3	33259.4
hsa-miR-26a-5p	576	610234	305142	73148	66451.1	3:hsa;hsa-mir-26a-1,37969413,37969434,+	36577	33228.3
hsa-let-7a-5p	430	392602	131548	47060.7	42752.2	22:hsa;hsa-let-7a-3,46112752,46112773,+	15768.5	14324.9
hsa-let-7a-5p	433	392019	130952	46990.8	42688.7	11:hsa;hsa-let-7a-2,122146526,122146547,-	15697	14259.9
hsa-let-7a-5p	421	391570	130504	46937	42639.8	9:hsa;hsa-let-7a-1,94175962,94175983,+	15643.4	14211.2
hsa-miR-127-3p	1302	376946	376946	45184.1	41047.3	14:hsa;hsa-mir-127,100883035,100883056,+	45184.1	41047.3
hsa-miR-181a-5p	487	363423	181712	43563.1	39574.8	1:hsa;hsa-mir-181a-1,198859067,198859089,-	21781.7	19787.5
hsa-miR-181a-5p	486	363421	181710	43562.8	39574.5	9:hsa;hsa-mir-181a-2,124692480,124692502,+	21781.4	19787.3
hsa-let-7f-5p	382	325410	169160	39006.5	35435.3	X:hsa;hsa-let-7f-2,53557199,53557220,-	20277.1	18420.6
hsa-let-7f-5p	313	313486	157239	37577.2	34136.9	9:hsa;hsa-let-7f-1,94176353,94176374,+	18848.1	17122.5
hsa-miR-199a-3p	939	288164	97778.7	34541.9	31379.5	1:hsa;hsa-mir-199a-2,172144604,172144625,-	11720.6	10647.6
hsa-miR-199b-3p	843	285706	95260.2	34247.2	31111.8	9:hsa;hsa-mir-199b,128244785,128244806,-	11418.7	10373.3
hsa-miR-199a-3p	833	285690	95250.2	34245.3	31110	19:hsa;hsa-mir-199a-1,10817472,10817493,-	11417.5	10372.2
hsa-miR-191-5p	287	207997	207997	24932.3	22649.7	3:hsa;hsa-mir-191,49020633,49020655,-	24932.3	22649.7
hsa-let-7i-5p	332	174344	174150	20898.4	18985.1	12:hsa;hsa-let-7i,62603691,62603712,+	20875.2	18964
hsa-miR-222-3p	460	126805	126805	15200	13808.4	X:hsa;hsa-mir-222,45747083,45747103,-	15200	13808.4
hsa-miR-30a-5p	462	117874	117848	14129.4	12835.8	6:hsa;hsa-mir-30a,71403556,71403577,-	14126.4	12833
hsa-miR-16-5p	186	113837	56979.7	13645.5	12396.2	3:hsa;hsa-mir-16-2,160404754,160404775,+	6830.08	6204.77
hsa-miR-16-5p	184	113766	56908.7	13637	12388.5	13:hsa;hsa-mir-16-1,50048986,50049007,-	6821.57	6197.04
hsa-miR-100-5p	346	99858	99780	11969.9	10874	11:hsa;hsa-mir-100,122152241,122152262,-	11960.5	10865.5
hsa-miR-92a-3p	682	98210	52830.3	11772.3	10694.5	13:hsa;hsa-mir-92a-1,91351361,91351382,+	6332.71	5752.93
hsa-miR-92a-3p	576	91333	45953.3	10948	9945.66	X:hsa;hsa-mir-92a-2,134169585,134169606,-	5508.37	5004.06
hsa-miR-151a-3p	596	86790	86790	10403.4	9450.95	8:hsa;hsa-mir-151a,140732610,140732630,-	10403.4	9450.95
hsa-miR-221-3p	440	66944	66944	8024.5	7289.83	X:hsa;hsa-mir-221,45746221,45746243,-	8024.5	7289.83
hsa-miR-29a-3p	420	66844	66841.8	8012.51	7278.94	7:hsa;hsa-mir-29a,130876788,130876809,-	8012.25	7278.7
hsa-miR-411-5p	218	61107	61107	7324.82	6654.21	14:hsa;hsa-mir-411,101023340,101023360,+	7324.82	6654.21
hsa-miR-27a-3p	377	57881	56676.7	6938.13	6302.92	19:hsa;hsa-mir-27a,13836490,13836510,-	6793.76	6171.77
hsa-miR-125b-5p	286	54685	27452	6555.02	5954.89	11:hsa;hsa-mir-125b-1,122099771,122099792,-	3290.64	2989.37
hsa-miR-125b-5p	274	54599	27366	6544.72	5945.53	21:hsa;hsa-mir-125b-2,16590253,16590274,+	3280.33	2980.01
hsa-miR-151a-5p	107	53987	53349	6471.36	5878.88	8:hsa;hsa-mir-151a,140732574,140732594,-	6394.88	5809.41
hsa-let-7b-5p	458	51764	50400.7	6204.89	5636.81	22:hsa;hsa-let-7b,46113691,46113712,+	6041.47	5488.36
hsa-miR-30d-5p	299	49921	49891.5	5983.97	5436.12	8:hsa;hsa-mir-30d,134804881,134804902,-	5980.43	5432.91
hsa-miR-28-3p	207	49689	49689	5956.16	5410.86	3:hsa;hsa-mir-28,188688834,188688855,+	5956.16	5410.86
hsa-miR-26b-5p	231	43885	43885	5260.44	4778.83	2:hsa;hsa-mir-26b,218402657,218402677,+	5260.44	4778.83
hsa-miR-30e-5p	271	39414	39401	4724.51	4291.97	1:hsa;hsa-mir-30e,40754371,40754392,+	4722.95	4290.55
hsa-let-7g-5p	217	38773	38461.2	4647.67	4222.16	3:hsa;hsa-let-7g,52268282,52268303,-	4610.29	4188.21
hsa-miR-654-3p	349	37843	37843	4536.19	4120.89	14:hsa;hsa-mir-654,101040269,101040290,+	4536.19	4120.89
hsa-miR-181b-5p	360	37530	19318.2	4498.68	4086.81	9:hsa;hsa-mir-181b-2,124693725,124693747,+	2315.65	2103.64
hsa-miR-92b-3p	766	36668	36667.3	4395.35	3992.94	1:hsa;hsa-mir-92b,155195237,155195258,+	4395.27	3992.87
hsa-miR-181b-5p	339	36590	18378.2	4386	3984.45	1:hsa;hsa-mir-181b-1,198858908,198858930,-	2202.97	2001.28
hsa-miR-31-5p	186	36022	36022	4317.91	3922.6	9:hsa;hsa-mir-31,21512122,21512142,-	4317.91	3922.6
hsa-miR-186-5p	241	32734	32734	3923.79	3564.55	1:hsa;hsa-mir-186,71067645,71067666,-	3923.79	3564.55
hsa-miR-199b-5p	214	30747	30723	3685.61	3348.18	9:hsa;hsa-mir-199b,128244746,128244768,-	3682.73	3345.56
hsa-miR-199a-5p	270	28362	14175	3399.72	3088.46	1:hsa;hsa-mir-199a-2,172144565,172144587,-	1699.14	1543.58
hsa-miR-199a-5p	270	28362	14175	3399.72	3088.46	19:hsa;hsa-mir-199a-1,10817431,10817453,-	1699.14	1543.58
hsa-miR-103a-3p	373	28244	13704.5	3385.57	3075.61	20:hsa;hsa-mir-103a-2,3917541,3917563,+	1642.74	1492.34
hsa-miR-103a-3p	354	28122	13583.5	3370.95	3062.33	5:hsa;hsa-mir-103a-1,168560943,168560965,-	1628.24	1479.17
hsa-miR-409-3p	352	27147	27147	3254.08	2956.16	14:hsa;hsa-mir-409,101065346,101065367,+	3254.08	2956.16
hsa-miR-125a-5p	209	26216	26216	3142.48	2854.78	19:hsa;hsa-mir-125a,51693268,51693291,+	3142.48	2854.78
hsa-miR-25-3p	154	23734	23734	2844.97	2584.5	7:hsa;hsa-mir-25,100093611,100093632,-	2844.97	2584.5
hsa-miR-381-3p	166	21126	21126	2532.35	2300.5	14:hsa;hsa-mir-381,101045968,101045989,+	2532.35	2300.5
hsa-miR-125b-1-3p	234	20708	20708	2482.24	2254.99	11:hsa;hsa-mir-125b-1,122099811,122099832,-	2482.24	2254.99
hsa-miR-130a-3p	224	20377	20377	2442.57	2218.94	11:hsa;hsa-mir-130a,57641252,57641273,+	2442.57	2218.94
hsa-miR-23a-3p	218	17882	17805.5	2143.49	1947.25	19:hsa;hsa-mir-23a,13836631,13836651,-	2134.32	1938.92
hsa-miR-10b-5p	174	17394	17285.5	2085	1894.11	2:hsa;hsa-mir-10b,176150329,176150351,+	2071.99	1882.29
hsa-miR-99b-5p	208	17267	17267	2069.77	1880.28	19:hsa;hsa-mir-99b,51692618,51692639,+	2069.77	1880.28
hsa-let-7d-5p	154	15987	15615.7	1916.34	1740.9	9:hsa;hsa-let-7d,94178841,94178862,+	1871.84	1700.46
hsa-miR-23b-3p	231	15697	15619.5	1881.58	1709.32	9:hsa;hsa-mir-23b,95085265,95085287,+	1872.29	1700.88
hsa-miR-21-3p	182	14906	14906	1786.76	1623.18	17:hsa;hsa-mir-21,59841311,59841331,+	1786.76	1623.18
hsa-miR-101-3p	238	13876	7020.5	1663.3	1511.02	9:hsa;hsa-mir-101-2,4850345,4850365,+	841.539	764.493
hsa-miR-101-3p	224	13716	6860.5	1644.12	1493.6	1:hsa;hsa-mir-101-1,65058480,65058500,-	822.36	747.07
hsa-miR-196b-5p	205	13309	13307.2	1595.33	1449.28	7:hsa;hsa-mir-196b,27169494,27169515,-	1595.11	1449.08
hsa-let-7c-5p	172	13122	12697.2	1572.92	1428.91	21:hsa;hsa-let-7c,16539838,16539859,+	1521.99	1382.65
hsa-miR-148b-3p	163	12761	12758.5	1529.65	1389.6	12:hsa;hsa-mir-148b,54337278,54337299,+	1529.35	1389.33
hsa-miR-423-5p	212	12521	12521	1500.88	1363.47	17:hsa;hsa-mir-423,30117095,30117117,+	1500.88	1363.47
hsa-miR-196a-5p	159	12469	9832.17	1494.64	1357.8	12:hsa;hsa-mir-196a-2,53991762,53991783,+	1178.57	1070.67
hsa-let-7e-5p	206	11483	11301.1	1376.45	1250.43	19:hsa;hsa-let-7e,51692793,51692814,+	1354.66	1230.63
hsa-miR-155-5p	241	11327	11327	1357.75	1233.45	21:hsa;hsa-mir-155,25573983,25574006,+	1357.75	1233.45
hsa-miR-410-3p	80	11304	11304	1355	1230.94	14:hsa;hsa-mir-410,101065961,101065981,+	1355	1230.94
hsa-miR-148a-3p	129	10803	10800.5	1294.94	1176.39	7:hsa;hsa-mir-148a,25949962,25949983,-	1294.64	1176.11
hsa-miR-181c-5p	136	10731	10731	1286.31	1168.55	19:hsa;hsa-mir-181c,13874725,13874746,+	1286.31	1168.55
hsa-miR-24-3p	159	10654	5364	1277.08	1160.16	9:hsa;hsa-mir-24-1,95086064,95086085,+	642.976	584.11
hsa-miR-24-3p	147	10580	5290	1268.21	1152.1	19:hsa;hsa-mir-24-2,13836336,13836357,-	634.106	576.052
hsa-miR-28-5p	98	10091	10091	1209.6	1098.85	3:hsa;hsa-mir-28,188688794,188688815,+	1209.6	1098.85
hsa-miR-423-3p	234	9800	9800	1174.71	1067.17	17:hsa;hsa-mir-423,30117131,30117153,+	1174.71	1067.17
hsa-miR-136-3p	104	9787	9787	1173.16	1065.75	14:hsa;hsa-mir-136,100884750,100884771,+	1173.16	1065.75
hsa-miR-152-3p	238	9467	9467	1134.8	1030.9	17:hsa;hsa-mir-152,48037214,48037234,-	1134.8	1030.9
hsa-miR-146b-5p	128	9375	9375	1123.77	1020.89	10:hsa;hsa-mir-146b,102436520,102436542,+	1123.77	1020.89
hsa-miR-192-5p	165	9260	9260	1109.99	1008.36	11:hsa;hsa-mir-192,64891160,64891180,-	1109.99	1008.36
hsa-miR-98-5p	94	8167	8100.55	978.97	889.34	X:hsa;hsa-mir-98,53556244,53556265,-	971.003	882.105
hsa-miR-181a-2-3p	125	7443	7443	892.18	810.5	9:hsa;hsa-mir-181a-2,124692518,124692539,+	892.183	810.501
hsa-miR-493-5p	112	7374	7374	883.91	802.99	14:hsa;hsa-mir-493,100869075,100869096,+	883.912	802.988
hsa-miR-431-5p	66	6544	6544	784.42	712.61	14:hsa;hsa-mir-431,100881026,100881046,+	784.421	712.605
hsa-miR-301a-3p	73	6496	6494.5	778.67	707.38	17:hsa;hsa-mir-301a,59151186,59151208,-	778.488	707.215
hsa-miR-196a-5p	97	6494	3857.67	778.43	707.16	17:hsa;hsa-mir-196a-1,48632496,48632517,-	462.414	420.078
hsa-miR-320a-3p	241	5594	5234.34	670.55	609.16	8:hsa;hsa-mir-320a,22245007,22245028,-	627.434	569.99
hsa-miR-769-5p	72	5430	5430	650.89	591.3	19:hsa;hsa-mir-769,46018961,46018982,+	650.888	591.297
hsa-miR-30b-5p	65	5277	5277	632.55	574.64	8:hsa;hsa-mir-30b,134800536,134800557,-	632.548	574.636
hsa-miR-140-3p	195	5073	5073	608.09	552.42	16:hsa;hsa-mir-140,69933142,69933162,+	608.094	552.422
hsa-miR-27b-5p	79	4822	4822	578.01	525.09	9:hsa;hsa-mir-27b,95085463,95085484,+	578.007	525.089
hsa-miR-107	156	4785	2810	573.57	521.06	10:hsa;hsa-mir-107,89592796,89592818,-	336.831	305.993
hsa-miR-486-5p	179	4755	2525	569.98	517.79	8:hsa;hsa-mir-486-2,41660444,41660465,+	302.669	274.958
hsa-miR-34c-5p	55	4622	4622	554.03	503.31	11:hsa;hsa-mir-34c,111513451,111513473,+	554.034	503.31
hsa-miR-493-3p	77	4613	4613	552.95	502.33	14:hsa;hsa-mir-493,100869116,100869137,+	552.955	502.33
hsa-miR-486-5p	151	4509	2279	540.49	491.01	8:hsa;hsa-mir-486-1,41660444,41660465,-	273.181	248.17
hsa-miR-130b-3p	102	4453	4453	533.78	484.91	22:hsa;hsa-mir-130b,21653354,21653375,+	533.776	484.907
hsa-miR-93-5p	110	4153	4153	497.82	452.24	7:hsa;hsa-mir-93,100093778,100093800,-	497.815	452.239
hsa-miR-221-5p	92	3769	3769	451.79	410.42	X:hsa;hsa-mir-221,45746181,45746202,-	451.785	410.423
hsa-miR-224-5p	89	3765	3765	451.31	409.99	X:hsa;hsa-mir-224,151958584,151958608,-	451.306	409.988
hsa-miR-99a-5p	67	3664	3589.5	439.2	398.99	21:hsa;hsa-mir-99a,16539101,16539122,+	430.269	390.877
hsa-miR-30c-5p	75	3652	1828	437.76	397.68	6:hsa;hsa-mir-30c-2,71376966,71376988,-	219.12	199.059
hsa-miR-30c-5p	73	3648	1824	437.28	397.25	1:hsa;hsa-mir-30c-1,40757300,40757322,+	218.641	198.623
hsa-miR-15a-5p	58	3537	3537	423.98	385.16	13:hsa;hsa-mir-15a,50049132,50049153,-	423.976	385.16
hsa-miR-889-3p	53	3476	3476	416.66	378.52	14:hsa;hsa-mir-889,101047949,101047969,+	416.664	378.517
hsa-miR-128-3p	112	3089	1749	370.27	336.37	2:hsa;hsa-mir-128-1,135665446,135665466,+	209.651	190.456
hsa-miR-181a-3p	71	3059	3055.5	366.68	333.11	1:hsa;hsa-mir-181a-1,198859107,198859128,-	366.259	332.727
hsa-miR-345-5p	60	2955	2955	354.21	321.78	14:hsa;hsa-mir-345,100307876,100307897,+	354.212	321.783
hsa-miR-455-5p	103	2907	2907	348.46	316.56	9:hsa;hsa-mir-455,114209449,114209470,+	348.459	316.556
hsa-miR-15b-5p	48	2829	2829	339.11	308.06	3:hsa;hsa-mir-15b,160404607,160404628,+	339.109	308.062
hsa-miR-128-3p	87	2724	1384	326.52	296.63	3:hsa;hsa-mir-128-2,35744527,35744547,+	165.898	150.71
hsa-miR-744-5p	53	2630	2630	315.25	286.39	17:hsa;hsa-mir-744,12081909,12081930,+	315.255	286.392
hsa-miR-425-5p	88	2613	2613	313.22	284.54	3:hsa;hsa-mir-425,49020161,49020183,-	313.217	284.541
hsa-miR-30a-3p	97	2592	2591	310.7	282.25	6:hsa;hsa-mir-30a,71403597,71403618,-	310.58	282.146
hsa-miR-369-5p	41	2551	2551	305.79	277.79	14:hsa;hsa-mir-369,101065606,101065627,+	305.785	277.79
hsa-miR-30e-3p	55	2466	2465	295.6	268.53	1:hsa;hsa-mir-30e,40754413,40754434,+	295.477	268.425
hsa-miR-100-3p	36	2241	2241	268.63	244.03	11:hsa;hsa-mir-100,122152276,122152297,-	268.626	244.032
hsa-miR-132-3p	80	2186	2186	262.03	238.04	17:hsa;hsa-mir-132,2049966,2049987,-	262.033	238.043
hsa-miR-487b-3p	90	2160	2160	258.92	235.21	14:hsa;hsa-mir-487b,101046505,101046526,+	258.917	235.212
hsa-miR-424-5p	44	2155	2155	258.32	234.67	X:hsa;hsa-mir-424,134546624,134546645,-	258.317	234.668
hsa-miR-126-5p	26	2132	2132	255.56	232.16	9:hsa;hsa-mir-126,136670616,136670636,+	255.56	232.163
hsa-miR-181d-5p	68	2025	2023.67	242.73	220.51	19:hsa;hsa-mir-181d,13874910,13874932,+	242.574	220.366
hsa-miR-374a-3p	41	2019	2019	242.02	219.86	X:hsa;hsa-mir-374a,74287327,74287348,-	242.015	219.858
hsa-miR-549a-5p	27	1957	1957	234.58	213.11	15:hsa;hsa-mir-549a,80842005,80842026,-	234.583	213.106
hsa-miR-432-5p	133	1947	1947	233.38	212.02	14:hsa;hsa-mir-432,100884496,100884518,+	233.385	212.017
hsa-miR-484	97	1927	1927	230.99	209.84	16:hsa;hsa-mir-484,15643301,15643322,+	230.987	209.84
hsa-miR-218-5p	56	1898	968	227.51	206.68	4:hsa;hsa-mir-218-1,20528299,20528319,+	116.033	105.41
hsa-miR-136-5p	49	1866	1866	223.68	203.2	14:hsa;hsa-mir-136,100884716,100884738,+	223.675	203.197
hsa-miR-218-5p	51	1862	932	223.2	202.76	5:hsa;hsa-mir-218-2,168768170,168768190,-	111.718	101.49
hsa-miR-145-5p	57	1848	1848	221.52	201.24	5:hsa;hsa-mir-145,149430661,149430683,+	221.518	201.237
hsa-miR-450b-5p	47	1825	1825	218.76	198.73	X:hsa;hsa-mir-450b,134540195,134540216,-	218.761	198.732
hsa-miR-361-5p	57	1824	1824	218.64	198.62	X:hsa;hsa-mir-361,85903641,85903662,-	218.641	198.623
hsa-miR-181c-3p	58	1748	1744.5	209.53	190.35	19:hsa;hsa-mir-181c,13874763,13874784,+	209.111	189.966
hsa-miR-378a-3p	53	1720	1699.25	206.17	187.3	5:hsa;hsa-mir-378a,149732867,149732888,+	203.687	185.039
hsa-miR-19b-3p	40	1660	835.83	198.98	180.76	X:hsa;hsa-mir-19b-2,134169732,134169754,-	100.19	91.0176
hsa-miR-19b-3p	39	1651	826.83	197.9	179.78	13:hsa;hsa-mir-19b-1,91351245,91351267,+	99.1115	90.0376
hsa-miR-340-5p	44	1650	1650	197.78	179.68	5:hsa;hsa-mir-340,180015318,180015339,-	197.784	179.676
hsa-miR-145-3p	87	1639	1639	196.46	178.48	5:hsa;hsa-mir-145,149430699,149430720,+	196.465	178.478
hsa-miR-424-3p	72	1632	1632	195.63	177.72	X:hsa;hsa-mir-424,134546661,134546681,-	195.626	177.716
hsa-miR-34a-5p	77	1595	1595	191.19	173.69	1:hsa;hsa-mir-34a,9151689,9151710,-	191.191	173.687
hsa-miR-134-5p	82	1415	1415	169.61	154.09	14:hsa;hsa-mir-134,101054694,101054715,+	169.614	154.086
hsa-miR-151b	28	1399	761	167.7	152.34	14:hsa;hsa-mir-151b,100109478,100109495,-	91.2202	82.8687
hsa-miR-299-3p	52	1377	1377	165.06	149.95	14:hsa;hsa-mir-299,101023832,101023853,+	165.059	149.948
hsa-miR-301b-3p	30	1376	1374.5	164.94	149.84	22:hsa;hsa-mir-301b,21653025,21653047,+	164.76	149.675
hsa-miR-370-3p	115	1352	1352	162.06	147.23	14:hsa;hsa-mir-370,100911186,100911207,+	162.063	147.225
hsa-miR-125b-2-3p	68	1346	1346	161.34	146.57	21:hsa;hsa-mir-125b-2,16590290,16590311,+	161.343	146.572
hsa-miR-1307-5p	48	1277	1277	153.07	139.06	10:hsa;hsa-mir-1307,103394293,103394313,-	153.072	139.058
hsa-miR-214-5p	46	1259	1259	150.91	137.1	1:hsa;hsa-mir-214,172138827,172138848,-	150.915	137.098
hsa-miR-106b-3p	85	1214	1214	145.52	132.2	7:hsa;hsa-mir-106b,100094044,100094065,-	145.521	132.198
hsa-miR-941	29	1197	70.41	143.48	130.35	20:hsa;hsa-mir-941-2,63919551,63919573,+	8.44017	7.66745
hsa-miR-941	29	1197	70.41	143.48	130.35	20:hsa;hsa-mir-941-2,63919802,63919824,+	8.44017	7.66745
hsa-miR-542-3p	74	1197	1197	143.48	130.35	X:hsa;hsa-mir-542,134541393,134541414,-	143.483	130.347
hsa-miR-941	29	1197	70.41	143.48	130.35	20:hsa;hsa-mir-941-5,63919551,63919573,+	8.44017	7.66745
hsa-miR-941	29	1197	70.41	143.48	130.35	20:hsa;hsa-mir-941-2,63919607,63919629,+	8.44017	7.66745
hsa-miR-941	29	1197	70.41	143.48	130.35	20:hsa;hsa-mir-941-3,63919607,63919629,+	8.44017	7.66745
hsa-miR-941	29	1197	70.41	143.48	130.35	20:hsa;hsa-mir-941-5,63919914,63919936,+	8.44017	7.66745
hsa-miR-941	29	1197	70.41	143.48	130.35	20:hsa;hsa-mir-941-4,63919914,63919936,+	8.44017	7.66745
hsa-miR-941	29	1197	70.41	143.48	130.35	20:hsa;hsa-mir-941-4,63919607,63919629,+	8.44017	7.66745
hsa-miR-941	29	1197	70.41	143.48	130.35	20:hsa;hsa-mir-941-4,63919802,63919824,+	8.44017	7.66745
hsa-miR-941	29	1197	70.41	143.48	130.35	20:hsa;hsa-mir-941-3,63919802,63919824,+	8.44017	7.66745
hsa-miR-941	29	1197	70.41	143.48	130.35	20:hsa;hsa-mir-941-3,63919914,63919936,+	8.44017	7.66745
hsa-miR-941	29	1197	70.41	143.48	130.35	20:hsa;hsa-mir-941-3,63919551,63919573,+	8.44017	7.66745
hsa-miR-941	29	1197	70.41	143.48	130.35	20:hsa;hsa-mir-941-5,63919802,63919824,+	8.44017	7.66745
hsa-miR-941	29	1197	70.41	143.48	130.35	20:hsa;hsa-mir-941-4,63919551,63919573,+	8.44017	7.66745
hsa-miR-941	29	1197	70.41	143.48	130.35	20:hsa;hsa-mir-941-2,63919914,63919936,+	8.44017	7.66745
hsa-miR-941	29	1197	70.41	143.48	130.35	20:hsa;hsa-mir-941-1,63919495,63919517,+	8.44017	7.66745
hsa-miR-941	29	1197	70.41	143.48	130.35	20:hsa;hsa-mir-941-5,63919607,63919629,+	8.44017	7.66745
hsa-miR-574-3p	79	1196	1196	143.36	130.24	4:hsa;hsa-mir-574,38868092,38868113,+	143.363	130.238
hsa-miR-454-3p	36	1196	1196	143.36	130.24	17:hsa;hsa-mir-454,59137821,59137843,-	143.363	130.238
hsa-miR-374a-5p	28	1185	1184.5	142.04	129.04	X:hsa;hsa-mir-374a,74287297,74287318,-	141.985	128.985
hsa-miR-421	75	1177	1177	141.09	128.17	X:hsa;hsa-mir-421,74218424,74218446,-	141.086	128.169
hsa-miR-584-5p	67	1128	1128	135.21	122.83	5:hsa;hsa-mir-584,149062328,149062349,-	135.212	122.833
hsa-miR-532-5p	72	1128	1128	135.21	122.83	X:hsa;hsa-mir-532,50003167,50003188,+	135.212	122.833
hsa-miR-382-5p	45	1120	1120	134.25	121.96	14:hsa;hsa-mir-382,101054316,101054337,+	134.253	121.962
hsa-miR-887-3p	81	1119	1119	134.13	121.85	5:hsa;hsa-mir-887,15935229,15935250,+	134.133	121.853
hsa-miR-210-3p	86	1108	1108	132.81	120.66	11:hsa;hsa-mir-210,568154,568175,-	132.815	120.655
hsa-miR-1468-5p	33	1080	1080	129.46	117.61	X:hsa;hsa-mir-1468,63786014,63786034,-	129.458	117.606
hsa-miR-365b-3p	45	1067	534	127.9	116.19	17:hsa;hsa-mir-365b,31575478,31575499,+	64.0099	58.1496
hsa-miR-365a-3p	44	1066	533	127.78	116.08	16:hsa;hsa-mir-365a,14309340,14309361,+	63.8901	58.0407
hsa-miR-450a-5p	44	1059	531.5	126.94	115.32	X:hsa;hsa-mir-450a-2,134540530,134540551,-	63.7103	57.8774
hsa-miR-450a-5p	43	1056	528.5	126.58	114.99	X:hsa;hsa-mir-450a-1,134540358,134540379,-	63.3507	57.5507
hsa-miR-671-3p	73	1035	1035	124.06	112.71	7:hsa;hsa-mir-671,151238488,151238508,+	124.064	112.706
hsa-miR-342-3p	64	1031	1031	123.58	112.27	14:hsa;hsa-mir-342,100109715,100109737,+	123.585	112.27
hsa-miR-24-2-5p	55	1023	1023	122.63	111.4	19:hsa;hsa-mir-24-2,13836299,13836320,-	122.626	111.399
hsa-miR-29c-3p	63	990	988.5	118.67	107.81	1:hsa;hsa-mir-29c,207801905,207801926,-	118.49	107.642
hsa-miR-29b-3p	43	969	488.83	116.15	105.52	1:hsa;hsa-mir-29b-2,207802494,207802516,-	58.5959	53.2312
hsa-miR-29b-3p	42	961	480.83	115.19	104.65	7:hsa;hsa-mir-29b-1,130877509,130877531,-	57.6369	52.3601
hsa-miR-539-3p	61	913	913	109.44	99.42	14:hsa;hsa-mir-539,101047369,101047390,+	109.44	99.4206
hsa-miR-10a-5p	51	892	780	106.92	97.13	17:hsa;hsa-mir-10a,48579859,48579881,-	93.4977	84.9377
hsa-miR-106b-5p	74	876	876	105.01	95.39	7:hsa;hsa-mir-106b,100094004,100094024,-	105.005	95.3915
hsa-miR-130b-5p	30	875	875	104.89	95.28	22:hsa;hsa-mir-130b,21653316,21653336,+	104.885	95.2826
hsa-miR-339-3p	48	854	854	102.37	93	7:hsa;hsa-mir-339,1022982,1023004,-	102.368	92.9959
hsa-miR-1185-1-3p	48	847	813	101.53	92.23	14:hsa;hsa-mir-1185-1,101043029,101043050,+	97.4533	88.5312
hsa-miR-758-3p	31	836	836	100.21	91.04	14:hsa;hsa-mir-758,101026071,101026092,+	100.21	91.0358
hsa-miR-17-5p	45	817	815.83	97.93	88.97	13:hsa;hsa-mir-17,91350618,91350640,+	97.793	88.8397
hsa-miR-376c-3p	49	803	803	96.25	87.44	14:hsa;hsa-mir-376c,101039732,101039752,+	96.2546	87.4422
hsa-miR-204-5p	29	788	788	94.46	85.81	9:hsa;hsa-mir-204,70810007,70810028,-	94.4566	85.8088
hsa-miR-1260b	5	766	418	91.82	83.41	11:hsa;hsa-mir-1260b,96341447,96341465,+	50.1052	45.5179
hsa-miR-654-5p	57	762	762	91.34	82.98	14:hsa;hsa-mir-654,101040234,101040255,+	91.34	82.9776
hsa-miR-152-5p	29	754	754	90.38	82.11	17:hsa;hsa-mir-152,48037176,48037198,-	90.3811	82.1064
hsa-miR-335-3p	34	753	753	90.26	82	7:hsa;hsa-mir-335,130496162,130496183,+	90.2612	81.9975
hsa-miR-411-3p	32	735	735	88.1	80.04	14:hsa;hsa-mir-411,101023375,101023396,+	88.1036	80.0374
hsa-miR-1260a	11	723	375	86.67	78.73	14:hsa;hsa-mir-1260a,77266231,77266248,+	44.9508	40.8354
hsa-miR-148b-5p	32	715	715	85.71	77.86	12:hsa;hsa-mir-148b,54337240,54337261,+	85.7062	77.8595
hsa-miR-500a-3p	51	712	636.5	85.35	77.53	X:hsa;hsa-mir-500a,50008482,50008503,+	76.2965	69.3113
hsa-miR-193b-3p	64	689	689	82.59	75.03	16:hsa;hsa-mir-193b,14304017,14304038,+	82.5896	75.0283
hsa-miR-193a-3p	22	689	689	82.59	75.03	17:hsa;hsa-mir-193a,31560050,31560071,+	82.5896	75.0283
hsa-miR-127-5p	67	686	686	82.23	74.7	14:hsa;hsa-mir-127,100883001,100883022,+	82.23	74.7016
hsa-miR-369-3p	36	680	680	81.51	74.05	14:hsa;hsa-mir-369,101065641,101065661,+	81.5108	74.0482
hsa-miR-214-3p	127	676	676	81.03	73.61	1:hsa;hsa-mir-214,172138868,172138889,-	81.0313	73.6126
hsa-miR-182-5p	33	645	645	77.32	70.24	7:hsa;hsa-mir-182,129770405,129770428,-	77.3154	70.2369
hsa-miR-335-5p	16	641	641	76.84	69.8	7:hsa;hsa-mir-335,130496126,130496148,+	76.8359	69.8013
hsa-miR-660-5p	27	633	633	75.88	68.93	X:hsa;hsa-mir-660,50013256,50013277,+	75.8769	68.9302
hsa-miR-30d-3p	25	622	622	74.56	67.73	8:hsa;hsa-mir-30d,134804921,134804942,-	74.5584	67.7323
hsa-miR-1307-3p	38	614	614	73.6	66.86	10:hsa;hsa-mir-1307,103394332,103394353,-	73.5994	66.8612
hsa-miR-320b	56	601	205.75	72.04	65.45	1:hsa;hsa-mir-320b-2,224257080,224257101,-	24.6636	22.4056
hsa-miR-320b	52	597	202.25	71.56	65.01	1:hsa;hsa-mir-320b-1,116671787,116671808,+	24.244	22.0244
hsa-miR-490-3p	48	594	594	71.2	64.68	7:hsa;hsa-mir-490,136903242,136903263,+	71.2021	64.6833
hsa-miR-138-5p	28	556	288.5	66.65	60.55	3:hsa;hsa-mir-138-1,44114234,44114256,+	34.5821	31.416
hsa-miR-374b-5p	26	554	553.5	66.41	60.33	X:hsa;hsa-mir-374b,74218557,74218578,-	66.3474	60.2731
hsa-miR-361-3p	42	543	543	65.09	59.13	X:hsa;hsa-mir-361,85903680,85903702,-	65.0888	59.1297
hsa-miR-138-5p	28	542	274.5	64.97	59.02	16:hsa;hsa-mir-138-2,56858527,56858549,+	32.904	29.8915
hsa-miR-16-2-3p	28	515	515	61.73	56.08	3:hsa;hsa-mir-16-2,160404797,160404818,+	61.7324	56.0806
hsa-miR-212-3p	33	509	509	61.01	55.43	17:hsa;hsa-mir-212,2050341,2050361,-	61.0132	55.4273
hsa-miR-12136	15	501	250.5	60.05	54.56	MT:hsa;hsa-mir-12136,7444,7461,-	30.0271	27.2781
hsa-miR-12136	15	501	250.5	60.05	54.56	1:hsa;hsa-mir-12136,632615,632632,-	30.0271	27.2781
hsa-miR-487a-3p	14	490	490	58.74	53.36	14:hsa;hsa-mir-487a,101052494,101052515,+	58.7357	53.3583
hsa-miR-99b-3p	66	489	489	58.62	53.25	19:hsa;hsa-mir-99b,51692656,51692677,+	58.6158	53.2494
hsa-miR-132-5p	25	487	487	58.38	53.03	17:hsa;hsa-mir-132,2049930,2049951,-	58.3761	53.0316
hsa-miR-485-5p	19	454	454	54.42	49.44	14:hsa;hsa-mir-485,101055427,101055448,+	54.4204	49.4381
hsa-miR-27a-5p	20	448	448	53.7	48.78	19:hsa;hsa-mir-27a,13836449,13836470,-	53.7012	48.7847
hsa-miR-19a-3p	29	435	434.33	52.14	47.37	13:hsa;hsa-mir-19a,91350939,91350961,+	52.063	47.2965
hsa-miR-149-5p	35	434	434	52.02	47.26	2:hsa;hsa-mir-149,240456015,240456037,+	52.0231	47.2602
hsa-miR-3615	38	427	427	51.18	46.5	17:hsa;hsa-mir-3615,74748663,74748683,+	51.184	46.4979
hsa-miR-379-3p	27	427	427	51.18	46.5	14:hsa;hsa-mir-379,101022109,101022130,+	51.184	46.4979
hsa-miR-1304-3p	30	422	422	50.58	45.95	11:hsa;hsa-mir-1304,93733726,93733747,-	50.5846	45.9535
hsa-miR-376a-5p	25	422	422	50.58	45.95	14:hsa;hsa-mir-376a-1,101040788,101040809,+	50.5846	45.9535
hsa-miR-589-5p	27	421	421	50.46	45.84	7:hsa;hsa-mir-589,5495842,5495863,-	50.4648	45.8446
hsa-miR-146a-5p	49	413	413	49.51	44.97	5:hsa;hsa-mir-146a,160485372,160485393,+	49.5058	44.9734
hsa-miR-452-5p	37	404	404	48.43	43.99	X:hsa;hsa-mir-452,151959641,151959662,-	48.427	43.9934
hsa-miR-561-5p	17	403	403	48.31	43.88	2:hsa;hsa-mir-561,188297517,188297538,+	48.3071	43.8845
hsa-miR-7706	28	387	387	46.39	42.14	15:hsa;hsa-mir-7706,85380639,85380662,+	46.3892	42.1421
hsa-miR-543	39	386	386	46.27	42.03	14:hsa;hsa-mir-543,101032033,101032054,+	46.2694	42.0333
hsa-miR-222-5p	28	381	381	45.67	41.49	X:hsa;hsa-mir-222,45747045,45747066,-	45.67	41.4888
hsa-miR-337-3p	43	378	378	45.31	41.16	14:hsa;hsa-mir-337,100874553,100874574,+	45.3104	41.1621
hsa-miR-153-3p	26	370	185	44.35	40.29	7:hsa;hsa-mir-153-2,157574388,157574409,-	22.1757	20.1455
hsa-miR-153-3p	26	370	185	44.35	40.29	2:hsa;hsa-mir-153-1,219294164,219294185,-	22.1757	20.1455
hsa-miR-455-3p	52	367	367	43.99	39.96	9:hsa;hsa-mir-455,114209487,114209507,+	43.9918	39.9643
hsa-miR-30c-1-3p	16	361	361	43.27	39.31	1:hsa;hsa-mir-30c-1,40757339,40757360,+	43.2726	39.3109
hsa-miR-26b-3p	20	360	360	43.15	39.2	2:hsa;hsa-mir-26b,218402692,218402712,+	43.1528	39.202
hsa-miR-665	34	352	352	42.19	38.33	14:hsa;hsa-mir-665,100875075,100875094,+	42.1938	38.3308
hsa-miR-377-3p	26	332	332	39.8	36.15	14:hsa;hsa-mir-377,101062094,101062115,+	39.7964	36.153
hsa-miR-615-3p	40	329	329	39.44	35.83	12:hsa;hsa-mir-615,54034010,54034031,+	39.4368	35.8263
hsa-miR-331-3p	47	320	320	38.36	34.85	12:hsa;hsa-mir-331,95308480,95308500,+	38.358	34.8462
hsa-miR-548k	13	318	318	38.12	34.63	11:hsa;hsa-mir-548k,70283986,70284007,+	38.1183	34.6284
hsa-miR-494-3p	30	313	313	37.52	34.08	14:hsa;hsa-mir-494,101029681,101029702,+	37.5189	34.084
hsa-miR-20a-5p	24	295	294.33	35.36	32.12	13:hsa;hsa-mir-20a,91351072,91351094,+	35.2814	32.0513
hsa-miR-323a-3p	22	285	285	34.16	31.03	14:hsa;hsa-mir-323a,101025782,101025802,+	34.1626	31.0349
hsa-miR-1287-5p	12	284	284	34.04	30.93	10:hsa;hsa-mir-1287,98395233,98395254,-	34.0427	30.926
hsa-miR-126-3p	24	284	284	34.04	30.93	9:hsa;hsa-mir-126,136670653,136670674,+	34.0427	30.926
hsa-miR-376a-3p	21	278	139.33	33.32	30.27	14:hsa;hsa-mir-376a-2,101040118,101040138,+	16.7017	15.1726
hsa-miR-376a-3p	20	277	138.33	33.2	30.16	14:hsa;hsa-mir-376a-1,101040825,101040845,+	16.5818	15.0637
hsa-miR-454-5p	20	274	274	32.84	29.84	17:hsa;hsa-mir-454,59137781,59137802,-	32.844	29.8371
hsa-miR-330-5p	16	269	269	32.24	29.29	19:hsa;hsa-mir-330,45639011,45639032,-	32.2447	29.2926
hsa-miR-140-5p	28	267	267	32	29.07	16:hsa;hsa-mir-140,69933103,69933124,+	32.005	29.0748
hsa-miR-641	25	266	266	31.89	28.97	19:hsa;hsa-mir-641,40282558,40282581,-	31.8851	28.9659
hsa-miR-125a-3p	23	260	260	31.17	28.31	19:hsa;hsa-mir-125a,51693306,51693327,+	31.1659	28.3126
hsa-miR-377-5p	9	255	255	30.57	27.77	14:hsa;hsa-mir-377,101062056,101062077,+	30.5665	27.7681
hsa-miR-29a-5p	20	254	254	30.45	27.66	7:hsa;hsa-mir-29a,130876750,130876771,-	30.4467	27.6592
hsa-miR-431-3p	35	253	253	30.33	27.55	14:hsa;hsa-mir-431,100881069,100881090,+	30.3268	27.5503
hsa-miR-30c-2-3p	13	250	250	29.97	27.22	6:hsa;hsa-mir-30c-2,71377006,71377027,-	29.9672	27.2236
hsa-miR-143-5p	20	245	245	29.37	26.68	5:hsa;hsa-mir-143,149428944,149428965,+	29.3679	26.6791
hsa-miR-708-3p	17	241	241	28.89	26.24	11:hsa;hsa-mir-708,79402078,79402099,-	28.8884	26.2436
hsa-miR-154-5p	15	241	241	28.89	26.24	14:hsa;hsa-mir-154,101059769,101059790,+	28.8884	26.2436
hsa-miR-22-5p	17	230	230	27.57	25.05	17:hsa;hsa-mir-22,1713917,1713938,-	27.5698	25.0457
hsa-miR-4775	15	227	227	27.21	24.72	2:hsa;hsa-mir-4775,207754816,207754837,+	27.2102	24.719
hsa-miR-1180-3p	20	223	223	26.73	24.28	17:hsa;hsa-mir-1180,19344546,19344567,-	26.7307	24.2835
hsa-miR-503-5p	62	219	219	26.25	23.85	X:hsa;hsa-mir-503,134546333,134546355,-	26.2513	23.8479
hsa-miR-194-5p	15	217	114.5	26.01	23.63	11:hsa;hsa-mir-194-2,64891369,64891390,-	13.725	12.4684
hsa-miR-194-5p	15	216	113.5	25.89	23.52	1:hsa;hsa-mir-194-1,220118171,220118192,-	13.6051	12.3595
hsa-miR-668-3p	36	212	212	25.41	23.09	14:hsa;hsa-mir-668,101055300,101055322,+	25.4122	23.0856
hsa-miR-412-5p	9	207	207	24.81	22.54	14:hsa;hsa-mir-412,101065465,101065487,+	24.8128	22.5411
hsa-miR-323b-3p	18	201	201	24.09	21.89	14:hsa;hsa-mir-323b,101056269,101056290,+	24.0936	21.8878
hsa-miR-708-5p	24	198	198	23.73	21.56	11:hsa;hsa-mir-708,79402032,79402054,-	23.734	21.5611
hsa-let-7a-3p	18	198	100	23.73	21.56	9:hsa;hsa-let-7a-1,94176013,94176033,+	11.9869	10.8894
hsa-let-7a-3p	16	196	98	23.49	21.34	22:hsa;hsa-let-7a-3,46112800,46112820,+	11.7471	10.6717
hsa-miR-9985	9	188	91.17	22.54	20.47	Y:hsa;hsa-mir-9985,4606140,4606158,+	10.928	9.92754
hsa-miR-628-5p	26	186	186	22.3	20.25	15:hsa;hsa-mir-628,55372962,55372983,-	22.2956	20.2544
hsa-miR-874-3p	23	183	183	21.94	19.93	5:hsa;hsa-mir-874,137647618,137647639,-	21.936	19.9277
hsa-miR-17-3p	27	182	182	21.82	19.82	13:hsa;hsa-mir-17,91350655,91350676,+	21.8161	19.8188
hsa-miR-576-5p	9	180	180	21.58	19.6	4:hsa;hsa-mir-576,109488713,109488734,+	21.5764	19.601
hsa-miR-3605-3p	29	178	178	21.34	19.38	1:hsa;hsa-mir-3605,33332458,33332480,-	21.3366	19.3832
hsa-miR-138-1-3p	12	178	178	21.34	19.38	3:hsa;hsa-mir-138-1,44114274,44114295,+	21.3366	19.3832
hsa-miR-590-3p	13	178	178	21.34	19.38	7:hsa;hsa-mir-590,74191253,74191273,+	21.3366	19.3832
hsa-miR-3117-3p	37	169	169	20.26	18.4	1:hsa;hsa-mir-3117,66628485,66628505,+	20.2578	18.4032
hsa-miR-1843	35	165	165	19.78	17.97	1:hsa;hsa-mir-1843,175968390,175968409,-	19.7784	17.9676
hsa-miR-382-3p	9	162	162	19.42	17.64	14:hsa;hsa-mir-382,101054352,101054372,+	19.4187	17.6409
hsa-miR-1185-2-3p	26	162	128	19.42	17.64	14:hsa;hsa-mir-1185-2,101044250,101044271,+	15.3432	13.9385
hsa-miR-502-3p	14	162	86.5	19.42	17.64	X:hsa;hsa-mir-502,50014649,50014670,+	10.3687	9.41937
hsa-miR-34b-5p	14	159	159	19.06	17.31	11:hsa;hsa-mir-34b,111512950,111512972,+	19.0591	17.3142
hsa-miR-2355-5p	33	157	157	18.82	17.1	2:hsa;hsa-mir-2355,207109997,207110017,-	18.8194	17.0964
hsa-miR-4677-3p	9	156	156	18.7	16.99	1:hsa;hsa-mir-4677,243346225,243346246,+	18.6995	16.9875
hsa-miR-548o-3p	8	155	77.5	18.58	16.88	7:hsa;hsa-mir-548o,102405828,102405849,-	9.28983	8.43932
hsa-miR-548o-3p	8	155	77.5	18.58	16.88	20:hsa;hsa-mir-548o-2,38516607,38516628,+	9.28983	8.43932
hsa-miR-549a-3p	18	155	155	18.58	16.88	15:hsa;hsa-mir-549a,80842038,80842058,-	18.5797	16.8786
hsa-let-7f-2-3p	7	154	154	18.46	16.77	X:hsa;hsa-let-7f-2,53557249,53557270,-	18.4598	16.7697
hsa-miR-7977	8	154	154	18.46	16.77	3:hsa;hsa-mir-7977,176515103,176515120,+	18.4598	16.7697
hsa-miR-433-3p	26	152	152	18.22	16.55	14:hsa;hsa-mir-433,100881949,100881970,+	18.2201	16.552
hsa-miR-374b-3p	10	150	150	17.98	16.33	X:hsa;hsa-mir-374b,74218587,74218608,-	17.9803	16.3342
hsa-miR-148a-5p	11	149	149	17.86	16.23	7:hsa;hsa-mir-148a,25949924,25949945,-	17.8604	16.2253
hsa-miR-3909	14	149	149	17.86	16.23	22:hsa;hsa-mir-3909,35335710,35335731,+	17.8604	16.2253
hsa-miR-196a-3p	12	144	144	17.26	15.68	12:hsa;hsa-mir-196a-2,53991799,53991820,+	17.2611	15.6808
hsa-miR-191-3p	17	143	143	17.14	15.57	3:hsa;hsa-mir-191,49020675,49020696,-	17.1412	15.5719
hsa-miR-877-5p	32	141	141	16.9	15.35	6:hsa;hsa-mir-877,30584332,30584351,+	16.9015	15.3541
hsa-miR-625-5p	9	140	140	16.78	15.25	14:hsa;hsa-mir-625,65471116,65471136,+	16.7816	15.2452
hsa-miR-598-3p	17	137	137	16.42	14.92	8:hsa;hsa-mir-598,11035266,11035287,-	16.422	14.9185
hsa-miR-425-3p	30	135	135	16.18	14.7	3:hsa;hsa-mir-425,49020202,49020223,-	16.1823	14.7007
hsa-miR-652-3p	20	131	131	15.7	14.27	X:hsa;hsa-mir-652,110055389,110055409,+	15.7028	14.2652
hsa-miR-212-5p	15	128	128	15.34	13.94	17:hsa;hsa-mir-212,2050301,2050323,-	15.3432	13.9385
hsa-miR-195-5p	9	127	125.67	15.22	13.83	17:hsa;hsa-mir-195,7017629,7017649,-	15.0635	13.6844
hsa-miR-339-5p	14	126	126	15.1	13.72	7:hsa;hsa-mir-339,1022947,1022969,-	15.1035	13.7207
hsa-miR-324-3p	29	124	124	14.86	13.5	17:hsa;hsa-mir-324,7223346,7223368,-	14.8637	13.5029
hsa-miR-128-1-5p	9	121	121	14.5	13.18	2:hsa;hsa-mir-128-1,135665411,135665433,+	14.5041	13.1762
hsa-miR-7974	8	120	120	14.38	13.07	19:hsa;hsa-mir-7974,11495599,11495622,-	14.3843	13.0673
hsa-miR-328-3p	25	117	117	14.02	12.74	16:hsa;hsa-mir-328,67202368,67202389,-	14.0246	12.7406
hsa-miR-542-5p	15	116	116	13.9	12.63	X:hsa;hsa-mir-542,134541356,134541378,-	13.9048	12.6318
hsa-miR-29b-1-5p	17	115	115	13.78	12.52	7:hsa;hsa-mir-29b-1,130877468,130877491,-	13.7849	12.5229
hsa-miR-380-3p	7	115	115	13.78	12.52	14:hsa;hsa-mir-380,101025056,101025077,+	13.7849	12.5229
hsa-miR-379-5p	17	115	115	13.78	12.52	14:hsa;hsa-mir-379,101022071,101022091,+	13.7849	12.5229
hsa-miR-942-5p	20	115	115	13.78	12.52	1:hsa;hsa-mir-942,117094655,117094676,+	13.7849	12.5229
hsa-miR-1185-5p	4	114	57	13.67	12.41	14:hsa;hsa-mir-1185-2,101044212,101044232,+	6.83252	6.20698
hsa-miR-1185-5p	4	114	57	13.67	12.41	14:hsa;hsa-mir-1185-1,101042991,101043011,+	6.83252	6.20698
hsa-miR-18a-5p	13	113	106	13.55	12.31	13:hsa;hsa-mir-18a,91350756,91350778,+	12.7061	11.5428
hsa-miR-340-3p	16	113	113	13.55	12.31	5:hsa;hsa-mir-340,180015360,180015381,-	13.5452	12.3051
hsa-miR-376b-3p	14	110	109.33	13.19	11.98	14:hsa;hsa-mir-376b,101040497,101040518,+	13.1057	11.9058
hsa-miR-495-3p	15	107	107	12.83	11.65	14:hsa;hsa-mir-495,101033804,101033825,+	12.826	11.6517
hsa-miR-497-5p	8	107	107	12.83	11.65	17:hsa;hsa-mir-497,7017934,7017954,-	12.826	11.6517
hsa-miR-33b-5p	5	106	105.5	12.71	11.54	17:hsa;hsa-mir-33b,17813851,17813870,-	12.6462	11.4884
hsa-miR-1296-5p	22	103	103	12.35	11.22	10:hsa;hsa-mir-1296,63372972,63372993,-	12.3465	11.2161
hsa-miR-485-3p	16	101	101	12.11	11	14:hsa;hsa-mir-485,101055464,101055485,+	12.1067	10.9983
hsa-miR-505-3p	17	101	101	12.11	11	X:hsa;hsa-mir-505,139924198,139924219,-	12.1067	10.9983
hsa-miR-370-5p	17	100	100	11.99	10.89	14:hsa;hsa-mir-370,100911151,100911172,+	11.9869	10.8894
hsa-miR-766-3p	12	100	100	11.99	10.89	X:hsa;hsa-mir-766,119646802,119646823,-	11.9869	10.8894
hsa-miR-671-5p	23	100	100	11.99	10.89	7:hsa;hsa-mir-671,151238449,151238471,+	11.9869	10.8894
hsa-miR-337-5p	16	98	98	11.75	10.67	14:hsa;hsa-mir-337,100874515,100874535,+	11.7471	10.6717
hsa-miR-296-3p	28	98	98	11.75	10.67	20:hsa;hsa-mir-296,58817662,58817683,-	11.7471	10.6717
hsa-miR-12135	3	96	96	11.51	10.45	15:hsa;hsa-mir-12135,73299962,73299979,+	11.5074	10.4539
hsa-miR-146b-3p	14	93	93	11.15	10.13	10:hsa;hsa-mir-146b,102436557,102436578,+	11.1478	10.1272
hsa-miR-409-5p	17	92	92	11.03	10.02	14:hsa;hsa-mir-409,101065314,101065336,+	11.0279	10.0183
hsa-miR-3158-3p	15	91	45.5	10.91	9.91	10:hsa;hsa-mir-3158-2,101601466,101601487,-	5.45403	4.9547
hsa-miR-3158-3p	15	91	45.5	10.91	9.91	10:hsa;hsa-mir-3158-1,101601466,101601487,+	5.45403	4.9547
hsa-miR-32-5p	6	91	91	10.91	9.91	9:hsa;hsa-mir-32,109046234,109046255,-	10.9081	9.90939
hsa-miR-25-5p	8	90	90	10.79	9.8	7:hsa;hsa-mir-25,100093573,100093593,-	10.7882	9.8005
hsa-miR-215-5p	12	89	89	10.67	9.69	1:hsa;hsa-mir-215,220117879,220117899,-	10.6683	9.69161
hsa-miR-3605-5p	23	88	88	10.55	9.58	1:hsa;hsa-mir-3605,33332414,33332436,-	10.5485	9.58271
hsa-miR-887-5p	19	88	88	10.55	9.58	5:hsa;hsa-mir-887,15935191,15935211,+	10.5485	9.58271
hsa-miR-329-3p	38	86	43	10.31	9.36	14:hsa;hsa-mir-329-1,101026834,101026855,+	5.15436	4.68246
hsa-miR-4746-5p	15	86	86	10.31	9.36	19:hsa;hsa-mir-4746,4445987,4446009,+	10.3087	9.36492
hsa-miR-1197	3	86	86	10.31	9.36	14:hsa;hsa-mir-1197,101025620,101025640,+	10.3087	9.36492
hsa-miR-181b-3p	20	86	86	10.31	9.36	1:hsa;hsa-mir-181b-1,198858948,198858968,-	10.3087	9.36492
hsa-miR-329-3p	38	86	43	10.31	9.36	14:hsa;hsa-mir-329-2,101027151,101027172,+	5.15436	4.68246
hsa-let-7e-3p	11	85	85	10.19	9.26	19:hsa;hsa-let-7e,51692838,51692859,+	10.1888	9.25603
hsa-miR-324-5p	19	85	85	10.19	9.26	17:hsa;hsa-mir-324,7223312,7223333,-	10.1888	9.25603
hsa-miR-93-3p	24	84	84	10.07	9.15	7:hsa;hsa-mir-93,100093817,100093838,-	10.069	9.14713
hsa-miR-330-3p	34	79	79	9.47	8.6	19:hsa;hsa-mir-330,45639050,45639072,-	9.46963	8.60266
hsa-miR-656-3p	11	78	78	9.35	8.49	14:hsa;hsa-mir-656,101066766,101066786,+	9.34977	8.49377
hsa-miR-659-5p	12	76	76	9.11	8.28	22:hsa;hsa-mir-659,37847699,37847720,-	9.11003	8.27598
hsa-miR-550a-5p	19	75	37.33	8.99	8.17	7:hsa;hsa-mir-550a-2,32733002,32733024,+	4.4751	4.06539
hsa-miR-550a-5p	19	75	37.33	8.99	8.17	7:hsa;hsa-mir-550a-1,30289815,30289837,+	4.4751	4.06539
hsa-miR-7-1-3p	16	74	74	8.87	8.06	9:hsa;hsa-mir-7-1,83969813,83969834,-	8.87029	8.05819
hsa-miR-101-5p	9	74	74	8.87	8.06	1:hsa;hsa-mir-101-1,65058444,65058465,-	8.87029	8.05819
hsa-miR-1271-5p	14	74	74	8.87	8.06	5:hsa;hsa-mir-1271,176367960,176367981,+	8.87029	8.05819
hsa-miR-3661	22	71	71	8.51	7.73	5:hsa;hsa-mir-3661,134225777,134225798,+	8.51068	7.73151
hsa-miR-224-3p	21	71	71	8.51	7.73	X:hsa;hsa-mir-224,151958630,151958652,-	8.51068	7.73151
hsa-miR-501-3p	11	70	70	8.39	7.62	X:hsa;hsa-mir-501,50009772,50009793,+	8.39082	7.62261
hsa-miR-99a-3p	10	70	70	8.39	7.62	21:hsa;hsa-mir-99a,16539138,16539159,+	8.39082	7.62261
hsa-miR-4435	13	69	17.25	8.27	7.51	2:hsa;hsa-mir-4435-2,87629764,87629785,+	2.06774	1.87843
hsa-miR-4435	13	69	17.25	8.27	7.51	2:hsa;hsa-mir-4435-1,87629764,87629785,+	2.06774	1.87843
hsa-miR-4435	13	69	17.25	8.27	7.51	2:hsa;hsa-mir-4435-2,111321017,111321038,-	2.06774	1.87843
hsa-miR-4435	13	69	17.25	8.27	7.51	2:hsa;hsa-mir-4435-1,111321021,111321042,-	2.06774	1.87843
hsa-let-7b-3p	7	69	69	8.27	7.51	22:hsa;hsa-let-7b,46113745,46113766,+	8.27095	7.51372
hsa-miR-29c-5p	21	65	65	7.79	7.08	1:hsa;hsa-mir-29c,207801867,207801888,-	7.79147	7.07814
hsa-miR-365b-5p	20	63	63	7.55	6.86	17:hsa;hsa-mir-365b,31575439,31575460,+	7.55173	6.86035
hsa-miR-3912-3p	17	62	62	7.43	6.75	5:hsa;hsa-mir-3912,171386718,171386738,-	7.43187	6.75146
hsa-miR-190a-5p	8	62	62	7.43	6.75	15:hsa;hsa-mir-190a,62823971,62823992,+	7.43187	6.75146
hsa-miR-548e-3p	20	62	62	7.43	6.75	10:hsa;hsa-mir-548e,110988978,110988999,+	7.43187	6.75146
hsa-miR-2277-5p	11	60	60	7.19	6.53	5:hsa;hsa-mir-2277,93620713,93620736,-	7.19213	6.53367
hsa-miR-331-5p	21	58	58	6.95	6.32	12:hsa;hsa-mir-331,95308445,95308466,+	6.95239	6.31588
hsa-miR-15b-3p	11	58	58	6.95	6.32	3:hsa;hsa-mir-15b,160404645,160404666,+	6.95239	6.31588
hsa-miR-299-5p	8	57	57	6.83	6.21	14:hsa;hsa-mir-299,101023800,101023821,+	6.83252	6.20698
hsa-miR-3176	19	57	57	6.83	6.21	16:hsa;hsa-mir-3176,543336,543354,+	6.83252	6.20698
hsa-miR-486-3p	10	56	32	6.71	6.1	8:hsa;hsa-mir-486-1,41660486,41660506,-	3.8358	3.48462
hsa-miR-4521	9	55	55	6.59	5.99	17:hsa;hsa-mir-4521,8186948,8186969,+	6.59278	5.98919
hsa-miR-185-3p	12	53	53	6.35	5.77	22:hsa;hsa-mir-185,20033188,20033209,+	6.35305	5.77141
hsa-miR-1301-3p	20	53	53	6.35	5.77	2:hsa;hsa-mir-1301,25328687,25328710,-	6.35305	5.77141
hsa-miR-496	8	52	52	6.23	5.66	14:hsa;hsa-mir-496,101060628,101060649,+	6.23318	5.66251
hsa-miR-4326	7	52	52	6.23	5.66	20:hsa;hsa-mir-4326,63286818,63286837,+	6.23318	5.66251
hsa-miR-589-3p	14	51	51	6.11	5.55	7:hsa;hsa-mir-589,5495879,5495902,-	6.11331	5.55362
hsa-let-7i-3p	6	50	50	5.99	5.44	12:hsa;hsa-let-7i,62603747,62603768,+	5.99344	5.44472
hsa-miR-320c	19	49	11.92	5.87	5.34	18:hsa;hsa-mir-320c-2,24321716,24321735,+	1.42901	1.29818
hsa-miR-34a-3p	8	49	49	5.87	5.34	1:hsa;hsa-mir-34a,9151731,9151752,-	5.87357	5.33583
hsa-miR-31-3p	16	49	49	5.87	5.34	9:hsa;hsa-mir-31,21512158,21512179,-	5.87357	5.33583
hsa-miR-486-3p	6	48	24	5.75	5.23	8:hsa;hsa-mir-486-2,41660486,41660506,+	2.87685	2.61347
hsa-miR-664a-3p	10	47	47	5.63	5.12	1:hsa;hsa-mir-664a,220200586,220200608,-	5.63383	5.11804
hsa-miR-320c	18	47	11.25	5.63	5.12	18:hsa;hsa-mir-320c-1,21683559,21683578,+	1.34909	1.22558
hsa-miR-627-5p	7	47	47	5.63	5.12	15:hsa;hsa-mir-627,42199585,42199606,-	5.63383	5.11804
hsa-miR-320d	16	47	23.9	5.63	5.12	13:hsa;hsa-mir-320d-1,40727857,40727875,-	2.86543	2.6031
hsa-miR-183-5p	15	47	47	5.63	5.12	7:hsa;hsa-mir-183,129774931,129774952,-	5.63383	5.11804
hsa-miR-24-1-5p	13	46	46	5.51	5.01	9:hsa;hsa-mir-24-1,95086027,95086048,+	5.51396	5.00914
hsa-miR-3126-5p	8	46	46	5.51	5.01	2:hsa;hsa-mir-3126,69103691,69103712,+	5.51396	5.00914
hsa-miR-9903	12	45	45	5.39	4.9	8:hsa;hsa-mir-9903,98393695,98393716,-	5.3941	4.90025
hsa-miR-362-5p	7	45	45	5.39	4.9	X:hsa;hsa-mir-362,50008968,50008991,+	5.3941	4.90025
hsa-let-7g-3p	9	45	45	5.39	4.9	3:hsa;hsa-let-7g,52268339,52268359,-	5.3941	4.90025
hsa-miR-181b-2-3p	16	44	44	5.27	4.79	9:hsa;hsa-mir-181b-2,124693763,124693782,+	5.27423	4.79136
hsa-miR-5000-3p	10	43	43	5.15	4.68	2:hsa;hsa-mir-5000,75090873,75090894,+	5.15436	4.68246
hsa-miR-33a-5p	11	43	42.5	5.15	4.68	22:hsa;hsa-mir-33a,41900949,41900969,+	5.09442	4.62801
hsa-miR-5100	1	42	42	5.03	4.57	10:hsa;hsa-mir-5100,42997630,42997651,+	5.03449	4.57357
hsa-miR-26a-2-3p	3	42	42	5.03	4.57	12:hsa;hsa-mir-26a-2,57824660,57824681,-	5.03449	4.57357
hsa-miR-548e-5p	10	42	42	5.03	4.57	10:hsa;hsa-mir-548e,110988940,110988961,+	5.03449	4.57357
hsa-miR-3677-3p	4	40	40	4.79	4.36	16:hsa;hsa-mir-3677,2270751,2270772,+	4.79475	4.35578
hsa-miR-137-3p	20	40	40	4.79	4.36	1:hsa;hsa-mir-137,98046128,98046150,-	4.79475	4.35578
hsa-miR-134-3p	13	39	39	4.67	4.25	14:hsa;hsa-mir-134,101054732,101054754,+	4.67488	4.24688
hsa-miR-193a-5p	10	39	39	4.67	4.25	17:hsa;hsa-mir-193a,31560016,31560037,+	4.67488	4.24688
hsa-miR-616-5p	3	39	39	4.67	4.25	12:hsa;hsa-mir-616,57519178,57519199,-	4.67488	4.24688
hsa-miR-618	5	39	39	4.67	4.25	12:hsa;hsa-mir-618,80935751,80935773,-	4.67488	4.24688
hsa-miR-615-5p	9	38	38	4.56	4.14	12:hsa;hsa-mir-615,54033967,54033988,+	4.55501	4.13799
hsa-miR-378c	5	38	17.25	4.56	4.14	10:hsa;hsa-mir-378c,130962598,130962622,-	2.06774	1.87843
hsa-miR-10399-5p	6	38	38	4.56	4.14	7:hsa;hsa-mir-10399,139044100,139044120,-	4.55501	4.13799
hsa-miR-2467-5p	4	38	38	4.56	4.14	2:hsa;hsa-mir-2467,239351735,239351757,-	4.55501	4.13799
hsa-let-7f-1-3p	2	37	37	4.44	4.03	9:hsa;hsa-let-7f-1,94176409,94176430,+	4.43515	4.02909
hsa-miR-5699-5p	11	37	37	4.44	4.03	10:hsa;hsa-mir-5699,641698,641719,-	4.43515	4.02909
hsa-miR-6852-5p	19	36	36	4.32	3.92	9:hsa;hsa-mir-6852,35710681,35710701,-	4.31528	3.9202
hsa-miR-329-5p	7	36	18	4.32	3.92	14:hsa;hsa-mir-329-1,101026797,101026819,+	2.15764	1.9601
hsa-miR-219a-1-3p	11	36	36	4.32	3.92	6:hsa;hsa-mir-219a-1,33207896,33207917,+	4.31528	3.9202
hsa-miR-329-5p	7	36	18	4.32	3.92	14:hsa;hsa-mir-329-2,101027114,101027136,+	2.15764	1.9601
hsa-miR-34c-3p	11	35	35	4.2	3.81	11:hsa;hsa-mir-34c,111513484,111513505,+	4.19541	3.81131
hsa-miR-744-3p	8	35	35	4.2	3.81	17:hsa;hsa-mir-744,12081966,12081987,+	4.19541	3.81131
hsa-miR-142-5p	8	35	35	4.2	3.81	17:hsa;hsa-mir-142,58331247,58331267,-	4.19541	3.81131
hsa-miR-6500-3p	9	33	33	3.96	3.59	1:hsa;hsa-mir-6500,51060072,51060092,+	3.95567	3.59352
hsa-miR-539-5p	7	33	33	3.96	3.59	14:hsa;hsa-mir-539,101047329,101047350,+	3.95567	3.59352
hsa-miR-6716-3p	14	32	32	3.84	3.48	11:hsa;hsa-mir-6716,118644048,118644069,+	3.8358	3.48462
hsa-miR-550a-3p	12	32	10.67	3.84	3.48	7:hsa;hsa-mir-550a-2,32733041,32733062,+	1.2786	1.16154
hsa-miR-320d	10	32	9.57	3.84	3.48	X:hsa;hsa-mir-320d-2,140926201,140926219,-	1.14732	1.04228
hsa-miR-627-3p	5	32	32	3.84	3.48	15:hsa;hsa-mir-627,42199624,42199643,-	3.8358	3.48462
hsa-miR-200b-3p	7	32	32	3.84	3.48	1:hsa;hsa-mir-200b,1167160,1167181,+	3.8358	3.48462
hsa-miR-550a-3p	12	32	10.67	3.84	3.48	7:hsa;hsa-mir-550a-3,29680793,29680814,-	1.2786	1.16154
hsa-miR-10399-3p	6	32	32	3.84	3.48	7:hsa;hsa-mir-10399,139044137,139044157,-	3.8358	3.48462
hsa-miR-550a-3p	12	32	10.67	3.84	3.48	7:hsa;hsa-mir-550a-1,30289854,30289875,+	1.2786	1.16154
hsa-miR-433-5p	6	31	31	3.72	3.38	14:hsa;hsa-mir-433,100881897,100881918,+	3.71593	3.37573
hsa-miR-188-5p	7	31	31	3.72	3.38	X:hsa;hsa-mir-188,50003517,50003537,+	3.71593	3.37573
hsa-miR-218-1-3p	10	30	30	3.6	3.27	4:hsa;hsa-mir-218-1,20528342,20528363,+	3.59606	3.26683
hsa-miR-874-5p	9	30	30	3.6	3.27	5:hsa;hsa-mir-874,137647581,137647603,-	3.59606	3.26683
hsa-miR-758-5p	8	30	30	3.6	3.27	14:hsa;hsa-mir-758,101026034,101026055,+	3.59606	3.26683
hsa-let-7d-3p	5	29	29	3.48	3.16	9:hsa;hsa-let-7d,94178895,94178916,+	3.47619	3.15794
hsa-miR-32-3p	4	29	29	3.48	3.16	9:hsa;hsa-mir-32,109046275,109046296,-	3.47619	3.15794
hsa-miR-940	7	28	28	3.36	3.05	16:hsa;hsa-mir-940,2271806,2271826,+	3.35633	3.04904
hsa-miR-376a-2-5p	7	28	28	3.36	3.05	14:hsa;hsa-mir-376a-2,101040080,101040100,+	3.35633	3.04904
hsa-let-7a-2-3p	10	28	28	3.36	3.05	11:hsa;hsa-let-7a-2,122146571,122146592,-	3.35633	3.04904
hsa-miR-185-5p	7	27	27	3.24	2.94	22:hsa;hsa-mir-185,20033153,20033174,+	3.23646	2.94015
hsa-miR-3129-3p	10	27	27	3.24	2.94	2:hsa;hsa-mir-3129,189133082,189133103,-	3.23646	2.94015
hsa-miR-532-3p	7	27	27	3.24	2.94	X:hsa;hsa-mir-532,50003204,50003225,+	3.23646	2.94015
hsa-miR-193b-5p	13	25	25	3	2.72	16:hsa;hsa-mir-193b,14303980,14304001,+	2.99672	2.72236
hsa-miR-3129-5p	9	24	24	2.88	2.61	2:hsa;hsa-mir-3129,189133044,189133065,-	2.87685	2.61347
hsa-miR-5699-3p	9	24	24	2.88	2.61	10:hsa;hsa-mir-5699,641747,641768,-	2.87685	2.61347
hsa-miR-3613-5p	4	23	23	2.76	2.5	13:hsa;hsa-mir-3613,49996430,49996451,-	2.75698	2.50457
hsa-miR-33b-3p	4	23	23	2.76	2.5	17:hsa;hsa-mir-33b,17813889,17813910,-	2.75698	2.50457
hsa-miR-30b-3p	4	22	22	2.64	2.4	8:hsa;hsa-mir-30b,134800574,134800595,-	2.63711	2.39568
hsa-miR-26a-1-3p	3	22	22	2.64	2.4	3:hsa;hsa-mir-26a-1,37969452,37969473,+	2.63711	2.39568
hsa-miR-3913-5p	8	22	11	2.64	2.4	12:hsa;hsa-mir-3913-2,69584744,69584765,+	1.31856	1.19784
hsa-miR-3913-5p	8	22	11	2.64	2.4	12:hsa;hsa-mir-3913-1,69584744,69584765,-	1.31856	1.19784
hsa-miR-210-5p	2	22	22	2.64	2.4	11:hsa;hsa-mir-210,568116,568137,-	2.63711	2.39568
hsa-miR-655-5p	6	22	22	2.64	2.4	14:hsa;hsa-mir-655,101049572,101049593,+	2.63711	2.39568
hsa-miR-141-3p	3	21	21	2.52	2.29	12:hsa;hsa-mir-141,6964155,6964176,+	2.51724	2.28678
hsa-miR-326	4	21	21	2.52	2.29	11:hsa;hsa-mir-326,75335151,75335170,-	2.51724	2.28678
hsa-miR-2682-5p	6	21	21	2.52	2.29	1:hsa;hsa-mir-2682,98045264,98045286,-	2.51724	2.28678
hsa-miR-580-3p	6	21	21	2.52	2.29	5:hsa;hsa-mir-580,36147952,36147973,-	2.51724	2.28678
hsa-miR-770-5p	6	20	20	2.4	2.18	14:hsa;hsa-mir-770,100852409,100852431,+	2.39738	2.17789
hsa-miR-197-3p	4	20	20	2.4	2.18	1:hsa;hsa-mir-197,109598940,109598961,+	2.39738	2.17789
hsa-miR-342-5p	13	20	20	2.4	2.18	14:hsa;hsa-mir-342,100109673,100109693,+	2.39738	2.17789
hsa-miR-4454	5	20	20	2.4	2.18	4:hsa;hsa-mir-4454,163093576,163093595,-	2.39738	2.17789
hsa-miR-4636	8	20	20	2.4	2.18	5:hsa;hsa-mir-4636,9053825,9053846,-	2.39738	2.17789
hsa-miR-92a-1-5p	2	20	20	2.4	2.18	13:hsa;hsa-mir-92a-1,91351324,91351346,+	2.39738	2.17789
hsa-miR-655-3p	8	20	20	2.4	2.18	14:hsa;hsa-mir-655,101049610,101049631,+	2.39738	2.17789
hsa-miR-33a-3p	9	20	20	2.4	2.18	22:hsa;hsa-mir-33a,41900989,41901010,+	2.39738	2.17789
hsa-miR-3174	8	19	19	2.28	2.07	15:hsa;hsa-mir-3174,90006764,90006786,+	2.27751	2.06899
hsa-miR-154-3p	8	19	19	2.28	2.07	14:hsa;hsa-mir-154,101059805,101059826,+	2.27751	2.06899
hsa-miR-4645-3p	7	19	19	2.28	2.07	6:hsa;hsa-mir-4645,2854077,2854098,-	2.27751	2.06899
hsa-miR-2355-3p	9	19	19	2.28	2.07	2:hsa;hsa-mir-2355,207110040,207110061,-	2.27751	2.06899
hsa-miR-628-3p	9	19	19	2.28	2.07	15:hsa;hsa-mir-628,55373000,55373020,-	2.27751	2.06899
hsa-miR-664a-5p	11	18	18	2.16	1.96	1:hsa;hsa-mir-664a,220200548,220200571,-	2.15764	1.9601
hsa-miR-196b-3p	6	18	18	2.16	1.96	7:hsa;hsa-mir-196b,27169529,27169550,-	2.15764	1.9601
hsa-miR-3622a-5p	8	18	18	2.16	1.96	8:hsa;hsa-mir-3622a,27701690,27701711,+	2.15764	1.9601
hsa-miR-34b-3p	9	18	18	2.16	1.96	11:hsa;hsa-mir-34b,111512987,111513008,+	2.15764	1.9601
hsa-miR-548n	6	17	16.5	2.04	1.85	7:hsa;hsa-mir-548n,34940769,34940790,-	1.97784	1.79676
hsa-miR-769-3p	4	17	17	2.04	1.85	19:hsa;hsa-mir-769,46019000,46019022,+	2.03777	1.85121
hsa-miR-889-5p	2	17	17	2.04	1.85	14:hsa;hsa-mir-889,101047911,101047932,+	2.03777	1.85121
hsa-miR-18a-3p	4	17	17	2.04	1.85	13:hsa;hsa-mir-18a,91350797,91350819,+	2.03777	1.85121
hsa-miR-582-3p	6	17	17	2.04	1.85	5:hsa;hsa-mir-582,59703658,59703679,-	2.03777	1.85121
hsa-miR-488-3p	4	16	16	1.92	1.74	1:hsa;hsa-mir-488,177029414,177029434,-	1.9179	1.74231
hsa-miR-494-5p	6	16	16	1.92	1.74	14:hsa;hsa-mir-494,101029648,101029670,+	1.9179	1.74231
hsa-miR-629-5p	5	16	16	1.92	1.74	15:hsa;hsa-mir-629,70079393,70079413,-	1.9179	1.74231
hsa-miR-487a-5p	5	15	15	1.8	1.63	14:hsa;hsa-mir-487a,101052458,101052479,+	1.79803	1.63342
hsa-miR-3934-5p	9	15	15	1.8	1.63	6:hsa;hsa-mir-3934,33698152,33698173,+	1.79803	1.63342
hsa-miR-625-3p	11	15	15	1.8	1.63	14:hsa;hsa-mir-625,65471153,65471174,+	1.79803	1.63342
hsa-miR-483-3p	11	15	15	1.8	1.63	11:hsa;hsa-mir-483,2134181,2134201,-	1.79803	1.63342
hsa-miR-4662a-5p	2	14	14	1.68	1.52	8:hsa;hsa-mir-4662a,124821990,124822011,+	1.67816	1.52452
hsa-miR-4785	7	14	14	1.68	1.52	2:hsa;hsa-mir-4785,160407853,160407873,-	1.67816	1.52452
hsa-miR-937-3p	8	14	14	1.68	1.52	8:hsa;hsa-mir-937,143813007,143813028,-	1.67816	1.52452
hsa-miR-18b-5p	5	14	7	1.68	1.52	X:hsa;hsa-mir-18b,134170046,134170068,-	0.839082	0.762261
hsa-miR-3928-3p	8	14	14	1.68	1.52	22:hsa;hsa-mir-3928,31160098,31160119,-	1.67816	1.52452
hsa-miR-548al	8	14	14	1.68	1.52	11:hsa;hsa-mir-548al,74399301,74399322,+	1.67816	1.52452
hsa-miR-7705	5	13	13	1.56	1.42	8:hsa;hsa-mir-7705,100702968,100702990,-	1.55829	1.41563
hsa-miR-3065-3p	4	13	13	1.56	1.42	17:hsa;hsa-mir-3065,81125926,81125948,+	1.55829	1.41563
hsa-miR-651-5p	3	13	13	1.56	1.42	X:hsa;hsa-mir-651,8126980,8127001,+	1.55829	1.41563
hsa-miR-585-3p	7	13	13	1.56	1.42	5:hsa;hsa-mir-585,169263661,169263679,-	1.55829	1.41563
hsa-miR-5002-5p	9	13	13	1.56	1.42	3:hsa;hsa-mir-5002,124132949,124132972,+	1.55829	1.41563
hsa-miR-1276	3	13	13	1.56	1.42	15:hsa;hsa-mir-1276,85770507,85770526,-	1.55829	1.41563
hsa-miR-20a-3p	6	13	13	1.56	1.42	13:hsa;hsa-mir-20a,91351108,91351129,+	1.55829	1.41563
hsa-miR-130a-5p	6	13	13	1.56	1.42	11:hsa;hsa-mir-130a,57641212,57641233,+	1.55829	1.41563
hsa-miR-92b-5p	7	13	13	1.56	1.42	1:hsa;hsa-mir-92b,155195196,155195217,+	1.55829	1.41563
hsa-miR-186-3p	2	12	12	1.44	1.31	1:hsa;hsa-mir-186,71067684,71067705,-	1.43843	1.30673
hsa-miR-129-5p	5	12	6.5	1.44	1.31	11:hsa;hsa-mir-129-2,43581408,43581428,+	0.779147	0.707814
hsa-miR-4421	6	12	12	1.44	1.31	1:hsa;hsa-mir-4421,51059879,51059900,+	1.43843	1.30673
hsa-miR-1305	6	12	12	1.44	1.31	4:hsa;hsa-mir-1305,182169343,182169364,+	1.43843	1.30673
hsa-miR-545-5p	4	12	12	1.44	1.31	X:hsa;hsa-mir-545,74287128,74287149,-	1.43843	1.30673
hsa-miR-450a-2-3p	7	12	12	1.44	1.31	X:hsa;hsa-mir-450a-2,134540565,134540586,-	1.43843	1.30673
hsa-miR-3200-3p	3	12	12	1.44	1.31	22:hsa;hsa-mir-3200,30731610,30731631,+	1.43843	1.30673
hsa-miR-483-5p	7	12	12	1.44	1.31	11:hsa;hsa-mir-483,2134141,2134162,-	1.43843	1.30673
hsa-miR-1255a	4	12	12	1.44	1.31	4:hsa;hsa-mir-1255a,101330329,101330351,-	1.43843	1.30673
hsa-miR-1295a	8	12	12	1.44	1.31	1:hsa;hsa-mir-1295a,171101776,171101796,-	1.43843	1.30673
hsa-miR-548u	3	12	12	1.44	1.31	6:hsa;hsa-mir-548u,57390180,57390202,+	1.43843	1.30673
hsa-miR-6840-5p	7	12	12	1.44	1.31	7:hsa;hsa-mir-6840,100356656,100356679,+	1.43843	1.30673
hsa-miR-6514-5p	8	12	12	1.44	1.31	11:hsa;hsa-mir-6514,62792702,62792724,-	1.43843	1.30673
hsa-miR-1294	4	12	12	1.44	1.31	5:hsa;hsa-mir-1294,154347153,154347174,+	1.43843	1.30673
hsa-miR-6770-3p	5	11	1.22	1.32	1.2	16:hsa;hsa-mir-6770-2,14930859,14930879,+	0.146506	0.133093
hsa-miR-3691-5p	8	11	11	1.32	1.2	6:hsa;hsa-mir-3691,5148247,5148269,-	1.31856	1.19784
hsa-miR-133a-3p	3	11	5.5	1.32	1.2	20:hsa;hsa-mir-133a-2,62564970,62564991,+	0.659278	0.598919
hsa-miR-10401-3p	2	11	1.38	1.32	1.2	21:hsa;hsa-mir-10401,8433832,8433852,+	0.16482	0.14973
hsa-miR-10401-3p	2	11	1.38	1.32	1.2	21:hsa;hsa-mir-10401,8250807,8250827,+	0.16482	0.14973
hsa-miR-9-5p	4	11	3.67	1.32	1.2	5:hsa;hsa-mir-9-2,88666868,88666890,-	0.439519	0.39928
hsa-miR-10401-3p	2	11	1.38	1.32	1.2	GL000220.1:hsa;hsa-mir-10401,150006,150026,+	0.16482	0.14973
hsa-miR-6770-3p	5	11	1.22	1.32	1.2	16:hsa;hsa-mir-6770-2,18379390,18379410,-	0.146506	0.133093
hsa-miR-6770-3p	5	11	1.22	1.32	1.2	16:hsa;hsa-mir-6770-2,16329344,16329364,+	0.146506	0.133093
hsa-miR-10401-3p	2	11	1.38	1.32	1.2	KI270733.1:hsa;hsa-mir-10401,167966,167986,+	0.16482	0.14973
hsa-miR-6770-3p	5	11	1.22	1.32	1.2	16:hsa;hsa-mir-6770-3,16329344,16329364,+	0.146506	0.133093
hsa-miR-10401-3p	2	11	1.38	1.32	1.2	21:hsa;hsa-mir-10401,8206598,8206618,+	0.16482	0.14973
hsa-miR-7976	5	11	11	1.32	1.2	3:hsa;hsa-mir-7976,127587111,127587129,-	1.31856	1.19784
hsa-miR-9-5p	4	11	3.67	1.32	1.2	1:hsa;hsa-mir-9-1,156420356,156420378,-	0.439519	0.39928
hsa-miR-9-5p	4	11	3.67	1.32	1.2	15:hsa;hsa-mir-9-3,89368032,89368054,+	0.439519	0.39928
hsa-miR-6770-3p	5	11	1.22	1.32	1.2	16:hsa;hsa-mir-6770-3,14930859,14930879,+	0.146506	0.133093
hsa-miR-10401-3p	2	11	1.38	1.32	1.2	21:hsa;hsa-mir-10401,8389645,8389665,+	0.16482	0.14973
hsa-miR-6770-3p	5	11	1.22	1.32	1.2	16:hsa;hsa-mir-6770-1,14930859,14930879,+	0.146506	0.133093
hsa-miR-548ab	3	11	10.5	1.32	1.2	3:hsa;hsa-mir-548ab,103524043,103524064,-	1.25862	1.14339
hsa-miR-129-5p	4	11	5.5	1.32	1.2	7:hsa;hsa-mir-129-1,128207876,128207896,+	0.659278	0.598919
hsa-miR-541-5p	7	11	11	1.32	1.2	14:hsa;hsa-mir-541,101064504,101064528,+	1.31856	1.19784
hsa-miR-98-3p	2	11	11	1.32	1.2	X:hsa;hsa-mir-98,53556302,53556323,-	1.31856	1.19784
hsa-miR-2116-3p	6	11	11	1.32	1.2	15:hsa;hsa-mir-2116,59171233,59171253,-	1.31856	1.19784
hsa-miR-432-3p	2	11	11	1.32	1.2	14:hsa;hsa-mir-432,100884544,100884564,+	1.31856	1.19784
hsa-miR-10401-3p	2	11	1.38	1.32	1.2	GL000220.1:hsa;hsa-mir-10401,106034,106054,+	0.16482	0.14973
hsa-miR-6770-3p	5	11	1.22	1.32	1.2	16:hsa;hsa-mir-6770-1,18379390,18379410,-	0.146506	0.133093
hsa-miR-133a-3p	3	11	5.5	1.32	1.2	18:hsa;hsa-mir-133a-1,21825750,21825771,-	0.659278	0.598919
hsa-miR-6866-5p	4	11	11	1.32	1.2	17:hsa;hsa-mir-6866,40161938,40161960,+	1.31856	1.19784
hsa-miR-3167	6	11	11	1.32	1.2	11:hsa;hsa-mir-3167,126988511,126988532,-	1.31856	1.19784
hsa-miR-6770-3p	5	11	1.22	1.32	1.2	16:hsa;hsa-mir-6770-3,18379390,18379410,-	0.146506	0.133093
hsa-miR-29b-2-5p	3	11	11	1.32	1.2	1:hsa;hsa-mir-29b-2,207802453,207802474,-	1.31856	1.19784
hsa-miR-10401-3p	2	11	1.38	1.32	1.2	KI270733.1:hsa;hsa-mir-10401,122883,122903,+	0.16482	0.14973
hsa-miR-378d	4	11	3.75	1.32	1.2	8:hsa;hsa-mir-378d-2,93916043,93916062,-	0.449508	0.408354
hsa-miR-6770-3p	5	11	1.22	1.32	1.2	16:hsa;hsa-mir-6770-1,16329344,16329364,+	0.146506	0.133093
hsa-miR-378d	3	10	2.75	1.2	1.09	4:hsa;hsa-mir-378d-1,5923305,5923324,-	0.329639	0.29946
hsa-miR-195-3p	5	10	10	1.2	1.09	17:hsa;hsa-mir-195,7017667,7017688,-	1.19869	1.08894
hsa-miR-203a-3p	6	10	10	1.2	1.09	14:hsa;hsa-mir-203a,104117469,104117490,+	1.19869	1.08894
hsa-miR-3613-3p	2	10	10	1.2	1.09	13:hsa;hsa-mir-3613,49996467,49996490,-	1.19869	1.08894
hsa-miR-2110	9	10	10	1.2	1.09	10:hsa;hsa-mir-2110,114174112,114174133,-	1.19869	1.08894
hsa-let-7c-3p	3	10	10	1.2	1.09	21:hsa;hsa-let-7c,16539883,16539904,+	1.19869	1.08894
hsa-miR-5010-3p	6	10	10	1.2	1.09	17:hsa;hsa-mir-5010,42514267,42514288,+	1.19869	1.08894
hsa-miR-23b-5p	4	10	10	1.2	1.09	9:hsa;hsa-mir-23b,95085227,95085248,+	1.19869	1.08894
hsa-miR-6837-3p	2	9	9	1.08	0.98	7:hsa;hsa-mir-6837,44051807,44051829,+	1.07882	0.98005
hsa-miR-500a-5p	4	9	5.5	1.08	0.98	X:hsa;hsa-mir-500a,50008443,50008465,+	0.659278	0.598919
hsa-miR-5695	6	9	9	1.08	0.98	19:hsa;hsa-mir-5695,12920373,12920394,+	1.07882	0.98005
hsa-miR-1228-3p	3	9	9	1.08	0.98	12:hsa;hsa-mir-1228,57194555,57194574,+	1.07882	0.98005
hsa-miR-190a-3p	2	9	9	1.08	0.98	15:hsa;hsa-mir-190a,62824008,62824028,+	1.07882	0.98005
hsa-miR-548l	2	9	9	1.08	0.98	11:hsa;hsa-mir-548l,94466509,94466530,-	1.07882	0.98005
hsa-miR-381-5p	4	9	9	1.08	0.98	14:hsa;hsa-mir-381,101045927,101045948,+	1.07882	0.98005
hsa-miR-3177-3p	4	9	9	1.08	0.98	16:hsa;hsa-mir-3177,1735038,1735058,+	1.07882	0.98005
hsa-miR-301a-5p	2	9	9	1.08	0.98	17:hsa;hsa-mir-301a,59151149,59151170,-	1.07882	0.98005
hsa-miR-1270	2	9	9	1.08	0.98	19:hsa;hsa-mir-1270,20399284,20399306,-	1.07882	0.98005
hsa-miR-1278	6	9	9	1.08	0.98	1:hsa;hsa-mir-1278,193136552,193136573,+	1.07882	0.98005
hsa-miR-1322	3	9	9	1.08	0.98	8:hsa;hsa-mir-1322,10825423,10825441,-	1.07882	0.98005
hsa-miR-23c	7	9	7	1.08	0.98	X:hsa;hsa-mir-23c,20017153,20017174,-	0.839082	0.762261
hsa-miR-4768-5p	5	8	8	0.96	0.87	X:hsa;hsa-mir-4768,17425889,17425910,+	0.95895	0.871156
hsa-miR-1306-3p	4	8	8	0.96	0.87	22:hsa;hsa-mir-1306,20086112,20086129,+	0.95895	0.871156
hsa-miR-5001-3p	6	8	8	0.96	0.87	2:hsa;hsa-mir-5001,232550533,232550554,-	0.95895	0.871156
hsa-miR-1304-5p	6	8	8	0.96	0.87	11:hsa;hsa-mir-1304,93733693,93733714,-	0.95895	0.871156
hsa-miR-147b-3p	4	8	8	0.96	0.87	15:hsa;hsa-mir-147b,45433098,45433118,+	0.95895	0.871156
hsa-miR-4473	5	8	8	0.96	0.87	9:hsa;hsa-mir-4473,20411204,20411225,-	0.95895	0.871156
hsa-miR-1228-5p	3	8	8	0.96	0.87	12:hsa;hsa-mir-1228,57194504,57194524,+	0.95895	0.871156
hsa-miR-4767	6	8	8	0.96	0.87	X:hsa;hsa-mir-4767,7147869,7147891,+	0.95895	0.871156
hsa-miR-548s	3	8	8	0.96	0.87	2:hsa;hsa-mir-548s,11767495,11767517,+	0.95895	0.871156
hsa-miR-597-3p	6	8	8	0.96	0.87	8:hsa;hsa-mir-597,9741729,9741751,+	0.95895	0.871156
hsa-miR-3651	5	8	8	0.96	0.87	9:hsa;hsa-mir-3651,92292521,92292544,-	0.95895	0.871156
hsa-miR-541-3p	3	8	8	0.96	0.87	14:hsa;hsa-mir-541,101064548,101064569,+	0.95895	0.871156
hsa-miR-4762-5p	6	8	8	0.96	0.87	22:hsa;hsa-mir-4762,45760532,45760552,+	0.95895	0.871156
hsa-miR-502-5p	6	8	8	0.96	0.87	X:hsa;hsa-mir-502,50014613,50014633,+	0.95895	0.871156
hsa-miR-376c-5p	4	8	4.5	0.96	0.87	14:hsa;hsa-mir-376c,101039694,101039714,+	0.53941	0.490025
hsa-miR-3064-5p	6	8	8	0.96	0.87	17:hsa;hsa-mir-3064,64500776,64500796,-	0.95895	0.871156
hsa-miR-582-5p	4	8	8	0.96	0.87	5:hsa;hsa-mir-582,59703621,59703643,-	0.95895	0.871156
hsa-miR-3939	1	7	7	0.84	0.76	6:hsa;hsa-mir-3939,166997868,166997889,-	0.839082	0.762261
hsa-miR-4424	1	7	7	0.84	0.76	1:hsa;hsa-mir-4424,178677763,178677784,+	0.839082	0.762261
hsa-miR-643	2	7	7	0.84	0.76	19:hsa;hsa-mir-643,52281857,52281878,+	0.839082	0.762261
hsa-miR-6505-5p	2	7	7	0.84	0.76	12:hsa;hsa-mir-6505,48132800,48132821,+	0.839082	0.762261
hsa-miR-624-5p	3	7	7	0.84	0.76	14:hsa;hsa-mir-624,31014661,31014682,-	0.839082	0.762261
hsa-miR-10527-5p	3	7	7	0.84	0.76	12:hsa;hsa-mir-10527,63823663,63823685,+	0.839082	0.762261
hsa-miR-500b-5p	3	7	3.5	0.84	0.76	X:hsa;hsa-mir-500b,50010682,50010699,+	0.419541	0.381131
hsa-miR-548j-5p	4	7	7	0.84	0.76	22:hsa;hsa-mir-548j,26555240,26555261,-	0.839082	0.762261
hsa-miR-375-3p	2	7	7	0.84	0.76	2:hsa;hsa-mir-375,219001684,219001705,-	0.839082	0.762261
hsa-miR-376b-5p	3	7	3.5	0.84	0.76	14:hsa;hsa-mir-376b,101040459,101040480,+	0.419541	0.381131
hsa-miR-320e	5	7	7	0.84	0.76	19:hsa;hsa-mir-320e,46709325,46709342,-	0.839082	0.762261
hsa-miR-362-3p	4	7	7	0.84	0.76	X:hsa;hsa-mir-362,50009005,50009026,+	0.839082	0.762261
hsa-miR-2116-5p	4	7	7	0.84	0.76	15:hsa;hsa-mir-2116,59171196,59171216,-	0.839082	0.762261
hsa-miR-499a-5p	3	7	7	0.84	0.76	20:hsa;hsa-mir-499a,34990408,34990428,+	0.839082	0.762261
hsa-miR-4717-3p	7	7	7	0.84	0.76	16:hsa;hsa-mir-4717,2274661,2274681,+	0.839082	0.762261
hsa-miR-6892-5p	5	7	7	0.84	0.76	7:hsa;hsa-mir-6892,143382686,143382706,+	0.839082	0.762261
hsa-miR-3180-3p	3	6	0.46	0.72	0.65	16:hsa;hsa-mir-3180-5,2136012,2136033,-	0.0553241	0.050259
hsa-miR-3180	3	6	0.46	0.72	0.65	16:hsa;hsa-mir-3180-5,2136012,2136030,-	0.0553241	0.050259
hsa-miR-3180-3p	3	6	0.46	0.72	0.65	16:hsa;hsa-mir-3180-2,14911281,14911302,+	0.0553241	0.050259
hsa-miR-3681-5p	3	6	6	0.72	0.65	2:hsa;hsa-mir-3681,12199138,12199159,+	0.719213	0.653367
hsa-miR-3180-3p	3	6	0.46	0.72	0.65	16:hsa;hsa-mir-3180-2,18402237,18402258,-	0.0553241	0.050259
hsa-miR-3180-3p	3	6	0.46	0.72	0.65	16:hsa;hsa-mir-3180-1,14911281,14911302,+	0.0553241	0.050259
hsa-miR-3180-3p	3	6	0.46	0.72	0.65	16:hsa;hsa-mir-3180-1,16309936,16309957,+	0.0553241	0.050259
hsa-miR-3688-3p	4	6	3.5	0.72	0.65	4:hsa;hsa-mir-3688-1,159128861,159128882,-	0.419541	0.381131
hsa-miR-3180-3p	3	6	0.46	0.72	0.65	16:hsa;hsa-mir-3180-2,16309936,16309957,+	0.0553241	0.050259
hsa-miR-3180-3p	3	6	0.46	0.72	0.65	16:hsa;hsa-mir-3180-4,15154885,15154906,-	0.0553241	0.050259
hsa-miR-3180	3	6	0.46	0.72	0.65	16:hsa;hsa-mir-3180-4,15154885,15154903,-	0.0553241	0.050259
hsa-miR-3159	4	6	6	0.72	0.65	11:hsa;hsa-mir-3159,18387796,18387817,+	0.719213	0.653367
hsa-miR-4647	4	6	6	0.72	0.65	6:hsa;hsa-mir-4647,44254216,44254238,-	0.719213	0.653367
hsa-miR-3136-5p	5	6	6	0.72	0.65	3:hsa;hsa-mir-3136,69048967,69048989,-	0.719213	0.653367
hsa-miR-296-5p	3	6	6	0.72	0.65	20:hsa;hsa-mir-296,58817628,58817648,-	0.719213	0.653367
hsa-miR-939-5p	6	6	6	0.72	0.65	8:hsa;hsa-mir-939,144394163,144394186,-	0.719213	0.653367
hsa-miR-9901	4	6	6	0.72	0.65	16:hsa;hsa-mir-9901,34163601,34163621,+	0.719213	0.653367
hsa-miR-4786-5p	6	6	6	0.72	0.65	2:hsa;hsa-mir-4786,239943025,239943046,-	0.719213	0.653367
hsa-miR-5683	2	6	6	0.72	0.65	6:hsa;hsa-mir-5683,6169343,6169366,+	0.719213	0.653367
hsa-miR-449c-5p	4	6	6	0.72	0.65	5:hsa;hsa-mir-449c,55172278,55172302,-	0.719213	0.653367
hsa-miR-5588-5p	3	6	6	0.72	0.65	3:hsa;hsa-mir-5588,185253210,185253230,-	0.719213	0.653367
hsa-miR-6515-5p	3	6	6	0.72	0.65	19:hsa;hsa-mir-6515,12940486,12940506,+	0.719213	0.653367
hsa-miR-3180-3p	3	6	0.46	0.72	0.65	16:hsa;hsa-mir-3180-3,16309936,16309957,+	0.0553241	0.050259
hsa-miR-144-5p	1	6	6	0.72	0.65	17:hsa;hsa-mir-144,28861547,28861568,-	0.719213	0.653367
hsa-miR-200a-3p	3	6	6	0.72	0.65	1:hsa;hsa-mir-200a,1167916,1167937,+	0.719213	0.653367
hsa-miR-6720-5p	6	6	6	0.72	0.65	6:hsa;hsa-mir-6720,1390344,1390366,-	0.719213	0.653367
hsa-miR-6720-3p	2	6	6	0.72	0.65	6:hsa;hsa-mir-6720,1390380,1390401,-	0.719213	0.653367
hsa-miR-3180-3p	3	6	0.46	0.72	0.65	16:hsa;hsa-mir-3180-3,14911281,14911302,+	0.0553241	0.050259
hsa-miR-3684	4	6	6	0.72	0.65	4:hsa;hsa-mir-3684,98997434,98997454,+	0.719213	0.653367
hsa-miR-6818-5p	2	6	6	0.72	0.65	22:hsa;hsa-mir-6818,30007054,30007075,+	0.719213	0.653367
hsa-miR-3180-3p	3	6	0.46	0.72	0.65	16:hsa;hsa-mir-3180-1,18402239,18402260,-	0.0553241	0.050259
hsa-miR-3180-3p	3	6	0.46	0.72	0.65	16:hsa;hsa-mir-3180-3,18402239,18402260,-	0.0553241	0.050259
hsa-miR-1262	5	6	6	0.72	0.65	1:hsa;hsa-mir-1262,68183531,68183552,-	0.719213	0.653367
hsa-miR-6859-5p	4	5	0.31	0.6	0.54	1:hsa;hsa-mir-6859-2,187896,187918,-	0.037459	0.0340295
hsa-miR-556-5p	2	5	5	0.6	0.54	1:hsa;hsa-mir-556,162342561,162342582,+	0.599344	0.544472
hsa-miR-6859-5p	4	5	0.31	0.6	0.54	16:hsa;hsa-mir-6859-4,17057,17079,-	0.037459	0.0340295
hsa-miR-153-5p	2	5	5	0.6	0.54	7:hsa;hsa-mir-153-2,157574350,157574371,-	0.599344	0.544472
hsa-miR-10b-3p	4	5	5	0.6	0.54	2:hsa;hsa-mir-10b,176150368,176150389,+	0.599344	0.544472
hsa-miR-3130-5p	2	5	2.5	0.6	0.54	2:hsa;hsa-mir-3130-2,206783246,206783266,+	0.299672	0.272236
hsa-miR-3152-5p	4	5	5	0.6	0.54	9:hsa;hsa-mir-3152,18573316,18573337,+	0.599344	0.544472
hsa-miR-4466	3	5	5	0.6	0.54	6:hsa;hsa-mir-4466,156779682,156779699,-	0.599344	0.544472
hsa-miR-487b-5p	5	5	5	0.6	0.54	14:hsa;hsa-mir-487b,101046469,101046490,+	0.599344	0.544472
hsa-miR-501-5p	2	5	5	0.6	0.54	X:hsa;hsa-mir-501,50009735,50009756,+	0.599344	0.544472
hsa-miR-6859-5p	4	5	0.31	0.6	0.54	1:hsa;hsa-mir-6859-2,17374,17396,-	0.037459	0.0340295
hsa-miR-6859-5p	4	5	0.31	0.6	0.54	1:hsa;hsa-mir-6859-1,187896,187918,-	0.037459	0.0340295
hsa-miR-103a-2-5p	2	5	5	0.6	0.54	20:hsa;hsa-mir-103a-2,3917504,3917526,+	0.599344	0.544472
hsa-miR-3157-3p	3	5	5	0.6	0.54	10:hsa;hsa-mir-3157,96064372,96064393,-	0.599344	0.544472
hsa-miR-561-3p	2	5	5	0.6	0.54	2:hsa;hsa-mir-561,188297552,188297573,+	0.599344	0.544472
hsa-miR-122b-5p	4	5	5	0.6	0.54	18:hsa;hsa-mir-122b,58451089,58451111,-	0.599344	0.544472
hsa-miR-6868-3p	3	5	5	0.6	0.54	17:hsa;hsa-mir-6868,76098056,76098076,-	0.599344	0.544472
hsa-miR-6859-5p	4	5	0.31	0.6	0.54	1:hsa;hsa-mir-6859-3,17374,17396,-	0.037459	0.0340295
hsa-miR-6859-5p	4	5	0.31	0.6	0.54	15:hsa;hsa-mir-6859-4,101973529,101973551,+	0.037459	0.0340295
hsa-miR-3130-5p	2	5	2.5	0.6	0.54	2:hsa;hsa-mir-3130-1,206783246,206783266,-	0.299672	0.272236
hsa-miR-6859-5p	4	5	0.31	0.6	0.54	16:hsa;hsa-mir-6859-1,17057,17079,-	0.037459	0.0340295
hsa-miR-3127-5p	3	5	5	0.6	0.54	2:hsa;hsa-mir-3127,96798288,96798310,+	0.599344	0.544472
hsa-miR-6859-5p	4	5	0.31	0.6	0.54	15:hsa;hsa-mir-6859-1,101973529,101973551,+	0.037459	0.0340295
hsa-miR-6859-5p	4	5	0.31	0.6	0.54	16:hsa;hsa-mir-6859-2,17057,17079,-	0.037459	0.0340295
hsa-miR-585-5p	1	5	5	0.6	0.54	5:hsa;hsa-mir-585,169263625,169263646,-	0.599344	0.544472
hsa-miR-6859-5p	4	5	0.31	0.6	0.54	1:hsa;hsa-mir-6859-1,17374,17396,-	0.037459	0.0340295
hsa-miR-1291	4	5	5	0.6	0.54	12:hsa;hsa-mir-1291,48654457,48654480,-	0.599344	0.544472
hsa-miR-6859-5p	4	5	0.31	0.6	0.54	1:hsa;hsa-mir-6859-4,187896,187918,-	0.037459	0.0340295
hsa-miR-219a-5p	4	5	4	0.6	0.54	6:hsa;hsa-mir-219a-1,33207855,33207875,+	0.479475	0.435578
hsa-miR-6772-3p	5	5	5	0.6	0.54	16:hsa;hsa-mir-6772,57772329,57772351,-	0.599344	0.544472
hsa-miR-6859-5p	4	5	0.31	0.6	0.54	1:hsa;hsa-mir-6859-4,17374,17396,-	0.037459	0.0340295
hsa-miR-7-2-3p	4	5	5	0.6	0.54	15:hsa;hsa-mir-7-2,88611896,88611917,+	0.599344	0.544472
hsa-miR-642a-5p	2	5	5	0.6	0.54	19:hsa;hsa-mir-642a,45674943,45674964,+	0.599344	0.544472
hsa-miR-6859-5p	4	5	0.31	0.6	0.54	15:hsa;hsa-mir-6859-3,101973529,101973551,+	0.037459	0.0340295
hsa-miR-6859-5p	4	5	0.31	0.6	0.54	16:hsa;hsa-mir-6859-3,17057,17079,-	0.037459	0.0340295
hsa-miR-1538	4	5	5	0.6	0.54	16:hsa;hsa-mir-1538,69565846,69565868,-	0.599344	0.544472
hsa-miR-6859-5p	4	5	0.31	0.6	0.54	1:hsa;hsa-mir-6859-3,187896,187918,-	0.037459	0.0340295
hsa-miR-363-3p	4	5	5	0.6	0.54	X:hsa;hsa-mir-363,134169427,134169448,-	0.599344	0.544472
hsa-miR-3688-3p	3	5	2.5	0.6	0.54	4:hsa;hsa-mir-3688-2,159128861,159128882,+	0.299672	0.272236
hsa-miR-3943	2	5	5	0.6	0.54	7:hsa;hsa-mir-3943,43150917,43150939,+	0.599344	0.544472
hsa-miR-4474-3p	5	5	5	0.6	0.54	9:hsa;hsa-mir-4474,20502309,20502330,-	0.599344	0.544472
hsa-miR-6859-5p	4	5	0.31	0.6	0.54	15:hsa;hsa-mir-6859-2,101973529,101973551,+	0.037459	0.0340295
hsa-miR-6838-5p	2	5	5	0.6	0.54	7:hsa;hsa-mir-6838,44073383,44073404,-	0.599344	0.544472
hsa-miR-503-3p	3	5	5	0.6	0.54	X:hsa;hsa-mir-503,134546373,134546395,-	0.599344	0.544472
hsa-miR-4286	1	5	5	0.6	0.54	8:hsa;hsa-mir-4286,10666988,10667004,+	0.599344	0.544472
hsa-miR-579-5p	5	5	5	0.6	0.54	5:hsa;hsa-mir-579,32394402,32394423,-	0.599344	0.544472
hsa-miR-3918	3	4	4	0.48	0.44	6:hsa;hsa-mir-3918,158764679,158764699,-	0.479475	0.435578
hsa-miR-570-3p	1	4	4	0.48	0.44	3:hsa;hsa-mir-570,195699460,195699481,+	0.479475	0.435578
hsa-miR-3611	3	4	4	0.48	0.44	10:hsa;hsa-mir-3611,35079649,35079669,-	0.479475	0.435578
hsa-miR-3609	2	4	4	0.48	0.44	7:hsa;hsa-mir-3609,98881700,98881723,+	0.479475	0.435578
hsa-miR-3128	4	4	4	0.48	0.44	2:hsa;hsa-mir-3128,177255949,177255971,-	0.479475	0.435578
hsa-miR-6516-3p	3	4	4	0.48	0.44	17:hsa;hsa-mir-6516,77089469,77089490,+	0.479475	0.435578
hsa-miR-652-5p	3	4	4	0.48	0.44	X:hsa;hsa-mir-652,110055349,110055373,+	0.479475	0.435578
hsa-miR-4677-5p	2	4	4	0.48	0.44	1:hsa;hsa-mir-4677,243346188,243346209,+	0.479475	0.435578
hsa-miR-378g	3	4	4	0.48	0.44	1:hsa;hsa-mir-378g,94745861,94745880,-	0.479475	0.435578
hsa-miR-449a	2	4	4	0.48	0.44	5:hsa;hsa-mir-449a,55170547,55170568,-	0.479475	0.435578
hsa-miR-4766-3p	3	4	4	0.48	0.44	22:hsa;hsa-mir-4766,40813928,40813948,-	0.479475	0.435578
hsa-miR-490-5p	3	4	4	0.48	0.44	7:hsa;hsa-mir-490,136903205,136903224,+	0.479475	0.435578
hsa-miR-548j-3p	3	4	4	0.48	0.44	22:hsa;hsa-mir-548j,26555276,26555296,-	0.479475	0.435578
hsa-miR-323a-5p	4	4	4	0.48	0.44	14:hsa;hsa-mir-323a,101025747,101025768,+	0.479475	0.435578
hsa-miR-3065-5p	4	4	4	0.48	0.44	17:hsa;hsa-mir-3065,81125886,81125908,+	0.479475	0.435578
hsa-miR-4761-3p	3	4	4	0.48	0.44	22:hsa;hsa-mir-4761,19963814,19963834,+	0.479475	0.435578
hsa-miR-545-3p	3	4	4	0.48	0.44	X:hsa;hsa-mir-545,74287166,74287187,-	0.479475	0.435578
hsa-miR-2277-3p	4	4	4	0.48	0.44	5:hsa;hsa-mir-2277,93620754,93620774,-	0.479475	0.435578
hsa-miR-4661-5p	4	4	4	0.48	0.44	8:hsa;hsa-mir-4661,91205494,91205515,+	0.479475	0.435578
hsa-miR-380-5p	2	4	4	0.48	0.44	14:hsa;hsa-mir-380,101025021,101025042,+	0.479475	0.435578
hsa-miR-1343-3p	3	4	4	0.48	0.44	11:hsa;hsa-mir-1343,34941888,34941909,+	0.479475	0.435578
hsa-miR-1179	2	4	4	0.48	0.44	15:hsa;hsa-mir-1179,88608121,88608141,+	0.479475	0.435578
hsa-miR-1245a	3	4	4	0.48	0.44	2:hsa;hsa-mir-1245a,188978136,188978156,+	0.479475	0.435578
hsa-miR-1908-5p	3	4	4	0.48	0.44	11:hsa;hsa-mir-1908,61815172,61815192,-	0.479475	0.435578
hsa-miR-1245b-5p	3	4	4	0.48	0.44	2:hsa;hsa-mir-1245b,188978101,188978121,-	0.479475	0.435578
hsa-miR-10395-3p	2	4	4	0.48	0.44	19:hsa;hsa-mir-10395,12703644,12703664,-	0.479475	0.435578
hsa-miR-1267	3	4	4	0.48	0.44	13:hsa;hsa-mir-1267,107531182,107531202,-	0.479475	0.435578
hsa-miR-2114-5p	1	4	4	0.48	0.44	X:hsa;hsa-mir-2114,150228016,150228037,+	0.479475	0.435578
hsa-miR-2114-3p	3	4	4	0.48	0.44	X:hsa;hsa-mir-2114,150228052,150228072,+	0.479475	0.435578
hsa-miR-505-5p	1	4	4	0.48	0.44	X:hsa;hsa-mir-505,139924162,139924183,-	0.479475	0.435578
hsa-miR-491-5p	4	4	4	0.48	0.44	9:hsa;hsa-mir-491,20716120,20716141,+	0.479475	0.435578
hsa-miR-943	4	4	4	0.48	0.44	4:hsa;hsa-mir-943,1986438,1986458,-	0.479475	0.435578
hsa-miR-137-5p	2	4	4	0.48	0.44	1:hsa;hsa-mir-137,98046092,98046114,-	0.479475	0.435578
hsa-miR-410-5p	1	4	4	0.48	0.44	14:hsa;hsa-mir-410,101065925,101065945,+	0.479475	0.435578
hsa-miR-4757-3p	4	4	4	0.48	0.44	2:hsa;hsa-mir-4757,19348476,19348497,+	0.479475	0.435578
hsa-miR-551b-3p	1	3	3	0.36	0.33	3:hsa;hsa-mir-551b,168551914,168551934,+	0.359606	0.326683
hsa-miR-3145-3p	2	3	3	0.36	0.33	6:hsa;hsa-mir-3145,138435261,138435284,-	0.359606	0.326683
hsa-miR-1284	2	3	3	0.36	0.33	3:hsa;hsa-mir-1284,71541999,71542020,-	0.359606	0.326683
hsa-miR-5091	2	3	3	0.36	0.33	4:hsa;hsa-mir-5091,13627875,13627897,+	0.359606	0.326683
hsa-miR-6836-5p	2	3	3	0.36	0.33	7:hsa;hsa-mir-6836,2257520,2257541,-	0.359606	0.326683
hsa-miR-6511b-5p	3	3	0.15	0.36	0.33	16:hsa;hsa-mir-6511b-1,15134076,15134099,-	0.0179803	0.0163342
hsa-miR-3138	3	3	3	0.36	0.33	4:hsa;hsa-mir-3138,10078658,10078681,-	0.359606	0.326683
hsa-miR-4788	2	3	3	0.36	0.33	3:hsa;hsa-mir-4788,134437836,134437857,+	0.359606	0.326683
hsa-miR-4714-3p	3	3	3	0.36	0.33	15:hsa;hsa-mir-4714,98784473,98784494,+	0.359606	0.326683
hsa-miR-3116	1	3	1.5	0.36	0.33	1:hsa;hsa-mir-3116-1,62078830,62078851,+	0.179803	0.163342
hsa-miR-7156-5p	2	3	3	0.36	0.33	1:hsa;hsa-mir-7156,77060143,77060165,+	0.359606	0.326683
hsa-miR-6511b-5p	3	3	0.15	0.36	0.33	16:hsa;hsa-mir-6511b-1,2106679,2106702,-	0.0179803	0.0163342
hsa-miR-6511a-5p	3	3	0.15	0.36	0.33	16:hsa;hsa-mir-6511a-2,14925941,14925963,+	0.0179803	0.0163342
hsa-miR-6511a-3p	3	3	0.19	0.36	0.33	16:hsa;hsa-mir-6511a-2,14925980,14926001,+	0.0224754	0.0204177
hsa-miR-4510	2	3	1.5	0.36	0.33	15:hsa;hsa-mir-4510,35926863,35926884,+	0.179803	0.163342
hsa-miR-624-3p	2	3	3	0.36	0.33	14:hsa;hsa-mir-624,31014699,31014719,-	0.359606	0.326683
hsa-miR-573	3	3	3	0.36	0.33	4:hsa;hsa-mir-573,24520207,24520230,-	0.359606	0.326683
hsa-miR-1249-3p	3	3	3	0.36	0.33	22:hsa;hsa-mir-1249,45200994,45201015,-	0.359606	0.326683
hsa-miR-6511a-5p	3	3	0.15	0.36	0.33	16:hsa;hsa-mir-6511a-1,14925941,14925963,+	0.0179803	0.0163342
hsa-miR-6511a-3p	3	3	0.19	0.36	0.33	16:hsa;hsa-mir-6511a-1,14925980,14926001,+	0.0224754	0.0204177
hsa-miR-6511a-5p	3	3	0.15	0.36	0.33	16:hsa;hsa-mir-6511a-3,16368880,16368902,+	0.0179803	0.0163342
hsa-miR-6511a-3p	3	3	0.19	0.36	0.33	16:hsa;hsa-mir-6511a-3,16368919,16368940,+	0.0224754	0.0204177
hsa-miR-6764-3p	2	3	3	0.36	0.33	14:hsa;hsa-mir-6764,100277397,100277417,+	0.359606	0.326683
hsa-miR-495-5p	2	3	3	0.36	0.33	14:hsa;hsa-mir-495,101033768,101033789,+	0.359606	0.326683
hsa-miR-6511a-5p	3	3	0.15	0.36	0.33	16:hsa;hsa-mir-6511a-3,16324592,16324614,+	0.0179803	0.0163342
hsa-miR-6511a-3p	3	3	0.19	0.36	0.33	16:hsa;hsa-mir-6511a-3,16324631,16324652,+	0.0224754	0.0204177
hsa-miR-205-5p	2	3	3	0.36	0.33	1:hsa;hsa-mir-205,209432166,209432187,+	0.359606	0.326683
hsa-miR-1277-3p	3	3	3	0.36	0.33	X:hsa;hsa-mir-1277,118386440,118386461,+	0.359606	0.326683
hsa-miR-6511a-5p	3	3	0.15	0.36	0.33	16:hsa;hsa-mir-6511a-1,16324592,16324614,+	0.0179803	0.0163342
hsa-miR-6511a-3p	3	3	0.19	0.36	0.33	16:hsa;hsa-mir-6511a-1,16324631,16324652,+	0.0224754	0.0204177
hsa-miR-6511a-5p	3	3	0.15	0.36	0.33	16:hsa;hsa-mir-6511a-1,18344017,18344039,-	0.0179803	0.0163342
hsa-miR-6511a-3p	3	3	0.19	0.36	0.33	16:hsa;hsa-mir-6511a-1,18344056,18344077,-	0.0224754	0.0204177
hsa-miR-5587-3p	2	3	3	0.36	0.33	16:hsa;hsa-mir-5587,535348,535368,+	0.359606	0.326683
hsa-miR-4742-3p	3	3	3	0.36	0.33	1:hsa;hsa-mir-4742,224398289,224398311,-	0.359606	0.326683
hsa-miR-6511a-5p	3	3	0.15	0.36	0.33	16:hsa;hsa-mir-6511a-4,16368880,16368902,+	0.0179803	0.0163342
hsa-miR-6511a-3p	3	3	0.19	0.36	0.33	16:hsa;hsa-mir-6511a-4,16368919,16368940,+	0.0224754	0.0204177
hsa-miR-548ay-3p	3	3	3	0.36	0.33	3:hsa;hsa-mir-548ay,32506346,32506367,-	0.359606	0.326683
hsa-miR-338-3p	3	3	3	0.36	0.33	17:hsa;hsa-mir-338,81125924,81125945,-	0.359606	0.326683
hsa-miR-3173-5p	1	3	3	0.36	0.33	14:hsa;hsa-mir-3173,95137923,95137944,-	0.359606	0.326683
hsa-miR-656-5p	2	3	3	0.36	0.33	14:hsa;hsa-mir-656,101066731,101066751,+	0.359606	0.326683
hsa-miR-1245b-3p	2	3	3	0.36	0.33	2:hsa;hsa-mir-1245b,188978134,188978155,-	0.359606	0.326683
hsa-miR-6513-5p	3	3	3	0.36	0.33	2:hsa;hsa-mir-6513,218280127,218280149,-	0.359606	0.326683
hsa-miR-6513-3p	3	3	3	0.36	0.33	2:hsa;hsa-mir-6513,218280166,218280186,-	0.359606	0.326683
hsa-miR-6511a-5p	3	3	0.15	0.36	0.33	16:hsa;hsa-mir-6511a-3,14925941,14925963,+	0.0179803	0.0163342
hsa-miR-6511a-3p	3	3	0.19	0.36	0.33	16:hsa;hsa-mir-6511a-3,14925980,14926001,+	0.0224754	0.0204177
hsa-miR-6511a-5p	3	3	0.15	0.36	0.33	16:hsa;hsa-mir-6511a-4,18344017,18344039,-	0.0179803	0.0163342
hsa-miR-6511a-3p	3	3	0.19	0.36	0.33	16:hsa;hsa-mir-6511a-4,18344056,18344077,-	0.0224754	0.0204177
hsa-miR-3935	3	3	3	0.36	0.33	16:hsa;hsa-mir-3935,56245577,56245598,+	0.359606	0.326683
hsa-miR-1247-5p	1	3	3	0.36	0.33	14:hsa;hsa-mir-1247,101560326,101560347,-	0.359606	0.326683
hsa-miR-5010-5p	1	3	3	0.36	0.33	17:hsa;hsa-mir-5010,42514208,42514229,+	0.359606	0.326683
hsa-miR-2682-3p	2	3	3	0.36	0.33	1:hsa;hsa-mir-2682,98045301,98045322,-	0.359606	0.326683
hsa-miR-6511b-5p	3	3	0.15	0.36	0.33	16:hsa;hsa-mir-6511b-2,2106683,2106706,-	0.0179803	0.0163342
hsa-miR-4797-3p	3	3	3	0.36	0.33	3:hsa;hsa-mir-4797,197293918,197293938,-	0.359606	0.326683
hsa-miR-412-3p	3	3	3	0.36	0.33	14:hsa;hsa-mir-412,101065500,101065522,+	0.359606	0.326683
hsa-miR-6511b-5p	3	3	0.15	0.36	0.33	16:hsa;hsa-mir-6511b-2,15134080,15134103,-	0.0179803	0.0163342
hsa-miR-3116	1	3	1.5	0.36	0.33	1:hsa;hsa-mir-3116-2,62078830,62078851,-	0.179803	0.163342
hsa-miR-6511a-5p	3	3	0.15	0.36	0.33	16:hsa;hsa-mir-6511a-4,14925941,14925963,+	0.0179803	0.0163342
hsa-miR-6511a-3p	3	3	0.19	0.36	0.33	16:hsa;hsa-mir-6511a-4,14925980,14926001,+	0.0224754	0.0204177
hsa-miR-4638-3p	2	3	3	0.36	0.33	5:hsa;hsa-mir-4638,181222600,181222622,-	0.359606	0.326683
hsa-miR-6511a-5p	3	3	0.15	0.36	0.33	16:hsa;hsa-mir-6511a-2,16368880,16368902,+	0.0179803	0.0163342
hsa-miR-6511a-3p	3	3	0.19	0.36	0.33	16:hsa;hsa-mir-6511a-2,16368919,16368940,+	0.0224754	0.0204177
hsa-miR-6511a-5p	3	3	0.15	0.36	0.33	16:hsa;hsa-mir-6511a-2,16324592,16324614,+	0.0179803	0.0163342
hsa-miR-6511a-3p	3	3	0.19	0.36	0.33	16:hsa;hsa-mir-6511a-2,16324631,16324652,+	0.0224754	0.0204177
hsa-miR-3677-5p	2	3	3	0.36	0.33	16:hsa;hsa-mir-3677,2270715,2270736,+	0.359606	0.326683
hsa-miR-16-1-3p	2	3	3	0.36	0.33	13:hsa;hsa-mir-16-1,50049028,50049049,-	0.359606	0.326683
hsa-miR-4660	3	3	3	0.36	0.33	8:hsa;hsa-mir-4660,9048453,9048475,+	0.359606	0.326683
hsa-miR-6511a-5p	3	3	0.15	0.36	0.33	16:hsa;hsa-mir-6511a-2,18344017,18344039,-	0.0179803	0.0163342
hsa-miR-6511a-3p	3	3	0.19	0.36	0.33	16:hsa;hsa-mir-6511a-2,18344056,18344077,-	0.0224754	0.0204177
hsa-miR-6511a-5p	3	3	0.15	0.36	0.33	16:hsa;hsa-mir-6511a-1,16368880,16368902,+	0.0179803	0.0163342
hsa-miR-6511a-3p	3	3	0.19	0.36	0.33	16:hsa;hsa-mir-6511a-1,16368919,16368940,+	0.0224754	0.0204177
hsa-miR-4671-3p	3	3	3	0.36	0.33	1:hsa;hsa-mir-4671,234306512,234306532,+	0.359606	0.326683
hsa-miR-3154	1	3	3	0.36	0.33	9:hsa;hsa-mir-3154,128245000,128245021,-	0.359606	0.326683
hsa-miR-1910-5p	2	3	3	0.36	0.33	16:hsa;hsa-mir-1910,85741632,85741652,-	0.359606	0.326683
hsa-miR-188-3p	2	3	3	0.36	0.33	X:hsa;hsa-mir-188,50003556,50003576,+	0.359606	0.326683
hsa-miR-584-3p	2	3	3	0.36	0.33	5:hsa;hsa-mir-584,149062367,149062388,-	0.359606	0.326683
hsa-miR-6875-5p	2	3	3	0.36	0.33	7:hsa;hsa-mir-6875,100868041,100868061,+	0.359606	0.326683
hsa-miR-6511a-5p	3	3	0.15	0.36	0.33	16:hsa;hsa-mir-6511a-3,18344017,18344039,-	0.0179803	0.0163342
hsa-miR-6511a-3p	3	3	0.19	0.36	0.33	16:hsa;hsa-mir-6511a-3,18344056,18344077,-	0.0224754	0.0204177
hsa-miR-142-3p	3	3	3	0.36	0.33	17:hsa;hsa-mir-142,58331283,58331305,-	0.359606	0.326683
hsa-miR-3916	2	3	3	0.36	0.33	1:hsa;hsa-mir-3916,247201986,247202011,-	0.359606	0.326683
hsa-miR-660-3p	3	3	3	0.36	0.33	X:hsa;hsa-mir-660,50013292,50013312,+	0.359606	0.326683
hsa-miR-6842-3p	1	3	3	0.36	0.33	8:hsa;hsa-mir-6842,27433413,27433434,+	0.359606	0.326683
hsa-miR-451a	2	3	3	0.36	0.33	17:hsa;hsa-mir-451a,28861385,28861406,-	0.359606	0.326683
hsa-miR-7703	1	3	3	0.36	0.33	14:hsa;hsa-mir-7703,24143543,24143565,-	0.359606	0.326683
hsa-miR-9986	2	3	3	0.36	0.33	2:hsa;hsa-mir-9986,132433731,132433750,+	0.359606	0.326683
hsa-miR-1252-5p	3	3	3	0.36	0.33	12:hsa;hsa-mir-1252,79419261,79419282,+	0.359606	0.326683
hsa-miR-6511a-5p	3	3	0.15	0.36	0.33	16:hsa;hsa-mir-6511a-4,16324592,16324614,+	0.0179803	0.0163342
hsa-miR-6511a-3p	3	3	0.19	0.36	0.33	16:hsa;hsa-mir-6511a-4,16324631,16324652,+	0.0224754	0.0204177
hsa-miR-1226-5p	2	2	2	0.24	0.22	3:hsa;hsa-mir-1226,47849555,47849580,+	0.239738	0.217789
hsa-miR-488-5p	1	2	2	0.24	0.22	1:hsa;hsa-mir-488,177029376,177029396,-	0.239738	0.217789
hsa-miR-7-5p	2	2	1.33	0.24	0.22	9:hsa;hsa-mir-7-1,83969771,83969794,-	0.159825	0.145193
hsa-miR-1306-5p	2	2	2	0.24	0.22	22:hsa;hsa-mir-1306,20086072,20086093,+	0.239738	0.217789
hsa-miR-6855-3p	2	2	2	0.24	0.22	9:hsa;hsa-mir-6855,129869650,129869671,+	0.239738	0.217789
hsa-miR-6511b-3p	2	2	0.75	0.24	0.22	16:hsa;hsa-mir-6511b-1,15134118,15134140,-	0.0899016	0.0816708
hsa-miR-135b-5p	2	2	2	0.24	0.22	1:hsa;hsa-mir-135b,205448317,205448339,-	0.239738	0.217789
hsa-miR-5680	2	2	2	0.24	0.22	8:hsa;hsa-mir-5680,102125483,102125504,+	0.239738	0.217789
hsa-miR-605-5p	2	2	2	0.24	0.22	10:hsa;hsa-mir-605,51299588,51299610,+	0.239738	0.217789
hsa-miR-5692c	1	2	1	0.24	0.22	7:hsa;hsa-mir-5692c-2,97964457,97964478,-	0.119869	0.108894
hsa-miR-6847-5p	2	2	2	0.24	0.22	8:hsa;hsa-mir-6847,144079879,144079901,+	0.239738	0.217789
hsa-miR-548ar-3p	2	2	2	0.24	0.22	13:hsa;hsa-mir-548ar,114244541,114244561,+	0.239738	0.217789
hsa-miR-5706	1	2	2	0.24	0.22	5:hsa;hsa-mir-5706,119154646,119154667,+	0.239738	0.217789
hsa-miR-1293	2	2	2	0.24	0.22	12:hsa;hsa-mir-1293,50234151,50234172,-	0.239738	0.217789
hsa-miR-3614-5p	1	2	2	0.24	0.22	17:hsa;hsa-mir-3614,56891284,56891306,-	0.239738	0.217789
hsa-miR-6511b-3p	2	2	0.75	0.24	0.22	16:hsa;hsa-mir-6511b-1,2106721,2106743,-	0.0899016	0.0816708
hsa-miR-3121-3p	1	2	2	0.24	0.22	1:hsa;hsa-mir-3121,180438360,180438381,-	0.239738	0.217789
hsa-miR-3139	2	2	2	0.24	0.22	4:hsa;hsa-mir-3139,143343469,143343491,+	0.239738	0.217789
hsa-miR-548at-5p	2	2	2	0.24	0.22	17:hsa;hsa-mir-548at,42494773,42494794,+	0.239738	0.217789
hsa-miR-3940-5p	2	2	2	0.24	0.22	19:hsa;hsa-mir-3940,6416432,6416451,-	0.239738	0.217789
hsa-miR-3940-3p	1	2	2	0.24	0.22	19:hsa;hsa-mir-3940,6416466,6416487,-	0.239738	0.217789
hsa-miR-610	1	2	2	0.24	0.22	11:hsa;hsa-mir-610,28056830,28056850,+	0.239738	0.217789
hsa-miR-6852-3p	2	2	2	0.24	0.22	9:hsa;hsa-mir-6852,35710717,35710733,-	0.239738	0.217789
hsa-miR-3194-5p	1	2	2	0.24	0.22	20:hsa;hsa-mir-3194,51452914,51452934,-	0.239738	0.217789
hsa-miR-219b-3p	1	2	2	0.24	0.22	9:hsa;hsa-mir-219b,128392676,128392698,+	0.239738	0.217789
hsa-miR-4782-5p	2	2	2	0.24	0.22	2:hsa;hsa-mir-4782,113721299,113721320,-	0.239738	0.217789
hsa-miR-3944-3p	1	2	2	0.24	0.22	10:hsa;hsa-mir-3944,133371618,133371640,-	0.239738	0.217789
hsa-miR-3074-3p	2	2	2	0.24	0.22	9:hsa;hsa-mir-3074,95086063,95086084,-	0.239738	0.217789
hsa-miR-548a-5p	2	2	2	0.24	0.22	8:hsa;hsa-mir-548a-3,104484393,104484414,-	0.239738	0.217789
hsa-miR-3160-3p	2	2	1	0.24	0.22	11:hsa;hsa-mir-3160-2,46451858,46451879,+	0.119869	0.108894
hsa-miR-1277-5p	2	2	2	0.24	0.22	X:hsa;hsa-mir-1277,118386401,118386424,+	0.239738	0.217789
hsa-miR-19a-5p	2	2	2	0.24	0.22	13:hsa;hsa-mir-19a,91350904,91350925,+	0.239738	0.217789
hsa-miR-6845-5p	2	2	2	0.24	0.22	8:hsa;hsa-mir-6845,143837761,143837779,-	0.239738	0.217789
hsa-miR-4709-5p	2	2	2	0.24	0.22	14:hsa;hsa-mir-4709,74480141,74480162,-	0.239738	0.217789
hsa-miR-5006-3p	2	2	2	0.24	0.22	13:hsa;hsa-mir-5006,41568355,41568375,-	0.239738	0.217789
hsa-miR-4423-5p	2	2	2	0.24	0.22	1:hsa;hsa-mir-4423,85133806,85133827,+	0.239738	0.217789
hsa-miR-4642	1	2	2	0.24	0.22	6:hsa;hsa-mir-4642,44435650,44435671,+	0.239738	0.217789
hsa-miR-3170	2	2	2	0.24	0.22	13:hsa;hsa-mir-3170,98208533,98208554,+	0.239738	0.217789
hsa-miR-3910	2	2	1	0.24	0.22	9:hsa;hsa-mir-3910-1,91636313,91636332,+	0.119869	0.108894
hsa-miR-1247-3p	1	2	2	0.24	0.22	14:hsa;hsa-mir-1247,101560360,101560383,-	0.239738	0.217789
hsa-miR-6882-5p	2	2	2	0.24	0.22	15:hsa;hsa-mir-6882,74840647,74840668,-	0.239738	0.217789
hsa-miR-7851-3p	2	2	2	0.24	0.22	12:hsa;hsa-mir-7851,42323798,42323819,-	0.239738	0.217789
hsa-miR-6824-5p	2	2	2	0.24	0.22	3:hsa;hsa-mir-6824,48633641,48633662,-	0.239738	0.217789
hsa-miR-3177-5p	1	2	2	0.24	0.22	16:hsa;hsa-mir-3177,1734995,1735017,+	0.239738	0.217789
hsa-miR-1256	1	2	2	0.24	0.22	1:hsa;hsa-mir-1256,20988348,20988369,-	0.239738	0.217789
hsa-miR-1909-3p	2	2	2	0.24	0.22	19:hsa;hsa-mir-1909,1816207,1816228,-	0.239738	0.217789
hsa-miR-3942-5p	2	2	2	0.24	0.22	15:hsa;hsa-mir-3942,35372278,35372299,-	0.239738	0.217789
hsa-miR-664b-3p	1	2	2	0.24	0.22	X:hsa;hsa-mir-664b,154768635,154768656,+	0.239738	0.217789
hsa-miR-5191	2	2	2	0.24	0.22	1:hsa;hsa-mir-5191,201719579,201719600,+	0.239738	0.217789
hsa-miR-4687-5p	2	2	2	0.24	0.22	11:hsa;hsa-mir-4687,3856073,3856094,+	0.239738	0.217789
hsa-miR-642a-3p	2	2	2	0.24	0.22	19:hsa;hsa-mir-642a,45674978,45674999,+	0.239738	0.217789
hsa-miR-6500-5p	2	2	2	0.24	0.22	1:hsa;hsa-mir-6500,51060031,51060054,+	0.239738	0.217789
hsa-miR-1269b	2	2	2	0.24	0.22	17:hsa;hsa-mir-1269b,12917276,12917297,-	0.239738	0.217789
hsa-miR-378a-5p	2	2	2	0.24	0.22	5:hsa;hsa-mir-378a,149732829,149732850,+	0.239738	0.217789
hsa-miR-3910	2	2	1	0.24	0.22	9:hsa;hsa-mir-3910-2,91636313,91636332,-	0.119869	0.108894
hsa-miR-491-3p	2	2	2	0.24	0.22	9:hsa;hsa-mir-491,20716154,20716175,+	0.239738	0.217789
hsa-miR-4449	2	2	2	0.24	0.22	4:hsa;hsa-mir-4449,52712720,52712741,+	0.239738	0.217789
hsa-miR-3160-3p	2	2	1	0.24	0.22	11:hsa;hsa-mir-3160-1,46451858,46451879,-	0.119869	0.108894
hsa-miR-365a-5p	2	2	2	0.24	0.22	16:hsa;hsa-mir-365a,14309300,14309322,+	0.239738	0.217789
hsa-miR-218-2-3p	2	2	2	0.24	0.22	5:hsa;hsa-mir-218-2,168768212,168768233,-	0.239738	0.217789
hsa-miR-590-5p	1	2	2	0.24	0.22	7:hsa;hsa-mir-590,74191213,74191234,+	0.239738	0.217789
hsa-miR-1286	1	2	2	0.24	0.22	22:hsa;hsa-mir-1286,20249180,20249200,-	0.239738	0.217789
hsa-miR-6813-5p	2	2	2	0.24	0.22	20:hsa;hsa-mir-6813,64076960,64076982,-	0.239738	0.217789
hsa-miR-3165	2	2	2	0.24	0.22	11:hsa;hsa-mir-3165,72072237,72072258,-	0.239738	0.217789
hsa-miR-544a	2	2	2	0.24	0.22	14:hsa;hsa-mir-544a,101048712,101048733,+	0.239738	0.217789
hsa-miR-5692c	1	2	1	0.24	0.22	5:hsa;hsa-mir-5692c-1,135803043,135803064,-	0.119869	0.108894
hsa-miR-6786-3p	1	2	2	0.24	0.22	17:hsa;hsa-mir-6786,81693844,81693866,+	0.239738	0.217789
hsa-miR-6886-5p	1	2	2	0.24	0.22	19:hsa;hsa-mir-6886,11113479,11113499,+	0.239738	0.217789
hsa-miR-106a-5p	2	2	1.5	0.24	0.22	X:hsa;hsa-mir-106a,134170210,134170232,-	0.179803	0.163342
hsa-miR-4723-5p	2	2	2	0.24	0.22	17:hsa;hsa-mir-4723,28360660,28360683,+	0.239738	0.217789
hsa-miR-219a-5p	1	2	1	0.24	0.22	9:hsa;hsa-mir-219a-2,128392636,128392656,-	0.119869	0.108894
hsa-miR-3140-3p	1	1	1	0.12	0.11	4:hsa;hsa-mir-3140,152489386,152489407,-	0.119869	0.108894
hsa-miR-6724-5p	1	1	0.04	0.12	0.11	GL000220.1:hsa;hsa-mir-6724-4,104742,104764,+	0.00428103	0.00388909
hsa-miR-548ah-5p	1	1	1	0.12	0.11	4:hsa;hsa-mir-548ah,76575561,76575580,+	0.119869	0.108894
hsa-miR-6770-5p	1	1	0.11	0.12	0.11	16:hsa;hsa-mir-6770-2,14930825,14930848,+	0.0133188	0.0120994
hsa-miR-548i	1	1	0.25	0.12	0.11	3:hsa;hsa-mir-548i-1,125790442,125790463,-	0.0299672	0.0272236
hsa-miR-1233-3p	1	1	0.25	0.12	0.11	15:hsa;hsa-mir-1233-1,34528352,34528371,-	0.0299672	0.0272236
hsa-miR-449b-5p	1	1	1	0.12	0.11	5:hsa;hsa-mir-449b,55170661,55170682,-	0.119869	0.108894
hsa-miR-4479	1	1	1	0.12	0.11	9:hsa;hsa-mir-4479,136886777,136886798,+	0.119869	0.108894
hsa-miR-3678-5p	1	1	1	0.12	0.11	17:hsa;hsa-mir-3678,75406077,75406096,+	0.119869	0.108894
hsa-miR-20b-5p	1	1	0.33	0.12	0.11	X:hsa;hsa-mir-20b,134169814,134169836,-	0.0399563	0.0362981
hsa-miR-3179	1	1	0.06	0.12	0.11	16:hsa;hsa-mir-3179-2,18494544,18494565,-	0.0074918	0.0068059
hsa-miR-1233-3p	1	1	0.25	0.12	0.11	15:hsa;hsa-mir-1233-1,34382131,34382150,-	0.0299672	0.0272236
hsa-miR-3145-5p	1	1	1	0.12	0.11	6:hsa;hsa-mir-3145,138435224,138435245,-	0.119869	0.108894
hsa-miR-5701	1	1	0.08	0.12	0.11	KI270727.1:hsa;hsa-mir-5701-1,241102,241120,+	0.00998907	0.00907454
hsa-miR-6761-5p	1	1	1	0.12	0.11	12:hsa;hsa-mir-6761,111799839,111799859,+	0.119869	0.108894
hsa-miR-139-5p	1	1	1	0.12	0.11	11:hsa;hsa-mir-139,72615069,72615091,-	0.119869	0.108894
hsa-miR-548d-3p	1	1	0.5	0.12	0.11	17:hsa;hsa-mir-548d-2,67471549,67471570,-	0.0599344	0.0544472
hsa-miR-6724-5p	1	1	0.04	0.12	0.11	21:hsa;hsa-mir-6724-1,8205325,8205347,+	0.00428103	0.00388909
hsa-miR-3179	1	1	0.06	0.12	0.11	16:hsa;hsa-mir-3179-4,18494544,18494565,-	0.0074918	0.0068059
hsa-miR-3180-5p	1	1	0.11	0.12	0.11	16:hsa;hsa-mir-3180-2,14911237,14911261,+	0.0133188	0.0120994
hsa-miR-598-5p	1	1	1	0.12	0.11	8:hsa;hsa-mir-598,11035229,11035251,-	0.119869	0.108894
hsa-miR-141-5p	1	1	1	0.12	0.11	12:hsa;hsa-mir-141,6964113,6964134,+	0.119869	0.108894
hsa-miR-6862-5p	1	1	0.25	0.12	0.11	16:hsa;hsa-mir-6862-1,28390987,28391008,-	0.0299672	0.0272236
hsa-miR-7845-5p	1	1	1	0.12	0.11	2:hsa;hsa-mir-7845,207166402,207166422,+	0.119869	0.108894
hsa-miR-1233-3p	1	1	0.25	0.12	0.11	15:hsa;hsa-mir-1233-2,34528352,34528371,-	0.0299672	0.0272236
hsa-miR-6724-5p	1	1	0.04	0.12	0.11	21:hsa;hsa-mir-6724-4,8205325,8205347,+	0.00428103	0.00388909
hsa-miR-6724-5p	1	1	0.04	0.12	0.11	GL000220.1:hsa;hsa-mir-6724-1,148714,148736,+	0.00428103	0.00388909
hsa-miR-6724-5p	1	1	0.04	0.12	0.11	21:hsa;hsa-mir-6724-1,8249515,8249537,+	0.00428103	0.00388909
hsa-miR-192-3p	1	1	1	0.12	0.11	11:hsa;hsa-mir-192,64891203,64891224,-	0.119869	0.108894
hsa-miR-3180-5p	1	1	0.11	0.12	0.11	16:hsa;hsa-mir-3180-2,18402193,18402217,-	0.0133188	0.0120994
hsa-miR-95-3p	1	1	1	0.12	0.11	4:hsa;hsa-mir-95,8005349,8005370,-	0.119869	0.108894
hsa-miR-3919	1	1	1	0.12	0.11	3:hsa;hsa-mir-3919,159282700,159282720,+	0.119869	0.108894
hsa-miR-3179	1	1	0.06	0.12	0.11	16:hsa;hsa-mir-3179-2,18411945,18411966,-	0.0074918	0.0068059
hsa-miR-3143	1	1	1	0.12	0.11	6:hsa;hsa-mir-3143,27147629,27147653,+	0.119869	0.108894
hsa-miR-605-3p	1	1	1	0.12	0.11	10:hsa;hsa-mir-605,51299623,51299644,+	0.119869	0.108894
hsa-miR-9-3p	1	1	0.33	0.12	0.11	5:hsa;hsa-mir-9-2,88666905,88666926,-	0.0399563	0.0362981
hsa-miR-6724-5p	1	1	0.04	0.12	0.11	GL000220.1:hsa;hsa-mir-6724-3,104742,104764,+	0.00428103	0.00388909
hsa-miR-6724-5p	1	1	0.04	0.12	0.11	GL000220.1:hsa;hsa-mir-6724-4,148714,148736,+	0.00428103	0.00388909
hsa-miR-3180-5p	1	1	0.11	0.12	0.11	16:hsa;hsa-mir-3180-1,14911237,14911261,+	0.0133188	0.0120994
hsa-miR-5701	1	1	0.08	0.12	0.11	15:hsa;hsa-mir-5701-3,20940261,20940279,+	0.00998907	0.00907454
hsa-miR-3648	1	1	0.25	0.12	0.11	21:hsa;hsa-mir-3648-1,8987026,8987046,+	0.0299672	0.0272236
hsa-miR-3179	1	1	0.06	0.12	0.11	16:hsa;hsa-mir-3179-4,18411945,18411966,-	0.0074918	0.0068059
hsa-miR-659-3p	1	1	1	0.12	0.11	22:hsa;hsa-mir-659,37847738,37847759,-	0.119869	0.108894
hsa-miR-6516-5p	1	1	1	0.12	0.11	17:hsa;hsa-mir-6516,77089428,77089449,+	0.119869	0.108894
hsa-miR-3179	1	1	0.06	0.12	0.11	16:hsa;hsa-mir-3179-1,16300210,16300231,+	0.0074918	0.0068059
hsa-miR-6862-5p	1	1	0.25	0.12	0.11	16:hsa;hsa-mir-6862-1,28724257,28724278,+	0.0299672	0.0272236
hsa-miR-4439	1	1	1	0.12	0.11	2:hsa;hsa-mir-4439,225010464,225010485,-	0.119869	0.108894
hsa-miR-6724-5p	1	1	0.04	0.12	0.11	KI270733.1:hsa;hsa-mir-6724-1,121591,121613,+	0.00428103	0.00388909
hsa-miR-6724-5p	1	1	0.04	0.12	0.11	KI270733.1:hsa;hsa-mir-6724-4,121591,121613,+	0.00428103	0.00388909
hsa-miR-1269a	1	1	1	0.12	0.11	4:hsa;hsa-mir-1269a,66276890,66276911,+	0.119869	0.108894
hsa-miR-548i	1	1	0.25	0.12	0.11	8:hsa;hsa-mir-548i-3,8088979,8089000,-	0.0299672	0.0272236
hsa-miR-548i	1	1	0.25	0.12	0.11	4:hsa;hsa-mir-548i-2,9556206,9556227,-	0.0299672	0.0272236
hsa-miR-4765	1	1	1	0.12	0.11	2:hsa;hsa-mir-4765,32635300,32635321,+	0.119869	0.108894
hsa-miR-1537-5p	1	1	1	0.12	0.11	1:hsa;hsa-mir-1537,235853002,235853023,-	0.119869	0.108894
hsa-miR-1537-3p	1	1	1	0.12	0.11	1:hsa;hsa-mir-1537,235853039,235853060,-	0.119869	0.108894
hsa-miR-6724-5p	1	1	0.04	0.12	0.11	21:hsa;hsa-mir-6724-1,8432540,8432562,+	0.00428103	0.00388909
hsa-miR-6502-5p	1	1	1	0.12	0.11	12:hsa;hsa-mir-6502,66251091,66251112,+	0.119869	0.108894
hsa-miR-3180-5p	1	1	0.11	0.12	0.11	16:hsa;hsa-mir-3180-1,16309892,16309916,+	0.0133188	0.0120994
hsa-miR-3663-5p	1	1	1	0.12	0.11	10:hsa;hsa-mir-3663,117167698,117167718,-	0.119869	0.108894
hsa-miR-3166	1	1	1	0.12	0.11	11:hsa;hsa-mir-3166,88176561,88176583,+	0.119869	0.108894
hsa-miR-3180-5p	1	1	0.11	0.12	0.11	16:hsa;hsa-mir-3180-2,16309892,16309916,+	0.0133188	0.0120994
hsa-miR-5701	1	1	0.08	0.12	0.11	15:hsa;hsa-mir-5701-2,20940261,20940279,+	0.00998907	0.00907454
hsa-miR-6770-5p	1	1	0.11	0.12	0.11	16:hsa;hsa-mir-6770-2,18379356,18379379,-	0.0133188	0.0120994
hsa-miR-548ao-3p	1	1	1	0.12	0.11	8:hsa;hsa-mir-548ao,41271105,41271126,-	0.119869	0.108894
hsa-miR-4665-5p	1	1	1	0.12	0.11	9:hsa;hsa-mir-4665,6007835,6007857,+	0.119869	0.108894
hsa-miR-3179	1	1	0.06	0.12	0.11	16:hsa;hsa-mir-3179-1,14901559,14901580,+	0.0074918	0.0068059
hsa-miR-3122	1	1	1	0.12	0.11	1:hsa;hsa-mir-3122,212077622,212077643,+	0.119869	0.108894
hsa-miR-6529-5p	1	1	1	0.12	0.11	3:hsa;hsa-mir-6529,120084577,120084598,-	0.119869	0.108894
hsa-miR-194-3p	1	1	1	0.12	0.11	11:hsa;hsa-mir-194-2,64891405,64891426,-	0.119869	0.108894
hsa-miR-6793-5p	1	1	1	0.12	0.11	19:hsa;hsa-mir-6793,10828978,10828999,+	0.119869	0.108894
hsa-miR-3202	1	1	1	0.12	0.11	X:hsa;hsa-mir-3202-1,153981105,153981126,+	0.119869	0.108894
hsa-miR-6770-5p	1	1	0.11	0.12	0.11	16:hsa;hsa-mir-6770-2,16329310,16329333,+	0.0133188	0.0120994
hsa-miR-6724-5p	1	1	0.04	0.12	0.11	21:hsa;hsa-mir-6724-3,8432540,8432562,+	0.00428103	0.00388909
hsa-miR-4504	1	1	1	0.12	0.11	14:hsa;hsa-mir-4504,50299909,50299930,-	0.119869	0.108894
hsa-miR-3150a-5p	1	1	1	0.12	0.11	8:hsa;hsa-mir-3150a,95072925,95072946,+	0.119869	0.108894
hsa-miR-3124-5p	1	1	1	0.12	0.11	1:hsa;hsa-mir-3124,248826383,248826403,+	0.119869	0.108894
hsa-miR-129-2-3p	1	1	1	0.12	0.11	11:hsa;hsa-mir-129-2,43581450,43581471,+	0.119869	0.108894
hsa-miR-6827-3p	1	1	1	0.12	0.11	3:hsa;hsa-mir-6827,134367842,134367862,-	0.119869	0.108894
hsa-miR-7-5p	1	1	0.33	0.12	0.11	19:hsa;hsa-mir-7-3,4770700,4770723,+	0.0399563	0.0362981
hsa-miR-197-5p	1	1	1	0.12	0.11	1:hsa;hsa-mir-197,109598901,109598923,+	0.119869	0.108894
hsa-miR-3179	1	1	0.06	0.12	0.11	16:hsa;hsa-mir-3179-1,18494544,18494565,-	0.0074918	0.0068059
hsa-miR-6809-5p	1	1	1	0.12	0.11	2:hsa;hsa-mir-6809,217900518,217900539,-	0.119869	0.108894
hsa-miR-3913-3p	1	1	0.5	0.12	0.11	12:hsa;hsa-mir-3913-2,69584780,69584801,+	0.0599344	0.0544472
hsa-miR-6834-5p	1	1	1	0.12	0.11	6:hsa;hsa-mir-6834,33290245,33290265,+	0.119869	0.108894
hsa-miR-6724-5p	1	1	0.04	0.12	0.11	GL000220.1:hsa;hsa-mir-6724-2,148714,148736,+	0.00428103	0.00388909
hsa-miR-4676-3p	1	1	1	0.12	0.11	10:hsa;hsa-mir-4676,72721072,72721093,+	0.119869	0.108894
hsa-miR-6770-5p	1	1	0.11	0.12	0.11	16:hsa;hsa-mir-6770-3,16329310,16329333,+	0.0133188	0.0120994
hsa-miR-6829-5p	1	1	1	0.12	0.11	3:hsa;hsa-mir-6829,195882334,195882353,-	0.119869	0.108894
hsa-miR-6724-5p	1	1	0.04	0.12	0.11	21:hsa;hsa-mir-6724-3,8249515,8249537,+	0.00428103	0.00388909
hsa-miR-219b-5p	1	1	1	0.12	0.11	9:hsa;hsa-mir-219b,128392634,128392655,+	0.119869	0.108894
hsa-miR-500b-3p	1	1	1	0.12	0.11	X:hsa;hsa-mir-500b,50010722,50010741,+	0.119869	0.108894
hsa-miR-6724-5p	1	1	0.04	0.12	0.11	21:hsa;hsa-mir-6724-4,8432540,8432562,+	0.00428103	0.00388909
hsa-miR-6724-5p	1	1	0.04	0.12	0.11	21:hsa;hsa-mir-6724-2,8432540,8432562,+	0.00428103	0.00388909
hsa-miR-6724-5p	1	1	0.04	0.12	0.11	KI270733.1:hsa;hsa-mir-6724-3,121591,121613,+	0.00428103	0.00388909
hsa-miR-5701	1	1	0.08	0.12	0.11	15:hsa;hsa-mir-5701-2,21951251,21951269,+	0.00998907	0.00907454
hsa-miR-6784-3p	1	1	1	0.12	0.11	17:hsa;hsa-mir-6784,45114412,45114433,-	0.119869	0.108894
hsa-miR-6740-5p	1	1	1	0.12	0.11	1:hsa;hsa-mir-6740,202003129,202003150,+	0.119869	0.108894
hsa-miR-9-3p	1	1	0.33	0.12	0.11	1:hsa;hsa-mir-9-1,156420395,156420416,-	0.0399563	0.0362981
hsa-miR-3179	1	1	0.06	0.12	0.11	16:hsa;hsa-mir-3179-2,16300210,16300231,+	0.0074918	0.0068059
hsa-miR-9899	1	1	1	0.12	0.11	2:hsa;hsa-mir-9899,149330330,149330351,-	0.119869	0.108894
hsa-miR-4781-3p	1	1	1	0.12	0.11	1:hsa;hsa-mir-4781,54054124,54054145,+	0.119869	0.108894
hsa-miR-6850-3p	1	1	1	0.12	0.11	8:hsa;hsa-mir-6850,144791968,144791987,-	0.119869	0.108894
hsa-miR-3155a	1	1	1	0.12	0.11	10:hsa;hsa-mir-3155a,6152247,6152267,+	0.119869	0.108894
hsa-miR-6780a-5p	1	1	1	0.12	0.11	17:hsa;hsa-mir-6780a,42708089,42708111,-	0.119869	0.108894
hsa-miR-4761-5p	1	1	1	0.12	0.11	22:hsa;hsa-mir-4761,19963755,19963775,+	0.119869	0.108894
hsa-miR-4640-3p	1	1	1	0.12	0.11	6:hsa;hsa-mir-4640,30890949,30890970,+	0.119869	0.108894
hsa-miR-301b-5p	1	1	1	0.12	0.11	22:hsa;hsa-mir-301b,21652990,21653011,+	0.119869	0.108894
hsa-miR-3179	1	1	0.06	0.12	0.11	16:hsa;hsa-mir-3179-3,18494544,18494565,-	0.0074918	0.0068059
hsa-miR-9-3p	1	1	0.33	0.12	0.11	15:hsa;hsa-mir-9-3,89368071,89368092,+	0.0399563	0.0362981
hsa-miR-3179	1	1	0.06	0.12	0.11	16:hsa;hsa-mir-3179-3,18411945,18411966,-	0.0074918	0.0068059
hsa-miR-190b-5p	1	1	1	0.12	0.11	1:hsa;hsa-mir-190b,154193675,154193696,-	0.119869	0.108894
hsa-miR-6862-5p	1	1	0.25	0.12	0.11	16:hsa;hsa-mir-6862-2,28390987,28391008,-	0.0299672	0.0272236
hsa-miR-3074-5p	1	1	1	0.12	0.11	9:hsa;hsa-mir-3074,95086025,95086045,-	0.119869	0.108894
hsa-miR-6724-5p	1	1	0.04	0.12	0.11	21:hsa;hsa-mir-6724-4,8388372,8388394,+	0.00428103	0.00388909
hsa-miR-6754-3p	1	1	1	0.12	0.11	11:hsa;hsa-mir-6754,71473546,71473567,+	0.119869	0.108894
hsa-miR-6770-5p	1	1	0.11	0.12	0.11	16:hsa;hsa-mir-6770-3,14930825,14930848,+	0.0133188	0.0120994
hsa-miR-5701	1	1	0.08	0.12	0.11	15:hsa;hsa-mir-5701-1,21951251,21951269,+	0.00998907	0.00907454
hsa-miR-548a-3p	1	1	0.33	0.12	0.11	8:hsa;hsa-mir-548a-3,104484429,104484450,-	0.0399563	0.0362981
hsa-miR-4688	1	1	1	0.12	0.11	11:hsa;hsa-mir-4688,46376456,46376477,+	0.119869	0.108894
hsa-miR-3648	1	1	0.25	0.12	0.11	21:hsa;hsa-mir-3648-2,8208500,8208520,+	0.0299672	0.0272236
hsa-miR-3175	1	1	1	0.12	0.11	15:hsa;hsa-mir-3175,92904408,92904429,+	0.119869	0.108894
hsa-miR-6757-5p	1	1	1	0.12	0.11	12:hsa;hsa-mir-6757,53056949,53056970,+	0.119869	0.108894
hsa-miR-6757-3p	1	1	1	0.12	0.11	12:hsa;hsa-mir-6757,53056990,53057011,+	0.119869	0.108894
hsa-miR-4467	1	1	1	0.12	0.11	7:hsa;hsa-mir-4467,102471472,102471493,+	0.119869	0.108894
hsa-miR-607	1	1	1	0.12	0.11	10:hsa;hsa-mir-607,96828729,96828749,-	0.119869	0.108894
hsa-miR-3938	1	1	1	0.12	0.11	3:hsa;hsa-mir-3938,55852550,55852571,-	0.119869	0.108894
hsa-miR-4709-3p	1	1	1	0.12	0.11	14:hsa;hsa-mir-4709,74480180,74480202,-	0.119869	0.108894
hsa-miR-6770-5p	1	1	0.11	0.12	0.11	16:hsa;hsa-mir-6770-1,14930825,14930848,+	0.0133188	0.0120994
hsa-miR-6724-5p	1	1	0.04	0.12	0.11	GL000220.1:hsa;hsa-mir-6724-2,104742,104764,+	0.00428103	0.00388909
hsa-miR-6512-5p	1	1	1	0.12	0.11	2:hsa;hsa-mir-6512,177313814,177313835,-	0.119869	0.108894
hsa-miR-636	1	1	1	0.12	0.11	17:hsa;hsa-mir-636,76736510,76736532,-	0.119869	0.108894
hsa-miR-5701	1	1	0.08	0.12	0.11	15:hsa;hsa-mir-5701-1,20940261,20940279,+	0.00998907	0.00907454
hsa-miR-3648	1	1	0.25	0.12	0.11	21:hsa;hsa-mir-3648-1,8208500,8208520,+	0.0299672	0.0272236
hsa-miR-216a-5p	1	1	1	0.12	0.11	2:hsa;hsa-mir-216a,55988968,55988989,-	0.119869	0.108894
hsa-miR-216a-3p	1	1	1	0.12	0.11	2:hsa;hsa-mir-216a,55989007,55989028,-	0.119869	0.108894
hsa-miR-4699-5p	1	1	1	0.12	0.11	12:hsa;hsa-mir-4699,81158397,81158418,+	0.119869	0.108894
hsa-miR-4699-3p	1	1	1	0.12	0.11	12:hsa;hsa-mir-4699,81158433,81158454,+	0.119869	0.108894
hsa-miR-6862-5p	1	1	0.25	0.12	0.11	16:hsa;hsa-mir-6862-2,28724257,28724278,+	0.0299672	0.0272236
hsa-miR-586	1	1	1	0.12	0.11	6:hsa;hsa-mir-586,45197689,45197710,-	0.119869	0.108894
hsa-miR-4691-3p	1	1	1	0.12	0.11	11:hsa;hsa-mir-4691,68033949,68033971,+	0.119869	0.108894
hsa-miR-4672	1	1	1	0.12	0.11	9:hsa;hsa-mir-4672,127869465,127869485,-	0.119869	0.108894
hsa-miR-1343-5p	1	1	1	0.12	0.11	11:hsa;hsa-mir-1343,34941851,34941872,+	0.119869	0.108894
hsa-miR-6753-3p	1	1	1	0.12	0.11	11:hsa;hsa-mir-6753,68044932,68044953,+	0.119869	0.108894
hsa-miR-3179	1	1	0.06	0.12	0.11	16:hsa;hsa-mir-3179-3,14901559,14901580,+	0.0074918	0.0068059
hsa-miR-338-5p	1	1	1	0.12	0.11	17:hsa;hsa-mir-338,81125888,81125909,-	0.119869	0.108894
hsa-miR-6815-5p	1	1	1	0.12	0.11	21:hsa;hsa-mir-6815,45478271,45478293,+	0.119869	0.108894
hsa-miR-6815-3p	1	1	1	0.12	0.11	21:hsa;hsa-mir-6815,45478306,45478326,+	0.119869	0.108894
hsa-miR-6724-5p	1	1	0.04	0.12	0.11	21:hsa;hsa-mir-6724-2,8249515,8249537,+	0.00428103	0.00388909
hsa-miR-3180-5p	1	1	0.11	0.12	0.11	16:hsa;hsa-mir-3180-3,16309892,16309916,+	0.0133188	0.0120994
hsa-miR-6724-5p	1	1	0.04	0.12	0.11	21:hsa;hsa-mir-6724-3,8205325,8205347,+	0.00428103	0.00388909
hsa-miR-3179	1	1	0.06	0.12	0.11	16:hsa;hsa-mir-3179-4,14901559,14901580,+	0.0074918	0.0068059
hsa-miR-3179	1	1	0.06	0.12	0.11	16:hsa;hsa-mir-3179-4,16300210,16300231,+	0.0074918	0.0068059
hsa-miR-5701	1	1	0.08	0.12	0.11	15:hsa;hsa-mir-5701-2,21513968,21513986,+	0.00998907	0.00907454
hsa-miR-3164	1	1	1	0.12	0.11	11:hsa;hsa-mir-3164,69083185,69083206,+	0.119869	0.108894
hsa-miR-1233-3p	1	1	0.25	0.12	0.11	15:hsa;hsa-mir-1233-2,34382131,34382150,-	0.0299672	0.0272236
hsa-miR-4482-3p	1	1	1	0.12	0.11	10:hsa;hsa-mir-4482,104268379,104268400,-	0.119869	0.108894
hsa-miR-96-5p	1	1	1	0.12	0.11	7:hsa;hsa-mir-96,129774700,129774722,-	0.119869	0.108894
hsa-miR-184	1	1	1	0.12	0.11	15:hsa;hsa-mir-184,79209840,79209861,+	0.119869	0.108894
hsa-miR-550a-3-5p	1	1	0.33	0.12	0.11	7:hsa;hsa-mir-550a-3,29680754,29680773,-	0.0399563	0.0362981
hsa-miR-302a-5p	1	1	1	0.12	0.11	4:hsa;hsa-mir-302a,112648188,112648210,-	0.119869	0.108894
hsa-miR-302a-3p	1	1	1	0.12	0.11	4:hsa;hsa-mir-302a,112648226,112648248,-	0.119869	0.108894
hsa-miR-6724-5p	1	1	0.04	0.12	0.11	21:hsa;hsa-mir-6724-1,8388372,8388394,+	0.00428103	0.00388909
hsa-miR-5701	1	1	0.08	0.12	0.11	KI270727.1:hsa;hsa-mir-5701-3,241102,241120,+	0.00998907	0.00907454
hsa-miR-4653-5p	1	1	1	0.12	0.11	7:hsa;hsa-mir-4653,101159482,101159503,+	0.119869	0.108894
hsa-miR-4796-5p	1	1	1	0.12	0.11	3:hsa;hsa-mir-4796,114743453,114743474,-	0.119869	0.108894
hsa-miR-4796-3p	1	1	1	0.12	0.11	3:hsa;hsa-mir-4796,114743497,114743518,-	0.119869	0.108894
hsa-miR-766-5p	1	1	1	0.12	0.11	X:hsa;hsa-mir-766,119646766,119646787,-	0.119869	0.108894
hsa-miR-4773	1	1	0.5	0.12	0.11	2:hsa;hsa-mir-4773-2,151368381,151368402,-	0.0599344	0.0544472
hsa-miR-6511b-3p	1	1	0.25	0.12	0.11	16:hsa;hsa-mir-6511b-2,2106725,2106747,-	0.0299672	0.0272236
hsa-miR-4685-3p	1	1	1	0.12	0.11	10:hsa;hsa-mir-4685,98431339,98431360,-	0.119869	0.108894
hsa-miR-19b-1-5p	1	1	1	0.12	0.11	13:hsa;hsa-mir-19b-1,91351207,91351229,+	0.119869	0.108894
hsa-miR-6724-5p	1	1	0.04	0.12	0.11	21:hsa;hsa-mir-6724-3,8388372,8388394,+	0.00428103	0.00388909
hsa-miR-6824-3p	1	1	1	0.12	0.11	3:hsa;hsa-mir-6824,48633678,48633698,-	0.119869	0.108894
hsa-miR-150-5p	1	1	1	0.12	0.11	19:hsa;hsa-mir-150,49500800,49500821,-	0.119869	0.108894
hsa-miR-548aq-5p	1	1	1	0.12	0.11	3:hsa;hsa-mir-548aq,185767847,185767868,-	0.119869	0.108894
hsa-miR-3179	1	1	0.06	0.12	0.11	16:hsa;hsa-mir-3179-1,18411945,18411966,-	0.0074918	0.0068059
hsa-miR-4666a-3p	1	1	1	0.12	0.11	1:hsa;hsa-mir-4666a,228462125,228462145,+	0.119869	0.108894
hsa-miR-6748-5p	1	1	1	0.12	0.11	11:hsa;hsa-mir-6748,62789820,62789841,+	0.119869	0.108894
hsa-miR-6724-5p	1	1	0.04	0.12	0.11	GL000220.1:hsa;hsa-mir-6724-1,104742,104764,+	0.00428103	0.00388909
hsa-miR-3913-3p	1	1	0.5	0.12	0.11	12:hsa;hsa-mir-3913-1,69584780,69584801,-	0.0599344	0.0544472
hsa-miR-4457	1	1	1	0.12	0.11	5:hsa;hsa-mir-4457,1309352,1309373,-	0.119869	0.108894
hsa-miR-6511b-3p	1	1	0.25	0.12	0.11	16:hsa;hsa-mir-6511b-2,15134122,15134144,-	0.0299672	0.0272236
hsa-miR-4802-5p	1	1	1	0.12	0.11	4:hsa;hsa-mir-4802,40502052,40502073,-	0.119869	0.108894
hsa-miR-450b-3p	1	1	1	0.12	0.11	X:hsa;hsa-mir-450b,134540232,134540253,-	0.119869	0.108894
hsa-miR-5701	1	1	0.08	0.12	0.11	15:hsa;hsa-mir-5701-1,21513968,21513986,+	0.00998907	0.00907454
hsa-miR-6724-5p	1	1	0.04	0.12	0.11	21:hsa;hsa-mir-6724-2,8388372,8388394,+	0.00428103	0.00388909
hsa-miR-548a-3p	1	1	0.33	0.12	0.11	6:hsa;hsa-mir-548a-1,18571844,18571865,+	0.0399563	0.0362981
hsa-miR-6724-5p	1	1	0.04	0.12	0.11	21:hsa;hsa-mir-6724-2,8205325,8205347,+	0.00428103	0.00388909
hsa-miR-4638-5p	1	1	1	0.12	0.11	5:hsa;hsa-mir-4638,181222567,181222587,-	0.119869	0.108894
hsa-miR-3189-3p	1	1	1	0.12	0.11	19:hsa;hsa-mir-3189,18386607,18386627,+	0.119869	0.108894
hsa-miR-4773	1	1	0.5	0.12	0.11	2:hsa;hsa-mir-4773-1,151368381,151368402,+	0.0599344	0.0544472
hsa-miR-4750-5p	1	1	1	0.12	0.11	19:hsa;hsa-mir-4750,49888177,49888198,+	0.119869	0.108894
hsa-miR-4750-3p	1	1	1	0.12	0.11	19:hsa;hsa-mir-4750,49888209,49888230,+	0.119869	0.108894
hsa-miR-6733-5p	1	1	1	0.12	0.11	1:hsa;hsa-mir-6733,43171657,43171678,-	0.119869	0.108894
hsa-miR-6894-5p	1	1	1	0.12	0.11	X:hsa;hsa-mir-6894,53198894,53198917,-	0.119869	0.108894
hsa-miR-7-5p	1	1	0.33	0.12	0.11	15:hsa;hsa-mir-7-2,88611856,88611879,+	0.0399563	0.0362981
hsa-miR-6741-3p	1	1	1	0.12	0.11	1:hsa;hsa-mir-6741,225922121,225922142,-	0.119869	0.108894
hsa-miR-3619-5p	1	1	1	0.12	0.11	22:hsa;hsa-mir-3619,46091059,46091080,+	0.119869	0.108894
hsa-miR-3199	1	1	0.5	0.12	0.11	22:hsa;hsa-mir-3199-1,27920534,27920556,-	0.0599344	0.0544472
hsa-miR-6125	1	1	1	0.12	0.11	12:hsa;hsa-mir-6125,62260418,62260437,+	0.119869	0.108894
hsa-miR-6865-5p	1	1	1	0.12	0.11	17:hsa;hsa-mir-6865,4970091,4970113,-	0.119869	0.108894
hsa-miR-6724-5p	1	1	0.04	0.12	0.11	21:hsa;hsa-mir-6724-4,8249515,8249537,+	0.00428103	0.00388909
hsa-miR-4512	1	1	1	0.12	0.11	15:hsa;hsa-mir-4512,66497006,66497027,-	0.119869	0.108894
hsa-miR-3662	1	1	1	0.12	0.11	6:hsa;hsa-mir-3662,134979392,134979415,-	0.119869	0.108894
hsa-miR-3926	1	1	0.5	0.12	0.11	8:hsa;hsa-mir-3926-2,12727242,12727262,+	0.0599344	0.0544472
hsa-miR-4687-3p	1	1	1	0.12	0.11	11:hsa;hsa-mir-4687,3856113,3856133,+	0.119869	0.108894
hsa-miR-548d-3p	1	1	0.5	0.12	0.11	8:hsa;hsa-mir-548d-1,123348094,123348115,-	0.0599344	0.0544472
hsa-miR-5701	1	1	0.08	0.12	0.11	15:hsa;hsa-mir-5701-3,21513968,21513986,+	0.00998907	0.00907454
hsa-miR-3668	1	1	1	0.12	0.11	6:hsa;hsa-mir-3668,140205260,140205280,+	0.119869	0.108894
hsa-miR-6840-3p	1	1	1	0.12	0.11	7:hsa;hsa-mir-6840,100356696,100356717,+	0.119869	0.108894
hsa-miR-215-3p	1	1	1	0.12	0.11	1:hsa;hsa-mir-215,220117916,220117938,-	0.119869	0.108894
hsa-miR-3181	1	1	1	0.12	0.11	16:hsa;hsa-mir-3181,50742313,50742331,+	0.119869	0.108894
hsa-miR-7975	1	1	1	0.12	0.11	19:hsa;hsa-mir-7975,55123275,55123292,-	0.119869	0.108894
hsa-miR-4671-5p	1	1	1	0.12	0.11	1:hsa;hsa-mir-4671,234306476,234306497,+	0.119869	0.108894
hsa-miR-3133	1	1	1	0.12	0.11	2:hsa;hsa-mir-3133,241477914,241477935,+	0.119869	0.108894
hsa-miR-4442	1	1	1	0.12	0.11	3:hsa;hsa-mir-4442,25664921,25664937,-	0.119869	0.108894
hsa-miR-6508-5p	1	1	1	0.12	0.11	21:hsa;hsa-mir-6508,39447014,39447034,+	0.119869	0.108894
hsa-miR-6509-5p	1	1	1	0.12	0.11	7:hsa;hsa-mir-6509,135207008,135207028,-	0.119869	0.108894
hsa-miR-6509-3p	1	1	1	0.12	0.11	7:hsa;hsa-mir-6509,135207045,135207066,-	0.119869	0.108894
hsa-miR-3180-5p	1	1	0.11	0.12	0.11	16:hsa;hsa-mir-3180-3,14911237,14911261,+	0.0133188	0.0120994
hsa-miR-6746-5p	1	1	1	0.12	0.11	11:hsa;hsa-mir-6746,61878221,61878242,-	0.119869	0.108894
hsa-miR-6746-3p	1	1	1	0.12	0.11	11:hsa;hsa-mir-6746,61878257,61878278,-	0.119869	0.108894
hsa-miR-6770-5p	1	1	0.11	0.12	0.11	16:hsa;hsa-mir-6770-1,18379356,18379379,-	0.0133188	0.0120994
hsa-miR-3926	1	1	0.5	0.12	0.11	8:hsa;hsa-mir-3926-1,12727242,12727262,-	0.0599344	0.0544472
hsa-miR-548i	1	1	0.25	0.12	0.11	X:hsa;hsa-mir-548i-4,84225762,84225783,-	0.0299672	0.0272236
hsa-miR-4803	1	1	1	0.12	0.11	5:hsa;hsa-mir-4803,72169476,72169496,+	0.119869	0.108894
hsa-miR-4999-5p	1	1	1	0.12	0.11	19:hsa;hsa-mir-4999,8389310,8389330,-	0.119869	0.108894
hsa-miR-3620-3p	1	1	1	0.12	0.11	1:hsa;hsa-mir-3620,228097320,228097341,+	0.119869	0.108894
hsa-miR-5701	1	1	0.08	0.12	0.11	KI270727.1:hsa;hsa-mir-5701-2,241102,241120,+	0.00998907	0.00907454
hsa-miR-1910-3p	1	1	1	0.12	0.11	16:hsa;hsa-mir-1910,85741671,85741690,-	0.119869	0.108894
hsa-miR-5585-5p	1	1	1	0.12	0.11	1:hsa;hsa-mir-5585,32086949,32086970,+	0.119869	0.108894
hsa-miR-4684-3p	1	1	1	0.12	0.11	1:hsa;hsa-mir-4684,22719566,22719587,+	0.119869	0.108894
hsa-miR-8072	1	1	1	0.12	0.11	12:hsa;hsa-mir-8072,123364774,123364793,-	0.119869	0.108894
hsa-miR-155-3p	1	1	1	0.12	0.11	21:hsa;hsa-mir-155,25574022,25574043,+	0.119869	0.108894
hsa-miR-6876-5p	1	1	1	0.12	0.11	8:hsa;hsa-mir-6876,25345407,25345428,+	0.119869	0.108894
hsa-miR-3659	1	1	1	0.12	0.11	1:hsa;hsa-mir-3659,38089289,38089309,+	0.119869	0.108894
hsa-miR-5701	1	1	0.08	0.12	0.11	15:hsa;hsa-mir-5701-3,21951251,21951269,+	0.00998907	0.00907454
hsa-miR-616-3p	1	1	1	0.12	0.11	12:hsa;hsa-mir-616,57519218,57519239,-	0.119869	0.108894
hsa-miR-4795-3p	1	1	1	0.12	0.11	3:hsa;hsa-mir-4795,87226246,87226267,-	0.119869	0.108894
hsa-miR-6770-5p	1	1	0.11	0.12	0.11	16:hsa;hsa-mir-6770-3,18379356,18379379,-	0.0133188	0.0120994
hsa-miR-3126-3p	1	1	1	0.12	0.11	2:hsa;hsa-mir-3126,69103727,69103748,+	0.119869	0.108894
hsa-miR-6724-5p	1	1	0.04	0.12	0.11	GL000220.1:hsa;hsa-mir-6724-3,148714,148736,+	0.00428103	0.00388909
hsa-miR-4755-3p	1	1	1	0.12	0.11	20:hsa;hsa-mir-4755,34049162,34049183,+	0.119869	0.108894
hsa-miR-2276-5p	1	1	1	0.12	0.11	13:hsa;hsa-mir-2276,24162431,24162452,+	0.119869	0.108894
hsa-miR-2276-3p	1	1	1	0.12	0.11	13:hsa;hsa-mir-2276,24162469,24162490,+	0.119869	0.108894
hsa-miR-1913	1	1	1	0.12	0.11	6:hsa;hsa-mir-1913,166509402,166509423,-	0.119869	0.108894
hsa-miR-5696	1	1	1	0.12	0.11	2:hsa;hsa-mir-5696,101309453,101309474,+	0.119869	0.108894
hsa-miR-6864-5p	1	1	1	0.12	0.11	17:hsa;hsa-mir-6864,4969707,4969730,-	0.119869	0.108894
hsa-miR-3188	1	1	1	0.12	0.11	19:hsa;hsa-mir-3188,18282129,18282151,+	0.119869	0.108894
hsa-miR-5093	1	1	1	0.12	0.11	16:hsa;hsa-mir-5093,85306293,85306315,-	0.119869	0.108894
hsa-miR-4731-5p	1	1	1	0.12	0.11	17:hsa;hsa-mir-4731,15251636,15251657,-	0.119869	0.108894
hsa-miR-4731-3p	1	1	1	0.12	0.11	17:hsa;hsa-mir-4731,15251668,15251689,-	0.119869	0.108894
hsa-miR-4751	1	1	1	0.12	0.11	19:hsa;hsa-mir-4751,49933073,49933096,+	0.119869	0.108894
hsa-miR-15a-3p	1	1	1	0.12	0.11	13:hsa;hsa-mir-15a,50049169,50049190,-	0.119869	0.108894
hsa-miR-3616-3p	1	1	1	0.12	0.11	20:hsa;hsa-mir-3616,47167026,47167048,+	0.119869	0.108894
hsa-miR-3179	1	1	0.06	0.12	0.11	16:hsa;hsa-mir-3179-2,14901559,14901580,+	0.0074918	0.0068059
hsa-miR-4485-3p	1	1	1	0.12	0.11	11:hsa;hsa-mir-4485,10508300,10508319,-	0.119869	0.108894
hsa-miR-548a-3p	1	1	0.33	0.12	0.11	6:hsa;hsa-mir-548a-2,135239220,135239241,+	0.0399563	0.0362981
hsa-miR-5009-5p	1	1	1	0.12	0.11	15:hsa;hsa-mir-5009,89883951,89883974,-	0.119869	0.108894
hsa-miR-6747-3p	1	1	1	0.12	0.11	11:hsa;hsa-mir-6747,62567051,62567071,-	0.119869	0.108894
hsa-miR-3199	1	1	0.5	0.12	0.11	22:hsa;hsa-mir-3199-2,27920535,27920557,+	0.0599344	0.0544472
hsa-miR-3183	1	1	1	0.12	0.11	17:hsa;hsa-mir-3183,1022485,1022506,-	0.119869	0.108894
hsa-miR-3648	1	1	0.25	0.12	0.11	21:hsa;hsa-mir-3648-2,8987026,8987046,+	0.0299672	0.0272236
hsa-miR-4644	1	1	1	0.12	0.11	6:hsa;hsa-mir-4644,170330813,170330835,+	0.119869	0.108894
hsa-miR-4517	1	1	1	0.12	0.11	16:hsa;hsa-mir-4517,28958587,28958611,+	0.119869	0.108894
hsa-miR-6770-5p	1	1	0.11	0.12	0.11	16:hsa;hsa-mir-6770-1,16329310,16329333,+	0.0133188	0.0120994
hsa-miR-579-3p	1	1	1	0.12	0.11	5:hsa;hsa-mir-579,32394439,32394461,-	0.119869	0.108894
hsa-miR-5189-5p	1	1	1	0.12	0.11	16:hsa;hsa-mir-5189,88468943,88468966,+	0.119869	0.108894
hsa-miR-4637	1	1	1	0.12	0.11	5:hsa;hsa-mir-4637,14825988,14826009,-	0.119869	0.108894
hsa-miR-4804-5p	1	1	1	0.12	0.11	5:hsa;hsa-mir-4804,72878600,72878620,+	0.119869	0.108894
hsa-miR-642b-3p	1	1	1	0.12	0.11	19:hsa;hsa-mir-642b,45674978,45674999,-	0.119869	0.108894
hsa-miR-3180-5p	1	1	0.11	0.12	0.11	16:hsa;hsa-mir-3180-1,18402195,18402219,-	0.0133188	0.0120994
hsa-miR-3180-5p	1	1	0.11	0.12	0.11	16:hsa;hsa-mir-3180-3,18402195,18402219,-	0.0133188	0.0120994
hsa-miR-3179	1	1	0.06	0.12	0.11	16:hsa;hsa-mir-3179-3,16300210,16300231,+	0.0074918	0.0068059
hsa-miR-6724-5p	1	1	0.04	0.12	0.11	KI270733.1:hsa;hsa-mir-6724-2,121591,121613,+	0.00428103	0.00388909
hsa-miR-760	1	1	1	0.12	0.11	1:hsa;hsa-mir-760,93846880,93846899,+	0.119869	0.108894

## Sheet: mock-hsv1
Table S3: Human (hsa-) and herpes simplex virus 1 (hsv1-) mature miRNAs detected in mock samples, and at 10 h.p.i., and 24 h.p.i.
HFF mock - HSV-1 miRNAs
name	unique reads	read count	read count (mult. map. adj.)	RPM (lib)	RPM (total)	coordinateString	RPM_adj (lib)	RPM_adj (total)
hsv1-miR-H4-3p	5	14	7	1.68	1.52	NC_001806;hsv1-mir-H4,470,491,-	0.839082	0.762261
hsv1-miR-H4-3p	5	14	7	1.68	1.52	NC_001806;hsv1-mir-H4,125930,125951,+	0.839082	0.762261
hsv1-miR-H6-3p	11	13	6.5	1.56	1.42	NC_001806;hsv1-mir-H6,8025,8045,+	0.779147	0.707814
hsv1-miR-H6-3p	11	13	6.5	1.56	1.42	NC_001806;hsv1-mir-H6,118370,118390,-	0.779147	0.707814
hsv1-miR-H2-3p	3	6	3	0.72	0.65	NC_001806;hsv1-mir-H2,4519,4542,-	0.359606	0.326683
hsv1-miR-H2-3p	3	6	3	0.72	0.65	NC_001806;hsv1-mir-H2,121873,121896,+	0.359606	0.326683
hsv1-miR-H12	1	1	0.5	0.12	0.11	NC_001806;hsv1-mir-H12,132012,132033,-	0.0599344	0.0544472
hsv1-miR-H12	1	1	0.5	0.12	0.11	NC_001806;hsv1-mir-H12,146202,146223,+	0.0599344	0.0544472

## Sheet: 10hpi-all
Table S3: Human (hsa-) and herpes simplex virus 1 (hsv1-) mature miRNAs detected in mock samples, and at 10 h.p.i., and 24 h.p.i.
HFF 10 h.p.i. - all miRNAs
name	unique reads	read count	read count (mult. map. adj.)	RPM (lib)	RPM (total)	coordinateString	RPM_adj (lib)	RPM_adj (total)
hsa-miR-22-3p	299	927604	927604	138761	131366	17:hsa;hsa-mir-22,1713955,1713976,-	138761	131366
hsa-miR-21-5p	667	690086	690086	103230	97729.1	17:hsa;hsa-mir-21,59841273,59841294,+	103230	97729.1
hsa-miR-143-3p	736	462522	462522	69188.9	65501.8	5:hsa;hsa-mir-143,149428978,149428998,+	69188.9	65501.8
hsa-miR-27b-3p	719	451974	451148	67611	64008	9:hsa;hsa-mir-27b,95085505,95085525,+	67487.5	63891
hsa-miR-26a-5p	548	424653	212412	63524	60138.8	12:hsa;hsa-mir-26a-2,57824622,57824643,-	31774.8	30081.5
hsa-miR-26a-5p	531	424530	212289	63505.6	60121.4	3:hsa;hsa-mir-26a-1,37969413,37969434,+	31756.4	30064.1
hsa-let-7f-5p	387	383289	198623	57336.4	54280.9	X:hsa;hsa-let-7f-2,53557199,53557220,-	29712.1	28128.7
hsa-let-7f-5p	323	370587	185925	55436.3	52482.1	9:hsa;hsa-let-7f-1,94176353,94176374,+	27812.6	26330.5
hsa-miR-181a-5p	468	356508	178256	53330.2	50488.2	1:hsa;hsa-mir-181a-1,198859067,198859089,-	26665.4	25244.4
hsa-miR-181a-5p	467	356504	178252	53329.6	50487.6	9:hsa;hsa-mir-181a-2,124692480,124692502,+	26664.8	25243.8
hsa-let-7a-5p	436	349559	117079	52290.7	49504.1	22:hsa;hsa-let-7a-3,46112752,46112773,+	17513.9	16580.6
hsa-let-7a-5p	446	349417	116917	52269.4	49484	11:hsa;hsa-let-7a-2,122146526,122146547,-	17489.6	16557.6
hsa-let-7a-5p	429	348726	116225	52166.1	49386.1	9:hsa;hsa-let-7a-1,94175962,94175983,+	17386.1	16459.6
hsa-miR-199a-3p	852	244283	82749.8	36542.4	34595	1:hsa;hsa-mir-199a-2,172144604,172144625,-	12378.6	11718.9
hsa-miR-199b-3p	778	242386	80814.8	36258.6	34326.4	9:hsa;hsa-mir-199b,128244785,128244806,-	12089.1	11444.9
hsa-miR-199a-3p	764	242360	80799.3	36254.7	34322.7	19:hsa;hsa-mir-199a-1,10817472,10817493,-	12086.8	11442.7
hsa-miR-127-3p	1278	235085	235085	35166.5	33292.4	14:hsa;hsa-mir-127,100883035,100883056,+	35166.5	33292.4
hsa-miR-222-3p	504	167577	167577	25067.9	23732	X:hsa;hsa-mir-222,45747083,45747103,-	25067.9	23732
hsa-let-7i-5p	338	163867	163702	24512.9	23206.6	12:hsa;hsa-let-7i,62603691,62603712,+	24488.3	23183.3
hsa-miR-191-5p	262	125849	125849	18825.8	17822.6	3:hsa;hsa-mir-191,49020633,49020655,-	18825.8	17822.6
hsa-miR-30a-5p	379	95016	94986	14213.5	13456	6:hsa;hsa-mir-30a,71403556,71403577,-	14209	13451.8
hsa-miR-92a-3p	704	92786	49626.5	13879.9	13140.2	13:hsa;hsa-mir-92a-1,91351361,91351382,+	7423.65	7028.04
hsa-miR-92a-3p	637	87953	44793.5	13156.9	12455.8	X:hsa;hsa-mir-92a-2,134169585,134169606,-	6700.68	6343.6
hsa-miR-16-5p	160	78281	39204.5	11710.1	11086	3:hsa;hsa-mir-16-2,160404754,160404775,+	5864.62	5552.09
hsa-miR-16-5p	158	78203	39126.5	11698.4	11075	13:hsa;hsa-mir-16-1,50048986,50049007,-	5852.95	5541.04
hsa-miR-151a-3p	559	74239	74239	11105.4	10513.6	8:hsa;hsa-mir-151a,140732610,140732630,-	11105.4	10513.6
hsa-miR-31-5p	219	61904	61904	9260.25	8766.76	9:hsa;hsa-mir-31,21512122,21512142,-	9260.25	8766.76
hsa-miR-100-5p	278	56570	56527	8462.33	8011.37	11:hsa;hsa-mir-100,122152241,122152262,-	8455.9	8005.28
hsa-miR-221-3p	400	53479	53479	7999.95	7573.63	X:hsa;hsa-mir-221,45746221,45746243,-	7999.95	7573.63
hsa-miR-29a-3p	357	52373	52368.8	7834.5	7417	7:hsa;hsa-mir-29a,130876788,130876809,-	7833.88	7416.41
hsa-miR-411-5p	188	52305	52305	7824.33	7407.37	14:hsa;hsa-mir-411,101023340,101023360,+	7824.33	7407.37
hsa-miR-30d-5p	285	47967	47936	7175.4	6793.02	8:hsa;hsa-mir-30d,134804881,134804902,-	7170.77	6788.63
hsa-miR-27a-3p	361	42703	41921.8	6387.96	6047.54	19:hsa;hsa-mir-27a,13836490,13836510,-	6271.11	5936.92
hsa-miR-181b-5p	376	39235	20027	5869.18	5556.41	9:hsa;hsa-mir-181b-2,124693725,124693747,+	2995.85	2836.2
hsa-miR-181b-5p	378	39187	19979	5862	5549.61	1:hsa;hsa-mir-181b-1,198858908,198858930,-	2988.67	2829.4
hsa-miR-28-3p	176	38645	38645	5780.92	5472.85	3:hsa;hsa-mir-28,188688834,188688855,+	5780.92	5472.85
hsa-let-7b-5p	402	37870	36619.3	5664.99	5363.1	22:hsa;hsa-let-7b,46113691,46113712,+	5477.9	5185.99
hsa-miR-151a-5p	101	37748	37296.5	5646.74	5345.82	8:hsa;hsa-mir-151a,140732574,140732594,-	5579.2	5281.88
hsa-miR-103a-3p	355	34094	16455.3	5100.14	4828.35	20:hsa;hsa-mir-103a-2,3917541,3917563,+	2461.56	2330.38
hsa-miR-103a-3p	345	33970	16331.8	5081.59	4810.79	5:hsa;hsa-mir-103a-1,168560943,168560965,-	2443.09	2312.89
hsa-miR-30e-5p	238	32105	32091	4802.6	4546.67	1:hsa;hsa-mir-30e,40754371,40754392,+	4800.51	4544.69
hsa-miR-125b-5p	224	32056	16107	4795.27	4539.73	11:hsa;hsa-mir-125b-1,122099771,122099792,-	2409.45	2281.05
hsa-miR-125b-5p	222	32002	16053	4787.19	4532.08	21:hsa;hsa-mir-125b-2,16590253,16590274,+	2401.38	2273.41
hsa-miR-654-3p	326	30843	30843	4613.82	4367.95	14:hsa;hsa-mir-654,101040269,101040290,+	4613.82	4367.95
hsa-let-7g-5p	197	30403	30131.7	4548	4305.63	3:hsa;hsa-let-7g,52268282,52268303,-	4507.41	4267.21
hsa-miR-92b-3p	762	27712	27712	4145.45	3924.54	1:hsa;hsa-mir-92b,155195237,155195258,+	4145.45	3924.54
hsa-miR-409-3p	355	26892	26892	4022.79	3808.41	14:hsa;hsa-mir-409,101065346,101065367,+	4022.79	3808.41
hsa-miR-26b-5p	192	26097	26095	3903.86	3695.82	2:hsa;hsa-mir-26b,218402657,218402677,+	3903.56	3695.54
hsa-miR-186-5p	200	25629	25629	3833.85	3629.55	1:hsa;hsa-mir-186,71067645,71067666,-	3833.85	3629.55
hsa-miR-199b-5p	194	22612	22598	3382.54	3202.28	9:hsa;hsa-mir-199b,128244746,128244768,-	3380.44	3200.3
hsa-miR-130a-3p	222	19048	19047.5	2849.4	2697.55	11:hsa;hsa-mir-130a,57641252,57641273,+	2849.32	2697.48
hsa-miR-381-3p	129	18542	18541.5	2773.71	2625.89	14:hsa;hsa-mir-381,101045968,101045989,+	2773.63	2625.82
hsa-let-7d-5p	151	18332	18019.2	2742.29	2596.15	9:hsa;hsa-let-7d,94178841,94178862,+	2695.49	2551.85
hsa-miR-25-3p	156	16509	16509	2469.59	2337.98	7:hsa;hsa-mir-25,100093611,100093632,-	2469.59	2337.98
hsa-miR-199a-5p	197	15350	7672.5	2296.21	2173.85	19:hsa;hsa-mir-199a-1,10817431,10817453,-	1147.73	1086.57
hsa-miR-199a-5p	196	15348	7670.5	2295.91	2173.56	1:hsa;hsa-mir-199a-2,172144565,172144587,-	1147.43	1086.29
hsa-miR-125a-5p	154	14091	14091	2107.88	1995.55	19:hsa;hsa-mir-125a,51693268,51693291,+	2107.88	1995.55
hsa-miR-423-5p	205	13821	13821	2067.49	1957.31	17:hsa;hsa-mir-423,30117095,30117117,+	2067.49	1957.31
hsa-miR-23a-3p	201	12934	12861	1934.8	1831.7	19:hsa;hsa-mir-23a,13836631,13836651,-	1923.88	1821.36
hsa-miR-155-5p	217	12468	12468	1865.09	1765.7	21:hsa;hsa-mir-155,25573983,25574006,+	1865.09	1765.7
hsa-miR-23b-3p	225	12028	11955	1799.27	1703.39	9:hsa;hsa-mir-23b,95085265,95085287,+	1788.35	1693.05
hsa-miR-423-3p	277	11528	11528	1724.48	1632.58	17:hsa;hsa-mir-423,30117131,30117153,+	1724.48	1632.58
hsa-let-7e-5p	185	11373	11197	1701.29	1610.63	19:hsa;hsa-let-7e,51692793,51692814,+	1674.97	1585.71
hsa-miR-101-3p	224	10420	5286.5	1558.73	1475.67	9:hsa;hsa-mir-101-2,4850345,4850365,+	790.81	748.667
hsa-miR-99b-5p	173	10369	10369	1551.1	1468.44	19:hsa;hsa-mir-99b,51692618,51692639,+	1551.1	1468.44
hsa-miR-101-3p	214	10273	5139.5	1536.74	1454.85	1:hsa;hsa-mir-101-1,65058480,65058500,-	768.82	727.849
hsa-miR-10b-5p	131	10225	10147.5	1529.56	1448.05	2:hsa;hsa-mir-10b,176150329,176150351,+	1517.97	1437.08
hsa-miR-181c-5p	117	10207	10207	1526.87	1445.5	19:hsa;hsa-mir-181c,13874725,13874746,+	1526.87	1445.5
hsa-miR-196a-5p	135	9611	7922.33	1437.71	1361.1	12:hsa;hsa-mir-196a-2,53991762,53991783,+	1185.11	1121.95
hsa-let-7c-5p	145	9464	9085.35	1415.72	1340.28	21:hsa;hsa-let-7c,16539838,16539859,+	1359.08	1286.66
hsa-miR-125b-1-3p	217	8979	8979	1343.17	1271.59	11:hsa;hsa-mir-125b-1,122099811,122099832,-	1343.17	1271.59
hsa-miR-196b-5p	159	8658	8656.33	1295.15	1226.13	7:hsa;hsa-mir-196b,27169494,27169515,-	1294.9	1225.9
hsa-miR-148b-3p	135	8432	8430.5	1261.35	1194.13	12:hsa;hsa-mir-148b,54337278,54337299,+	1261.12	1193.92
hsa-miR-152-3p	202	8118	8118	1214.38	1149.66	17:hsa;hsa-mir-152,48037214,48037234,-	1214.38	1149.66
hsa-miR-431-5p	73	7633	7633	1141.82	1080.98	14:hsa;hsa-mir-431,100881026,100881046,+	1141.82	1080.98
hsa-miR-21-3p	137	7609	7609	1138.23	1077.58	17:hsa;hsa-mir-21,59841311,59841331,+	1138.23	1077.58
hsa-miR-410-3p	62	7269	7269	1087.37	1029.43	14:hsa;hsa-mir-410,101065961,101065981,+	1087.37	1029.43
hsa-miR-493-5p	104	7248	7248	1084.23	1026.45	14:hsa;hsa-mir-493,100869075,100869096,+	1084.23	1026.45
hsa-miR-24-3p	141	6946	3506.5	1039.06	983.68	9:hsa;hsa-mir-24-1,95086064,95086085,+	524.539	496.586
hsa-miR-192-5p	141	6931	6931	1036.81	981.56	11:hsa;hsa-mir-192,64891160,64891180,-	1036.81	981.559
hsa-miR-24-3p	126	6879	3439.5	1029.03	974.2	19:hsa;hsa-mir-24-2,13836336,13836357,-	514.516	487.098
hsa-miR-98-5p	91	6733	6686.05	1007.19	953.52	X:hsa;hsa-mir-98,53556244,53556265,-	1000.17	946.87
hsa-miR-28-5p	68	6644	6644	993.88	940.91	3:hsa;hsa-mir-28,188688794,188688815,+	993.879	940.915
hsa-miR-136-3p	91	6614	6614	989.39	936.67	14:hsa;hsa-mir-136,100884750,100884771,+	989.391	936.666
hsa-miR-107	148	6161	3487.83	921.63	872.51	10:hsa;hsa-mir-107,89592796,89592818,-	521.747	493.942
hsa-miR-148a-3p	94	6139	6137.5	918.34	869.4	7:hsa;hsa-mir-148a,25949962,25949983,-	918.111	869.185
hsa-miR-301a-3p	65	6079	6079	909.36	860.9	17:hsa;hsa-mir-301a,59151186,59151208,-	909.36	860.9
hsa-miR-181a-2-3p	120	5531	5531	827.38	783.29	9:hsa;hsa-mir-181a-2,124692518,124692539,+	827.385	783.293
hsa-miR-320a-3p	281	5460	5125.15	816.76	773.24	8:hsa;hsa-mir-320a,22245007,22245028,-	766.673	725.816
hsa-miR-146b-5p	83	4914	4914	735.09	695.91	10:hsa;hsa-mir-146b,102436520,102436542,+	735.087	695.914
hsa-miR-769-5p	66	4818	4818	720.73	682.32	19:hsa;hsa-mir-769,46018961,46018982,+	720.727	682.319
hsa-miR-30c-5p	74	4804	2402.33	718.63	680.34	1:hsa;hsa-mir-30c-1,40757300,40757322,+	359.366	340.215
hsa-miR-30c-5p	73	4803	2401.33	718.48	680.19	6:hsa;hsa-mir-30c-2,71376966,71376988,-	359.217	340.074
hsa-miR-130b-3p	116	4300	4299.5	643.24	608.96	22:hsa;hsa-mir-130b,21653354,21653375,+	643.164	608.89
hsa-miR-34c-5p	53	4168	4168	623.49	590.27	11:hsa;hsa-mir-34c,111513451,111513473,+	623.493	590.267
hsa-miR-196a-5p	86	4123	2435.33	616.76	583.89	17:hsa;hsa-mir-196a-1,48632496,48632517,-	364.303	344.889
hsa-miR-132-3p	107	4050	4050	605.84	573.56	17:hsa;hsa-mir-132,2049966,2049987,-	605.841	573.556
hsa-miR-140-3p	156	3837	3837	573.98	543.39	16:hsa;hsa-mir-140,69933142,69933162,+	573.979	543.391
hsa-miR-93-5p	111	3761	3761	562.61	532.63	7:hsa;hsa-mir-93,100093778,100093800,-	562.61	532.628
hsa-miR-744-5p	62	3544	3544	530.15	501.9	17:hsa;hsa-mir-744,12081909,12081930,+	530.149	501.897
hsa-miR-30b-5p	44	3472	3471.33	519.38	491.7	8:hsa;hsa-mir-30b,134800536,134800557,-	519.278	491.606
hsa-miR-493-3p	76	3434	3434	513.69	486.32	14:hsa;hsa-mir-493,100869116,100869137,+	513.694	486.319
hsa-miR-128-3p	100	3166	1776.5	473.6	448.36	2:hsa;hsa-mir-128-1,135665446,135665466,+	265.747	251.586
hsa-miR-221-5p	82	3007	3007	449.82	425.85	X:hsa;hsa-mir-221,45746181,45746202,-	449.818	425.847
hsa-miR-15a-5p	56	3006	3006	449.67	425.71	13:hsa;hsa-mir-15a,50049132,50049153,-	449.669	425.706
hsa-miR-128-3p	85	2818	1428.5	421.55	399.08	3:hsa;hsa-mir-128-2,35744527,35744547,+	213.69	202.302
hsa-miR-224-5p	78	2755	2755	412.12	390.16	X:hsa;hsa-mir-224,151958584,151958608,-	412.122	390.16
hsa-miR-345-5p	68	2735	2735	409.13	387.33	14:hsa;hsa-mir-345,100307876,100307897,+	409.13	387.327
hsa-miR-455-5p	79	2663	2663	398.36	377.13	9:hsa;hsa-mir-455,114209449,114209470,+	398.359	377.131
hsa-miR-486-5p	132	2535	1333	379.21	359	8:hsa;hsa-mir-486-2,41660444,41660465,+	199.404	188.778
hsa-miR-15b-5p	42	2504	2504	374.57	354.61	3:hsa;hsa-mir-15b,160404607,160404628,+	374.574	354.613
hsa-miR-486-5p	118	2437	1235	364.55	345.12	8:hsa;hsa-mir-486-1,41660444,41660465,-	184.744	174.899
hsa-miR-19b-3p	37	2435	1226.83	364.25	344.84	X:hsa;hsa-mir-19b-2,134169732,134169754,-	183.523	173.743
hsa-miR-19b-3p	37	2419	1210.83	361.86	342.58	13:hsa;hsa-mir-19b-1,91351245,91351267,+	181.129	171.477
hsa-miR-27b-5p	48	2240	2240	335.08	317.23	9:hsa;hsa-mir-27b,95085463,95085484,+	335.083	317.226
hsa-miR-889-3p	40	2161	2161	323.26	306.04	14:hsa;hsa-mir-889,101047949,101047969,+	323.265	306.038
hsa-miR-425-5p	72	2107	2107	315.19	298.39	3:hsa;hsa-mir-425,49020161,49020183,-	315.187	298.391
hsa-miR-487b-3p	82	2076	2076	310.55	294	14:hsa;hsa-mir-487b,101046505,101046526,+	310.55	294
hsa-miR-99a-5p	55	2040	2002	305.16	288.9	21:hsa;hsa-mir-99a,16539101,16539122,+	299.48	283.521
hsa-miR-378a-3p	54	2033	2013.75	304.12	287.91	5:hsa;hsa-mir-378a,149732867,149732888,+	301.238	285.185
hsa-miR-340-5p	46	1997	1997	298.73	282.81	5:hsa;hsa-mir-340,180015318,180015339,-	298.732	282.813
hsa-miR-369-5p	27	1841	1841	275.4	260.72	14:hsa;hsa-mir-369,101065606,101065627,+	275.396	260.72
hsa-miR-182-5p	71	1811	1811	270.91	256.47	7:hsa;hsa-mir-182,129770405,129770428,-	270.908	256.471
hsa-miR-145-5p	58	1810	1810	270.76	256.33	5:hsa;hsa-mir-145,149430661,149430683,+	270.759	256.33
hsa-miR-181d-5p	73	1746	1742	261.18	247.27	19:hsa;hsa-mir-181d,13874910,13874932,+	260.587	246.7
hsa-miR-181a-3p	48	1669	1668	249.67	236.36	1:hsa;hsa-mir-181a-1,198859107,198859128,-	249.517	236.22
hsa-miR-218-5p	53	1594	814	238.45	225.74	4:hsa;hsa-mir-218-1,20528299,20528319,+	121.767	115.278
hsa-miR-134-5p	108	1570	1570	234.86	222.34	14:hsa;hsa-mir-134,101054694,101054715,+	234.857	222.341
hsa-miR-424-5p	38	1570	1570	234.86	222.34	X:hsa;hsa-mir-424,134546624,134546645,-	234.857	222.341
hsa-miR-218-5p	48	1562	782	233.66	221.21	5:hsa;hsa-mir-218-2,168768170,168768190,-	116.98	110.746
hsa-miR-30a-3p	63	1553	1552.5	232.31	219.93	6:hsa;hsa-mir-30a,71403597,71403618,-	232.239	219.863
hsa-miR-484	70	1553	1553	232.31	219.93	16:hsa;hsa-mir-484,15643301,15643322,+	232.314	219.934
hsa-miR-299-3p	51	1509	1509	225.73	213.7	14:hsa;hsa-mir-299,101023832,101023853,+	225.732	213.703
hsa-miR-30e-3p	47	1471	1471	220.05	208.32	1:hsa;hsa-mir-30e,40754413,40754434,+	220.048	208.321
hsa-miR-34a-5p	74	1328	1328	198.66	188.07	1:hsa;hsa-mir-34a,9151689,9151710,-	198.656	188.07
hsa-miR-424-3p	63	1312	1312	196.26	185.8	X:hsa;hsa-mir-424,134546661,134546681,-	196.263	185.804
hsa-miR-432-5p	124	1301	1301	194.62	184.25	14:hsa;hsa-mir-432,100884496,100884518,+	194.617	184.246
hsa-miR-181c-3p	46	1300	1299	194.47	184.1	19:hsa;hsa-mir-181c,13874763,13874784,+	194.318	183.963
hsa-miR-450b-5p	40	1244	1244	186.09	176.17	X:hsa;hsa-mir-450b,134540195,134540216,-	186.091	176.174
hsa-miR-106b-3p	84	1214	1214	181.6	171.93	7:hsa;hsa-mir-106b,100094044,100094065,-	181.603	171.925
hsa-miR-549a-5p	26	1211	1211	181.15	171.5	15:hsa;hsa-mir-549a,80842005,80842026,-	181.154	171.5
hsa-miR-574-3p	64	1198	1198	179.21	169.66	4:hsa;hsa-mir-574,38868092,38868113,+	179.209	169.659
hsa-miR-126-5p	26	1186	1186	177.41	167.96	9:hsa;hsa-mir-126,136670616,136670636,+	177.414	167.96
hsa-miR-454-3p	50	1141	1141	170.68	161.59	17:hsa;hsa-mir-454,59137821,59137843,-	170.683	161.587
hsa-miR-542-3p	70	1139	1139	170.38	161.3	X:hsa;hsa-mir-542,134541393,134541414,-	170.384	161.304
hsa-miR-370-3p	138	1118	1118	167.24	158.33	14:hsa;hsa-mir-370,100911186,100911207,+	167.242	158.33
hsa-miR-335-3p	52	1117	1117	167.09	158.19	7:hsa;hsa-mir-335,130496162,130496183,+	167.093	158.188
hsa-miR-887-3p	75	1111	1111	166.19	157.34	5:hsa;hsa-mir-887,15935229,15935250,+	166.195	157.338
hsa-miR-421	68	1084	1084	162.16	153.51	X:hsa;hsa-mir-421,74218424,74218446,-	162.156	153.515
hsa-miR-361-5p	54	1076	1076	160.96	152.38	X:hsa;hsa-mir-361,85903641,85903662,-	160.959	152.382
hsa-miR-136-5p	36	1074	1074	160.66	152.1	14:hsa;hsa-mir-136,100884716,100884738,+	160.66	152.098
hsa-miR-204-5p	32	1027	1027	153.63	145.44	9:hsa;hsa-mir-204,70810007,70810028,-	153.629	145.442
hsa-miR-214-5p	32	1023	1023	153.03	144.88	1:hsa;hsa-mir-214,172138827,172138848,-	153.031	144.876
hsa-miR-374a-3p	24	1016	1016	151.98	143.88	X:hsa;hsa-mir-374a,74287327,74287348,-	151.984	143.885
hsa-miR-151b	28	1002	550.5	149.89	141.9	14:hsa;hsa-mir-151b,100109478,100109495,-	82.3495	77.9611
hsa-miR-138-5p	43	994	516.5	148.69	140.77	3:hsa;hsa-mir-138-1,44114234,44114256,+	77.2635	73.1461
hsa-miR-532-5p	64	987	987	147.65	139.78	X:hsa;hsa-mir-532,50003167,50003188,+	147.646	139.778
hsa-miR-138-5p	37	972	494.5	145.4	137.65	16:hsa;hsa-mir-138-2,56858527,56858549,+	73.9725	70.0305
hsa-miR-125b-2-3p	56	957	957	143.16	135.53	21:hsa;hsa-mir-125b-2,16590290,16590311,+	143.158	135.529
hsa-miR-210-3p	98	954	954	142.71	135.1	11:hsa;hsa-mir-210,568154,568175,-	142.709	135.104
hsa-miR-584-5p	67	941	941	140.76	133.26	5:hsa;hsa-mir-584,149062328,149062349,-	140.765	133.263
hsa-miR-130b-5p	24	940	940	140.62	133.12	22:hsa;hsa-mir-130b,21653316,21653336,+	140.615	133.122
hsa-miR-339-3p	59	934	934	139.72	132.27	7:hsa;hsa-mir-339,1022982,1023004,-	139.717	132.272
hsa-miR-301b-3p	25	906	906	135.53	128.31	22:hsa;hsa-mir-301b,21653025,21653047,+	135.529	128.307
hsa-miR-450a-5p	39	903	453.5	135.08	127.88	X:hsa;hsa-mir-450a-1,134540358,134540379,-	67.8393	64.2241
hsa-miR-450a-5p	38	901	451.5	134.78	127.6	X:hsa;hsa-mir-450a-2,134540530,134540551,-	67.5401	63.9408
hsa-miR-193a-3p	25	899	899	134.48	127.32	17:hsa;hsa-mir-193a,31560050,31560071,+	134.482	127.315
hsa-miR-342-3p	51	851	851	127.3	120.52	14:hsa;hsa-mir-342,100109715,100109737,+	127.301	120.518
hsa-miR-214-3p	136	850	850	127.15	120.38	1:hsa;hsa-mir-214,172138868,172138889,-	127.152	120.376
hsa-miR-24-2-5p	45	849	849	127	120.23	19:hsa;hsa-mir-24-2,13836299,13836320,-	127.002	120.234
hsa-miR-654-5p	55	785	785	117.43	111.17	14:hsa;hsa-mir-654,101040234,101040255,+	117.428	111.171
hsa-miR-1185-1-3p	47	775	755.5	115.93	109.75	14:hsa;hsa-mir-1185-1,101043029,101043050,+	113.016	106.993
hsa-miR-1468-5p	29	767	767	114.74	108.62	X:hsa;hsa-mir-1468,63786014,63786034,-	114.736	108.622
hsa-miR-127-5p	72	765	765	114.44	108.34	14:hsa;hsa-mir-127,100883001,100883022,+	114.437	108.338
hsa-miR-758-3p	42	761	761	113.84	107.77	14:hsa;hsa-mir-758,101026071,101026092,+	113.838	107.772
hsa-miR-29c-3p	73	756	752.5	113.09	107.06	1:hsa;hsa-mir-29c,207801905,207801926,-	112.567	106.568
hsv1-miR-H6-3p	56	753	376.5	112.64	106.64	NC_001806;hsv1-mir-H6,118370,118390,-	56.3208	53.3194
hsv1-miR-H6-3p	56	753	376.5	112.64	106.64	NC_001806;hsv1-mir-H6,8025,8045,+	56.3208	53.3194
hsa-miR-376a-5p	24	742	742	111	105.08	14:hsa;hsa-mir-376a-1,101040788,101040809,+	110.996	105.081
hsa-miR-365a-3p	38	741	370.5	110.85	104.94	16:hsa;hsa-mir-365a,14309340,14309361,+	55.4233	52.4697
hsa-miR-365b-3p	38	741	370.5	110.85	104.94	17:hsa;hsa-mir-365b,31575478,31575499,+	55.4233	52.4697
hsa-miR-335-5p	19	726	726	108.6	102.82	7:hsa;hsa-mir-335,130496126,130496148,+	108.603	102.815
hsa-miR-145-3p	73	726	726	108.6	102.82	5:hsa;hsa-mir-145,149430699,149430720,+	108.603	102.815
hsa-miR-106b-5p	66	724	723.5	108.3	102.53	7:hsa;hsa-mir-106b,100094004,100094024,-	108.229	102.461
hsa-miR-10a-5p	46	699	616.5	104.56	98.99	17:hsa;hsa-mir-10a,48579859,48579881,-	92.2225	87.3079
hsa-miR-941	31	677	39.82	101.27	95.88	20:hsa;hsa-mir-941-2,63919802,63919824,+	5.95722	5.63976
hsa-miR-941	31	677	39.82	101.27	95.88	20:hsa;hsa-mir-941-3,63919607,63919629,+	5.95722	5.63976
hsa-miR-941	31	677	39.82	101.27	95.88	20:hsa;hsa-mir-941-5,63919802,63919824,+	5.95722	5.63976
hsa-miR-941	31	677	39.82	101.27	95.88	20:hsa;hsa-mir-941-1,63919495,63919517,+	5.95722	5.63976
hsa-miR-941	31	677	39.82	101.27	95.88	20:hsa;hsa-mir-941-2,63919914,63919936,+	5.95722	5.63976
hsa-miR-941	31	677	39.82	101.27	95.88	20:hsa;hsa-mir-941-3,63919914,63919936,+	5.95722	5.63976
hsa-miR-941	31	677	39.82	101.27	95.88	20:hsa;hsa-mir-941-5,63919551,63919573,+	5.95722	5.63976
hsa-miR-941	31	677	39.82	101.27	95.88	20:hsa;hsa-mir-941-2,63919607,63919629,+	5.95722	5.63976
hsa-miR-941	31	677	39.82	101.27	95.88	20:hsa;hsa-mir-941-2,63919551,63919573,+	5.95722	5.63976
hsa-miR-941	31	677	39.82	101.27	95.88	20:hsa;hsa-mir-941-4,63919914,63919936,+	5.95722	5.63976
hsa-miR-941	31	677	39.82	101.27	95.88	20:hsa;hsa-mir-941-4,63919607,63919629,+	5.95722	5.63976
hsa-miR-941	31	677	39.82	101.27	95.88	20:hsa;hsa-mir-941-3,63919551,63919573,+	5.95722	5.63976
hsa-miR-941	31	677	39.82	101.27	95.88	20:hsa;hsa-mir-941-3,63919802,63919824,+	5.95722	5.63976
hsa-miR-941	31	677	39.82	101.27	95.88	20:hsa;hsa-mir-941-4,63919802,63919824,+	5.95722	5.63976
hsa-miR-941	31	677	39.82	101.27	95.88	20:hsa;hsa-mir-941-5,63919607,63919629,+	5.95722	5.63976
hsa-miR-941	31	677	39.82	101.27	95.88	20:hsa;hsa-mir-941-5,63919914,63919936,+	5.95722	5.63976
hsa-miR-941	31	677	39.82	101.27	95.88	20:hsa;hsa-mir-941-4,63919551,63919573,+	5.95722	5.63976
hsa-miR-17-5p	38	667	664	99.78	94.46	13:hsa;hsa-mir-17,91350618,91350640,+	99.3281	94.0348
hsa-miR-382-5p	33	646	646	96.64	91.49	14:hsa;hsa-mir-382,101054316,101054337,+	96.6354	91.4857
hsa-miR-1307-5p	32	637	637	95.29	90.21	10:hsa;hsa-mir-1307,103394293,103394313,-	95.2891	90.2111
hsa-miR-411-3p	29	629	628.5	94.09	89.08	14:hsa;hsa-mir-411,101023375,101023396,+	94.0176	89.0074
hsa-miR-671-3p	74	619	619	92.6	87.66	7:hsa;hsa-mir-671,151238488,151238508,+	92.5965	87.662
hsa-miR-320b	58	607	216.15	90.8	85.96	1:hsa;hsa-mir-320b-2,224257080,224257101,-	32.3333	30.6102
hsa-miR-132-5p	27	605	605	90.5	85.68	17:hsa;hsa-mir-132,2049930,2049951,-	90.5022	85.6793
hsa-miR-376c-3p	43	602	602	90.05	85.25	14:hsa;hsa-mir-376c,101039732,101039752,+	90.0534	85.2545
hsa-miR-19a-3p	24	601	600.33	89.9	85.11	13:hsa;hsa-mir-19a,91350939,91350961,+	89.8041	85.0184
hsa-miR-320b	52	601	212.15	89.9	85.11	1:hsa;hsa-mir-320b-1,116671787,116671808,+	31.7349	30.0437
hsa-miR-660-5p	36	596	596	89.16	84.4	X:hsa;hsa-mir-660,50013256,50013277,+	89.1559	84.4047
hsa-miR-29b-3p	41	582	293.83	87.06	82.42	1:hsa;hsa-mir-29b-2,207802494,207802516,-	43.9547	41.6123
hsa-miR-29b-3p	40	578	289.83	86.46	81.86	7:hsa;hsa-mir-29b-1,130877509,130877531,-	43.3563	41.0458
hsa-miR-3615	46	574	574	85.86	81.29	17:hsa;hsa-mir-3615,74748663,74748683,+	85.8649	81.2891
hsa-miR-361-3p	43	563	563	84.22	79.73	X:hsa;hsa-mir-361,85903680,85903702,-	84.2194	79.7313
hsa-miR-1307-3p	59	560	560	83.77	79.31	10:hsa;hsa-mir-1307,103394332,103394353,-	83.7706	79.3065
hsa-miR-374a-5p	19	552	551.5	82.57	78.17	X:hsa;hsa-mir-374a,74287297,74287318,-	82.4991	78.1027
hsa-miR-212-3p	40	548	548	81.98	77.61	17:hsa;hsa-mir-212,2050341,2050361,-	81.9756	77.6071
hsa-miR-543	42	533	533	79.73	75.48	14:hsa;hsa-mir-543,101032033,101032054,+	79.7317	75.4828
hsa-miR-149-5p	38	524	524	78.39	74.21	2:hsa;hsa-mir-149,240456015,240456037,+	78.3854	74.2082
hsa-miR-369-3p	27	512	512	76.59	72.51	14:hsa;hsa-mir-369,101065641,101065661,+	76.5903	72.5088
hsa-miR-100-3p	22	512	512	76.59	72.51	11:hsa;hsa-mir-100,122152276,122152297,-	76.5903	72.5088
hsa-miR-539-3p	34	511	511	76.44	72.37	14:hsa;hsa-mir-539,101047369,101047390,+	76.4407	72.3672
hsa-miR-16-2-3p	31	509	509	76.14	72.08	3:hsa;hsa-mir-16-2,160404797,160404818,+	76.1415	72.0839
hsa-miR-148b-5p	26	497	497	74.35	70.38	12:hsa;hsa-mir-148b,54337240,54337261,+	74.3465	70.3845
hsa-miR-331-3p	44	485	485	72.55	68.69	12:hsa;hsa-mir-331,95308480,95308500,+	72.5514	68.6851
hsa-miR-494-3p	33	482	482	72.1	68.26	14:hsa;hsa-mir-494,101029681,101029702,+	72.1026	68.2602
hsa-miR-452-5p	39	479	479	71.65	67.84	X:hsa;hsa-mir-452,151959641,151959662,-	71.6538	67.8354
hsa-miR-337-3p	42	461	461	68.96	65.29	14:hsa;hsa-mir-337,100874553,100874574,+	68.9612	65.2862
hsa-miR-1304-3p	27	461	461	68.96	65.29	11:hsa;hsa-mir-1304,93733726,93733747,-	68.9612	65.2862
hsa-miR-500a-3p	36	443	378	66.27	62.74	X:hsa;hsa-mir-500a,50008482,50008503,+	56.5452	53.5319
hsv1-miR-H4-3p	32	439	219.5	65.67	62.17	NC_001806;hsv1-mir-H4,125930,125951,+	32.8351	31.0853
hsv1-miR-H4-3p	32	439	219.5	65.67	62.17	NC_001806;hsv1-mir-H4,470,491,-	32.8351	31.0853
hsa-miR-561-5p	19	428	428	64.02	60.61	2:hsa;hsa-mir-561,188297517,188297538,+	64.0247	60.6128
hsa-miR-99b-3p	53	418	418	62.53	59.2	19:hsa;hsa-mir-99b,51692656,51692677,+	62.5288	59.1966
hsa-miR-490-3p	44	408	408	61.03	57.78	7:hsa;hsa-mir-490,136903242,136903263,+	61.0329	57.7804
hsa-miR-487a-3p	8	407	407	60.88	57.64	14:hsa;hsa-mir-487a,101052494,101052515,+	60.8833	57.6388
hsa-miR-7706	21	370	370	55.35	52.4	15:hsa;hsa-mir-7706,85380639,85380662,+	55.3485	52.3989
hsa-miR-193b-3p	64	369	369	55.2	52.26	16:hsa;hsa-mir-193b,14304017,14304038,+	55.1989	52.2573
hsa-miR-485-5p	16	364	364	54.45	51.55	14:hsa;hsa-mir-485,101055427,101055448,+	54.4509	51.5492
hsa-miR-379-3p	21	359	358.5	53.7	50.84	14:hsa;hsa-mir-379,101022109,101022130,+	53.6282	50.7703
hsa-miR-1260b	3	344	192	51.46	48.72	11:hsa;hsa-mir-1260b,96341447,96341465,+	28.7214	27.1908
hsa-miR-374b-5p	13	341	340.5	51.01	48.29	X:hsa;hsa-mir-374b,74218557,74218578,-	50.9355	48.2212
hsa-miR-323a-3p	30	332	332	49.66	47.02	14:hsa;hsa-mir-323a,101025782,101025802,+	49.664	47.0174
hsa-miR-1260a	11	330	178	49.36	46.73	14:hsa;hsa-mir-1260a,77266231,77266248,+	26.6271	25.2081
hsa-miR-455-3p	45	311	311	46.52	44.04	9:hsa;hsa-mir-455,114209487,114209507,+	46.5226	44.0434
hsa-miR-668-3p	37	294	294	43.98	41.64	14:hsa;hsa-mir-668,101055300,101055322,+	43.9796	41.6359
hsa-miR-615-3p	39	285	285	42.63	40.36	12:hsa;hsa-mir-615,54034010,54034031,+	42.6333	40.3613
hsa-miR-20a-5p	25	279	279	41.74	39.51	13:hsa;hsa-mir-20a,91351072,91351094,+	41.7357	39.5116
hsa-miR-589-5p	15	278	278	41.59	39.37	7:hsa;hsa-mir-589,5495842,5495863,-	41.5861	39.37
hsa-miR-548k	9	275	275	41.14	38.95	11:hsa;hsa-mir-548k,70283986,70284007,+	41.1374	38.9451
hsa-miR-377-5p	12	270	270	40.39	38.24	14:hsa;hsa-mir-377,101062056,101062077,+	40.3894	38.2371
hsa-miR-222-5p	30	268	268	40.09	37.95	X:hsa;hsa-mir-222,45747045,45747066,-	40.0902	37.9538
hsa-miR-29a-5p	21	266	266	39.79	37.67	7:hsa;hsa-mir-29a,130876750,130876771,-	39.7911	37.6706
hsa-miR-143-5p	27	265	265	39.64	37.53	5:hsa;hsa-mir-143,149428944,149428965,+	39.6415	37.529
hsa-miR-1287-5p	12	265	265	39.64	37.53	10:hsa;hsa-mir-1287,98395233,98395254,-	39.6415	37.529
hsa-miR-30c-2-3p	18	261	261	39.04	36.96	6:hsa;hsa-mir-30c-2,71377006,71377027,-	39.0431	36.9625
hsa-miR-877-5p	53	260	260	38.89	36.82	6:hsa;hsa-mir-877,30584332,30584351,+	38.8935	36.8209
hsa-miR-431-3p	39	250	250	37.4	35.4	14:hsa;hsa-mir-431,100881069,100881090,+	37.3976	35.4047
hsa-miR-126-3p	29	248	248	37.1	35.12	9:hsa;hsa-mir-126,136670653,136670674,+	37.0984	35.1214
hsa-miR-30d-3p	27	248	247.5	37.1	35.12	8:hsa;hsa-mir-30d,134804921,134804942,-	37.0236	35.0506
hsa-miR-377-3p	28	240	240	35.9	33.99	14:hsa;hsa-mir-377,101062094,101062115,+	35.9017	33.9885
hsa-miR-454-5p	17	236	236	35.3	33.42	17:hsa;hsa-mir-454,59137781,59137802,-	35.3033	33.422
hsa-miR-140-5p	29	234	234	35	33.14	16:hsa;hsa-mir-140,69933103,69933124,+	35.0042	33.1388
hsa-miR-152-5p	15	221	221	33.06	31.3	17:hsa;hsa-mir-152,48037176,48037198,-	33.0595	31.2977
hsa-miR-22-5p	15	220	220	32.91	31.16	17:hsa;hsa-mir-22,1713917,1713938,-	32.9099	31.1561
hsa-miR-641	22	212	212	31.71	30.02	19:hsa;hsa-mir-641,40282558,40282581,-	31.7132	30.0232
hsa-miR-412-5p	9	206	206	30.82	29.17	14:hsa;hsa-mir-412,101065465,101065487,+	30.8156	29.1735
hsa-miR-503-5p	52	202	202	30.22	28.61	X:hsa;hsa-mir-503,134546333,134546355,-	30.2173	28.607
hsa-miR-154-5p	13	195	195	29.17	27.62	14:hsa;hsa-mir-154,101059769,101059790,+	29.1701	27.6156
hsa-miR-376a-3p	25	194	97	29.02	27.47	14:hsa;hsa-mir-376a-1,101040825,101040845,+	14.5103	13.737
hsa-miR-376a-3p	25	194	97	29.02	27.47	14:hsa;hsa-mir-376a-2,101040118,101040138,+	14.5103	13.737
hsa-miR-17-3p	22	190	190	28.42	26.91	13:hsa;hsa-mir-17,91350655,91350676,+	28.4222	26.9076
hsv1-miR-H2-3p	14	189	94.5	28.27	26.77	NC_001806;hsv1-mir-H2,121873,121896,+	14.1363	13.383
hsv1-miR-H2-3p	14	189	94.5	28.27	26.77	NC_001806;hsv1-mir-H2,4519,4542,-	14.1363	13.383
hsa-miR-26b-3p	16	187	187	27.97	26.48	2:hsa;hsa-mir-26b,218402692,218402712,+	27.9734	26.4827
hsa-miR-323b-3p	11	181	181	27.08	25.63	14:hsa;hsa-mir-323b,101056269,101056290,+	27.0759	25.633
hsa-miR-3117-3p	32	175	175	26.18	24.78	1:hsa;hsa-mir-3117,66628485,66628505,+	26.1783	24.7833
hsa-miR-708-3p	17	173	173	25.88	24.5	11:hsa;hsa-mir-708,79402078,79402099,-	25.8791	24.5
hsa-miR-330-5p	15	172	172	25.73	24.36	19:hsa;hsa-mir-330,45639011,45639032,-	25.7296	24.3584
hsa-miR-194-5p	12	171	94	25.58	24.22	11:hsa;hsa-mir-194-2,64891369,64891390,-	14.0615	13.3122
hsa-miR-549a-3p	20	170	170	25.43	24.08	15:hsa;hsa-mir-549a,80842038,80842058,-	25.4304	24.0752
hsa-miR-1296-5p	34	167	167	24.98	23.65	10:hsa;hsa-mir-1296,63372972,63372993,-	24.9816	23.6503
hsa-miR-708-5p	21	164	164	24.53	23.23	11:hsa;hsa-mir-708,79402032,79402054,-	24.5328	23.2255
hsa-miR-324-3p	44	164	164	24.53	23.23	17:hsa;hsa-mir-324,7223346,7223368,-	24.5328	23.2255
hsa-miR-194-5p	11	163	86	24.38	23.08	1:hsa;hsa-mir-194-1,220118171,220118192,-	12.8648	12.1792
hsa-miR-4775	8	163	163	24.38	23.08	2:hsa;hsa-mir-4775,207754816,207754837,+	24.3832	23.0838
hsa-let-7a-3p	23	157	79	23.49	22.23	9:hsa;hsa-let-7a-1,94176013,94176033,+	11.8176	11.1879
hsa-miR-1843	28	157	157	23.49	22.23	1:hsa;hsa-mir-1843,175968390,175968409,-	23.4857	22.2341
hsa-let-7a-3p	22	156	78	23.34	22.09	22:hsa;hsa-let-7a-3,46112800,46112820,+	11.6681	11.0463
hsa-miR-196a-3p	10	155	155	23.19	21.95	12:hsa;hsa-mir-196a-2,53991799,53991820,+	23.1865	21.9509
hsa-miR-3605-3p	27	154	154	23.04	21.81	1:hsa;hsa-mir-3605,33332458,33332480,-	23.0369	21.8093
hsa-miR-505-3p	26	153	153	22.89	21.67	X:hsa;hsa-mir-505,139924198,139924219,-	22.8873	21.6677
hsa-miR-195-5p	10	145	145	21.69	20.53	17:hsa;hsa-mir-195,7017629,7017649,-	21.6906	20.5347
hsa-miR-576-5p	7	142	142	21.24	20.11	4:hsa;hsa-mir-576,109488713,109488734,+	21.2418	20.1099
hsa-miR-665	32	142	142	21.24	20.11	14:hsa;hsa-mir-665,100875075,100875094,+	21.2418	20.1099
hsa-miR-502-3p	7	141	76	21.09	19.97	X:hsa;hsa-mir-502,50014649,50014670,+	11.3689	10.763
hsa-miR-3909	9	139	139	20.79	19.69	22:hsa;hsa-mir-3909,35335710,35335731,+	20.7931	19.685
hsa-miR-598-3p	24	137	137	20.49	19.4	8:hsa;hsa-mir-598,11035266,11035287,-	20.4939	19.4018
hsa-miR-138-1-3p	9	136	136	20.34	19.26	3:hsa;hsa-mir-138-1,44114274,44114295,+	20.3443	19.2601
hsa-miR-433-3p	20	136	136	20.34	19.26	14:hsa;hsa-mir-433,100881949,100881970,+	20.3443	19.2601
hsa-miR-153-3p	11	135	67.5	20.19	19.12	7:hsa;hsa-mir-153-2,157574388,157574409,-	10.0974	9.55926
hsa-miR-153-3p	11	135	67.5	20.19	19.12	2:hsa;hsa-mir-153-1,219294164,219294185,-	10.0974	9.55926
hsa-miR-628-5p	27	132	132	19.75	18.69	15:hsa;hsa-mir-628,55372962,55372983,-	19.7459	18.6937
hsa-miR-1185-2-3p	32	132	112.5	19.75	18.69	14:hsa;hsa-mir-1185-2,101044250,101044271,+	16.8289	15.9321
hsa-miR-34b-5p	13	130	130	19.45	18.41	11:hsa;hsa-mir-34b,111512950,111512972,+	19.4468	18.4104
hsa-miR-4677-3p	10	129	129	19.3	18.27	1:hsa;hsa-mir-4677,243346225,243346246,+	19.2972	18.2688
hsa-miR-7977	12	127	127	19	17.99	3:hsa;hsa-mir-7977,176515103,176515120,+	18.998	17.9856
hsa-miR-212-5p	14	127	127	19	17.99	17:hsa;hsa-mir-212,2050301,2050323,-	18.998	17.9856
hsa-miR-215-5p	18	125	125	18.7	17.7	1:hsa;hsa-mir-215,220117879,220117899,-	18.6988	17.7023
hsa-miR-18a-5p	16	125	119	18.7	17.7	13:hsa;hsa-mir-18a,91350756,91350778,+	17.8013	16.8526
hsa-miR-12136	4	124	62	18.55	17.56	1:hsa;hsa-mir-12136,632615,632632,-	9.27461	8.78036
hsa-miR-12136	4	124	62	18.55	17.56	MT:hsa;hsa-mir-12136,7444,7461,-	9.27461	8.78036
hsa-miR-146a-5p	28	123	123	18.4	17.42	5:hsa;hsa-mir-146a,160485372,160485393,+	18.3996	17.4191
hsa-miR-625-5p	9	121	121	18.1	17.14	14:hsa;hsa-mir-625,65471116,65471136,+	18.1004	17.1359
hsa-miR-328-3p	28	121	121	18.1	17.14	16:hsa;hsa-mir-328,67202368,67202389,-	18.1004	17.1359
hsa-miR-874-3p	21	121	121	18.1	17.14	5:hsa;hsa-mir-874,137647618,137647639,-	18.1004	17.1359
hsa-miR-548o-3p	10	115	57.33	17.2	16.29	20:hsa;hsa-mir-548o-2,38516607,38516628,+	8.57652	8.11947
hsa-miR-30c-1-3p	10	115	115	17.2	16.29	1:hsa;hsa-mir-30c-1,40757339,40757360,+	17.2029	16.2862
hsa-miR-548o-3p	10	115	57.33	17.2	16.29	7:hsa;hsa-mir-548o,102405828,102405849,-	8.57652	8.11947
hsa-miR-542-5p	15	114	114	17.05	16.14	X:hsa;hsa-mir-542,134541356,134541378,-	17.0533	16.1445
hsa-miR-485-3p	22	114	114	17.05	16.14	14:hsa;hsa-mir-485,101055464,101055485,+	17.0533	16.1445
hsa-miR-495-3p	17	111	111	16.6	15.72	14:hsa;hsa-mir-495,101033804,101033825,+	16.6045	15.7197
hsa-miR-191-3p	18	110	110	16.45	15.58	3:hsa;hsa-mir-191,49020675,49020696,-	16.4549	15.5781
hsa-miR-1180-3p	15	110	110	16.45	15.58	17:hsa;hsa-mir-1180,19344546,19344567,-	16.4549	15.5781
hsa-let-7f-2-3p	6	109	109	16.31	15.44	X:hsa;hsa-let-7f-2,53557249,53557270,-	16.3054	15.4364
hsa-miR-590-3p	10	109	109	16.31	15.44	7:hsa;hsa-mir-590,74191253,74191273,+	16.3054	15.4364
hsa-miR-382-3p	10	107	107	16.01	15.15	14:hsa;hsa-mir-382,101054352,101054372,+	16.0062	15.1532
hsa-miR-93-3p	23	106	106	15.86	15.01	7:hsa;hsa-mir-93,100093817,100093838,-	15.8566	15.0116
hsa-miR-3158-3p	17	104	52	15.56	14.73	10:hsa;hsa-mir-3158-2,101601466,101601487,-	7.7787	7.36417
hsa-miR-3158-3p	17	104	52	15.56	14.73	10:hsa;hsa-mir-3158-1,101601466,101601487,+	7.7787	7.36417
hsa-miR-409-5p	11	101	101	15.11	14.3	14:hsa;hsa-mir-409,101065314,101065336,+	15.1086	14.3035
hsa-miR-2355-5p	23	100	100	14.96	14.16	2:hsa;hsa-mir-2355,207109997,207110017,-	14.959	14.1619
hsa-miR-942-5p	16	100	100	14.96	14.16	1:hsa;hsa-mir-942,117094655,117094676,+	14.959	14.1619
hsa-miR-652-3p	16	99	99	14.81	14.02	X:hsa;hsa-mir-652,110055389,110055409,+	14.8095	14.0203
hsa-miR-1185-5p	8	98	49	14.66	13.88	14:hsa;hsa-mir-1185-1,101042991,101043011,+	7.32993	6.93932
hsa-miR-1185-5p	8	98	49	14.66	13.88	14:hsa;hsa-mir-1185-2,101044212,101044232,+	7.32993	6.93932
hsa-miR-339-5p	11	97	97	14.51	13.74	7:hsa;hsa-mir-339,1022947,1022969,-	14.5103	13.737
hsa-miR-183-5p	14	97	97	14.51	13.74	7:hsa;hsa-mir-183,129774931,129774952,-	14.5103	13.737
hsa-miR-9985	8	96	46.83	14.36	13.6	Y:hsa;hsa-mir-9985,4606140,4606158,+	7.00582	6.63248
hsa-miR-376b-3p	9	95	95	14.21	13.45	14:hsa;hsa-mir-376b,101040497,101040518,+	14.2111	13.4538
hsa-miR-425-3p	17	94	94	14.06	13.31	3:hsa;hsa-mir-425,49020202,49020223,-	14.0615	13.3122
hsa-miR-3661	21	92	92	13.76	13.03	5:hsa;hsa-mir-3661,134225777,134225798,+	13.7623	13.0289
hsa-miR-1197	2	88	88	13.16	12.46	14:hsa;hsa-mir-1197,101025620,101025640,+	13.164	12.4624
hsa-miR-380-3p	2	87	87	13.01	12.32	14:hsa;hsa-mir-380,101025056,101025077,+	13.0144	12.3208
hsa-miR-589-3p	17	85	85	12.72	12.04	7:hsa;hsa-mir-589,5495879,5495902,-	12.7152	12.0376
hsa-miR-340-3p	12	85	85	12.72	12.04	5:hsa;hsa-mir-340,180015360,180015381,-	12.7152	12.0376
hsa-miR-4746-5p	12	83	83	12.42	11.75	19:hsa;hsa-mir-4746,4445987,4446009,+	12.416	11.7544
hsa-miR-190a-5p	10	77	77	11.52	10.9	15:hsa;hsa-mir-190a,62823971,62823992,+	11.5185	10.9046
hsa-let-7e-3p	9	76	76	11.37	10.76	19:hsa;hsa-let-7e,51692838,51692859,+	11.3689	10.763
hsa-miR-146b-3p	12	76	76	11.37	10.76	10:hsa;hsa-mir-146b,102436557,102436578,+	11.3689	10.763
hsa-miR-27a-5p	12	75	75	11.22	10.62	19:hsa;hsa-mir-27a,13836449,13836470,-	11.2193	10.6214
hsa-miR-329-3p	40	74	37	11.07	10.48	14:hsa;hsa-mir-329-2,101027151,101027172,+	5.53485	5.23989
hsa-miR-329-3p	40	74	37	11.07	10.48	14:hsa;hsa-mir-329-1,101026834,101026855,+	5.53485	5.23989
hsa-miR-299-5p	12	72	72	10.77	10.2	14:hsa;hsa-mir-299,101023800,101023821,+	10.7705	10.1965
hsa-miR-671-5p	23	72	72	10.77	10.2	7:hsa;hsa-mir-671,151238449,151238471,+	10.7705	10.1965
hsa-miR-125a-3p	15	72	72	10.77	10.2	19:hsa;hsa-mir-125a,51693306,51693327,+	10.7705	10.1965
hsa-let-7i-3p	9	72	72	10.77	10.2	12:hsa;hsa-let-7i,62603747,62603768,+	10.7705	10.1965
hsa-miR-548e-3p	20	69	69	10.32	9.77	10:hsa;hsa-mir-548e,110988978,110988999,+	10.3217	9.77169
hsa-miR-1301-3p	30	69	69	10.32	9.77	2:hsa;hsa-mir-1301,25328687,25328710,-	10.3217	9.77169
hsa-miR-99a-3p	11	69	69	10.32	9.77	21:hsa;hsa-mir-99a,16539138,16539159,+	10.3217	9.77169
hsa-miR-497-5p	6	68	68	10.17	9.63	17:hsa;hsa-mir-497,7017934,7017954,-	10.1722	9.63007
hsa-miR-656-3p	11	68	68	10.17	9.63	14:hsa;hsa-mir-656,101066766,101066786,+	10.1722	9.63007
hsa-miR-1271-5p	11	67	67	10.02	9.49	5:hsa;hsa-mir-1271,176367960,176367981,+	10.0226	9.48845
hsa-miR-337-5p	11	65	65	9.72	9.21	14:hsa;hsa-mir-337,100874515,100874535,+	9.72338	9.20522
hsa-miR-324-5p	15	65	65	9.72	9.21	17:hsa;hsa-mir-324,7223312,7223333,-	9.72338	9.20522
hsa-miR-627-5p	6	64	64	9.57	9.06	15:hsa;hsa-mir-627,42199585,42199606,-	9.57379	9.0636
hsa-miR-25-5p	6	64	64	9.57	9.06	7:hsa;hsa-mir-25,100093573,100093593,-	9.57379	9.0636
hsv1-miR-H26	20	63	63	9.42	8.92	NC_001806;hsv1-mir-H26,92943,92962,+	9.4242	8.92198
hsa-miR-4435	15	62	15.5	9.27	8.78	2:hsa;hsa-mir-4435-1,87629764,87629785,+	2.31865	2.19509
hsa-miR-4435	15	62	15.5	9.27	8.78	2:hsa;hsa-mir-4435-2,111321017,111321038,-	2.31865	2.19509
hsa-miR-4435	15	62	15.5	9.27	8.78	2:hsa;hsa-mir-4435-2,87629764,87629785,+	2.31865	2.19509
hsa-miR-4435	15	62	15.5	9.27	8.78	2:hsa;hsa-mir-4435-1,111321021,111321042,-	2.31865	2.19509
hsa-miR-766-3p	10	62	62	9.27	8.78	X:hsa;hsa-mir-766,119646802,119646823,-	9.27461	8.78036
hsa-miR-379-5p	13	61	61	9.13	8.64	14:hsa;hsa-mir-379,101022071,101022091,+	9.12502	8.63874
hsa-miR-4326	11	61	61	9.13	8.64	20:hsa;hsa-mir-4326,63286818,63286837,+	9.12502	8.63874
hsa-let-7b-3p	8	60	60	8.98	8.5	22:hsa;hsa-let-7b,46113745,46113766,+	8.97543	8.49712
hsa-miR-365b-5p	22	60	60	8.98	8.5	17:hsa;hsa-mir-365b,31575439,31575460,+	8.97543	8.49712
hsa-miR-7974	4	58	58	8.68	8.21	19:hsa;hsa-mir-7974,11495599,11495622,-	8.67625	8.21389
hsa-miR-2277-5p	17	58	58	8.68	8.21	5:hsa;hsa-mir-2277,93620713,93620736,-	8.67625	8.21389
hsa-miR-374b-3p	11	58	58	8.68	8.21	X:hsa;hsa-mir-374b,74218587,74218608,-	8.67625	8.21389
hsa-miR-185-3p	15	58	58	8.68	8.21	22:hsa;hsa-mir-185,20033188,20033209,+	8.67625	8.21389
hsa-miR-33b-5p	6	58	58	8.68	8.21	17:hsa;hsa-mir-33b,17813851,17813870,-	8.67625	8.21389
hsa-miR-296-3p	26	56	56	8.38	7.93	20:hsa;hsa-mir-296,58817662,58817683,-	8.37706	7.93065
hsa-miR-3912-3p	15	54	54	8.08	7.65	5:hsa;hsa-mir-3912,171386718,171386738,-	8.07788	7.64741
hsa-miR-148a-5p	6	54	54	8.08	7.65	7:hsa;hsa-mir-148a,25949924,25949945,-	8.07788	7.64741
hsa-miR-330-3p	25	54	54	8.08	7.65	19:hsa;hsa-mir-330,45639050,45639072,-	8.07788	7.64741
hsa-miR-224-3p	18	54	54	8.08	7.65	X:hsa;hsa-mir-224,151958630,151958652,-	8.07788	7.64741
hsa-miR-31-3p	12	52	52	7.78	7.36	9:hsa;hsa-mir-31,21512158,21512179,-	7.7787	7.36417
hsa-miR-3605-5p	17	52	52	7.78	7.36	1:hsa;hsa-mir-3605,33332414,33332436,-	7.7787	7.36417
hsa-miR-32-5p	5	50	50	7.48	7.08	9:hsa;hsa-mir-32,109046234,109046255,-	7.47952	7.08094
hsa-let-7f-1-3p	5	48	48	7.18	6.8	9:hsa;hsa-let-7f-1,94176409,94176430,+	7.18034	6.7977
hsa-miR-29c-5p	11	48	48	7.18	6.8	1:hsa;hsa-mir-29c,207801867,207801888,-	7.18034	6.7977
hsa-miR-29b-1-5p	10	47	47	7.03	6.66	7:hsa;hsa-mir-29b-1,130877468,130877491,-	7.03075	6.65608
hsa-miR-486-3p	8	47	23.5	7.03	6.66	8:hsa;hsa-mir-486-2,41660486,41660506,+	3.51538	3.32804
hsa-miR-501-3p	6	47	47	7.03	6.66	X:hsa;hsa-mir-501,50009772,50009793,+	7.03075	6.65608
hsa-miR-486-3p	8	47	23.5	7.03	6.66	8:hsa;hsa-mir-486-1,41660486,41660506,-	3.51538	3.32804
hsa-miR-433-5p	5	46	46	6.88	6.51	14:hsa;hsa-mir-433,100881897,100881918,+	6.88116	6.51446
hsa-miR-659-5p	9	45	45	6.73	6.37	22:hsa;hsa-mir-659,37847699,37847720,-	6.73157	6.37284
hsa-miR-10399-3p	13	45	45	6.73	6.37	7:hsa;hsa-mir-10399,139044137,139044157,-	6.73157	6.37284
hsa-miR-15b-3p	7	44	44	6.58	6.23	3:hsa;hsa-mir-15b,160404645,160404666,+	6.58198	6.23122
hsa-miR-887-5p	15	43	43	6.43	6.09	5:hsa;hsa-mir-887,15935191,15935211,+	6.43239	6.0896
hsa-miR-101-5p	8	43	43	6.43	6.09	1:hsa;hsa-mir-101-1,65058444,65058465,-	6.43239	6.0896
hsa-miR-4521	16	41	41	6.13	5.81	17:hsa;hsa-mir-4521,8186948,8186969,+	6.13321	5.80637
hsa-miR-34a-3p	13	41	41	6.13	5.81	1:hsa;hsa-mir-34a,9151731,9151752,-	6.13321	5.80637
hsa-miR-616-5p	4	41	41	6.13	5.81	12:hsa;hsa-mir-616,57519178,57519199,-	6.13321	5.80637
hsa-miR-496	7	41	41	6.13	5.81	14:hsa;hsa-mir-496,101060628,101060649,+	6.13321	5.80637
hsa-miR-7-1-3p	12	40	40	5.98	5.66	9:hsa;hsa-mir-7-1,83969813,83969834,-	5.98362	5.66475
hsa-miR-378c	8	40	20.75	5.98	5.66	10:hsa;hsa-mir-378c,130962598,130962622,-	3.104	2.93859
hsa-miR-874-5p	11	40	40	5.98	5.66	5:hsa;hsa-mir-874,137647581,137647603,-	5.98362	5.66475
hsa-miR-664a-3p	8	39	39	5.83	5.52	1:hsa;hsa-mir-664a,220200586,220200608,-	5.83403	5.52313
hsa-miR-758-5p	17	39	39	5.83	5.52	14:hsa;hsa-mir-758,101026034,101026055,+	5.83403	5.52313
hsa-miR-331-5p	15	39	39	5.83	5.52	12:hsa;hsa-mir-331,95308445,95308466,+	5.83403	5.52313
hsa-miR-320c	18	39	11.31	5.83	5.52	18:hsa;hsa-mir-320c-2,24321716,24321735,+	1.69215	1.60198
hsa-miR-370-5p	14	39	39	5.83	5.52	14:hsa;hsa-mir-370,100911151,100911172,+	5.83403	5.52313
hsa-miR-548e-5p	8	38	38	5.68	5.38	10:hsa;hsa-mir-548e,110988940,110988961,+	5.68444	5.38151
hsa-miR-137-3p	17	38	38	5.68	5.38	1:hsa;hsa-mir-137,98046128,98046150,-	5.68444	5.38151
hsa-miR-375-3p	3	38	38	5.68	5.38	2:hsa;hsa-mir-375,219001684,219001705,-	5.68444	5.38151
hsa-miR-539-5p	12	38	38	5.68	5.38	14:hsa;hsa-mir-539,101047329,101047350,+	5.68444	5.38151
hsa-miR-5699-5p	14	38	38	5.68	5.38	10:hsa;hsa-mir-5699,641698,641719,-	5.68444	5.38151
hsa-miR-181b-2-3p	20	37	37	5.53	5.24	9:hsa;hsa-mir-181b-2,124693763,124693782,+	5.53485	5.23989
hsa-miR-6500-3p	6	37	37	5.53	5.24	1:hsa;hsa-mir-6500,51060072,51060092,+	5.53485	5.23989
hsa-miR-5000-3p	5	36	36	5.39	5.1	2:hsa;hsa-mir-5000,75090873,75090894,+	5.38526	5.09827
hsa-miR-3126-5p	9	35	35	5.24	4.96	2:hsa;hsa-mir-3126,69103691,69103712,+	5.23567	4.95665
hsa-miR-219a-1-3p	12	35	35	5.24	4.96	6:hsa;hsa-mir-219a-1,33207896,33207917,+	5.23567	4.95665
hsa-miR-128-1-5p	5	35	35	5.24	4.96	2:hsa;hsa-mir-128-1,135665411,135665433,+	5.23567	4.95665
hsa-miR-550a-3p	12	34	11.33	5.09	4.82	7:hsa;hsa-mir-550a-3,29680793,29680814,-	1.69536	1.60501
hsa-miR-550a-3p	12	34	11.33	5.09	4.82	7:hsa;hsa-mir-550a-2,32733041,32733062,+	1.69536	1.60501
hsa-miR-550a-3p	12	34	11.33	5.09	4.82	7:hsa;hsa-mir-550a-1,30289854,30289875,+	1.69536	1.60501
hsa-miR-320c	13	34	7.73	5.09	4.82	18:hsa;hsa-mir-320c-1,21683559,21683578,+	1.15612	1.09451
hsa-miR-320d	16	34	18.93	5.09	4.82	13:hsa;hsa-mir-320d-1,40727857,40727875,-	2.83153	2.68064
hsa-miR-532-3p	8	34	34	5.09	4.82	X:hsa;hsa-mir-532,50003204,50003225,+	5.08608	4.81504
hsa-let-7d-3p	6	34	34	5.09	4.82	9:hsa;hsa-let-7d,94178895,94178916,+	5.08608	4.81504
hsa-miR-188-5p	8	32	32	4.79	4.53	X:hsa;hsa-mir-188,50003517,50003537,+	4.78689	4.5318
hsa-miR-34c-3p	10	32	32	4.79	4.53	11:hsa;hsa-mir-34c,111513484,111513505,+	4.78689	4.5318
hsa-miR-24-1-5p	12	31	31	4.64	4.39	9:hsa;hsa-mir-24-1,95086027,95086048,+	4.6373	4.39018
hsa-miR-200b-3p	8	31	31	4.64	4.39	1:hsa;hsa-mir-200b,1167160,1167181,+	4.6373	4.39018
hsv1-miR-H1-5p	7	30	15	4.49	4.25	NC_001806;hsv1-mir-H1,7986,8006,-	2.24386	2.12428
hsv1-miR-H1-5p	7	30	15	4.49	4.25	NC_001806;hsv1-mir-H1,118331,118351,+	2.24386	2.12428
hsa-miR-9903	8	30	30	4.49	4.25	8:hsa;hsa-mir-9903,98393695,98393716,-	4.48771	4.24856
hsa-miR-193a-5p	5	29	29	4.34	4.11	17:hsa;hsa-mir-193a,31560016,31560037,+	4.33812	4.10694
hsa-miR-376a-2-5p	5	29	29	4.34	4.11	14:hsa;hsa-mir-376a-2,101040080,101040100,+	4.33812	4.10694
hsa-miR-937-3p	15	28	28	4.19	3.97	8:hsa;hsa-mir-937,143813007,143813028,-	4.18853	3.96532
hsa-miR-10399-5p	6	28	28	4.19	3.97	7:hsa;hsa-mir-10399,139044100,139044120,-	4.18853	3.96532
hsa-miR-362-5p	6	27	27	4.04	3.82	X:hsa;hsa-mir-362,50008968,50008991,+	4.03894	3.82371
hsa-miR-550a-5p	11	27	13.33	4.04	3.82	7:hsa;hsa-mir-550a-2,32733002,32733024,+	1.99454	1.88825
hsa-miR-550a-5p	11	27	13.33	4.04	3.82	7:hsa;hsa-mir-550a-1,30289815,30289837,+	1.99454	1.88825
hsa-miR-6852-5p	15	27	27	4.04	3.82	9:hsa;hsa-mir-6852,35710681,35710701,-	4.03894	3.82371
hsa-miR-18a-3p	6	26	26	3.89	3.68	13:hsa;hsa-mir-18a,91350797,91350819,+	3.88935	3.68209
hsa-miR-181b-3p	15	26	26	3.89	3.68	1:hsa;hsa-mir-181b-1,198858948,198858968,-	3.88935	3.68209
hsa-miR-2682-5p	5	25	25	3.74	3.54	1:hsa;hsa-mir-2682,98045264,98045286,-	3.73976	3.54047
hsa-miR-3129-5p	8	25	25	3.74	3.54	2:hsa;hsa-mir-3129,189133044,189133065,-	3.73976	3.54047
hsa-miR-3174	11	25	25	3.74	3.54	15:hsa;hsa-mir-3174,90006764,90006786,+	3.73976	3.54047
hsa-miR-185-5p	7	25	25	3.74	3.54	22:hsa;hsa-mir-185,20033153,20033174,+	3.73976	3.54047
hsa-miR-2467-5p	6	25	25	3.74	3.54	2:hsa;hsa-mir-2467,239351735,239351757,-	3.73976	3.54047
hsa-miR-218-1-3p	14	25	25	3.74	3.54	4:hsa;hsa-mir-218-1,20528342,20528363,+	3.73976	3.54047
hsa-miR-3913-5p	13	24	12	3.59	3.4	12:hsa;hsa-mir-3913-1,69584744,69584765,-	1.79509	1.69942
hsa-miR-320d	11	24	8.1	3.59	3.4	X:hsa;hsa-mir-320d-2,140926201,140926219,-	1.21097	1.14644
hsa-miR-154-3p	8	24	24	3.59	3.4	14:hsa;hsa-mir-154,101059805,101059826,+	3.59017	3.39885
hsa-miR-134-3p	9	24	24	3.59	3.4	14:hsa;hsa-mir-134,101054732,101054754,+	3.59017	3.39885
hsv1-miR-H12	12	24	12	3.59	3.4	NC_001806;hsv1-mir-H12,132012,132033,-	1.79509	1.69942
hsv1-miR-H12	12	24	12	3.59	3.4	NC_001806;hsv1-mir-H12,146202,146223,+	1.79509	1.69942
hsa-miR-4636	8	24	24	3.59	3.4	5:hsa;hsa-mir-4636,9053825,9053846,-	3.59017	3.39885
hsa-miR-618	5	24	24	3.59	3.4	12:hsa;hsa-mir-618,80935751,80935773,-	3.59017	3.39885
hsa-miR-3913-5p	13	24	12	3.59	3.4	12:hsa;hsa-mir-3913-2,69584744,69584765,+	1.79509	1.69942
hsa-miR-3677-3p	3	24	24	3.59	3.4	16:hsa;hsa-mir-3677,2270751,2270772,+	3.59017	3.39885
hsa-miR-6716-3p	10	23	23	3.44	3.26	11:hsa;hsa-mir-6716,118644048,118644069,+	3.44058	3.25723
hsa-miR-3176	13	23	23	3.44	3.26	16:hsa;hsa-mir-3176,543336,543354,+	3.44058	3.25723
hsa-miR-33a-5p	4	23	23	3.44	3.26	22:hsa;hsa-mir-33a,41900949,41900969,+	3.44058	3.25723
hsa-miR-744-3p	4	23	23	3.44	3.26	17:hsa;hsa-mir-744,12081966,12081987,+	3.44058	3.25723
hsa-miR-342-5p	13	21	21	3.14	2.97	14:hsa;hsa-mir-342,100109673,100109693,+	3.1414	2.97399
hsa-miR-580-3p	5	21	21	3.14	2.97	5:hsa;hsa-mir-580,36147952,36147973,-	3.1414	2.97399
hsa-miR-1255a	5	21	21	3.14	2.97	4:hsa;hsa-mir-1255a,101330329,101330351,-	3.1414	2.97399
hsa-miR-9-5p	8	21	7	3.14	2.97	5:hsa;hsa-mir-9-2,88666868,88666890,-	1.04713	0.991331
hsv1-miR-H4-5p	9	21	10.5	3.14	2.97	NC_001806;hsv1-mir-H4,125885,125906,+	1.5707	1.487
hsa-miR-34b-3p	8	21	21	3.14	2.97	11:hsa;hsa-mir-34b,111512987,111513008,+	3.1414	2.97399
hsa-miR-582-3p	9	21	21	3.14	2.97	5:hsa;hsa-mir-582,59703658,59703679,-	3.1414	2.97399
hsa-miR-4454	5	21	21	3.14	2.97	4:hsa;hsa-mir-4454,163093576,163093595,-	3.1414	2.97399
hsa-miR-627-3p	6	21	21	3.14	2.97	15:hsa;hsa-mir-627,42199624,42199643,-	3.1414	2.97399
hsv1-miR-H4-5p	9	21	10.5	3.14	2.97	NC_001806;hsv1-mir-H4,425,446,-	1.5707	1.487
hsa-miR-9-5p	8	21	7	3.14	2.97	15:hsa;hsa-mir-9-3,89368032,89368054,+	1.04713	0.991331
hsa-miR-9-5p	8	21	7	3.14	2.97	1:hsa;hsa-mir-9-1,156420356,156420378,-	1.04713	0.991331
hsa-miR-329-5p	8	20	10	2.99	2.83	14:hsa;hsa-mir-329-2,101027114,101027136,+	1.4959	1.41619
hsa-miR-628-3p	11	20	20	2.99	2.83	15:hsa;hsa-mir-628,55373000,55373020,-	2.99181	2.83237
hsa-miR-329-5p	8	20	10	2.99	2.83	14:hsa;hsa-mir-329-1,101026797,101026819,+	1.4959	1.41619
hsa-miR-3129-3p	6	19	19	2.84	2.69	2:hsa;hsa-mir-3129,189133082,189133103,-	2.84222	2.69076
hsa-miR-3928-3p	9	18	18	2.69	2.55	22:hsa;hsa-mir-3928,31160098,31160119,-	2.69263	2.54914
hsa-miR-770-5p	5	18	18	2.69	2.55	14:hsa;hsa-mir-770,100852409,100852431,+	2.69263	2.54914
hsv1-miR-H16	5	18	18	2.69	2.55	NC_001806;hsv1-mir-H16,69042,69063,+	2.69263	2.54914
hsa-miR-1228-3p	7	18	18	2.69	2.55	12:hsa;hsa-mir-1228,57194555,57194574,+	2.69263	2.54914
hsa-miR-625-3p	11	17	17	2.54	2.41	14:hsa;hsa-mir-625,65471153,65471174,+	2.54304	2.40752
hsa-miR-193b-5p	7	17	17	2.54	2.41	16:hsa;hsa-mir-193b,14303980,14304001,+	2.54304	2.40752
hsv1-miR-H2-5p	4	17	8.5	2.54	2.41	NC_001806;hsv1-mir-H2,121834,121855,+	1.27152	1.20376
hsa-miR-2116-3p	9	17	17	2.54	2.41	15:hsa;hsa-mir-2116,59171233,59171253,-	2.54304	2.40752
hsa-miR-940	5	17	17	2.54	2.41	16:hsa;hsa-mir-940,2271806,2271826,+	2.54304	2.40752
hsa-miR-655-3p	5	17	17	2.54	2.41	14:hsa;hsa-mir-655,101049610,101049631,+	2.54304	2.40752
hsa-let-7g-3p	6	17	17	2.54	2.41	3:hsa;hsa-let-7g,52268339,52268359,-	2.54304	2.40752
hsv1-miR-H2-5p	4	17	8.5	2.54	2.41	NC_001806;hsv1-mir-H2,4480,4501,-	1.27152	1.20376
hsa-miR-10401-3p	7	16	2	2.39	2.27	GL000220.1:hsa;hsa-mir-10401,150006,150026,+	0.299181	0.283237
hsa-miR-10401-3p	7	16	2	2.39	2.27	GL000220.1:hsa;hsa-mir-10401,106034,106054,+	0.299181	0.283237
hsa-miR-541-5p	6	16	16	2.39	2.27	14:hsa;hsa-mir-541,101064504,101064528,+	2.39345	2.2659
hsa-miR-10401-3p	7	16	2	2.39	2.27	KI270733.1:hsa;hsa-mir-10401,122883,122903,+	0.299181	0.283237
hsa-miR-33a-3p	4	16	16	2.39	2.27	22:hsa;hsa-mir-33a,41900989,41901010,+	2.39345	2.2659
hsa-miR-4466	3	16	16	2.39	2.27	6:hsa;hsa-mir-4466,156779682,156779699,-	2.39345	2.2659
hsa-miR-98-3p	5	16	16	2.39	2.27	X:hsa;hsa-mir-98,53556302,53556323,-	2.39345	2.2659
hsa-miR-1276	5	16	16	2.39	2.27	15:hsa;hsa-mir-1276,85770507,85770526,-	2.39345	2.2659
hsa-miR-142-5p	5	16	16	2.39	2.27	17:hsa;hsa-mir-142,58331247,58331267,-	2.39345	2.2659
hsa-miR-10401-3p	7	16	2	2.39	2.27	21:hsa;hsa-mir-10401,8250807,8250827,+	0.299181	0.283237
hsa-miR-381-5p	4	16	16	2.39	2.27	14:hsa;hsa-mir-381,101045927,101045948,+	2.39345	2.2659
hsa-miR-10401-3p	7	16	2	2.39	2.27	21:hsa;hsa-mir-10401,8206598,8206618,+	0.299181	0.283237
hsa-miR-10401-3p	7	16	2	2.39	2.27	KI270733.1:hsa;hsa-mir-10401,167966,167986,+	0.299181	0.283237
hsa-miR-4662a-5p	2	16	16	2.39	2.27	8:hsa;hsa-mir-4662a,124821990,124822011,+	2.39345	2.2659
hsa-miR-10401-3p	7	16	2	2.39	2.27	21:hsa;hsa-mir-10401,8389645,8389665,+	0.299181	0.283237
hsa-miR-10401-3p	7	16	2	2.39	2.27	21:hsa;hsa-mir-10401,8433832,8433852,+	0.299181	0.283237
hsa-miR-450a-2-3p	8	15	15	2.24	2.12	X:hsa;hsa-mir-450a-2,134540565,134540586,-	2.24386	2.12428
hsa-miR-129-5p	5	15	8	2.24	2.12	11:hsa;hsa-mir-129-2,43581408,43581428,+	1.19672	1.13295
hsa-miR-129-5p	5	15	8	2.24	2.12	7:hsa;hsa-mir-129-1,128207876,128207896,+	1.19672	1.13295
hsa-miR-3167	5	15	15	2.24	2.12	11:hsa;hsa-mir-3167,126988511,126988532,-	2.24386	2.12428
hsa-miR-4768-5p	3	15	15	2.24	2.12	X:hsa;hsa-mir-4768,17425889,17425910,+	2.24386	2.12428
hsa-miR-548n	4	14	14	2.09	1.98	7:hsa;hsa-mir-548n,34940769,34940790,-	2.09427	1.98266
hsv1-miR-H6-5p	6	14	7	2.09	1.98	NC_001806;hsv1-mir-H6,118330,118350,-	1.04713	0.991331
hsa-miR-501-5p	4	14	14	2.09	1.98	X:hsa;hsa-mir-501,50009735,50009756,+	2.09427	1.98266
hsa-let-7a-2-3p	7	14	14	2.09	1.98	11:hsa;hsa-let-7a-2,122146571,122146592,-	2.09427	1.98266
hsa-miR-3622a-5p	7	14	14	2.09	1.98	8:hsa;hsa-mir-3622a,27701690,27701711,+	2.09427	1.98266
hsv1-miR-H6-5p	6	14	7	2.09	1.98	NC_001806;hsv1-mir-H6,7985,8005,+	1.04713	0.991331
hsa-miR-210-5p	2	13	13	1.94	1.84	11:hsa;hsa-mir-210,568116,568137,-	1.94468	1.84104
hsa-miR-32-3p	4	13	13	1.94	1.84	9:hsa;hsa-mir-32,109046275,109046296,-	1.94468	1.84104
hsa-miR-2355-3p	7	13	13	1.94	1.84	2:hsa;hsa-mir-2355,207110040,207110061,-	1.94468	1.84104
hsa-miR-664a-5p	7	13	13	1.94	1.84	1:hsa;hsa-mir-664a,220200548,220200571,-	1.94468	1.84104
hsa-miR-548al	6	13	13	1.94	1.84	11:hsa;hsa-mir-548al,74399301,74399322,+	1.94468	1.84104
hsa-miR-1304-5p	6	13	13	1.94	1.84	11:hsa;hsa-mir-1304,93733693,93733714,-	1.94468	1.84104
hsa-miR-133a-3p	3	13	6.5	1.94	1.84	18:hsa;hsa-mir-133a-1,21825750,21825771,-	0.972338	0.920522
hsa-miR-7705	7	13	13	1.94	1.84	8:hsa;hsa-mir-7705,100702968,100702990,-	1.94468	1.84104
hsa-miR-133a-3p	3	13	6.5	1.94	1.84	20:hsa;hsa-mir-133a-2,62564970,62564991,+	0.972338	0.920522
hsa-miR-29b-2-5p	4	13	13	1.94	1.84	1:hsa;hsa-mir-29b-2,207802453,207802474,-	1.94468	1.84104
hsa-miR-197-3p	3	13	13	1.94	1.84	1:hsa;hsa-mir-197,109598940,109598961,+	1.94468	1.84104
hsa-miR-12135	3	12	12	1.8	1.7	15:hsa;hsa-mir-12135,73299962,73299979,+	1.79509	1.69942
hsa-miR-4661-5p	6	12	12	1.8	1.7	8:hsa;hsa-mir-4661,91205494,91205515,+	1.79509	1.69942
hsa-miR-18b-5p	6	12	6	1.8	1.7	X:hsa;hsa-mir-18b,134170046,134170068,-	0.897543	0.849712
hsa-miR-6866-5p	4	12	12	1.8	1.7	17:hsa;hsa-mir-6866,40161938,40161960,+	1.79509	1.69942
hsa-miR-3200-3p	4	12	12	1.8	1.7	22:hsa;hsa-mir-3200,30731610,30731631,+	1.79509	1.69942
hsa-miR-190a-3p	2	12	12	1.8	1.7	15:hsa;hsa-mir-190a,62824008,62824028,+	1.79509	1.69942
hsa-miR-500a-5p	6	12	8	1.8	1.7	X:hsa;hsa-mir-500a,50008443,50008465,+	1.19672	1.13295
hsa-miR-7976	5	11	11	1.65	1.56	3:hsa;hsa-mir-7976,127587111,127587129,-	1.64549	1.55781
hsa-miR-4473	8	11	11	1.65	1.56	9:hsa;hsa-mir-4473,20411204,20411225,-	1.64549	1.55781
hsa-miR-1245a	8	11	11	1.65	1.56	2:hsa;hsa-mir-1245a,188978136,188978156,+	1.64549	1.55781
hsa-miR-769-3p	4	11	11	1.65	1.56	19:hsa;hsa-mir-769,46019000,46019022,+	1.64549	1.55781
hsa-miR-6840-5p	5	11	11	1.65	1.56	7:hsa;hsa-mir-6840,100356656,100356679,+	1.64549	1.55781
hsa-miR-4421	5	11	11	1.65	1.56	1:hsa;hsa-mir-4421,51059879,51059900,+	1.64549	1.55781
hsa-miR-3934-5p	7	10	10	1.5	1.42	6:hsa;hsa-mir-3934,33698152,33698173,+	1.4959	1.41619
hsa-miR-651-5p	3	10	10	1.5	1.42	X:hsa;hsa-mir-651,8126980,8127001,+	1.4959	1.41619
hsa-miR-4762-5p	5	10	10	1.5	1.42	22:hsa;hsa-mir-4762,45760532,45760552,+	1.4959	1.41619
hsa-miR-153-5p	2	10	10	1.5	1.42	7:hsa;hsa-mir-153-2,157574350,157574371,-	1.4959	1.41619
hsa-miR-487a-5p	4	10	10	1.5	1.42	14:hsa;hsa-mir-487a,101052458,101052479,+	1.4959	1.41619
hsa-miR-4645-3p	7	10	10	1.5	1.42	6:hsa;hsa-mir-4645,2854077,2854098,-	1.4959	1.41619
hsa-miR-5002-5p	7	10	10	1.5	1.42	3:hsa;hsa-mir-5002,124132949,124132972,+	1.4959	1.41619
hsa-miR-548ab	2	10	10	1.5	1.42	3:hsa;hsa-mir-548ab,103524043,103524064,-	1.4959	1.41619
hsa-miR-96-5p	1	10	10	1.5	1.42	7:hsa;hsa-mir-96,129774700,129774722,-	1.4959	1.41619
hsa-miR-483-3p	6	10	10	1.5	1.42	11:hsa;hsa-mir-483,2134181,2134201,-	1.4959	1.41619
hsa-miR-6818-5p	2	10	10	1.5	1.42	22:hsa;hsa-mir-6818,30007054,30007075,+	1.4959	1.41619
hsa-miR-2110	6	10	10	1.5	1.42	10:hsa;hsa-mir-2110,114174112,114174133,-	1.4959	1.41619
hsa-miR-6720-3p	4	10	10	1.5	1.42	6:hsa;hsa-mir-6720,1390380,1390401,-	1.4959	1.41619
hsa-miR-326	4	10	10	1.5	1.42	11:hsa;hsa-mir-326,75335151,75335170,-	1.4959	1.41619
hsa-miR-5010-3p	4	10	10	1.5	1.42	17:hsa;hsa-mir-5010,42514267,42514288,+	1.4959	1.41619
hsa-miR-30b-3p	2	10	10	1.5	1.42	8:hsa;hsa-mir-30b,134800574,134800595,-	1.4959	1.41619
hsa-miR-7-5p	5	9	3	1.35	1.27	19:hsa;hsa-mir-7-3,4770700,4770723,+	0.448771	0.424856
hsa-miR-195-3p	6	9	9	1.35	1.27	17:hsa;hsa-mir-195,7017667,7017688,-	1.34631	1.27457
hsa-miR-20a-3p	3	9	9	1.35	1.27	13:hsa;hsa-mir-20a,91351108,91351129,+	1.34631	1.27457
hsa-miR-6770-3p	4	9	1	1.35	1.27	16:hsa;hsa-mir-6770-2,14930859,14930879,+	0.14959	0.141619
hsa-miR-6770-3p	4	9	1	1.35	1.27	16:hsa;hsa-mir-6770-1,14930859,14930879,+	0.14959	0.141619
hsa-miR-7-5p	5	9	3	1.35	1.27	9:hsa;hsa-mir-7-1,83969771,83969794,-	0.448771	0.424856
hsa-miR-6770-3p	4	9	1	1.35	1.27	16:hsa;hsa-mir-6770-3,16329344,16329364,+	0.14959	0.141619
hsa-miR-3651	4	9	9	1.35	1.27	9:hsa;hsa-mir-3651,92292521,92292544,-	1.34631	1.27457
hsa-miR-6514-5p	5	9	9	1.35	1.27	11:hsa;hsa-mir-6514,62792702,62792724,-	1.34631	1.27457
hsv1-miR-H1-3p	5	9	4.5	1.35	1.27	NC_001806;hsv1-mir-H1,8024,8046,-	0.673157	0.637284
hsa-miR-6770-3p	4	9	1	1.35	1.27	16:hsa;hsa-mir-6770-3,14930859,14930879,+	0.14959	0.141619
hsa-miR-320e	9	9	8.5	1.35	1.27	19:hsa;hsa-mir-320e,46709325,46709342,-	1.27152	1.20376
hsa-miR-3613-5p	3	9	9	1.35	1.27	13:hsa;hsa-mir-3613,49996430,49996451,-	1.34631	1.27457
hsa-miR-296-5p	5	9	9	1.35	1.27	20:hsa;hsa-mir-296,58817628,58817648,-	1.34631	1.27457
hsa-miR-6770-3p	4	9	1	1.35	1.27	16:hsa;hsa-mir-6770-2,18379390,18379410,-	0.14959	0.141619
hsa-miR-6770-3p	4	9	1	1.35	1.27	16:hsa;hsa-mir-6770-3,18379390,18379410,-	0.14959	0.141619
hsa-miR-6770-3p	4	9	1	1.35	1.27	16:hsa;hsa-mir-6770-2,16329344,16329364,+	0.14959	0.141619
hsa-miR-505-5p	4	9	9	1.35	1.27	X:hsa;hsa-mir-505,139924162,139924183,-	1.34631	1.27457
hsa-miR-1294	3	9	9	1.35	1.27	5:hsa;hsa-mir-1294,154347153,154347174,+	1.34631	1.27457
hsv1-miR-H1-3p	5	9	4.5	1.35	1.27	NC_001806;hsv1-mir-H1,118369,118391,+	0.673157	0.637284
hsa-miR-3159	3	9	9	1.35	1.27	11:hsa;hsa-mir-3159,18387796,18387817,+	1.34631	1.27457
hsa-miR-548l	3	9	9	1.35	1.27	11:hsa;hsa-mir-548l,94466509,94466530,-	1.34631	1.27457
hsa-miR-6770-3p	4	9	1	1.35	1.27	16:hsa;hsa-mir-6770-1,16329344,16329364,+	0.14959	0.141619
hsa-miR-7-5p	5	9	3	1.35	1.27	15:hsa;hsa-mir-7-2,88611856,88611879,+	0.448771	0.424856
hsa-miR-6770-3p	4	9	1	1.35	1.27	16:hsa;hsa-mir-6770-1,18379390,18379410,-	0.14959	0.141619
hsa-miR-33b-3p	2	9	9	1.35	1.27	17:hsa;hsa-mir-33b,17813889,17813910,-	1.34631	1.27457
hsa-miR-1270	7	9	9	1.35	1.27	19:hsa;hsa-mir-1270,20399284,20399306,-	1.34631	1.27457
hsa-miR-579-5p	5	9	9	1.35	1.27	5:hsa;hsa-mir-579,32394402,32394423,-	1.34631	1.27457
hsa-miR-23c	8	8	6	1.2	1.13	X:hsa;hsa-mir-23c,20017153,20017174,-	0.897543	0.849712
hsa-miR-494-5p	5	8	8	1.2	1.13	14:hsa;hsa-mir-494,101029648,101029670,+	1.19672	1.13295
hsa-miR-378d	5	8	2.25	1.2	1.13	8:hsa;hsa-mir-378d-2,93916043,93916062,-	0.336578	0.318642
hsa-miR-432-3p	2	8	8	1.2	1.13	14:hsa;hsa-mir-432,100884544,100884564,+	1.19672	1.13295
hsa-miR-616-3p	6	8	8	1.2	1.13	12:hsa;hsa-mir-616,57519218,57519239,-	1.19672	1.13295
hsa-miR-615-5p	5	8	8	1.2	1.13	12:hsa;hsa-mir-615,54033967,54033988,+	1.19672	1.13295
hsa-miR-378d	5	8	2.25	1.2	1.13	4:hsa;hsa-mir-378d-1,5923305,5923324,-	0.336578	0.318642
hsa-miR-545-5p	4	8	8	1.2	1.13	X:hsa;hsa-mir-545,74287128,74287149,-	1.19672	1.13295
hsa-miR-1910-5p	2	8	8	1.2	1.13	16:hsa;hsa-mir-1910,85741632,85741652,-	1.19672	1.13295
hsa-miR-889-5p	3	8	8	1.2	1.13	14:hsa;hsa-mir-889,101047911,101047932,+	1.19672	1.13295
hsa-miR-1305	2	8	8	1.2	1.13	4:hsa;hsa-mir-1305,182169343,182169364,+	1.19672	1.13295
hsa-miR-500b-5p	4	8	4	1.2	1.13	X:hsa;hsa-mir-500b,50010682,50010699,+	0.598362	0.566475
hsa-miR-5100	1	8	8	1.2	1.13	10:hsa;hsa-mir-5100,42997630,42997651,+	1.19672	1.13295
hsa-miR-3065-5p	7	8	8	1.2	1.13	17:hsa;hsa-mir-3065,81125886,81125908,+	1.19672	1.13295
hsa-miR-548s	5	8	7.33	1.2	1.13	2:hsa;hsa-mir-548s,11767495,11767517,+	1.097	1.03854
hsa-miR-629-5p	4	7	7	1.05	0.99	15:hsa;hsa-mir-629,70079393,70079413,-	1.04713	0.991331
hsa-miR-5001-3p	6	7	7	1.05	0.99	2:hsa;hsa-mir-5001,232550533,232550554,-	1.04713	0.991331
hsa-miR-92b-5p	3	7	7	1.05	0.99	1:hsa;hsa-mir-92b,155195196,155195217,+	1.04713	0.991331
hsa-miR-1295a	4	7	7	1.05	0.99	1:hsa;hsa-mir-1295a,171101776,171101796,-	1.04713	0.991331
hsa-miR-3691-5p	6	7	7	1.05	0.99	6:hsa;hsa-mir-3691,5148247,5148269,-	1.04713	0.991331
hsa-miR-499a-5p	4	7	7	1.05	0.99	20:hsa;hsa-mir-499a,34990408,34990428,+	1.04713	0.991331
hsa-miR-2116-5p	4	7	7	1.05	0.99	15:hsa;hsa-mir-2116,59171196,59171216,-	1.04713	0.991331
hsa-miR-548u	3	7	7	1.05	0.99	6:hsa;hsa-mir-548u,57390180,57390202,+	1.04713	0.991331
hsa-miR-655-5p	2	7	7	1.05	0.99	14:hsa;hsa-mir-655,101049572,101049593,+	1.04713	0.991331
hsa-miR-103a-2-5p	2	7	7	1.05	0.99	20:hsa;hsa-mir-103a-2,3917504,3917526,+	1.04713	0.991331
hsa-miR-147b-3p	4	7	7	1.05	0.99	15:hsa;hsa-mir-147b,45433098,45433118,+	1.04713	0.991331
hsa-miR-1245b-3p	6	7	7	1.05	0.99	2:hsa;hsa-mir-1245b,188978134,188978155,-	1.04713	0.991331
hsa-miR-6840-3p	3	7	7	1.05	0.99	7:hsa;hsa-mir-6840,100356696,100356717,+	1.04713	0.991331
hsa-miR-106a-5p	3	7	3.5	1.05	0.99	X:hsa;hsa-mir-106a,134170210,134170232,-	0.523567	0.495665
hsa-miR-624-5p	2	7	7	1.05	0.99	14:hsa;hsa-mir-624,31014661,31014682,-	1.04713	0.991331
hsa-miR-301a-5p	4	7	7	1.05	0.99	17:hsa;hsa-mir-301a,59151149,59151170,-	1.04713	0.991331
hsa-miR-3065-3p	6	7	7	1.05	0.99	17:hsa;hsa-mir-3065,81125926,81125948,+	1.04713	0.991331
hsa-miR-5699-3p	5	7	7	1.05	0.99	10:hsa;hsa-mir-5699,641747,641768,-	1.04713	0.991331
hsa-miR-362-3p	3	6	6	0.9	0.85	X:hsa;hsa-mir-362,50009005,50009026,+	0.897543	0.849712
hsa-miR-3160-3p	4	6	3	0.9	0.85	11:hsa;hsa-mir-3160-1,46451858,46451879,-	0.448771	0.424856
hsa-miR-6511a-5p	6	6	0.3	0.9	0.85	16:hsa;hsa-mir-6511a-2,16368880,16368902,+	0.0448771	0.0424856
hsa-miR-188-3p	1	6	6	0.9	0.85	X:hsa;hsa-mir-188,50003556,50003576,+	0.897543	0.849712
hsa-miR-10527-5p	2	6	6	0.9	0.85	12:hsa;hsa-mir-10527,63823663,63823685,+	0.897543	0.849712
hsa-miR-6511a-5p	6	6	0.3	0.9	0.85	16:hsa;hsa-mir-6511a-2,14925941,14925963,+	0.0448771	0.0424856
hsa-miR-6511a-5p	6	6	0.3	0.9	0.85	16:hsa;hsa-mir-6511a-3,16324592,16324614,+	0.0448771	0.0424856
hsa-miR-6511b-5p	6	6	0.3	0.9	0.85	16:hsa;hsa-mir-6511b-1,2106679,2106702,-	0.0448771	0.0424856
hsa-miR-3130-5p	4	6	3.5	0.9	0.85	2:hsa;hsa-mir-3130-1,206783246,206783266,-	0.523567	0.495665
hsa-miR-6511b-5p	6	6	0.3	0.9	0.85	16:hsa;hsa-mir-6511b-2,2106683,2106706,-	0.0448771	0.0424856
hsa-miR-190b-5p	3	6	6	0.9	0.85	1:hsa;hsa-mir-190b,154193675,154193696,-	0.897543	0.849712
hsa-miR-3942-5p	2	6	6	0.9	0.85	15:hsa;hsa-mir-3942,35372278,35372299,-	0.897543	0.849712
hsa-miR-6511a-5p	6	6	0.3	0.9	0.85	16:hsa;hsa-mir-6511a-4,18344017,18344039,-	0.0448771	0.0424856
hsa-miR-6511a-5p	6	6	0.3	0.9	0.85	16:hsa;hsa-mir-6511a-4,16368880,16368902,+	0.0448771	0.0424856
hsa-miR-6511b-5p	6	6	0.3	0.9	0.85	16:hsa;hsa-mir-6511b-2,15134080,15134103,-	0.0448771	0.0424856
hsa-miR-6511a-5p	6	6	0.3	0.9	0.85	16:hsa;hsa-mir-6511a-3,14925941,14925963,+	0.0448771	0.0424856
hsa-miR-1267	2	6	6	0.9	0.85	13:hsa;hsa-mir-1267,107531182,107531202,-	0.897543	0.849712
hsa-miR-6511a-5p	6	6	0.3	0.9	0.85	16:hsa;hsa-mir-6511a-2,18344017,18344039,-	0.0448771	0.0424856
hsa-miR-6511a-5p	6	6	0.3	0.9	0.85	16:hsa;hsa-mir-6511a-4,16324592,16324614,+	0.0448771	0.0424856
hsa-miR-376c-5p	3	6	3	0.9	0.85	14:hsa;hsa-mir-376c,101039694,101039714,+	0.448771	0.424856
hsa-miR-6511a-5p	6	6	0.3	0.9	0.85	16:hsa;hsa-mir-6511a-1,16324592,16324614,+	0.0448771	0.0424856
hsa-miR-4766-3p	5	6	6	0.9	0.85	22:hsa;hsa-mir-4766,40813928,40813948,-	0.897543	0.849712
hsa-miR-483-5p	4	6	6	0.9	0.85	11:hsa;hsa-mir-483,2134141,2134162,-	0.897543	0.849712
hsa-miR-6511a-5p	6	6	0.3	0.9	0.85	16:hsa;hsa-mir-6511a-1,16368880,16368902,+	0.0448771	0.0424856
hsa-miR-6511b-5p	6	6	0.3	0.9	0.85	16:hsa;hsa-mir-6511b-1,15134076,15134099,-	0.0448771	0.0424856
hsa-miR-582-5p	3	6	6	0.9	0.85	5:hsa;hsa-mir-582,59703621,59703643,-	0.897543	0.849712
hsa-miR-3935	6	6	6	0.9	0.85	16:hsa;hsa-mir-3935,56245577,56245598,+	0.897543	0.849712
hsa-miR-6515-5p	1	6	6	0.9	0.85	19:hsa;hsa-mir-6515,12940486,12940506,+	0.897543	0.849712
hsa-miR-4785	3	6	6	0.9	0.85	2:hsa;hsa-mir-4785,160407853,160407873,-	0.897543	0.849712
hsv1-miR-H3-3p	4	6	3	0.9	0.85	NC_001806;hsv1-mir-H3,125778,125798,+	0.448771	0.424856
hsa-miR-548j-5p	4	6	5.5	0.9	0.85	22:hsa;hsa-mir-548j,26555240,26555261,-	0.822747	0.778903
hsa-miR-6511a-5p	6	6	0.3	0.9	0.85	16:hsa;hsa-mir-6511a-3,16368880,16368902,+	0.0448771	0.0424856
hsa-miR-643	2	6	6	0.9	0.85	19:hsa;hsa-mir-643,52281857,52281878,+	0.897543	0.849712
hsa-miR-6511a-5p	6	6	0.3	0.9	0.85	16:hsa;hsa-mir-6511a-2,16324592,16324614,+	0.0448771	0.0424856
hsa-miR-376b-5p	3	6	3	0.9	0.85	14:hsa;hsa-mir-376b,101040459,101040480,+	0.448771	0.424856
hsa-miR-548at-5p	2	6	6	0.9	0.85	17:hsa;hsa-mir-548at,42494773,42494794,+	0.897543	0.849712
hsa-miR-6511a-5p	6	6	0.3	0.9	0.85	16:hsa;hsa-mir-6511a-1,14925941,14925963,+	0.0448771	0.0424856
hsa-miR-3160-3p	4	6	3	0.9	0.85	11:hsa;hsa-mir-3160-2,46451858,46451879,+	0.448771	0.424856
hsa-miR-6511a-5p	6	6	0.3	0.9	0.85	16:hsa;hsa-mir-6511a-3,18344017,18344039,-	0.0448771	0.0424856
hsa-miR-6511a-5p	6	6	0.3	0.9	0.85	16:hsa;hsa-mir-6511a-4,14925941,14925963,+	0.0448771	0.0424856
hsa-miR-6511a-5p	6	6	0.3	0.9	0.85	16:hsa;hsa-mir-6511a-1,18344017,18344039,-	0.0448771	0.0424856
hsa-miR-4742-3p	4	6	6	0.9	0.85	1:hsa;hsa-mir-4742,224398289,224398311,-	0.897543	0.849712
hsv1-miR-H3-3p	4	6	3	0.9	0.85	NC_001806;hsv1-mir-H3,614,634,-	0.448771	0.424856
hsa-miR-6859-5p	3	5	0.31	0.75	0.71	1:hsa;hsa-mir-6859-4,17374,17396,-	0.046747	0.0442558
hsa-miR-6859-5p	3	5	0.31	0.75	0.71	1:hsa;hsa-mir-6859-2,17374,17396,-	0.046747	0.0442558
hsv1-miR-H5-5p	1	5	2.5	0.75	0.71	NC_001806;hsv1-mir-H5,151408,151429,-	0.373976	0.354047
hsv1-miR-H5-3p	4	5	2.5	0.75	0.71	NC_001806;hsv1-mir-H5,151450,151471,-	0.373976	0.354047
hsa-miR-6859-5p	3	5	0.31	0.75	0.71	16:hsa;hsa-mir-6859-2,17057,17079,-	0.046747	0.0442558
hsa-miR-6511b-3p	3	5	1.5	0.75	0.71	16:hsa;hsa-mir-6511b-1,2106721,2106743,-	0.224386	0.212428
hsa-miR-323a-5p	2	5	5	0.75	0.71	14:hsa;hsa-mir-323a,101025747,101025768,+	0.747952	0.708094
hsa-miR-6859-5p	3	5	0.31	0.75	0.71	16:hsa;hsa-mir-6859-1,17057,17079,-	0.046747	0.0442558
hsa-miR-6882-5p	4	5	5	0.75	0.71	15:hsa;hsa-mir-6882,74840647,74840668,-	0.747952	0.708094
hsa-miR-4761-3p	2	5	5	0.75	0.71	22:hsa;hsa-mir-4761,19963814,19963834,+	0.747952	0.708094
hsa-miR-6859-5p	3	5	0.31	0.75	0.71	1:hsa;hsa-mir-6859-3,17374,17396,-	0.046747	0.0442558
hsa-miR-3138	5	5	5	0.75	0.71	4:hsa;hsa-mir-3138,10078658,10078681,-	0.747952	0.708094
hsv1-miR-H5-5p	1	5	2.5	0.75	0.71	NC_001806;hsv1-mir-H5,126730,126751,+	0.373976	0.354047
hsv1-miR-H5-3p	4	5	2.5	0.75	0.71	NC_001806;hsv1-mir-H5,126772,126793,+	0.373976	0.354047
hsa-miR-610	1	5	5	0.75	0.71	11:hsa;hsa-mir-610,28056830,28056850,+	0.747952	0.708094
hsa-miR-6859-5p	3	5	0.31	0.75	0.71	15:hsa;hsa-mir-6859-4,101973529,101973551,+	0.046747	0.0442558
hsa-miR-6859-5p	3	5	0.31	0.75	0.71	1:hsa;hsa-mir-6859-1,17374,17396,-	0.046747	0.0442558
hsa-miR-6859-5p	3	5	0.31	0.75	0.71	15:hsa;hsa-mir-6859-2,101973529,101973551,+	0.046747	0.0442558
hsa-miR-1262	5	5	5	0.75	0.71	1:hsa;hsa-mir-1262,68183531,68183552,-	0.747952	0.708094
hsa-miR-219b-3p	3	5	5	0.75	0.71	9:hsa;hsa-mir-219b,128392676,128392698,+	0.747952	0.708094
hsa-miR-203a-3p	4	5	5	0.75	0.71	14:hsa;hsa-mir-203a,104117469,104117490,+	0.747952	0.708094
hsa-miR-1275	2	5	5	0.75	0.71	6:hsa;hsa-mir-1275,33999989,34000005,-	0.747952	0.708094
hsa-miR-3613-3p	2	5	5	0.75	0.71	13:hsa;hsa-mir-3613,49996467,49996490,-	0.747952	0.708094
hsa-miR-6859-5p	3	5	0.31	0.75	0.71	16:hsa;hsa-mir-6859-3,17057,17079,-	0.046747	0.0442558
hsa-miR-6859-5p	3	5	0.31	0.75	0.71	16:hsa;hsa-mir-6859-4,17057,17079,-	0.046747	0.0442558
hsa-miR-556-5p	2	5	5	0.75	0.71	1:hsa;hsa-mir-556,162342561,162342582,+	0.747952	0.708094
hsa-miR-6859-5p	3	5	0.31	0.75	0.71	1:hsa;hsa-mir-6859-1,187896,187918,-	0.046747	0.0442558
hsa-miR-6859-5p	3	5	0.31	0.75	0.71	1:hsa;hsa-mir-6859-4,187896,187918,-	0.046747	0.0442558
hsa-miR-26a-2-3p	2	5	5	0.75	0.71	12:hsa;hsa-mir-26a-2,57824660,57824681,-	0.747952	0.708094
hsa-miR-943	2	5	5	0.75	0.71	4:hsa;hsa-mir-943,1986438,1986458,-	0.747952	0.708094
hsa-miR-6511b-3p	3	5	1.5	0.75	0.71	16:hsa;hsa-mir-6511b-1,15134118,15134140,-	0.224386	0.212428
hsa-miR-196b-3p	2	5	5	0.75	0.71	7:hsa;hsa-mir-196b,27169529,27169550,-	0.747952	0.708094
hsa-miR-5683	3	5	5	0.75	0.71	6:hsa;hsa-mir-5683,6169343,6169366,+	0.747952	0.708094
hsa-miR-186-3p	3	5	5	0.75	0.71	1:hsa;hsa-mir-186,71067684,71067705,-	0.747952	0.708094
hsv1-miR-H14-5p	5	5	2.5	0.75	0.71	NC_001806;hsv1-mir-H14,4478,4501,+	0.373976	0.354047
hsa-miR-3130-5p	3	5	2.5	0.75	0.71	2:hsa;hsa-mir-3130-2,206783246,206783266,+	0.373976	0.354047
hsa-miR-449a	2	5	5	0.75	0.71	5:hsa;hsa-mir-449a,55170547,55170568,-	0.747952	0.708094
hsa-miR-338-3p	2	5	5	0.75	0.71	17:hsa;hsa-mir-338,81125924,81125945,-	0.747952	0.708094
hsa-miR-488-3p	4	5	5	0.75	0.71	1:hsa;hsa-mir-488,177029414,177029434,-	0.747952	0.708094
hsa-miR-23b-5p	5	5	5	0.75	0.71	9:hsa;hsa-mir-23b,95085227,95085248,+	0.747952	0.708094
hsa-miR-6837-3p	3	5	5	0.75	0.71	7:hsa;hsa-mir-6837,44051807,44051829,+	0.747952	0.708094
hsv1-miR-H14-5p	5	5	2.5	0.75	0.71	NC_001806;hsv1-mir-H14,121832,121855,-	0.373976	0.354047
hsa-miR-6859-5p	3	5	0.31	0.75	0.71	15:hsa;hsa-mir-6859-3,101973529,101973551,+	0.046747	0.0442558
hsa-miR-6859-5p	3	5	0.31	0.75	0.71	15:hsa;hsa-mir-6859-1,101973529,101973551,+	0.046747	0.0442558
hsa-miR-6859-5p	3	5	0.31	0.75	0.71	1:hsa;hsa-mir-6859-2,187896,187918,-	0.046747	0.0442558
hsa-miR-6859-5p	3	5	0.31	0.75	0.71	1:hsa;hsa-mir-6859-3,187896,187918,-	0.046747	0.0442558
hsa-miR-3173-5p	2	5	5	0.75	0.71	14:hsa;hsa-mir-3173,95137923,95137944,-	0.747952	0.708094
hsa-miR-3939	1	4	4	0.6	0.57	6:hsa;hsa-mir-3939,166997868,166997889,-	0.598362	0.566475
hsa-miR-5588-5p	2	4	4	0.6	0.57	3:hsa;hsa-mir-5588,185253210,185253230,-	0.598362	0.566475
hsa-miR-4511	2	4	4	0.6	0.57	15:hsa;hsa-mir-4511,65719260,65719281,-	0.598362	0.566475
hsa-miR-4474-3p	4	4	4	0.6	0.57	9:hsa;hsa-mir-4474,20502309,20502330,-	0.598362	0.566475
hsa-miR-19a-5p	3	4	4	0.6	0.57	13:hsa;hsa-mir-19a,91350904,91350925,+	0.598362	0.566475
hsa-miR-597-3p	3	4	4	0.6	0.57	8:hsa;hsa-mir-597,9741729,9741751,+	0.598362	0.566475
hsa-miR-6770-5p	2	4	0.44	0.6	0.57	16:hsa;hsa-mir-6770-2,14930825,14930848,+	0.0664846	0.0629416
hsa-miR-6770-5p	2	4	0.44	0.6	0.57	16:hsa;hsa-mir-6770-1,14930825,14930848,+	0.0664846	0.0629416
hsa-miR-4510	2	4	2	0.6	0.57	15:hsa;hsa-mir-4510,35926863,35926884,+	0.299181	0.283237
hsa-miR-541-3p	4	4	4	0.6	0.57	14:hsa;hsa-mir-541,101064548,101064569,+	0.598362	0.566475
hsa-miR-6511b-3p	2	4	1	0.6	0.57	16:hsa;hsa-mir-6511b-2,2106725,2106747,-	0.14959	0.141619
hsa-miR-642a-5p	2	4	4	0.6	0.57	19:hsa;hsa-mir-642a,45674943,45674964,+	0.598362	0.566475
hsa-miR-6770-5p	2	4	0.44	0.6	0.57	16:hsa;hsa-mir-6770-3,16329310,16329333,+	0.0664846	0.0629416
hsa-miR-551b-3p	2	4	4	0.6	0.57	3:hsa;hsa-mir-551b,168551914,168551934,+	0.598362	0.566475
hsa-miR-6516-5p	3	4	4	0.6	0.57	17:hsa;hsa-mir-6516,77089428,77089449,+	0.598362	0.566475
hsa-miR-3688-3p	3	4	2.5	0.6	0.57	4:hsa;hsa-mir-3688-1,159128861,159128882,-	0.373976	0.354047
hsa-miR-6511b-3p	2	4	1	0.6	0.57	16:hsa;hsa-mir-6511b-2,15134122,15134144,-	0.14959	0.141619
hsa-miR-6513-3p	2	4	4	0.6	0.57	2:hsa;hsa-mir-6513,218280166,218280186,-	0.598362	0.566475
hsa-miR-6770-5p	2	4	0.44	0.6	0.57	16:hsa;hsa-mir-6770-3,14930825,14930848,+	0.0664846	0.0629416
hsa-miR-4773	1	4	2	0.6	0.57	2:hsa;hsa-mir-4773-2,151368381,151368402,-	0.299181	0.283237
hsa-miR-4482-3p	3	4	4	0.6	0.57	10:hsa;hsa-mir-4482,104268379,104268400,-	0.598362	0.566475
hsa-miR-219b-5p	3	4	4	0.6	0.57	9:hsa;hsa-mir-219b,128392634,128392655,+	0.598362	0.566475
hsa-miR-585-3p	3	4	4	0.6	0.57	5:hsa;hsa-mir-585,169263661,169263679,-	0.598362	0.566475
hsa-miR-6770-5p	2	4	0.44	0.6	0.57	16:hsa;hsa-mir-6770-2,18379356,18379379,-	0.0664846	0.0629416
hsa-miR-6770-5p	2	4	0.44	0.6	0.57	16:hsa;hsa-mir-6770-3,18379356,18379379,-	0.0664846	0.0629416
hsa-miR-4773	1	4	2	0.6	0.57	2:hsa;hsa-mir-4773-1,151368381,151368402,+	0.299181	0.283237
hsa-miR-4660	2	4	4	0.6	0.57	8:hsa;hsa-mir-4660,9048453,9048475,+	0.598362	0.566475
hsa-miR-2276-3p	3	4	4	0.6	0.57	13:hsa;hsa-mir-2276,24162469,24162490,+	0.598362	0.566475
hsa-miR-6770-5p	2	4	0.44	0.6	0.57	16:hsa;hsa-mir-6770-2,16329310,16329333,+	0.0664846	0.0629416
hsa-miR-1193	4	4	4	0.6	0.57	14:hsa;hsa-mir-1193,101030061,101030083,+	0.598362	0.566475
hsa-miR-4479	3	4	4	0.6	0.57	9:hsa;hsa-mir-4479,136886777,136886798,+	0.598362	0.566475
hsa-miR-5695	3	4	4	0.6	0.57	19:hsa;hsa-mir-5695,12920373,12920394,+	0.598362	0.566475
hsa-miR-3944-3p	4	4	4	0.6	0.57	10:hsa;hsa-mir-3944,133371618,133371640,-	0.598362	0.566475
hsa-miR-6858-5p	3	4	4	0.6	0.57	X:hsa;hsa-mir-6858,154450320,154450341,+	0.598362	0.566475
hsa-miR-6770-5p	2	4	0.44	0.6	0.57	16:hsa;hsa-mir-6770-1,16329310,16329333,+	0.0664846	0.0629416
hsa-miR-5010-5p	2	4	4	0.6	0.57	17:hsa;hsa-mir-5010,42514208,42514229,+	0.598362	0.566475
hsa-miR-6770-5p	2	4	0.44	0.6	0.57	16:hsa;hsa-mir-6770-1,18379356,18379379,-	0.0664846	0.0629416
hsa-miR-141-3p	2	4	4	0.6	0.57	12:hsa;hsa-mir-141,6964155,6964176,+	0.598362	0.566475
hsa-miR-3940-3p	4	4	4	0.6	0.57	19:hsa;hsa-mir-3940,6416466,6416487,-	0.598362	0.566475
hsa-miR-92a-1-5p	2	4	4	0.6	0.57	13:hsa;hsa-mir-92a-1,91351324,91351346,+	0.598362	0.566475
hsa-miR-1278	3	4	4	0.6	0.57	1:hsa;hsa-mir-1278,193136552,193136573,+	0.598362	0.566475
hsa-miR-5706	2	4	4	0.6	0.57	5:hsa;hsa-mir-5706,119154646,119154667,+	0.598362	0.566475
hsa-miR-3918	1	4	4	0.6	0.57	6:hsa;hsa-mir-3918,158764679,158764699,-	0.598362	0.566475
hsa-miR-6511a-3p	2	3	0.19	0.45	0.42	16:hsa;hsa-mir-6511a-2,16368919,16368940,+	0.0280482	0.0265535
hsa-miR-7703	1	3	3	0.45	0.42	14:hsa;hsa-mir-7703,24143543,24143565,-	0.448771	0.424856
hsa-miR-4638-3p	3	3	3	0.45	0.42	5:hsa;hsa-mir-4638,181222600,181222622,-	0.448771	0.424856
hsa-miR-3136-5p	3	3	3	0.45	0.42	3:hsa;hsa-mir-3136,69048967,69048989,-	0.448771	0.424856
hsa-miR-26a-1-3p	3	3	3	0.45	0.42	3:hsa;hsa-mir-26a-1,37969452,37969473,+	0.448771	0.424856
hsa-miR-6842-3p	2	3	3	0.45	0.42	8:hsa;hsa-mir-6842,27433413,27433434,+	0.448771	0.424856
hsa-miR-1256	3	3	3	0.45	0.42	1:hsa;hsa-mir-1256,20988348,20988369,-	0.448771	0.424856
hsa-miR-6511a-3p	2	3	0.19	0.45	0.42	16:hsa;hsa-mir-6511a-2,14925980,14926001,+	0.0280482	0.0265535
hsa-miR-6511a-3p	2	3	0.19	0.45	0.42	16:hsa;hsa-mir-6511a-3,16324631,16324652,+	0.0280482	0.0265535
hsa-miR-7704	2	3	3	0.45	0.42	2:hsa;hsa-mir-7704,176188843,176188861,+	0.448771	0.424856
hsa-miR-586	3	3	3	0.45	0.42	6:hsa;hsa-mir-586,45197689,45197710,-	0.448771	0.424856
hsa-miR-3611	3	3	3	0.45	0.42	10:hsa;hsa-mir-3611,35079649,35079669,-	0.448771	0.424856
hsa-miR-502-5p	2	3	3	0.45	0.42	X:hsa;hsa-mir-502,50014613,50014633,+	0.448771	0.424856
hsa-miR-2114-5p	1	3	3	0.45	0.42	X:hsa;hsa-mir-2114,150228016,150228037,+	0.448771	0.424856
hsa-miR-1322	2	3	3	0.45	0.42	8:hsa;hsa-mir-1322,10825423,10825441,-	0.448771	0.424856
hsa-miR-6724-5p	3	3	0.11	0.45	0.42	GL000220.1:hsa;hsa-mir-6724-2,148714,148736,+	0.0160275	0.0151734
hsa-miR-3064-5p	2	3	3	0.45	0.42	17:hsa;hsa-mir-3064,64500776,64500796,-	0.448771	0.424856
hsa-miR-570-3p	2	3	3	0.45	0.42	3:hsa;hsa-mir-570,195699460,195699481,+	0.448771	0.424856
hsa-miR-4767	3	3	3	0.45	0.42	X:hsa;hsa-mir-4767,7147869,7147891,+	0.448771	0.424856
hsa-miR-6868-3p	1	3	3	0.45	0.42	17:hsa;hsa-mir-6868,76098056,76098076,-	0.448771	0.424856
hsa-miR-4757-3p	2	3	3	0.45	0.42	2:hsa;hsa-mir-4757,19348476,19348497,+	0.448771	0.424856
hsa-miR-122b-5p	2	3	3	0.45	0.42	18:hsa;hsa-mir-122b,58451089,58451111,-	0.448771	0.424856
hsa-miR-6724-5p	3	3	0.11	0.45	0.42	KI270733.1:hsa;hsa-mir-6724-4,121591,121613,+	0.0160275	0.0151734
hsa-miR-6724-5p	3	3	0.11	0.45	0.42	21:hsa;hsa-mir-6724-1,8205325,8205347,+	0.0160275	0.0151734
hsa-miR-3126-3p	2	3	3	0.45	0.42	2:hsa;hsa-mir-3126,69103727,69103748,+	0.448771	0.424856
hsa-miR-380-5p	2	3	3	0.45	0.42	14:hsa;hsa-mir-380,101025021,101025042,+	0.448771	0.424856
hsa-miR-6724-5p	3	3	0.11	0.45	0.42	21:hsa;hsa-mir-6724-3,8205325,8205347,+	0.0160275	0.0151734
hsa-miR-6724-5p	3	3	0.11	0.45	0.42	21:hsa;hsa-mir-6724-3,8432540,8432562,+	0.0160275	0.0151734
hsa-miR-6724-5p	3	3	0.11	0.45	0.42	GL000220.1:hsa;hsa-mir-6724-3,104742,104764,+	0.0160275	0.0151734
hsa-miR-6511a-3p	2	3	0.19	0.45	0.42	16:hsa;hsa-mir-6511a-4,18344056,18344077,-	0.0280482	0.0265535
hsa-miR-1291	2	3	3	0.45	0.42	12:hsa;hsa-mir-1291,48654457,48654480,-	0.448771	0.424856
hsa-miR-6838-5p	3	3	3	0.45	0.42	7:hsa;hsa-mir-6838,44073383,44073404,-	0.448771	0.424856
hsa-miR-6724-5p	3	3	0.11	0.45	0.42	21:hsa;hsa-mir-6724-2,8249515,8249537,+	0.0160275	0.0151734
hsa-miR-6724-5p	3	3	0.11	0.45	0.42	GL000220.1:hsa;hsa-mir-6724-2,104742,104764,+	0.0160275	0.0151734
hsa-miR-6511a-3p	2	3	0.19	0.45	0.42	16:hsa;hsa-mir-6511a-4,16368919,16368940,+	0.0280482	0.0265535
hsa-miR-3145-5p	2	3	3	0.45	0.42	6:hsa;hsa-mir-3145,138435224,138435245,-	0.448771	0.424856
hsa-miR-3145-3p	2	3	3	0.45	0.42	6:hsa;hsa-mir-3145,138435261,138435284,-	0.448771	0.424856
hsa-miR-4746-3p	2	3	3	0.45	0.42	19:hsa;hsa-mir-4746,4446021,4446041,+	0.448771	0.424856
hsa-miR-6724-5p	3	3	0.11	0.45	0.42	21:hsa;hsa-mir-6724-1,8388372,8388394,+	0.0160275	0.0151734
hsa-miR-6511a-3p	2	3	0.19	0.45	0.42	16:hsa;hsa-mir-6511a-3,14925980,14926001,+	0.0280482	0.0265535
hsa-miR-6724-5p	3	3	0.11	0.45	0.42	21:hsa;hsa-mir-6724-3,8249515,8249537,+	0.0160275	0.0151734
hsa-miR-10395-3p	2	3	3	0.45	0.42	19:hsa;hsa-mir-10395,12703644,12703664,-	0.448771	0.424856
hsa-miR-6724-5p	3	3	0.11	0.45	0.42	GL000220.1:hsa;hsa-mir-6724-4,104742,104764,+	0.0160275	0.0151734
hsa-miR-4738-3p	3	3	3	0.45	0.42	17:hsa;hsa-mir-4738,75784577,75784598,-	0.448771	0.424856
hsa-miR-4786-5p	3	3	3	0.45	0.42	2:hsa;hsa-mir-4786,239943025,239943046,-	0.448771	0.424856
hsa-miR-1228-5p	2	3	3	0.45	0.42	12:hsa;hsa-mir-1228,57194504,57194524,+	0.448771	0.424856
hsa-miR-6724-5p	3	3	0.11	0.45	0.42	GL000220.1:hsa;hsa-mir-6724-1,148714,148736,+	0.0160275	0.0151734
hsa-miR-4788	2	3	3	0.45	0.42	3:hsa;hsa-mir-4788,134437836,134437857,+	0.448771	0.424856
hsa-miR-6724-5p	3	3	0.11	0.45	0.42	21:hsa;hsa-mir-6724-4,8205325,8205347,+	0.0160275	0.0151734
hsa-miR-6724-5p	3	3	0.11	0.45	0.42	21:hsa;hsa-mir-6724-3,8388372,8388394,+	0.0160275	0.0151734
hsa-miR-6511a-3p	2	3	0.19	0.45	0.42	16:hsa;hsa-mir-6511a-2,18344056,18344077,-	0.0280482	0.0265535
hsa-miR-6724-5p	3	3	0.11	0.45	0.42	GL000220.1:hsa;hsa-mir-6724-1,104742,104764,+	0.0160275	0.0151734
hsa-miR-6511a-3p	2	3	0.19	0.45	0.42	16:hsa;hsa-mir-6511a-4,16324631,16324652,+	0.0280482	0.0265535
hsa-miR-6511a-3p	2	3	0.19	0.45	0.42	16:hsa;hsa-mir-6511a-1,16324631,16324652,+	0.0280482	0.0265535
hsa-miR-3663-3p	3	3	3	0.45	0.42	10:hsa;hsa-mir-3663,117167735,117167757,-	0.448771	0.424856
hsa-miR-6724-5p	3	3	0.11	0.45	0.42	21:hsa;hsa-mir-6724-2,8388372,8388394,+	0.0160275	0.0151734
hsa-miR-5582-3p	2	3	3	0.45	0.42	11:hsa;hsa-mir-5582,46753171,46753192,-	0.448771	0.424856
hsa-miR-4796-3p	2	3	3	0.45	0.42	3:hsa;hsa-mir-4796,114743497,114743518,-	0.448771	0.424856
hsa-miR-135b-5p	3	3	3	0.45	0.42	1:hsa;hsa-mir-135b,205448317,205448339,-	0.448771	0.424856
hsa-miR-6724-5p	3	3	0.11	0.45	0.42	21:hsa;hsa-mir-6724-2,8205325,8205347,+	0.0160275	0.0151734
hsa-miR-3688-3p	2	3	1.5	0.45	0.42	4:hsa;hsa-mir-3688-2,159128861,159128882,+	0.224386	0.212428
hsa-miR-6724-5p	3	3	0.11	0.45	0.42	KI270733.1:hsa;hsa-mir-6724-2,121591,121613,+	0.0160275	0.0151734
hsa-miR-4512	2	3	3	0.45	0.42	15:hsa;hsa-mir-4512,66497006,66497027,-	0.448771	0.424856
hsa-miR-5581-3p	3	3	3	0.45	0.42	1:hsa;hsa-mir-5581,37500973,37500994,-	0.448771	0.424856
hsa-miR-4668-5p	3	3	3	0.45	0.42	9:hsa;hsa-mir-4668,111932100,111932122,+	0.448771	0.424856
hsa-miR-6724-5p	3	3	0.11	0.45	0.42	21:hsa;hsa-mir-6724-1,8432540,8432562,+	0.0160275	0.0151734
hsa-miR-6724-5p	3	3	0.11	0.45	0.42	KI270733.1:hsa;hsa-mir-6724-3,121591,121613,+	0.0160275	0.0151734
hsa-miR-3681-5p	2	3	3	0.45	0.42	2:hsa;hsa-mir-3681,12199138,12199159,+	0.448771	0.424856
hsa-miR-142-3p	3	3	3	0.45	0.42	17:hsa;hsa-mir-142,58331283,58331305,-	0.448771	0.424856
hsa-miR-6511a-3p	2	3	0.19	0.45	0.42	16:hsa;hsa-mir-6511a-1,16368919,16368940,+	0.0280482	0.0265535
hsa-miR-451a	1	3	3	0.45	0.42	17:hsa;hsa-mir-451a,28861385,28861406,-	0.448771	0.424856
hsa-miR-1343-3p	3	3	3	0.45	0.42	11:hsa;hsa-mir-1343,34941888,34941909,+	0.448771	0.424856
hsa-miR-6724-5p	3	3	0.11	0.45	0.42	GL000220.1:hsa;hsa-mir-6724-4,148714,148736,+	0.0160275	0.0151734
hsa-miR-548ay-3p	1	3	3	0.45	0.42	3:hsa;hsa-mir-548ay,32506346,32506367,-	0.448771	0.424856
hsa-miR-144-5p	2	3	3	0.45	0.42	17:hsa;hsa-mir-144,28861547,28861568,-	0.448771	0.424856
hsa-miR-1179	2	3	3	0.45	0.42	15:hsa;hsa-mir-1179,88608121,88608141,+	0.448771	0.424856
hsa-miR-130a-5p	1	3	3	0.45	0.42	11:hsa;hsa-mir-130a,57641212,57641233,+	0.448771	0.424856
hsa-miR-6724-5p	3	3	0.11	0.45	0.42	GL000220.1:hsa;hsa-mir-6724-3,148714,148736,+	0.0160275	0.0151734
hsa-miR-6511a-3p	2	3	0.19	0.45	0.42	16:hsa;hsa-mir-6511a-3,16368919,16368940,+	0.0280482	0.0265535
hsa-miR-6511a-3p	2	3	0.19	0.45	0.42	16:hsa;hsa-mir-6511a-2,16324631,16324652,+	0.0280482	0.0265535
hsa-miR-6824-3p	3	3	3	0.45	0.42	3:hsa;hsa-mir-6824,48633678,48633698,-	0.448771	0.424856
hsa-miR-6724-5p	3	3	0.11	0.45	0.42	21:hsa;hsa-mir-6724-4,8388372,8388394,+	0.0160275	0.0151734
hsa-miR-6724-5p	3	3	0.11	0.45	0.42	21:hsa;hsa-mir-6724-4,8249515,8249537,+	0.0160275	0.0151734
hsa-miR-4787-3p	2	3	3	0.45	0.42	3:hsa;hsa-mir-4787,50675130,50675153,+	0.448771	0.424856
hsa-miR-6724-5p	3	3	0.11	0.45	0.42	21:hsa;hsa-mir-6724-2,8432540,8432562,+	0.0160275	0.0151734
hsa-miR-6511a-3p	2	3	0.19	0.45	0.42	16:hsa;hsa-mir-6511a-1,14925980,14926001,+	0.0280482	0.0265535
hsa-miR-3116	1	3	1.5	0.45	0.42	1:hsa;hsa-mir-3116-2,62078830,62078851,-	0.224386	0.212428
hsa-miR-3116	1	3	1.5	0.45	0.42	1:hsa;hsa-mir-3116-1,62078830,62078851,+	0.224386	0.212428
hsa-miR-660-3p	2	3	3	0.45	0.42	X:hsa;hsa-mir-660,50013292,50013312,+	0.448771	0.424856
hsa-miR-6511a-3p	2	3	0.19	0.45	0.42	16:hsa;hsa-mir-6511a-3,18344056,18344077,-	0.0280482	0.0265535
hsa-miR-6724-5p	3	3	0.11	0.45	0.42	21:hsa;hsa-mir-6724-4,8432540,8432562,+	0.0160275	0.0151734
hsa-miR-6511a-3p	2	3	0.19	0.45	0.42	16:hsa;hsa-mir-6511a-4,14925980,14926001,+	0.0280482	0.0265535
hsa-miR-636	3	3	3	0.45	0.42	17:hsa;hsa-mir-636,76736510,76736532,-	0.448771	0.424856
hsa-miR-3127-5p	3	3	3	0.45	0.42	2:hsa;hsa-mir-3127,96798288,96798310,+	0.448771	0.424856
hsa-miR-6511a-3p	2	3	0.19	0.45	0.42	16:hsa;hsa-mir-6511a-1,18344056,18344077,-	0.0280482	0.0265535
hsa-miR-150-5p	1	3	3	0.45	0.42	19:hsa;hsa-mir-150,49500800,49500821,-	0.448771	0.424856
hsa-miR-6724-5p	3	3	0.11	0.45	0.42	KI270733.1:hsa;hsa-mir-6724-1,121591,121613,+	0.0160275	0.0151734
hsa-miR-3940-5p	1	3	3	0.45	0.42	19:hsa;hsa-mir-3940,6416432,6416451,-	0.448771	0.424856
hsa-miR-548aw	2	3	3	0.45	0.42	9:hsa;hsa-mir-548aw,132945714,132945733,+	0.448771	0.424856
hsa-miR-6724-5p	3	3	0.11	0.45	0.42	21:hsa;hsa-mir-6724-1,8249515,8249537,+	0.0160275	0.0151734
hsa-miR-4669	2	2	2	0.3	0.28	9:hsa;hsa-mir-4669,134379449,134379470,+	0.299181	0.283237
hsa-miR-577	2	2	2	0.3	0.28	4:hsa;hsa-mir-577,114656774,114656794,+	0.299181	0.283237
hsa-miR-652-5p	2	2	2	0.3	0.28	X:hsa;hsa-mir-652,110055349,110055373,+	0.299181	0.283237
hsa-miR-1306-5p	1	2	2	0.3	0.28	22:hsa;hsa-mir-1306,20086072,20086093,+	0.299181	0.283237
hsa-miR-1306-3p	2	2	2	0.3	0.28	22:hsa;hsa-mir-1306,20086112,20086129,+	0.299181	0.283237
hsa-miR-6830-5p	2	2	2	0.3	0.28	5:hsa;hsa-mir-6830,132217854,132217875,-	0.299181	0.283237
hsa-miR-3684	1	2	2	0.3	0.28	4:hsa;hsa-mir-3684,98997434,98997454,+	0.299181	0.283237
hsa-miR-187-3p	1	2	2	0.3	0.28	18:hsa;hsa-mir-187,35904888,35904909,-	0.299181	0.283237
hsa-miR-3128	2	2	2	0.3	0.28	2:hsa;hsa-mir-3128,177255949,177255971,-	0.299181	0.283237
hsa-let-7c-3p	2	2	2	0.3	0.28	21:hsa;hsa-let-7c,16539883,16539904,+	0.299181	0.283237
hsa-miR-4717-3p	2	2	2	0.3	0.28	16:hsa;hsa-mir-4717,2274661,2274681,+	0.299181	0.283237
hsa-miR-410-5p	2	2	2	0.3	0.28	14:hsa;hsa-mir-410,101065925,101065945,+	0.299181	0.283237
hsa-miR-19b-1-5p	1	2	2	0.3	0.28	13:hsa;hsa-mir-19b-1,91351207,91351229,+	0.299181	0.283237
hsa-miR-576-3p	1	2	2	0.3	0.28	4:hsa;hsa-mir-576,109488752,109488773,+	0.299181	0.283237
hsa-miR-4745-5p	2	2	2	0.3	0.28	19:hsa;hsa-mir-4745,804941,804963,+	0.299181	0.283237
hsa-miR-5587-5p	1	2	2	0.3	0.28	16:hsa;hsa-mir-5587,535316,535333,+	0.299181	0.283237
hsa-miR-412-3p	2	2	2	0.3	0.28	14:hsa;hsa-mir-412,101065500,101065522,+	0.299181	0.283237
hsa-miR-449c-5p	2	2	2	0.3	0.28	5:hsa;hsa-mir-449c,55172278,55172302,-	0.299181	0.283237
hsa-miR-6784-3p	1	2	2	0.3	0.28	17:hsa;hsa-mir-6784,45114412,45114433,-	0.299181	0.283237
hsa-miR-1252-5p	1	2	2	0.3	0.28	12:hsa;hsa-mir-1252,79419261,79419282,+	0.299181	0.283237
hsa-miR-6516-3p	1	2	2	0.3	0.28	17:hsa;hsa-mir-6516,77089469,77089490,+	0.299181	0.283237
hsa-miR-200a-3p	1	2	2	0.3	0.28	1:hsa;hsa-mir-200a,1167916,1167937,+	0.299181	0.283237
hsa-miR-3074-5p	2	2	2	0.3	0.28	9:hsa;hsa-mir-3074,95086025,95086045,-	0.299181	0.283237
hsa-miR-659-3p	2	2	2	0.3	0.28	22:hsa;hsa-mir-659,37847738,37847759,-	0.299181	0.283237
hsa-miR-1909-3p	2	2	2	0.3	0.28	19:hsa;hsa-mir-1909,1816207,1816228,-	0.299181	0.283237
hsa-miR-10b-3p	2	2	2	0.3	0.28	2:hsa;hsa-mir-10b,176150368,176150389,+	0.299181	0.283237
hsa-miR-4679	2	2	1	0.3	0.28	10:hsa;hsa-mir-4679-1,89063344,89063365,+	0.14959	0.141619
hsa-miR-7155-3p	1	2	2	0.3	0.28	11:hsa;hsa-mir-7155,64341886,64341904,-	0.299181	0.283237
hsa-miR-6836-5p	2	2	2	0.3	0.28	7:hsa;hsa-mir-6836,2257520,2257541,-	0.299181	0.283237
hsa-miR-3157-3p	1	2	2	0.3	0.28	10:hsa;hsa-mir-3157,96064372,96064393,-	0.299181	0.283237
hsa-miR-6886-5p	1	2	2	0.3	0.28	19:hsa;hsa-mir-6886,11113479,11113499,+	0.299181	0.283237
hsa-miR-15a-3p	2	2	2	0.3	0.28	13:hsa;hsa-mir-15a,50049169,50049190,-	0.299181	0.283237
hsa-miR-4743-5p	2	2	2	0.3	0.28	18:hsa;hsa-mir-4743,48670602,48670624,+	0.299181	0.283237
hsa-miR-487b-5p	2	2	2	0.3	0.28	14:hsa;hsa-mir-487b,101046469,101046490,+	0.299181	0.283237
hsa-miR-429	2	2	2	0.3	0.28	1:hsa;hsa-mir-429,1169055,1169076,+	0.299181	0.283237
hsa-miR-548a-3p	1	2	0.67	0.3	0.28	6:hsa;hsa-mir-548a-2,135239220,135239241,+	0.099727	0.0944125
hsa-miR-378g	1	2	2	0.3	0.28	1:hsa;hsa-mir-378g,94745861,94745880,-	0.299181	0.283237
hsa-miR-3177-3p	2	2	2	0.3	0.28	16:hsa;hsa-mir-3177,1735038,1735058,+	0.299181	0.283237
hsa-miR-6815-3p	2	2	2	0.3	0.28	21:hsa;hsa-mir-6815,45478306,45478326,+	0.299181	0.283237
hsa-miR-939-5p	2	2	2	0.3	0.28	8:hsa;hsa-mir-939,144394163,144394186,-	0.299181	0.283237
hsa-miR-939-3p	2	2	2	0.3	0.28	8:hsa;hsa-mir-939,144394198,144394218,-	0.299181	0.283237
hsa-miR-4755-3p	2	2	2	0.3	0.28	20:hsa;hsa-mir-4755,34049162,34049183,+	0.299181	0.283237
hsa-miR-6847-5p	2	2	2	0.3	0.28	8:hsa;hsa-mir-6847,144079879,144079901,+	0.299181	0.283237
hsa-miR-3165	2	2	2	0.3	0.28	11:hsa;hsa-mir-3165,72072237,72072258,-	0.299181	0.283237
hsa-miR-3163	1	2	2	0.3	0.28	11:hsa;hsa-mir-3163,66934443,66934464,-	0.299181	0.283237
hsa-miR-548a-3p	1	2	0.67	0.3	0.28	6:hsa;hsa-mir-548a-1,18571844,18571865,+	0.099727	0.0944125
hsa-miR-3150a-5p	1	2	2	0.3	0.28	8:hsa;hsa-mir-3150a,95072925,95072946,+	0.299181	0.283237
hsa-miR-3911	2	2	2	0.3	0.28	9:hsa;hsa-mir-3911,127690698,127690719,-	0.299181	0.283237
hsa-miR-4679	2	2	1	0.3	0.28	10:hsa;hsa-mir-4679-2,89063344,89063365,-	0.14959	0.141619
hsa-miR-4666a-5p	2	2	2	0.3	0.28	1:hsa;hsa-mir-4666a,228462083,228462103,+	0.299181	0.283237
hsa-miR-491-5p	2	2	2	0.3	0.28	9:hsa;hsa-mir-491,20716120,20716141,+	0.299181	0.283237
hsa-miR-3685	2	2	2	0.3	0.28	12:hsa;hsa-mir-3685,95309928,95309949,+	0.299181	0.283237
hsa-miR-3690	2	2	1	0.3	0.28	X:hsa;hsa-mir-3690-1,1293927,1293949,+	0.14959	0.141619
hsa-miR-3124-5p	1	2	2	0.3	0.28	1:hsa;hsa-mir-3124,248826383,248826403,+	0.299181	0.283237
hsa-miR-1245b-5p	2	2	2	0.3	0.28	2:hsa;hsa-mir-1245b,188978101,188978121,-	0.299181	0.283237
hsa-miR-6505-5p	2	2	2	0.3	0.28	12:hsa;hsa-mir-6505,48132800,48132821,+	0.299181	0.283237
hsa-miR-9901	2	2	2	0.3	0.28	16:hsa;hsa-mir-9901,34163601,34163621,+	0.299181	0.283237
hsa-miR-449b-5p	2	2	2	0.3	0.28	5:hsa;hsa-mir-449b,55170661,55170682,-	0.299181	0.283237
hsa-miR-545-3p	2	2	2	0.3	0.28	X:hsa;hsa-mir-545,74287166,74287187,-	0.299181	0.283237
hsa-miR-4682	2	2	2	0.3	0.28	10:hsa;hsa-mir-4682,119958522,119958544,+	0.299181	0.283237
hsa-miR-656-5p	2	2	2	0.3	0.28	14:hsa;hsa-mir-656,101066731,101066751,+	0.299181	0.283237
hsa-miR-6850-3p	2	2	2	0.3	0.28	8:hsa;hsa-mir-6850,144791968,144791987,-	0.299181	0.283237
hsa-miR-503-3p	2	2	2	0.3	0.28	X:hsa;hsa-mir-503,134546373,134546395,-	0.299181	0.283237
hsa-miR-6733-5p	2	2	2	0.3	0.28	1:hsa;hsa-mir-6733,43171657,43171678,-	0.299181	0.283237
hsa-miR-548a-3p	1	2	0.67	0.3	0.28	8:hsa;hsa-mir-548a-3,104484429,104484450,-	0.099727	0.0944125
hsa-miR-4485-3p	2	2	2	0.3	0.28	11:hsa;hsa-mir-4485,10508300,10508319,-	0.299181	0.283237
hsa-miR-219a-5p	2	2	2	0.3	0.28	6:hsa;hsa-mir-219a-1,33207855,33207875,+	0.299181	0.283237
hsa-miR-3677-5p	1	2	2	0.3	0.28	16:hsa;hsa-mir-3677,2270715,2270736,+	0.299181	0.283237
hsa-miR-8072	2	2	2	0.3	0.28	12:hsa;hsa-mir-8072,123364774,123364793,-	0.299181	0.283237
hsa-miR-4671-3p	1	2	2	0.3	0.28	1:hsa;hsa-mir-4671,234306512,234306532,+	0.299181	0.283237
hsa-miR-760	2	2	2	0.3	0.28	1:hsa;hsa-mir-760,93846880,93846899,+	0.299181	0.283237
hsa-miR-548p	2	2	2	0.3	0.28	5:hsa;hsa-mir-548p,100816528,100816549,-	0.299181	0.283237
hsa-miR-4727-3p	1	2	2	0.3	0.28	17:hsa;hsa-mir-4727,38825871,38825892,+	0.299181	0.283237
hsa-miR-4662a-3p	1	2	2	0.3	0.28	8:hsa;hsa-mir-4662a,124822027,124822048,+	0.299181	0.283237
hsa-miR-6761-5p	2	2	2	0.3	0.28	12:hsa;hsa-mir-6761,111799839,111799859,+	0.299181	0.283237
hsa-miR-4709-5p	1	2	2	0.3	0.28	14:hsa;hsa-mir-4709,74480141,74480162,-	0.299181	0.283237
hsa-miR-4709-3p	2	2	2	0.3	0.28	14:hsa;hsa-mir-4709,74480180,74480202,-	0.299181	0.283237
hsa-miR-3690	2	2	1	0.3	0.28	X:hsa;hsa-mir-3690-2,1293927,1293949,+	0.14959	0.141619
hsa-miR-4742-5p	1	2	2	0.3	0.28	1:hsa;hsa-mir-4742,224398227,224398249,-	0.299181	0.283237
hsa-miR-1908-3p	2	2	2	0.3	0.28	11:hsa;hsa-mir-1908,61815209,61815229,-	0.299181	0.283237
hsa-miR-1287-3p	1	2	2	0.3	0.28	10:hsa;hsa-mir-1287,98395272,98395293,-	0.299181	0.283237
hsa-miR-141-5p	2	2	2	0.3	0.28	12:hsa;hsa-mir-141,6964113,6964134,+	0.299181	0.283237
hsa-miR-6764-3p	2	2	2	0.3	0.28	14:hsa;hsa-mir-6764,100277397,100277417,+	0.299181	0.283237
hsa-miR-6892-5p	2	2	2	0.3	0.28	7:hsa;hsa-mir-6892,143382686,143382706,+	0.299181	0.283237
hsa-miR-183-3p	2	2	2	0.3	0.28	7:hsa;hsa-mir-183,129774970,129774991,-	0.299181	0.283237
hsa-miR-4699-5p	2	2	2	0.3	0.28	12:hsa;hsa-mir-4699,81158397,81158418,+	0.299181	0.283237
hsa-miR-4477a	1	1	0.5	0.15	0.14	9:hsa;hsa-mir-4477a,41233802,41233823,+	0.0747952	0.0708094
hsa-miR-1293	1	1	1	0.15	0.14	12:hsa;hsa-mir-1293,50234151,50234172,-	0.14959	0.141619
hsa-miR-6772-5p	1	1	1	0.15	0.14	16:hsa;hsa-mir-6772,57772294,57772315,-	0.14959	0.141619
hsa-miR-6772-3p	1	1	1	0.15	0.14	16:hsa;hsa-mir-6772,57772329,57772351,-	0.14959	0.141619
hsa-miR-6759-5p	1	1	1	0.15	0.14	12:hsa;hsa-mir-6759,57748623,57748644,-	0.14959	0.141619
hsa-miR-6859-3p	1	1	0.06	0.15	0.14	1:hsa;hsa-mir-6859-4,17414,17436,-	0.0093494	0.00885117
hsa-miR-6508-5p	1	1	1	0.15	0.14	21:hsa;hsa-mir-6508,39447014,39447034,+	0.14959	0.141619
hsa-miR-5585-5p	1	1	1	0.15	0.14	1:hsa;hsa-mir-5585,32086949,32086970,+	0.14959	0.141619
hsa-miR-550a-3-5p	1	1	0.33	0.15	0.14	7:hsa;hsa-mir-550a-3,29680754,29680773,-	0.0498635	0.0472062
hsa-miR-4424	1	1	1	0.15	0.14	1:hsa;hsa-mir-4424,178677763,178677784,+	0.14959	0.141619
hsa-miR-1915-5p	1	1	1	0.15	0.14	10:hsa;hsa-mir-1915,21496573,21496594,-	0.14959	0.141619
hsa-miR-1914-5p	1	1	1	0.15	0.14	20:hsa;hsa-mir-1914,63941477,63941498,-	0.14959	0.141619
hsa-miR-6859-3p	1	1	0.06	0.15	0.14	1:hsa;hsa-mir-6859-2,17414,17436,-	0.0093494	0.00885117
hsa-miR-378a-5p	1	1	1	0.15	0.14	5:hsa;hsa-mir-378a,149732829,149732850,+	0.14959	0.141619
hsa-miR-6862-5p	1	1	0.25	0.15	0.14	16:hsa;hsa-mir-6862-1,28724257,28724278,+	0.0373976	0.0354047
hsa-miR-5680	1	1	1	0.15	0.14	8:hsa;hsa-mir-5680,102125483,102125504,+	0.14959	0.141619
hsa-miR-1286	1	1	1	0.15	0.14	22:hsa;hsa-mir-1286,20249180,20249200,-	0.14959	0.141619
hsa-miR-3199	1	1	0.5	0.15	0.14	22:hsa;hsa-mir-3199-1,27920534,27920556,-	0.0747952	0.0708094
hsa-miR-6839-5p	1	1	1	0.15	0.14	7:hsa;hsa-mir-6839,64679069,64679090,+	0.14959	0.141619
hsa-miR-4477b	1	1	0.5	0.15	0.14	9:hsa;hsa-mir-4477b,63819623,63819644,+	0.0747952	0.0708094
hsa-miR-1538	1	1	1	0.15	0.14	16:hsa;hsa-mir-1538,69565846,69565868,-	0.14959	0.141619
hsa-miR-6859-3p	1	1	0.06	0.15	0.14	16:hsa;hsa-mir-6859-2,17097,17119,-	0.0093494	0.00885117
hsa-miR-4797-3p	1	1	1	0.15	0.14	3:hsa;hsa-mir-4797,197293918,197293938,-	0.14959	0.141619
hsa-miR-6769b-3p	1	1	1	0.15	0.14	1:hsa;hsa-mir-6769b,206474844,206474864,+	0.14959	0.141619
hsa-miR-4677-5p	1	1	1	0.15	0.14	1:hsa;hsa-mir-4677,243346188,243346209,+	0.14959	0.141619
hsa-miR-548ah-5p	1	1	1	0.15	0.14	4:hsa;hsa-mir-548ah,76575561,76575580,+	0.14959	0.141619
hsa-miR-4661-3p	1	1	1	0.15	0.14	8:hsa;hsa-mir-4661,91205531,91205552,+	0.14959	0.141619
hsa-miR-11399	1	1	1	0.15	0.14	1:hsa;hsa-mir-11399,112882060,112882081,+	0.14959	0.141619
hsa-miR-7114-5p	1	1	1	0.15	0.14	9:hsa;hsa-mir-7114,137450031,137450051,-	0.14959	0.141619
hsa-miR-6862-5p	1	1	0.25	0.15	0.14	16:hsa;hsa-mir-6862-1,28390987,28391008,-	0.0373976	0.0354047
hsa-miR-2114-3p	1	1	1	0.15	0.14	X:hsa;hsa-mir-2114,150228052,150228072,+	0.14959	0.141619
hsa-miR-3190-3p	1	1	1	0.15	0.14	19:hsa;hsa-mir-3190,47226988,47227010,+	0.14959	0.141619
hsa-miR-155-3p	1	1	1	0.15	0.14	21:hsa;hsa-mir-155,25574022,25574043,+	0.14959	0.141619
hsa-miR-3614-5p	1	1	1	0.15	0.14	17:hsa;hsa-mir-3614,56891284,56891306,-	0.14959	0.141619
hsa-miR-4477a	1	1	0.5	0.15	0.14	9:hsa;hsa-mir-4477a,63819621,63819642,-	0.0747952	0.0708094
hsa-miR-4637	1	1	1	0.15	0.14	5:hsa;hsa-mir-4637,14825988,14826009,-	0.14959	0.141619
hsa-miR-4439	1	1	1	0.15	0.14	2:hsa;hsa-mir-4439,225010464,225010485,-	0.14959	0.141619
hsa-miR-4745-3p	1	1	1	0.15	0.14	19:hsa;hsa-mir-4745,804977,804999,+	0.14959	0.141619
hsa-miR-4649-3p	1	1	1	0.15	0.14	7:hsa;hsa-mir-4649,44110891,44110911,+	0.14959	0.141619
hsa-miR-1284	1	1	1	0.15	0.14	3:hsa;hsa-mir-1284,71541999,71542020,-	0.14959	0.141619
hsa-miR-4803	1	1	1	0.15	0.14	5:hsa;hsa-mir-4803,72169476,72169496,+	0.14959	0.141619
hsa-miR-548i	1	1	0.25	0.15	0.14	X:hsa;hsa-mir-548i-4,84225762,84225783,-	0.0373976	0.0354047
hsa-miR-6859-3p	1	1	0.06	0.15	0.14	16:hsa;hsa-mir-6859-1,17097,17119,-	0.0093494	0.00885117
hsa-miR-4708-3p	1	1	1	0.15	0.14	14:hsa;hsa-mir-4708,65335156,65335177,-	0.14959	0.141619
hsa-miR-6827-3p	1	1	1	0.15	0.14	3:hsa;hsa-mir-6827,134367842,134367862,-	0.14959	0.141619
hsa-miR-16-1-3p	1	1	1	0.15	0.14	13:hsa;hsa-mir-16-1,50049028,50049049,-	0.14959	0.141619
hsa-miR-6869-5p	1	1	1	0.15	0.14	20:hsa;hsa-mir-6869,1392900,1392921,-	0.14959	0.141619
hsa-miR-1249-3p	1	1	1	0.15	0.14	22:hsa;hsa-mir-1249,45200994,45201015,-	0.14959	0.141619
hsa-miR-20b-5p	1	1	1	0.15	0.14	X:hsa;hsa-mir-20b,134169814,134169836,-	0.14959	0.141619
hsa-miR-3662	1	1	1	0.15	0.14	6:hsa;hsa-mir-3662,134979392,134979415,-	0.14959	0.141619
hsa-miR-4286	1	1	1	0.15	0.14	8:hsa;hsa-mir-4286,10666988,10667004,+	0.14959	0.141619
hsa-miR-6728-5p	1	1	1	0.15	0.14	1:hsa;hsa-mir-6728,8866507,8866529,-	0.14959	0.141619
hsa-miR-6757-3p	1	1	1	0.15	0.14	12:hsa;hsa-mir-6757,53056990,53057011,+	0.14959	0.141619
hsa-miR-4730	1	1	1	0.15	0.14	17:hsa;hsa-mir-4730,80419427,80419449,+	0.14959	0.141619
hsa-miR-3942-3p	1	1	1	0.15	0.14	15:hsa;hsa-mir-3942,35372320,35372340,-	0.14959	0.141619
hsa-miR-7854-3p	1	1	1	0.15	0.14	16:hsa;hsa-mir-7854,81533942,81533962,+	0.14959	0.141619
hsa-miR-937-5p	1	1	1	0.15	0.14	8:hsa;hsa-mir-937,143812970,143812989,-	0.14959	0.141619
hsa-miR-184	1	1	1	0.15	0.14	15:hsa;hsa-mir-184,79209840,79209861,+	0.14959	0.141619
hsa-miR-548d-3p	1	1	0.5	0.15	0.14	17:hsa;hsa-mir-548d-2,67471549,67471570,-	0.0747952	0.0708094
hsa-miR-181d-3p	1	1	1	0.15	0.14	19:hsa;hsa-mir-181d,13874953,13874973,+	0.14959	0.141619
hsa-miR-3691-3p	1	1	1	0.15	0.14	6:hsa;hsa-mir-3691,5148288,5148309,-	0.14959	0.141619
hsa-miR-548ap-5p	1	1	0.5	0.15	0.14	15:hsa;hsa-mir-548ap,85825655,85825673,+	0.0747952	0.0708094
hsa-miR-10392-5p	1	1	1	0.15	0.14	11:hsa;hsa-mir-10392,64878523,64878545,-	0.14959	0.141619
hsa-miR-194-3p	1	1	1	0.15	0.14	11:hsa;hsa-mir-194-2,64891405,64891426,-	0.14959	0.141619
hsa-miR-4684-5p	1	1	1	0.15	0.14	1:hsa;hsa-mir-4684,22719530,22719551,+	0.14959	0.141619
hsa-miR-4477b	1	1	0.5	0.15	0.14	9:hsa;hsa-mir-4477b,41233804,41233825,-	0.0747952	0.0708094
hsa-miR-3194-5p	1	1	1	0.15	0.14	20:hsa;hsa-mir-3194,51452914,51452934,-	0.14959	0.141619
hsa-miR-802	1	1	1	0.15	0.14	21:hsa;hsa-mir-802,35720732,35720754,+	0.14959	0.141619
hsa-miR-6513-5p	1	1	1	0.15	0.14	2:hsa;hsa-mir-6513,218280127,218280149,-	0.14959	0.141619
hsa-miR-548i	1	1	0.25	0.15	0.14	3:hsa;hsa-mir-548i-1,125790442,125790463,-	0.0373976	0.0354047
hsa-miR-1292-5p	1	1	1	0.15	0.14	20:hsa;hsa-mir-1292,2652779,2652803,+	0.14959	0.141619
hsa-miR-6859-3p	1	1	0.06	0.15	0.14	1:hsa;hsa-mir-6859-3,17414,17436,-	0.0093494	0.00885117
hsa-miR-6862-5p	1	1	0.25	0.15	0.14	16:hsa;hsa-mir-6862-2,28724257,28724278,+	0.0373976	0.0354047
hsa-miR-4753-5p	1	1	1	0.15	0.14	1:hsa;hsa-mir-4753,235190043,235190064,-	0.14959	0.141619
hsa-miR-1229-3p	1	1	1	0.15	0.14	5:hsa;hsa-mir-1229,179798324,179798346,-	0.14959	0.141619
hsa-miR-6865-5p	1	1	1	0.15	0.14	17:hsa;hsa-mir-6865,4970091,4970113,-	0.14959	0.141619
hsa-miR-548i	1	1	0.25	0.15	0.14	4:hsa;hsa-mir-548i-2,9556206,9556227,-	0.0373976	0.0354047
hsa-miR-6859-3p	1	1	0.06	0.15	0.14	15:hsa;hsa-mir-6859-4,101973569,101973591,+	0.0093494	0.00885117
hsa-miR-1468-3p	1	1	1	0.15	0.14	X:hsa;hsa-mir-1468,63786056,63786077,-	0.14959	0.141619
hsa-miR-3140-3p	1	1	1	0.15	0.14	4:hsa;hsa-mir-3140,152489386,152489407,-	0.14959	0.141619
hsa-miR-4999-5p	1	1	1	0.15	0.14	19:hsa;hsa-mir-4999,8389310,8389330,-	0.14959	0.141619
hsa-miR-3157-5p	1	1	1	0.15	0.14	10:hsa;hsa-mir-3157,96064324,96064345,-	0.14959	0.141619
hsa-miR-581	1	1	1	0.15	0.14	5:hsa;hsa-mir-581,53951519,53951539,-	0.14959	0.141619
hsa-miR-3926	1	1	0.5	0.15	0.14	8:hsa;hsa-mir-3926-1,12727242,12727262,-	0.0747952	0.0708094
hsa-miR-1537-5p	1	1	1	0.15	0.14	1:hsa;hsa-mir-1537,235853002,235853023,-	0.14959	0.141619
hsa-miR-1537-3p	1	1	1	0.15	0.14	1:hsa;hsa-mir-1537,235853039,235853060,-	0.14959	0.141619
hsa-miR-548aq-5p	1	1	1	0.15	0.14	3:hsa;hsa-mir-548aq,185767847,185767868,-	0.14959	0.141619
hsa-miR-590-5p	1	1	1	0.15	0.14	7:hsa;hsa-mir-590,74191213,74191234,+	0.14959	0.141619
hsa-miR-3177-5p	1	1	1	0.15	0.14	16:hsa;hsa-mir-3177,1734995,1735017,+	0.14959	0.141619
hsa-miR-3155a	1	1	1	0.15	0.14	10:hsa;hsa-mir-3155a,6152247,6152267,+	0.14959	0.141619
hsa-miR-3678-5p	1	1	1	0.15	0.14	17:hsa;hsa-mir-3678,75406077,75406096,+	0.14959	0.141619
hsa-miR-6859-3p	1	1	0.06	0.15	0.14	1:hsa;hsa-mir-6859-1,17414,17436,-	0.0093494	0.00885117
hsa-miR-6859-3p	1	1	0.06	0.15	0.14	15:hsa;hsa-mir-6859-2,101973569,101973591,+	0.0093494	0.00885117
hsa-miR-3121-3p	1	1	1	0.15	0.14	1:hsa;hsa-mir-3121,180438360,180438381,-	0.14959	0.141619
hsa-miR-7156-5p	1	1	1	0.15	0.14	1:hsa;hsa-mir-7156,77060143,77060165,+	0.14959	0.141619
hsa-miR-301b-5p	1	1	1	0.15	0.14	22:hsa;hsa-mir-301b,21652990,21653011,+	0.14959	0.141619
hsa-miR-1277-3p	1	1	1	0.15	0.14	X:hsa;hsa-mir-1277,118386440,118386461,+	0.14959	0.141619
hsa-miR-3131	1	1	1	0.15	0.14	2:hsa;hsa-mir-3131,219058691,219058713,-	0.14959	0.141619
hsa-miR-497-3p	1	1	1	0.15	0.14	17:hsa;hsa-mir-497,7017974,7017995,-	0.14959	0.141619
hsa-miR-585-5p	1	1	1	0.15	0.14	5:hsa;hsa-mir-585,169263625,169263646,-	0.14959	0.141619
hsa-miR-548ar-3p	1	1	1	0.15	0.14	13:hsa;hsa-mir-548ar,114244541,114244561,+	0.14959	0.141619
hsa-miR-6859-3p	1	1	0.06	0.15	0.14	16:hsa;hsa-mir-6859-3,17097,17119,-	0.0093494	0.00885117
hsa-miR-548ao-3p	1	1	1	0.15	0.14	8:hsa;hsa-mir-548ao,41271105,41271126,-	0.14959	0.141619
hsa-miR-548ax	1	1	1	0.15	0.14	X:hsa;hsa-mir-548ax,11318623,11318644,-	0.14959	0.141619
hsa-miR-4467	1	1	1	0.15	0.14	7:hsa;hsa-mir-4467,102471472,102471493,+	0.14959	0.141619
hsa-miR-6859-3p	1	1	0.06	0.15	0.14	16:hsa;hsa-mir-6859-4,17097,17119,-	0.0093494	0.00885117
hsa-miR-6512-5p	1	1	1	0.15	0.14	2:hsa;hsa-mir-6512,177313814,177313835,-	0.14959	0.141619
hsa-miR-6507-5p	1	1	1	0.15	0.14	10:hsa;hsa-mir-6507,98924504,98924524,-	0.14959	0.141619
hsa-miR-4791	1	1	1	0.15	0.14	3:hsa;hsa-mir-4791,19314855,19314872,-	0.14959	0.141619
hsa-miR-4715-5p	1	1	1	0.15	0.14	15:hsa;hsa-mir-4715,25848756,25848777,-	0.14959	0.141619
hsa-miR-4715-3p	1	1	1	0.15	0.14	15:hsa;hsa-mir-4715,25848792,25848814,-	0.14959	0.141619
hsa-miR-4687-3p	1	1	1	0.15	0.14	11:hsa;hsa-mir-4687,3856113,3856133,+	0.14959	0.141619
hsa-miR-1247-5p	1	1	1	0.15	0.14	14:hsa;hsa-mir-1247,101560326,101560347,-	0.14959	0.141619
hsv1-miR-H13	1	1	0.5	0.15	0.14	NC_001806;hsv1-mir-H13,146201,146223,-	0.0747952	0.0708094
hsa-miR-6859-3p	1	1	0.06	0.15	0.14	1:hsa;hsa-mir-6859-1,187936,187958,-	0.0093494	0.00885117
hsa-miR-135b-3p	1	1	1	0.15	0.14	1:hsa;hsa-mir-135b,205448356,205448377,-	0.14959	0.141619
hsa-miR-6738-3p	1	1	1	0.15	0.14	1:hsa;hsa-mir-6738,155951313,155951336,-	0.14959	0.141619
hsa-miR-6859-3p	1	1	0.06	0.15	0.14	1:hsa;hsa-mir-6859-4,187936,187958,-	0.0093494	0.00885117
hsa-miR-3668	1	1	1	0.15	0.14	6:hsa;hsa-mir-3668,140205260,140205280,+	0.14959	0.141619
hsa-miR-6874-5p	1	1	1	0.15	0.14	7:hsa;hsa-mir-6874,5711845,5711867,-	0.14959	0.141619
hsa-miR-9-3p	1	1	0.5	0.15	0.14	5:hsa;hsa-mir-9-2,88666905,88666926,-	0.0747952	0.0708094
hsa-miR-6855-3p	1	1	1	0.15	0.14	9:hsa;hsa-mir-6855,129869650,129869671,+	0.14959	0.141619
hsa-miR-6861-5p	1	1	1	0.15	0.14	12:hsa;hsa-mir-6861,112163263,112163284,-	0.14959	0.141619
hsa-miR-4714-5p	1	1	1	0.15	0.14	15:hsa;hsa-mir-4714,98784435,98784456,+	0.14959	0.141619
hsa-miR-4714-3p	1	1	1	0.15	0.14	15:hsa;hsa-mir-4714,98784473,98784494,+	0.14959	0.141619
hsa-miR-1289	1	1	0.5	0.15	0.14	20:hsa;hsa-mir-1289-1,35454039,35454061,-	0.0747952	0.0708094
hsa-miR-5094	1	1	1	0.15	0.14	15:hsa;hsa-mir-5094,89850647,89850668,-	0.14959	0.141619
hsa-miR-584-3p	1	1	1	0.15	0.14	5:hsa;hsa-mir-584,149062367,149062388,-	0.14959	0.141619
hsa-miR-6850-5p	1	1	1	0.15	0.14	8:hsa;hsa-mir-6850,144791931,144791952,-	0.14959	0.141619
hsa-miR-548c-3p	1	1	1	0.15	0.14	12:hsa;hsa-mir-548c,64622569,64622590,+	0.14959	0.141619
hsa-miR-933	1	1	1	0.15	0.14	2:hsa;hsa-mir-933,175167679,175167700,-	0.14959	0.141619
hsa-miR-4795-5p	1	1	1	0.15	0.14	3:hsa;hsa-mir-4795,87226206,87226226,-	0.14959	0.141619
hsa-miR-3135a	1	1	1	0.15	0.14	3:hsa;hsa-mir-3135a,20137574,20137595,+	0.14959	0.141619
hsa-miR-4711-5p	1	1	1	0.15	0.14	1:hsa;hsa-mir-4711,59733232,59733254,-	0.14959	0.141619
hsa-miR-1910-3p	1	1	1	0.15	0.14	16:hsa;hsa-mir-1910,85741671,85741690,-	0.14959	0.141619
hsa-miR-1343-5p	1	1	1	0.15	0.14	11:hsa;hsa-mir-1343,34941851,34941872,+	0.14959	0.141619
hsa-miR-4689	1	1	1	0.15	0.14	1:hsa;hsa-mir-4689,5862681,5862702,-	0.14959	0.141619
hsa-miR-4800-3p	1	1	1	0.15	0.14	4:hsa;hsa-mir-4800,2250124,2250142,-	0.14959	0.141619
hsa-miR-6866-3p	1	1	1	0.15	0.14	17:hsa;hsa-mir-6866,40161980,40162001,+	0.14959	0.141619
hsa-miR-6529-5p	1	1	1	0.15	0.14	3:hsa;hsa-mir-6529,120084577,120084598,-	0.14959	0.141619
hsa-miR-2277-3p	1	1	1	0.15	0.14	5:hsa;hsa-mir-2277,93620754,93620774,-	0.14959	0.141619
hsa-miR-1913	1	1	1	0.15	0.14	6:hsa;hsa-mir-1913,166509402,166509423,-	0.14959	0.141619
hsa-miR-3134	1	1	1	0.15	0.14	3:hsa;hsa-mir-3134,15697342,15697364,-	0.14959	0.141619
hsa-miR-6881-3p	1	1	1	0.15	0.14	15:hsa;hsa-mir-6881,74411407,74411428,-	0.14959	0.141619
hsa-miR-1289	1	1	0.5	0.15	0.14	5:hsa;hsa-mir-1289-2,133427665,133427687,-	0.0747952	0.0708094
hsa-miR-877-3p	1	1	1	0.15	0.14	6:hsa;hsa-mir-877,30584397,30584417,+	0.14959	0.141619
hsa-miR-4647	1	1	1	0.15	0.14	6:hsa;hsa-mir-4647,44254216,44254238,-	0.14959	0.141619
hsa-miR-4672	1	1	1	0.15	0.14	9:hsa;hsa-mir-4672,127869465,127869485,-	0.14959	0.141619
hsa-miR-6800-5p	1	1	1	0.15	0.14	19:hsa;hsa-mir-6800,49832022,49832042,+	0.14959	0.141619
hsa-miR-3936	1	1	1	0.15	0.14	5:hsa;hsa-mir-3936,132365555,132365576,-	0.14959	0.141619
hsa-miR-6820-5p	1	1	1	0.15	0.14	22:hsa;hsa-mir-6820,37967568,37967586,+	0.14959	0.141619
hsa-miR-216a-3p	1	1	1	0.15	0.14	2:hsa;hsa-mir-216a,55989007,55989028,-	0.14959	0.141619
hsv1-miR-H14-3p	1	1	0.5	0.15	0.14	NC_001806;hsv1-mir-H14,4521,4541,+	0.0747952	0.0708094
hsa-miR-548d-3p	1	1	0.5	0.15	0.14	8:hsa;hsa-mir-548d-1,123348094,123348115,-	0.0747952	0.0708094
hsa-miR-5696	1	1	1	0.15	0.14	2:hsa;hsa-mir-5696,101309453,101309474,+	0.14959	0.141619
hsa-miR-4712-3p	1	1	1	0.15	0.14	15:hsa;hsa-mir-4712,50360385,50360405,+	0.14959	0.141619
hsa-miR-624-3p	1	1	1	0.15	0.14	14:hsa;hsa-mir-624,31014699,31014719,-	0.14959	0.141619
hsa-miR-6783-5p	1	1	1	0.15	0.14	17:hsa;hsa-mir-6783,44934623,44934644,-	0.14959	0.141619
hsa-miR-6783-3p	1	1	1	0.15	0.14	17:hsa;hsa-mir-6783,44934660,44934681,-	0.14959	0.141619
hsa-miR-6798-3p	1	1	1	0.15	0.14	19:hsa;hsa-mir-6798,49009952,49009972,+	0.14959	0.141619
hsa-miR-3200-5p	1	1	1	0.15	0.14	22:hsa;hsa-mir-3200,30731569,30731590,+	0.14959	0.141619
hsa-miR-4723-5p	1	1	1	0.15	0.14	17:hsa;hsa-mir-4723,28360660,28360683,+	0.14959	0.141619
hsa-miR-3133	1	1	1	0.15	0.14	2:hsa;hsa-mir-3133,241477914,241477935,+	0.14959	0.141619
hsa-miR-6509-5p	1	1	1	0.15	0.14	7:hsa;hsa-mir-6509,135207008,135207028,-	0.14959	0.141619
hsa-miR-6862-5p	1	1	0.25	0.15	0.14	16:hsa;hsa-mir-6862-2,28390987,28391008,-	0.0373976	0.0354047
hsa-miR-338-5p	1	1	1	0.15	0.14	17:hsa;hsa-mir-338,81125888,81125909,-	0.14959	0.141619
hsa-miR-2278	1	1	1	0.15	0.14	9:hsa;hsa-mir-2278,94809977,94809998,+	0.14959	0.141619
hsa-miR-3199	1	1	0.5	0.15	0.14	22:hsa;hsa-mir-3199-2,27920535,27920557,+	0.0747952	0.0708094
hsa-miR-6851-5p	1	1	1	0.15	0.14	9:hsa;hsa-mir-6851,33467874,33467896,-	0.14959	0.141619
hsa-miR-4804-5p	1	1	1	0.15	0.14	5:hsa;hsa-mir-4804,72878600,72878620,+	0.14959	0.141619
hsa-miR-4804-3p	1	1	1	0.15	0.14	5:hsa;hsa-mir-4804,72878635,72878655,+	0.14959	0.141619
hsa-miR-217-3p	1	1	1	0.15	0.14	2:hsa;hsa-mir-217,55983038,55983059,-	0.14959	0.141619
hsa-miR-6837-5p	1	1	1	0.15	0.14	7:hsa;hsa-mir-6837,44051771,44051791,+	0.14959	0.141619
hsv1-miR-H14-3p	1	1	0.5	0.15	0.14	NC_001806;hsv1-mir-H14,121875,121895,-	0.0747952	0.0708094
hsa-miR-3926	1	1	0.5	0.15	0.14	8:hsa;hsa-mir-3926-2,12727242,12727262,+	0.0747952	0.0708094
hsa-miR-573	1	1	1	0.15	0.14	4:hsa;hsa-mir-573,24520207,24520230,-	0.14959	0.141619
hsa-miR-7-2-3p	1	1	1	0.15	0.14	15:hsa;hsa-mir-7-2,88611896,88611917,+	0.14959	0.141619
hsa-miR-3187-5p	1	1	1	0.15	0.14	19:hsa;hsa-mir-3187,813590,813612,+	0.14959	0.141619
hsa-miR-3152-5p	1	1	1	0.15	0.14	9:hsa;hsa-mir-3152,18573316,18573337,+	0.14959	0.141619
hsa-miR-4449	1	1	1	0.15	0.14	4:hsa;hsa-mir-4449,52712720,52712741,+	0.14959	0.141619
hsa-miR-4728-3p	1	1	1	0.15	0.14	17:hsa;hsa-mir-4728,39726537,39726561,+	0.14959	0.141619
hsv1-miR-H13	1	1	0.5	0.15	0.14	NC_001806;hsv1-mir-H13,132009,132031,+	0.0747952	0.0708094
hsa-miR-3120-3p	1	1	1	0.15	0.14	1:hsa;hsa-mir-3120,172138858,172138878,+	0.14959	0.141619
hsa-miR-4659a-5p	1	1	1	0.15	0.14	8:hsa;hsa-mir-4659a,6745177,6745198,+	0.14959	0.141619
hsa-miR-4659a-3p	1	1	1	0.15	0.14	8:hsa;hsa-mir-4659a,6745212,6745233,+	0.14959	0.141619
hsa-miR-6819-3p	1	1	1	0.15	0.14	22:hsa;hsa-mir-6819,36286887,36286907,-	0.14959	0.141619
hsa-miR-4707-5p	1	1	1	0.15	0.14	14:hsa;hsa-mir-4707,22956959,22956981,-	0.14959	0.141619
hsa-miR-4707-3p	1	1	1	0.15	0.14	14:hsa;hsa-mir-4707,22957001,22957022,-	0.14959	0.141619
hsa-miR-3943	1	1	1	0.15	0.14	7:hsa;hsa-mir-3943,43150917,43150939,+	0.14959	0.141619
hsa-miR-300	1	1	0.5	0.15	0.14	14:hsa;hsa-mir-300,101041414,101041435,+	0.0747952	0.0708094
hsa-miR-1269b	1	1	1	0.15	0.14	17:hsa;hsa-mir-1269b,12917276,12917297,-	0.14959	0.141619
hsa-miR-6859-3p	1	1	0.06	0.15	0.14	15:hsa;hsa-mir-6859-3,101973569,101973591,+	0.0093494	0.00885117
hsa-miR-6859-3p	1	1	0.06	0.15	0.14	15:hsa;hsa-mir-6859-1,101973569,101973591,+	0.0093494	0.00885117
hsa-miR-3609	1	1	1	0.15	0.14	7:hsa;hsa-mir-3609,98881700,98881723,+	0.14959	0.141619
hsa-miR-6859-3p	1	1	0.06	0.15	0.14	1:hsa;hsa-mir-6859-2,187936,187958,-	0.0093494	0.00885117
hsa-miR-6859-3p	1	1	0.06	0.15	0.14	1:hsa;hsa-mir-6859-3,187936,187958,-	0.0093494	0.00885117
hsa-miR-3154	1	1	1	0.15	0.14	9:hsa;hsa-mir-3154,128245000,128245021,-	0.14959	0.141619
hsa-miR-766-5p	1	1	1	0.15	0.14	X:hsa;hsa-mir-766,119646766,119646787,-	0.14959	0.141619
hsa-miR-5697	1	1	1	0.15	0.14	1:hsa;hsa-mir-5697,9967390,9967411,+	0.14959	0.141619
hsa-miR-548i	1	1	0.25	0.15	0.14	8:hsa;hsa-mir-548i-3,8088979,8089000,-	0.0373976	0.0354047
hsa-miR-9-3p	1	1	0.5	0.15	0.14	1:hsa;hsa-mir-9-1,156420395,156420416,-	0.0747952	0.0708094

## Sheet: 10h-hsa
Table S3: Human (hsa-) and herpes simplex virus 1 (hsv1-) mature miRNAs detected in mock samples, and at 10 h.p.i., and 24 h.p.i.
HFF 10 h.p.i. - human miRNAs
name	unique reads	read count	read count (mult. map. adj.)	RPM (lib)	RPM (total)	coordinateString	RPM_adj (lib)	RPM_adj (total)
hsa-miR-22-3p	299	927604	927604	138761	131366	17:hsa;hsa-mir-22,1713955,1713976,-	138761	131366
hsa-miR-21-5p	667	690086	690086	103230	97729.1	17:hsa;hsa-mir-21,59841273,59841294,+	103230	97729.1
hsa-miR-143-3p	736	462522	462522	69188.9	65501.8	5:hsa;hsa-mir-143,149428978,149428998,+	69188.9	65501.8
hsa-miR-27b-3p	719	451974	451148	67611	64008	9:hsa;hsa-mir-27b,95085505,95085525,+	67487.5	63891
hsa-miR-26a-5p	548	424653	212412	63524	60138.8	12:hsa;hsa-mir-26a-2,57824622,57824643,-	31774.8	30081.5
hsa-miR-26a-5p	531	424530	212289	63505.6	60121.4	3:hsa;hsa-mir-26a-1,37969413,37969434,+	31756.4	30064.1
hsa-let-7f-5p	387	383289	198623	57336.4	54280.9	X:hsa;hsa-let-7f-2,53557199,53557220,-	29712.1	28128.7
hsa-let-7f-5p	323	370587	185925	55436.3	52482.1	9:hsa;hsa-let-7f-1,94176353,94176374,+	27812.6	26330.5
hsa-miR-181a-5p	468	356508	178256	53330.2	50488.2	1:hsa;hsa-mir-181a-1,198859067,198859089,-	26665.4	25244.4
hsa-miR-181a-5p	467	356504	178252	53329.6	50487.6	9:hsa;hsa-mir-181a-2,124692480,124692502,+	26664.8	25243.8
hsa-let-7a-5p	436	349559	117079	52290.7	49504.1	22:hsa;hsa-let-7a-3,46112752,46112773,+	17513.9	16580.6
hsa-let-7a-5p	446	349417	116917	52269.4	49484	11:hsa;hsa-let-7a-2,122146526,122146547,-	17489.6	16557.6
hsa-let-7a-5p	429	348726	116225	52166.1	49386.1	9:hsa;hsa-let-7a-1,94175962,94175983,+	17386.1	16459.6
hsa-miR-199a-3p	852	244283	82749.8	36542.4	34595	1:hsa;hsa-mir-199a-2,172144604,172144625,-	12378.6	11718.9
hsa-miR-199b-3p	778	242386	80814.8	36258.6	34326.4	9:hsa;hsa-mir-199b,128244785,128244806,-	12089.1	11444.9
hsa-miR-199a-3p	764	242360	80799.3	36254.7	34322.7	19:hsa;hsa-mir-199a-1,10817472,10817493,-	12086.8	11442.7
hsa-miR-127-3p	1278	235085	235085	35166.5	33292.4	14:hsa;hsa-mir-127,100883035,100883056,+	35166.5	33292.4
hsa-miR-222-3p	504	167577	167577	25067.9	23732	X:hsa;hsa-mir-222,45747083,45747103,-	25067.9	23732
hsa-let-7i-5p	338	163867	163702	24512.9	23206.6	12:hsa;hsa-let-7i,62603691,62603712,+	24488.3	23183.3
hsa-miR-191-5p	262	125849	125849	18825.8	17822.6	3:hsa;hsa-mir-191,49020633,49020655,-	18825.8	17822.6
hsa-miR-30a-5p	379	95016	94986	14213.5	13456	6:hsa;hsa-mir-30a,71403556,71403577,-	14209	13451.8
hsa-miR-92a-3p	704	92786	49626.5	13879.9	13140.2	13:hsa;hsa-mir-92a-1,91351361,91351382,+	7423.65	7028.04
hsa-miR-92a-3p	637	87953	44793.5	13156.9	12455.8	X:hsa;hsa-mir-92a-2,134169585,134169606,-	6700.68	6343.6
hsa-miR-16-5p	160	78281	39204.5	11710.1	11086	3:hsa;hsa-mir-16-2,160404754,160404775,+	5864.62	5552.09
hsa-miR-16-5p	158	78203	39126.5	11698.4	11075	13:hsa;hsa-mir-16-1,50048986,50049007,-	5852.95	5541.04
hsa-miR-151a-3p	559	74239	74239	11105.4	10513.6	8:hsa;hsa-mir-151a,140732610,140732630,-	11105.4	10513.6
hsa-miR-31-5p	219	61904	61904	9260.25	8766.76	9:hsa;hsa-mir-31,21512122,21512142,-	9260.25	8766.76
hsa-miR-100-5p	278	56570	56527	8462.33	8011.37	11:hsa;hsa-mir-100,122152241,122152262,-	8455.9	8005.28
hsa-miR-221-3p	400	53479	53479	7999.95	7573.63	X:hsa;hsa-mir-221,45746221,45746243,-	7999.95	7573.63
hsa-miR-29a-3p	357	52373	52368.8	7834.5	7417	7:hsa;hsa-mir-29a,130876788,130876809,-	7833.88	7416.41
hsa-miR-411-5p	188	52305	52305	7824.33	7407.37	14:hsa;hsa-mir-411,101023340,101023360,+	7824.33	7407.37
hsa-miR-30d-5p	285	47967	47936	7175.4	6793.02	8:hsa;hsa-mir-30d,134804881,134804902,-	7170.77	6788.63
hsa-miR-27a-3p	361	42703	41921.8	6387.96	6047.54	19:hsa;hsa-mir-27a,13836490,13836510,-	6271.11	5936.92
hsa-miR-181b-5p	376	39235	20027	5869.18	5556.41	9:hsa;hsa-mir-181b-2,124693725,124693747,+	2995.85	2836.2
hsa-miR-181b-5p	378	39187	19979	5862	5549.61	1:hsa;hsa-mir-181b-1,198858908,198858930,-	2988.67	2829.4
hsa-miR-28-3p	176	38645	38645	5780.92	5472.85	3:hsa;hsa-mir-28,188688834,188688855,+	5780.92	5472.85
hsa-let-7b-5p	402	37870	36619.3	5664.99	5363.1	22:hsa;hsa-let-7b,46113691,46113712,+	5477.9	5185.99
hsa-miR-151a-5p	101	37748	37296.5	5646.74	5345.82	8:hsa;hsa-mir-151a,140732574,140732594,-	5579.2	5281.88
hsa-miR-103a-3p	355	34094	16455.3	5100.14	4828.35	20:hsa;hsa-mir-103a-2,3917541,3917563,+	2461.56	2330.38
hsa-miR-103a-3p	345	33970	16331.8	5081.59	4810.79	5:hsa;hsa-mir-103a-1,168560943,168560965,-	2443.09	2312.89
hsa-miR-30e-5p	238	32105	32091	4802.6	4546.67	1:hsa;hsa-mir-30e,40754371,40754392,+	4800.51	4544.69
hsa-miR-125b-5p	224	32056	16107	4795.27	4539.73	11:hsa;hsa-mir-125b-1,122099771,122099792,-	2409.45	2281.05
hsa-miR-125b-5p	222	32002	16053	4787.19	4532.08	21:hsa;hsa-mir-125b-2,16590253,16590274,+	2401.38	2273.41
hsa-miR-654-3p	326	30843	30843	4613.82	4367.95	14:hsa;hsa-mir-654,101040269,101040290,+	4613.82	4367.95
hsa-let-7g-5p	197	30403	30131.7	4548	4305.63	3:hsa;hsa-let-7g,52268282,52268303,-	4507.41	4267.21
hsa-miR-92b-3p	762	27712	27712	4145.45	3924.54	1:hsa;hsa-mir-92b,155195237,155195258,+	4145.45	3924.54
hsa-miR-409-3p	355	26892	26892	4022.79	3808.41	14:hsa;hsa-mir-409,101065346,101065367,+	4022.79	3808.41
hsa-miR-26b-5p	192	26097	26095	3903.86	3695.82	2:hsa;hsa-mir-26b,218402657,218402677,+	3903.56	3695.54
hsa-miR-186-5p	200	25629	25629	3833.85	3629.55	1:hsa;hsa-mir-186,71067645,71067666,-	3833.85	3629.55
hsa-miR-199b-5p	194	22612	22598	3382.54	3202.28	9:hsa;hsa-mir-199b,128244746,128244768,-	3380.44	3200.3
hsa-miR-130a-3p	222	19048	19047.5	2849.4	2697.55	11:hsa;hsa-mir-130a,57641252,57641273,+	2849.32	2697.48
hsa-miR-381-3p	129	18542	18541.5	2773.71	2625.89	14:hsa;hsa-mir-381,101045968,101045989,+	2773.63	2625.82
hsa-let-7d-5p	151	18332	18019.2	2742.29	2596.15	9:hsa;hsa-let-7d,94178841,94178862,+	2695.49	2551.85
hsa-miR-25-3p	156	16509	16509	2469.59	2337.98	7:hsa;hsa-mir-25,100093611,100093632,-	2469.59	2337.98
hsa-miR-199a-5p	197	15350	7672.5	2296.21	2173.85	19:hsa;hsa-mir-199a-1,10817431,10817453,-	1147.73	1086.57
hsa-miR-199a-5p	196	15348	7670.5	2295.91	2173.56	1:hsa;hsa-mir-199a-2,172144565,172144587,-	1147.43	1086.29
hsa-miR-125a-5p	154	14091	14091	2107.88	1995.55	19:hsa;hsa-mir-125a,51693268,51693291,+	2107.88	1995.55
hsa-miR-423-5p	205	13821	13821	2067.49	1957.31	17:hsa;hsa-mir-423,30117095,30117117,+	2067.49	1957.31
hsa-miR-23a-3p	201	12934	12861	1934.8	1831.7	19:hsa;hsa-mir-23a,13836631,13836651,-	1923.88	1821.36
hsa-miR-155-5p	217	12468	12468	1865.09	1765.7	21:hsa;hsa-mir-155,25573983,25574006,+	1865.09	1765.7
hsa-miR-23b-3p	225	12028	11955	1799.27	1703.39	9:hsa;hsa-mir-23b,95085265,95085287,+	1788.35	1693.05
hsa-miR-423-3p	277	11528	11528	1724.48	1632.58	17:hsa;hsa-mir-423,30117131,30117153,+	1724.48	1632.58
hsa-let-7e-5p	185	11373	11197	1701.29	1610.63	19:hsa;hsa-let-7e,51692793,51692814,+	1674.97	1585.71
hsa-miR-101-3p	224	10420	5286.5	1558.73	1475.67	9:hsa;hsa-mir-101-2,4850345,4850365,+	790.81	748.667
hsa-miR-99b-5p	173	10369	10369	1551.1	1468.44	19:hsa;hsa-mir-99b,51692618,51692639,+	1551.1	1468.44
hsa-miR-101-3p	214	10273	5139.5	1536.74	1454.85	1:hsa;hsa-mir-101-1,65058480,65058500,-	768.82	727.849
hsa-miR-10b-5p	131	10225	10147.5	1529.56	1448.05	2:hsa;hsa-mir-10b,176150329,176150351,+	1517.97	1437.08
hsa-miR-181c-5p	117	10207	10207	1526.87	1445.5	19:hsa;hsa-mir-181c,13874725,13874746,+	1526.87	1445.5
hsa-miR-196a-5p	135	9611	7922.33	1437.71	1361.1	12:hsa;hsa-mir-196a-2,53991762,53991783,+	1185.11	1121.95
hsa-let-7c-5p	145	9464	9085.35	1415.72	1340.28	21:hsa;hsa-let-7c,16539838,16539859,+	1359.08	1286.66
hsa-miR-125b-1-3p	217	8979	8979	1343.17	1271.59	11:hsa;hsa-mir-125b-1,122099811,122099832,-	1343.17	1271.59
hsa-miR-196b-5p	159	8658	8656.33	1295.15	1226.13	7:hsa;hsa-mir-196b,27169494,27169515,-	1294.9	1225.9
hsa-miR-148b-3p	135	8432	8430.5	1261.35	1194.13	12:hsa;hsa-mir-148b,54337278,54337299,+	1261.12	1193.92
hsa-miR-152-3p	202	8118	8118	1214.38	1149.66	17:hsa;hsa-mir-152,48037214,48037234,-	1214.38	1149.66
hsa-miR-431-5p	73	7633	7633	1141.82	1080.98	14:hsa;hsa-mir-431,100881026,100881046,+	1141.82	1080.98
hsa-miR-21-3p	137	7609	7609	1138.23	1077.58	17:hsa;hsa-mir-21,59841311,59841331,+	1138.23	1077.58
hsa-miR-410-3p	62	7269	7269	1087.37	1029.43	14:hsa;hsa-mir-410,101065961,101065981,+	1087.37	1029.43
hsa-miR-493-5p	104	7248	7248	1084.23	1026.45	14:hsa;hsa-mir-493,100869075,100869096,+	1084.23	1026.45
hsa-miR-24-3p	141	6946	3506.5	1039.06	983.68	9:hsa;hsa-mir-24-1,95086064,95086085,+	524.539	496.586
hsa-miR-192-5p	141	6931	6931	1036.81	981.56	11:hsa;hsa-mir-192,64891160,64891180,-	1036.81	981.559
hsa-miR-24-3p	126	6879	3439.5	1029.03	974.2	19:hsa;hsa-mir-24-2,13836336,13836357,-	514.516	487.098
hsa-miR-98-5p	91	6733	6686.05	1007.19	953.52	X:hsa;hsa-mir-98,53556244,53556265,-	1000.17	946.87
hsa-miR-28-5p	68	6644	6644	993.88	940.91	3:hsa;hsa-mir-28,188688794,188688815,+	993.879	940.915
hsa-miR-136-3p	91	6614	6614	989.39	936.67	14:hsa;hsa-mir-136,100884750,100884771,+	989.391	936.666
hsa-miR-107	148	6161	3487.83	921.63	872.51	10:hsa;hsa-mir-107,89592796,89592818,-	521.747	493.942
hsa-miR-148a-3p	94	6139	6137.5	918.34	869.4	7:hsa;hsa-mir-148a,25949962,25949983,-	918.111	869.185
hsa-miR-301a-3p	65	6079	6079	909.36	860.9	17:hsa;hsa-mir-301a,59151186,59151208,-	909.36	860.9
hsa-miR-181a-2-3p	120	5531	5531	827.38	783.29	9:hsa;hsa-mir-181a-2,124692518,124692539,+	827.385	783.293
hsa-miR-320a-3p	281	5460	5125.15	816.76	773.24	8:hsa;hsa-mir-320a,22245007,22245028,-	766.673	725.816
hsa-miR-146b-5p	83	4914	4914	735.09	695.91	10:hsa;hsa-mir-146b,102436520,102436542,+	735.087	695.914
hsa-miR-769-5p	66	4818	4818	720.73	682.32	19:hsa;hsa-mir-769,46018961,46018982,+	720.727	682.319
hsa-miR-30c-5p	74	4804	2402.33	718.63	680.34	1:hsa;hsa-mir-30c-1,40757300,40757322,+	359.366	340.215
hsa-miR-30c-5p	73	4803	2401.33	718.48	680.19	6:hsa;hsa-mir-30c-2,71376966,71376988,-	359.217	340.074
hsa-miR-130b-3p	116	4300	4299.5	643.24	608.96	22:hsa;hsa-mir-130b,21653354,21653375,+	643.164	608.89
hsa-miR-34c-5p	53	4168	4168	623.49	590.27	11:hsa;hsa-mir-34c,111513451,111513473,+	623.493	590.267
hsa-miR-196a-5p	86	4123	2435.33	616.76	583.89	17:hsa;hsa-mir-196a-1,48632496,48632517,-	364.303	344.889
hsa-miR-132-3p	107	4050	4050	605.84	573.56	17:hsa;hsa-mir-132,2049966,2049987,-	605.841	573.556
hsa-miR-140-3p	156	3837	3837	573.98	543.39	16:hsa;hsa-mir-140,69933142,69933162,+	573.979	543.391
hsa-miR-93-5p	111	3761	3761	562.61	532.63	7:hsa;hsa-mir-93,100093778,100093800,-	562.61	532.628
hsa-miR-744-5p	62	3544	3544	530.15	501.9	17:hsa;hsa-mir-744,12081909,12081930,+	530.149	501.897
hsa-miR-30b-5p	44	3472	3471.33	519.38	491.7	8:hsa;hsa-mir-30b,134800536,134800557,-	519.278	491.606
hsa-miR-493-3p	76	3434	3434	513.69	486.32	14:hsa;hsa-mir-493,100869116,100869137,+	513.694	486.319
hsa-miR-128-3p	100	3166	1776.5	473.6	448.36	2:hsa;hsa-mir-128-1,135665446,135665466,+	265.747	251.586
hsa-miR-221-5p	82	3007	3007	449.82	425.85	X:hsa;hsa-mir-221,45746181,45746202,-	449.818	425.847
hsa-miR-15a-5p	56	3006	3006	449.67	425.71	13:hsa;hsa-mir-15a,50049132,50049153,-	449.669	425.706
hsa-miR-128-3p	85	2818	1428.5	421.55	399.08	3:hsa;hsa-mir-128-2,35744527,35744547,+	213.69	202.302
hsa-miR-224-5p	78	2755	2755	412.12	390.16	X:hsa;hsa-mir-224,151958584,151958608,-	412.122	390.16
hsa-miR-345-5p	68	2735	2735	409.13	387.33	14:hsa;hsa-mir-345,100307876,100307897,+	409.13	387.327
hsa-miR-455-5p	79	2663	2663	398.36	377.13	9:hsa;hsa-mir-455,114209449,114209470,+	398.359	377.131
hsa-miR-486-5p	132	2535	1333	379.21	359	8:hsa;hsa-mir-486-2,41660444,41660465,+	199.404	188.778
hsa-miR-15b-5p	42	2504	2504	374.57	354.61	3:hsa;hsa-mir-15b,160404607,160404628,+	374.574	354.613
hsa-miR-486-5p	118	2437	1235	364.55	345.12	8:hsa;hsa-mir-486-1,41660444,41660465,-	184.744	174.899
hsa-miR-19b-3p	37	2435	1226.83	364.25	344.84	X:hsa;hsa-mir-19b-2,134169732,134169754,-	183.523	173.743
hsa-miR-19b-3p	37	2419	1210.83	361.86	342.58	13:hsa;hsa-mir-19b-1,91351245,91351267,+	181.129	171.477
hsa-miR-27b-5p	48	2240	2240	335.08	317.23	9:hsa;hsa-mir-27b,95085463,95085484,+	335.083	317.226
hsa-miR-889-3p	40	2161	2161	323.26	306.04	14:hsa;hsa-mir-889,101047949,101047969,+	323.265	306.038
hsa-miR-425-5p	72	2107	2107	315.19	298.39	3:hsa;hsa-mir-425,49020161,49020183,-	315.187	298.391
hsa-miR-487b-3p	82	2076	2076	310.55	294	14:hsa;hsa-mir-487b,101046505,101046526,+	310.55	294
hsa-miR-99a-5p	55	2040	2002	305.16	288.9	21:hsa;hsa-mir-99a,16539101,16539122,+	299.48	283.521
hsa-miR-378a-3p	54	2033	2013.75	304.12	287.91	5:hsa;hsa-mir-378a,149732867,149732888,+	301.238	285.185
hsa-miR-340-5p	46	1997	1997	298.73	282.81	5:hsa;hsa-mir-340,180015318,180015339,-	298.732	282.813
hsa-miR-369-5p	27	1841	1841	275.4	260.72	14:hsa;hsa-mir-369,101065606,101065627,+	275.396	260.72
hsa-miR-182-5p	71	1811	1811	270.91	256.47	7:hsa;hsa-mir-182,129770405,129770428,-	270.908	256.471
hsa-miR-145-5p	58	1810	1810	270.76	256.33	5:hsa;hsa-mir-145,149430661,149430683,+	270.759	256.33
hsa-miR-181d-5p	73	1746	1742	261.18	247.27	19:hsa;hsa-mir-181d,13874910,13874932,+	260.587	246.7
hsa-miR-181a-3p	48	1669	1668	249.67	236.36	1:hsa;hsa-mir-181a-1,198859107,198859128,-	249.517	236.22
hsa-miR-218-5p	53	1594	814	238.45	225.74	4:hsa;hsa-mir-218-1,20528299,20528319,+	121.767	115.278
hsa-miR-134-5p	108	1570	1570	234.86	222.34	14:hsa;hsa-mir-134,101054694,101054715,+	234.857	222.341
hsa-miR-424-5p	38	1570	1570	234.86	222.34	X:hsa;hsa-mir-424,134546624,134546645,-	234.857	222.341
hsa-miR-218-5p	48	1562	782	233.66	221.21	5:hsa;hsa-mir-218-2,168768170,168768190,-	116.98	110.746
hsa-miR-30a-3p	63	1553	1552.5	232.31	219.93	6:hsa;hsa-mir-30a,71403597,71403618,-	232.239	219.863
hsa-miR-484	70	1553	1553	232.31	219.93	16:hsa;hsa-mir-484,15643301,15643322,+	232.314	219.934
hsa-miR-299-3p	51	1509	1509	225.73	213.7	14:hsa;hsa-mir-299,101023832,101023853,+	225.732	213.703
hsa-miR-30e-3p	47	1471	1471	220.05	208.32	1:hsa;hsa-mir-30e,40754413,40754434,+	220.048	208.321
hsa-miR-34a-5p	74	1328	1328	198.66	188.07	1:hsa;hsa-mir-34a,9151689,9151710,-	198.656	188.07
hsa-miR-424-3p	63	1312	1312	196.26	185.8	X:hsa;hsa-mir-424,134546661,134546681,-	196.263	185.804
hsa-miR-432-5p	124	1301	1301	194.62	184.25	14:hsa;hsa-mir-432,100884496,100884518,+	194.617	184.246
hsa-miR-181c-3p	46	1300	1299	194.47	184.1	19:hsa;hsa-mir-181c,13874763,13874784,+	194.318	183.963
hsa-miR-450b-5p	40	1244	1244	186.09	176.17	X:hsa;hsa-mir-450b,134540195,134540216,-	186.091	176.174
hsa-miR-106b-3p	84	1214	1214	181.6	171.93	7:hsa;hsa-mir-106b,100094044,100094065,-	181.603	171.925
hsa-miR-549a-5p	26	1211	1211	181.15	171.5	15:hsa;hsa-mir-549a,80842005,80842026,-	181.154	171.5
hsa-miR-574-3p	64	1198	1198	179.21	169.66	4:hsa;hsa-mir-574,38868092,38868113,+	179.209	169.659
hsa-miR-126-5p	26	1186	1186	177.41	167.96	9:hsa;hsa-mir-126,136670616,136670636,+	177.414	167.96
hsa-miR-454-3p	50	1141	1141	170.68	161.59	17:hsa;hsa-mir-454,59137821,59137843,-	170.683	161.587
hsa-miR-542-3p	70	1139	1139	170.38	161.3	X:hsa;hsa-mir-542,134541393,134541414,-	170.384	161.304
hsa-miR-370-3p	138	1118	1118	167.24	158.33	14:hsa;hsa-mir-370,100911186,100911207,+	167.242	158.33
hsa-miR-335-3p	52	1117	1117	167.09	158.19	7:hsa;hsa-mir-335,130496162,130496183,+	167.093	158.188
hsa-miR-887-3p	75	1111	1111	166.19	157.34	5:hsa;hsa-mir-887,15935229,15935250,+	166.195	157.338
hsa-miR-421	68	1084	1084	162.16	153.51	X:hsa;hsa-mir-421,74218424,74218446,-	162.156	153.515
hsa-miR-361-5p	54	1076	1076	160.96	152.38	X:hsa;hsa-mir-361,85903641,85903662,-	160.959	152.382
hsa-miR-136-5p	36	1074	1074	160.66	152.1	14:hsa;hsa-mir-136,100884716,100884738,+	160.66	152.098
hsa-miR-204-5p	32	1027	1027	153.63	145.44	9:hsa;hsa-mir-204,70810007,70810028,-	153.629	145.442
hsa-miR-214-5p	32	1023	1023	153.03	144.88	1:hsa;hsa-mir-214,172138827,172138848,-	153.031	144.876
hsa-miR-374a-3p	24	1016	1016	151.98	143.88	X:hsa;hsa-mir-374a,74287327,74287348,-	151.984	143.885
hsa-miR-151b	28	1002	550.5	149.89	141.9	14:hsa;hsa-mir-151b,100109478,100109495,-	82.3495	77.9611
hsa-miR-138-5p	43	994	516.5	148.69	140.77	3:hsa;hsa-mir-138-1,44114234,44114256,+	77.2635	73.1461
hsa-miR-532-5p	64	987	987	147.65	139.78	X:hsa;hsa-mir-532,50003167,50003188,+	147.646	139.778
hsa-miR-138-5p	37	972	494.5	145.4	137.65	16:hsa;hsa-mir-138-2,56858527,56858549,+	73.9725	70.0305
hsa-miR-125b-2-3p	56	957	957	143.16	135.53	21:hsa;hsa-mir-125b-2,16590290,16590311,+	143.158	135.529
hsa-miR-210-3p	98	954	954	142.71	135.1	11:hsa;hsa-mir-210,568154,568175,-	142.709	135.104
hsa-miR-584-5p	67	941	941	140.76	133.26	5:hsa;hsa-mir-584,149062328,149062349,-	140.765	133.263
hsa-miR-130b-5p	24	940	940	140.62	133.12	22:hsa;hsa-mir-130b,21653316,21653336,+	140.615	133.122
hsa-miR-339-3p	59	934	934	139.72	132.27	7:hsa;hsa-mir-339,1022982,1023004,-	139.717	132.272
hsa-miR-301b-3p	25	906	906	135.53	128.31	22:hsa;hsa-mir-301b,21653025,21653047,+	135.529	128.307
hsa-miR-450a-5p	39	903	453.5	135.08	127.88	X:hsa;hsa-mir-450a-1,134540358,134540379,-	67.8393	64.2241
hsa-miR-450a-5p	38	901	451.5	134.78	127.6	X:hsa;hsa-mir-450a-2,134540530,134540551,-	67.5401	63.9408
hsa-miR-193a-3p	25	899	899	134.48	127.32	17:hsa;hsa-mir-193a,31560050,31560071,+	134.482	127.315
hsa-miR-342-3p	51	851	851	127.3	120.52	14:hsa;hsa-mir-342,100109715,100109737,+	127.301	120.518
hsa-miR-214-3p	136	850	850	127.15	120.38	1:hsa;hsa-mir-214,172138868,172138889,-	127.152	120.376
hsa-miR-24-2-5p	45	849	849	127	120.23	19:hsa;hsa-mir-24-2,13836299,13836320,-	127.002	120.234
hsa-miR-654-5p	55	785	785	117.43	111.17	14:hsa;hsa-mir-654,101040234,101040255,+	117.428	111.171
hsa-miR-1185-1-3p	47	775	755.5	115.93	109.75	14:hsa;hsa-mir-1185-1,101043029,101043050,+	113.016	106.993
hsa-miR-1468-5p	29	767	767	114.74	108.62	X:hsa;hsa-mir-1468,63786014,63786034,-	114.736	108.622
hsa-miR-127-5p	72	765	765	114.44	108.34	14:hsa;hsa-mir-127,100883001,100883022,+	114.437	108.338
hsa-miR-758-3p	42	761	761	113.84	107.77	14:hsa;hsa-mir-758,101026071,101026092,+	113.838	107.772
hsa-miR-29c-3p	73	756	752.5	113.09	107.06	1:hsa;hsa-mir-29c,207801905,207801926,-	112.567	106.568
hsa-miR-376a-5p	24	742	742	111	105.08	14:hsa;hsa-mir-376a-1,101040788,101040809,+	110.996	105.081
hsa-miR-365a-3p	38	741	370.5	110.85	104.94	16:hsa;hsa-mir-365a,14309340,14309361,+	55.4233	52.4697
hsa-miR-365b-3p	38	741	370.5	110.85	104.94	17:hsa;hsa-mir-365b,31575478,31575499,+	55.4233	52.4697
hsa-miR-335-5p	19	726	726	108.6	102.82	7:hsa;hsa-mir-335,130496126,130496148,+	108.603	102.815
hsa-miR-145-3p	73	726	726	108.6	102.82	5:hsa;hsa-mir-145,149430699,149430720,+	108.603	102.815
hsa-miR-106b-5p	66	724	723.5	108.3	102.53	7:hsa;hsa-mir-106b,100094004,100094024,-	108.229	102.461
hsa-miR-10a-5p	46	699	616.5	104.56	98.99	17:hsa;hsa-mir-10a,48579859,48579881,-	92.2225	87.3079
hsa-miR-941	31	677	39.82	101.27	95.88	20:hsa;hsa-mir-941-2,63919802,63919824,+	5.95722	5.63976
hsa-miR-941	31	677	39.82	101.27	95.88	20:hsa;hsa-mir-941-3,63919607,63919629,+	5.95722	5.63976
hsa-miR-941	31	677	39.82	101.27	95.88	20:hsa;hsa-mir-941-5,63919802,63919824,+	5.95722	5.63976
hsa-miR-941	31	677	39.82	101.27	95.88	20:hsa;hsa-mir-941-1,63919495,63919517,+	5.95722	5.63976
hsa-miR-941	31	677	39.82	101.27	95.88	20:hsa;hsa-mir-941-2,63919914,63919936,+	5.95722	5.63976
hsa-miR-941	31	677	39.82	101.27	95.88	20:hsa;hsa-mir-941-3,63919914,63919936,+	5.95722	5.63976
hsa-miR-941	31	677	39.82	101.27	95.88	20:hsa;hsa-mir-941-5,63919551,63919573,+	5.95722	5.63976
hsa-miR-941	31	677	39.82	101.27	95.88	20:hsa;hsa-mir-941-2,63919607,63919629,+	5.95722	5.63976
hsa-miR-941	31	677	39.82	101.27	95.88	20:hsa;hsa-mir-941-2,63919551,63919573,+	5.95722	5.63976
hsa-miR-941	31	677	39.82	101.27	95.88	20:hsa;hsa-mir-941-4,63919914,63919936,+	5.95722	5.63976
hsa-miR-941	31	677	39.82	101.27	95.88	20:hsa;hsa-mir-941-4,63919607,63919629,+	5.95722	5.63976
hsa-miR-941	31	677	39.82	101.27	95.88	20:hsa;hsa-mir-941-3,63919551,63919573,+	5.95722	5.63976
hsa-miR-941	31	677	39.82	101.27	95.88	20:hsa;hsa-mir-941-3,63919802,63919824,+	5.95722	5.63976
hsa-miR-941	31	677	39.82	101.27	95.88	20:hsa;hsa-mir-941-4,63919802,63919824,+	5.95722	5.63976
hsa-miR-941	31	677	39.82	101.27	95.88	20:hsa;hsa-mir-941-5,63919607,63919629,+	5.95722	5.63976
hsa-miR-941	31	677	39.82	101.27	95.88	20:hsa;hsa-mir-941-5,63919914,63919936,+	5.95722	5.63976
hsa-miR-941	31	677	39.82	101.27	95.88	20:hsa;hsa-mir-941-4,63919551,63919573,+	5.95722	5.63976
hsa-miR-17-5p	38	667	664	99.78	94.46	13:hsa;hsa-mir-17,91350618,91350640,+	99.3281	94.0348
hsa-miR-382-5p	33	646	646	96.64	91.49	14:hsa;hsa-mir-382,101054316,101054337,+	96.6354	91.4857
hsa-miR-1307-5p	32	637	637	95.29	90.21	10:hsa;hsa-mir-1307,103394293,103394313,-	95.2891	90.2111
hsa-miR-411-3p	29	629	628.5	94.09	89.08	14:hsa;hsa-mir-411,101023375,101023396,+	94.0176	89.0074
hsa-miR-671-3p	74	619	619	92.6	87.66	7:hsa;hsa-mir-671,151238488,151238508,+	92.5965	87.662
hsa-miR-320b	58	607	216.15	90.8	85.96	1:hsa;hsa-mir-320b-2,224257080,224257101,-	32.3333	30.6102
hsa-miR-132-5p	27	605	605	90.5	85.68	17:hsa;hsa-mir-132,2049930,2049951,-	90.5022	85.6793
hsa-miR-376c-3p	43	602	602	90.05	85.25	14:hsa;hsa-mir-376c,101039732,101039752,+	90.0534	85.2545
hsa-miR-19a-3p	24	601	600.33	89.9	85.11	13:hsa;hsa-mir-19a,91350939,91350961,+	89.8041	85.0184
hsa-miR-320b	52	601	212.15	89.9	85.11	1:hsa;hsa-mir-320b-1,116671787,116671808,+	31.7349	30.0437
hsa-miR-660-5p	36	596	596	89.16	84.4	X:hsa;hsa-mir-660,50013256,50013277,+	89.1559	84.4047
hsa-miR-29b-3p	41	582	293.83	87.06	82.42	1:hsa;hsa-mir-29b-2,207802494,207802516,-	43.9547	41.6123
hsa-miR-29b-3p	40	578	289.83	86.46	81.86	7:hsa;hsa-mir-29b-1,130877509,130877531,-	43.3563	41.0458
hsa-miR-3615	46	574	574	85.86	81.29	17:hsa;hsa-mir-3615,74748663,74748683,+	85.8649	81.2891
hsa-miR-361-3p	43	563	563	84.22	79.73	X:hsa;hsa-mir-361,85903680,85903702,-	84.2194	79.7313
hsa-miR-1307-3p	59	560	560	83.77	79.31	10:hsa;hsa-mir-1307,103394332,103394353,-	83.7706	79.3065
hsa-miR-374a-5p	19	552	551.5	82.57	78.17	X:hsa;hsa-mir-374a,74287297,74287318,-	82.4991	78.1027
hsa-miR-212-3p	40	548	548	81.98	77.61	17:hsa;hsa-mir-212,2050341,2050361,-	81.9756	77.6071
hsa-miR-543	42	533	533	79.73	75.48	14:hsa;hsa-mir-543,101032033,101032054,+	79.7317	75.4828
hsa-miR-149-5p	38	524	524	78.39	74.21	2:hsa;hsa-mir-149,240456015,240456037,+	78.3854	74.2082
hsa-miR-369-3p	27	512	512	76.59	72.51	14:hsa;hsa-mir-369,101065641,101065661,+	76.5903	72.5088
hsa-miR-100-3p	22	512	512	76.59	72.51	11:hsa;hsa-mir-100,122152276,122152297,-	76.5903	72.5088
hsa-miR-539-3p	34	511	511	76.44	72.37	14:hsa;hsa-mir-539,101047369,101047390,+	76.4407	72.3672
hsa-miR-16-2-3p	31	509	509	76.14	72.08	3:hsa;hsa-mir-16-2,160404797,160404818,+	76.1415	72.0839
hsa-miR-148b-5p	26	497	497	74.35	70.38	12:hsa;hsa-mir-148b,54337240,54337261,+	74.3465	70.3845
hsa-miR-331-3p	44	485	485	72.55	68.69	12:hsa;hsa-mir-331,95308480,95308500,+	72.5514	68.6851
hsa-miR-494-3p	33	482	482	72.1	68.26	14:hsa;hsa-mir-494,101029681,101029702,+	72.1026	68.2602
hsa-miR-452-5p	39	479	479	71.65	67.84	X:hsa;hsa-mir-452,151959641,151959662,-	71.6538	67.8354
hsa-miR-337-3p	42	461	461	68.96	65.29	14:hsa;hsa-mir-337,100874553,100874574,+	68.9612	65.2862
hsa-miR-1304-3p	27	461	461	68.96	65.29	11:hsa;hsa-mir-1304,93733726,93733747,-	68.9612	65.2862
hsa-miR-500a-3p	36	443	378	66.27	62.74	X:hsa;hsa-mir-500a,50008482,50008503,+	56.5452	53.5319
hsa-miR-561-5p	19	428	428	64.02	60.61	2:hsa;hsa-mir-561,188297517,188297538,+	64.0247	60.6128
hsa-miR-99b-3p	53	418	418	62.53	59.2	19:hsa;hsa-mir-99b,51692656,51692677,+	62.5288	59.1966
hsa-miR-490-3p	44	408	408	61.03	57.78	7:hsa;hsa-mir-490,136903242,136903263,+	61.0329	57.7804
hsa-miR-487a-3p	8	407	407	60.88	57.64	14:hsa;hsa-mir-487a,101052494,101052515,+	60.8833	57.6388
hsa-miR-7706	21	370	370	55.35	52.4	15:hsa;hsa-mir-7706,85380639,85380662,+	55.3485	52.3989
hsa-miR-193b-3p	64	369	369	55.2	52.26	16:hsa;hsa-mir-193b,14304017,14304038,+	55.1989	52.2573
hsa-miR-485-5p	16	364	364	54.45	51.55	14:hsa;hsa-mir-485,101055427,101055448,+	54.4509	51.5492
hsa-miR-379-3p	21	359	358.5	53.7	50.84	14:hsa;hsa-mir-379,101022109,101022130,+	53.6282	50.7703
hsa-miR-1260b	3	344	192	51.46	48.72	11:hsa;hsa-mir-1260b,96341447,96341465,+	28.7214	27.1908
hsa-miR-374b-5p	13	341	340.5	51.01	48.29	X:hsa;hsa-mir-374b,74218557,74218578,-	50.9355	48.2212
hsa-miR-323a-3p	30	332	332	49.66	47.02	14:hsa;hsa-mir-323a,101025782,101025802,+	49.664	47.0174
hsa-miR-1260a	11	330	178	49.36	46.73	14:hsa;hsa-mir-1260a,77266231,77266248,+	26.6271	25.2081
hsa-miR-455-3p	45	311	311	46.52	44.04	9:hsa;hsa-mir-455,114209487,114209507,+	46.5226	44.0434
hsa-miR-668-3p	37	294	294	43.98	41.64	14:hsa;hsa-mir-668,101055300,101055322,+	43.9796	41.6359
hsa-miR-615-3p	39	285	285	42.63	40.36	12:hsa;hsa-mir-615,54034010,54034031,+	42.6333	40.3613
hsa-miR-20a-5p	25	279	279	41.74	39.51	13:hsa;hsa-mir-20a,91351072,91351094,+	41.7357	39.5116
hsa-miR-589-5p	15	278	278	41.59	39.37	7:hsa;hsa-mir-589,5495842,5495863,-	41.5861	39.37
hsa-miR-548k	9	275	275	41.14	38.95	11:hsa;hsa-mir-548k,70283986,70284007,+	41.1374	38.9451
hsa-miR-377-5p	12	270	270	40.39	38.24	14:hsa;hsa-mir-377,101062056,101062077,+	40.3894	38.2371
hsa-miR-222-5p	30	268	268	40.09	37.95	X:hsa;hsa-mir-222,45747045,45747066,-	40.0902	37.9538
hsa-miR-29a-5p	21	266	266	39.79	37.67	7:hsa;hsa-mir-29a,130876750,130876771,-	39.7911	37.6706
hsa-miR-143-5p	27	265	265	39.64	37.53	5:hsa;hsa-mir-143,149428944,149428965,+	39.6415	37.529
hsa-miR-1287-5p	12	265	265	39.64	37.53	10:hsa;hsa-mir-1287,98395233,98395254,-	39.6415	37.529
hsa-miR-30c-2-3p	18	261	261	39.04	36.96	6:hsa;hsa-mir-30c-2,71377006,71377027,-	39.0431	36.9625
hsa-miR-877-5p	53	260	260	38.89	36.82	6:hsa;hsa-mir-877,30584332,30584351,+	38.8935	36.8209
hsa-miR-431-3p	39	250	250	37.4	35.4	14:hsa;hsa-mir-431,100881069,100881090,+	37.3976	35.4047
hsa-miR-126-3p	29	248	248	37.1	35.12	9:hsa;hsa-mir-126,136670653,136670674,+	37.0984	35.1214
hsa-miR-30d-3p	27	248	247.5	37.1	35.12	8:hsa;hsa-mir-30d,134804921,134804942,-	37.0236	35.0506
hsa-miR-377-3p	28	240	240	35.9	33.99	14:hsa;hsa-mir-377,101062094,101062115,+	35.9017	33.9885
hsa-miR-454-5p	17	236	236	35.3	33.42	17:hsa;hsa-mir-454,59137781,59137802,-	35.3033	33.422
hsa-miR-140-5p	29	234	234	35	33.14	16:hsa;hsa-mir-140,69933103,69933124,+	35.0042	33.1388
hsa-miR-152-5p	15	221	221	33.06	31.3	17:hsa;hsa-mir-152,48037176,48037198,-	33.0595	31.2977
hsa-miR-22-5p	15	220	220	32.91	31.16	17:hsa;hsa-mir-22,1713917,1713938,-	32.9099	31.1561
hsa-miR-641	22	212	212	31.71	30.02	19:hsa;hsa-mir-641,40282558,40282581,-	31.7132	30.0232
hsa-miR-412-5p	9	206	206	30.82	29.17	14:hsa;hsa-mir-412,101065465,101065487,+	30.8156	29.1735
hsa-miR-503-5p	52	202	202	30.22	28.61	X:hsa;hsa-mir-503,134546333,134546355,-	30.2173	28.607
hsa-miR-154-5p	13	195	195	29.17	27.62	14:hsa;hsa-mir-154,101059769,101059790,+	29.1701	27.6156
hsa-miR-376a-3p	25	194	97	29.02	27.47	14:hsa;hsa-mir-376a-1,101040825,101040845,+	14.5103	13.737
hsa-miR-376a-3p	25	194	97	29.02	27.47	14:hsa;hsa-mir-376a-2,101040118,101040138,+	14.5103	13.737
hsa-miR-17-3p	22	190	190	28.42	26.91	13:hsa;hsa-mir-17,91350655,91350676,+	28.4222	26.9076
hsa-miR-26b-3p	16	187	187	27.97	26.48	2:hsa;hsa-mir-26b,218402692,218402712,+	27.9734	26.4827
hsa-miR-323b-3p	11	181	181	27.08	25.63	14:hsa;hsa-mir-323b,101056269,101056290,+	27.0759	25.633
hsa-miR-3117-3p	32	175	175	26.18	24.78	1:hsa;hsa-mir-3117,66628485,66628505,+	26.1783	24.7833
hsa-miR-708-3p	17	173	173	25.88	24.5	11:hsa;hsa-mir-708,79402078,79402099,-	25.8791	24.5
hsa-miR-330-5p	15	172	172	25.73	24.36	19:hsa;hsa-mir-330,45639011,45639032,-	25.7296	24.3584
hsa-miR-194-5p	12	171	94	25.58	24.22	11:hsa;hsa-mir-194-2,64891369,64891390,-	14.0615	13.3122
hsa-miR-549a-3p	20	170	170	25.43	24.08	15:hsa;hsa-mir-549a,80842038,80842058,-	25.4304	24.0752
hsa-miR-1296-5p	34	167	167	24.98	23.65	10:hsa;hsa-mir-1296,63372972,63372993,-	24.9816	23.6503
hsa-miR-708-5p	21	164	164	24.53	23.23	11:hsa;hsa-mir-708,79402032,79402054,-	24.5328	23.2255
hsa-miR-324-3p	44	164	164	24.53	23.23	17:hsa;hsa-mir-324,7223346,7223368,-	24.5328	23.2255
hsa-miR-194-5p	11	163	86	24.38	23.08	1:hsa;hsa-mir-194-1,220118171,220118192,-	12.8648	12.1792
hsa-miR-4775	8	163	163	24.38	23.08	2:hsa;hsa-mir-4775,207754816,207754837,+	24.3832	23.0838
hsa-let-7a-3p	23	157	79	23.49	22.23	9:hsa;hsa-let-7a-1,94176013,94176033,+	11.8176	11.1879
hsa-miR-1843	28	157	157	23.49	22.23	1:hsa;hsa-mir-1843,175968390,175968409,-	23.4857	22.2341
hsa-let-7a-3p	22	156	78	23.34	22.09	22:hsa;hsa-let-7a-3,46112800,46112820,+	11.6681	11.0463
hsa-miR-196a-3p	10	155	155	23.19	21.95	12:hsa;hsa-mir-196a-2,53991799,53991820,+	23.1865	21.9509
hsa-miR-3605-3p	27	154	154	23.04	21.81	1:hsa;hsa-mir-3605,33332458,33332480,-	23.0369	21.8093
hsa-miR-505-3p	26	153	153	22.89	21.67	X:hsa;hsa-mir-505,139924198,139924219,-	22.8873	21.6677
hsa-miR-195-5p	10	145	145	21.69	20.53	17:hsa;hsa-mir-195,7017629,7017649,-	21.6906	20.5347
hsa-miR-576-5p	7	142	142	21.24	20.11	4:hsa;hsa-mir-576,109488713,109488734,+	21.2418	20.1099
hsa-miR-665	32	142	142	21.24	20.11	14:hsa;hsa-mir-665,100875075,100875094,+	21.2418	20.1099
hsa-miR-502-3p	7	141	76	21.09	19.97	X:hsa;hsa-mir-502,50014649,50014670,+	11.3689	10.763
hsa-miR-3909	9	139	139	20.79	19.69	22:hsa;hsa-mir-3909,35335710,35335731,+	20.7931	19.685
hsa-miR-598-3p	24	137	137	20.49	19.4	8:hsa;hsa-mir-598,11035266,11035287,-	20.4939	19.4018
hsa-miR-138-1-3p	9	136	136	20.34	19.26	3:hsa;hsa-mir-138-1,44114274,44114295,+	20.3443	19.2601
hsa-miR-433-3p	20	136	136	20.34	19.26	14:hsa;hsa-mir-433,100881949,100881970,+	20.3443	19.2601
hsa-miR-153-3p	11	135	67.5	20.19	19.12	7:hsa;hsa-mir-153-2,157574388,157574409,-	10.0974	9.55926
hsa-miR-153-3p	11	135	67.5	20.19	19.12	2:hsa;hsa-mir-153-1,219294164,219294185,-	10.0974	9.55926
hsa-miR-628-5p	27	132	132	19.75	18.69	15:hsa;hsa-mir-628,55372962,55372983,-	19.7459	18.6937
hsa-miR-1185-2-3p	32	132	112.5	19.75	18.69	14:hsa;hsa-mir-1185-2,101044250,101044271,+	16.8289	15.9321
hsa-miR-34b-5p	13	130	130	19.45	18.41	11:hsa;hsa-mir-34b,111512950,111512972,+	19.4468	18.4104
hsa-miR-4677-3p	10	129	129	19.3	18.27	1:hsa;hsa-mir-4677,243346225,243346246,+	19.2972	18.2688
hsa-miR-7977	12	127	127	19	17.99	3:hsa;hsa-mir-7977,176515103,176515120,+	18.998	17.9856
hsa-miR-212-5p	14	127	127	19	17.99	17:hsa;hsa-mir-212,2050301,2050323,-	18.998	17.9856
hsa-miR-215-5p	18	125	125	18.7	17.7	1:hsa;hsa-mir-215,220117879,220117899,-	18.6988	17.7023
hsa-miR-18a-5p	16	125	119	18.7	17.7	13:hsa;hsa-mir-18a,91350756,91350778,+	17.8013	16.8526
hsa-miR-12136	4	124	62	18.55	17.56	1:hsa;hsa-mir-12136,632615,632632,-	9.27461	8.78036
hsa-miR-12136	4	124	62	18.55	17.56	MT:hsa;hsa-mir-12136,7444,7461,-	9.27461	8.78036
hsa-miR-146a-5p	28	123	123	18.4	17.42	5:hsa;hsa-mir-146a,160485372,160485393,+	18.3996	17.4191
hsa-miR-625-5p	9	121	121	18.1	17.14	14:hsa;hsa-mir-625,65471116,65471136,+	18.1004	17.1359
hsa-miR-328-3p	28	121	121	18.1	17.14	16:hsa;hsa-mir-328,67202368,67202389,-	18.1004	17.1359
hsa-miR-874-3p	21	121	121	18.1	17.14	5:hsa;hsa-mir-874,137647618,137647639,-	18.1004	17.1359
hsa-miR-548o-3p	10	115	57.33	17.2	16.29	20:hsa;hsa-mir-548o-2,38516607,38516628,+	8.57652	8.11947
hsa-miR-30c-1-3p	10	115	115	17.2	16.29	1:hsa;hsa-mir-30c-1,40757339,40757360,+	17.2029	16.2862
hsa-miR-548o-3p	10	115	57.33	17.2	16.29	7:hsa;hsa-mir-548o,102405828,102405849,-	8.57652	8.11947
hsa-miR-542-5p	15	114	114	17.05	16.14	X:hsa;hsa-mir-542,134541356,134541378,-	17.0533	16.1445
hsa-miR-485-3p	22	114	114	17.05	16.14	14:hsa;hsa-mir-485,101055464,101055485,+	17.0533	16.1445
hsa-miR-495-3p	17	111	111	16.6	15.72	14:hsa;hsa-mir-495,101033804,101033825,+	16.6045	15.7197
hsa-miR-191-3p	18	110	110	16.45	15.58	3:hsa;hsa-mir-191,49020675,49020696,-	16.4549	15.5781
hsa-miR-1180-3p	15	110	110	16.45	15.58	17:hsa;hsa-mir-1180,19344546,19344567,-	16.4549	15.5781
hsa-let-7f-2-3p	6	109	109	16.31	15.44	X:hsa;hsa-let-7f-2,53557249,53557270,-	16.3054	15.4364
hsa-miR-590-3p	10	109	109	16.31	15.44	7:hsa;hsa-mir-590,74191253,74191273,+	16.3054	15.4364
hsa-miR-382-3p	10	107	107	16.01	15.15	14:hsa;hsa-mir-382,101054352,101054372,+	16.0062	15.1532
hsa-miR-93-3p	23	106	106	15.86	15.01	7:hsa;hsa-mir-93,100093817,100093838,-	15.8566	15.0116
hsa-miR-3158-3p	17	104	52	15.56	14.73	10:hsa;hsa-mir-3158-2,101601466,101601487,-	7.7787	7.36417
hsa-miR-3158-3p	17	104	52	15.56	14.73	10:hsa;hsa-mir-3158-1,101601466,101601487,+	7.7787	7.36417
hsa-miR-409-5p	11	101	101	15.11	14.3	14:hsa;hsa-mir-409,101065314,101065336,+	15.1086	14.3035
hsa-miR-2355-5p	23	100	100	14.96	14.16	2:hsa;hsa-mir-2355,207109997,207110017,-	14.959	14.1619
hsa-miR-942-5p	16	100	100	14.96	14.16	1:hsa;hsa-mir-942,117094655,117094676,+	14.959	14.1619
hsa-miR-652-3p	16	99	99	14.81	14.02	X:hsa;hsa-mir-652,110055389,110055409,+	14.8095	14.0203
hsa-miR-1185-5p	8	98	49	14.66	13.88	14:hsa;hsa-mir-1185-1,101042991,101043011,+	7.32993	6.93932
hsa-miR-1185-5p	8	98	49	14.66	13.88	14:hsa;hsa-mir-1185-2,101044212,101044232,+	7.32993	6.93932
hsa-miR-339-5p	11	97	97	14.51	13.74	7:hsa;hsa-mir-339,1022947,1022969,-	14.5103	13.737
hsa-miR-183-5p	14	97	97	14.51	13.74	7:hsa;hsa-mir-183,129774931,129774952,-	14.5103	13.737
hsa-miR-9985	8	96	46.83	14.36	13.6	Y:hsa;hsa-mir-9985,4606140,4606158,+	7.00582	6.63248
hsa-miR-376b-3p	9	95	95	14.21	13.45	14:hsa;hsa-mir-376b,101040497,101040518,+	14.2111	13.4538
hsa-miR-425-3p	17	94	94	14.06	13.31	3:hsa;hsa-mir-425,49020202,49020223,-	14.0615	13.3122
hsa-miR-3661	21	92	92	13.76	13.03	5:hsa;hsa-mir-3661,134225777,134225798,+	13.7623	13.0289
hsa-miR-1197	2	88	88	13.16	12.46	14:hsa;hsa-mir-1197,101025620,101025640,+	13.164	12.4624
hsa-miR-380-3p	2	87	87	13.01	12.32	14:hsa;hsa-mir-380,101025056,101025077,+	13.0144	12.3208
hsa-miR-589-3p	17	85	85	12.72	12.04	7:hsa;hsa-mir-589,5495879,5495902,-	12.7152	12.0376
hsa-miR-340-3p	12	85	85	12.72	12.04	5:hsa;hsa-mir-340,180015360,180015381,-	12.7152	12.0376
hsa-miR-4746-5p	12	83	83	12.42	11.75	19:hsa;hsa-mir-4746,4445987,4446009,+	12.416	11.7544
hsa-miR-190a-5p	10	77	77	11.52	10.9	15:hsa;hsa-mir-190a,62823971,62823992,+	11.5185	10.9046
hsa-let-7e-3p	9	76	76	11.37	10.76	19:hsa;hsa-let-7e,51692838,51692859,+	11.3689	10.763
hsa-miR-146b-3p	12	76	76	11.37	10.76	10:hsa;hsa-mir-146b,102436557,102436578,+	11.3689	10.763
hsa-miR-27a-5p	12	75	75	11.22	10.62	19:hsa;hsa-mir-27a,13836449,13836470,-	11.2193	10.6214
hsa-miR-329-3p	40	74	37	11.07	10.48	14:hsa;hsa-mir-329-2,101027151,101027172,+	5.53485	5.23989
hsa-miR-329-3p	40	74	37	11.07	10.48	14:hsa;hsa-mir-329-1,101026834,101026855,+	5.53485	5.23989
hsa-miR-299-5p	12	72	72	10.77	10.2	14:hsa;hsa-mir-299,101023800,101023821,+	10.7705	10.1965
hsa-miR-671-5p	23	72	72	10.77	10.2	7:hsa;hsa-mir-671,151238449,151238471,+	10.7705	10.1965
hsa-miR-125a-3p	15	72	72	10.77	10.2	19:hsa;hsa-mir-125a,51693306,51693327,+	10.7705	10.1965
hsa-let-7i-3p	9	72	72	10.77	10.2	12:hsa;hsa-let-7i,62603747,62603768,+	10.7705	10.1965
hsa-miR-548e-3p	20	69	69	10.32	9.77	10:hsa;hsa-mir-548e,110988978,110988999,+	10.3217	9.77169
hsa-miR-1301-3p	30	69	69	10.32	9.77	2:hsa;hsa-mir-1301,25328687,25328710,-	10.3217	9.77169
hsa-miR-99a-3p	11	69	69	10.32	9.77	21:hsa;hsa-mir-99a,16539138,16539159,+	10.3217	9.77169
hsa-miR-497-5p	6	68	68	10.17	9.63	17:hsa;hsa-mir-497,7017934,7017954,-	10.1722	9.63007
hsa-miR-656-3p	11	68	68	10.17	9.63	14:hsa;hsa-mir-656,101066766,101066786,+	10.1722	9.63007
hsa-miR-1271-5p	11	67	67	10.02	9.49	5:hsa;hsa-mir-1271,176367960,176367981,+	10.0226	9.48845
hsa-miR-337-5p	11	65	65	9.72	9.21	14:hsa;hsa-mir-337,100874515,100874535,+	9.72338	9.20522
hsa-miR-324-5p	15	65	65	9.72	9.21	17:hsa;hsa-mir-324,7223312,7223333,-	9.72338	9.20522
hsa-miR-627-5p	6	64	64	9.57	9.06	15:hsa;hsa-mir-627,42199585,42199606,-	9.57379	9.0636
hsa-miR-25-5p	6	64	64	9.57	9.06	7:hsa;hsa-mir-25,100093573,100093593,-	9.57379	9.0636
hsa-miR-4435	15	62	15.5	9.27	8.78	2:hsa;hsa-mir-4435-1,87629764,87629785,+	2.31865	2.19509
hsa-miR-4435	15	62	15.5	9.27	8.78	2:hsa;hsa-mir-4435-2,111321017,111321038,-	2.31865	2.19509
hsa-miR-4435	15	62	15.5	9.27	8.78	2:hsa;hsa-mir-4435-2,87629764,87629785,+	2.31865	2.19509
hsa-miR-4435	15	62	15.5	9.27	8.78	2:hsa;hsa-mir-4435-1,111321021,111321042,-	2.31865	2.19509
hsa-miR-766-3p	10	62	62	9.27	8.78	X:hsa;hsa-mir-766,119646802,119646823,-	9.27461	8.78036
hsa-miR-379-5p	13	61	61	9.13	8.64	14:hsa;hsa-mir-379,101022071,101022091,+	9.12502	8.63874
hsa-miR-4326	11	61	61	9.13	8.64	20:hsa;hsa-mir-4326,63286818,63286837,+	9.12502	8.63874
hsa-let-7b-3p	8	60	60	8.98	8.5	22:hsa;hsa-let-7b,46113745,46113766,+	8.97543	8.49712
hsa-miR-365b-5p	22	60	60	8.98	8.5	17:hsa;hsa-mir-365b,31575439,31575460,+	8.97543	8.49712
hsa-miR-7974	4	58	58	8.68	8.21	19:hsa;hsa-mir-7974,11495599,11495622,-	8.67625	8.21389
hsa-miR-2277-5p	17	58	58	8.68	8.21	5:hsa;hsa-mir-2277,93620713,93620736,-	8.67625	8.21389
hsa-miR-374b-3p	11	58	58	8.68	8.21	X:hsa;hsa-mir-374b,74218587,74218608,-	8.67625	8.21389
hsa-miR-185-3p	15	58	58	8.68	8.21	22:hsa;hsa-mir-185,20033188,20033209,+	8.67625	8.21389
hsa-miR-33b-5p	6	58	58	8.68	8.21	17:hsa;hsa-mir-33b,17813851,17813870,-	8.67625	8.21389
hsa-miR-296-3p	26	56	56	8.38	7.93	20:hsa;hsa-mir-296,58817662,58817683,-	8.37706	7.93065
hsa-miR-3912-3p	15	54	54	8.08	7.65	5:hsa;hsa-mir-3912,171386718,171386738,-	8.07788	7.64741
hsa-miR-148a-5p	6	54	54	8.08	7.65	7:hsa;hsa-mir-148a,25949924,25949945,-	8.07788	7.64741
hsa-miR-330-3p	25	54	54	8.08	7.65	19:hsa;hsa-mir-330,45639050,45639072,-	8.07788	7.64741
hsa-miR-224-3p	18	54	54	8.08	7.65	X:hsa;hsa-mir-224,151958630,151958652,-	8.07788	7.64741
hsa-miR-31-3p	12	52	52	7.78	7.36	9:hsa;hsa-mir-31,21512158,21512179,-	7.7787	7.36417
hsa-miR-3605-5p	17	52	52	7.78	7.36	1:hsa;hsa-mir-3605,33332414,33332436,-	7.7787	7.36417
hsa-miR-32-5p	5	50	50	7.48	7.08	9:hsa;hsa-mir-32,109046234,109046255,-	7.47952	7.08094
hsa-let-7f-1-3p	5	48	48	7.18	6.8	9:hsa;hsa-let-7f-1,94176409,94176430,+	7.18034	6.7977
hsa-miR-29c-5p	11	48	48	7.18	6.8	1:hsa;hsa-mir-29c,207801867,207801888,-	7.18034	6.7977
hsa-miR-29b-1-5p	10	47	47	7.03	6.66	7:hsa;hsa-mir-29b-1,130877468,130877491,-	7.03075	6.65608
hsa-miR-486-3p	8	47	23.5	7.03	6.66	8:hsa;hsa-mir-486-2,41660486,41660506,+	3.51538	3.32804
hsa-miR-501-3p	6	47	47	7.03	6.66	X:hsa;hsa-mir-501,50009772,50009793,+	7.03075	6.65608
hsa-miR-486-3p	8	47	23.5	7.03	6.66	8:hsa;hsa-mir-486-1,41660486,41660506,-	3.51538	3.32804
hsa-miR-433-5p	5	46	46	6.88	6.51	14:hsa;hsa-mir-433,100881897,100881918,+	6.88116	6.51446
hsa-miR-659-5p	9	45	45	6.73	6.37	22:hsa;hsa-mir-659,37847699,37847720,-	6.73157	6.37284
hsa-miR-10399-3p	13	45	45	6.73	6.37	7:hsa;hsa-mir-10399,139044137,139044157,-	6.73157	6.37284
hsa-miR-15b-3p	7	44	44	6.58	6.23	3:hsa;hsa-mir-15b,160404645,160404666,+	6.58198	6.23122
hsa-miR-887-5p	15	43	43	6.43	6.09	5:hsa;hsa-mir-887,15935191,15935211,+	6.43239	6.0896
hsa-miR-101-5p	8	43	43	6.43	6.09	1:hsa;hsa-mir-101-1,65058444,65058465,-	6.43239	6.0896
hsa-miR-4521	16	41	41	6.13	5.81	17:hsa;hsa-mir-4521,8186948,8186969,+	6.13321	5.80637
hsa-miR-34a-3p	13	41	41	6.13	5.81	1:hsa;hsa-mir-34a,9151731,9151752,-	6.13321	5.80637
hsa-miR-616-5p	4	41	41	6.13	5.81	12:hsa;hsa-mir-616,57519178,57519199,-	6.13321	5.80637
hsa-miR-496	7	41	41	6.13	5.81	14:hsa;hsa-mir-496,101060628,101060649,+	6.13321	5.80637
hsa-miR-7-1-3p	12	40	40	5.98	5.66	9:hsa;hsa-mir-7-1,83969813,83969834,-	5.98362	5.66475
hsa-miR-378c	8	40	20.75	5.98	5.66	10:hsa;hsa-mir-378c,130962598,130962622,-	3.104	2.93859
hsa-miR-874-5p	11	40	40	5.98	5.66	5:hsa;hsa-mir-874,137647581,137647603,-	5.98362	5.66475
hsa-miR-664a-3p	8	39	39	5.83	5.52	1:hsa;hsa-mir-664a,220200586,220200608,-	5.83403	5.52313
hsa-miR-758-5p	17	39	39	5.83	5.52	14:hsa;hsa-mir-758,101026034,101026055,+	5.83403	5.52313
hsa-miR-331-5p	15	39	39	5.83	5.52	12:hsa;hsa-mir-331,95308445,95308466,+	5.83403	5.52313
hsa-miR-320c	18	39	11.31	5.83	5.52	18:hsa;hsa-mir-320c-2,24321716,24321735,+	1.69215	1.60198
hsa-miR-370-5p	14	39	39	5.83	5.52	14:hsa;hsa-mir-370,100911151,100911172,+	5.83403	5.52313
hsa-miR-548e-5p	8	38	38	5.68	5.38	10:hsa;hsa-mir-548e,110988940,110988961,+	5.68444	5.38151
hsa-miR-137-3p	17	38	38	5.68	5.38	1:hsa;hsa-mir-137,98046128,98046150,-	5.68444	5.38151
hsa-miR-375-3p	3	38	38	5.68	5.38	2:hsa;hsa-mir-375,219001684,219001705,-	5.68444	5.38151
hsa-miR-539-5p	12	38	38	5.68	5.38	14:hsa;hsa-mir-539,101047329,101047350,+	5.68444	5.38151
hsa-miR-5699-5p	14	38	38	5.68	5.38	10:hsa;hsa-mir-5699,641698,641719,-	5.68444	5.38151
hsa-miR-181b-2-3p	20	37	37	5.53	5.24	9:hsa;hsa-mir-181b-2,124693763,124693782,+	5.53485	5.23989
hsa-miR-6500-3p	6	37	37	5.53	5.24	1:hsa;hsa-mir-6500,51060072,51060092,+	5.53485	5.23989
hsa-miR-5000-3p	5	36	36	5.39	5.1	2:hsa;hsa-mir-5000,75090873,75090894,+	5.38526	5.09827
hsa-miR-3126-5p	9	35	35	5.24	4.96	2:hsa;hsa-mir-3126,69103691,69103712,+	5.23567	4.95665
hsa-miR-219a-1-3p	12	35	35	5.24	4.96	6:hsa;hsa-mir-219a-1,33207896,33207917,+	5.23567	4.95665
hsa-miR-128-1-5p	5	35	35	5.24	4.96	2:hsa;hsa-mir-128-1,135665411,135665433,+	5.23567	4.95665
hsa-miR-550a-3p	12	34	11.33	5.09	4.82	7:hsa;hsa-mir-550a-3,29680793,29680814,-	1.69536	1.60501
hsa-miR-550a-3p	12	34	11.33	5.09	4.82	7:hsa;hsa-mir-550a-2,32733041,32733062,+	1.69536	1.60501
hsa-miR-550a-3p	12	34	11.33	5.09	4.82	7:hsa;hsa-mir-550a-1,30289854,30289875,+	1.69536	1.60501
hsa-miR-320c	13	34	7.73	5.09	4.82	18:hsa;hsa-mir-320c-1,21683559,21683578,+	1.15612	1.09451
hsa-miR-320d	16	34	18.93	5.09	4.82	13:hsa;hsa-mir-320d-1,40727857,40727875,-	2.83153	2.68064
hsa-miR-532-3p	8	34	34	5.09	4.82	X:hsa;hsa-mir-532,50003204,50003225,+	5.08608	4.81504
hsa-let-7d-3p	6	34	34	5.09	4.82	9:hsa;hsa-let-7d,94178895,94178916,+	5.08608	4.81504
hsa-miR-188-5p	8	32	32	4.79	4.53	X:hsa;hsa-mir-188,50003517,50003537,+	4.78689	4.5318
hsa-miR-34c-3p	10	32	32	4.79	4.53	11:hsa;hsa-mir-34c,111513484,111513505,+	4.78689	4.5318
hsa-miR-24-1-5p	12	31	31	4.64	4.39	9:hsa;hsa-mir-24-1,95086027,95086048,+	4.6373	4.39018
hsa-miR-200b-3p	8	31	31	4.64	4.39	1:hsa;hsa-mir-200b,1167160,1167181,+	4.6373	4.39018
hsa-miR-9903	8	30	30	4.49	4.25	8:hsa;hsa-mir-9903,98393695,98393716,-	4.48771	4.24856
hsa-miR-193a-5p	5	29	29	4.34	4.11	17:hsa;hsa-mir-193a,31560016,31560037,+	4.33812	4.10694
hsa-miR-376a-2-5p	5	29	29	4.34	4.11	14:hsa;hsa-mir-376a-2,101040080,101040100,+	4.33812	4.10694
hsa-miR-937-3p	15	28	28	4.19	3.97	8:hsa;hsa-mir-937,143813007,143813028,-	4.18853	3.96532
hsa-miR-10399-5p	6	28	28	4.19	3.97	7:hsa;hsa-mir-10399,139044100,139044120,-	4.18853	3.96532
hsa-miR-362-5p	6	27	27	4.04	3.82	X:hsa;hsa-mir-362,50008968,50008991,+	4.03894	3.82371
hsa-miR-550a-5p	11	27	13.33	4.04	3.82	7:hsa;hsa-mir-550a-2,32733002,32733024,+	1.99454	1.88825
hsa-miR-550a-5p	11	27	13.33	4.04	3.82	7:hsa;hsa-mir-550a-1,30289815,30289837,+	1.99454	1.88825
hsa-miR-6852-5p	15	27	27	4.04	3.82	9:hsa;hsa-mir-6852,35710681,35710701,-	4.03894	3.82371
hsa-miR-18a-3p	6	26	26	3.89	3.68	13:hsa;hsa-mir-18a,91350797,91350819,+	3.88935	3.68209
hsa-miR-181b-3p	15	26	26	3.89	3.68	1:hsa;hsa-mir-181b-1,198858948,198858968,-	3.88935	3.68209
hsa-miR-2682-5p	5	25	25	3.74	3.54	1:hsa;hsa-mir-2682,98045264,98045286,-	3.73976	3.54047
hsa-miR-3129-5p	8	25	25	3.74	3.54	2:hsa;hsa-mir-3129,189133044,189133065,-	3.73976	3.54047
hsa-miR-3174	11	25	25	3.74	3.54	15:hsa;hsa-mir-3174,90006764,90006786,+	3.73976	3.54047
hsa-miR-185-5p	7	25	25	3.74	3.54	22:hsa;hsa-mir-185,20033153,20033174,+	3.73976	3.54047
hsa-miR-2467-5p	6	25	25	3.74	3.54	2:hsa;hsa-mir-2467,239351735,239351757,-	3.73976	3.54047
hsa-miR-218-1-3p	14	25	25	3.74	3.54	4:hsa;hsa-mir-218-1,20528342,20528363,+	3.73976	3.54047
hsa-miR-3913-5p	13	24	12	3.59	3.4	12:hsa;hsa-mir-3913-1,69584744,69584765,-	1.79509	1.69942
hsa-miR-320d	11	24	8.1	3.59	3.4	X:hsa;hsa-mir-320d-2,140926201,140926219,-	1.21097	1.14644
hsa-miR-154-3p	8	24	24	3.59	3.4	14:hsa;hsa-mir-154,101059805,101059826,+	3.59017	3.39885
hsa-miR-134-3p	9	24	24	3.59	3.4	14:hsa;hsa-mir-134,101054732,101054754,+	3.59017	3.39885
hsa-miR-4636	8	24	24	3.59	3.4	5:hsa;hsa-mir-4636,9053825,9053846,-	3.59017	3.39885
hsa-miR-618	5	24	24	3.59	3.4	12:hsa;hsa-mir-618,80935751,80935773,-	3.59017	3.39885
hsa-miR-3913-5p	13	24	12	3.59	3.4	12:hsa;hsa-mir-3913-2,69584744,69584765,+	1.79509	1.69942
hsa-miR-3677-3p	3	24	24	3.59	3.4	16:hsa;hsa-mir-3677,2270751,2270772,+	3.59017	3.39885
hsa-miR-6716-3p	10	23	23	3.44	3.26	11:hsa;hsa-mir-6716,118644048,118644069,+	3.44058	3.25723
hsa-miR-3176	13	23	23	3.44	3.26	16:hsa;hsa-mir-3176,543336,543354,+	3.44058	3.25723
hsa-miR-33a-5p	4	23	23	3.44	3.26	22:hsa;hsa-mir-33a,41900949,41900969,+	3.44058	3.25723
hsa-miR-744-3p	4	23	23	3.44	3.26	17:hsa;hsa-mir-744,12081966,12081987,+	3.44058	3.25723
hsa-miR-342-5p	13	21	21	3.14	2.97	14:hsa;hsa-mir-342,100109673,100109693,+	3.1414	2.97399
hsa-miR-580-3p	5	21	21	3.14	2.97	5:hsa;hsa-mir-580,36147952,36147973,-	3.1414	2.97399
hsa-miR-1255a	5	21	21	3.14	2.97	4:hsa;hsa-mir-1255a,101330329,101330351,-	3.1414	2.97399
hsa-miR-9-5p	8	21	7	3.14	2.97	5:hsa;hsa-mir-9-2,88666868,88666890,-	1.04713	0.991331
hsa-miR-34b-3p	8	21	21	3.14	2.97	11:hsa;hsa-mir-34b,111512987,111513008,+	3.1414	2.97399
hsa-miR-582-3p	9	21	21	3.14	2.97	5:hsa;hsa-mir-582,59703658,59703679,-	3.1414	2.97399
hsa-miR-4454	5	21	21	3.14	2.97	4:hsa;hsa-mir-4454,163093576,163093595,-	3.1414	2.97399
hsa-miR-627-3p	6	21	21	3.14	2.97	15:hsa;hsa-mir-627,42199624,42199643,-	3.1414	2.97399
hsa-miR-9-5p	8	21	7	3.14	2.97	15:hsa;hsa-mir-9-3,89368032,89368054,+	1.04713	0.991331
hsa-miR-9-5p	8	21	7	3.14	2.97	1:hsa;hsa-mir-9-1,156420356,156420378,-	1.04713	0.991331
hsa-miR-329-5p	8	20	10	2.99	2.83	14:hsa;hsa-mir-329-2,101027114,101027136,+	1.4959	1.41619
hsa-miR-628-3p	11	20	20	2.99	2.83	15:hsa;hsa-mir-628,55373000,55373020,-	2.99181	2.83237
hsa-miR-329-5p	8	20	10	2.99	2.83	14:hsa;hsa-mir-329-1,101026797,101026819,+	1.4959	1.41619
hsa-miR-3129-3p	6	19	19	2.84	2.69	2:hsa;hsa-mir-3129,189133082,189133103,-	2.84222	2.69076
hsa-miR-3928-3p	9	18	18	2.69	2.55	22:hsa;hsa-mir-3928,31160098,31160119,-	2.69263	2.54914
hsa-miR-770-5p	5	18	18	2.69	2.55	14:hsa;hsa-mir-770,100852409,100852431,+	2.69263	2.54914
hsa-miR-1228-3p	7	18	18	2.69	2.55	12:hsa;hsa-mir-1228,57194555,57194574,+	2.69263	2.54914
hsa-miR-625-3p	11	17	17	2.54	2.41	14:hsa;hsa-mir-625,65471153,65471174,+	2.54304	2.40752
hsa-miR-193b-5p	7	17	17	2.54	2.41	16:hsa;hsa-mir-193b,14303980,14304001,+	2.54304	2.40752
hsa-miR-2116-3p	9	17	17	2.54	2.41	15:hsa;hsa-mir-2116,59171233,59171253,-	2.54304	2.40752
hsa-miR-940	5	17	17	2.54	2.41	16:hsa;hsa-mir-940,2271806,2271826,+	2.54304	2.40752
hsa-miR-655-3p	5	17	17	2.54	2.41	14:hsa;hsa-mir-655,101049610,101049631,+	2.54304	2.40752
hsa-let-7g-3p	6	17	17	2.54	2.41	3:hsa;hsa-let-7g,52268339,52268359,-	2.54304	2.40752
hsa-miR-10401-3p	7	16	2	2.39	2.27	GL000220.1:hsa;hsa-mir-10401,150006,150026,+	0.299181	0.283237
hsa-miR-10401-3p	7	16	2	2.39	2.27	GL000220.1:hsa;hsa-mir-10401,106034,106054,+	0.299181	0.283237
hsa-miR-541-5p	6	16	16	2.39	2.27	14:hsa;hsa-mir-541,101064504,101064528,+	2.39345	2.2659
hsa-miR-10401-3p	7	16	2	2.39	2.27	KI270733.1:hsa;hsa-mir-10401,122883,122903,+	0.299181	0.283237
hsa-miR-33a-3p	4	16	16	2.39	2.27	22:hsa;hsa-mir-33a,41900989,41901010,+	2.39345	2.2659
hsa-miR-4466	3	16	16	2.39	2.27	6:hsa;hsa-mir-4466,156779682,156779699,-	2.39345	2.2659
hsa-miR-98-3p	5	16	16	2.39	2.27	X:hsa;hsa-mir-98,53556302,53556323,-	2.39345	2.2659
hsa-miR-1276	5	16	16	2.39	2.27	15:hsa;hsa-mir-1276,85770507,85770526,-	2.39345	2.2659
hsa-miR-142-5p	5	16	16	2.39	2.27	17:hsa;hsa-mir-142,58331247,58331267,-	2.39345	2.2659
hsa-miR-10401-3p	7	16	2	2.39	2.27	21:hsa;hsa-mir-10401,8250807,8250827,+	0.299181	0.283237
hsa-miR-381-5p	4	16	16	2.39	2.27	14:hsa;hsa-mir-381,101045927,101045948,+	2.39345	2.2659
hsa-miR-10401-3p	7	16	2	2.39	2.27	21:hsa;hsa-mir-10401,8206598,8206618,+	0.299181	0.283237
hsa-miR-10401-3p	7	16	2	2.39	2.27	KI270733.1:hsa;hsa-mir-10401,167966,167986,+	0.299181	0.283237
hsa-miR-4662a-5p	2	16	16	2.39	2.27	8:hsa;hsa-mir-4662a,124821990,124822011,+	2.39345	2.2659
hsa-miR-10401-3p	7	16	2	2.39	2.27	21:hsa;hsa-mir-10401,8389645,8389665,+	0.299181	0.283237
hsa-miR-10401-3p	7	16	2	2.39	2.27	21:hsa;hsa-mir-10401,8433832,8433852,+	0.299181	0.283237
hsa-miR-450a-2-3p	8	15	15	2.24	2.12	X:hsa;hsa-mir-450a-2,134540565,134540586,-	2.24386	2.12428
hsa-miR-129-5p	5	15	8	2.24	2.12	11:hsa;hsa-mir-129-2,43581408,43581428,+	1.19672	1.13295
hsa-miR-129-5p	5	15	8	2.24	2.12	7:hsa;hsa-mir-129-1,128207876,128207896,+	1.19672	1.13295
hsa-miR-3167	5	15	15	2.24	2.12	11:hsa;hsa-mir-3167,126988511,126988532,-	2.24386	2.12428
hsa-miR-4768-5p	3	15	15	2.24	2.12	X:hsa;hsa-mir-4768,17425889,17425910,+	2.24386	2.12428
hsa-miR-548n	4	14	14	2.09	1.98	7:hsa;hsa-mir-548n,34940769,34940790,-	2.09427	1.98266
hsa-miR-501-5p	4	14	14	2.09	1.98	X:hsa;hsa-mir-501,50009735,50009756,+	2.09427	1.98266
hsa-let-7a-2-3p	7	14	14	2.09	1.98	11:hsa;hsa-let-7a-2,122146571,122146592,-	2.09427	1.98266
hsa-miR-3622a-5p	7	14	14	2.09	1.98	8:hsa;hsa-mir-3622a,27701690,27701711,+	2.09427	1.98266
hsa-miR-210-5p	2	13	13	1.94	1.84	11:hsa;hsa-mir-210,568116,568137,-	1.94468	1.84104
hsa-miR-32-3p	4	13	13	1.94	1.84	9:hsa;hsa-mir-32,109046275,109046296,-	1.94468	1.84104
hsa-miR-2355-3p	7	13	13	1.94	1.84	2:hsa;hsa-mir-2355,207110040,207110061,-	1.94468	1.84104
hsa-miR-664a-5p	7	13	13	1.94	1.84	1:hsa;hsa-mir-664a,220200548,220200571,-	1.94468	1.84104
hsa-miR-548al	6	13	13	1.94	1.84	11:hsa;hsa-mir-548al,74399301,74399322,+	1.94468	1.84104
hsa-miR-1304-5p	6	13	13	1.94	1.84	11:hsa;hsa-mir-1304,93733693,93733714,-	1.94468	1.84104
hsa-miR-133a-3p	3	13	6.5	1.94	1.84	18:hsa;hsa-mir-133a-1,21825750,21825771,-	0.972338	0.920522
hsa-miR-7705	7	13	13	1.94	1.84	8:hsa;hsa-mir-7705,100702968,100702990,-	1.94468	1.84104
hsa-miR-133a-3p	3	13	6.5	1.94	1.84	20:hsa;hsa-mir-133a-2,62564970,62564991,+	0.972338	0.920522
hsa-miR-29b-2-5p	4	13	13	1.94	1.84	1:hsa;hsa-mir-29b-2,207802453,207802474,-	1.94468	1.84104
hsa-miR-197-3p	3	13	13	1.94	1.84	1:hsa;hsa-mir-197,109598940,109598961,+	1.94468	1.84104
hsa-miR-12135	3	12	12	1.8	1.7	15:hsa;hsa-mir-12135,73299962,73299979,+	1.79509	1.69942
hsa-miR-4661-5p	6	12	12	1.8	1.7	8:hsa;hsa-mir-4661,91205494,91205515,+	1.79509	1.69942
hsa-miR-18b-5p	6	12	6	1.8	1.7	X:hsa;hsa-mir-18b,134170046,134170068,-	0.897543	0.849712
hsa-miR-6866-5p	4	12	12	1.8	1.7	17:hsa;hsa-mir-6866,40161938,40161960,+	1.79509	1.69942
hsa-miR-3200-3p	4	12	12	1.8	1.7	22:hsa;hsa-mir-3200,30731610,30731631,+	1.79509	1.69942
hsa-miR-190a-3p	2	12	12	1.8	1.7	15:hsa;hsa-mir-190a,62824008,62824028,+	1.79509	1.69942
hsa-miR-500a-5p	6	12	8	1.8	1.7	X:hsa;hsa-mir-500a,50008443,50008465,+	1.19672	1.13295
hsa-miR-7976	5	11	11	1.65	1.56	3:hsa;hsa-mir-7976,127587111,127587129,-	1.64549	1.55781
hsa-miR-4473	8	11	11	1.65	1.56	9:hsa;hsa-mir-4473,20411204,20411225,-	1.64549	1.55781
hsa-miR-1245a	8	11	11	1.65	1.56	2:hsa;hsa-mir-1245a,188978136,188978156,+	1.64549	1.55781
hsa-miR-769-3p	4	11	11	1.65	1.56	19:hsa;hsa-mir-769,46019000,46019022,+	1.64549	1.55781
hsa-miR-6840-5p	5	11	11	1.65	1.56	7:hsa;hsa-mir-6840,100356656,100356679,+	1.64549	1.55781
hsa-miR-4421	5	11	11	1.65	1.56	1:hsa;hsa-mir-4421,51059879,51059900,+	1.64549	1.55781
hsa-miR-3934-5p	7	10	10	1.5	1.42	6:hsa;hsa-mir-3934,33698152,33698173,+	1.4959	1.41619
hsa-miR-651-5p	3	10	10	1.5	1.42	X:hsa;hsa-mir-651,8126980,8127001,+	1.4959	1.41619
hsa-miR-4762-5p	5	10	10	1.5	1.42	22:hsa;hsa-mir-4762,45760532,45760552,+	1.4959	1.41619
hsa-miR-153-5p	2	10	10	1.5	1.42	7:hsa;hsa-mir-153-2,157574350,157574371,-	1.4959	1.41619
hsa-miR-487a-5p	4	10	10	1.5	1.42	14:hsa;hsa-mir-487a,101052458,101052479,+	1.4959	1.41619
hsa-miR-4645-3p	7	10	10	1.5	1.42	6:hsa;hsa-mir-4645,2854077,2854098,-	1.4959	1.41619
hsa-miR-5002-5p	7	10	10	1.5	1.42	3:hsa;hsa-mir-5002,124132949,124132972,+	1.4959	1.41619
hsa-miR-548ab	2	10	10	1.5	1.42	3:hsa;hsa-mir-548ab,103524043,103524064,-	1.4959	1.41619
hsa-miR-96-5p	1	10	10	1.5	1.42	7:hsa;hsa-mir-96,129774700,129774722,-	1.4959	1.41619
hsa-miR-483-3p	6	10	10	1.5	1.42	11:hsa;hsa-mir-483,2134181,2134201,-	1.4959	1.41619
hsa-miR-6818-5p	2	10	10	1.5	1.42	22:hsa;hsa-mir-6818,30007054,30007075,+	1.4959	1.41619
hsa-miR-2110	6	10	10	1.5	1.42	10:hsa;hsa-mir-2110,114174112,114174133,-	1.4959	1.41619
hsa-miR-6720-3p	4	10	10	1.5	1.42	6:hsa;hsa-mir-6720,1390380,1390401,-	1.4959	1.41619
hsa-miR-326	4	10	10	1.5	1.42	11:hsa;hsa-mir-326,75335151,75335170,-	1.4959	1.41619
hsa-miR-5010-3p	4	10	10	1.5	1.42	17:hsa;hsa-mir-5010,42514267,42514288,+	1.4959	1.41619
hsa-miR-30b-3p	2	10	10	1.5	1.42	8:hsa;hsa-mir-30b,134800574,134800595,-	1.4959	1.41619
hsa-miR-7-5p	5	9	3	1.35	1.27	19:hsa;hsa-mir-7-3,4770700,4770723,+	0.448771	0.424856
hsa-miR-195-3p	6	9	9	1.35	1.27	17:hsa;hsa-mir-195,7017667,7017688,-	1.34631	1.27457
hsa-miR-20a-3p	3	9	9	1.35	1.27	13:hsa;hsa-mir-20a,91351108,91351129,+	1.34631	1.27457
hsa-miR-6770-3p	4	9	1	1.35	1.27	16:hsa;hsa-mir-6770-2,14930859,14930879,+	0.14959	0.141619
hsa-miR-6770-3p	4	9	1	1.35	1.27	16:hsa;hsa-mir-6770-1,14930859,14930879,+	0.14959	0.141619
hsa-miR-7-5p	5	9	3	1.35	1.27	9:hsa;hsa-mir-7-1,83969771,83969794,-	0.448771	0.424856
hsa-miR-6770-3p	4	9	1	1.35	1.27	16:hsa;hsa-mir-6770-3,16329344,16329364,+	0.14959	0.141619
hsa-miR-3651	4	9	9	1.35	1.27	9:hsa;hsa-mir-3651,92292521,92292544,-	1.34631	1.27457
hsa-miR-6514-5p	5	9	9	1.35	1.27	11:hsa;hsa-mir-6514,62792702,62792724,-	1.34631	1.27457
hsa-miR-6770-3p	4	9	1	1.35	1.27	16:hsa;hsa-mir-6770-3,14930859,14930879,+	0.14959	0.141619
hsa-miR-320e	9	9	8.5	1.35	1.27	19:hsa;hsa-mir-320e,46709325,46709342,-	1.27152	1.20376
hsa-miR-3613-5p	3	9	9	1.35	1.27	13:hsa;hsa-mir-3613,49996430,49996451,-	1.34631	1.27457
hsa-miR-296-5p	5	9	9	1.35	1.27	20:hsa;hsa-mir-296,58817628,58817648,-	1.34631	1.27457
hsa-miR-6770-3p	4	9	1	1.35	1.27	16:hsa;hsa-mir-6770-2,18379390,18379410,-	0.14959	0.141619
hsa-miR-6770-3p	4	9	1	1.35	1.27	16:hsa;hsa-mir-6770-3,18379390,18379410,-	0.14959	0.141619
hsa-miR-6770-3p	4	9	1	1.35	1.27	16:hsa;hsa-mir-6770-2,16329344,16329364,+	0.14959	0.141619
hsa-miR-505-5p	4	9	9	1.35	1.27	X:hsa;hsa-mir-505,139924162,139924183,-	1.34631	1.27457
hsa-miR-1294	3	9	9	1.35	1.27	5:hsa;hsa-mir-1294,154347153,154347174,+	1.34631	1.27457
hsa-miR-3159	3	9	9	1.35	1.27	11:hsa;hsa-mir-3159,18387796,18387817,+	1.34631	1.27457
hsa-miR-548l	3	9	9	1.35	1.27	11:hsa;hsa-mir-548l,94466509,94466530,-	1.34631	1.27457
hsa-miR-6770-3p	4	9	1	1.35	1.27	16:hsa;hsa-mir-6770-1,16329344,16329364,+	0.14959	0.141619
hsa-miR-7-5p	5	9	3	1.35	1.27	15:hsa;hsa-mir-7-2,88611856,88611879,+	0.448771	0.424856
hsa-miR-6770-3p	4	9	1	1.35	1.27	16:hsa;hsa-mir-6770-1,18379390,18379410,-	0.14959	0.141619
hsa-miR-33b-3p	2	9	9	1.35	1.27	17:hsa;hsa-mir-33b,17813889,17813910,-	1.34631	1.27457
hsa-miR-1270	7	9	9	1.35	1.27	19:hsa;hsa-mir-1270,20399284,20399306,-	1.34631	1.27457
hsa-miR-579-5p	5	9	9	1.35	1.27	5:hsa;hsa-mir-579,32394402,32394423,-	1.34631	1.27457
hsa-miR-23c	8	8	6	1.2	1.13	X:hsa;hsa-mir-23c,20017153,20017174,-	0.897543	0.849712
hsa-miR-494-5p	5	8	8	1.2	1.13	14:hsa;hsa-mir-494,101029648,101029670,+	1.19672	1.13295
hsa-miR-378d	5	8	2.25	1.2	1.13	8:hsa;hsa-mir-378d-2,93916043,93916062,-	0.336578	0.318642
hsa-miR-432-3p	2	8	8	1.2	1.13	14:hsa;hsa-mir-432,100884544,100884564,+	1.19672	1.13295
hsa-miR-616-3p	6	8	8	1.2	1.13	12:hsa;hsa-mir-616,57519218,57519239,-	1.19672	1.13295
hsa-miR-615-5p	5	8	8	1.2	1.13	12:hsa;hsa-mir-615,54033967,54033988,+	1.19672	1.13295
hsa-miR-378d	5	8	2.25	1.2	1.13	4:hsa;hsa-mir-378d-1,5923305,5923324,-	0.336578	0.318642
hsa-miR-545-5p	4	8	8	1.2	1.13	X:hsa;hsa-mir-545,74287128,74287149,-	1.19672	1.13295
hsa-miR-1910-5p	2	8	8	1.2	1.13	16:hsa;hsa-mir-1910,85741632,85741652,-	1.19672	1.13295
hsa-miR-889-5p	3	8	8	1.2	1.13	14:hsa;hsa-mir-889,101047911,101047932,+	1.19672	1.13295
hsa-miR-1305	2	8	8	1.2	1.13	4:hsa;hsa-mir-1305,182169343,182169364,+	1.19672	1.13295
hsa-miR-500b-5p	4	8	4	1.2	1.13	X:hsa;hsa-mir-500b,50010682,50010699,+	0.598362	0.566475
hsa-miR-5100	1	8	8	1.2	1.13	10:hsa;hsa-mir-5100,42997630,42997651,+	1.19672	1.13295
hsa-miR-3065-5p	7	8	8	1.2	1.13	17:hsa;hsa-mir-3065,81125886,81125908,+	1.19672	1.13295
hsa-miR-548s	5	8	7.33	1.2	1.13	2:hsa;hsa-mir-548s,11767495,11767517,+	1.097	1.03854
hsa-miR-629-5p	4	7	7	1.05	0.99	15:hsa;hsa-mir-629,70079393,70079413,-	1.04713	0.991331
hsa-miR-5001-3p	6	7	7	1.05	0.99	2:hsa;hsa-mir-5001,232550533,232550554,-	1.04713	0.991331
hsa-miR-92b-5p	3	7	7	1.05	0.99	1:hsa;hsa-mir-92b,155195196,155195217,+	1.04713	0.991331
hsa-miR-1295a	4	7	7	1.05	0.99	1:hsa;hsa-mir-1295a,171101776,171101796,-	1.04713	0.991331
hsa-miR-3691-5p	6	7	7	1.05	0.99	6:hsa;hsa-mir-3691,5148247,5148269,-	1.04713	0.991331
hsa-miR-499a-5p	4	7	7	1.05	0.99	20:hsa;hsa-mir-499a,34990408,34990428,+	1.04713	0.991331
hsa-miR-2116-5p	4	7	7	1.05	0.99	15:hsa;hsa-mir-2116,59171196,59171216,-	1.04713	0.991331
hsa-miR-548u	3	7	7	1.05	0.99	6:hsa;hsa-mir-548u,57390180,57390202,+	1.04713	0.991331
hsa-miR-655-5p	2	7	7	1.05	0.99	14:hsa;hsa-mir-655,101049572,101049593,+	1.04713	0.991331
hsa-miR-103a-2-5p	2	7	7	1.05	0.99	20:hsa;hsa-mir-103a-2,3917504,3917526,+	1.04713	0.991331
hsa-miR-147b-3p	4	7	7	1.05	0.99	15:hsa;hsa-mir-147b,45433098,45433118,+	1.04713	0.991331
hsa-miR-1245b-3p	6	7	7	1.05	0.99	2:hsa;hsa-mir-1245b,188978134,188978155,-	1.04713	0.991331
hsa-miR-6840-3p	3	7	7	1.05	0.99	7:hsa;hsa-mir-6840,100356696,100356717,+	1.04713	0.991331
hsa-miR-106a-5p	3	7	3.5	1.05	0.99	X:hsa;hsa-mir-106a,134170210,134170232,-	0.523567	0.495665
hsa-miR-624-5p	2	7	7	1.05	0.99	14:hsa;hsa-mir-624,31014661,31014682,-	1.04713	0.991331
hsa-miR-301a-5p	4	7	7	1.05	0.99	17:hsa;hsa-mir-301a,59151149,59151170,-	1.04713	0.991331
hsa-miR-3065-3p	6	7	7	1.05	0.99	17:hsa;hsa-mir-3065,81125926,81125948,+	1.04713	0.991331
hsa-miR-5699-3p	5	7	7	1.05	0.99	10:hsa;hsa-mir-5699,641747,641768,-	1.04713	0.991331
hsa-miR-362-3p	3	6	6	0.9	0.85	X:hsa;hsa-mir-362,50009005,50009026,+	0.897543	0.849712
hsa-miR-3160-3p	4	6	3	0.9	0.85	11:hsa;hsa-mir-3160-1,46451858,46451879,-	0.448771	0.424856
hsa-miR-6511a-5p	6	6	0.3	0.9	0.85	16:hsa;hsa-mir-6511a-2,16368880,16368902,+	0.0448771	0.0424856
hsa-miR-188-3p	1	6	6	0.9	0.85	X:hsa;hsa-mir-188,50003556,50003576,+	0.897543	0.849712
hsa-miR-10527-5p	2	6	6	0.9	0.85	12:hsa;hsa-mir-10527,63823663,63823685,+	0.897543	0.849712
hsa-miR-6511a-5p	6	6	0.3	0.9	0.85	16:hsa;hsa-mir-6511a-2,14925941,14925963,+	0.0448771	0.0424856
hsa-miR-6511a-5p	6	6	0.3	0.9	0.85	16:hsa;hsa-mir-6511a-3,16324592,16324614,+	0.0448771	0.0424856
hsa-miR-6511b-5p	6	6	0.3	0.9	0.85	16:hsa;hsa-mir-6511b-1,2106679,2106702,-	0.0448771	0.0424856
hsa-miR-3130-5p	4	6	3.5	0.9	0.85	2:hsa;hsa-mir-3130-1,206783246,206783266,-	0.523567	0.495665
hsa-miR-6511b-5p	6	6	0.3	0.9	0.85	16:hsa;hsa-mir-6511b-2,2106683,2106706,-	0.0448771	0.0424856
hsa-miR-190b-5p	3	6	6	0.9	0.85	1:hsa;hsa-mir-190b,154193675,154193696,-	0.897543	0.849712
hsa-miR-3942-5p	2	6	6	0.9	0.85	15:hsa;hsa-mir-3942,35372278,35372299,-	0.897543	0.849712
hsa-miR-6511a-5p	6	6	0.3	0.9	0.85	16:hsa;hsa-mir-6511a-4,18344017,18344039,-	0.0448771	0.0424856
hsa-miR-6511a-5p	6	6	0.3	0.9	0.85	16:hsa;hsa-mir-6511a-4,16368880,16368902,+	0.0448771	0.0424856
hsa-miR-6511b-5p	6	6	0.3	0.9	0.85	16:hsa;hsa-mir-6511b-2,15134080,15134103,-	0.0448771	0.0424856
hsa-miR-6511a-5p	6	6	0.3	0.9	0.85	16:hsa;hsa-mir-6511a-3,14925941,14925963,+	0.0448771	0.0424856
hsa-miR-1267	2	6	6	0.9	0.85	13:hsa;hsa-mir-1267,107531182,107531202,-	0.897543	0.849712
hsa-miR-6511a-5p	6	6	0.3	0.9	0.85	16:hsa;hsa-mir-6511a-2,18344017,18344039,-	0.0448771	0.0424856
hsa-miR-6511a-5p	6	6	0.3	0.9	0.85	16:hsa;hsa-mir-6511a-4,16324592,16324614,+	0.0448771	0.0424856
hsa-miR-376c-5p	3	6	3	0.9	0.85	14:hsa;hsa-mir-376c,101039694,101039714,+	0.448771	0.424856
hsa-miR-6511a-5p	6	6	0.3	0.9	0.85	16:hsa;hsa-mir-6511a-1,16324592,16324614,+	0.0448771	0.0424856
hsa-miR-4766-3p	5	6	6	0.9	0.85	22:hsa;hsa-mir-4766,40813928,40813948,-	0.897543	0.849712
hsa-miR-483-5p	4	6	6	0.9	0.85	11:hsa;hsa-mir-483,2134141,2134162,-	0.897543	0.849712
hsa-miR-6511a-5p	6	6	0.3	0.9	0.85	16:hsa;hsa-mir-6511a-1,16368880,16368902,+	0.0448771	0.0424856
hsa-miR-6511b-5p	6	6	0.3	0.9	0.85	16:hsa;hsa-mir-6511b-1,15134076,15134099,-	0.0448771	0.0424856
hsa-miR-582-5p	3	6	6	0.9	0.85	5:hsa;hsa-mir-582,59703621,59703643,-	0.897543	0.849712
hsa-miR-3935	6	6	6	0.9	0.85	16:hsa;hsa-mir-3935,56245577,56245598,+	0.897543	0.849712
hsa-miR-6515-5p	1	6	6	0.9	0.85	19:hsa;hsa-mir-6515,12940486,12940506,+	0.897543	0.849712
hsa-miR-4785	3	6	6	0.9	0.85	2:hsa;hsa-mir-4785,160407853,160407873,-	0.897543	0.849712
hsa-miR-548j-5p	4	6	5.5	0.9	0.85	22:hsa;hsa-mir-548j,26555240,26555261,-	0.822747	0.778903
hsa-miR-6511a-5p	6	6	0.3	0.9	0.85	16:hsa;hsa-mir-6511a-3,16368880,16368902,+	0.0448771	0.0424856
hsa-miR-643	2	6	6	0.9	0.85	19:hsa;hsa-mir-643,52281857,52281878,+	0.897543	0.849712
hsa-miR-6511a-5p	6	6	0.3	0.9	0.85	16:hsa;hsa-mir-6511a-2,16324592,16324614,+	0.0448771	0.0424856
hsa-miR-376b-5p	3	6	3	0.9	0.85	14:hsa;hsa-mir-376b,101040459,101040480,+	0.448771	0.424856
hsa-miR-548at-5p	2	6	6	0.9	0.85	17:hsa;hsa-mir-548at,42494773,42494794,+	0.897543	0.849712
hsa-miR-6511a-5p	6	6	0.3	0.9	0.85	16:hsa;hsa-mir-6511a-1,14925941,14925963,+	0.0448771	0.0424856
hsa-miR-3160-3p	4	6	3	0.9	0.85	11:hsa;hsa-mir-3160-2,46451858,46451879,+	0.448771	0.424856
hsa-miR-6511a-5p	6	6	0.3	0.9	0.85	16:hsa;hsa-mir-6511a-3,18344017,18344039,-	0.0448771	0.0424856
hsa-miR-6511a-5p	6	6	0.3	0.9	0.85	16:hsa;hsa-mir-6511a-4,14925941,14925963,+	0.0448771	0.0424856
hsa-miR-6511a-5p	6	6	0.3	0.9	0.85	16:hsa;hsa-mir-6511a-1,18344017,18344039,-	0.0448771	0.0424856
hsa-miR-4742-3p	4	6	6	0.9	0.85	1:hsa;hsa-mir-4742,224398289,224398311,-	0.897543	0.849712
hsa-miR-6859-5p	3	5	0.31	0.75	0.71	1:hsa;hsa-mir-6859-4,17374,17396,-	0.046747	0.0442558
hsa-miR-6859-5p	3	5	0.31	0.75	0.71	1:hsa;hsa-mir-6859-2,17374,17396,-	0.046747	0.0442558
hsa-miR-6859-5p	3	5	0.31	0.75	0.71	16:hsa;hsa-mir-6859-2,17057,17079,-	0.046747	0.0442558
hsa-miR-6511b-3p	3	5	1.5	0.75	0.71	16:hsa;hsa-mir-6511b-1,2106721,2106743,-	0.224386	0.212428
hsa-miR-323a-5p	2	5	5	0.75	0.71	14:hsa;hsa-mir-323a,101025747,101025768,+	0.747952	0.708094
hsa-miR-6859-5p	3	5	0.31	0.75	0.71	16:hsa;hsa-mir-6859-1,17057,17079,-	0.046747	0.0442558
hsa-miR-6882-5p	4	5	5	0.75	0.71	15:hsa;hsa-mir-6882,74840647,74840668,-	0.747952	0.708094
hsa-miR-4761-3p	2	5	5	0.75	0.71	22:hsa;hsa-mir-4761,19963814,19963834,+	0.747952	0.708094
hsa-miR-6859-5p	3	5	0.31	0.75	0.71	1:hsa;hsa-mir-6859-3,17374,17396,-	0.046747	0.0442558
hsa-miR-3138	5	5	5	0.75	0.71	4:hsa;hsa-mir-3138,10078658,10078681,-	0.747952	0.708094
hsa-miR-610	1	5	5	0.75	0.71	11:hsa;hsa-mir-610,28056830,28056850,+	0.747952	0.708094
hsa-miR-6859-5p	3	5	0.31	0.75	0.71	15:hsa;hsa-mir-6859-4,101973529,101973551,+	0.046747	0.0442558
hsa-miR-6859-5p	3	5	0.31	0.75	0.71	1:hsa;hsa-mir-6859-1,17374,17396,-	0.046747	0.0442558
hsa-miR-6859-5p	3	5	0.31	0.75	0.71	15:hsa;hsa-mir-6859-2,101973529,101973551,+	0.046747	0.0442558
hsa-miR-1262	5	5	5	0.75	0.71	1:hsa;hsa-mir-1262,68183531,68183552,-	0.747952	0.708094
hsa-miR-219b-3p	3	5	5	0.75	0.71	9:hsa;hsa-mir-219b,128392676,128392698,+	0.747952	0.708094
hsa-miR-203a-3p	4	5	5	0.75	0.71	14:hsa;hsa-mir-203a,104117469,104117490,+	0.747952	0.708094
hsa-miR-1275	2	5	5	0.75	0.71	6:hsa;hsa-mir-1275,33999989,34000005,-	0.747952	0.708094
hsa-miR-3613-3p	2	5	5	0.75	0.71	13:hsa;hsa-mir-3613,49996467,49996490,-	0.747952	0.708094
hsa-miR-6859-5p	3	5	0.31	0.75	0.71	16:hsa;hsa-mir-6859-3,17057,17079,-	0.046747	0.0442558
hsa-miR-6859-5p	3	5	0.31	0.75	0.71	16:hsa;hsa-mir-6859-4,17057,17079,-	0.046747	0.0442558
hsa-miR-556-5p	2	5	5	0.75	0.71	1:hsa;hsa-mir-556,162342561,162342582,+	0.747952	0.708094
hsa-miR-6859-5p	3	5	0.31	0.75	0.71	1:hsa;hsa-mir-6859-1,187896,187918,-	0.046747	0.0442558
hsa-miR-6859-5p	3	5	0.31	0.75	0.71	1:hsa;hsa-mir-6859-4,187896,187918,-	0.046747	0.0442558
hsa-miR-26a-2-3p	2	5	5	0.75	0.71	12:hsa;hsa-mir-26a-2,57824660,57824681,-	0.747952	0.708094
hsa-miR-943	2	5	5	0.75	0.71	4:hsa;hsa-mir-943,1986438,1986458,-	0.747952	0.708094
hsa-miR-6511b-3p	3	5	1.5	0.75	0.71	16:hsa;hsa-mir-6511b-1,15134118,15134140,-	0.224386	0.212428
hsa-miR-196b-3p	2	5	5	0.75	0.71	7:hsa;hsa-mir-196b,27169529,27169550,-	0.747952	0.708094
hsa-miR-5683	3	5	5	0.75	0.71	6:hsa;hsa-mir-5683,6169343,6169366,+	0.747952	0.708094
hsa-miR-186-3p	3	5	5	0.75	0.71	1:hsa;hsa-mir-186,71067684,71067705,-	0.747952	0.708094
hsa-miR-3130-5p	3	5	2.5	0.75	0.71	2:hsa;hsa-mir-3130-2,206783246,206783266,+	0.373976	0.354047
hsa-miR-449a	2	5	5	0.75	0.71	5:hsa;hsa-mir-449a,55170547,55170568,-	0.747952	0.708094
hsa-miR-338-3p	2	5	5	0.75	0.71	17:hsa;hsa-mir-338,81125924,81125945,-	0.747952	0.708094
hsa-miR-488-3p	4	5	5	0.75	0.71	1:hsa;hsa-mir-488,177029414,177029434,-	0.747952	0.708094
hsa-miR-23b-5p	5	5	5	0.75	0.71	9:hsa;hsa-mir-23b,95085227,95085248,+	0.747952	0.708094
hsa-miR-6837-3p	3	5	5	0.75	0.71	7:hsa;hsa-mir-6837,44051807,44051829,+	0.747952	0.708094
hsa-miR-6859-5p	3	5	0.31	0.75	0.71	15:hsa;hsa-mir-6859-3,101973529,101973551,+	0.046747	0.0442558
hsa-miR-6859-5p	3	5	0.31	0.75	0.71	15:hsa;hsa-mir-6859-1,101973529,101973551,+	0.046747	0.0442558
hsa-miR-6859-5p	3	5	0.31	0.75	0.71	1:hsa;hsa-mir-6859-2,187896,187918,-	0.046747	0.0442558
hsa-miR-6859-5p	3	5	0.31	0.75	0.71	1:hsa;hsa-mir-6859-3,187896,187918,-	0.046747	0.0442558
hsa-miR-3173-5p	2	5	5	0.75	0.71	14:hsa;hsa-mir-3173,95137923,95137944,-	0.747952	0.708094
hsa-miR-3939	1	4	4	0.6	0.57	6:hsa;hsa-mir-3939,166997868,166997889,-	0.598362	0.566475
hsa-miR-5588-5p	2	4	4	0.6	0.57	3:hsa;hsa-mir-5588,185253210,185253230,-	0.598362	0.566475
hsa-miR-4511	2	4	4	0.6	0.57	15:hsa;hsa-mir-4511,65719260,65719281,-	0.598362	0.566475
hsa-miR-4474-3p	4	4	4	0.6	0.57	9:hsa;hsa-mir-4474,20502309,20502330,-	0.598362	0.566475
hsa-miR-19a-5p	3	4	4	0.6	0.57	13:hsa;hsa-mir-19a,91350904,91350925,+	0.598362	0.566475
hsa-miR-597-3p	3	4	4	0.6	0.57	8:hsa;hsa-mir-597,9741729,9741751,+	0.598362	0.566475
hsa-miR-6770-5p	2	4	0.44	0.6	0.57	16:hsa;hsa-mir-6770-2,14930825,14930848,+	0.0664846	0.0629416
hsa-miR-6770-5p	2	4	0.44	0.6	0.57	16:hsa;hsa-mir-6770-1,14930825,14930848,+	0.0664846	0.0629416
hsa-miR-4510	2	4	2	0.6	0.57	15:hsa;hsa-mir-4510,35926863,35926884,+	0.299181	0.283237
hsa-miR-541-3p	4	4	4	0.6	0.57	14:hsa;hsa-mir-541,101064548,101064569,+	0.598362	0.566475
hsa-miR-6511b-3p	2	4	1	0.6	0.57	16:hsa;hsa-mir-6511b-2,2106725,2106747,-	0.14959	0.141619
hsa-miR-642a-5p	2	4	4	0.6	0.57	19:hsa;hsa-mir-642a,45674943,45674964,+	0.598362	0.566475
hsa-miR-6770-5p	2	4	0.44	0.6	0.57	16:hsa;hsa-mir-6770-3,16329310,16329333,+	0.0664846	0.0629416
hsa-miR-551b-3p	2	4	4	0.6	0.57	3:hsa;hsa-mir-551b,168551914,168551934,+	0.598362	0.566475
hsa-miR-6516-5p	3	4	4	0.6	0.57	17:hsa;hsa-mir-6516,77089428,77089449,+	0.598362	0.566475
hsa-miR-3688-3p	3	4	2.5	0.6	0.57	4:hsa;hsa-mir-3688-1,159128861,159128882,-	0.373976	0.354047
hsa-miR-6511b-3p	2	4	1	0.6	0.57	16:hsa;hsa-mir-6511b-2,15134122,15134144,-	0.14959	0.141619
hsa-miR-6513-3p	2	4	4	0.6	0.57	2:hsa;hsa-mir-6513,218280166,218280186,-	0.598362	0.566475
hsa-miR-6770-5p	2	4	0.44	0.6	0.57	16:hsa;hsa-mir-6770-3,14930825,14930848,+	0.0664846	0.0629416
hsa-miR-4773	1	4	2	0.6	0.57	2:hsa;hsa-mir-4773-2,151368381,151368402,-	0.299181	0.283237
hsa-miR-4482-3p	3	4	4	0.6	0.57	10:hsa;hsa-mir-4482,104268379,104268400,-	0.598362	0.566475
hsa-miR-219b-5p	3	4	4	0.6	0.57	9:hsa;hsa-mir-219b,128392634,128392655,+	0.598362	0.566475
hsa-miR-585-3p	3	4	4	0.6	0.57	5:hsa;hsa-mir-585,169263661,169263679,-	0.598362	0.566475
hsa-miR-6770-5p	2	4	0.44	0.6	0.57	16:hsa;hsa-mir-6770-2,18379356,18379379,-	0.0664846	0.0629416
hsa-miR-6770-5p	2	4	0.44	0.6	0.57	16:hsa;hsa-mir-6770-3,18379356,18379379,-	0.0664846	0.0629416
hsa-miR-4773	1	4	2	0.6	0.57	2:hsa;hsa-mir-4773-1,151368381,151368402,+	0.299181	0.283237
hsa-miR-4660	2	4	4	0.6	0.57	8:hsa;hsa-mir-4660,9048453,9048475,+	0.598362	0.566475
hsa-miR-2276-3p	3	4	4	0.6	0.57	13:hsa;hsa-mir-2276,24162469,24162490,+	0.598362	0.566475
hsa-miR-6770-5p	2	4	0.44	0.6	0.57	16:hsa;hsa-mir-6770-2,16329310,16329333,+	0.0664846	0.0629416
hsa-miR-1193	4	4	4	0.6	0.57	14:hsa;hsa-mir-1193,101030061,101030083,+	0.598362	0.566475
hsa-miR-4479	3	4	4	0.6	0.57	9:hsa;hsa-mir-4479,136886777,136886798,+	0.598362	0.566475
hsa-miR-5695	3	4	4	0.6	0.57	19:hsa;hsa-mir-5695,12920373,12920394,+	0.598362	0.566475
hsa-miR-3944-3p	4	4	4	0.6	0.57	10:hsa;hsa-mir-3944,133371618,133371640,-	0.598362	0.566475
hsa-miR-6858-5p	3	4	4	0.6	0.57	X:hsa;hsa-mir-6858,154450320,154450341,+	0.598362	0.566475
hsa-miR-6770-5p	2	4	0.44	0.6	0.57	16:hsa;hsa-mir-6770-1,16329310,16329333,+	0.0664846	0.0629416
hsa-miR-5010-5p	2	4	4	0.6	0.57	17:hsa;hsa-mir-5010,42514208,42514229,+	0.598362	0.566475
hsa-miR-6770-5p	2	4	0.44	0.6	0.57	16:hsa;hsa-mir-6770-1,18379356,18379379,-	0.0664846	0.0629416
hsa-miR-141-3p	2	4	4	0.6	0.57	12:hsa;hsa-mir-141,6964155,6964176,+	0.598362	0.566475
hsa-miR-3940-3p	4	4	4	0.6	0.57	19:hsa;hsa-mir-3940,6416466,6416487,-	0.598362	0.566475
hsa-miR-92a-1-5p	2	4	4	0.6	0.57	13:hsa;hsa-mir-92a-1,91351324,91351346,+	0.598362	0.566475
hsa-miR-1278	3	4	4	0.6	0.57	1:hsa;hsa-mir-1278,193136552,193136573,+	0.598362	0.566475
hsa-miR-5706	2	4	4	0.6	0.57	5:hsa;hsa-mir-5706,119154646,119154667,+	0.598362	0.566475
hsa-miR-3918	1	4	4	0.6	0.57	6:hsa;hsa-mir-3918,158764679,158764699,-	0.598362	0.566475
hsa-miR-6511a-3p	2	3	0.19	0.45	0.42	16:hsa;hsa-mir-6511a-2,16368919,16368940,+	0.0280482	0.0265535
hsa-miR-7703	1	3	3	0.45	0.42	14:hsa;hsa-mir-7703,24143543,24143565,-	0.448771	0.424856
hsa-miR-4638-3p	3	3	3	0.45	0.42	5:hsa;hsa-mir-4638,181222600,181222622,-	0.448771	0.424856
hsa-miR-3136-5p	3	3	3	0.45	0.42	3:hsa;hsa-mir-3136,69048967,69048989,-	0.448771	0.424856
hsa-miR-26a-1-3p	3	3	3	0.45	0.42	3:hsa;hsa-mir-26a-1,37969452,37969473,+	0.448771	0.424856
hsa-miR-6842-3p	2	3	3	0.45	0.42	8:hsa;hsa-mir-6842,27433413,27433434,+	0.448771	0.424856
hsa-miR-1256	3	3	3	0.45	0.42	1:hsa;hsa-mir-1256,20988348,20988369,-	0.448771	0.424856
hsa-miR-6511a-3p	2	3	0.19	0.45	0.42	16:hsa;hsa-mir-6511a-2,14925980,14926001,+	0.0280482	0.0265535
hsa-miR-6511a-3p	2	3	0.19	0.45	0.42	16:hsa;hsa-mir-6511a-3,16324631,16324652,+	0.0280482	0.0265535
hsa-miR-7704	2	3	3	0.45	0.42	2:hsa;hsa-mir-7704,176188843,176188861,+	0.448771	0.424856
hsa-miR-586	3	3	3	0.45	0.42	6:hsa;hsa-mir-586,45197689,45197710,-	0.448771	0.424856
hsa-miR-3611	3	3	3	0.45	0.42	10:hsa;hsa-mir-3611,35079649,35079669,-	0.448771	0.424856
hsa-miR-502-5p	2	3	3	0.45	0.42	X:hsa;hsa-mir-502,50014613,50014633,+	0.448771	0.424856
hsa-miR-2114-5p	1	3	3	0.45	0.42	X:hsa;hsa-mir-2114,150228016,150228037,+	0.448771	0.424856
hsa-miR-1322	2	3	3	0.45	0.42	8:hsa;hsa-mir-1322,10825423,10825441,-	0.448771	0.424856
hsa-miR-6724-5p	3	3	0.11	0.45	0.42	GL000220.1:hsa;hsa-mir-6724-2,148714,148736,+	0.0160275	0.0151734
hsa-miR-3064-5p	2	3	3	0.45	0.42	17:hsa;hsa-mir-3064,64500776,64500796,-	0.448771	0.424856
hsa-miR-570-3p	2	3	3	0.45	0.42	3:hsa;hsa-mir-570,195699460,195699481,+	0.448771	0.424856
[truncated: 365 more rows]

## Sheet: 10h-hsv1
Table S3: Human (hsa-) and herpes simplex virus 1 (hsv1-) mature miRNAs detected in mock samples, and at 10 h.p.i., and 24 h.p.i.
[truncated: 19 more rows]

[truncated: 3 more sheets: 24hpi-all, 24h-hsa, 24h-hsv1]
