# Supplementary material for: The Virus-induced Upregulation of the miR-183/96/182 Cluster and the FoxO Family Protein Members are not Required for the Efficient Replication of HSV-1
Source: Preprints.org preprint supplement (doi:10.20944/preprints202205.0363.v1), 2022-05-26
Supplement: Supplementary file 9 [file Table S4.xlsx]

## Sheet: Sheet1
Table S4: Overlap between TargetScan and MiRDB search
33 common elements in "miRDB " and "Targetscan":
FRS2
COL25A1
SOX6
FRMD5
FOXO1
ARHGAP6
CEP170B
REV1
BNC2
SPRY3
NTN4
PLCB4
RAPGEF4
CNOT6L
BRMS1L
FNDC3B
TCF7L2
QKI
DAAM1
DMXL1
MFAP3
RHPN2
REPS2
KCNJ14
CELF2
DGCR2
DCX
NR4A3
RHOBTB1
BACH2
PTPN4
SLC6A6
CELF1
